# Supplementary material
Source: PubMed Central journal article supplement (PMC4528771)
Supplement: supp_pp.15.00826_PP2015-00826D_supp.pdf [file supp_pp.15.00826_PP2015-00826D_supp.pdf]

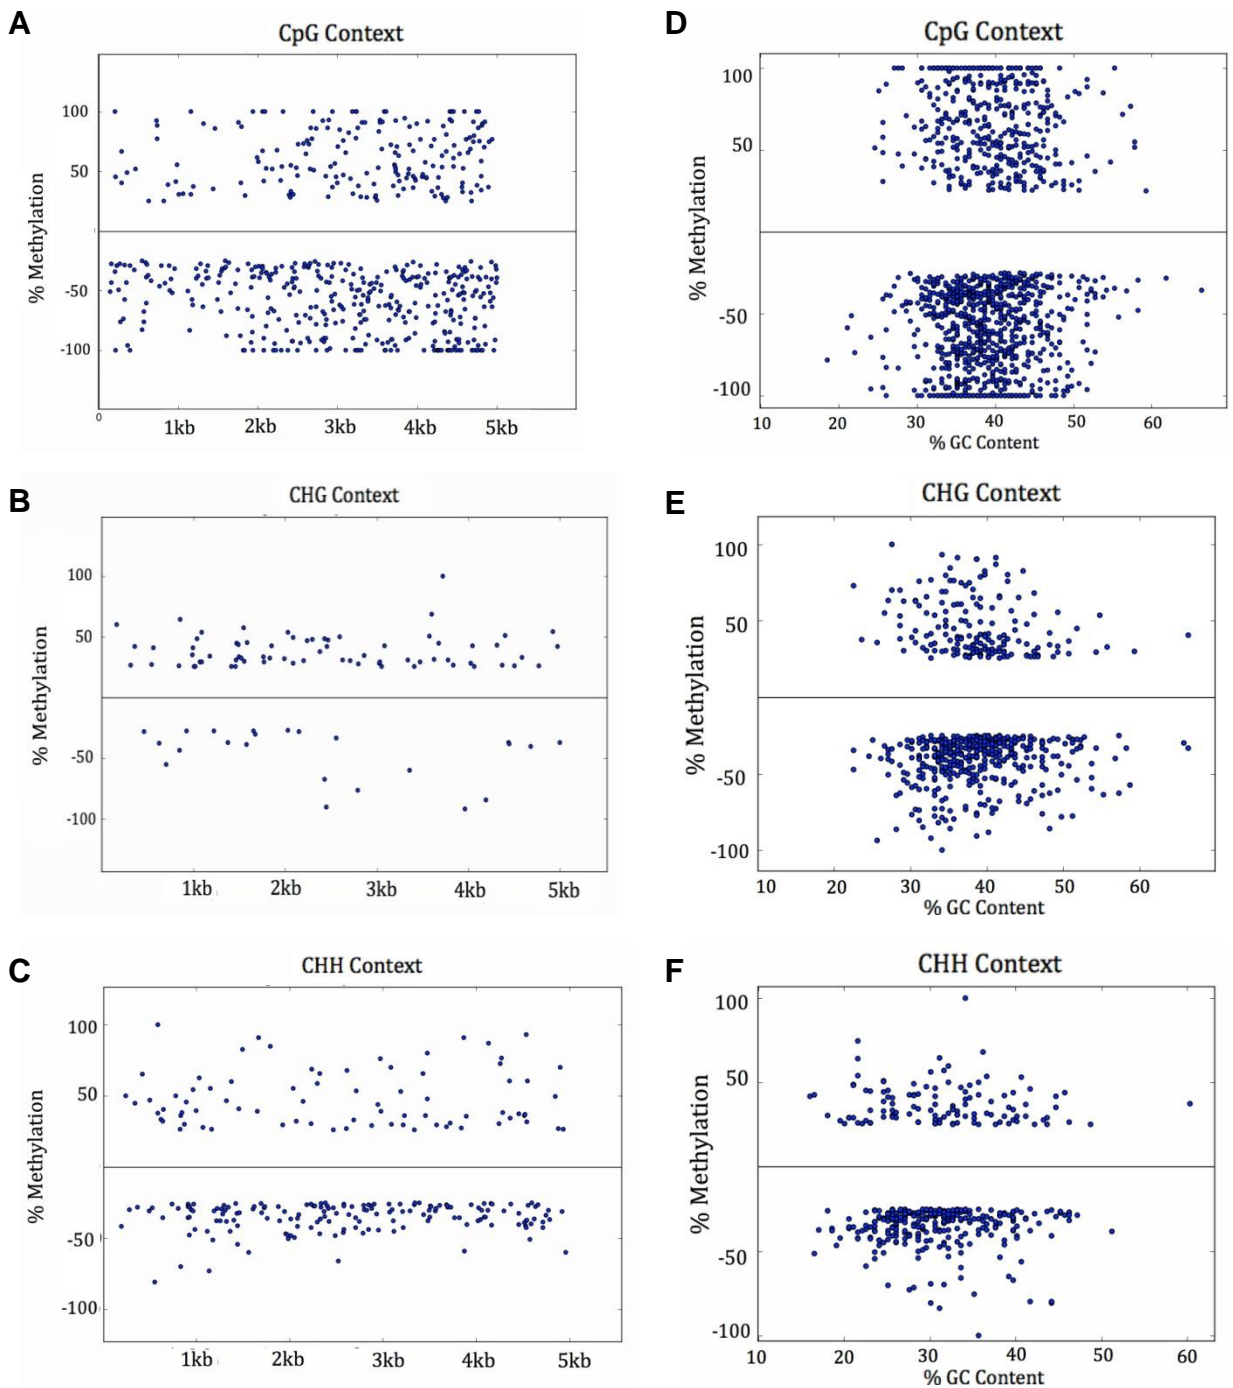

**Supplemental Figure 1:** Differential methylation levels are independent of gene size and GC content. (A-C) Relationship between gene size and differential methylation in CpG (A), CHG (B), and CHH (C) contexts. (D-F) Relationship between GC content and differential methylation in CpG (D), CHG (E), and CHH (F) contexts.

**Supplemental Table1: Summary of cytosine methylation of Methyl-Seq libra**

| <b>Methylation context</b>                                      |                                                           |
|-----------------------------------------------------------------|-----------------------------------------------------------|
| <b>Paired</b>                                                   | <b>Total number of C's analyzed:</b>                      |
|                                                                 |                                                           |
|                                                                 | <b>Total C's in CpG context that are methylated</b>       |
|                                                                 | <b>Total C's in CHG context that are methylated</b>       |
|                                                                 | <b>Total C's in CHH context that are methylated</b>       |
|                                                                 | <b>Total C's in unknown context that are methylated</b>   |
|                                                                 |                                                           |
|                                                                 | <b>Total C's in CpG context that are unmethylated</b>     |
|                                                                 | <b>Total C's in CHG context that are unmethylated</b>     |
|                                                                 | <b>Total C's in CHH context that are unmethylated</b>     |
|                                                                 | <b>Total C's in unknown context that are unmethylated</b> |
|                                                                 |                                                           |
|                                                                 | <b>% C's in CpG context that are methylated</b>           |
|                                                                 | <b>% C's in CHG context that are methylated</b>           |
|                                                                 | <b>% C's in CHH context that are methylated</b>           |
| <b>% C's in unknown context (CN or CHN) that are methylated</b> |                                                           |
|                                                                 |                                                           |
| <b>Unpaired</b>                                                 | <b>Total number of C's analyzed</b>                       |
|                                                                 |                                                           |
|                                                                 | <b>Total C's in CpG context that are methylated</b>       |
|                                                                 | <b>Total C's in CHG context that are methylated</b>       |
|                                                                 | <b>Total C's in CHH context that are methylated</b>       |
|                                                                 | <b>Total C's in unknown context that are methylated</b>   |
|                                                                 |                                                           |
|                                                                 | <b>Total C's in CpG context that are unmethylated</b>     |
|                                                                 | <b>Total C's in CHG context that are unmethylated</b>     |
|                                                                 | <b>Total C's in CHH context that are unmethylated</b>     |
|                                                                 | <b>Total C's in unknown context that are unmethylated</b> |
|                                                                 |                                                           |
|                                                                 | <b>% C's in CpG context that are methylated</b>           |
|                                                                 | <b>% C's in CHG context that are methylated</b>           |
|                                                                 | <b>% C's in CHH context that are methylated</b>           |
| <b>% C's in unknown context (CN or CHN) that are methylated</b> |                                                           |

ries prepared from SCN-infected and control samples.

| Control, replication #1 | Control, replication #2 | Control, replication #3 |
|-------------------------|-------------------------|-------------------------|
| 723,456,481             | 857156419               | 293397002               |
|                         |                         |                         |
| 87,767,356              | 102010655               | 34398782                |
| 63,628,939              | 75132310                | 25710478                |
| 27,683,854              | 33567006                | 11452059                |
| 497                     | 598                     | 198                     |
|                         |                         |                         |
| 19954680                | 24381130                | 8392027                 |
| 42936454                | 52191868                | 17845475                |
| 481485198               | 569873450               | 195598181               |
| 1558                    | 1790                    | 572                     |
|                         |                         |                         |
| 81.50%                  | 80.70%                  | 80.40%                  |
| 59.70%                  | 59.00%                  | 59.00%                  |
| 5.40%                   | 5.60%                   | 5.50%                   |
| 24.20%                  | 25.00%                  | 25.70%                  |

|         |         |         |
|---------|---------|---------|
| 5966519 | 7798697 | 2637950 |
|         |         |         |
| 733081  | 930347  | 314077  |
| 529393  | 683277  | 232477  |
| 270379  | 355024  | 123798  |
| 13      | 9       | 2       |
|         |         |         |
| 187052  | 251536  | 86665   |
| 365450  | 490900  | 166938  |
| 3881164 | 5087613 | 1713995 |
| 22      | 18      | 7       |
|         |         |         |
| 79.70%  | 78.70%  | 78.40%  |
| 59.20%  | 58.20%  | 58.20%  |
| 6.50%   | 6.50%   | 6.70%   |
| 37.10%  | 33.30%  | 22.20%  |

| SCN-infected, replication #1 | SCN-infected, replication #2 |
|------------------------------|------------------------------|
| 461144476                    | 894002265                    |
|                              |                              |
| 54054778                     | 89931449                     |
| 39105859                     | 69071527                     |
| 16549283                     | 31602225                     |
| 423                          | 540                          |
|                              |                              |
| 13377313                     | 26203394                     |
| 27783614                     | 57164432                     |
| 310273629                    | 620029238                    |
| 1227                         | 1521                         |
|                              |                              |
| 80.20%                       | 77.40%                       |
| 58.50%                       | 54.70%                       |
| 5.10%                        | 4.80%                        |
| 25.60%                       | 26.20%                       |

|         |         |
|---------|---------|
| 4803452 | 8844841 |
|         |         |
| 554858  | 899974  |
| 403668  | 685436  |
| 199520  | 355432  |
| 6       | 11      |
|         |         |
| 165789  | 300416  |
| 306784  | 595332  |
| 3172833 | 6008251 |
| 18      | 24      |
|         |         |
| 77.00%  | 75.00%  |
| 56.80%  | 53.50%  |
| 5.90%   | 5.60%   |
| 25.00%  | 31.40%  |

| <b>SCN-infected, replication #3</b> |
|-------------------------------------|
| 437810581                           |
|                                     |
| 48290336                            |
| 35646616                            |
| 16721866                            |
| 278                                 |
|                                     |
| 12684354                            |
| 26211390                            |
| 298256019                           |
| 926                                 |
|                                     |
| 79.20%                              |
| 57.60%                              |
| 5.30%                               |
| 23.10%                              |

|         |
|---------|
| 4222448 |
|         |
| 464581  |
| 342631  |
| 191778  |
| 8       |
|         |
| 140767  |
| 264589  |
| 2818102 |
| 6       |
|         |
| 76.70%  |
| 56.40%  |
| 6.40%   |
| 57.10%  |

**Supplemental Table 2: List of 428 hyper-methylated CpG  
METHYLATED REGIONS**

---

mytileDiff25p200.hyper\_CpG.Chr01.422401-422600  
mytileDiff25p200.hyper\_CpG.Chr01.2841001-2841200  
mytileDiff25p200.hyper\_CpG.Chr01.3016201-3016400  
mytileDiff25p200.hyper\_CpG.Chr01.4030601-4030800  
mytileDiff25p200.hyper\_CpG.Chr01.5279201-5279400  
mytileDiff25p200.hyper\_CpG.Chr01.14063401-14063600  
mytileDiff25p200.hyper\_CpG.Chr01.16538001-16538200  
mytileDiff25p200.hyper\_CpG.Chr01.27007401-27007600  
mytileDiff25p200.hyper\_CpG.Chr01.38062001-38062200  
mytileDiff25p200.hyper\_CpG.Chr01.46839601-46839800  
mytileDiff25p200.hyper\_CpG.Chr01.46839601-46839800  
mytileDiff25p200.hyper\_CpG.Chr01.49566001-49566200  
mytileDiff25p200.hyper\_CpG.Chr01.50644001-50644200  
mytileDiff25p200.hyper\_CpG.Chr01.50750201-50750400  
mytileDiff25p200.hyper\_CpG.Chr01.51017001-51017200  
mytileDiff25p200.hyper\_CpG.Chr01.51872001-51872200  
mytileDiff25p200.hyper\_CpG.Chr01.52398001-52398200  
mytileDiff25p200.hyper\_CpG.Chr01.54133801-54134000  
mytileDiff25p200.hyper\_CpG.Chr01.56740801-56741000  
mytileDiff25p200.hyper\_CpG.Chr02.816801-817000  
mytileDiff25p200.hyper\_CpG.Chr02.826801-827000  
mytileDiff25p200.hyper\_CpG.Chr02.1085201-1085400  
mytileDiff25p200.hyper\_CpG.Chr02.1285001-1285200  
mytileDiff25p200.hyper\_CpG.Chr02.3988001-3988200  
mytileDiff25p200.hyper\_CpG.Chr02.4982601-4982800  
mytileDiff25p200.hyper\_CpG.Chr02.6778801-6779000  
mytileDiff25p200.hyper\_CpG.Chr02.6899401-6899600  
mytileDiff25p200.hyper\_CpG.Chr02.8524601-8524800  
mytileDiff25p200.hyper\_CpG.Chr02.8735001-8735200  
mytileDiff25p200.hyper\_CpG.Chr02.9714001-9714200  
mytileDiff25p200.hyper\_CpG.Chr02.10252601-10252800  
mytileDiff25p200.hyper\_CpG.Chr02.11023001-11023200  
mytileDiff25p200.hyper\_CpG.Chr02.12959201-12959400  
mytileDiff25p200.hyper\_CpG.Chr02.13183401-13183600  
mytileDiff25p200.hyper\_CpG.Chr02.13622001-13622200  
mytileDiff25p200.hyper\_CpG.Chr02.14151201-14151400  
mytileDiff25p200.hyper\_CpG.Chr02.31200201-31200400  
mytileDiff25p200.hyper\_CpG.Chr02.31238201-31238400  
mytileDiff25p200.hyper\_CpG.Chr02.39710601-39710800

mytileDiff25p200.hyper\_CpG.Chr02.40121801-40122000  
mytileDiff25p200.hyper\_CpG.Chr02.41137001-41137200  
mytileDiff25p200.hyper\_CpG.Chr02.42040001-42040200  
mytileDiff25p200.hyper\_CpG.Chr02.43332201-43332400  
mytileDiff25p200.hyper\_CpG.Chr02.44468201-44468400  
mytileDiff25p200.hyper\_CpG.Chr02.47734801-47735000  
mytileDiff25p200.hyper\_CpG.Chr03.259401-259600  
mytileDiff25p200.hyper\_CpG.Chr03.439401-439600  
mytileDiff25p200.hyper\_CpG.Chr03.1328201-1328400  
mytileDiff25p200.hyper\_CpG.Chr03.2288001-2288200  
mytileDiff25p200.hyper\_CpG.Chr03.2428801-2429000  
mytileDiff25p200.hyper\_CpG.Chr03.10607201-10607400  
mytileDiff25p200.hyper\_CpG.Chr03.29818801-29819000  
mytileDiff25p200.hyper\_CpG.Chr03.34692601-34692800  
mytileDiff25p200.hyper\_CpG.Chr03.34912601-34912800  
mytileDiff25p200.hyper\_CpG.Chr03.35637001-35637200  
mytileDiff25p200.hyper\_CpG.Chr03.36611201-36611400  
mytileDiff25p200.hyper\_CpG.Chr03.38305001-38305200  
mytileDiff25p200.hyper\_CpG.Chr03.40418601-40418800  
mytileDiff25p200.hyper\_CpG.Chr03.42298801-42299000  
mytileDiff25p200.hyper\_CpG.Chr03.43149201-43149400  
mytileDiff25p200.hyper\_CpG.Chr03.44113601-44113800  
mytileDiff25p200.hyper\_CpG.Chr03.44139201-44139400  
mytileDiff25p200.hyper\_CpG.Chr03.44620401-44620600  
mytileDiff25p200.hyper\_CpG.Chr03.45118401-45118600  
mytileDiff25p200.hyper\_CpG.Chr04.466401-466600  
mytileDiff25p200.hyper\_CpG.Chr04.1111401-1111600  
mytileDiff25p200.hyper\_CpG.Chr04.2527801-2528000  
mytileDiff25p200.hyper\_CpG.Chr04.3352001-3352200  
mytileDiff25p200.hyper\_CpG.Chr04.3544001-3544200  
mytileDiff25p200.hyper\_CpG.Chr04.4635601-4635800  
mytileDiff25p200.hyper\_CpG.Chr04.5105401-5105600  
mytileDiff25p200.hyper\_CpG.Chr04.6352201-6352400  
mytileDiff25p200.hyper\_CpG.Chr04.8222201-8222400  
mytileDiff25p200.hyper\_CpG.Chr04.8222201-8222400  
mytileDiff25p200.hyper\_CpG.Chr04.8368401-8368600  
mytileDiff25p200.hyper\_CpG.Chr04.8407801-8408000  
mytileDiff25p200.hyper\_CpG.Chr04.18898601-18898800  
mytileDiff25p200.hyper\_CpG.Chr04.19941201-19941400  
mytileDiff25p200.hyper\_CpG.Chr04.46434601-46434800  
mytileDiff25p200.hyper\_CpG.Chr04.47433001-47433200

mytileDiff25p200.hyper\_CpG.Chr04.47992801-47993000  
mytileDiff25p200.hyper\_CpG.Chr04.49255001-49255200  
mytileDiff25p200.hyper\_CpG.Chr04.49252601-49252800  
mytileDiff25p200.hyper\_CpG.Chr04.50052201-50052400  
mytileDiff25p200.hyper\_CpG.Chr04.50552201-50552400  
mytileDiff25p200.hyper\_CpG.Chr04.50570801-50571000  
mytileDiff25p200.hyper\_CpG.Chr04.52010201-52010400  
mytileDiff25p200.hyper\_CpG.Chr04.52320401-52320600  
mytileDiff25p200.hyper\_CpG.Chr05.528401-528600  
mytileDiff25p200.hyper\_CpG.Chr05.2534401-2534600  
mytileDiff25p200.hyper\_CpG.Chr05.4141201-4141400  
mytileDiff25p200.hyper\_CpG.Chr05.5618001-5618200  
mytileDiff25p200.hyper\_CpG.Chr05.5876201-5876400  
mytileDiff25p200.hyper\_CpG.Chr05.8216001-8216200  
mytileDiff25p200.hyper\_CpG.Chr05.14964601-14964800  
mytileDiff25p200.hyper\_CpG.Chr05.14964801-14965000  
mytileDiff25p200.hyper\_CpG.Chr05.27877801-27878000  
mytileDiff25p200.hyper\_CpG.Chr05.29552401-29552600  
mytileDiff25p200.hyper\_CpG.Chr05.30981801-30982000  
mytileDiff25p200.hyper\_CpG.Chr05.32464201-32464400  
mytileDiff25p200.hyper\_CpG.Chr05.38175201-38175400  
mytileDiff25p200.hyper\_CpG.Chr05.39612201-39612400  
mytileDiff25p200.hyper\_CpG.Chr05.39861801-39862000  
mytileDiff25p200.hyper\_CpG.Chr05.40260401-40260600  
mytileDiff25p200.hyper\_CpG.Chr05.40258201-40258400  
mytileDiff25p200.hyper\_CpG.Chr06.157801-158000  
mytileDiff25p200.hyper\_CpG.Chr06.3492401-3492600  
mytileDiff25p200.hyper\_CpG.Chr06.3492401-3492600  
mytileDiff25p200.hyper\_CpG.Chr06.5545601-5545800  
mytileDiff25p200.hyper\_CpG.Chr06.7771801-7772000  
mytileDiff25p200.hyper\_CpG.Chr06.7877201-7877400  
mytileDiff25p200.hyper\_CpG.Chr06.11439601-11439800  
mytileDiff25p200.hyper\_CpG.Chr06.11523001-11523200  
mytileDiff25p200.hyper\_CpG.Chr06.14731001-14731200  
mytileDiff25p200.hyper\_CpG.Chr06.16960001-16960200  
mytileDiff25p200.hyper\_CpG.Chr06.21877801-21878000  
mytileDiff25p200.hyper\_CpG.Chr06.22720201-22720400  
mytileDiff25p200.hyper\_CpG.Chr06.44233601-44233800  
mytileDiff25p200.hyper\_CpG.Chr06.44985001-44985200  
mytileDiff25p200.hyper\_CpG.Chr06.47529001-47529200  
mytileDiff25p200.hyper\_CpG.Chr06.48103001-48103200



mytileDiff25p200.hyper\_CpG.Chr06.49405201-49405400  
mytileDiff25p200.hyper\_CpG.Chr06.51002601-51002800  
mytileDiff25p200.hyper\_CpG.Chr06.51095201-51095400  
mytileDiff25p200.hyper\_CpG.Chr06.51273201-51273400  
mytileDiff25p200.hyper\_CpG.Chr07.297201-297400  
mytileDiff25p200.hyper\_CpG.Chr07.1076001-1076200  
mytileDiff25p200.hyper\_CpG.Chr07.1110001-1110200  
mytileDiff25p200.hyper\_CpG.Chr07.2055801-2056000  
mytileDiff25p200.hyper\_CpG.Chr07.3943001-3943200  
mytileDiff25p200.hyper\_CpG.Chr07.5336401-5336600  
mytileDiff25p200.hyper\_CpG.Chr07.9230601-9230800  
mytileDiff25p200.hyper\_CpG.Chr07.10120001-10120200  
mytileDiff25p200.hyper\_CpG.Chr07.11981601-11981800  
mytileDiff25p200.hyper\_CpG.Chr07.14289001-14289200  
mytileDiff25p200.hyper\_CpG.Chr07.16288601-16288800  
mytileDiff25p200.hyper\_CpG.Chr07.18135001-18135200  
mytileDiff25p200.hyper\_CpG.Chr07.19436201-19436400  
mytileDiff25p200.hyper\_CpG.Chr07.29709401-29709600  
mytileDiff25p200.hyper\_CpG.Chr07.30031401-30031600  
mytileDiff25p200.hyper\_CpG.Chr07.35617201-35617400  
mytileDiff25p200.hyper\_CpG.Chr07.42482401-42482600  
mytileDiff25p200.hyper\_CpG.Chr07.43252801-43253000  
mytileDiff25p200.hyper\_CpG.Chr07.43511201-43511400  
mytileDiff25p200.hyper\_CpG.Chr08.1770401-1770600  
mytileDiff25p200.hyper\_CpG.Chr08.2676401-2676600  
mytileDiff25p200.hyper\_CpG.Chr08.5916801-5917000  
mytileDiff25p200.hyper\_CpG.Chr08.6260601-6260800  
mytileDiff25p200.hyper\_CpG.Chr08.6363201-6363400  
mytileDiff25p200.hyper\_CpG.Chr08.7388601-7388800  
mytileDiff25p200.hyper\_CpG.Chr08.8392601-8392800  
mytileDiff25p200.hyper\_CpG.Chr08.8764201-8764400  
mytileDiff25p200.hyper\_CpG.Chr08.9721201-9721400  
mytileDiff25p200.hyper\_CpG.Chr08.10321801-10322000  
mytileDiff25p200.hyper\_CpG.Chr08.10631001-10631200  
mytileDiff25p200.hyper\_CpG.Chr08.12661401-12661600  
mytileDiff25p200.hyper\_CpG.Chr08.14179201-14179400  
mytileDiff25p200.hyper\_CpG.Chr08.15610201-15610400  
mytileDiff25p200.hyper\_CpG.Chr08.15610201-15610400  
mytileDiff25p200.hyper\_CpG.Chr08.21671801-21672000  
mytileDiff25p200.hyper\_CpG.Chr08.22200601-22200800  
mytileDiff25p200.hyper\_CpG.Chr08.28326601-28326800

mytileDiff25p200.hyper\_CpG.Chr08.37747801-37748000  
mytileDiff25p200.hyper\_CpG.Chr08.39406601-39406800  
mytileDiff25p200.hyper\_CpG.Chr08.44140201-44140400  
mytileDiff25p200.hyper\_CpG.Chr08.46885001-46885200  
mytileDiff25p200.hyper\_CpG.Chr09.1008001-1008200  
mytileDiff25p200.hyper\_CpG.Chr09.1677601-1677800  
mytileDiff25p200.hyper\_CpG.Chr09.1881801-1882000  
mytileDiff25p200.hyper\_CpG.Chr09.1989601-1989800  
mytileDiff25p200.hyper\_CpG.Chr09.2001801-2002000  
mytileDiff25p200.hyper\_CpG.Chr09.2348601-2348800  
mytileDiff25p200.hyper\_CpG.Chr09.6079201-6079400  
mytileDiff25p200.hyper\_CpG.Chr09.9570201-9570400  
mytileDiff25p200.hyper\_CpG.Chr09.10778601-10778800  
mytileDiff25p200.hyper\_CpG.Chr09.32770601-32770800  
mytileDiff25p200.hyper\_CpG.Chr09.37712401-37712600  
mytileDiff25p200.hyper\_CpG.Chr09.37834401-37834600  
mytileDiff25p200.hyper\_CpG.Chr09.40216001-40216200  
mytileDiff25p200.hyper\_CpG.Chr09.40785601-40785800  
mytileDiff25p200.hyper\_CpG.Chr09.41268001-41268200  
mytileDiff25p200.hyper\_CpG.Chr09.41284801-41285000  
mytileDiff25p200.hyper\_CpG.Chr09.41874001-41874200  
mytileDiff25p200.hyper\_CpG.Chr09.44081201-44081400  
mytileDiff25p200.hyper\_CpG.Chr09.46916201-46916400  
mytileDiff25p200.hyper\_CpG.Chr09.47007401-47007600  
mytileDiff25p200.hyper\_CpG.Chr09.47339401-47339600  
mytileDiff25p200.hyper\_CpG.Chr09.48526201-48526400  
mytileDiff25p200.hyper\_CpG.Chr09.49813601-49813800  
mytileDiff25p200.hyper\_CpG.Chr09.50185601-50185800  
mytileDiff25p200.hyper\_CpG.Chr10.2435801-2436000  
mytileDiff25p200.hyper\_CpG.Chr10.2544001-2544200  
mytileDiff25p200.hyper\_CpG.Chr10.5403001-5403200  
mytileDiff25p200.hyper\_CpG.Chr10.6623601-6623800  
mytileDiff25p200.hyper\_CpG.Chr10.22650201-22650400  
mytileDiff25p200.hyper\_CpG.Chr10.24145201-24145400  
mytileDiff25p200.hyper\_CpG.Chr10.27235401-27235600  
mytileDiff25p200.hyper\_CpG.Chr10.27235401-27235600  
mytileDiff25p200.hyper\_CpG.Chr10.29479001-29479200  
mytileDiff25p200.hyper\_CpG.Chr10.35730601-35730800  
mytileDiff25p200.hyper\_CpG.Chr10.37744801-37745000  
mytileDiff25p200.hyper\_CpG.Chr10.38530001-38530200  
mytileDiff25p200.hyper\_CpG.Chr10.38986401-38986600

mytileDiff25p200.hyper\_CpG.Chr10.39021801-39022000  
mytileDiff25p200.hyper\_CpG.Chr10.39487801-39488000  
mytileDiff25p200.hyper\_CpG.Chr10.41407001-41407200  
mytileDiff25p200.hyper\_CpG.Chr10.41492001-41492200  
mytileDiff25p200.hyper\_CpG.Chr10.41541001-41541200  
mytileDiff25p200.hyper\_CpG.Chr10.43703601-43703800  
mytileDiff25p200.hyper\_CpG.Chr10.44638001-44638200  
mytileDiff25p200.hyper\_CpG.Chr10.45398201-45398400  
mytileDiff25p200.hyper\_CpG.Chr10.47851001-47851200  
mytileDiff25p200.hyper\_CpG.Chr10.47900001-47900200  
mytileDiff25p200.hyper\_CpG.Chr10.49007201-49007400  
mytileDiff25p200.hyper\_CpG.Chr10.49007401-49007600  
mytileDiff25p200.hyper\_CpG.Chr10.49007201-49007400  
mytileDiff25p200.hyper\_CpG.Chr10.49007401-49007600  
mytileDiff25p200.hyper\_CpG.Chr10.49304201-49304400  
mytileDiff25p200.hyper\_CpG.Chr10.49746201-49746400  
mytileDiff25p200.hyper\_CpG.Chr11.509001-509200  
mytileDiff25p200.hyper\_CpG.Chr11.952201-952400  
mytileDiff25p200.hyper\_CpG.Chr11.1749801-1750000  
mytileDiff25p200.hyper\_CpG.Chr11.1938601-1938800  
mytileDiff25p200.hyper\_CpG.Chr11.2751401-2751600  
mytileDiff25p200.hyper\_CpG.Chr11.3456001-3456200  
mytileDiff25p200.hyper\_CpG.Chr11.3569601-3569800  
mytileDiff25p200.hyper\_CpG.Chr11.4513401-4513600  
mytileDiff25p200.hyper\_CpG.Chr11.5663201-5663400  
mytileDiff25p200.hyper\_CpG.Chr11.5757601-5757800  
mytileDiff25p200.hyper\_CpG.Chr11.6095601-6095800  
mytileDiff25p200.hyper\_CpG.Chr11.8839601-8839800  
mytileDiff25p200.hyper\_CpG.Chr11.9500801-9501000  
mytileDiff25p200.hyper\_CpG.Chr11.10057001-10057200  
mytileDiff25p200.hyper\_CpG.Chr11.10302201-10302400  
mytileDiff25p200.hyper\_CpG.Chr11.14678001-14678200  
mytileDiff25p200.hyper\_CpG.Chr11.15068001-15068200  
mytileDiff25p200.hyper\_CpG.Chr11.18325401-18325600  
mytileDiff25p200.hyper\_CpG.Chr11.30386001-30386200  
mytileDiff25p200.hyper\_CpG.Chr11.31279401-31279600  
mytileDiff25p200.hyper\_CpG.Chr11.32937601-32937800  
mytileDiff25p200.hyper\_CpG.Chr12.83801-84000  
mytileDiff25p200.hyper\_CpG.Chr12.117601-117800  
mytileDiff25p200.hyper\_CpG.Chr12.1632001-1632200  
mytileDiff25p200.hyper\_CpG.Chr12.1983401-1983600

mytileDiff25p200.hyper\_CpG.Chr12.2108001-2108200  
mytileDiff25p200.hyper\_CpG.Chr12.3723801-3724000  
mytileDiff25p200.hyper\_CpG.Chr12.3793801-3794000  
mytileDiff25p200.hyper\_CpG.Chr12.3804401-3804600  
mytileDiff25p200.hyper\_CpG.Chr12.5379801-5380000  
mytileDiff25p200.hyper\_CpG.Chr12.7992001-7992200  
mytileDiff25p200.hyper\_CpG.Chr12.8969401-8969600  
mytileDiff25p200.hyper\_CpG.Chr12.9805801-9806000  
mytileDiff25p200.hyper\_CpG.Chr12.21950201-21950400  
mytileDiff25p200.hyper\_CpG.Chr12.23010801-23011000  
mytileDiff25p200.hyper\_CpG.Chr12.26061601-26061800  
mytileDiff25p200.hyper\_CpG.Chr12.34141201-34141400  
mytileDiff25p200.hyper\_CpG.Chr12.34913201-34913400  
mytileDiff25p200.hyper\_CpG.Chr12.35077801-35078000  
mytileDiff25p200.hyper\_CpG.Chr13.12629201-12629400  
mytileDiff25p200.hyper\_CpG.Chr13.14473601-14473800  
mytileDiff25p200.hyper\_CpG.Chr13.14772801-14773000  
mytileDiff25p200.hyper\_CpG.Chr13.15181001-15181200  
mytileDiff25p200.hyper\_CpG.Chr13.17660201-17660400  
mytileDiff25p200.hyper\_CpG.Chr13.18650201-18650400  
mytileDiff25p200.hyper\_CpG.Chr13.22169001-22169200  
mytileDiff25p200.hyper\_CpG.Chr13.23357401-23357600  
mytileDiff25p200.hyper\_CpG.Chr13.23721201-23721400  
mytileDiff25p200.hyper\_CpG.Chr13.24013401-24013600  
mytileDiff25p200.hyper\_CpG.Chr13.25169801-25170000  
mytileDiff25p200.hyper\_CpG.Chr13.25841001-25841200  
mytileDiff25p200.hyper\_CpG.Chr13.26278201-26278400  
mytileDiff25p200.hyper\_CpG.Chr13.26961401-26961600  
mytileDiff25p200.hyper\_CpG.Chr13.27878801-27879000  
mytileDiff25p200.hyper\_CpG.Chr13.32085201-32085400  
mytileDiff25p200.hyper\_CpG.Chr13.33424001-33424200  
mytileDiff25p200.hyper\_CpG.Chr13.33515001-33515200  
mytileDiff25p200.hyper\_CpG.Chr13.34822201-34822400  
mytileDiff25p200.hyper\_CpG.Chr13.35820201-35820400  
mytileDiff25p200.hyper\_CpG.Chr13.39609001-39609200  
mytileDiff25p200.hyper\_CpG.Chr13.41503001-41503200  
mytileDiff25p200.hyper\_CpG.Chr13.42959601-42959800  
mytileDiff25p200.hyper\_CpG.Chr13.43290801-43291000  
mytileDiff25p200.hyper\_CpG.Chr13.43439801-43440000  
mytileDiff25p200.hyper\_CpG.Chr13.43543801-43544000  
mytileDiff25p200.hyper\_CpG.Chr13.43720001-43720200

mytileDiff25p200.hyper\_CpG.Chr13.44095601-44095800  
mytileDiff25p200.hyper\_CpG.Chr13.44878201-44878400  
mytileDiff25p200.hyper\_CpG.Chr13.45200401-45200600  
mytileDiff25p200.hyper\_CpG.Chr14.602801-603000  
mytileDiff25p200.hyper\_CpG.Chr14.923401-923600  
mytileDiff25p200.hyper\_CpG.Chr14.5777401-5777600  
mytileDiff25p200.hyper\_CpG.Chr14.9235201-9235400  
mytileDiff25p200.hyper\_CpG.Chr14.18591001-18591200  
mytileDiff25p200.hyper\_CpG.Chr14.20437801-20438000  
mytileDiff25p200.hyper\_CpG.Chr14.23912601-23912800  
mytileDiff25p200.hyper\_CpG.Chr14.28667401-28667600  
mytileDiff25p200.hyper\_CpG.Chr14.31016201-31016400  
mytileDiff25p200.hyper\_CpG.Chr14.32277801-32278000  
mytileDiff25p200.hyper\_CpG.Chr14.32277801-32278000  
mytileDiff25p200.hyper\_CpG.Chr14.44553401-44553600  
mytileDiff25p200.hyper\_CpG.Chr14.44553401-44553600  
mytileDiff25p200.hyper\_CpG.Chr14.47539401-47539600  
mytileDiff25p200.hyper\_CpG.Chr15.1095201-1095400  
mytileDiff25p200.hyper\_CpG.Chr15.3745001-3745200  
mytileDiff25p200.hyper\_CpG.Chr15.5204201-5204400  
mytileDiff25p200.hyper\_CpG.Chr15.6502201-6502400  
mytileDiff25p200.hyper\_CpG.Chr15.6618001-6618200  
mytileDiff25p200.hyper\_CpG.Chr15.6985401-6985600  
mytileDiff25p200.hyper\_CpG.Chr15.7252601-7252800  
mytileDiff25p200.hyper\_CpG.Chr15.7353001-7353200  
mytileDiff25p200.hyper\_CpG.Chr15.7353001-7353200  
mytileDiff25p200.hyper\_CpG.Chr15.9089201-9089400  
mytileDiff25p200.hyper\_CpG.Chr15.10832401-10832600  
mytileDiff25p200.hyper\_CpG.Chr15.11482201-11482400  
mytileDiff25p200.hyper\_CpG.Chr15.11606401-11606600  
mytileDiff25p200.hyper\_CpG.Chr15.15661401-15661600  
mytileDiff25p200.hyper\_CpG.Chr15.16809401-16809600  
mytileDiff25p200.hyper\_CpG.Chr15.22381601-22381800  
mytileDiff25p200.hyper\_CpG.Chr15.43163801-43164000  
mytileDiff25p200.hyper\_CpG.Chr15.44306001-44306200  
mytileDiff25p200.hyper\_CpG.Chr15.48477801-48478000  
mytileDiff25p200.hyper\_CpG.Chr15.51346201-51346400  
mytileDiff25p200.hyper\_CpG.Chr16.311201-311400  
mytileDiff25p200.hyper\_CpG.Chr16.1631601-1631800  
mytileDiff25p200.hyper\_CpG.Chr16.2122201-2122400  
mytileDiff25p200.hyper\_CpG.Chr16.2534001-2534200

mytileDiff25p200.hyper\_CpG.Chr16.4060001-4060200  
mytileDiff25p200.hyper\_CpG.Chr16.6935201-6935400  
mytileDiff25p200.hyper\_CpG.Chr16.7079601-7079800  
mytileDiff25p200.hyper\_CpG.Chr16.7960801-7961000  
mytileDiff25p200.hyper\_CpG.Chr16.9200001-9200200  
mytileDiff25p200.hyper\_CpG.Chr16.14742201-14742400  
mytileDiff25p200.hyper\_CpG.Chr16.28770401-28770600  
mytileDiff25p200.hyper\_CpG.Chr16.28795401-28795600  
mytileDiff25p200.hyper\_CpG.Chr16.30418601-30418800  
mytileDiff25p200.hyper\_CpG.Chr16.33571601-33571800  
mytileDiff25p200.hyper\_CpG.Chr16.35546201-35546400  
mytileDiff25p200.hyper\_CpG.Chr16.35701401-35701600  
mytileDiff25p200.hyper\_CpG.Chr16.36935801-36936000  
mytileDiff25p200.hyper\_CpG.Chr17.600601-600800  
mytileDiff25p200.hyper\_CpG.Chr17.913201-913400  
mytileDiff25p200.hyper\_CpG.Chr17.1125801-1126000  
mytileDiff25p200.hyper\_CpG.Chr17.1136801-1137000  
mytileDiff25p200.hyper\_CpG.Chr17.1679401-1679600  
mytileDiff25p200.hyper\_CpG.Chr17.2347801-2348000  
mytileDiff25p200.hyper\_CpG.Chr17.2470201-2470400  
mytileDiff25p200.hyper\_CpG.Chr17.3518001-3518200  
mytileDiff25p200.hyper\_CpG.Chr17.3957001-3957200  
mytileDiff25p200.hyper\_CpG.Chr17.8455801-8456000  
mytileDiff25p200.hyper\_CpG.Chr17.9574801-9575000  
mytileDiff25p200.hyper\_CpG.Chr17.9630401-9630600  
mytileDiff25p200.hyper\_CpG.Chr17.9740201-9740400  
mytileDiff25p200.hyper\_CpG.Chr17.9787601-9787800  
mytileDiff25p200.hyper\_CpG.Chr17.11291401-11291600  
mytileDiff25p200.hyper\_CpG.Chr17.11863401-11863600  
mytileDiff25p200.hyper\_CpG.Chr17.12063801-12064000  
mytileDiff25p200.hyper\_CpG.Chr17.13375401-13375600  
mytileDiff25p200.hyper\_CpG.Chr17.14614401-14614600  
mytileDiff25p200.hyper\_CpG.Chr17.15231401-15231600  
mytileDiff25p200.hyper\_CpG.Chr17.33293401-33293600  
mytileDiff25p200.hyper\_CpG.Chr17.37300601-37300800  
mytileDiff25p200.hyper\_CpG.Chr17.37392401-37392600  
mytileDiff25p200.hyper\_CpG.Chr17.40126401-40126600  
mytileDiff25p200.hyper\_CpG.Chr17.40488401-40488600  
mytileDiff25p200.hyper\_CpG.Chr18.203601-203800  
mytileDiff25p200.hyper\_CpG.Chr18.1199401-1199600  
mytileDiff25p200.hyper\_CpG.Chr18.1339801-1340000

mytileDiff25p200.hyper\_CpG.Chr18.1581201-1581400  
mytileDiff25p200.hyper\_CpG.Chr18.3143201-3143400  
mytileDiff25p200.hyper\_CpG.Chr18.3327401-3327600  
mytileDiff25p200.hyper\_CpG.Chr18.3815401-3815600  
mytileDiff25p200.hyper\_CpG.Chr18.4157201-4157400  
mytileDiff25p200.hyper\_CpG.Chr18.5763401-5763600  
mytileDiff25p200.hyper\_CpG.Chr18.6260001-6260200  
mytileDiff25p200.hyper\_CpG.Chr18.8397801-8398000  
mytileDiff25p200.hyper\_CpG.Chr18.8397801-8398000  
mytileDiff25p200.hyper\_CpG.Chr18.8639801-8640000  
mytileDiff25p200.hyper\_CpG.Chr18.11960601-11960800  
mytileDiff25p200.hyper\_CpG.Chr18.19865201-19865400  
mytileDiff25p200.hyper\_CpG.Chr18.31582401-31582600  
mytileDiff25p200.hyper\_CpG.Chr18.33165601-33165800  
mytileDiff25p200.hyper\_CpG.Chr18.43616001-43616200  
mytileDiff25p200.hyper\_CpG.Chr18.43616001-43616200  
mytileDiff25p200.hyper\_CpG.Chr18.43689801-43690000  
mytileDiff25p200.hyper\_CpG.Chr18.44403001-44403200  
mytileDiff25p200.hyper\_CpG.Chr18.47410001-47410200  
mytileDiff25p200.hyper\_CpG.Chr18.50913801-50914000  
mytileDiff25p200.hyper\_CpG.Chr18.51168801-51169000  
mytileDiff25p200.hyper\_CpG.Chr18.51708201-51708400  
mytileDiff25p200.hyper\_CpG.Chr18.52129601-52129800  
mytileDiff25p200.hyper\_CpG.Chr18.53856001-53856200  
mytileDiff25p200.hyper\_CpG.Chr18.57572801-57573000  
mytileDiff25p200.hyper\_CpG.Chr19.2158001-2158200  
mytileDiff25p200.hyper\_CpG.Chr19.2406201-2406400  
mytileDiff25p200.hyper\_CpG.Chr19.3309201-3309400  
mytileDiff25p200.hyper\_CpG.Chr19.3606801-3607000  
mytileDiff25p200.hyper\_CpG.Chr19.4322001-4322200  
mytileDiff25p200.hyper\_CpG.Chr19.5542801-5543000  
mytileDiff25p200.hyper\_CpG.Chr19.5873001-5873200  
mytileDiff25p200.hyper\_CpG.Chr19.8730601-8730800  
mytileDiff25p200.hyper\_CpG.Chr19.26564401-26564600  
mytileDiff25p200.hyper\_CpG.Chr19.32428001-32428200  
mytileDiff25p200.hyper\_CpG.Chr19.35140601-35140800  
mytileDiff25p200.hyper\_CpG.Chr19.38418201-38418400  
mytileDiff25p200.hyper\_CpG.Chr19.43050601-43050800  
mytileDiff25p200.hyper\_CpG.Chr19.43050601-43050800  
mytileDiff25p200.hyper\_CpG.Chr19.43089401-43089600  
mytileDiff25p200.hyper\_CpG.Chr19.43540401-43540600

mytileDiff25p200.hyper\_CpG.Chr19.44246401-44246600  
mytileDiff25p200.hyper\_CpG.Chr19.44532201-44532400  
mytileDiff25p200.hyper\_CpG.Chr19.44907001-44907200  
mytileDiff25p200.hyper\_CpG.Chr19.44921001-44921200  
mytileDiff25p200.hyper\_CpG.Chr19.46053801-46054000  
mytileDiff25p200.hyper\_CpG.Chr19.46995601-46995800  
mytileDiff25p200.hyper\_CpG.Chr19.48033001-48033200  
mytileDiff25p200.hyper\_CpG.Chr19.48619801-48620000  
mytileDiff25p200.hyper\_CpG.Chr19.48791801-48792000  
mytileDiff25p200.hyper\_CpG.Chr19.50052401-50052600  
mytileDiff25p200.hyper\_CpG.Chr20.528601-528800  
mytileDiff25p200.hyper\_CpG.Chr20.528201-528400  
mytileDiff25p200.hyper\_CpG.Chr20.5352201-5352400  
mytileDiff25p200.hyper\_CpG.Chr20.32767201-32767400  
mytileDiff25p200.hyper\_CpG.Chr20.33650601-33650800  
mytileDiff25p200.hyper\_CpG.Chr20.34562801-34563000  
mytileDiff25p200.hyper\_CpG.Chr20.35329801-35330000  
mytileDiff25p200.hyper\_CpG.Chr20.36421401-36421600  
mytileDiff25p200.hyper\_CpG.Chr20.36902801-36903000  
mytileDiff25p200.hyper\_CpG.Chr20.37152801-37153000  
mytileDiff25p200.hyper\_CpG.Chr20.37190201-37190400  
mytileDiff25p200.hyper\_CpG.Chr20.37795201-37795400  
mytileDiff25p200.hyper\_CpG.Chr20.39961001-39961200  
mytileDiff25p200.hyper\_CpG.Chr20.40840801-40841000  
mytileDiff25p200.hyper\_CpG.Chr20.43088001-43088200  
mytileDiff25p200.hyper\_CpG.Chr20.47062801-47063000  
mytileDiff25p200.hyper\_CpG.Chr20.47320801-47321000

---



**genes in CpG context.**

| <b>REGION</b> | <b>GENE ID</b>  |
|---------------|-----------------|
| GENE BODY     | Glyma.01G004100 |
| PROMOTER      | Glyma.01G027100 |
| GENE BODY     | Glyma.01G028700 |
| GENE BODY     | Glyma.01G038000 |
| GENE BODY     | Glyma.01G045800 |
| GENE BODY     | Glyma.01G073400 |
| GENE BODY     | Glyma.01G074700 |
| GENE BODY     | Glyma.01G089100 |
| 3'UTR         | Glyma.01G112200 |
| GENE BODY     | Glyma.01G140200 |
| PROMOTER      | Glyma.01G140300 |
| GENE BODY     | Glyma.01G157600 |
| GENE BODY     | Glyma.01G168900 |
| 3'UTR         | Glyma.01G170000 |
| GENE BODY     | Glyma.01G172800 |
| GENE BODY     | Glyma.01G183500 |
| GENE BODY     | Glyma.01G188700 |
| GENE BODY     | Glyma.01G209800 |
| GENE BODY     | Glyma.01G245100 |
| GENE BODY     | Glyma.02G007900 |
| GENE BODY     | Glyma.02G008000 |
| GENE BODY     | Glyma.02G011800 |
| GENE BODY     | Glyma.02G014200 |
| GENE BODY     | Glyma.02G042400 |
| GENE BODY     | Glyma.02G055100 |
| GENE BODY     | Glyma.02G078600 |
| PROMOTER      | Glyma.02G080100 |
| PROMOTER      | Glyma.02G095000 |
| GENE BODY     | Glyma.02G097200 |
| GENE BODY     | Glyma.02G102600 |
| GENE BODY     | Glyma.02G107500 |
| GENE BODY     | Glyma.02G113300 |
| PROMOTER      | Glyma.02G127500 |
| GENE BODY     | Glyma.02G129000 |
| PROMOTER      | Glyma.02G131900 |
| GENE BODY     | Glyma.02G136800 |
| GENE BODY     | Glyma.02G182200 |
| GENE BODY     | Glyma.02G182400 |
| GENE BODY     | Glyma.02G211800 |

|                                 |                 |
|---------------------------------|-----------------|
| PROMOTER                        | Glyma.02G215200 |
| GENE BODY                       | Glyma.02G223600 |
| GENE BODY                       | Glyma.02G232900 |
| GENE BODY                       | Glyma.02G245200 |
| GENE BODY                       | Glyma.02G258100 |
| GENE BODY                       | Glyma.02G301500 |
| GENE BODY                       | Glyma.03G002700 |
| GENE BODY                       | Glyma.03G004900 |
| GENE BODY                       | Glyma.03G013000 |
| GENE BODY                       | Glyma.03G021900 |
| PROMOTER                        | Glyma.03G023000 |
| 3'UTR                           | Glyma.03G064400 |
| GENE BODY                       | Glyma.03G103900 |
| GENE BODY                       | Glyma.03G132000 |
| 5'UTR                           | Glyma.03G133900 |
| GENE BODY                       | Glyma.03G140100 |
| GENE BODY                       | Glyma.03G151200 |
| GENE BODY                       | Glyma.03G168700 |
| GENE BODY                       | Glyma.03G193300 |
| GENE BODY                       | Glyma.03G219500 |
| GENE BODY                       | Glyma.03G229400 |
| GENE BODY                       | Glyma.03G243400 |
| GENE BODY                       | Glyma.03G243700 |
| GENE BODY                       | Glyma.03G250400 |
| GENE BODY                       | Glyma.03G256300 |
| GENE BODY                       | Glyma.04G005800 |
| GENE BODY                       | Glyma.04G014400 |
| GENE BODY                       | Glyma.04G031600 |
| GENE BODY                       | Glyma.04G041900 |
| GENE BODY                       | Glyma.04G044200 |
| GENE BODY                       | Glyma.04G057200 |
| PROMOTER                        | Glyma.04G062100 |
| GENE BODY                       | Glyma.04G075900 |
| 5'UTR (104bp); GENE BODY (96bp) | Glyma.04G092900 |
| GENE BODY                       | Glyma.04G093000 |
| GENE BODY                       | Glyma.04G094100 |
| GENE BODY                       | Glyma.04G094400 |
| PROMOTER (187bp); 5'UTR (13bp)  | Glyma.04G132900 |
| GENE BODY                       | Glyma.04G135300 |
| GENE BODY                       | Glyma.04G192600 |
| GENE BODY                       | Glyma.04G201400 |

|                                 |                 |
|---------------------------------|-----------------|
| GENE BODY                       | Glyma.04G207200 |
| GENE BODY                       | Glyma.04G221900 |
| GENE BODY                       | Glyma.04G221900 |
| PROMOTER                        | Glyma.04G232100 |
| GENE BODY                       | Glyma.04G236900 |
| GENE BODY                       | Glyma.04G237100 |
| GENE BODY                       | Glyma.04G253400 |
| GENE BODY                       | Glyma.04G257000 |
| GENE BODY                       | Glyma.05G006000 |
| PROMOTER                        | Glyma.05G029500 |
| PROMOTER                        | Glyma.05G046400 |
| GENE BODY                       | Glyma.05G060200 |
| GENE BODY                       | Glyma.05G062300 |
| GENE BODY                       | Glyma.05G073400 |
| GENE BODY                       | Glyma.05G084600 |
| GENE BODY                       | Glyma.05G084600 |
| GENE BODY                       | Glyma.05G105000 |
| GENE BODY                       | Glyma.05G111000 |
| GENE BODY                       | Glyma.05G117000 |
| GENE BODY                       | Glyma.05G131500 |
| GENE BODY                       | Glyma.05G197500 |
| GENE BODY                       | Glyma.05G215400 |
| GENE BODY                       | Glyma.05G219000 |
| GENE BODY                       | Glyma.05G223100 |
| PROMOTER                        | Glyma.05G223100 |
| GENE BODY                       | Glyma.06G001600 |
| GENE BODY                       | Glyma.06G046000 |
| PROMOTER                        | Glyma.06G046100 |
| GENE BODY                       | Glyma.06G072200 |
| GENE BODY                       | Glyma.06G097900 |
| GENE BODY                       | Glyma.06G098900 |
| GENE BODY                       | Glyma.06G140200 |
| GENE BODY (147bp); 3'UTR (53bp) | Glyma.06G141300 |
| GENE BODY                       | Glyma.06G174400 |
| GENE BODY                       | Glyma.06G192000 |
| GENE BODY                       | Glyma.06G214100 |
| GENE BODY                       | Glyma.06G216700 |
| GENE BODY                       | Glyma.06G258100 |
| GENE BODY                       | Glyma.06G262600 |
| GENE BODY                       | Glyma.06G286700 |
| GENE BODY                       | Glyma.06G292200 |

|                                 |                 |
|---------------------------------|-----------------|
| GENE BODY                       | Glyma.06G305000 |
| GENE BODY                       | Glyma.06G321400 |
| GENE BODY                       | Glyma.06G322700 |
| GENE BODY                       | Glyma.06G324800 |
| GENE BODY                       | Glyma.07G004000 |
| GENE BODY                       | Glyma.07G013800 |
| GENE BODY                       | Glyma.07G014200 |
| GENE BODY                       | Glyma.07G026300 |
| GENE BODY                       | Glyma.07G047100 |
| GENE BODY                       | Glyma.07G059900 |
| PROMOTER                        | Glyma.07G098200 |
| GENE BODY                       | Glyma.07G104700 |
| GENE BODY                       | Glyma.07G114400 |
| GENE BODY                       | Glyma.07G122000 |
| GENE BODY                       | Glyma.07G137300 |
| GENE BODY                       | Glyma.07G150700 |
| GENE BODY                       | Glyma.07G157400 |
| GENE BODY                       | Glyma.07G171600 |
| GENE BODY                       | Glyma.07G172400 |
| 5'UTR (101bp); GENE BODY (99bp) | Glyma.07G188600 |
| GENE BODY                       | Glyma.07G245900 |
| GENE BODY                       | Glyma.07G256500 |
| GENE BODY                       | Glyma.07G259500 |
| 3'UTR                           | Glyma.08G022100 |
| GENE BODY                       | Glyma.08G033500 |
| GENE BODY                       | Glyma.08G077800 |
| GENE BODY                       | Glyma.08G082600 |
| GENE BODY                       | Glyma.08G084400 |
| GENE BODY                       | Glyma.08G096300 |
| GENE BODY                       | Glyma.08G109400 |
| GENE BODY                       | Glyma.08G114600 |
| GENE BODY                       | Glyma.08G126200 |
| GENE BODY                       | Glyma.08G134600 |
| GENE BODY                       | Glyma.08G138800 |
| GENE BODY                       | Glyma.08G162300 |
| GENE BODY                       | Glyma.08G176800 |
| GENE BODY                       | Glyma.08G193600 |
| GENE BODY                       | Glyma.08G193700 |
| GENE BODY                       | Glyma.08G248800 |
| GENE BODY                       | Glyma.08G252600 |
| GENE BODY                       | Glyma.08G263100 |

|                                 |                 |
|---------------------------------|-----------------|
| GENE BODY                       | Glyma.08G279300 |
| GENE BODY                       | Glyma.08G285000 |
| GENE BODY                       | Glyma.08G322700 |
| GENE BODY (155bp); 3'UTR (45bp) | Glyma.08G356300 |
| GENE BODY                       | Glyma.09G013400 |
| GENE BODY                       | Glyma.09G021200 |
| GENE BODY                       | Glyma.09G023300 |
| GENE BODY                       | Glyma.09G024700 |
| GENE BODY                       | Glyma.09G024800 |
| GENE BODY                       | Glyma.09G028600 |
| GENE BODY                       | Glyma.09G063400 |
| GENE BODY (158bp); 3'UTR (42bp) | Glyma.09G081800 |
| GENE BODY                       | Glyma.09G086600 |
| GENE BODY                       | Glyma.09G131700 |
| GENE BODY                       | Glyma.09G154100 |
| GENE BODY                       | Glyma.09G155200 |
| GENE BODY                       | Glyma.09G177600 |
| GENE BODY                       | Glyma.09G182600 |
| GENE BODY                       | Glyma.09G188100 |
| GENE BODY                       | Glyma.09G188300 |
| GENE BODY                       | Glyma.09G194400 |
| PROMOTER                        | Glyma.09G217700 |
| GENE BODY                       | Glyma.09G247600 |
| GENE BODY                       | Glyma.09G248800 |
| GENE BODY                       | Glyma.09G253700 |
| GENE BODY                       | Glyma.09G267400 |
| GENE BODY                       | Glyma.09G282500 |
| GENE BODY                       | Glyma.09G286500 |
| GENE BODY                       | Glyma.10G028000 |
| GENE BODY                       | Glyma.10G029000 |
| GENE BODY                       | Glyma.10G058500 |
| GENE BODY                       | Glyma.10G067400 |
| GENE BODY                       | Glyma.10G104300 |
| GENE BODY                       | Glyma.10G106500 |
| PROMOTER                        | Glyma.10G112600 |
| PROMOTER                        | Glyma.10G112700 |
| GENE BODY                       | Glyma.10G117200 |
| GENE BODY                       | Glyma.10G132600 |
| GENE BODY                       | Glyma.10G142800 |
| GENE BODY                       | Glyma.10G150000 |
| GENE BODY                       | Glyma.10G155100 |

|                                    |                 |
|------------------------------------|-----------------|
| GENE BODY                          | Glyma.10G155800 |
| GENE BODY                          | Glyma.10G160500 |
| PROMOTER                           | Glyma.10G180400 |
| GENE BODY                          | Glyma.10G181400 |
| GENE BODY                          | Glyma.10G182000 |
| GENE BODY                          | Glyma.10G205500 |
| GENE BODY                          | Glyma.10G214100 |
| GENE BODY                          | Glyma.10G222900 |
| GENE BODY                          | Glyma.10G250500 |
| GENE BODY                          | Glyma.10G250800 |
| 5'UTR                              | Glyma.10G266600 |
| GENE BODY (174bp); 3'UTR (26bp)    | Glyma.10G266600 |
| 5' UTR (19); GENE_BODY (181)       | Glyma.10G266800 |
| GENE BODY (68bp); 3'UTR (26 bp)    | Glyma.10G266800 |
| GENE BODY                          | Glyma.10G270800 |
| GENE BODY                          | Glyma.10G274500 |
| GENE BODY                          | Glyma.11G007200 |
| GENE BODY                          | Glyma.11G013900 |
| GENE BODY                          | Glyma.11G024700 |
| GENE BODY                          | Glyma.11G027000 |
| GENE BODY (44bp); 3'UTR (156bp)    | Glyma.11G038500 |
| GENE BODY                          | Glyma.11G046100 |
| GENE BODY                          | Glyma.11G047800 |
| GENE BODY                          | Glyma.11G059600 |
| GENE BODY                          | Glyma.11G075600 |
| GENE BODY                          | Glyma.11G077000 |
| GENE BODY                          | Glyma.11G081200 |
| PROMOTER (170bp); GENE BODY (30bp) | Glyma.11G115900 |
| GENE BODY                          | Glyma.11G125100 |
| GENE BODY                          | Glyma.11G131600 |
| GENE BODY                          | Glyma.11G135300 |
| PROMOTER (134bp); GENE BODY (66bp) | Glyma.11G160300 |
| PROMOTER                           | Glyma.11G162300 |
| GENE BODY                          | Glyma.11G170700 |
| GENE BODY                          | Glyma.11G211200 |
| GENE BODY                          | Glyma.11G218000 |
| 3'UTR                              | Glyma.11G234200 |
| GENE BODY                          | Glyma.12G001100 |
| GENE BODY                          | Glyma.12G001400 |
| 5'UTR (95bp); GENE BODY (105bp)    | Glyma.12G022400 |
| GENE BODY                          | Glyma.12G027400 |

|                                    |                 |
|------------------------------------|-----------------|
| PROMOTER                           | Glyma.12G028200 |
| GENE BODY                          | Glyma.12G052000 |
| GENE BODY                          | Glyma.12G052700 |
| GENE BODY                          | Glyma.12G052800 |
| GENE BODY                          | Glyma.12G072900 |
| GENE BODY                          | Glyma.12G095300 |
| GENE BODY                          | Glyma.12G101500 |
| GENE BODY                          | Glyma.12G107000 |
| GENE BODY                          | Glyma.12G151500 |
| PROMOTER                           | Glyma.12G152500 |
| GENE BODY                          | Glyma.12G157700 |
| GENE BODY                          | Glyma.12G180800 |
| GENE BODY                          | Glyma.12G188100 |
| GENE BODY                          | Glyma.12G189100 |
| GENE BODY                          | Glyma.13G040300 |
| GENE BODY                          | Glyma.13G048900 |
| GENE BODY                          | Glyma.13G051300 |
| GENE BODY (76bp); 3'UTR (124bp)    | Glyma.13G054500 |
| GENE BODY                          | Glyma.13G073900 |
| GENE BODY                          | Glyma.13G080100 |
| GENE BODY                          | Glyma.13G107100 |
| GENE BODY                          | Glyma.13G120800 |
| GENE BODY                          | Glyma.13G124000 |
| GENE BODY (145bp); 3'UTR (55bp)    | Glyma.13G127100 |
| PROMOTER (145bp); 5'UTR (55bp)     | Glyma.13G139100 |
| GENE BODY (166bp); 3'UTR (34bp)    | Glyma.13G145400 |
| GENE BODY                          | Glyma.13G149200 |
| GENE BODY                          | Glyma.13G154200 |
| GENE BODY                          | Glyma.13G163500 |
| GENE BODY                          | Glyma.13G207200 |
| GENE BODY                          | Glyma.13G221200 |
| PROMOTER                           | Glyma.13G222200 |
| GENE BODY                          | Glyma.13G238000 |
| 5'UTR (14bp); GENE BODY (186bp)    | Glyma.13G250900 |
| GENE BODY                          | Glyma.13G297200 |
| PROMOTER (167bp); GENE BODY (33bp) | Glyma.13G320700 |
| GENE BODY                          | Glyma.13G336200 |
| GENE BODY                          | Glyma.13G341000 |
| GENE BODY                          | Glyma.13G342900 |
| GENE BODY (155bp); 3'UTR (45bp)    | Glyma.13G344400 |
| GENE BODY                          | Glyma.13G346900 |

|                                 |                 |
|---------------------------------|-----------------|
| GENE BODY                       | Glyma.13G351800 |
| GENE BODY                       | Glyma.13G362000 |
| GENE BODY                       | Glyma.13G366100 |
| GENE BODY                       | Glyma.14G007700 |
| GENE BODY                       | Glyma.14G012200 |
| GENE BODY                       | Glyma.14G068900 |
| GENE BODY                       | Glyma.14G097800 |
| GENE BODY                       | Glyma.14G123700 |
| GENE BODY (44bp); 3'UTR (156bp) | Glyma.14G127700 |
| 5'UTR (89bp); GENE BODY (111bp) | Glyma.14G135900 |
| GENE BODY                       | Glyma.14G142300 |
| GENE BODY                       | Glyma.14G146200 |
| GENE BODY                       | Glyma.14G149700 |
| 3'UTR                           | Glyma.14G149800 |
| GENE BODY                       | Glyma.14G182400 |
| GENE BODY                       | Glyma.14G182500 |
| GENE BODY (153bp); 3'UTR (47bp) | Glyma.14G210200 |
| GENE BODY                       | Glyma.15G013500 |
| GENE BODY                       | Glyma.15G047100 |
| GENE BODY                       | Glyma.15G068100 |
| GENE BODY (177bp); 3'UTR (23bp) | Glyma.15G084700 |
| GENE BODY                       | Glyma.15G086200 |
| GENE BODY                       | Glyma.15G091000 |
| GENE BODY                       | Glyma.15G093600 |
| GENE BODY (189bp);3'UTR (11bp)  | Glyma.15G094500 |
| 3'UTR                           | Glyma.15G094600 |
| GENE BODY                       | Glyma.15G115500 |
| GENE BODY                       | Glyma.15G134800 |
| GENE BODY (181bp); 5'UTR (19bp) | Glyma.15G140300 |
| PROMOTER                        | Glyma.15G142000 |
| GENE BODY                       | Glyma.15G171400 |
| GENE BODY                       | Glyma.15G177000 |
| GENE BODY                       | Glyma.15G195700 |
| GENE BODY                       | Glyma.15G230500 |
| GENE BODY                       | Glyma.15G235500 |
| GENE BODY                       | Glyma.15G255300 |
| GENE BODY                       | Glyma.15G275000 |
| GENE BODY                       | Glyma.16G004800 |
| GENE BODY                       | Glyma.16G018400 |
| GENE BODY                       | Glyma.16G022600 |
| GENE BODY                       | Glyma.16G026000 |



|                                 |                 |
|---------------------------------|-----------------|
| GENE BODY                       | Glyma.16G043300 |
| 5'UTR (145bp); GENE BODY (55bp) | Glyma.16G069400 |
| GENE BODY                       | Glyma.16G070900 |
| GENE BODY                       | Glyma.16G077500 |
| GENE BODY                       | Glyma.16G082400 |
| GENE BODY                       | Glyma.16G092500 |
| GENE BODY                       | Glyma.16G131900 |
| GENE BODY                       | Glyma.16G131900 |
| PROMOTER (7bp); 5'UTR (193bp)   | Glyma.16G144000 |
| GENE BODY                       | Glyma.16G174700 |
| GENE BODY                       | Glyma.16G193200 |
| 3'UTR                           | Glyma.16G195300 |
| GENE BODY                       | Glyma.16G210200 |
| GENE BODY                       | Glyma.17G006600 |
| GENE BODY                       | Glyma.17G011500 |
| GENE BODY                       | Glyma.17G015000 |
| GENE BODY                       | Glyma.17G015200 |
| GENE BODY (140bp); 3'UTR (60bp) | Glyma.17G022900 |
| GENE BODY                       | Glyma.17G031900 |
| GENE BODY (190bp); 3'UTR (10bp) | Glyma.17G033700 |
| GENE BODY                       | Glyma.17G046900 |
| GENE BODY                       | Glyma.17G052100 |
| GENE BODY                       | Glyma.17G107600 |
| 5'UTR (6); GENE BODY (194)      | Glyma.17G120400 |
| GENE BODY                       | Glyma.17G120900 |
| GENE BODY                       | Glyma.17G121700 |
| GENE BODY                       | Glyma.17G122300 |
| GENE BODY                       | Glyma.17G139100 |
| GENE BODY                       | Glyma.17G145000 |
| GENE BODY                       | Glyma.17G146400 |
| GENE BODY                       | Glyma.17G157100 |
| GENE BODY                       | Glyma.17G163700 |
| 5'UTR (58bp); GENE BODY (142bp) | Glyma.17G166700 |
| 3'UTR                           | Glyma.17G204900 |
| GENE BODY                       | Glyma.17G220800 |
| PROMOTER                        | Glyma.17G221300 |
| GENE BODY                       | Glyma.17G245800 |
| GENE BODY                       | Glyma.17G249900 |
| GENE BODY                       | Glyma.18G002400 |
| 5'UTR                           | Glyma.18G016800 |
| GENE BODY                       | Glyma.18G018300 |

|                                    |                 |
|------------------------------------|-----------------|
| GENE BODY                          | Glyma.18G021500 |
| GENE BODY                          | Glyma.18G039000 |
| GENE BODY                          | Glyma.18G040400 |
| GENE BODY                          | Glyma.18G044200 |
| PROMOTER                           | Glyma.18G047900 |
| GENE BODY                          | Glyma.18G063000 |
| GENE BODY                          | Glyma.18G067400 |
| GENE BODY                          | Glyma.18G085100 |
| GENE BODY                          | Glyma.18G085200 |
| GENE BODY (52bp); 5'UTR (148bp)    | Glyma.18G087100 |
| GENE BODY                          | Glyma.18G106800 |
| GENE BODY                          | Glyma.18G136200 |
| GENE BODY                          | Glyma.18G154700 |
| GENE BODY                          | Glyma.18G155200 |
| GENE BODY                          | Glyma.18G181300 |
| PROMOTER                           | Glyma.18G181400 |
| GENE BODY                          | Glyma.18G181500 |
| GENE BODY                          | Glyma.18G184400 |
| GENE BODY (173bp); 3'UTR (27bp)    | Glyma.18G197600 |
| GENE BODY                          | Glyma.18G222100 |
| GENE BODY                          | Glyma.18G224000 |
| GENE BODY                          | Glyma.18G228000 |
| GENE BODY                          | Glyma.18G232900 |
| GENE BODY                          | Glyma.18G251900 |
| GENE BODY                          | Glyma.18G298100 |
| GENE BODY                          | Glyma.19G020200 |
| GENE BODY                          | Glyma.19G021700 |
| GENE BODY                          | Glyma.19G026600 |
| GENE BODY                          | Glyma.19G029100 |
| GENE BODY                          | Glyma.19G033500 |
| GENE BODY                          | Glyma.19G039100 |
| GENE BODY                          | Glyma.19G040800 |
| GENE BODY                          | Glyma.19G053500 |
| GENE BODY                          | Glyma.19G073600 |
| PROMOTER                           | Glyma.19G091700 |
| GENE BODY                          | Glyma.19G103200 |
| GENE BODY                          | Glyma.19G125800 |
| PROMOTER                           | Glyma.19G169700 |
| PROMOTER (51bp); GENE BODY (149bp) | Glyma.19G169800 |
| GENE BODY                          | Glyma.19G170200 |
| GENE BODY                          | Glyma.19G175400 |

|                                    |                 |
|------------------------------------|-----------------|
| PROMOTER (162bp); GENE BODY (38bp) | Glyma.19G184000 |
| GENE BODY                          | Glyma.19G186900 |
| GENE BODY                          | Glyma.19G191800 |
| GENE BODY                          | Glyma.19G191900 |
| 3'UTR                              | Glyma.19G204200 |
| 5'UTR                              | Glyma.19G217200 |
| GENE BODY                          | Glyma.19G229200 |
| GENE BODY                          | Glyma.19G237000 |
| GENE BODY                          | Glyma.19G239700 |
| GENE BODY                          | Glyma.19G256500 |
| GENE BODY                          | Glyma.20G005400 |
| GENE BODY                          | Glyma.20G005400 |
| GENE BODY                          | Glyma.20G036600 |
| GENE BODY                          | Glyma.20G087700 |
| GENE BODY                          | Glyma.20G093200 |
| GENE BODY                          | Glyma.20G102800 |
| GENE BODY                          | Glyma.20G111200 |
| GENE BODY                          | Glyma.20G121600 |
| 3'UTR (151bp); GENE BODY (49bp)    | Glyma.20G126800 |
| GENE BODY                          | Glyma.20G130800 |
| PROMOTER                           | Glyma.20G131200 |
| GENE BODY                          | Glyma.20G138600 |
| GENE BODY                          | Glyma.20G161800 |
| GENE BODY                          | Glyma.20G170500 |
| GENE BODY                          | Glyma.20G192200 |
| GENE BODY                          | Glyma.20G239100 |
| GENE BODY                          | Glyma.20G242400 |

---

| GENE ANNOTATION                                         | % Methylation | Diffe q value |
|---------------------------------------------------------|---------------|---------------|
| Regulator of Vps4 activity in the MVB pathway proteir   | 59.97067449   | 0.00460124    |
| protein kinase family protein / peptidoglycan-binding   | 100           | 2.6925E-08    |
| NSP-interacting kinase 3                                | 100           | 3.38582E-06   |
| pyruvate dehydrogenase complex E1 alpha subunit         | 100           | 0.000703795   |
| peroxisomal adenine nucleotide carrier 1                | 53.65853659   | 0.002540759   |
| SNF2 domain-containing protein / helicase domain-co     | 50.71428571   | 0.001320947   |
| Nucleoporin autopeptidase                               | 100           | 0.000115391   |
| Family of unknown function (DUF572)                     | 86.66666667   | 0.008526819   |
| Disease resistance protein (TIR-NBS-LRR class) family   | 25.70010973   | 7.82947E-08   |
| arginase                                                | 100           | 0.005353107   |
| SLOW GROWTH 1                                           | 100           | 0.005353107   |
| N/A                                                     | 46.2962963    | 0.005823103   |
| DNA binding;zinc ion binding;nucleic acid binding;nucl  | 75.91836735   | 2.4749E-05    |
| Cytochrome P450 superfamily protein                     | 30.5785124    | 0.002048788   |
| NmrA-like negative transcriptional regulator family pr  | 67.79661017   | 2.79341E-06   |
| Protein kinase superfamily protein                      | 69.57328386   | 0.006793816   |
| RNA-binding (RRM/RBD/RNP motifs) family protein         | 44.44444444   | 0.004287198   |
| DNAJ heat shock N-terminal domain-containing protei     | 90.90909091   | 1.40706E-05   |
| histone deacetylase 1                                   | 100           | 1.13095E-05   |
| germin-like protein 10                                  | 37.25490196   | 8.05292E-08   |
| ATP binding cassette subfamily B4                       | 81.81818182   | 0.001920592   |
| nuclear encoded CLP protease 5                          | 63.26530612   | 0.001455847   |
| CTP synthase family protein                             | 100           | 0.001240448   |
| Calcium-dependent phosphotriesterase superfamily p      | 33.33333333   | 0.001021467   |
| Chaperone DnaJ-domain superfamily protein               | 57.44680851   | 0.001337013   |
| NAD(P)-binding Rossmann-fold superfamily protein        | 50            | 0.009463526   |
| Protein Transporter, Pam16                              | 27.97131148   | 0.008193419   |
| ribosomal protein L23AB                                 | 90            | 5.18275E-05   |
| dihydrosphingosine phosphate lyase                      | 85.71428571   | 0.004907369   |
| Protein kinase superfamily protein                      | 51.2195122    | 0.000310115   |
| RING/FYVE/PHD zinc finger superfamily protein           | 27.53623188   | 0.002670807   |
| Plant protein of unknown function (DUF863)              | 94.73684211   | 0.000566467   |
| glutamine synthetase 1;4                                | 55.74712644   | 0.004907369   |
| ARM repeat superfamily protein                          | 76            | 0.004550831   |
| fucosyltransferase 11                                   | 37.70177839   | 5.09444E-06   |
| Phox-associated domain;Phox-like;Sorting nexin, C-ter   | 29.10605847   | 3.23379E-05   |
| curculin-like (mannose-binding) lectin family protein / | 48.38709677   | 0.001192665   |
| guanylate kinase                                        | 44.28571429   | 0.005131118   |
| auxin F-box protein 5                                   | 100           | 0.001933999   |

|                                                           |             |             |
|-----------------------------------------------------------|-------------|-------------|
| Restriction endonuclease, type II-like superfamily prot   | 41.91561845 | 2.53603E-13 |
| RING/U-box superfamily protein                            | 67.3951049  | 0.00422635  |
| HEAT/U-box domain-containing protein                      | 97.77777778 | 2.56349E-09 |
| Protein of unknown function, DUF593                       | 36.81427627 | 0.00139898  |
| E3 ubiquitin ligase, putative                             | 88.88888889 | 0.000299513 |
| Sucrase/ferredoxin-like family protein                    | 36.92307692 | 0.005115318 |
| S-locus lectin protein kinase family protein              | 46.96969697 | 1.14187E-08 |
| ENTH/VHS family protein                                   | 54.16666667 | 0.000424206 |
| RNAhelicase-like 8                                        | 100         | 1.41839E-07 |
| growth-regulating factor 9                                | 70.90909091 | 0.004876312 |
| LOB domain-containing protein 18                          | 47.45762712 | 0.000581895 |
| GPI transamidase component Gpi16 subunit family pr        | 86.20689655 | 7.97829E-06 |
| Vacuolar sorting protein 39                               | 100         | 3.22217E-05 |
| P-loop containing nucleoside triphosphate hydrolases      | 70          | 0.005646129 |
| N/A                                                       | 100         | 0.001240448 |
| NIMA-related kinase 5                                     | 55.3030303  | 3.94734E-05 |
| debranching enzyme 1                                      | 64.70588235 | 0.000501408 |
| GroES-like zinc-binding dehydrogenase family protein      | 100         | 2.39209E-05 |
| Basic-leucine zipper (bZIP) transcription factor family p | 47.22222222 | 0.004284865 |
| Prolyl oligopeptidase family protein                      | 100         | 0.001933999 |
| glucose-6-phosphate dehydrogenase 4                       | 100         | 0.005353107 |
| ARM repeat superfamily protein                            | 39.05187835 | 0.00460124  |
| Esterase/lipase/thioesterase family protein               | 86.66666667 | 0.003440723 |
| Ankyrin repeat family protein                             | 88.75       | 7.33139E-05 |
| Protein of unknown function (DUF3133)                     | 73.33333333 | 0.005282421 |
| ER lumen protein retaining receptor family protein        | 30.43478261 | 0.00319357  |
| switch subunit 3                                          | 41.61573213 | 0.002243341 |
| DNA glycosylase superfamily protein                       | 38.33333333 | 0.00112567  |
| Protein of unknown function (DUF3223)                     | 61.11111111 | 0.000713436 |
| glycine-rich protein                                      | 39.3764063  | 0.003161348 |
| CTC-interacting domain 7                                  | 97.14285714 | 2.92739E-06 |
| Pentatricopeptide repeat (PPR) superfamily protein        | 51.31578947 | 0.003175057 |
| Peptidyl-tRNA hydrolase II (PTH2) family protein          | 90.90909091 | 0.004921546 |
| sequence-specific DNA binding transcription factors;tr    | 52.10803689 | 0.008172975 |
| conserved peptide upstream open reading frame 37          | 52.10803689 | 0.008172975 |
| O-fucosyltransferase family protein                       | 95.65217391 | 0.00016351  |
| P-loop containing nucleoside triphosphate hydrolases      | 100         | 3.88087E-07 |
| Ribosomal protein S19e family protein                     | 100         | 0.000703795 |
| Thioredoxin z                                             | 67.56756757 | 0.005375249 |
| Galactose oxidase/kelch repeat superfamily protein        | 77.14285714 | 0.006403301 |
| DCD (Development and Cell Death) domain protein           | 100         | 0.001933999 |

|                                                                                |             |             |
|--------------------------------------------------------------------------------|-------------|-------------|
| N/A                                                                            | 100         | 6.22335E-07 |
| ribonuclease II family protein                                                 | 90          | 0.008505711 |
| ribonuclease II family protein                                                 | 36.0673847  | 0.000606269 |
| P-loop containing nucleoside triphosphate hydrolases                           | 26.46587061 | 0.001970548 |
| NADH-dependent glutamate synthase 1                                            | 44.23076923 | 0.00286027  |
| Protein of unknown function (DUF668)                                           | 80.90909091 | 0.007896428 |
| Protein of unknown function (DUF1644)                                          | 25.95866256 | 1.72831E-07 |
| Smg-4/UPF3 family protein                                                      | 59.46428571 | 3.93888E-06 |
| ADP-ribosylation factor A1B                                                    | 34.14634146 | 0.006270513 |
| HSP20-like chaperones superfamily protein                                      | 100         | 0.000534009 |
| homolog of nucleolar protein NOP56                                             | 28.191246   | 6.41886E-05 |
| O-fucosyltransferase family protein                                            | 100         | 0.000534009 |
| myb-like transcription factor family protein                                   | 91.66666667 | 9.72954E-05 |
| N/A                                                                            | 86.36363636 | 0.001058832 |
| N/A                                                                            | 41.17406487 | 6.64903E-17 |
| N/A                                                                            | 36.91548692 | 5.906E-10   |
| Phototropic-responsive NPH3 family protein                                     | 42.64705882 | 0.009486365 |
| N/A                                                                            | 85.71428571 | 0.003645592 |
| Calmodulin-binding transcription activator protein with chromatin remodeling 4 | 93.33333333 | 2.45968E-10 |
|                                                                                | 64.2962963  | 0.000753828 |
| ENTH/VHS/GAT family protein                                                    | 95.45454545 | 2.14973E-05 |
| TRICHOME BIREFRINGENCE-LIKE 23Methylated_Regio                                 | 100         | 1.85987E-10 |
| Tetratricopeptide repeat (TPR)-like superfamily protein                        | 52.94117647 | 0.006971016 |
| Mitochondrial ATP synthase subunit G protein                                   | 86.66666667 | 0.008526819 |
| Mitochondrial ATP synthase subunit G protein                                   | 90          | 0.000188727 |
| RNA polymerase sigma subunit 2                                                 | 64.58333333 | 0.007936784 |
| autoinhibited Ca <sup>2+</sup> -ATPase 1                                       | 66.66666667 | 0.004711596 |
| N/A                                                                            | 66.66666667 | 0.004711596 |
| LisH dimerisation motif;WD40/YVTN repeat-like-containing                       | 93.10344828 | 0.000147771 |
| GATA-type zinc finger protein with TIFY domain                                 | 28.52408308 | 0.00256575  |
| phosphoenolpyruvate carboxylase-related kinase 2                               | 25.32994428 | 0.001563456 |
| alpha/beta-Hydrolases superfamily protein                                      | 87.5        | 0.005934657 |
| N/A                                                                            | 54.16666667 | 7.19661E-05 |
| Peptidase C78, ubiquitin fold modifier-specific peptidase                      | 100         | 0.001933999 |
| Protein Transporter, Pam16                                                     | 58          | 0.001418149 |
| N/A                                                                            | 100         | 0.000163436 |
| nudix hydrolase homolog 19                                                     | 64.28571429 | 0.00397489  |
| S-locus lectin protein kinase family protein                                   | 54.05405405 | 9.65375E-05 |
| S-locus lectin protein kinase family protein                                   | 48.03921569 | 4.40126E-05 |
| O-methyltransferase family protein                                             | 28.7049732  | 4.50083E-07 |
| Protein kinase superfamily protein                                             | 62.16216216 | 2.58813E-05 |

|                                                       |             |             |
|-------------------------------------------------------|-------------|-------------|
| glutamate receptor 3.4                                | 90          | 0.004165018 |
| WPP domain interacting protein 1                      | 32.88299935 | 5.92326E-06 |
| SNARE-like superfamily protein                        | 46.55172414 | 0.003404756 |
| O-fucosyltransferase family protein                   | 92.30769231 | 0.001904087 |
| exocyst subunit exo70 family protein G1               | 42.37891738 | 0.000137185 |
| glucose-6-phosphate dehydrogenase 1                   | 100         | 0.000277356 |
| actin binding protein family                          | 90          | 4.31948E-05 |
| NAD(P)-binding Rossmann-fold superfamily protein      | 40.15151515 | 0.001323216 |
| Calcineurin-like metallo-phosphoesterase superfamily  | 78.66666667 | 3.79056E-05 |
| ribosomal protein L5 B                                | 100         | 0.001933999 |
| Copper transport protein family                       | 30          | 1.88168E-05 |
| NF-X-like 1                                           | 66.46766169 | 0.001753712 |
| Protein kinase superfamily protein                    | 77.01149425 | 0.001735936 |
| Phosphoribosyltransferase family protein              | 54.54545455 | 0.005925316 |
| delta 1-pyrroline-5-carboxylate synthase 2            | 65.43478261 | 0.000740742 |
| DNAJ heat shock family protein                        | 100         | 0.000796198 |
| SU(VAR)3-9 homolog 9                                  | 49.89316239 | 0.00837369  |
| basic helix-loop-helix (bHLH) DNA-binding superfamily | 46.66666667 | 0.007949013 |
| SERINE CARBOXYPEPTIDASE-LIKE 49                       | 25.34040518 | 8.32659E-06 |
| receptor kinase 1                                     | 30.74176104 | 0.0089048   |
| Fumarylacetoacetate (FAA) hydrolase family            | 44.68267581 | 0.001749681 |
| CBS domain-containing protein with a domain of unkn   | 39.53488372 | 0.005008332 |
| RNA-binding (RRM/RBD/RNP motifs) family protein       | 45.90163934 | 0.003910739 |
| alpha/beta-Hydrolases superfamily protein             | 52.82258065 | 0.001574405 |
| tRNA/rRNA methyltransferase (SpoU) family protein     | 100         | 0.000703795 |
| Sec1/munc18-like (SM) proteins superfamily            | 73.21428571 | 0.003456358 |
| starch synthase 4                                     | 71.23287671 | 0.003865571 |
| Minichromosome maintenance (MCM2/3/5) family pr       | 100         | 9.19326E-05 |
| Transketolase family protein                          | 76.66666667 | 0.002979043 |
| Chalcone and stilbene synthase family protein         | 28.18035427 | 0.000254749 |
| Protein of unknown function (DUF1644)                 | 92.59259259 | 1.99309E-05 |
| RAB GDP dissociation inhibitor 2                      | 66.66666667 | 0.000107792 |
| leucine-rich repeat transmembrane protein kinase fan  | 60.95571096 | 0.001687678 |
| aspartate aminotransferase                            | 72.22222222 | 0.008968817 |
| nuclear pore anchor                                   | 91.66666667 | 0.000531226 |
| ubiquinol-cytochrome C chaperone family protein       | 88.23529412 | 0.000181199 |
| N/A                                                   | 100         | 4.77422E-10 |
| DEA(D/H)-box RNA helicase family protein              | 100         | 4.77422E-10 |
| ATP-dependent peptidases;nucleotide binding;serine-   | 27.16384739 | 0.005579319 |
| auxin transport protein (BIG)                         | 45.45454545 | 0.000389249 |
| male gametophyte defective 3                          | 38.85714286 | 4.70906E-06 |

|                                                       |             |             |
|-------------------------------------------------------|-------------|-------------|
| Kinase interacting (KIP1-like) family protein         | 36.40254341 | 5.94932E-05 |
| RNA-binding CRS1 / YhbY (CRM) domain-containing pr    | 67.85714286 | 0.003062832 |
| TATA BOX ASSOCIATED FACTOR II 59                      | 100         | 9.291E-06   |
| Protein of unknown function (DUF1644)                 | 95.55555556 | 1.65597E-07 |
| pentatricopeptide (PPR) repeat-containing protein     | 90.90909091 | 0.002195562 |
| tubulin folding cofactor E / Pfifferling (PFI)        | 90          | 0.000150272 |
| Intron maturase, type II family protein               | 91.89189189 | 8.92381E-05 |
| hercules receptor kinase 2                            | 83.33333333 | 0.002153108 |
| GTP binding                                           | 54.54545455 | 0.001442614 |
| toprim domain-containing protein                      | 92.30769231 | 0.004921546 |
| Translation initiation factor SUI1 family protein     | 44.92753623 | 4.56951E-05 |
| Protein kinase superfamily protein                    | 33.65732369 | 0.000760638 |
| Pentatricopeptide repeat (PPR-like) superfamily prote | 61.8556701  | 2.22958E-06 |
| N/A                                                   | 62.87878788 | 2.19395E-05 |
| N/A                                                   | 72.95238095 | 9.0706E-06  |
| ATP-dependent Clp protease                            | 84.59459459 | 0.000427669 |
| protein tyrosine kinase family protein                | 60.60606061 | 0.005062639 |
| zinc finger protein-related                           | 56.66666667 | 0.000128408 |
| Protein of unknown function, DUF538                   | 100         | 0.000175386 |
| NSP (nuclear shuttle protein)-interacting GTPase      | 50          | 0.003675254 |
| sugar transporter 14                                  | 49.31677019 | 0.000229292 |
| N/A                                                   | 65.46610169 | 5.63119E-06 |
| sister chromatid cohesion 1 protein 4                 | 100         | 9.19326E-05 |
| LUC7 related protein                                  | 81.81818182 | 0.007012912 |
| GRIP-related ARF-binding domain-containing protein 1  | 68.75       | 0.000299513 |
| titan9                                                | 82.22222222 | 0.000229292 |
| myosin XI D                                           | 100         | 0.000534009 |
| ribonuclease Ps                                       | 50          | 0.005183954 |
| Galactose oxidase/kelch repeat superfamily protein    | 72.36842105 | 7.96564E-06 |
| NIMA-related kinase 4                                 | 90.90909091 | 0.00016351  |
| chloroplast RNA-binding protein 29                    | 77.27272727 | 0.000499771 |
| KCBP-interacting protein kinase                       | 81.81818182 | 0.001485491 |
| SERINE CARBOXYPEPTIDASE-LIKE 49                       | 100         | 6.21853E-10 |
| INO80 ortholog                                        | 84.61538462 | 0.00023892  |
| N/A                                                   | 31          | 3.16655E-05 |
| 10-formyltetrahydrofolate synthetase                  | 31          | 3.16655E-05 |
| Transcriptional coactivator/pterin dehydratase        | 35.38461538 | 0.005353107 |
| S-adenosyl-L-methionine-dependent methyltransferase   | 91.30434783 | 0.000152866 |
| anaphase-promoting complex/cyclosome 11               | 92.85714286 | 0.00327541  |
| TOPLESS-related 3                                     | 78.65497076 | 1.104E-05   |
| N/A                                                   | 100         | 0.000534009 |



|                                                            |             |             |
|------------------------------------------------------------|-------------|-------------|
| HSP20-like chaperones superfamily protein                  | 72.72727273 | 8.96769E-05 |
| zeta-carotene desaturase                                   | 57.14285714 | 0.005146361 |
| CAMV movement protein interacting protein 7                | 30.76761525 | 0.009714209 |
| S-adenosyl-L-methionine-dependent methyltransferase        | 72.15189873 | 0.006029944 |
| N/A                                                        | 56          | 0.008180794 |
| phosphoenolpyruvate carboxylase 4                          | 68.11594203 | 0.008002959 |
| N/A                                                        | 58.65102639 | 0.00170456  |
| DHHC-type zinc finger family protein                       | 82.5        | 1.43495E-12 |
| Homeotic gene regulator                                    | 40.55258467 | 0.006311455 |
| NPK1-related protein kinase 3                              | 84.61538462 | 0.0016582   |
| Endosomal targeting BRO1-like domain-containing protein    | 80          | 0.008552    |
| Endosomal targeting BRO1-like domain-containing protein    | 77.5862069  | 0.002492172 |
| N/A                                                        | 80          | 0.008552    |
| N/A                                                        | 77.5862069  | 0.002492172 |
| trehalose phosphatase/synthase 5                           | 96          | 3.94723E-05 |
| N/A                                                        | 34.11329137 | 2.29387E-06 |
| N/A                                                        | 78          | 0.000292927 |
| KH domain-containing protein                               | 80          | 0.007299149 |
| Leucine-rich repeat protein kinase family protein          | 90.90909091 | 0.002195562 |
| hydroxymethylglutaryl-CoA synthase / HMG-CoA synthase      | 100         | 0.000796198 |
| Restriction endonuclease, type II-like superfamily protein | 32.67973856 | 0.008596793 |
| Carbohydrate-binding protein                               | 40.38461538 | 0.001806186 |
| plant U-box 49                                             | 62.71186441 | 0.005164617 |
| Pentatricopeptide repeat (PPR) superfamily protein         | 90          | 0.000120058 |
| N/A                                                        | 75.51020408 | 0.005173153 |
| Phosphatidylinositol 3- and 4-kinase family protein with   | 67.85714286 | 5.74583E-05 |
| RNA polymerase II large subunit                            | 33.79120879 | 0.000664113 |
| Chloroplast Ycf2;ATPase, AAA type, core                    | 40.24435394 | 0.000837685 |
| P-loop containing nucleoside triphosphate hydrolases       | 72.72727273 | 0.003077442 |
| Putative glycosyl hydrolase of unknown function (DUF1224)  | 100         | 0.000175386 |
| Tetratricopeptide repeat (TPR)-like superfamily protein    | 76.92307692 | 0.004905666 |
| Insulinase (Peptidase family M16) family protein           | 60.38647343 | 0.000776284 |
| homolog of histone chaperone HIRA                          | 35.48387097 | 0.001920592 |
| cleavage and polyadenylation specificity factor 100        | 100         | 0.001240448 |
| transcription factor-related                               | 25.05145798 | 2.23026E-05 |
| DegP protease 7                                            | 47.43961353 | 0.000227945 |
| N/A                                                        | 58.20895522 | 0.002774689 |
| Pentatricopeptide repeat (PPR) superfamily protein         | 90          | 0.000150272 |
| Methyltransferase                                          | 80          | 0.001078742 |
| N/A                                                        | 29.6875     | 0.005960506 |
| nucleolin like 2                                           | 51.45424837 | 1.35949E-07 |

|                                                        |             |             |
|--------------------------------------------------------|-------------|-------------|
| Calcium-dependent lipid-binding (CaLB domain) family   | 33.01127214 | 0.002262668 |
| Far-red impaired responsive (FAR1) family protein      | 76          | 0.001056985 |
| ARM repeat superfamily protein                         | 100         | 0.000356554 |
| cell division cycle protein 48-related / CDC48-related | 100         | 1.79916E-05 |
| N/A                                                    | 100         | 1.80662E-05 |
| BRI1 suppressor 1 (BSU1)-like 2                        | 100         | 0.005353107 |
| Protein of unknown function (DUF604)                   | 100         | 0.000534009 |
| NAD(P)H dehydrogenase B1                               | 100         | 2.76356E-05 |
| Nucleotide-diphospho-sugar transferases superfamily    | 58.33333333 | 0.004382042 |
| purine permease 5                                      | 43.65576284 | 4.8246E-08  |
| phosphoesterase                                        | 100         | 0.000175386 |
| DNA/RNA helicase protein                               | 61.52829191 | 6.15235E-07 |
| Leucine-rich repeat protein kinase family protein      | 71.42857143 | 0.000954694 |
| mitochondrial editing factor 20                        | 51.12299465 | 5.77753E-08 |
| plastid division1                                      | 100         | 7.77969E-06 |
| glycosyl hydrolase family 81 protein                   | 67.27272727 | 0.006637634 |
| N/A                                                    | 57.26227795 | 0.003828761 |
| ARM repeat superfamily protein                         | 100         | 0.000703795 |
| protein kinase 2A                                      | 36.1025641  | 0.005131118 |
| Tetratricopeptide repeat (TPR)-like superfamily protei | 71.02272727 | 0.006329252 |
| Ribosomal protein L18ae family                         | 71.875      | 0.003804626 |
| P-loop containing nucleoside triphosphate hydrolases   | 43.63636364 | 0.000340295 |
| Rho termination factor                                 | 70.50092764 | 0.009132855 |
| Leucine-rich repeat transmembrane protein kinase far   | 52.10803689 | 0.008172975 |
| Transducin/WD40 repeat-like superfamily protein        | 68.88888889 | 2.29387E-06 |
| ACT-like superfamily protein                           | 42.22222222 | 2.62633E-05 |
| ser/arg-rich protein kinase 4                          | 81.03448276 | 0.000429508 |
| Ubiquitin C-terminal hydrolases superfamily protein    | 71.42857143 | 0.005353107 |
| Leucine-rich repeat family protein                     | 64          | 0.000343098 |
| NAD(P)-binding Rossmann-fold superfamily protein       | 51.46871009 | 0.009468768 |
| Phototropic-responsive NPH3 family protein             | 90.90909091 | 0.004921546 |
| Protein of unknown function (DUF1000)                  | 48.14814815 | 7.79233E-06 |
| Telomerase activating protein Est1                     | 100         | 0.001240448 |
| Ribonuclease E inhibitor RraA/Dimethylmenaquinone      | 85.71428571 | 0.003645592 |
| Protein of unknown function (DUF1421)                  | 94.44444444 | 0.000775974 |
| ARM repeat superfamily protein                         | 80.85106383 | 2.49223E-05 |
| triosephosphate isomerase                              | 56.41025641 | 0.007970342 |
| A20/AN1-like zinc finger family protein                | 86.36363636 | 0.001440019 |
| topoisomerase 6 subunit B                              | 66.66666667 | 3.08821E-05 |
| crinkly4                                               | 29.78723404 | 7.14707E-05 |
| CTC-interacting domain 4                               | 100         | 1.65617E-05 |

|                                                                        |             |             |
|------------------------------------------------------------------------|-------------|-------------|
| Protein phosphatase 2A, regulatory subunit PR55                        | 94.44444444 | 5.62741E-05 |
| pleiotropic drug resistance 12                                         | 48.93617021 | 0.00195593  |
| Pre-mRNA-processing-splicing factor                                    | 90          | 0.000312342 |
| HEAT SHOCK PROTEIN 89.1                                                | 70.76923077 | 0.00244009  |
| Kinase-related protein of unknown function (DUF1296)                   | 100         | 0.005353107 |
| ARM repeat superfamily protein                                         | 65.83333333 | 0.000664113 |
| S-adenosyl-L-methionine-dependent methyltransferase                    | 37.14285714 | 0.008730732 |
| plastid division1                                                      | 40.90909091 | 0.000785474 |
| Ribosomal protein L33 family protein                                   | 87.5        | 0.00077132  |
| N/A                                                                    | 42.36641221 | 0.000406439 |
| Sulfite exporter TauE/SafE family protein                              | 100         | 0.005353107 |
| N/A                                                                    | 77.36842105 | 0.000903423 |
| long chain acyl-CoA synthetase 9                                       | 28.74006453 | 2.20084E-06 |
| N/A                                                                    | 28.74006453 | 2.20084E-06 |
| hydroxyproline-rich glycoprotein family protein                        | 90.90909091 | 0.000566467 |
| Restriction endonuclease, type II-like superfamily protein             | 90.90909091 | 0.000566467 |
| autophagy protein Apg5 family                                          | 91.30434783 | 0.000325828 |
| CASC3/Barentsz eIF4AIII binding                                        | 36.69172932 | 0.003705057 |
| Plant protein of unknown function (DUF639)                             | 95.65217391 | 1.61342E-06 |
| Tetratricopeptide repeat (TPR)-like superfamily protein                | 58.97435897 | 0.00412992  |
| Pentatricopeptide repeat (PPR) superfamily protein                     | 47.61904762 | 0.001314704 |
| plant U-box 17                                                         | 65.625      | 0.000464513 |
| auxin response factor 8                                                | 76.19047619 | 0.002126331 |
| cullin4                                                                | 31.27548049 | 0.000375798 |
| alpha-mannosidase 3                                                    | 93.33333333 | 0.000116803 |
| potassium channel in Arabidopsis thaliana 1                            | 93.33333333 | 0.000116803 |
| Inositol monophosphatase family protein                                | 68.29268293 | 2.16506E-05 |
| Ribosomal protein L12/ ATP-dependent Clp protease subunit              | 100         | 0.000115391 |
| ATP-citrate lyase B-1                                                  | 25.49019608 | 0.001933999 |
| N/A                                                                    | 92.30769231 | 5.87593E-05 |
| N/A                                                                    | 88.23529412 | 0.004244872 |
| Mob1/phocein family protein                                            | 53.84615385 | 0.008698249 |
| N/A                                                                    | 53.08641975 | 2.39209E-05 |
| Polynucleotidyl transferase, ribonuclease H-like superfamily protein   | 60.41666667 | 0.008827127 |
| PREFOLDIN 1                                                            | 52.17391304 | 0.003546663 |
| Trypsin family protein                                                 | 53.03030303 | 0.002618347 |
| Cellulose synthase family protein                                      | 80          | 0.00218781  |
| ATPases;nucleotide binding;ATP binding;nucleoside-triphosphate binding | 26.66666667 | 0.005771093 |
| transducin family protein / WD-40 repeat family protein                | 100         | 0.000796198 |
| Protein kinase superfamily protein                                     | 54.54545455 | 3.56531E-05 |
| pentatricopeptide (PPR) repeat-containing protein                      | 86.14718615 | 0.00139578  |

|                                                        |             |             |
|--------------------------------------------------------|-------------|-------------|
| apyrase 2                                              | 74.46428571 | 7.49529E-05 |
| S-adenosyl-L-methionine-dependent methyltransferase    | 71.52777778 | 1.80691E-11 |
| RNA-binding (RRM/RBD/RNP motifs) family protein        | 76.59574468 | 0.004387699 |
| golgin candidate 1                                     | 88.57142857 | 1.04662E-06 |
| Sec23/Sec24 protein transport family protein           | 100         | 0.001933999 |
| N/A                                                    | 100         | 0.001933999 |
| compromised recognition of TCV 1                       | 61.53846154 | 0.002461367 |
| compromised recognition of TCV 1                       | 100         | 1.15987E-09 |
| Protein kinase superfamily protein                     | 51.2195122  | 0.001098386 |
| disease resistance family protein / LRR family protein | 35.75989783 | 0.005071096 |
| CAP160 protein                                         | 52.38095238 | 0.002365643 |
| F-box/RNI-like superfamily protein                     | 44.11764706 | 0.00432082  |
| hydroxyproline-rich glycoprotein family protein        | 72.80701754 | 0.001484791 |
| microtubule-associated proteins 70-5                   | 28.57699805 | 0.007765513 |
| Saposin-like aspartyl protease family protein          | 100         | 0.000115391 |
| tobamovirus multiplication 1                           | 52.38095238 | 0.001724632 |
| phospholipases;galactolipases                          | 30.80467919 | 0.005009981 |
| N/A                                                    | 45.65217391 | 0.008725044 |
| calmodulin binding;transcription regulators            | 64.28571429 | 2.84235E-06 |
| PAS domain-containing protein tyrosine kinase family   | 100         | 0.001933999 |
| ARM repeat superfamily protein                         | 71.42857143 | 0.006163469 |
| Transducin/WD40 repeat-like superfamily protein        | 54.23728814 | 0.000379699 |
| N/A                                                    | 33.30395829 | 0.00037888  |
| fatty acyl-ACP thioesterases B                         | 28.38612368 | 0.007118315 |
| histone deacetylase 15                                 | 47.54299754 | 0.008669534 |
| Transcription factor TFIIIE, alpha subunit             | 57.89473684 | 0.001262576 |
| arogenate dehydrogenase                                | 29.15662651 | 0.002726993 |
| Phosphatidic acid phosphatase (PAP2) family protein    | 68.75       | 0.007623546 |
| PPPDE putative thiol peptidase family protein          | 91.66666667 | 0.000531226 |
| Plant VAMP (vesicle-associated membrane protein) fa    | 75          | 0.001377202 |
| N/A                                                    | 37.67292127 | 1.67271E-13 |
| casein kinase alpha 1                                  | 69.49152542 | 0.00716723  |
| MRG family protein                                     | 63.08243728 | 0.0002397   |
| mitotic-like cyclin 3B from Arabidopsis                | 100         | 0.000703795 |
| histidine kinase 5                                     | 25.83476027 | 0.00795685  |
| Protein of unknown function (DUF1336)                  | 38.98305085 | 0.000788107 |
| N/A                                                    | 86.42857143 | 0.000603677 |
| GYF domain-containing protein                          | 56          | 0.004902405 |
| DNA repair-recombination protein (RAD50)               | 43.44086022 | 0.000813972 |
| ubiquitin-specific protease 4                          | 52          | 0.002856708 |
| Protein of unknown function (DUF630 and DUF632)        | 45.27272727 | 4.18656E-05 |

|                                                         |             |             |
|---------------------------------------------------------|-------------|-------------|
| Uroporphyrinogen decarboxylase                          | 55.69620253 | 0.000102596 |
| DegP protease 7                                         | 92.30769231 | 0.001904087 |
| ALWAYS EARLY 4                                          | 40.47354791 | 0.001643595 |
| Homeodomain-like superfamily protein                    | 37.89431384 | 0.000137899 |
| nodulin MtN21 /EamA-like transporter family protein     | 29.69866418 | 0.002513721 |
| smr (Small MutS Related) domain-containing protein      | 95.23809524 | 2.50298E-08 |
| RNA helicase, ATP-dependent, SK12/DOB1 protein          | 60          | 0.005907747 |
| beta-1,2-xylosyltransferase                             | 51.66666667 | 0.000105925 |
| beta-1,2-xylosyltransferase                             | 51.66666667 | 0.000105925 |
| N/A                                                     | 52.07017544 | 0.009832971 |
| MAP kinase 20                                           | 29.78723404 | 0.004711596 |
| trehalose phosphate synthase                            | 100         | 2.29387E-06 |
| Phototropic-responsive NPH3 family protein              | 40.36697248 | 0.001244221 |
| plant U-box 9                                           | 100         | 0.000534009 |
| myb-like HTH transcriptional regulator family protein   | 45.47088426 | 0.008806789 |
| N/A                                                     | 45.47088426 | 0.008806789 |
| protein kinase 1B                                       | 92.85714286 | 0.001904087 |
| Sulfite exporter TauE/SafE family protein               | 27.42470296 | 0.000407564 |
| sulfoquinovosyldiacylglycerol 2                         | 41.19743407 | 3.16655E-05 |
| zinc finger protein-related                             | 54.28571429 | 0.007693472 |
| Calcium-dependent lipid-binding (CaLB domain) family    | 100         | 0.000703795 |
| 5\'-3\' exonuclease family protein                      | 75          | 0.000244744 |
| RNA polymerase II transcription mediators               | 56          | 0.006489924 |
| Protein of unknown function (DUF630 and DUF632)         | 100         | 1.15987E-09 |
| TCP-1/cpn60 chaperonin family protein                   | 39.0625     | 0.009395572 |
| Pectate lyase family protein                            | 55          | 0.000441067 |
| N/A                                                     | 78.33333333 | 0.001959434 |
| purple acid phosphatase 23                              | 61.11111111 | 0.001369449 |
| PHD finger family protein                               | 100         | 5.68891E-07 |
| COBRA-like extracellular glycosyl-phosphatidyl inositol | 78.57142857 | 0.00338527  |
| NSP-interacting kinase 1                                | 75.97402597 | 2.47622E-10 |
| Proline-rich spliceosome-associated (PSP) family prote  | 77.27272727 | 0.006226358 |
| NAD-dependent glycerol-3-phosphate dehydrogenase        | 54.16666667 | 0.005138627 |
| NAD <sup>+</sup> transporter 2                          | 73.21428571 | 0.005836783 |
| zinc ion binding;nucleic acid binding;zinc ion binding  | 88.46153846 | 0.000464062 |
| Glycosyl hydrolase family 38 protein                    | 76.47058824 | 0.000150717 |
| disproportionating enzyme 2                             | 100         | 0.00014754  |
| response regulator 24                                   | 25.33151059 | 0.009895324 |
| ENTH/VHS/GAT family protein                             | 25.33151059 | 0.009895324 |
| plus-3 domain-containing protein                        | 84.84848485 | 0.001249711 |
| ankyrin repeat family protein                           | 63.0952381  | 0.006619382 |

|                                                        |             |             |
|--------------------------------------------------------|-------------|-------------|
| Ribosomal protein L4/L1 family                         | 49.14021164 | 6.03721E-06 |
| ARM repeat superfamily protein                         | 54.54545455 | 0.009312357 |
| ENTH/VHS family protein                                | 38.55421687 | 0.001574215 |
| ENTH/VHS family protein                                | 100         | 5.45404E-07 |
| Cleavage and polyadenylation specificity factor (CPSF) | 42.82296651 | 0.00197301  |
| HIT zinc finger ;PAPA-1-like conserved region          | 30.6122449  | 0.003545459 |
| N/A                                                    | 32.14101904 | 0.005228525 |
| D-aminoacid aminotransferase-like PLP-dependent en     | 65.78947368 | 0.002174657 |
| DNAJ heat shock N-terminal domain-containing protei    | 92.85714286 | 0.000709141 |
| zinc knuckle (CCHC-type) family protein                | 100         | 0.000534009 |
| SU(VAR)3-9 homolog 9                                   | 39.9897855  | 0.000586613 |
| SU(VAR)3-9 homolog 9                                   | 75.58441558 | 5.35014E-05 |
| Protein of unknown function (DUF1666)                  | 100         | 8.63345E-08 |
| Protein of unknown function (DUF668)                   | 92.30769231 | 0.000709141 |
| Protein kinase superfamily protein                     | 57.77777778 | 0.001304542 |
| Nucleotidyl transferase superfamily protein            | 100         | 0.001240448 |
| clathrin adaptor complexes medium subunit family pr    | 90.47619048 | 0.000310043 |
| Ubiquitin-like superfamily protein                     | 45.90301003 | 0.001927119 |
| Cyclase family protein                                 | 92          | 8.79837E-06 |
| Homeodomain-like protein with RING/FYVE/PHD-type       | 70          | 0.006629474 |
| transducin family protein / WD-40 repeat family prote  | 36.71096346 | 0.006801176 |
| cysteine-rich RLK (RECEPTOR-like protein kinase) 29    | 25.71022727 | 0.005353107 |
| Methyltransferase MT-A70 family protein                | 35.17412698 | 2.46415E-09 |
| DNAse I-like superfamily protein                       | 27.99422799 | 0.00674261  |
| lactate/malate dehydrogenase family protein            | 100         | 0.000356554 |
| syntaxin of plants 43                                  | 68.88888889 | 0.006458536 |
| N/A                                                    | 100         | 0.001933999 |

---

---

**P value**

---

8.70901E-06  
4.08726E-12  
1.07761E-09  
7.39602E-07  
4.03019E-06  
1.68651E-06  
7.66995E-08  
2.01911E-05  
1.39522E-11  
1.08251E-05  
1.08251E-05  
1.21106E-05  
1.12889E-08  
3.05751E-06  
8.48089E-10  
1.48569E-05  
7.92597E-06  
5.73713E-09  
4.42884E-09  
1.44686E-11  
2.72816E-06  
1.90893E-06  
1.54644E-06  
1.19629E-06  
1.70997E-06  
2.31518E-05  
1.91181E-05  
2.85434E-08  
9.52608E-06  
2.56757E-07  
4.29593E-06  
5.49176E-07  
9.53081E-06  
8.57689E-06  
1.73768E-09  
1.56517E-08  
1.44926E-06  
1.01792E-05  
2.83514E-06

1.06007E-17  
7.77938E-06  
3.00785E-13  
1.80373E-06  
2.45563E-07  
1.01284E-05  
1.55753E-12  
3.80149E-07  
2.80843E-11  
9.42644E-06  
5.66904E-07  
2.9254E-09  
1.55009E-08  
1.16556E-05  
1.54644E-06  
2.00027E-08  
4.69924E-07  
1.08037E-08  
7.91851E-06  
2.83514E-06  
1.08251E-05  
8.70536E-06  
5.98256E-06  
4.39252E-08  
1.05794E-05  
5.4287E-06  
3.45642E-06  
1.35052E-06  
7.53919E-07  
5.35538E-06  
8.99497E-10  
5.39257E-06  
9.61483E-06  
1.90416E-05  
1.90416E-05  
1.1884E-07  
9.04313E-11  
7.39602E-07  
1.0919E-05  
1.37164E-05  
2.83514E-06



1.52888E-10  
2.01037E-05  
5.98434E-07  
2.90606E-06  
4.70062E-06  
1.80741E-05  
3.48546E-11  
1.28829E-09  
1.33244E-05  
5.09877E-07  
3.77185E-08  
5.09877E-07  
6.20037E-08  
1.25558E-06  
1.4628E-21  
5.71707E-14  
2.32405E-05  
6.44839E-06  
2.18258E-14  
8.05448E-07  
9.48292E-09  
1.58215E-14  
1.53878E-05  
2.01911E-05  
1.41628E-07  
1.82388E-05  
8.98773E-06  
8.98773E-06  
1.03815E-07  
4.09053E-06  
2.0913E-06  
1.24253E-05  
4.29594E-08  
2.83514E-06  
1.84286E-06  
1.18536E-07  
7.20284E-06  
6.13792E-08  
2.31098E-08  
1.05951E-10  
1.19193E-08

7.64816E-06  
2.06763E-09  
5.88812E-06  
2.69215E-06  
9.3863E-08  
2.24346E-07  
2.2427E-08  
1.69135E-06  
1.90528E-08  
2.83514E-06  
8.11773E-09  
2.42167E-06  
2.38899E-06  
1.23804E-05  
7.89836E-07  
8.74075E-07  
1.96873E-05  
1.82925E-05  
3.07143E-09  
2.13605E-05  
2.41225E-06  
9.82772E-06  
7.04931E-06  
2.11518E-06  
7.39602E-07  
6.01228E-06  
6.94645E-06  
5.75246E-08  
4.94387E-06  
2.03258E-07  
8.72584E-09  
7.01159E-08  
2.31143E-06  
2.15798E-05  
5.03324E-07  
1.34475E-07  
4.48144E-14  
4.48144E-14  
1.14563E-05  
3.44255E-07  
1.58163E-09

3.4205E-08  
5.13743E-06  
3.49531E-09  
3.32744E-11  
3.36519E-06  
1.06221E-07  
5.5233E-08  
3.27161E-06  
1.88523E-06  
9.61483E-06  
2.41273E-08  
8.14956E-07  
6.49987E-10  
9.75002E-09  
3.38578E-09  
3.84506E-07  
9.97215E-06  
8.68221E-08  
1.2943E-07  
6.51198E-06  
1.78238E-07  
1.94654E-09  
5.75246E-08  
1.55164E-05  
2.45156E-07  
1.78103E-07  
5.09877E-07  
1.03252E-05  
2.91492E-09  
1.1884E-07  
4.67291E-07  
1.96087E-06  
6.20201E-14  
1.86949E-07  
1.50593E-08  
1.50593E-08  
1.07557E-05  
1.09054E-07  
5.60865E-06  
4.27989E-09  
5.09877E-07

5.56361E-08  
1.02201E-05  
2.39574E-05  
1.26867E-05  
1.90667E-05  
1.84582E-05  
2.33629E-06  
7.57662E-17  
1.34549E-05  
2.25451E-06  
2.02696E-05  
3.93485E-06  
2.03E-05  
3.93485E-06  
1.99732E-08  
6.78122E-10  
2.38445E-07  
1.6358E-05  
3.36519E-06  
8.74075E-07  
2.0401E-05  
2.51532E-06  
1.02677E-05  
8.03835E-08  
1.02923E-05  
3.25294E-08  
6.7405E-07  
9.39278E-07  
5.17793E-06  
1.2943E-07  
9.51905E-06  
8.3912E-07  
2.72598E-06  
1.54644E-06  
9.92772E-09  
1.76856E-07  
4.51724E-06  
1.06221E-07  
1.28235E-06  
1.24838E-05  
2.68185E-11

3.49782E-06  
1.25184E-06  
3.05926E-07  
7.62613E-09  
7.75047E-09  
1.08251E-05  
5.09877E-07  
1.28935E-08  
8.1463E-06  
8.06682E-12  
1.2943E-07  
1.49791E-10  
1.09988E-06  
9.95672E-12  
2.81835E-09  
1.44228E-05  
6.86223E-06  
7.39602E-07  
1.01758E-05  
1.35068E-05  
6.81339E-06  
2.87235E-07  
2.20549E-05  
1.90416E-05  
6.75522E-10  
1.21723E-08  
3.8679E-07  
1.08145E-05  
2.90355E-07  
2.31716E-05  
9.61483E-06  
2.82864E-09  
1.54644E-06  
6.44839E-06  
8.38216E-07  
1.13863E-08  
1.83649E-05  
1.88078E-06  
1.46074E-08  
4.26113E-08  
6.87651E-09

3.18177E-08  
2.8759E-06  
2.59288E-07  
3.84009E-06  
1.08251E-05  
6.74524E-07  
2.08206E-05  
8.51358E-07  
8.32057E-07  
3.61843E-07  
1.08251E-05  
1.02558E-06  
6.35903E-10  
6.35903E-10  
5.49176E-07  
5.49176E-07  
2.72634E-07  
6.58346E-06  
4.50794E-10  
7.55645E-06  
1.67179E-06  
4.2683E-07  
3.21845E-06  
3.27398E-07  
7.78614E-08  
7.78614E-08  
9.60573E-09  
7.66995E-08  
2.78943E-06  
3.36107E-08  
7.82335E-06  
2.06864E-05  
1.0806E-08  
2.11353E-05  
6.23179E-06  
4.19359E-06  
3.34038E-06  
1.1973E-05  
8.74075E-07  
1.75962E-08  
1.79811E-06

4.51821E-08  
1.28533E-15  
8.16793E-06  
2.7272E-10  
2.83514E-06  
2.83514E-06  
3.88079E-06  
1.26737E-13  
1.31234E-06  
9.99996E-06  
3.68476E-06  
8.01981E-06  
1.95779E-06  
1.76766E-05  
7.66995E-08  
2.36878E-06  
9.83903E-06  
2.07821E-05  
8.65029E-10  
2.83514E-06  
1.30067E-05  
3.33581E-07  
3.324E-07  
1.5864E-05  
2.05972E-05  
1.58699E-06  
4.40959E-06  
1.72863E-05  
5.03324E-07  
1.76844E-06  
6.86935E-18  
1.59888E-05  
1.87884E-07  
7.39602E-07  
1.83222E-05  
8.55946E-07  
5.94415E-07  
9.50562E-06  
9.03138E-07  
4.69267E-06  
2.15109E-08

6.59081E-08  
2.69215E-06  
2.22863E-06  
9.47969E-08  
3.97809E-06  
3.74449E-12  
1.2333E-05  
6.86686E-08  
6.86686E-08  
2.43585E-05  
8.99044E-06  
6.77352E-10  
1.55571E-06  
5.09877E-07  
2.10672E-05  
2.10672E-05  
2.69215E-06  
3.63144E-07  
1.50702E-08  
1.74787E-05  
7.39602E-07  
1.9366E-07  
1.39829E-05  
1.26737E-13  
2.29579E-05  
4.01728E-07  
2.88392E-06  
1.75748E-06  
1.36839E-10  
5.83931E-06  
2.21541E-14  
1.31913E-05  
1.0201E-05  
1.21562E-05  
4.25735E-07  
1.06659E-07  
1.03544E-07  
2.45492E-05  
2.45492E-05  
1.56624E-06  
1.43394E-05



2.12069E-09  
2.26932E-05  
2.11146E-06  
1.30389E-10  
2.91114E-06  
6.21927E-06  
1.04484E-05  
3.31392E-06  
7.4782E-07  
5.09877E-07  
5.72673E-07  
2.98129E-08  
1.57648E-11  
7.4782E-07  
1.65313E-06  
1.54644E-06  
2.5647E-07  
2.74309E-06  
3.26481E-09  
1.43753E-05  
1.4878E-05  
1.07817E-05  
2.85516E-13  
1.47182E-05  
3.05926E-07  
1.38654E-05  
2.83514E-06

### **Supplemental Table 3: List of 180 hyper-methylated genes**

#### **METHYLATED REGIONS**

---

mytileDiff25p200.hyper\_merged\_CHG.Chr01.3247801-3248000  
mytileDiff25p200.hyper\_merged\_CHG.Chr01.3809801-3810000  
mytileDiff25p200.hyper\_merged\_CHG.Chr01.14059801-14060000  
mytileDiff25p200.hyper\_merged\_CHG.Chr01.27947801-27948000  
mytileDiff25p200.hyper\_merged\_CHG.Chr01.28296001-28296200  
mytileDiff25p200.hyper\_merged\_CHG.Chr01.39914801-39915000  
mytileDiff25p200.hyper\_merged\_CHG.Chr01.51419601-51419800  
mytileDiff25p200.hyper\_merged\_CHG.Chr01.54098201-54098400  
mytileDiff25p200.hyper\_merged\_CHG.Chr01.56514201-56514400  
mytileDiff25p200.hyper\_merged\_CHG.Chr02.3944201-3944400  
mytileDiff25p200.hyper\_merged\_CHG.Chr02.4705401-4705600  
mytileDiff25p200.hyper\_merged\_CHG.Chr02.8446601-8446800  
mytileDiff25p200.hyper\_merged\_CHG.Chr02.8836201-8836400  
mytileDiff25p200.hyper\_merged\_CHG.Chr02.11813801-11814000  
mytileDiff25p200.hyper\_merged\_CHG.Chr02.13182001-13182200  
mytileDiff25p200.hyper\_merged\_CHG.Chr02.13256601-13256800  
mytileDiff25p200.hyper\_merged\_CHG.Chr02.13400201-13400400  
mytileDiff25p200.hyper\_merged\_CHG.Chr02.14173401-14173600  
mytileDiff25p200.hyper\_merged\_CHG.Chr02.21064601-21064800  
mytileDiff25p200.hyper\_merged\_CHG.Chr02.24762401-24762600  
mytileDiff25p200.hyper\_merged\_CHG.Chr02.26134801-26135000  
mytileDiff25p200.hyper\_merged\_CHG.Chr02.26356201-26356400  
mytileDiff25p200.hyper\_merged\_CHG.Chr02.35290201-35290400  
mytileDiff25p200.hyper\_merged\_CHG.Chr02.35678401-35678600  
mytileDiff25p200.hyper\_merged\_CHG.Chr02.38833001-38833200  
mytileDiff25p200.hyper\_merged\_CHG.Chr02.40121801-40122000  
mytileDiff25p200.hyper\_merged\_CHG.Chr02.43946401-43946600  
mytileDiff25p200.hyper\_merged\_CHG.Chr02.47075201-47075400  
mytileDiff25p200.hyper\_merged\_CHG.Chr03.791401-791600  
mytileDiff25p200.hyper\_merged\_CHG.Chr03.1440001-1440200  
mytileDiff25p200.hyper\_merged\_CHG.Chr03.6985801-6986000  
mytileDiff25p200.hyper\_merged\_CHG.Chr03.8509601-8509800  
mytileDiff25p200.hyper\_merged\_CHG.Chr03.9050601-9050800  
mytileDiff25p200.hyper\_merged\_CHG.Chr03.29196801-29197000  
mytileDiff25p200.hyper\_merged\_CHG.Chr03.29376601-29376800  
mytileDiff25p200.hyper\_merged\_CHG.Chr03.34800801-34801000  
mytileDiff25p200.hyper\_merged\_CHG.Chr03.35717601-35717800  
mytileDiff25p200.hyper\_merged\_CHG.Chr04.7788801-7789000  
mytileDiff25p200.hyper\_merged\_CHG.Chr04.18086601-18086800  
mytileDiff25p200.hyper\_merged\_CHG.Chr04.19659401-19659600  
mytileDiff25p200.hyper\_merged\_CHG.Chr04.21394601-21394800

mytileDiff25p200.hyper\_merged\_CHG.Chr04.36086801-36087000  
mytileDiff25p200.hyper\_merged\_CHG.Chr04.40387401-40387600  
mytileDiff25p200.hyper\_merged\_CHG.Chr04.48280001-48280200  
mytileDiff25p200.hyper\_merged\_CHG.Chr04.52278001-52278200  
mytileDiff25p200.hyper\_merged\_CHG.Chr05.5390401-5390600  
mytileDiff25p200.hyper\_merged\_CHG.Chr05.6802401-6802600  
mytileDiff25p200.hyper\_merged\_CHG.Chr05.14964801-14965000  
mytileDiff25p200.hyper\_merged\_CHG.Chr05.25131801-25132000  
mytileDiff25p200.hyper\_merged\_CHG.Chr05.39147401-39147600  
mytileDiff25p200.hyper\_merged\_CHG.Chr06.853601-853800  
mytileDiff25p200.hyper\_merged\_CHG.Chr06.7484001-7484200  
mytileDiff25p200.hyper\_merged\_CHG.Chr06.7598001-7598200  
mytileDiff25p200.hyper\_merged\_CHG.Chr06.22881601-22881800  
mytileDiff25p200.hyper\_merged\_CHG.Chr06.23184601-23184800  
mytileDiff25p200.hyper\_merged\_CHG.Chr06.28882401-28882600  
mytileDiff25p200.hyper\_merged\_CHG.Chr06.30993201-30993400  
mytileDiff25p200.hyper\_merged\_CHG.Chr06.37302001-37302200  
mytileDiff25p200.hyper\_merged\_CHG.Chr06.39223001-39223200  
mytileDiff25p200.hyper\_merged\_CHG.Chr06.44233601-44233800  
mytileDiff25p200.hyper\_merged\_CHG.Chr07.1115801-1116000  
mytileDiff25p200.hyper\_merged\_CHG.Chr07.5330201-5330400  
mytileDiff25p200.hyper\_merged\_CHG.Chr07.9341401-9341600  
mytileDiff25p200.hyper\_merged\_CHG.Chr07.9341401-9341600  
mytileDiff25p200.hyper\_merged\_CHG.Chr07.19429401-19429600  
mytileDiff25p200.hyper\_merged\_CHG.Chr07.34966401-34966600  
mytileDiff25p200.hyper\_merged\_CHG.Chr07.36936201-36936400  
mytileDiff25p200.hyper\_merged\_CHG.Chr08.4183401-4183600  
mytileDiff25p200.hyper\_merged\_CHG.Chr08.4686001-4686200  
mytileDiff25p200.hyper\_merged\_CHG.Chr08.5477201-5477400  
mytileDiff25p200.hyper\_merged\_CHG.Chr08.15788601-15788800  
mytileDiff25p200.hyper\_merged\_CHG.Chr08.22362201-22362400  
mytileDiff25p200.hyper\_merged\_CHG.Chr08.37164801-37165000  
mytileDiff25p200.hyper\_merged\_CHG.Chr08.45425401-45425600  
mytileDiff25p200.hyper\_merged\_CHG.Chr09.10172201-10172400  
mytileDiff25p200.hyper\_merged\_CHG.Chr09.19464401-19464600  
mytileDiff25p200.hyper\_merged\_CHG.Chr09.19711001-19711200  
mytileDiff25p200.hyper\_merged\_CHG.Chr09.20342801-20343000  
mytileDiff25p200.hyper\_merged\_CHG.Chr09.20556001-20556200  
mytileDiff25p200.hyper\_merged\_CHG.Chr09.32770601-32770800  
mytileDiff25p200.hyper\_merged\_CHG.Chr10.4861801-4862000  
mytileDiff25p200.hyper\_merged\_CHG.Chr10.23109801-23110000  
mytileDiff25p200.hyper\_merged\_CHG.Chr10.28927601-28927800  
mytileDiff25p200.hyper\_merged\_CHG.Chr10.29664001-29664200

mytileDiff25p200.hyper\_merged\_CHG.Chr10.32505601-32505800  
mytileDiff25p200.hyper\_merged\_CHG.Chr10.40056801-40057000  
mytileDiff25p200.hyper\_merged\_CHG.Chr10.40597801-40598000  
mytileDiff25p200.hyper\_merged\_CHG.Chr10.42191801-42192000  
mytileDiff25p200.hyper\_merged\_CHG.Chr11.5025601-5025800  
mytileDiff25p200.hyper\_merged\_CHG.Chr11.6984401-6984600  
mytileDiff25p200.hyper\_merged\_CHG.Chr11.14167801-14168000  
mytileDiff25p200.hyper\_merged\_CHG.Chr11.15953001-15953200  
mytileDiff25p200.hyper\_merged\_CHG.Chr11.26302401-26302600  
mytileDiff25p200.hyper\_merged\_CHG.Chr11.32578401-32578600  
mytileDiff25p200.hyper\_merged\_CHG.Chr12.3260201-3260400  
mytileDiff25p200.hyper\_merged\_CHG.Chr12.3763801-3764000  
mytileDiff25p200.hyper\_merged\_CHG.Chr12.17197201-17197400  
mytileDiff25p200.hyper\_merged\_CHG.Chr12.17197201-17197400  
mytileDiff25p200.hyper\_merged\_CHG.Chr12.17197201-17197400  
mytileDiff25p200.hyper\_merged\_CHG.Chr12.21392001-21392200  
mytileDiff25p200.hyper\_merged\_CHG.Chr12.24272401-24272600  
mytileDiff25p200.hyper\_merged\_CHG.Chr12.24272401-24272600  
mytileDiff25p200.hyper\_merged\_CHG.Chr12.38302001-38302200  
mytileDiff25p200.hyper\_merged\_CHG.Chr13.2828601-2828800  
mytileDiff25p200.hyper\_merged\_CHG.Chr13.4643401-4643600  
mytileDiff25p200.hyper\_merged\_CHG.Chr13.10065401-10065600  
mytileDiff25p200.hyper\_merged\_CHG.Chr13.13931001-13931200  
mytileDiff25p200.hyper\_merged\_CHG.Chr13.22378801-22379000  
mytileDiff25p200.hyper\_merged\_CHG.Chr13.26454201-26454400  
mytileDiff25p200.hyper\_merged\_CHG.Chr13.28176801-28177000  
mytileDiff25p200.hyper\_merged\_CHG.Chr13.33515001-33515200  
mytileDiff25p200.hyper\_merged\_CHG.Chr13.41503001-41503200  
mytileDiff25p200.hyper\_merged\_CHG.Chr13.45714201-45714400  
mytileDiff25p200.hyper\_merged\_CHG.Chr14.12934801-12935000  
mytileDiff25p200.hyper\_merged\_CHG.Chr14.22060801-22061000  
mytileDiff25p200.hyper\_merged\_CHG.Chr14.29003001-29003200  
mytileDiff25p200.hyper\_merged\_CHG.Chr14.42962401-42962600  
mytileDiff25p200.hyper\_merged\_CHG.Chr14.46352601-46352800  
mytileDiff25p200.hyper\_merged\_CHG.Chr14.46480601-46480800  
mytileDiff25p200.hyper\_merged\_CHG.Chr15.99401-99600  
mytileDiff25p200.hyper\_merged\_CHG.Chr15.16809401-16809600  
mytileDiff25p200.hyper\_merged\_CHG.Chr15.17338401-17338600  
mytileDiff25p200.hyper\_merged\_CHG.Chr15.33600001-33600200  
mytileDiff25p200.hyper\_merged\_CHG.Chr15.34828601-34828800  
mytileDiff25p200.hyper\_merged\_CHG.Chr15.44464601-44464800  
mytileDiff25p200.hyper\_merged\_CHG.Chr15.47476201-47476400  
mytileDiff25p200.hyper\_merged\_CHG.Chr15.51244401-51244600

mytileDiff25p200.hyper\_merged\_CHG.Chr15.51407201-51407400  
mytileDiff25p200.hyper\_merged\_CHG.Chr15.51621201-51621400  
mytileDiff25p200.hyper\_merged\_CHG.Chr15.51619201-51619400  
mytileDiff25p200.hyper\_merged\_CHG.Chr16.337601-337800  
mytileDiff25p200.hyper\_merged\_CHG.Chr16.20403601-20403800  
mytileDiff25p200.hyper\_merged\_CHG.Chr16.20397601-20397800  
mytileDiff25p200.hyper\_merged\_CHG.Chr16.20403601-20403800  
mytileDiff25p200.hyper\_merged\_CHG.Chr16.31130801-31131000  
mytileDiff25p200.hyper\_merged\_CHG.Chr16.34242401-34242600  
mytileDiff25p200.hyper\_merged\_CHG.Chr16.34606401-34606600  
mytileDiff25p200.hyper\_merged\_CHG.Chr16.34913801-34914000  
mytileDiff25p200.hyper\_merged\_CHG.Chr16.35494801-35495000  
mytileDiff25p200.hyper\_merged\_CHG.Chr17.5352401-5352600  
mytileDiff25p200.hyper\_merged\_CHG.Chr17.8178201-8178400  
mytileDiff25p200.hyper\_merged\_CHG.Chr17.8178601-8178800  
mytileDiff25p200.hyper\_merged\_CHG.Chr17.9230201-9230400  
mytileDiff25p200.hyper\_merged\_CHG.Chr17.10873601-10873800  
mytileDiff25p200.hyper\_merged\_CHG.Chr17.11478401-11478600  
mytileDiff25p200.hyper\_merged\_CHG.Chr17.17678801-17679000  
mytileDiff25p200.hyper\_merged\_CHG.Chr17.31391001-31391200  
mytileDiff25p200.hyper\_merged\_CHG.Chr17.33005801-33006000  
mytileDiff25p200.hyper\_merged\_CHG.Chr17.40267601-40267800  
mytileDiff25p200.hyper\_merged\_CHG.Chr17.40267601-40267800  
mytileDiff25p200.hyper\_merged\_CHG.Chr18.4157001-4157200  
mytileDiff25p200.hyper\_merged\_CHG.Chr18.16527201-16527400  
mytileDiff25p200.hyper\_merged\_CHG.Chr18.18537401-18537600  
mytileDiff25p200.hyper\_merged\_CHG.Chr18.20307001-20307200  
mytileDiff25p200.hyper\_merged\_CHG.Chr18.20307001-20307200  
mytileDiff25p200.hyper\_merged\_CHG.Chr18.37300601-37300800  
mytileDiff25p200.hyper\_merged\_CHG.Chr18.44403001-44403200  
mytileDiff25p200.hyper\_merged\_CHG.Chr18.47112401-47112600  
mytileDiff25p200.hyper\_merged\_CHG.Chr18.51059801-51060000  
mytileDiff25p200.hyper\_merged\_CHG.Chr18.55207201-55207400  
mytileDiff25p200.hyper\_merged\_CHG.Chr19.15264801-15265000  
mytileDiff25p200.hyper\_merged\_CHG.Chr19.15264801-15265000  
mytileDiff25p200.hyper\_merged\_CHG.Chr19.17599201-17599400  
mytileDiff25p200.hyper\_merged\_CHG.Chr19.29618801-29619000  
mytileDiff25p200.hyper\_merged\_CHG.Chr19.29615001-29615200  
mytileDiff25p200.hyper\_merged\_CHG.Chr19.34762001-34762200  
mytileDiff25p200.hyper\_merged\_CHG.Chr19.37813001-37813200  
mytileDiff25p200.hyper\_merged\_CHG.Chr19.46795601-46795800  
mytileDiff25p200.hyper\_merged\_CHG.Chr19.50420801-50421000  
mytileDiff25p200.hyper\_merged\_CHG.Chr20.11813001-11813200

mytileDiff25p200.hyper\_merged\_CHG.Chr20.11813001-11813200  
mytileDiff25p200.hyper\_merged\_CHG.Chr20.17706601-17706800  
mytileDiff25p200.hyper\_merged\_CHG.Chr20.17707601-17707800  
mytileDiff25p200.hyper\_merged\_CHG.Chr20.17707401-17707600  
mytileDiff25p200.hyper\_merged\_CHG.Chr20.17706801-17707000  
mytileDiff25p200.hyper\_merged\_CHG.Chr20.26333401-26333600  
mytileDiff25p200.hyper\_merged\_CHG.Chr20.34965401-34965600  
mytileDiff25p200.hyper\_merged\_CHG.Chr20.36220601-36220800  
mytileDiff25p200.hyper\_merged\_CHG.Chr20.36902801-36903000  
mytileDiff25p200.hyper\_merged\_CHG.Chr20.40598801-40599000  
mytileDiff25p200.hyper\_merged\_CHG.Chr20.40598801-40599000  
mytileDiff25p200.hyper\_merged\_CHG.Chr20.41772801-41773000  
mytileDiff25p200.hyper\_merged\_CHG.Chr20.44441801-44442000  
mytileDiff25p200.hyper\_merged\_CHG.Chr20.47540201-47540400  
mytileDiff25p200.hyper\_merged\_CHG.scaffold\_197.12001-12200  
mytileDiff25p200.hyper\_merged\_CHG.scaffold\_28.78801-79000  
mytileDiff25p200.hyper\_merged\_CHG.scaffold\_361.7201-7400

---

**in CHG context.**

| <b>REGION</b>                     | <b>GENE ID</b>  | <b>GENE ANNOT</b> |
|-----------------------------------|-----------------|-------------------|
| PROMOTER                          | Glyma.01G031200 | N/A               |
| GENE BODY                         | Glyma.01G036200 | RNI-like super    |
| GENE BODY                         | Glyma.01G073400 | SNF2 domain       |
| GENE BODY                         | Glyma.01G092400 | tRNA arginine     |
| GENE BODY                         | Glyma.01G093200 | Metal-depend      |
| GENE BODY                         | Glyma.01G115300 | Plant protein     |
| GENE BODY                         | Glyma.01G177700 | aminopeptidase    |
| GENE BODY                         | Glyma.01G209300 | RGPR-related      |
| GENE BODY                         | Glyma.01G241300 | target of rapa    |
| GENE BODY                         | Glyma.02G041800 | disease resist    |
| GENE BODY                         | Glyma.02G051700 | beta-galactos     |
| GENE BODY                         | Glyma.02G094200 | mitochondria      |
| GENE BODY                         | Glyma.02G097900 | bZIP transcrip    |
| PROMOTER                          | Glyma.02G119900 | N/A               |
| PROMOTER                          | Glyma.02G129000 | ARM repeat s      |
| GENE BODY                         | Glyma.02G129400 | N/A               |
| GENE BODY                         | Glyma.02G130400 | Chalcone and      |
| GENE BODY                         | Glyma.02G137000 | 5\'-3\' exonuc    |
| GENE BODY                         | Glyma.02G162300 | protein kinase    |
| GENE BODY                         | Glyma.02G165800 | Protein kinase    |
| GENE BODY                         | Glyma.02G169200 | protein phosph    |
| GENE BODY                         | Glyma.02G170100 | Phosphofruct      |
| GENE BODY                         | Glyma.02G188900 | AGAMOUS-lik       |
| PROMOTER                          | Glyma.02G190100 | amino acid pe     |
| PROMOTER                          | Glyma.02G203000 | C-terminal do     |
| PROMOTER                          | Glyma.02G215200 | Restriction er    |
| PROMOTER(3bp) ; GENE BODY (197bp) | Glyma.02G252400 | beta HLH pro      |
| PROMOTER                          | Glyma.02G291300 | calmodulin-d      |
| GENE BODY                         | Glyma.03G008100 | cytochrome P      |
| GENE BODY                         | Glyma.03G014400 | NAD(P)-bindi      |
| GENE BODY                         | Glyma.03G052800 | Disease resist    |
| GENE BODY                         | Glyma.03G059100 | nodulin MtN2      |
| GENE BODY                         | Glyma.03G061000 | glycoprotease     |
| PROMOTER                          | Glyma.03G101500 | N/A               |
| GENE BODY                         | Glyma.03G102100 | IQ-domain 18      |
| GENE BODY                         | Glyma.03G133000 | RECA homolo       |
| PROMOTER (102bp); 5'UTR (98bp)    | Glyma.03G141100 | N/A               |
| GENE BODY                         | Glyma.04G089400 | N/A               |
| PROMOTER                          | Glyma.04G129400 | N/A               |
| GENE BODY                         | Glyma.04G135000 | nudix hydrola     |
| GENE BODY                         | Glyma.04G138200 | glutathione S-    |

|                                    |                 |                |
|------------------------------------|-----------------|----------------|
| GENE BODY                          | Glyma.04G155100 | FAD/NAD(P)-l   |
| 3'UTR                              | Glyma.04G162800 | gamma subur    |
| GENE BODY                          | Glyma.04G211000 | Copine (Calci  |
| GENE BODY                          | Glyma.04G256700 | O-fucosyltran  |
| PROMOTER                           | Glyma.05G058200 | YbaK/aminoa    |
| 3'UTR (138bp)                      | Glyma.05G067200 | Histone H3 K4  |
| GENE BODY                          | Glyma.05G084600 | N/A            |
| 3'UTR                              | Glyma.05G096300 | FMN-linked o   |
| GENE BODY                          | Glyma.05G209500 | ARID/BRIGHT    |
| GENE BODY                          | Glyma.06G011200 | Arabidopsis p  |
| GENE BODY                          | Glyma.06G094900 | transducin fa  |
| GENE BODY                          | Glyma.06G096100 | MSCS-like 2    |
| GENE BODY                          | Glyma.06G217200 | Peptidase C1:  |
| GENE BODY                          | Glyma.06G217700 | nucleoporin-r  |
| GENE BODY (72bp); 3'UTR (128bp)    | Glyma.06G222100 | Protein of unl |
| GENE BODY                          | Glyma.06G225200 | Integrase-ty   |
| PROMOTER                           | Glyma.06G233300 | PHD finger fa  |
| GENE BODY                          | Glyma.06G239100 | Nuclear pore   |
| GENE BODY                          | Glyma.06G258100 | S-locus lectin |
| GENE BODY (47bp); 3'UTR (153bp)    | Glyma.07G014300 | phosphofru     |
| GENE BODY                          | Glyma.07G059800 | glyoxylate rec |
| GENE BODY                          | Glyma.07G098900 | N/A            |
| PROMOTER                           | Glyma.07G099000 | N/A            |
| GENE BODY                          | Glyma.07G157400 | SU(VAR)3-9 h   |
| PROMOTER                           | Glyma.07G181500 | Chaperone Di   |
| GENE BODY                          | Glyma.07G201000 | N/A            |
| PROMOTER (98bp); GENE BODY (102bp) | Glyma.08G054200 | HMG (high m    |
| GENE BODY                          | Glyma.08G060800 | receptor kina  |
| GENE BODY                          | Glyma.08G071400 | HXXXD-type a   |
| GENE BODY                          | Glyma.08G195900 | ubiquitin-spe  |
| GENE BODY                          | Glyma.08G253800 | DNA/RNA pol    |
| PROMOTER                           | Glyma.08G277400 | PIF1 helicase  |
| GENE BODY                          | Glyma.08G337400 | Transducin/W   |
| GENE BODY                          | Glyma.09G084300 | Outer arm dy   |
| GENE BODY                          | Glyma.09G104600 | SET domain p   |
| GENE BODY                          | Glyma.09G106000 | Nucleic acid-k |
| 3'UTR (109bp); GENE BODY (3bp)     | Glyma.09G107500 | N/A            |
| GENE BODY                          | Glyma.09G108300 | N/A            |
| GENE BODY                          | Glyma.09G131700 | N/A            |
| GENE BODY                          | Glyma.10G053600 | Pyridoxal-dep  |
| GENE BODY                          | Glyma.10G104900 | ARM repeat s   |
| GENE BODY                          | Glyma.10G116500 | Protein of unl |
| GENE BODY                          | Glyma.10G118100 | Protein kinas  |



|                                |                 |                |
|--------------------------------|-----------------|----------------|
| GENE BODY                      | Glyma.10G124700 | peroxisomal ε  |
| PROMOTER                       | Glyma.10G166200 | RNA-binding (  |
| GENE BODY                      | Glyma.10G172400 | ubiquitin-spe  |
| GENE BODY                      | Glyma.10G188600 | TRAF-like sup  |
| GENE BODY                      | Glyma.11G067000 | SET domain-c   |
| GENE BODY                      | Glyma.11G092100 | Major facilita |
| GENE BODY                      | Glyma.11G158400 | AICARFT/IMP    |
| GENE BODY                      | Glyma.11G166200 | N/A            |
| PROMOTER                       | Glyma.11G190400 | Lecithin:chole |
| GENE BODY                      | Glyma.11G230500 | CRINKLY4 rela  |
| GENE BODY                      | Glyma.12G044800 | AAA-type ATF   |
| GENE BODY                      | Glyma.12G052400 | protein kinase |
| GENE BODY                      | Glyma.12G139700 | Uncharacteris  |
| GENE BODY                      | Glyma.12G139800 | Uncharacteris  |
| GENE BODY                      | Glyma.12G139900 | isoprenoid F   |
| GENE BODY                      | Glyma.12G149800 | Quinone redu   |
| PROMOTER                       | Glyma.12G154900 | N/A            |
| PROMOTER                       | Glyma.12G155000 | N/A            |
| GENE BODY                      | Glyma.12G223200 | Plasma-meml    |
| PROMOTER                       | Glyma.13G010300 | PIF1 helicase  |
| GENE BODY                      | Glyma.13G024700 | 2-isopropylm:  |
| GENE BODY                      | Glyma.13G030600 | P-loop contai  |
| GENE BODY                      | Glyma.13G045400 | phosphoglyce   |
| PROMOTER                       | Glyma.13G110100 | N/A            |
| GENE BODY (29bp); 3'UTR (84bp) | Glyma.13G150800 | N/A            |
| GENE BODY                      | Glyma.13G167000 | receptor-like  |
| PROMOTER                       | Glyma.13G222200 | Protein of unl |
| PROMOTER (167bp); 5'UTR (33bp) | Glyma.13G320700 | ARM repeat s   |
| GENE BODY                      | Glyma.13G372100 | cation exchar  |
| GENE BODY                      | Glyma.14G112200 | TRS120         |
| GENE BODY                      | Glyma.14G129900 | ArfGap/RecO    |
| 3'UTR                          | Glyma.14G143000 | ENTH/VHS/G     |
| PROMOTER                       | Glyma.14G174100 | copper ion bi  |
| GENE BODY                      | Glyma.14G198500 | exocyst subur  |
| PROMOTER (63bp); 5'UTR (137bp) | Glyma.14G199800 | WRKY DNA-bi    |
| GENE BODY                      | Glyma.15G000900 | P-loop contai  |
| GENE BODY                      | Glyma.15G177000 | Mob1/phocei    |
| GENE BODY                      | Glyma.15G179700 | zinc ion bindi |
| GENE BODY                      | Glyma.15G213200 | cyclophilin 59 |
| PROMOTER                       | Glyma.15G214600 | ARM repeat s   |
| GENE BODY                      | Glyma.15G236100 | Major facilita |
| GENE BODY                      | Glyma.15G249000 | RING/U-box s   |
| PROMOTER                       | Glyma.15G274500 | TTF-type zinc  |

|                                    |                 |                 |
|------------------------------------|-----------------|-----------------|
| GENE BODY                          | Glyma.15G275400 | Pectin lyase-li |
| GENE BODY                          | Glyma.15G276800 | magnesium ic    |
| GENE BODY                          | Glyma.15G276800 | magnesium ic    |
| PROMOTER                           | Glyma.16G005000 | N/A             |
| GENE BODY                          | Glyma.16G101500 | yeast YAK1-re   |
| GENE BODY                          | Glyma.16G101500 | yeast YAK1-re   |
| 5'UTR                              | Glyma.16G101700 | N/A             |
| GENE BODY                          | Glyma.16G150900 | TatD related I  |
| PROMOTER                           | Glyma.16G181400 | NAD(P)-bindi    |
| GENE BODY                          | Glyma.16G184200 | disease resist  |
| GENE BODY                          | Glyma.16G186600 | disease resist  |
| GENE BODY                          | Glyma.16G192800 | disease resist  |
| GENE BODY                          | Glyma.17G068600 | Alg9-like man   |
| GENE BODY                          | Glyma.17G104100 | dicer-like 4    |
| GENE BODY                          | Glyma.17G104100 | dicer-like 4    |
| PROMOTER                           | Glyma.17G117100 | early nodulin-  |
| GENE BODY (122bp); 3'UTR (78bp)    | Glyma.17G135200 | Class I peptid  |
| GENE BODY                          | Glyma.17G141300 | protein argini  |
| GENE BODY                          | Glyma.17G172700 | PLC-like phos   |
| PROMOTER (87bp); GENE BODY (113bp) | Glyma.17G198200 | Mitochondria    |
| GENE BODY                          | Glyma.17G204200 | phytochrome     |
| 5'UTR                              | Glyma.17G247000 | N/A             |
| GENE BODY                          | Glyma.17G247100 | N/A             |
| PROMOTER                           | Glyma.18G047900 | nodulin MtN2    |
| GENE BODY                          | Glyma.18G126000 | N/A             |
| GENE BODY                          | Glyma.18G132200 | DEA(D/H)-bo     |
| GENE BODY                          | Glyma.18G137800 | Radical SAM s   |
| PROMOTER                           | Glyma.18G137900 | hAT transpos    |
| PROMOTER (5bp); GENE BODY (195bp)  | Glyma.18G163600 | N/A             |
| GENE BODY                          | Glyma.18G184400 | Sulfite export  |
| GENE BODY                          | Glyma.18G196200 | mRNA cappin     |
| GENE BODY                          | Glyma.18G223300 | WD-40 repea     |
| GENE BODY                          | Glyma.18G268000 | Leucine-rich r  |
| GENE BODY                          | Glyma.19G064200 | N/A             |
| 5'UTR                              | Glyma.19G064300 | N/A             |
| GENE BODY                          | Glyma.19G065700 | Got1/Sft2-like  |
| GENE BODY                          | Glyma.19G081600 | alpha/beta-H    |
| GENE BODY                          | Glyma.19G081600 | alpha/beta-H    |
| 3'UTR                              | Glyma.19G100500 | N/A             |
| GENE BODY                          | Glyma.19G120400 | 2-isopropylm    |
| PROMOTER                           | Glyma.19G214900 | myb domain j    |
| GENE BODY                          | Glyma.19G261100 | pyrophospho     |
| GENE BODY                          | Glyma.20G052100 | N/A             |

|                                 |                 |                |
|---------------------------------|-----------------|----------------|
| GENE BODY                       | Glyma.20G052200 | N/A            |
| GENE BODY                       | Glyma.20G058500 | N/A            |
| GENE BODY                       | Glyma.20G074000 | urease access  |
| GENE BODY                       | Glyma.20G106900 | translation in |
| GENE BODY                       | Glyma.20G119300 | Protein kinase |
| GENE BODY (49bp); 3'UTR (151bp) | Glyma.20G126800 | Cyclase family |
| GENE BODY                       | Glyma.20G168100 | ribosomal pro  |
| PROMOTER                        | Glyma.20G168300 | Protein of unl |
| PROMOTER                        | Glyma.20G179900 | phosphogluc    |
| 3'UTR                           | Glyma.20G207700 | COP1-interac   |
| GENE BODY                       | Glyma.20G244900 | glucan syntha  |
| GENE BODY                       | Glyma.U008400   | carboxyl terr  |
| GENE BODY                       | Glyma.U028800   | N/A            |
| GENE BODY                       | Glyma.U036800   | GroES-like zin |

---

| FUNCTION                                | % Methylation Difference | q value    | P value     |
|-----------------------------------------|--------------------------|------------|-------------|
|                                         | 75.92105263              | 5.0649E-06 | 2.03203E-09 |
| family protein                          | 79.48717949              | 0.00129483 | 2.02341E-06 |
| -containing protein / helicase domain   | 72.72727273              | 0.00560967 | 1.56869E-05 |
| adenosine deaminase                     | 90                       | 0.009452   | 3.40217E-05 |
| ident phosphohydrolase                  | 56.48351648              | 0.00311923 | 6.7176E-06  |
| of unknown function (DUF247)            | 62.5                     | 0.00013589 | 1.07333E-07 |
| ase P1                                  | 55.93220339              | 0.00309595 | 6.61666E-06 |
|                                         | 65                       | 0.00215992 | 4.06449E-06 |
| mycin                                   | 29.7228895               | 0.00014026 | 1.11525E-07 |
| ance protein (TIR-NBS-LRR class), put   | 49.67479675              | 0.00645638 | 1.94615E-05 |
| idase 3                                 | 34.48275862              | 0.00043339 | 4.69811E-07 |
| l editing factor 22                     | 54.98502994              | 5.1271E-08 | 1.04358E-11 |
| tion factor family protein              | 68.80503145              | 0.00123202 | 1.8929E-06  |
|                                         | 60                       | 0.00366275 | 8.39622E-06 |
| uperfamily protein                      | 67.77939042              | 0.00431722 | 1.06809E-05 |
|                                         | 33.33333333              | 0.00065756 | 8.02622E-07 |
| stilbene synthase family protein        | 68.75                    | 1.7072E-06 | 5.784E-10   |
| lease family protein                    | 29.12280702              | 0.00596037 | 1.71725E-05 |
| e family protein / protein phosphatas   | 80                       | 0.00397247 | 9.44718E-06 |
| e superfamily protein                   | 28.03462885              | 0.00035602 | 3.65834E-07 |
| hatase 2A-4                             | 32.10052157              | 0.00013261 | 1.04313E-07 |
| okinase family protein                  | 38.91159939              | 6.7416E-09 | 1.10661E-12 |
| ce 80                                   | 26.39573071              | 0.00371452 | 8.59229E-06 |
| ermease 3                               | 40.53905391              | 0.00016466 | 1.37101E-07 |
| main phosphatase-like 4                 | 36.78215472              | 0.00137745 | 2.20316E-06 |
| idonuclease, type II-like superfamily p | 32.09690807              | 7.294E-07  | 2.17429E-10 |
| tein 93                                 | 45.60606061              | 0.00030648 | 3.01246E-07 |
| omain protein kinase 9                  | 92.85714286              | 0.0027502  | 5.60865E-06 |
| 450, family 86, subfamily A, polypep    | 53.46594334              | 0.00255424 | 5.07318E-06 |
| ng Rossmann-fold superfamily protei     | 34.44444444              | 0.00177142 | 3.08453E-06 |
| ance protein (TIR-NBS-LRR class) fam    | 35.86956522              | 0.00484275 | 1.26584E-05 |
| 1 /EamA-like transporter family prot    | 29.95728155              | 0.00324929 | 7.10975E-06 |
| e 1                                     | 46.17034314              | 1.2239E-05 | 5.76987E-09 |
|                                         | 27.65557643              | 0.00016611 | 1.39389E-07 |
| ;                                       | 29.63015246              | 0.00070553 | 8.81092E-07 |
| g 3                                     | 38.49486521              | 3.8719E-05 | 2.31901E-08 |
|                                         | 100                      | 3.6419E-07 | 9.73494E-11 |
|                                         | 26.60215054              | 0.00097008 | 1.34522E-06 |
|                                         | 37.69230769              | 0.00939472 | 3.35379E-05 |
| ise homolog 16                          | 41.41824752              | 0.00288881 | 6.01456E-06 |
| -transferase THETA 1                    | 46.90635452              | 0.00939364 | 3.35279E-05 |

|                                              |             |            |             |
|----------------------------------------------|-------------|------------|-------------|
| binding oxidoreductase family protein        | 31.57208089 | 0.00876582 | 3.02281E-05 |
| unit of Mt ATP synthase                      | 90          | 0.009452   | 3.40217E-05 |
| REGION                                       | 30.52691867 | 0.00495282 | 1.30818E-05 |
| transferase family protein                   | 64.54545455 | 0.00099763 | 1.40074E-06 |
| cyl-tRNA synthetase-associated domain        | 72.68009768 | 4.6825E-13 | 3.03809E-17 |
| 4-specific methyltransferase SET7/9 family   | 30.24509804 | 0.00676112 | 2.07314E-05 |
|                                              | 54.17909575 | 3.6201E-23 | 3.56536E-28 |
| oxidoreductases superfamily protein          | 39.17349727 | 0.00174622 | 3.03147E-06 |
| DNA-binding domain;ELM2 domain protein       | 28.44082036 | 0.00106192 | 1.54507E-06 |
| protein of unknown function (DUF241)         | 39.68957871 | 0.0019817  | 3.62823E-06 |
| family protein / WD-40 repeat family protein | 34.02808249 | 0.00850822 | 2.89711E-05 |
|                                              | 31.14540866 | 6.8399E-09 | 1.13174E-12 |
| 3 family                                     | 25.59348529 | 0.00188997 | 3.39864E-06 |
| related                                      | 30.39688925 | 0.00103856 | 1.48792E-06 |
| known function (DUF3414)                     | 29.41176471 | 0.00771569 | 2.5087E-05  |
| the DNA-binding superfamily protein          | 27.41318891 | 0.00375979 | 8.72909E-06 |
| family protein / bromo-adjacent homology     | 62.62745098 | 2.0002E-06 | 6.93419E-10 |
| complex protein                              | 48.11594203 | 0.00196426 | 3.58034E-06 |
| protein kinase family protein                | 58.40727595 | 5.9606E-08 | 1.24846E-11 |
| kinase 3                                     | 60.53030303 | 0.00497106 | 1.31504E-05 |
| lactase 1                                    | 46.94656489 | 0.00558662 | 1.55711E-05 |
|                                              | 65.57377049 | 0.00218428 | 4.13792E-06 |
|                                              | 65.57377049 | 0.00218428 | 4.13792E-06 |
| homolog 9                                    | 29.35613682 | 0.00390898 | 9.21406E-06 |
| naJ-domain superfamily protein               | 30.70588235 | 0.00626901 | 1.85891E-05 |
|                                              | 38.34512023 | 5.569E-06  | 2.28167E-09 |
| mobility group) box protein with ARID/       | 82.35294118 | 0.0007888  | 1.02441E-06 |
| case 3                                       | 70.33898305 | 0.00522065 | 1.40632E-05 |
| acyl-transferase family protein              | 40.67085954 | 0.00235172 | 4.57212E-06 |
| specific protease 6                          | 41.23861566 | 0.00720248 | 2.26191E-05 |
| lymerases superfamily protein                | 82.57359924 | 8.0372E-11 | 8.17955E-15 |
|                                              | 69.75524476 | 0.00762124 | 2.46298E-05 |
| WD40 repeat-like superfamily protein         | 40          | 0.00922614 | 3.26151E-05 |
| nein light chain 1 protein                   | 35.11705686 | 0.00874999 | 3.01448E-05 |
| protein 38                                   | 33.61210673 | 0.00029319 | 2.85437E-07 |
| binding, OB-fold-like protein                | 74.87179487 | 0.00217549 | 4.10522E-06 |
|                                              | 65          | 0.00924262 | 3.27037E-05 |
|                                              | 25.89561738 | 0.0090487  | 3.17324E-05 |
|                                              | 43.38413331 | 4.2986E-05 | 2.62769E-08 |
| pendent decarboxylase family protein         | 53.37209302 | 0.00040327 | 4.27893E-07 |
| superfamily protein                          | 34.81481481 | 0.00290234 | 6.05423E-06 |
| known function (DUF155)                      | 26.36394252 | 0.0034899  | 7.89856E-06 |
| ase family protein with ARM repeat domain    | 32.13414634 | 0.00153952 | 2.55235E-06 |

|                                        |             |            |             |
|----------------------------------------|-------------|------------|-------------|
| 3-ketoacyl-CoA thiolase 3              | 78.81578947 | 0.00019181 | 1.66495E-07 |
| (RRM/RBD/RNP motifs) family protein    | 35.88199265 | 0.00024484 | 2.28763E-07 |
| cific protease 9                       | 25.4854713  | 0.00806387 | 2.67181E-05 |
| erfamily protein                       | 42.03931204 | 0.00560042 | 1.5639E-05  |
| ontaining protein                      | 36.09460279 | 3.7402E-05 | 2.21755E-08 |
| tor superfamily protein                | 29.7399605  | 0.0004227  | 4.535E-07   |
| CHase bienzyme family protein          | 60.60606061 | 4.2808E-11 | 4.04744E-15 |
|                                        | 31.2307261  | 0.00380173 | 8.86282E-06 |
| sterol acyltransferase family protein  | 36.81006494 | 0.00640756 | 1.92434E-05 |
| ated 3                                 | 26.5625     | 0.00235805 | 4.58753E-06 |
| ase family protein                     | 38.21428571 | 0.00063147 | 7.59989E-07 |
| e family protein                       | 50          | 2.5504E-06 | 9.07631E-10 |
| sed conserved protein (UCP012943)      | 36.23188406 | 1.9331E-08 | 3.56651E-12 |
| sed conserved protein (UCP012943)      | 36.23188406 | 1.9331E-08 | 3.56651E-12 |
|                                        | 36.23188406 | 1.9331E-08 | 3.56651E-12 |
| ctase family protein                   | 40.74074074 | 0.00199648 | 3.66388E-06 |
|                                        | 50          | 0.00026533 | 2.54176E-07 |
|                                        | 50          | 0.00026533 | 2.54176E-07 |
| brane choline transporter family prot  | 29.65772433 | 5.2287E-05 | 3.37815E-08 |
|                                        | 49.75490196 | 0.00236413 | 4.6009E-06  |
| alate synthase 1                       | 34.35143288 | 0.00756998 | 2.44045E-05 |
| ning nucleoside triphosphate hydrola   | 27.53968254 | 0.00101236 | 1.43479E-06 |
| rate kinase 1                          | 38.18466354 | 0.00121438 | 1.86021E-06 |
|                                        | 37.34939759 | 0.00227318 | 4.36869E-06 |
|                                        | 32.35294118 | 0.00903918 | 3.16585E-05 |
| protein kinase 1                       | 63.39522546 | 3.0118E-05 | 1.69259E-08 |
| known function (DUF1000)               | 35.48387097 | 0.00335014 | 7.42607E-06 |
| uperfamily protein                     | 74.63002114 | 0.00102548 | 1.46446E-06 |
| iger 2                                 | 79.90196078 | 0.00755099 | 2.42986E-05 |
|                                        | 41.15853659 | 0.00154071 | 2.55634E-06 |
| -like zinc finger domain-containing pr | 61.73076923 | 3.6775E-07 | 9.89981E-11 |
| AT family protein                      | 30.81106097 | 0.00569383 | 1.59971E-05 |
| nding;cobalt ion binding;zinc ion binc | 53.14723591 | 0.00134623 | 2.14085E-06 |
| nit exo70 family protein B1            | 26.73299101 | 0.00189116 | 3.40354E-06 |
| inding protein 4                       | 46.66666667 | 0.00100689 | 1.42073E-06 |
| ning nucleoside triphosphate hydrola   | 55.84795322 | 0.00420344 | 1.02669E-05 |
| in family protein                      | 31.42955024 | 6.5312E-05 | 4.44135E-08 |
| ng;nucleic acid binding                | 26.63851351 | 0.00231869 | 4.49351E-06 |
| )                                      | 35.36214242 | 0.006108   | 1.78304E-05 |
| uperfamily protein                     | 84.61538462 | 0.00211057 | 3.93805E-06 |
| tor superfamily protein                | 34.04761905 | 0.00464738 | 1.18792E-05 |
| uperfamily protein                     | 41.04991394 | 0.00147641 | 2.40507E-06 |
| finger protein with HAT dimerisation   | 39.39393939 | 0.00033545 | 3.40065E-07 |

|                                        |             |            |             |
|----------------------------------------|-------------|------------|-------------|
| like superfamily protein               | 26.88948716 | 1.9012E-05 | 9.74922E-09 |
| on binding;thiamin pyrophosphate bi    | 60.90909091 | 0.00745371 | 2.38277E-05 |
| on binding;thiamin pyrophosphate bi    | 26.07551487 | 0.00415639 | 1.00756E-05 |
|                                        | 37.9273377  | 0.00039841 | 4.21849E-07 |
| elated gene 1                          | 29.41306267 | 0.00213409 | 3.99348E-06 |
| elated gene 1                          | 37.68684146 | 0.00023582 | 2.18162E-07 |
|                                        | 29.41306267 | 0.00213409 | 3.99348E-06 |
| DNase                                  | 27.64804003 | 0.0011133  | 1.64909E-06 |
| ng Rossmann-fold superfamily protei    | 44.68438538 | 1.8887E-06 | 6.46087E-10 |
| ance family protein / LRR family prot  | 31.52856408 | 0.00848311 | 2.88744E-05 |
| ance family protein / LRR family prot  | 43.96551724 | 0.008645   | 2.96312E-05 |
| ance family protein / LRR family prot  | 28.98351648 | 0.00063614 | 7.67704E-07 |
| nosyltransferase family                | 69.78609626 | 0.00302238 | 6.39273E-06 |
|                                        | 26.52358691 | 0.00011217 | 8.58726E-08 |
|                                        | 29.53384419 | 0.00435313 | 1.08326E-05 |
| -related                               | 55          | 1.5811E-07 | 3.78928E-11 |
| e chain release factor                 | 76.4516129  | 0.00054854 | 6.28491E-07 |
| ne methyltransferase 7                 | 90.90909091 | 0.009452   | 3.40217E-05 |
| phodiesterases superfamily protein     | 28.39068826 | 0.00067357 | 8.25254E-07 |
| l substrate carrier family protein     | 44.91869919 | 0.00747495 | 2.39165E-05 |
| interacting factor 3                   | 90.90909091 | 0.009452   | 3.40217E-05 |
|                                        | 38.09195402 | 9.5509E-07 | 2.92228E-10 |
|                                        | 38.09195402 | 9.5509E-07 | 2.92228E-10 |
| !1 /EamA-like transporter family prot  | 47.60273973 | 0.00787429 | 2.57929E-05 |
|                                        | 76.30136986 | 0.00150212 | 2.46865E-06 |
| κ RNA helicase family protein          | 28.50980392 | 0.00265997 | 5.36877E-06 |
| superfamily protein                    | 32.82940361 | 0.0039001  | 9.18033E-06 |
| on superfamily                         | 32.82940361 | 0.0039001  | 9.18033E-06 |
|                                        | 80          | 0.00223914 | 4.27826E-06 |
| er TauE/SafE family protein            | 27.13503838 | 2.704E-07  | 6.88859E-11 |
| g enzyme family protein                | 49.24098672 | 0.00989921 | 3.66128E-05 |
| t family protein / beige-related       | 75.47619048 | 0.0008398  | 1.10446E-06 |
| repeat receptor-like protein kinase fa | 30.48780488 | 0.00419474 | 1.02292E-05 |
|                                        | 29.73402476 | 0.00023551 | 2.17264E-07 |
|                                        | 29.73402476 | 0.00023551 | 2.17264E-07 |
| vesicle transport protein family       | 76.29233512 | 9.8817E-05 | 7.38359E-08 |
| ydrolases superfamily protein          | 65.90909091 | 0.00574888 | 1.6271E-05  |
| ydrolases superfamily protein          | 55.51971326 | 2.0344E-05 | 1.05524E-08 |
|                                        | 25.95070423 | 0.00067681 | 8.329E-07   |
| alate synthase 1                       | 40          | 0.00936987 | 3.33939E-05 |
| protein 12                             | 60.15037594 | 0.00018131 | 1.5571E-07  |
| rylase 3                               | 30.53167421 | 0.00042586 | 4.58862E-07 |
|                                        | 29.86111111 | 0.00029715 | 2.89927E-07 |

|                                         |             |            |             |
|-----------------------------------------|-------------|------------|-------------|
|                                         | 29.86111111 | 0.00029715 | 2.89927E-07 |
|                                         | 29.75663267 | 0.00016835 | 1.41933E-07 |
|                                         | 27.41523734 | 4.2188E-06 | 1.62875E-09 |
|                                         | 26.71641791 | 0.00932889 | 3.31866E-05 |
|                                         | 26.52051783 | 0.00014472 | 1.16209E-07 |
| ory protein D                           | 63.33333333 | 0.00933335 | 3.32147E-05 |
| itiation factor 3 (IF-3) family protein | 38.83888389 | 0.00346193 | 7.7966E-06  |
| e superfamily protein                   | 28.09044397 | 0.00545066 | 1.50053E-05 |
| y protein                               | 87.01298701 | 2.2302E-14 | 1.01038E-18 |
| rotein 1                                | 65.30612245 | 0.00324597 | 7.09286E-06 |
| known function (DUF1278)                | 65.30612245 | 0.00324597 | 7.09286E-06 |
| osamine mutase family protein           | 33.45079967 | 0.00420225 | 1.02613E-05 |
| REGION                                  | 59.04761905 | 0.00593636 | 1.70448E-05 |
| ise-like 10                             | 32.58444619 | 0.00284059 | 5.86574E-06 |
| inus of HSC70-interacting protein       | 54          | 4.20E-05   | 2.55E-08    |
|                                         | 74.46808511 | 0.00040356 | 4.29E-07    |
| ic-binding dehydrogenase family prot    | 37.23522854 | 0.00967046 | 3.53E-05    |

---



**Supplemental Table 4: List of 120 hyper-methylated genes in (**  
**METHYLATED REGION**

---

mytileDiff25p200.hyper\_merged\_CHH.Chr01.3576801-3577000  
mytileDiff25p200.hyper\_merged\_CHH.Chr01.11564801-11565000  
mytileDiff25p200.hyper\_merged\_CHH.Chr01.37634201-37634400  
mytileDiff25p200.hyper\_merged\_CHH.Chr01.48025201-48025400  
mytileDiff25p200.hyper\_merged\_CHH.Chr01.51017001-51017200  
mytileDiff25p200.hyper\_merged\_CHH.Chr02.7246401-7246600  
mytileDiff25p200.hyper\_merged\_CHH.Chr02.7246401-7246600  
mytileDiff25p200.hyper\_merged\_CHH.Chr02.11742001-11742200  
mytileDiff25p200.hyper\_merged\_CHH.Chr02.12151801-12152000  
mytileDiff25p200.hyper\_merged\_CHH.Chr02.14365201-14365400  
mytileDiff25p200.hyper\_merged\_CHH.Chr02.14631601-14631800  
mytileDiff25p200.hyper\_merged\_CHH.Chr02.33475001-33475200  
mytileDiff25p200.hyper\_merged\_CHH.Chr02.35782801-35783000  
mytileDiff25p200.hyper\_merged\_CHH.Chr02.44605001-44605200  
mytileDiff25p200.hyper\_merged\_CHH.Chr03.1372601-1372800  
mytileDiff25p200.hyper\_merged\_CHH.Chr03.1440001-1440200  
mytileDiff25p200.hyper\_merged\_CHH.Chr03.7315801-7316000  
mytileDiff25p200.hyper\_merged\_CHH.Chr03.33605201-33605400  
mytileDiff25p200.hyper\_merged\_CHH.Chr03.37332401-37332600  
mytileDiff25p200.hyper\_merged\_CHH.Chr03.41763001-41763200  
mytileDiff25p200.hyper\_merged\_CHH.Chr03.43910201-43910400  
mytileDiff25p200.hyper\_merged\_CHH.Chr04.1509401-1509600  
mytileDiff25p200.hyper\_merged\_CHH.Chr04.26353201-26353400  
mytileDiff25p200.hyper\_merged\_CHH.Chr04.40387401-40387600  
mytileDiff25p200.hyper\_merged\_CHH.Chr04.44913401-44913600  
mytileDiff25p200.hyper\_merged\_CHH.Chr04.50068001-50068200  
mytileDiff25p200.hyper\_merged\_CHH.Chr05.827601-827800  
mytileDiff25p200.hyper\_merged\_CHH.Chr05.3956401-3956600  
mytileDiff25p200.hyper\_merged\_CHH.Chr06.1538601-1538800  
mytileDiff25p200.hyper\_merged\_CHH.Chr06.4642801-4643000  
mytileDiff25p200.hyper\_merged\_CHH.Chr06.4644001-4644200  
mytileDiff25p200.hyper\_merged\_CHH.Chr06.7657801-7658000  
mytileDiff25p200.hyper\_merged\_CHH.Chr06.14400801-14401000  
mytileDiff25p200.hyper\_merged\_CHH.Chr06.17519401-17519600  
mytileDiff25p200.hyper\_merged\_CHH.Chr06.29811601-29811800  
mytileDiff25p200.hyper\_merged\_CHH.Chr06.45214601-45214800  
mytileDiff25p200.hyper\_merged\_CHH.Chr06.49391601-49391800  
mytileDiff25p200.hyper\_merged\_CHH.Chr06.50869201-50869400  
mytileDiff25p200.hyper\_merged\_CHH.Chr07.2389001-2389200

mytileDiff25p200.hyper\_merged\_CHH.Chr07.4401201-4401400  
mytileDiff25p200.hyper\_merged\_CHH.Chr07.5072401-5072600  
mytileDiff25p200.hyper\_merged\_CHH.Chr07.18423201-18423400  
mytileDiff25p200.hyper\_merged\_CHH.Chr07.36876001-36876200  
mytileDiff25p200.hyper\_merged\_CHH.Chr08.4184001-4184200  
mytileDiff25p200.hyper\_merged\_CHH.Chr08.5477201-5477400  
mytileDiff25p200.hyper\_merged\_CHH.Chr08.6171001-6171200  
mytileDiff25p200.hyper\_merged\_CHH.Chr08.16957201-16957400  
mytileDiff25p200.hyper\_merged\_CHH.Chr08.35694401-35694600  
mytileDiff25p200.hyper\_merged\_CHH.Chr08.43422601-43422800  
mytileDiff25p200.hyper\_merged\_CHH.Chr08.46014801-46015000  
mytileDiff25p200.hyper\_merged\_CHH.Chr09.25018801-25019000  
mytileDiff25p200.hyper\_merged\_CHH.Chr09.25017201-25017400  
mytileDiff25p200.hyper\_merged\_CHH.Chr09.38048001-38048200  
mytileDiff25p200.hyper\_merged\_CHH.Chr09.42224801-42225000  
mytileDiff25p200.hyper\_merged\_CHH.Chr09.42224801-42225000  
mytileDiff25p200.hyper\_merged\_CHH.Chr09.43413401-43413600  
mytileDiff25p200.hyper\_merged\_CHH.Chr09.46321401-46321600  
mytileDiff25p200.hyper\_merged\_CHH.Chr10.3980401-3980600  
mytileDiff25p200.hyper\_merged\_CHH.Chr10.3980401-3980600  
mytileDiff25p200.hyper\_merged\_CHH.Chr10.40783601-40783800  
mytileDiff25p200.hyper\_merged\_CHH.Chr10.41859001-41859200  
mytileDiff25p200.hyper\_merged\_CHH.Chr11.523401-523600  
mytileDiff25p200.hyper\_merged\_CHH.Chr11.3373601-3373800  
mytileDiff25p200.hyper\_merged\_CHH.Chr11.7364801-7365000  
mytileDiff25p200.hyper\_merged\_CHH.Chr11.9427601-9427800  
mytileDiff25p200.hyper\_merged\_CHH.Chr11.9498601-9498800  
mytileDiff25p200.hyper\_merged\_CHH.Chr11.11475401-11475600  
mytileDiff25p200.hyper\_merged\_CHH.Chr12.33209001-33209200  
mytileDiff25p200.hyper\_merged\_CHH.Chr12.39225601-39225800  
mytileDiff25p200.hyper\_merged\_CHH.Chr13.16507401-16507600  
mytileDiff25p200.hyper\_merged\_CHH.Chr13.20839601-20839800  
mytileDiff25p200.hyper\_merged\_CHH.Chr13.25169801-25170000  
mytileDiff25p200.hyper\_merged\_CHH.Chr13.29481601-29481800  
mytileDiff25p200.hyper\_merged\_CHH.Chr13.38947001-38947200  
mytileDiff25p200.hyper\_merged\_CHH.Chr13.41123601-41123800  
mytileDiff25p200.hyper\_merged\_CHH.Chr13.41434601-41434800  
mytileDiff25p200.hyper\_merged\_CHH.Chr14.5290601-5290800  
mytileDiff25p200.hyper\_merged\_CHH.Chr14.12025001-12025200  
mytileDiff25p200.hyper\_merged\_CHH.Chr14.17975801-17976000  
mytileDiff25p200.hyper\_merged\_CHH.Chr14.22504801-22505000

mytileDiff25p200.hyper\_merged\_CHH.Chr14.27585201-27585400  
mytileDiff25p200.hyper\_merged\_CHH.Chr14.32298601-32298800  
mytileDiff25p200.hyper\_merged\_CHH.Chr15.739801-740000  
mytileDiff25p200.hyper\_merged\_CHH.Chr15.1199001-1199200  
mytileDiff25p200.hyper\_merged\_CHH.Chr15.1595201-1595400  
mytileDiff25p200.hyper\_merged\_CHH.Chr15.3692201-3692400  
mytileDiff25p200.hyper\_merged\_CHH.Chr15.5733001-5733200  
mytileDiff25p200.hyper\_merged\_CHH.Chr15.11705801-11706000  
mytileDiff25p200.hyper\_merged\_CHH.Chr15.11993201-11993400  
mytileDiff25p200.hyper\_merged\_CHH.Chr15.15799001-15799200  
mytileDiff25p200.hyper\_merged\_CHH.Chr16.411601-411800  
mytileDiff25p200.hyper\_merged\_CHH.Chr16.3511201-3511400  
mytileDiff25p200.hyper\_merged\_CHH.Chr16.9382401-9382600  
mytileDiff25p200.hyper\_merged\_CHH.Chr16.9382401-9382600  
mytileDiff25p200.hyper\_merged\_CHH.Chr16.30418601-30418800  
mytileDiff25p200.hyper\_merged\_CHH.Chr16.33906601-33906800  
mytileDiff25p200.hyper\_merged\_CHH.Chr16.33923601-33923800  
mytileDiff25p200.hyper\_merged\_CHH.Chr17.1518001-1518200  
mytileDiff25p200.hyper\_merged\_CHH.Chr17.2263801-2264000  
mytileDiff25p200.hyper\_merged\_CHH.Chr17.5352401-5352600  
mytileDiff25p200.hyper\_merged\_CHH.Chr17.6468001-6468200  
mytileDiff25p200.hyper\_merged\_CHH.Chr17.8480801-8481000  
mytileDiff25p200.hyper\_merged\_CHH.Chr17.11555401-11555600  
mytileDiff25p200.hyper\_merged\_CHH.Chr17.11604601-11604800  
mytileDiff25p200.hyper\_merged\_CHH.Chr17.13954001-13954200  
mytileDiff25p200.hyper\_merged\_CHH.Chr17.16067801-16068000  
mytileDiff25p200.hyper\_merged\_CHH.Chr17.24470001-24470200  
mytileDiff25p200.hyper\_merged\_CHH.Chr18.6439401-6439600  
mytileDiff25p200.hyper\_merged\_CHH.Chr18.13423401-13423600  
mytileDiff25p200.hyper\_merged\_CHH.Chr18.14012801-14013000  
mytileDiff25p200.hyper\_merged\_CHH.Chr19.32021801-32022000  
mytileDiff25p200.hyper\_merged\_CHH.Chr19.36510601-36510800  
mytileDiff25p200.hyper\_merged\_CHH.Chr19.41253201-41253400  
mytileDiff25p200.hyper\_merged\_CHH.Chr19.44246401-44246600  
mytileDiff25p200.hyper\_merged\_CHH.Chr19.49013201-49013400  
mytileDiff25p200.hyper\_merged\_CHH.Chr19.50414601-50414800  
mytileDiff25p200.hyper\_merged\_CHH.Chr20.3308801-3309000  
mytileDiff25p200.hyper\_merged\_CHH.Chr20.9645801-9646000  
mytileDiff25p200.hyper\_merged\_CHH.Chr20.26329001-26329200  
mytileDiff25p200.hyper\_merged\_CHH.scaffold\_21.424201-424400  
mytileDiff25p200.hyper\_merged\_CHH.scaffold\_27.230401-230600

---

**CHH context.**

| <b>REGION</b>                      | <b>GENE ID</b>  |
|------------------------------------|-----------------|
| GENE BODY (122bp); 3'UTR (78bp)    | Glyma.01G034300 |
| PROMOTER                           | Glyma.01G068900 |
| GENE BODY                          | Glyma.01G111000 |
| PROMOTER                           | Glyma.01G145400 |
| GENE BODY                          | Glyma.01G172800 |
| GENE BODY                          | Glyma.02G083300 |
| PROMOTER                           | Glyma.02G083400 |
| PROMOTER (139bp); 5'UTR (61bp)     | Glyma.02G119200 |
| PROMOTER                           | Glyma.02G122400 |
| PROMOTER (143bp); 5'UTR (43bp); GE | Glyma.02G138700 |
| PROMOTER                           | Glyma.02G141500 |
| PROMOTER (70bp); 5'UTR (130bp)     | Glyma.02G186100 |
| GENE BODY                          | Glyma.02G190200 |
| PROMOTER                           | Glyma.02G259000 |
| GENE BODY                          | Glyma.03G013500 |
| GENE BODY                          | Glyma.03G014400 |
| GENE BODY                          | Glyma.03G054100 |
| PROMOTER                           | Glyma.03G123200 |
| PROMOTER                           | Glyma.03G157900 |
| PROMOTER                           | Glyma.03G211400 |
| GENE BODY                          | Glyma.03G240400 |
| PROMOTER                           | Glyma.04G019200 |
| PROMOTER                           | Glyma.04G144400 |
| 3'UTR                              | Glyma.04G162800 |
| 5'UTR                              | Glyma.04G182700 |
| PROMOTER                           | Glyma.04G232300 |
| PROMOTER                           | Glyma.05G009300 |
| PROMOTER                           | Glyma.05G044200 |
| PROMOTER                           | Glyma.06G020300 |
| PROMOTER                           | Glyma.06G061600 |
| GENE BODY                          | Glyma.06G061700 |
| PROMOTER                           | Glyma.06G097000 |
| 5'UTR                              | Glyma.06G172000 |
| PROMOTER (97bp); 5'UTR (103bp)     | Glyma.06G195600 |
| GENE BODY                          | Glyma.06G223900 |
| PROMOTER                           | Glyma.06G264700 |
| GENE BODY                          | Glyma.06G304900 |
| PROMOTER                           | Glyma.06G320000 |
| GENE BODY                          | Glyma.07G030000 |

|                                 |                 |
|---------------------------------|-----------------|
| GENE BODY (107bp); 3'UTR (93bp) | Glyma.07G051000 |
| PROMOTER                        | Glyma.07G057000 |
| PROMOTER                        | Glyma.07G151800 |
| PROMOTER                        | Glyma.07G200200 |
| PROMOTER                        | Glyma.08G054200 |
| GENE BODY                       | Glyma.08G071400 |
| PROMOTER                        | Glyma.08G081600 |
| PROMOTER                        | Glyma.08G209300 |
| PROMOTER                        | Glyma.08G272500 |
| GENE BODY                       | Glyma.08G314100 |
| PROMOTER                        | Glyma.08G345200 |
| GENE BODY                       | Glyma.09G115200 |
| GENE BODY                       | Glyma.09G115200 |
| GENE BODY                       | Glyma.09G157300 |
| PROMOTER (67 bp)                | Glyma.09G197500 |
| PROMOTER (19bp); 5'UTR (181bp)  | Glyma.09G197600 |
| GENE BODY                       | Glyma.09G209900 |
| PROMOTER                        | Glyma.09G240900 |
| PROMOTER                        | Glyma.10G044400 |
| PROMOTER                        | Glyma.10G044600 |
| PROMOTER (140bp); 5'UTR (60bp)  | Glyma.10G174000 |
| GENE BODY                       | Glyma.10G185600 |
| PROMOTER                        | Glyma.11G007500 |
| PROMOTER                        | Glyma.11G045500 |
| PROMOTER                        | Glyma.11G096600 |
| GENE BODY                       | Glyma.11G124000 |
| PROMOTER                        | Glyma.11G125100 |
| PROMOTER                        | Glyma.11G148800 |
| GENE BODY                       | Glyma.12G174700 |
| GENE BODY                       | Glyma.12G233100 |
| GENE BODY                       | Glyma.13G065500 |
| GENE BODY                       | Glyma.13G093300 |
| PROMOTER (145bp); 5'UTR (55bp)  | Glyma.13G139100 |
| GENE BODY                       | Glyma.13G181600 |
| PROMOTER                        | Glyma.13G289100 |
| PROMOTER                        | Glyma.13G316600 |
| GENE BODY                       | Glyma.13G319900 |
| GENE BODY                       | Glyma.14G064500 |
| PROMOTER                        | Glyma.14G109000 |
| PROMOTER                        | Glyma.14G122600 |
| PROMOTER                        | Glyma.14G131400 |

|                                  |                 |
|----------------------------------|-----------------|
| PROMOTER                         | Glyma.14G140600 |
| GENE BODY                        | Glyma.14G149700 |
| 3'UTR                            | Glyma.15G009500 |
| PROMOTER                         | Glyma.15G015100 |
| PROMOTER                         | Glyma.15G020600 |
| PROMOTER                         | Glyma.15G046400 |
| PROMOTER                         | Glyma.15G074800 |
| PROMOTER                         | Glyma.15G142800 |
| GENE BODY                        | Glyma.15G145600 |
| GENE BODY                        | Glyma.15G172600 |
| GENE BODY                        | Glyma.16G005600 |
| PROMOTER                         | Glyma.16G036900 |
| GENE BODY                        | Glyma.16G082900 |
| GENE BODY                        | Glyma.16G083000 |
| PROMOTER (7bp); 5'UTR (193bp)    | Glyma.16G144000 |
| PROMOTER                         | Glyma.16G178100 |
| PROMOTER                         | Glyma.16G178300 |
| PROMOTER                         | Glyma.17G020500 |
| PROMOTER                         | Glyma.17G030800 |
| GENE BODY                        | Glyma.17G068600 |
| 5'UTR                            | Glyma.17G083300 |
| PROMOTER                         | Glyma.17G108200 |
| GENE BODY                        | Glyma.17G142200 |
| GENE BODY (109bp); 3'UTR (91bp)  | Glyma.17G142700 |
| GENE BODY                        | Glyma.17G160600 |
| PROMOTER                         | Glyma.17G170600 |
| GENE BODY                        | Glyma.17G188300 |
| PROMOTER                         | Glyma.18G068900 |
| PROMOTER                         | Glyma.18G112700 |
| PROMOTER (132bp); GENE BODY (68b | Glyma.18G115200 |
| PROMOTER                         | Glyma.19G089900 |
| PROMOTER                         | Glyma.19G110900 |
| PROMOTER                         | Glyma.19G152000 |
| PROMOTER (162bp); GENE BODY (38b | Glyma.19G184000 |
| PROMOTER                         | Glyma.19G242300 |
| PROMOTER                         | Glyma.19G261000 |
| GENE BODY                        | Glyma.20G028300 |
| GENE BODY                        | Glyma.20G049100 |
| PROMOTER (92bp); 5'UTR (108bp)   | Glyma.20G074000 |
| PROMOTER                         | Glyma.U011500   |
| PROMOTER                         | Glyma.U027500   |

---

| <b>GENE ANNOTATION</b>                                          | <b>Methylation Difference</b> |
|-----------------------------------------------------------------|-------------------------------|
| TRICHOME BIREFRINGENCE-LIKE 27                                  | 31.07487923                   |
| N/A                                                             | 48.25620389                   |
| Cysteine proteinases superfamily protein                        | 33.58517719                   |
| elongation factor Ts family protein                             | 30.35914703                   |
| NmrA-like negative transcriptional regulator family protein     | 46.80427607                   |
| receptor like protein 6                                         | 32.37961226                   |
| F-box family protein                                            | 32.37961226                   |
| SPIRAL1-like1                                                   | 30.81589349                   |
| N/A                                                             | 26.309897                     |
| Haloacid dehalogenase-like hydrolase (HAD) superfamily prc      | 30.50847458                   |
| DREB2A-interacting protein 2                                    | 39.90863787                   |
| autoinhibited Ca <sup>2+</sup> -ATPase 11                       | 42.53373119                   |
| N/A                                                             | 27.99797483                   |
| Aldolase-type TIM barrel family protein                         | 38.65327381                   |
| RHO guanyl-nucleotide exchange factor 3                         | 42.54807692                   |
| NAD(P)-binding Rossmann-fold superfamily protein                | 26.31641086                   |
| Disease resistance protein (TIR-NBS-LRR class)                  | 43.88204225                   |
| Basic-leucine zipper (bZIP) transcription factor family proteir | 25.58922559                   |
| Cyclophilin-like peptidyl-prolyl cis-trans isomerase family prc | 36.84017595                   |
| cullin 1                                                        | 33.91812865                   |
| ATP binding microtubule motor family protein                    | 34.42622951                   |
| Transmembrane amino acid transporter family protein             | 42.01877934                   |
| N/A                                                             | 25.55555556                   |
| gamma subunit of Mt ATP synthase                                | 42.35483871                   |
| Protein kinase superfamily protein                              | 29.87457001                   |
| Metal-dependent protein hydrolase                               | 30.49773756                   |
| BED zinc finger ;hAT family dimerisation domain                 | 29.10158099                   |
| MA3 domain-containing protein                                   | 37.11340206                   |
| Pyridoxal-dependent decarboxylase family protein                | 45.10324484                   |
| nuclear RNA polymerase D2A                                      | 35.88383838                   |
| chorismate mutase 2                                             | 31.85823755                   |
| N/A                                                             | 28.92743222                   |
| Zn-dependent exopeptidases superfamily protein                  | 56.04288499                   |
| myb domain protein 29                                           | 29.96389892                   |
| diacylglycerol kinase 4                                         | 45.96553773                   |
| N/A                                                             | 59.88323603                   |
| Ras-related small GTP-binding family protein                    | 26.06214331                   |
| Eukaryotic protein of unknown function (DUF842)                 | 50.45454545                   |
| fatty acid desaturase 5                                         | 30                            |

|                                                             |             |
|-------------------------------------------------------------|-------------|
| CBL-interacting protein kinase 9                            | 50          |
| pentatricopeptide (PPR) repeat-containing protein           | 27.51241226 |
| beta glucosidase 11                                         | 27.53567788 |
| HSP20-like chaperones superfamily protein                   | 41.02564103 |
| HMG (high mobility group) box protein with ARID/BRIGHT D    | 33.56350701 |
| HXXXD-type acyl-transferase family protein                  | 25.37042903 |
| double-stranded RNA binding protein-related / DsRBD prote   | 38.82166791 |
| N/AMETHYLATED_REGION                                        | 29.06131938 |
| Polyketide cyclase/dehydrase and lipid transport superfamil | 29.52353942 |
| Ankyrin-repeat containing protein                           | 35.43379377 |
| FAD/NAD(P)-binding oxidoreductase family protein            | 30.82417582 |
| Core-2/I-branching beta-1,6-N-acetylglucosaminyltransferas  | 34.44055944 |
| Core-2/I-branching beta-1,6-N-acetylglucosaminyltransferas  | 37.430283   |
| N/A                                                         | 29.14027149 |
| N/A                                                         | 25.27472527 |
| N/A                                                         | 25.27472527 |
| extra-large GTP-binding protein 3                           | 29.68944099 |
| thioredoxin 2                                               | 26.05433119 |
| N/A                                                         | 44.7582205  |
| N/A                                                         | 44.7582205  |
| N/A                                                         | 49.0990991  |
| N/A                                                         | 50.95757576 |
| ATP-dependent RNA helicase, mitochondrial (SUV3)            | 28.52049911 |
| N/A                                                         | 47.56097561 |
| NAC domain containing protein 36                            | 50          |
| AP2/B3-like transcriptional factor family protein           | 25.30742459 |
| P-loop containing nucleoside triphosphate hydrolases superl | 31.73884691 |
| binding                                                     | 40.98039216 |
| Nucleotide/sugar transporter family protein                 | 25.77436524 |
| Leucine-rich repeat transmembrane protein kinase            | 44.27058257 |
| Phosphoglycerate mutase-like family protein                 | 26.02397602 |
| glutamate receptor 2.5                                      | 26.51724138 |
| Transducin/WD40 repeat-like superfamily protein             | 37.10462287 |
| Tetratricopeptide repeat (TPR)-like superfamily protein     | 27.808136   |
| UDP-Glycosyltransferase superfamily protein                 | 53.37398374 |
| Homeodomain-like superfamily protein                        | 31.49983148 |
| Transmembrane amino acid transporter family protein         | 42.83876501 |
| Subtilisin-like serine endopeptidase family protein         | 30.08605621 |
| ubiquitin-specific protease 22                              | 27.93471438 |
| plant glycogenin-like starch initiation protein 2           | 25.88614393 |
| N/A                                                         | 53.65853659 |



|                                                               |             |
|---------------------------------------------------------------|-------------|
| bromo-adjacent homology (BAH) domain-containing protein       | 26.08727255 |
| long chain acyl-CoA synthetase 9                              | 25.74065842 |
| Lactoylglutathione lyase / glyoxalase I family protein        | 42.42424242 |
| chitinase A                                                   | 100         |
| IQ-domain 26                                                  | 25.36774316 |
| Phosphatidylinositol-4-phosphate 5-kinase family protein      | 25.42982563 |
| Protein of unknown function (DUF506)                          | 41.70702179 |
| N/A                                                           | 48.33232262 |
| MLP-like protein 423                                          | 30.76825598 |
| MAP kinase kinase 2                                           | 25.34235026 |
| transcription coactivators                                    | 25.19660271 |
| Ribosomal protein L25/Gln-tRNA synthetase, anti-codon-bin     | 29.32118165 |
| Spc97 / Spc98 family of spindle pole body (SBP) component     | 46.9581749  |
| hAT transposon superfamily                                    | 46.9581749  |
| Protein kinase superfamily protein                            | 33.0977918  |
| Heavy metal transport/detoxification superfamily protein      | 25.46975547 |
| Heavy metal transport/detoxification superfamily protein      | 43.20987654 |
| RING/U-box superfamily protein                                | 53.8764266  |
| N/A                                                           | 35.11047895 |
| Alg9-like mannosyltransferase family                          | 42.5210084  |
| Phosphoribulokinase / Uridine kinase family                   | 44.15584416 |
| glucuronidase 3                                               | 68.29268293 |
| MITOCHONDRIAL FERREDOXIN 2                                    | 26.43008475 |
| Protein of unknown function, DUF547                           | 25.83832335 |
| Tetratricopeptide repeat (TPR)-like superfamily protein       | 45.31965561 |
| Plant protein of unknown function (DUF869)                    | 74.55197133 |
| ABC1 family protein                                           | 44.42361762 |
| Neutral/alkaline non-lysosomal ceramidase                     | 64.19828641 |
| Mitochondrial transcription termination factor family protein | 57.33863837 |
| pleckstrin homology (PH) domain-containing protein            | 33.33333333 |
| Nucleotide-diphospho-sugar transferase family protein         | 27.91421653 |
| H/ACA ribonucleoprotein complex, subunit Gar1/Naf1 prote      | 37.57338552 |
| homolog of yeast autophagy 18 (ATG18) G                       | 41.18744699 |
| Ribosomal protein L4/L1 family                                | 41.63925247 |
| O-acetylserine (thiol) lyase (OAS-TL) isoform A1              | 32.98980877 |
| Protein kinase superfamily protein                            | 28.97637795 |
| N/A                                                           | 64.45182724 |
| N/A                                                           | 26.84431609 |
| urease accessory protein D                                    | 48.96551724 |
| TBP-associated factor 7                                       | 34.05839274 |
| myb domain protein 1                                          | 36.25       |

---

| <b>q value</b> | <b>P value</b> |
|----------------|----------------|
| 6.68106E-07    | 3.95286E-10    |
| 5.27234E-05    | 8.72624E-08    |
| 4.85284E-05    | 7.87667E-08    |
| 3.12975E-06    | 2.64803E-09    |
| 4.15523E-28    | 1.47718E-33    |
| 1.39808E-05    | 1.65863E-08    |
| 1.39808E-05    | 1.65863E-08    |
| 4.20563E-12    | 3.84453E-16    |
| 0.005247154    | 4.11999E-05    |
| 1.32233E-10    | 2.10868E-14    |
| 1.69713E-05    | 2.09871E-08    |
| 2.81216E-14    | 1.41389E-18    |
| 6.42586E-05    | 1.11935E-07    |
| 0.002484903    | 1.43562E-05    |
| 1.73353E-08    | 5.27349E-12    |
| 1.6306E-05     | 1.99491E-08    |
| 9.97353E-05    | 1.93721E-07    |
| 7.55432E-06    | 7.88784E-09    |
| 0.001911271    | 9.9095E-06     |
| 0.00010721     | 2.12289E-07    |
| 0.009560258    | 9.83182E-05    |
| 0.00303548     | 1.90357E-05    |
| 0.001339648    | 6.08278E-06    |
| 7.80087E-07    | 4.80555E-10    |
| 2.85207E-07    | 1.42526E-10    |
| 0.001211669    | 5.29462E-06    |
| 3.95209E-06    | 3.52243E-09    |
| 0.000283879    | 7.6006E-07     |
| 0.000326905    | 9.13278E-07    |
| 0.001191793    | 5.17994E-06    |
| 3.98238E-17    | 8.89886E-22    |
| 1.90117E-05    | 2.42055E-08    |
| 3.24729E-11    | 4.2713E-15     |
| 8.16954E-06    | 8.65883E-09    |
| 1.52905E-09    | 3.29251E-13    |
| 0.005497455    | 4.39949E-05    |
| 0.001281217    | 5.70964E-06    |
| 0.002261396    | 1.25228E-05    |
| 0.00443975     | 3.24503E-05    |

|             |             |
|-------------|-------------|
| 8.40893E-10 | 1.69539E-13 |
| 0.000475611 | 1.50939E-06 |
| 0.001825936 | 9.28534E-06 |
| 1.56799E-16 | 3.90193E-21 |
| 0.004998225 | 3.83776E-05 |
| 7.1236E-12  | 7.2355E-16  |
| 0.000812662 | 3.09123E-06 |
| 4.93591E-05 | 8.03155E-08 |
| 0.00193327  | 1.00666E-05 |
| 0.003229123 | 2.07941E-05 |
| 3.0888E-09  | 7.26291E-13 |
| 0.000417278 | 1.2662E-06  |
| 0.002877843 | 1.7588E-05  |
| 0.008839918 | 8.7868E-05  |
| 0.000211198 | 5.12883E-07 |
| 0.000211198 | 5.12883E-07 |
| 0.00815181  | 7.81495E-05 |
| 1.76371E-09 | 3.8605E-13  |
| 0.001749899 | 8.76315E-06 |
| 0.001749899 | 8.76315E-06 |
| 1.88945E-07 | 8.77044E-11 |
| 1.01808E-10 | 1.5594E-14  |
| 5.80763E-06 | 5.62456E-09 |
| 6.0627E-06  | 5.94549E-09 |
| 0.000146403 | 3.17082E-07 |
| 0.002396616 | 1.36376E-05 |
| 5.0455E-07  | 2.82887E-10 |
| 0.002806743 | 1.69439E-05 |
| 0.000222538 | 5.50844E-07 |
| 2.36225E-05 | 3.19594E-08 |
| 0.003850561 | 2.66239E-05 |
| 2.24554E-11 | 2.77119E-15 |
| 7.78441E-12 | 8.18344E-16 |
| 0.001882497 | 9.69324E-06 |
| 1.81726E-22 | 1.38435E-27 |
| 1.33016E-07 | 5.70146E-11 |
| 0.000975518 | 3.95416E-06 |
| 0.002995099 | 1.8659E-05  |
| 4.92288E-05 | 8.00534E-08 |
| 0.000406021 | 1.2193E-06  |
| 3.64162E-05 | 5.48608E-08 |

|             |             |
|-------------|-------------|
| 7.62582E-06 | 7.98185E-09 |
| 4.67186E-06 | 4.30172E-09 |
| 1.2525E-06  | 8.48539E-10 |
| 6.76189E-07 | 4.03022E-10 |
| 0.001967253 | 1.03248E-05 |
| 0.006728148 | 5.90102E-05 |
| 0.00981805  | 0.000102136 |
| 7.34145E-07 | 4.46288E-10 |
| 4.23642E-13 | 2.86147E-17 |
| 4.0229E-07  | 2.14112E-10 |
| 0.005465089 | 4.36387E-05 |
| 0.001285613 | 5.73838E-06 |
| 0.003518567 | 2.34623E-05 |
| 0.003518567 | 2.34623E-05 |
| 9.99893E-05 | 1.94386E-07 |
| 1.56763E-05 | 1.90354E-08 |
| 5.10723E-06 | 4.79322E-09 |
| 0.000828999 | 3.16853E-06 |
| 3.29155E-10 | 5.83399E-14 |
| 5.65713E-08 | 2.0542E-11  |
| 7.75005E-12 | 8.10795E-16 |
| 2.64502E-06 | 2.14254E-09 |
| 0.000294575 | 7.96627E-07 |
| 4.89083E-13 | 3.42768E-17 |
| 6.66504E-07 | 3.93999E-10 |
| 1.15653E-08 | 3.33615E-12 |
| 0.003539697 | 2.36607E-05 |
| 2.34667E-06 | 1.84009E-09 |
| 2.30754E-12 | 1.89847E-16 |
| 0.001212179 | 5.29952E-06 |
| 0.003051174 | 1.9168E-05  |
| 0.006563689 | 5.69406E-05 |
| 3.82949E-08 | 1.30791E-11 |
| 1.81726E-22 | 1.33179E-27 |
| 5.69784E-13 | 4.19582E-17 |
| 0.009900233 | 0.000103454 |
| 0.001191793 | 5.18155E-06 |
| 0.002461972 | 1.41456E-05 |
| 0.000643951 | 2.25522E-06 |
| 2.51011E-10 | 4.29598E-14 |
| 0.006819163 | 6.02096E-05 |

---

**Supplemental Table 5: List of 817 hypo-methylated genes**  
**METHYLATED REGION**

---

mytileDiff25p200.hypo\_CpG.Chr01.517401-517600  
mytileDiff25p200.hypo\_CpG.Chr01.740801-741000  
mytileDiff25p200.hypo\_CpG.Chr01.740201-740400  
mytileDiff25p200.hypo\_CpG.Chr01.2189801-2190000  
mytileDiff25p200.hypo\_CpG.Chr01.2190001-2190200  
mytileDiff25p200.hypo\_CpG.Chr01.2399801-2400000  
mytileDiff25p200.hypo\_CpG.Chr01.2409601-2409800  
mytileDiff25p200.hypo\_CpG.Chr01.4046201-4046400  
mytileDiff25p200.hypo\_CpG.Chr01.4046201-4046400  
mytileDiff25p200.hypo\_CpG.Chr01.4158401-4158600  
mytileDiff25p200.hypo\_CpG.Chr01.4828401-4828600  
mytileDiff25p200.hypo\_CpG.Chr01.7809001-7809200  
mytileDiff25p200.hypo\_CpG.Chr01.9100201-9100400  
mytileDiff25p200.hypo\_CpG.Chr01.10100801-10101000  
mytileDiff25p200.hypo\_CpG.Chr01.15368201-15368400  
mytileDiff25p200.hypo\_CpG.Chr01.15368201-15368400  
mytileDiff25p200.hypo\_CpG.Chr01.26986201-26986400  
mytileDiff25p200.hypo\_CpG.Chr01.26996801-26997000  
mytileDiff25p200.hypo\_CpG.Chr01.26997001-26997200  
mytileDiff25p200.hypo\_CpG.Chr01.28636401-28636600  
mytileDiff25p200.hypo\_CpG.Chr01.29534201-29534400  
mytileDiff25p200.hypo\_CpG.Chr01.39603601-39603800  
mytileDiff25p200.hypo\_CpG.Chr01.39603801-39604000  
mytileDiff25p200.hypo\_CpG.Chr01.40582001-40582200  
mytileDiff25p200.hypo\_CpG.Chr01.41290201-41290400  
mytileDiff25p200.hypo\_CpG.Chr01.45569801-45570000  
mytileDiff25p200.hypo\_CpG.Chr01.45835401-45835600  
mytileDiff25p200.hypo\_CpG.Chr01.46828601-46828800  
mytileDiff25p200.hypo\_CpG.Chr01.47411401-47411600  
mytileDiff25p200.hypo\_CpG.Chr01.48068801-48069000  
mytileDiff25p200.hypo\_CpG.Chr01.48068601-48068800  
mytileDiff25p200.hypo\_CpG.Chr01.48068601-48068800  
mytileDiff25p200.hypo\_CpG.Chr01.48068801-48069000  
mytileDiff25p200.hypo\_CpG.Chr01.48068801-48068800  
mytileDiff25p200.hypo\_CpG.Chr01.48068801-48069000  
mytileDiff25p200.hypo\_CpG.Chr01.49437801-49438000  
mytileDiff25p200.hypo\_CpG.Chr01.50031601-50031800  
mytileDiff25p200.hypo\_CpG.Chr01.50370801-50371000  
mytileDiff25p200.hypo\_CpG.Chr01.50645001-50645200  
mytileDiff25p200.hypo\_CpG.Chr01.51294201-51294400  
mytileDiff25p200.hypo\_CpG.Chr01.53754001-53754200

mytileDiff25p200.hypo\_CpG.Chr01.54094201-54094400  
mytileDiff25p200.hypo\_CpG.Chr01.55465801-55466000  
mytileDiff25p200.hypo\_CpG.Chr01.55519601-55519800  
mytileDiff25p200.hypo\_CpG.Chr01.56047001-56047200  
mytileDiff25p200.hypo\_CpG.Chr01.56119001-56119200  
mytileDiff25p200.hypo\_CpG.Chr01.56264001-56264200  
mytileDiff25p200.hypo\_CpG.Chr01.56617801-56618000  
mytileDiff25p200.hypo\_CpG.Chr01.56758201-56758400  
mytileDiff25p200.hypo\_CpG.Chr02.697601-697800  
mytileDiff25p200.hypo\_CpG.Chr02.1941601-1941800  
mytileDiff25p200.hypo\_CpG.Chr02.3957601-3957800  
mytileDiff25p200.hypo\_CpG.Chr02.4413201-4413400  
mytileDiff25p200.hypo\_CpG.Chr02.5107601-5107800  
mytileDiff25p200.hypo\_CpG.Chr02.5607801-5608000  
mytileDiff25p200.hypo\_CpG.Chr02.5922401-5922600  
mytileDiff25p200.hypo\_CpG.Chr02.5948801-5949000  
mytileDiff25p200.hypo\_CpG.Chr02.7445201-7445400  
mytileDiff25p200.hypo\_CpG.Chr02.7834601-7834800  
mytileDiff25p200.hypo\_CpG.Chr02.8061801-8062000  
mytileDiff25p200.hypo\_CpG.Chr02.8938201-8938400  
mytileDiff25p200.hypo\_CpG.Chr02.9268601-9268800  
mytileDiff25p200.hypo\_CpG.Chr02.9442801-9443000  
mytileDiff25p200.hypo\_CpG.Chr02.9786601-9786800  
mytileDiff25p200.hypo\_CpG.Chr02.9786401-9786600  
mytileDiff25p200.hypo\_CpG.Chr02.10119401-10119600  
mytileDiff25p200.hypo\_CpG.Chr02.13257601-13257800  
mytileDiff25p200.hypo\_CpG.Chr02.14391201-14391400  
mytileDiff25p200.hypo\_CpG.Chr02.14391001-14391200  
mytileDiff25p200.hypo\_CpG.Chr02.14637401-14637600  
mytileDiff25p200.hypo\_CpG.Chr02.14663201-14663400  
mytileDiff25p200.hypo\_CpG.Chr02.15010601-15010800  
mytileDiff25p200.hypo\_CpG.Chr02.18541601-18541800  
mytileDiff25p200.hypo\_CpG.Chr02.19239201-19239400  
mytileDiff25p200.hypo\_CpG.Chr02.21656801-21657000  
mytileDiff25p200.hypo\_CpG.Chr02.25305201-25305400  
mytileDiff25p200.hypo\_CpG.Chr02.25944401-25944600  
mytileDiff25p200.hypo\_CpG.Chr02.26609801-26610000  
mytileDiff25p200.hypo\_CpG.Chr02.27396801-27397000  
mytileDiff25p200.hypo\_CpG.Chr02.32143801-32144000  
mytileDiff25p200.hypo\_CpG.Chr02.33115201-33115400  
mytileDiff25p200.hypo\_CpG.Chr02.33762401-33762600

mytileDiff25p200.hypo\_CpG.Chr02.35583001-35583200  
mytileDiff25p200.hypo\_CpG.Chr02.37473401-37473600  
mytileDiff25p200.hypo\_CpG.Chr02.38562201-38562400  
mytileDiff25p200.hypo\_CpG.Chr02.38614801-38615000  
mytileDiff25p200.hypo\_CpG.Chr02.38739601-38739800  
mytileDiff25p200.hypo\_CpG.Chr02.40235801-40236000  
mytileDiff25p200.hypo\_CpG.Chr02.40544201-40544400  
mytileDiff25p200.hypo\_CpG.Chr02.40750401-40750600  
mytileDiff25p200.hypo\_CpG.Chr02.40920801-40921000  
mytileDiff25p200.hypo\_CpG.Chr02.43892601-43892800  
mytileDiff25p200.hypo\_CpG.Chr02.44398601-44398800  
mytileDiff25p200.hypo\_CpG.Chr02.45341601-45341800  
mytileDiff25p200.hypo\_CpG.Chr02.45414801-45415000  
mytileDiff25p200.hypo\_CpG.Chr02.45437001-45437200  
mytileDiff25p200.hypo\_CpG.Chr02.45773801-45774000  
mytileDiff25p200.hypo\_CpG.Chr02.46408801-46409000  
mytileDiff25p200.hypo\_CpG.Chr02.47328001-47328200  
mytileDiff25p200.hypo\_CpG.Chr02.47393601-47393800  
mytileDiff25p200.hypo\_CpG.Chr02.47581601-47581800  
mytileDiff25p200.hypo\_CpG.Chr02.47997601-47997800  
mytileDiff25p200.hypo\_CpG.Chr02.48528001-48528200  
mytileDiff25p200.hypo\_CpG.Chr03.2411001-2411200  
mytileDiff25p200.hypo\_CpG.Chr03.3030201-3030400  
mytileDiff25p200.hypo\_CpG.Chr03.3639801-3640000  
mytileDiff25p200.hypo\_CpG.Chr03.5575601-5575800  
mytileDiff25p200.hypo\_CpG.Chr03.8308601-8308800  
mytileDiff25p200.hypo\_CpG.Chr03.19002001-19002200  
mytileDiff25p200.hypo\_CpG.Chr03.19015201-19015400  
mytileDiff25p200.hypo\_CpG.Chr03.20393201-20393400  
mytileDiff25p200.hypo\_CpG.Chr03.21086601-21086800  
mytileDiff25p200.hypo\_CpG.Chr03.27380001-27380200  
mytileDiff25p200.hypo\_CpG.Chr03.28937801-28938000  
mytileDiff25p200.hypo\_CpG.Chr03.32605401-32605600  
mytileDiff25p200.hypo\_CpG.Chr03.33305201-33305400  
mytileDiff25p200.hypo\_CpG.Chr03.34174801-34175000  
mytileDiff25p200.hypo\_CpG.Chr03.34692201-34692400  
mytileDiff25p200.hypo\_CpG.Chr03.34778401-34778600  
mytileDiff25p200.hypo\_CpG.Chr03.35489201-35489400  
mytileDiff25p200.hypo\_CpG.Chr03.35908601-35908800  
mytileDiff25p200.hypo\_CpG.Chr03.36156401-36156600  
mytileDiff25p200.hypo\_CpG.Chr03.38755601-38755800  
mytileDiff25p200.hypo\_CpG.Chr03.39211801-39212000

mytileDiff25p200.hypo\_CpG.Chr03.40054601-40054800  
mytileDiff25p200.hypo\_CpG.Chr03.41397601-41397800  
mytileDiff25p200.hypo\_CpG.Chr03.42603201-42603400  
mytileDiff25p200.hypo\_CpG.Chr03.42801001-42801200  
mytileDiff25p200.hypo\_CpG.Chr03.42801201-42801400  
mytileDiff25p200.hypo\_CpG.Chr03.42801001-42801200  
mytileDiff25p200.hypo\_CpG.Chr03.42801201-42801400  
mytileDiff25p200.hypo\_CpG.Chr03.43555401-43555600  
mytileDiff25p200.hypo\_CpG.Chr03.44408801-44409000  
mytileDiff25p200.hypo\_CpG.Chr03.45161801-45162000  
mytileDiff25p200.hypo\_CpG.Chr03.45743001-45743200  
mytileDiff25p200.hypo\_CpG.Chr04.832601-832800  
mytileDiff25p200.hypo\_CpG.Chr04.1239801-1240000  
mytileDiff25p200.hypo\_CpG.Chr04.1293601-1293800  
mytileDiff25p200.hypo\_CpG.Chr04.1995001-1995200  
mytileDiff25p200.hypo\_CpG.Chr04.2047201-2047400  
mytileDiff25p200.hypo\_CpG.Chr04.2310801-2311000  
mytileDiff25p200.hypo\_CpG.Chr04.2788001-2788200  
mytileDiff25p200.hypo\_CpG.Chr04.3193401-3193600  
mytileDiff25p200.hypo\_CpG.Chr04.3192001-3192200  
mytileDiff25p200.hypo\_CpG.Chr04.4361201-4361400  
mytileDiff25p200.hypo\_CpG.Chr04.5355801-5356000  
mytileDiff25p200.hypo\_CpG.Chr04.6295601-6295800  
mytileDiff25p200.hypo\_CpG.Chr04.7579801-7580000  
mytileDiff25p200.hypo\_CpG.Chr04.7963401-7963600  
mytileDiff25p200.hypo\_CpG.Chr04.8114001-8114200  
mytileDiff25p200.hypo\_CpG.Chr04.8601401-8601600  
mytileDiff25p200.hypo\_CpG.Chr04.12930401-12930600  
mytileDiff25p200.hypo\_CpG.Chr04.16385001-16385200  
mytileDiff25p200.hypo\_CpG.Chr04.19112801-19113000  
mytileDiff25p200.hypo\_CpG.Chr04.36767801-36768000  
mytileDiff25p200.hypo\_CpG.Chr04.37093201-37093400  
mytileDiff25p200.hypo\_CpG.Chr04.43949001-43949200  
mytileDiff25p200.hypo\_CpG.Chr04.44078001-44078200  
mytileDiff25p200.hypo\_CpG.Chr04.45908201-45908400  
mytileDiff25p200.hypo\_CpG.Chr04.46134601-46134800  
mytileDiff25p200.hypo\_CpG.Chr04.46541001-46541200  
mytileDiff25p200.hypo\_CpG.Chr04.48224001-48224200  
mytileDiff25p200.hypo\_CpG.Chr04.51292601-51292800  
mytileDiff25p200.hypo\_CpG.Chr04.51936201-51936400  
mytileDiff25p200.hypo\_CpG.Chr05.61801-62000  
mytileDiff25p200.hypo\_CpG.Chr05.431401-431600  
mytileDiff25p200.hypo\_CpG.Chr05.835001-835200



mytileDiff25p200.hypo\_CpG.Chr05.1286201-1286400  
mytileDiff25p200.hypo\_CpG.Chr05.1855601-1855800  
mytileDiff25p200.hypo\_CpG.Chr05.2639801-2640000  
mytileDiff25p200.hypo\_CpG.Chr05.2728601-2728800  
mytileDiff25p200.hypo\_CpG.Chr05.2850601-2850800  
mytileDiff25p200.hypo\_CpG.Chr05.2850001-2850200  
mytileDiff25p200.hypo\_CpG.Chr05.3167401-3167600  
mytileDiff25p200.hypo\_CpG.Chr05.3645401-3645600  
mytileDiff25p200.hypo\_CpG.Chr05.3733401-3733600  
mytileDiff25p200.hypo\_CpG.Chr05.4213001-4213200  
mytileDiff25p200.hypo\_CpG.Chr05.4422201-4422400  
mytileDiff25p200.hypo\_CpG.Chr05.5613801-5614000  
mytileDiff25p200.hypo\_CpG.Chr05.5963201-5963400  
mytileDiff25p200.hypo\_CpG.Chr05.6798201-6798400  
mytileDiff25p200.hypo\_CpG.Chr05.6903001-6903200  
mytileDiff25p200.hypo\_CpG.Chr05.7140801-7141000  
mytileDiff25p200.hypo\_CpG.Chr05.9248401-9248600  
mytileDiff25p200.hypo\_CpG.Chr05.9248401-9248600  
mytileDiff25p200.hypo\_CpG.Chr05.11419601-11419800  
mytileDiff25p200.hypo\_CpG.Chr05.11426001-11426200  
mytileDiff25p200.hypo\_CpG.Chr05.14962001-14962200  
mytileDiff25p200.hypo\_CpG.Chr05.29213201-29213400  
mytileDiff25p200.hypo\_CpG.Chr05.31098001-31098200  
mytileDiff25p200.hypo\_CpG.Chr05.31111801-31112000  
mytileDiff25p200.hypo\_CpG.Chr05.31329201-31329400  
mytileDiff25p200.hypo\_CpG.Chr05.33671801-33672000  
mytileDiff25p200.hypo\_CpG.Chr05.34420801-34421000  
mytileDiff25p200.hypo\_CpG.Chr05.34483601-34483800  
mytileDiff25p200.hypo\_CpG.Chr05.35485201-35485400  
mytileDiff25p200.hypo\_CpG.Chr05.36545401-36545600  
mytileDiff25p200.hypo\_CpG.Chr05.36820201-36820400  
mytileDiff25p200.hypo\_CpG.Chr05.37292001-37292200  
mytileDiff25p200.hypo\_CpG.Chr05.37924801-37925000  
mytileDiff25p200.hypo\_CpG.Chr05.38426801-38427000  
mytileDiff25p200.hypo\_CpG.Chr05.39014801-39015000  
mytileDiff25p200.hypo\_CpG.Chr05.40060401-40060600  
mytileDiff25p200.hypo\_CpG.Chr05.40360201-40360400  
mytileDiff25p200.hypo\_CpG.Chr06.1223601-1223800  
mytileDiff25p200.hypo\_CpG.Chr06.1224401-1224600  
mytileDiff25p200.hypo\_CpG.Chr06.1233801-1234000  
mytileDiff25p200.hypo\_CpG.Chr06.1233801-1234000  
mytileDiff25p200.hypo\_CpG.Chr06.1415401-1415600  
mytileDiff25p200.hypo\_CpG.Chr06.3677801-3678000

mytileDiff25p200.hypo\_CpG.Chr06.6985001-6985200  
mytileDiff25p200.hypo\_CpG.Chr06.6984801-6985000  
mytileDiff25p200.hypo\_CpG.Chr06.7798401-7798600  
mytileDiff25p200.hypo\_CpG.Chr06.7882601-7882800  
mytileDiff25p200.hypo\_CpG.Chr06.8767801-8768000  
mytileDiff25p200.hypo\_CpG.Chr06.9000401-9000600  
mytileDiff25p200.hypo\_CpG.Chr06.9484601-9484800  
mytileDiff25p200.hypo\_CpG.Chr06.9994601-9994800  
mytileDiff25p200.hypo\_CpG.Chr06.10022201-10022400  
mytileDiff25p200.hypo\_CpG.Chr06.10750801-10751000  
mytileDiff25p200.hypo\_CpG.Chr06.11257601-11257800  
mytileDiff25p200.hypo\_CpG.Chr06.11947601-11947800  
mytileDiff25p200.hypo\_CpG.Chr06.12146401-12146600  
mytileDiff25p200.hypo\_CpG.Chr06.13055801-13056000  
mytileDiff25p200.hypo\_CpG.Chr06.13202401-13202600  
mytileDiff25p200.hypo\_CpG.Chr06.13558601-13558800  
mytileDiff25p200.hypo\_CpG.Chr06.14591801-14592000  
mytileDiff25p200.hypo\_CpG.Chr06.14611001-14611200  
mytileDiff25p200.hypo\_CpG.Chr06.14611001-14611200  
mytileDiff25p200.hypo\_CpG.Chr06.17477001-17477200  
mytileDiff25p200.hypo\_CpG.Chr06.17477201-17477400  
mytileDiff25p200.hypo\_CpG.Chr06.18289601-18289800  
mytileDiff25p200.hypo\_CpG.Chr06.18538401-18538600  
mytileDiff25p200.hypo\_CpG.Chr06.20519001-20519200  
mytileDiff25p200.hypo\_CpG.Chr06.20574401-20574600  
mytileDiff25p200.hypo\_CpG.Chr06.21387801-21388000  
mytileDiff25p200.hypo\_CpG.Chr06.21387801-21388000  
mytileDiff25p200.hypo\_CpG.Chr06.21553001-21553200  
mytileDiff25p200.hypo\_CpG.Chr06.22012801-22013000  
mytileDiff25p200.hypo\_CpG.Chr06.23642001-23642200  
mytileDiff25p200.hypo\_CpG.Chr06.26237601-26237800  
mytileDiff25p200.hypo\_CpG.Chr06.29692401-29692600  
mytileDiff25p200.hypo\_CpG.Chr06.34550401-34550600  
mytileDiff25p200.hypo\_CpG.Chr06.35724601-35724800  
mytileDiff25p200.hypo\_CpG.Chr06.38802801-38803000  
mytileDiff25p200.hypo\_CpG.Chr06.39013201-39013400  
mytileDiff25p200.hypo\_CpG.Chr06.39013201-39013400  
mytileDiff25p200.hypo\_CpG.Chr06.39282201-39282400  
mytileDiff25p200.hypo\_CpG.Chr06.40395201-40395400  
mytileDiff25p200.hypo\_CpG.Chr06.41711401-41711600  
mytileDiff25p200.hypo\_CpG.Chr06.43245201-43245400  
mytileDiff25p200.hypo\_CpG.Chr06.43770801-43771000  
mytileDiff25p200.hypo\_CpG.Chr06.43770401-43770600

mytileDiff25p200.hypo\_CpG.Chr06.44469001-44469200  
mytileDiff25p200.hypo\_CpG.Chr06.44523201-44523400  
mytileDiff25p200.hypo\_CpG.Chr06.44523001-44523200  
mytileDiff25p200.hypo\_CpG.Chr06.45395401-45395600  
mytileDiff25p200.hypo\_CpG.Chr06.45730601-45730800  
mytileDiff25p200.hypo\_CpG.Chr06.45756201-45756400  
mytileDiff25p200.hypo\_CpG.Chr06.45756201-45756400  
mytileDiff25p200.hypo\_CpG.Chr06.45830401-45830600  
mytileDiff25p200.hypo\_CpG.Chr06.46654401-46654600  
mytileDiff25p200.hypo\_CpG.Chr06.47836201-47836400  
mytileDiff25p200.hypo\_CpG.Chr06.48646801-48647000  
mytileDiff25p200.hypo\_CpG.Chr06.49685401-49685600  
mytileDiff25p200.hypo\_CpG.Chr06.49985401-49985600  
mytileDiff25p200.hypo\_CpG.Chr06.50686201-50686400  
mytileDiff25p200.hypo\_CpG.Chr07.274001-274200  
mytileDiff25p200.hypo\_CpG.Chr07.381001-381200  
mytileDiff25p200.hypo\_CpG.Chr07.475801-476000  
mytileDiff25p200.hypo\_CpG.Chr07.597401-597600  
mytileDiff25p200.hypo\_CpG.Chr07.671801-672000  
mytileDiff25p200.hypo\_CpG.Chr07.2102201-2102400  
mytileDiff25p200.hypo\_CpG.Chr07.2265201-2265400  
mytileDiff25p200.hypo\_CpG.Chr07.2347801-2348000  
mytileDiff25p200.hypo\_CpG.Chr07.2359401-2359600  
mytileDiff25p200.hypo\_CpG.Chr07.2744001-2744200  
mytileDiff25p200.hypo\_CpG.Chr07.3620601-3620800  
mytileDiff25p200.hypo\_CpG.Chr07.3840601-3840800  
mytileDiff25p200.hypo\_CpG.Chr07.3971201-3971400  
mytileDiff25p200.hypo\_CpG.Chr07.6305401-6305600  
mytileDiff25p200.hypo\_CpG.Chr07.6312201-6312400  
mytileDiff25p200.hypo\_CpG.Chr07.6638601-6638800  
mytileDiff25p200.hypo\_CpG.Chr07.8117001-8117200  
mytileDiff25p200.hypo\_CpG.Chr07.8636001-8636200  
mytileDiff25p200.hypo\_CpG.Chr07.8785801-8786000  
mytileDiff25p200.hypo\_CpG.Chr07.9903601-9903800  
mytileDiff25p200.hypo\_CpG.Chr07.10474201-10474400  
mytileDiff25p200.hypo\_CpG.Chr07.13755801-13756000  
mytileDiff25p200.hypo\_CpG.Chr07.15339801-15340000  
mytileDiff25p200.hypo\_CpG.Chr07.16135401-16135600  
mytileDiff25p200.hypo\_CpG.Chr07.18487801-18488000  
mytileDiff25p200.hypo\_CpG.Chr07.18993001-18993200  
mytileDiff25p200.hypo\_CpG.Chr07.19218801-19219000  
mytileDiff25p200.hypo\_CpG.Chr07.28613201-28613400  
mytileDiff25p200.hypo\_CpG.Chr07.29359601-29359800

mytileDiff25p200.hypo\_CpG.Chr07.29571601-29571800  
mytileDiff25p200.hypo\_CpG.Chr07.33319401-33319600  
mytileDiff25p200.hypo\_CpG.Chr07.35219601-35219800  
mytileDiff25p200.hypo\_CpG.Chr07.36528401-36528600  
mytileDiff25p200.hypo\_CpG.Chr07.37326601-37326800  
mytileDiff25p200.hypo\_CpG.Chr07.37374801-37375000  
mytileDiff25p200.hypo\_CpG.Chr07.37506401-37506600  
mytileDiff25p200.hypo\_CpG.Chr07.39113001-39113200  
mytileDiff25p200.hypo\_CpG.Chr07.40176001-40176200  
mytileDiff25p200.hypo\_CpG.Chr07.40207601-40207800  
mytileDiff25p200.hypo\_CpG.Chr07.41140401-41140600  
mytileDiff25p200.hypo\_CpG.Chr07.41319201-41319400  
mytileDiff25p200.hypo\_CpG.Chr07.41813001-41813200  
mytileDiff25p200.hypo\_CpG.Chr07.43491401-43491600  
mytileDiff25p200.hypo\_CpG.Chr07.43834401-43834600  
mytileDiff25p200.hypo\_CpG.Chr08.376001-376200  
mytileDiff25p200.hypo\_CpG.Chr08.1020001-1020200  
mytileDiff25p200.hypo\_CpG.Chr08.1055801-1056000  
mytileDiff25p200.hypo\_CpG.Chr08.2213001-2213200  
mytileDiff25p200.hypo\_CpG.Chr08.2258401-2258600  
mytileDiff25p200.hypo\_CpG.Chr08.2265401-2265600  
mytileDiff25p200.hypo\_CpG.Chr08.3307401-3307600  
mytileDiff25p200.hypo\_CpG.Chr08.3305001-3305200  
mytileDiff25p200.hypo\_CpG.Chr08.3564601-3564800  
mytileDiff25p200.hypo\_CpG.Chr08.4881801-4882000  
mytileDiff25p200.hypo\_CpG.Chr08.5013401-5013600  
mytileDiff25p200.hypo\_CpG.Chr08.5501601-5501800  
mytileDiff25p200.hypo\_CpG.Chr08.5698201-5698400  
mytileDiff25p200.hypo\_CpG.Chr08.5791001-5791200  
mytileDiff25p200.hypo\_CpG.Chr08.6249001-6249200  
mytileDiff25p200.hypo\_CpG.Chr08.6295001-6295200  
mytileDiff25p200.hypo\_CpG.Chr08.7019601-7019800  
mytileDiff25p200.hypo\_CpG.Chr08.7479601-7479800  
mytileDiff25p200.hypo\_CpG.Chr08.7733801-7734000  
mytileDiff25p200.hypo\_CpG.Chr08.8333201-8333400  
mytileDiff25p200.hypo\_CpG.Chr08.8590801-8591000  
mytileDiff25p200.hypo\_CpG.Chr08.9672401-9672600  
mytileDiff25p200.hypo\_CpG.Chr08.10780401-10780600  
mytileDiff25p200.hypo\_CpG.Chr08.11648201-11648400  
mytileDiff25p200.hypo\_CpG.Chr08.13536001-13536200  
mytileDiff25p200.hypo\_CpG.Chr08.13693801-13694000  
mytileDiff25p200.hypo\_CpG.Chr08.15366801-15367000  
mytileDiff25p200.hypo\_CpG.Chr08.15461401-15461600

mytileDiff25p200.hypo\_CpG.Chr08.16455401-16455600  
mytileDiff25p200.hypo\_CpG.Chr08.16968001-16968200  
mytileDiff25p200.hypo\_CpG.Chr08.18060601-18060800  
mytileDiff25p200.hypo\_CpG.Chr08.18592401-18592600  
mytileDiff25p200.hypo\_CpG.Chr08.19515801-19516000  
mytileDiff25p200.hypo\_CpG.Chr08.19516001-19516200  
mytileDiff25p200.hypo\_CpG.Chr08.19515601-19515800  
mytileDiff25p200.hypo\_CpG.Chr08.19514601-19514800  
mytileDiff25p200.hypo\_CpG.Chr08.19514801-19515000  
mytileDiff25p200.hypo\_CpG.Chr08.20051801-20052000  
mytileDiff25p200.hypo\_CpG.Chr08.20253601-20253800  
mytileDiff25p200.hypo\_CpG.Chr08.20283001-20283200  
mytileDiff25p200.hypo\_CpG.Chr08.20283201-20283400  
mytileDiff25p200.hypo\_CpG.Chr08.20392001-20392200  
mytileDiff25p200.hypo\_CpG.Chr08.20583001-20583200  
mytileDiff25p200.hypo\_CpG.Chr08.20788601-20788800  
mytileDiff25p200.hypo\_CpG.Chr08.21748201-21748400  
mytileDiff25p200.hypo\_CpG.Chr08.23382001-23382200  
mytileDiff25p200.hypo\_CpG.Chr08.23382001-23382200  
mytileDiff25p200.hypo\_CpG.Chr08.36421801-36422000  
mytileDiff25p200.hypo\_CpG.Chr08.36421601-36421800  
mytileDiff25p200.hypo\_CpG.Chr08.36421401-36421600  
mytileDiff25p200.hypo\_CpG.Chr08.36837401-36837600  
mytileDiff25p200.hypo\_CpG.Chr08.36837601-36837800  
mytileDiff25p200.hypo\_CpG.Chr08.37748001-37748200  
mytileDiff25p200.hypo\_CpG.Chr08.38722201-38722400  
mytileDiff25p200.hypo\_CpG.Chr08.38990201-38990400  
mytileDiff25p200.hypo\_CpG.Chr08.41902401-41902600  
mytileDiff25p200.hypo\_CpG.Chr08.44299401-44299600  
mytileDiff25p200.hypo\_CpG.Chr08.47378801-47379000  
mytileDiff25p200.hypo\_CpG.Chr09.224001-224200  
mytileDiff25p200.hypo\_CpG.Chr09.233001-233200  
mytileDiff25p200.hypo\_CpG.Chr09.1004601-1004800  
mytileDiff25p200.hypo\_CpG.Chr09.1157801-1158000  
mytileDiff25p200.hypo\_CpG.Chr09.1310201-1310400  
mytileDiff25p200.hypo\_CpG.Chr09.1324201-1324400  
mytileDiff25p200.hypo\_CpG.Chr09.1919201-1919400  
mytileDiff25p200.hypo\_CpG.Chr09.1959601-1959800  
mytileDiff25p200.hypo\_CpG.Chr09.2020801-2021000  
mytileDiff25p200.hypo\_CpG.Chr09.2057801-2058000  
mytileDiff25p200.hypo\_CpG.Chr09.2229001-2229200  
mytileDiff25p200.hypo\_CpG.Chr09.2443201-2443400  
mytileDiff25p200.hypo\_CpG.Chr09.2509801-2510000

mytileDiff25p200.hypo\_CpG.Chr09.4019801-4020000  
mytileDiff25p200.hypo\_CpG.Chr09.5015201-5015400  
mytileDiff25p200.hypo\_CpG.Chr09.5253601-5253800  
mytileDiff25p200.hypo\_CpG.Chr09.7211601-7211800  
mytileDiff25p200.hypo\_CpG.Chr09.7540601-7540800  
mytileDiff25p200.hypo\_CpG.Chr09.8770401-8770600  
mytileDiff25p200.hypo\_CpG.Chr09.11900801-11901000  
mytileDiff25p200.hypo\_CpG.Chr09.28758201-28758400  
mytileDiff25p200.hypo\_CpG.Chr09.36667401-36667600  
mytileDiff25p200.hypo\_CpG.Chr09.36756401-36756600  
mytileDiff25p200.hypo\_CpG.Chr09.39555001-39555200  
mytileDiff25p200.hypo\_CpG.Chr09.39594401-39594600  
mytileDiff25p200.hypo\_CpG.Chr09.39627401-39627600  
mytileDiff25p200.hypo\_CpG.Chr09.41255401-41255600  
mytileDiff25p200.hypo\_CpG.Chr09.41481601-41481800  
mytileDiff25p200.hypo\_CpG.Chr09.41635201-41635400  
mytileDiff25p200.hypo\_CpG.Chr09.42357001-42357200  
mytileDiff25p200.hypo\_CpG.Chr09.42691801-42692000  
mytileDiff25p200.hypo\_CpG.Chr09.44244001-44244200  
mytileDiff25p200.hypo\_CpG.Chr09.44244001-44244200  
mytileDiff25p200.hypo\_CpG.Chr09.45256401-45256600  
mytileDiff25p200.hypo\_CpG.Chr09.45421601-45421800  
mytileDiff25p200.hypo\_CpG.Chr09.45684001-45684200  
mytileDiff25p200.hypo\_CpG.Chr09.45921801-45922000  
mytileDiff25p200.hypo\_CpG.Chr09.46822001-46822200  
mytileDiff25p200.hypo\_CpG.Chr09.47170801-47171000  
mytileDiff25p200.hypo\_CpG.Chr09.47752601-47752800  
mytileDiff25p200.hypo\_CpG.Chr09.47797601-47797800  
mytileDiff25p200.hypo\_CpG.Chr09.48838401-48838600  
mytileDiff25p200.hypo\_CpG.Chr09.49525401-49525600  
mytileDiff25p200.hypo\_CpG.Chr10.914201-914400  
mytileDiff25p200.hypo\_CpG.Chr10.1791201-1791400  
mytileDiff25p200.hypo\_CpG.Chr10.2006601-2006800  
mytileDiff25p200.hypo\_CpG.Chr10.2178601-2178800  
mytileDiff25p200.hypo\_CpG.Chr10.2436001-2436200  
mytileDiff25p200.hypo\_CpG.Chr10.2624401-2624600  
mytileDiff25p200.hypo\_CpG.Chr10.4942201-4942400  
mytileDiff25p200.hypo\_CpG.Chr10.10257401-10257600  
mytileDiff25p200.hypo\_CpG.Chr10.16184601-16184800  
mytileDiff25p200.hypo\_CpG.Chr10.17202001-17202200  
mytileDiff25p200.hypo\_CpG.Chr10.20674201-20674400  
mytileDiff25p200.hypo\_CpG.Chr10.21512601-21512800  
mytileDiff25p200.hypo\_CpG.Chr10.21511001-21511200

mytileDiff25p200.hypo\_CpG.Chr10.29661801-29662000  
mytileDiff25p200.hypo\_CpG.Chr10.30879801-30880000  
mytileDiff25p200.hypo\_CpG.Chr10.37821201-37821400  
mytileDiff25p200.hypo\_CpG.Chr10.38387201-38387400  
mytileDiff25p200.hypo\_CpG.Chr10.38518401-38518600  
mytileDiff25p200.hypo\_CpG.Chr10.38653401-38653600  
mytileDiff25p200.hypo\_CpG.Chr10.38653401-38653600  
mytileDiff25p200.hypo\_CpG.Chr10.40060401-40060600  
mytileDiff25p200.hypo\_CpG.Chr10.40517601-40517800  
mytileDiff25p200.hypo\_CpG.Chr10.42083401-42083600  
mytileDiff25p200.hypo\_CpG.Chr10.42233001-42233200  
mytileDiff25p200.hypo\_CpG.Chr10.42420201-42420400  
mytileDiff25p200.hypo\_CpG.Chr10.42747601-42747800  
mytileDiff25p200.hypo\_CpG.Chr10.43272601-43272800  
mytileDiff25p200.hypo\_CpG.Chr10.43988201-43988400  
mytileDiff25p200.hypo\_CpG.Chr10.44143601-44143800  
mytileDiff25p200.hypo\_CpG.Chr10.44158201-44158400  
mytileDiff25p200.hypo\_CpG.Chr10.46253401-46253600  
mytileDiff25p200.hypo\_CpG.Chr10.47041801-47042000  
mytileDiff25p200.hypo\_CpG.Chr10.50373401-50373600  
mytileDiff25p200.hypo\_CpG.Chr10.51162001-51162200  
mytileDiff25p200.hypo\_CpG.Chr11.168401-168600  
mytileDiff25p200.hypo\_CpG.Chr11.608601-608800  
mytileDiff25p200.hypo\_CpG.Chr11.2875601-2875800  
mytileDiff25p200.hypo\_CpG.Chr11.2927401-2927600  
mytileDiff25p200.hypo\_CpG.Chr11.4308001-4308200  
mytileDiff25p200.hypo\_CpG.Chr11.4953001-4953200  
mytileDiff25p200.hypo\_CpG.Chr11.6176401-6176600  
mytileDiff25p200.hypo\_CpG.Chr11.7806001-7806200  
mytileDiff25p200.hypo\_CpG.Chr11.7806001-7806200  
mytileDiff25p200.hypo\_CpG.Chr11.8277201-8277400  
mytileDiff25p200.hypo\_CpG.Chr11.8370401-8370600  
mytileDiff25p200.hypo\_CpG.Chr11.8398201-8398400  
mytileDiff25p200.hypo\_CpG.Chr11.12149201-12149400  
mytileDiff25p200.hypo\_CpG.Chr11.25984001-25984200  
mytileDiff25p200.hypo\_CpG.Chr11.26057601-26057800  
mytileDiff25p200.hypo\_CpG.Chr11.26383601-26383800  
mytileDiff25p200.hypo\_CpG.Chr11.26566001-26566200  
mytileDiff25p200.hypo\_CpG.Chr11.26844001-26844200  
mytileDiff25p200.hypo\_CpG.Chr11.31805201-31805400  
mytileDiff25p200.hypo\_CpG.Chr11.32391601-32391800  
mytileDiff25p200.hypo\_CpG.Chr11.32391601-32391800  
mytileDiff25p200.hypo\_CpG.Chr11.34306201-34306400

mytileDiff25p200.hypo\_CpG.Chr12.327201-327400  
mytileDiff25p200.hypo\_CpG.Chr12.329001-329200  
mytileDiff25p200.hypo\_CpG.Chr12.2010001-2010200  
mytileDiff25p200.hypo\_CpG.Chr12.2648001-2648200  
mytileDiff25p200.hypo\_CpG.Chr12.3665801-3666000  
mytileDiff25p200.hypo\_CpG.Chr12.3665001-3665200  
mytileDiff25p200.hypo\_CpG.Chr12.4876401-4876600  
mytileDiff25p200.hypo\_CpG.Chr12.4876401-4876600  
mytileDiff25p200.hypo\_CpG.Chr12.4982401-4982600  
mytileDiff25p200.hypo\_CpG.Chr12.5637601-5637800  
mytileDiff25p200.hypo\_CpG.Chr12.6504201-6504400  
mytileDiff25p200.hypo\_CpG.Chr12.6739001-6739200  
mytileDiff25p200.hypo\_CpG.Chr12.15257601-15257800  
mytileDiff25p200.hypo\_CpG.Chr12.16067601-16067800  
mytileDiff25p200.hypo\_CpG.Chr12.16319601-16319800  
mytileDiff25p200.hypo\_CpG.Chr12.17522201-17522400  
mytileDiff25p200.hypo\_CpG.Chr12.24782201-24782400  
mytileDiff25p200.hypo\_CpG.Chr12.26779401-26779600  
mytileDiff25p200.hypo\_CpG.Chr12.32050601-32050800  
mytileDiff25p200.hypo\_CpG.Chr12.34057601-34057800  
mytileDiff25p200.hypo\_CpG.Chr12.34140401-34140600  
mytileDiff25p200.hypo\_CpG.Chr12.35945201-35945400  
mytileDiff25p200.hypo\_CpG.Chr12.36188601-36188800  
mytileDiff25p200.hypo\_CpG.Chr12.36408401-36408600  
mytileDiff25p200.hypo\_CpG.Chr12.36591201-36591400  
mytileDiff25p200.hypo\_CpG.Chr12.36852201-36852400  
mytileDiff25p200.hypo\_CpG.Chr12.37362201-37362400  
mytileDiff25p200.hypo\_CpG.Chr12.37891201-37891400  
mytileDiff25p200.hypo\_CpG.Chr12.38674201-38674400  
mytileDiff25p200.hypo\_CpG.Chr12.38995401-38995600  
mytileDiff25p200.hypo\_CpG.Chr12.39043801-39044000  
mytileDiff25p200.hypo\_CpG.Chr12.39994601-39994800  
mytileDiff25p200.hypo\_CpG.Chr13.1852001-1852200  
mytileDiff25p200.hypo\_CpG.Chr13.5479801-5480000  
mytileDiff25p200.hypo\_CpG.Chr13.9599001-9599200  
mytileDiff25p200.hypo\_CpG.Chr13.9599201-9599400  
mytileDiff25p200.hypo\_CpG.Chr13.9599001-9599200  
mytileDiff25p200.hypo\_CpG.Chr13.9599201-9599400  
mytileDiff25p200.hypo\_CpG.Chr13.11207601-11207800  
mytileDiff25p200.hypo\_CpG.Chr13.11480601-11480800  
mytileDiff25p200.hypo\_CpG.Chr13.11846401-11846600  
mytileDiff25p200.hypo\_CpG.Chr13.14437001-14437200  
mytileDiff25p200.hypo\_CpG.Chr13.14438401-14438600



mytileDiff25p200.hypo\_CpG.Chr13.14436201-14436400  
mytileDiff25p200.hypo\_CpG.Chr13.15099401-15099600  
mytileDiff25p200.hypo\_CpG.Chr13.15604801-15605000  
mytileDiff25p200.hypo\_CpG.Chr13.15618801-15619000  
mytileDiff25p200.hypo\_CpG.Chr13.15956801-15957000  
mytileDiff25p200.hypo\_CpG.Chr13.16216801-16217000  
mytileDiff25p200.hypo\_CpG.Chr13.16753001-16753200  
mytileDiff25p200.hypo\_CpG.Chr13.17658001-17658200  
mytileDiff25p200.hypo\_CpG.Chr13.18402201-18402400  
mytileDiff25p200.hypo\_CpG.Chr13.18504601-18504800  
mytileDiff25p200.hypo\_CpG.Chr13.19520001-19520200  
mytileDiff25p200.hypo\_CpG.Chr13.23188601-23188800  
mytileDiff25p200.hypo\_CpG.Chr13.24045801-24046000  
mytileDiff25p200.hypo\_CpG.Chr13.24167201-24167400  
mytileDiff25p200.hypo\_CpG.Chr13.24281801-24282000  
mytileDiff25p200.hypo\_CpG.Chr13.24358001-24358200  
mytileDiff25p200.hypo\_CpG.Chr13.24374801-24375000  
mytileDiff25p200.hypo\_CpG.Chr13.24374801-24375000  
mytileDiff25p200.hypo\_CpG.Chr13.24821801-24822000  
mytileDiff25p200.hypo\_CpG.Chr13.27570801-27571000  
mytileDiff25p200.hypo\_CpG.Chr13.28866801-28867000  
mytileDiff25p200.hypo\_CpG.Chr13.30253401-30253600  
mytileDiff25p200.hypo\_CpG.Chr13.30416401-30416600  
mytileDiff25p200.hypo\_CpG.Chr13.30837201-30837400  
mytileDiff25p200.hypo\_CpG.Chr13.31045401-31045600  
mytileDiff25p200.hypo\_CpG.Chr13.31058401-31058600  
mytileDiff25p200.hypo\_CpG.Chr13.31244801-31245000  
mytileDiff25p200.hypo\_CpG.Chr13.32326401-32326600  
mytileDiff25p200.hypo\_CpG.Chr13.33461201-33461400  
mytileDiff25p200.hypo\_CpG.Chr13.33644001-33644200  
mytileDiff25p200.hypo\_CpG.Chr13.33803401-33803600  
mytileDiff25p200.hypo\_CpG.Chr13.34420801-34421000  
mytileDiff25p200.hypo\_CpG.Chr13.34600401-34600600  
mytileDiff25p200.hypo\_CpG.Chr13.34971801-34972000  
mytileDiff25p200.hypo\_CpG.Chr13.35351801-35352000  
mytileDiff25p200.hypo\_CpG.Chr13.35975401-35975600  
mytileDiff25p200.hypo\_CpG.Chr13.36344401-36344600  
mytileDiff25p200.hypo\_CpG.Chr13.37692801-37693000  
mytileDiff25p200.hypo\_CpG.Chr13.37896601-37896800  
mytileDiff25p200.hypo\_CpG.Chr13.37995801-37996000  
mytileDiff25p200.hypo\_CpG.Chr13.38337401-38337600  
mytileDiff25p200.hypo\_CpG.Chr13.38494801-38495000  
mytileDiff25p200.hypo\_CpG.Chr13.38964801-38965000

mytileDiff25p200.hypo\_CpG.Chr13.39548801-39549000  
mytileDiff25p200.hypo\_CpG.Chr13.39983001-39983200  
mytileDiff25p200.hypo\_CpG.Chr13.40225401-40225600  
mytileDiff25p200.hypo\_CpG.Chr13.41636401-41636600  
mytileDiff25p200.hypo\_CpG.Chr13.42140001-42140200  
mytileDiff25p200.hypo\_CpG.Chr13.43397201-43397400  
mytileDiff25p200.hypo\_CpG.Chr13.44429801-44430000  
mytileDiff25p200.hypo\_CpG.Chr13.45650001-45650200  
mytileDiff25p200.hypo\_CpG.Chr14.1313401-1313600  
mytileDiff25p200.hypo\_CpG.Chr14.1821401-1821600  
mytileDiff25p200.hypo\_CpG.Chr14.3356601-3356800  
mytileDiff25p200.hypo\_CpG.Chr14.3417601-3417800  
mytileDiff25p200.hypo\_CpG.Chr14.5422401-5422600  
mytileDiff25p200.hypo\_CpG.Chr14.5431601-5431800  
mytileDiff25p200.hypo\_CpG.Chr14.5492201-5492400  
mytileDiff25p200.hypo\_CpG.Chr14.7258801-7259000  
mytileDiff25p200.hypo\_CpG.Chr14.7405001-7405200  
mytileDiff25p200.hypo\_CpG.Chr14.8543001-8543200  
mytileDiff25p200.hypo\_CpG.Chr14.8840401-8840600  
mytileDiff25p200.hypo\_CpG.Chr14.8852001-8852200  
mytileDiff25p200.hypo\_CpG.Chr14.9254201-9254400  
mytileDiff25p200.hypo\_CpG.Chr14.9261801-9262000  
mytileDiff25p200.hypo\_CpG.Chr14.9633401-9633600  
mytileDiff25p200.hypo\_CpG.Chr14.11114601-11114800  
mytileDiff25p200.hypo\_CpG.Chr14.11965001-11965200  
mytileDiff25p200.hypo\_CpG.Chr14.12945201-12945400  
mytileDiff25p200.hypo\_CpG.Chr14.13187001-13187200  
mytileDiff25p200.hypo\_CpG.Chr14.13187001-13187200  
mytileDiff25p200.hypo\_CpG.Chr14.17460201-17460400  
mytileDiff25p200.hypo\_CpG.Chr14.21708201-21708400  
mytileDiff25p200.hypo\_CpG.Chr14.22731601-22731800  
mytileDiff25p200.hypo\_CpG.Chr14.22728001-22728200  
mytileDiff25p200.hypo\_CpG.Chr14.24573401-24573600  
mytileDiff25p200.hypo\_CpG.Chr14.28566401-28566600  
mytileDiff25p200.hypo\_CpG.Chr14.35614201-35614400  
mytileDiff25p200.hypo\_CpG.Chr14.35614001-35614200  
mytileDiff25p200.hypo\_CpG.Chr14.35614401-35614600  
mytileDiff25p200.hypo\_CpG.Chr14.37186801-37187000  
mytileDiff25p200.hypo\_CpG.Chr14.39033601-39033800  
mytileDiff25p200.hypo\_CpG.Chr14.42143001-42143200  
mytileDiff25p200.hypo\_CpG.Chr14.42142801-42143000  
mytileDiff25p200.hypo\_CpG.Chr14.44038801-44039000  
mytileDiff25p200.hypo\_CpG.Chr14.44062601-44062800

mytileDiff25p200.hypo\_CpG.Chr14.44705601-44705800  
mytileDiff25p200.hypo\_CpG.Chr14.45153401-45153600  
mytileDiff25p200.hypo\_CpG.Chr14.45516401-45516600  
mytileDiff25p200.hypo\_CpG.Chr14.45537401-45537600  
mytileDiff25p200.hypo\_CpG.Chr14.45572601-45572800  
mytileDiff25p200.hypo\_CpG.Chr14.46557401-46557600  
mytileDiff25p200.hypo\_CpG.Chr14.46888801-46889000  
mytileDiff25p200.hypo\_CpG.Chr14.48743401-48743600  
mytileDiff25p200.hypo\_CpG.Chr15.1198601-1198800  
mytileDiff25p200.hypo\_CpG.Chr15.1332201-1332400  
mytileDiff25p200.hypo\_CpG.Chr15.1908201-1908400  
mytileDiff25p200.hypo\_CpG.Chr15.2098401-2098600  
mytileDiff25p200.hypo\_CpG.Chr15.3166401-3166600  
mytileDiff25p200.hypo\_CpG.Chr15.4391001-4391200  
mytileDiff25p200.hypo\_CpG.Chr15.4391001-4391200  
mytileDiff25p200.hypo\_CpG.Chr15.4534601-4534800  
mytileDiff25p200.hypo\_CpG.Chr15.5663001-5663200  
mytileDiff25p200.hypo\_CpG.Chr15.6742201-6742400  
mytileDiff25p200.hypo\_CpG.Chr15.7537201-7537400  
mytileDiff25p200.hypo\_CpG.Chr15.7629801-7630000  
mytileDiff25p200.hypo\_CpG.Chr15.8439801-8440000  
mytileDiff25p200.hypo\_CpG.Chr15.9131601-9131800  
mytileDiff25p200.hypo\_CpG.Chr15.9964401-9964600  
mytileDiff25p200.hypo\_CpG.Chr15.9986001-9986200  
mytileDiff25p200.hypo\_CpG.Chr15.9986201-9986400  
mytileDiff25p200.hypo\_CpG.Chr15.12857401-12857600  
mytileDiff25p200.hypo\_CpG.Chr15.15899001-15899200  
mytileDiff25p200.hypo\_CpG.Chr15.16556801-16557000  
mytileDiff25p200.hypo\_CpG.Chr15.16556801-16557000  
mytileDiff25p200.hypo\_CpG.Chr15.17553401-17553600  
mytileDiff25p200.hypo\_CpG.Chr15.17768601-17768800  
mytileDiff25p200.hypo\_CpG.Chr15.17768201-17768400  
mytileDiff25p200.hypo\_CpG.Chr15.17768001-17768200  
mytileDiff25p200.hypo\_CpG.Chr15.21489201-21489400  
mytileDiff25p200.hypo\_CpG.Chr15.22867201-22867400  
mytileDiff25p200.hypo\_CpG.Chr15.22867401-22867600  
mytileDiff25p200.hypo\_CpG.Chr15.22867601-22867800  
mytileDiff25p200.hypo\_CpG.Chr15.23418001-23418200  
mytileDiff25p200.hypo\_CpG.Chr15.27208601-27208800  
mytileDiff25p200.hypo\_CpG.Chr15.31267401-31267600  
mytileDiff25p200.hypo\_CpG.Chr15.33439201-33439400  
mytileDiff25p200.hypo\_CpG.Chr15.33461001-33461200  
mytileDiff25p200.hypo\_CpG.Chr15.35276401-35276600

mytileDiff25p200.hypo\_CpG.Chr15.43721001-43721200  
mytileDiff25p200.hypo\_CpG.Chr15.44358801-44359000  
mytileDiff25p200.hypo\_CpG.Chr15.45520201-45520400  
mytileDiff25p200.hypo\_CpG.Chr15.45520401-45520600  
mytileDiff25p200.hypo\_CpG.Chr15.46684801-46685000  
mytileDiff25p200.hypo\_CpG.Chr15.46684601-46684800  
mytileDiff25p200.hypo\_CpG.Chr15.46684401-46684600  
mytileDiff25p200.hypo\_CpG.Chr15.47407201-47407400  
mytileDiff25p200.hypo\_CpG.Chr15.48310601-48310800  
mytileDiff25p200.hypo\_CpG.Chr15.48522601-48522800  
mytileDiff25p200.hypo\_CpG.Chr15.50908001-50908200  
mytileDiff25p200.hypo\_CpG.Chr15.51108001-51108200  
mytileDiff25p200.hypo\_CpG.Chr15.51160401-51160600  
mytileDiff25p200.hypo\_CpG.Chr16.323601-323800  
mytileDiff25p200.hypo\_CpG.Chr16.574201-574400  
mytileDiff25p200.hypo\_CpG.Chr16.850001-850200  
mytileDiff25p200.hypo\_CpG.Chr16.1254001-1254200  
mytileDiff25p200.hypo\_CpG.Chr16.1621001-1621200  
mytileDiff25p200.hypo\_CpG.Chr16.2459801-2460000  
mytileDiff25p200.hypo\_CpG.Chr16.3743801-3744000  
mytileDiff25p200.hypo\_CpG.Chr16.3743601-3743800  
mytileDiff25p200.hypo\_CpG.Chr16.3841401-3841600  
mytileDiff25p200.hypo\_CpG.Chr16.4766201-4766400  
mytileDiff25p200.hypo\_CpG.Chr16.5087401-5087600  
mytileDiff25p200.hypo\_CpG.Chr16.5630001-5630200  
mytileDiff25p200.hypo\_CpG.Chr16.6638801-6639000  
mytileDiff25p200.hypo\_CpG.Chr16.6916601-6916800  
mytileDiff25p200.hypo\_CpG.Chr16.7179401-7179600  
mytileDiff25p200.hypo\_CpG.Chr16.7949401-7949600  
mytileDiff25p200.hypo\_CpG.Chr16.10645401-10645600  
mytileDiff25p200.hypo\_CpG.Chr16.16980401-16980600  
mytileDiff25p200.hypo\_CpG.Chr16.20492201-20492400  
mytileDiff25p200.hypo\_CpG.Chr16.25033001-25033200  
mytileDiff25p200.hypo\_CpG.Chr16.28033601-28033800  
mytileDiff25p200.hypo\_CpG.Chr16.28060601-28060800  
mytileDiff25p200.hypo\_CpG.Chr16.29157601-29157800  
mytileDiff25p200.hypo\_CpG.Chr16.29250001-29250200  
mytileDiff25p200.hypo\_CpG.Chr16.29536201-29536400  
mytileDiff25p200.hypo\_CpG.Chr16.29534801-29535000  
mytileDiff25p200.hypo\_CpG.Chr16.30021401-30021600  
mytileDiff25p200.hypo\_CpG.Chr16.30473001-30473200  
mytileDiff25p200.hypo\_CpG.Chr16.30775801-30776000  
mytileDiff25p200.hypo\_CpG.Chr16.31442401-31442600

mytileDiff25p200.hypo\_CpG.Chr16.31597801-31598000  
mytileDiff25p200.hypo\_CpG.Chr16.31933601-31933800  
mytileDiff25p200.hypo\_CpG.Chr16.34764001-34764200  
mytileDiff25p200.hypo\_CpG.Chr16.35222401-35222600  
mytileDiff25p200.hypo\_CpG.Chr16.35259601-35259800  
mytileDiff25p200.hypo\_CpG.Chr17.881801-882000  
mytileDiff25p200.hypo\_CpG.Chr17.1753401-1753600  
mytileDiff25p200.hypo\_CpG.Chr17.1824801-1825000  
mytileDiff25p200.hypo\_CpG.Chr17.2058001-2058200  
mytileDiff25p200.hypo\_CpG.Chr17.2459001-2459200  
mytileDiff25p200.hypo\_CpG.Chr17.2790801-2791000  
mytileDiff25p200.hypo\_CpG.Chr17.2927201-2927400  
mytileDiff25p200.hypo\_CpG.Chr17.3284001-3284200  
mytileDiff25p200.hypo\_CpG.Chr17.4536201-4536400  
mytileDiff25p200.hypo\_CpG.Chr17.4576201-4576400  
mytileDiff25p200.hypo\_CpG.Chr17.4756801-4757000  
mytileDiff25p200.hypo\_CpG.Chr17.6464601-6464800  
mytileDiff25p200.hypo\_CpG.Chr17.6491201-6491400  
mytileDiff25p200.hypo\_CpG.Chr17.6908601-6908800  
mytileDiff25p200.hypo\_CpG.Chr17.7376801-7377000  
mytileDiff25p200.hypo\_CpG.Chr17.7917801-7918000  
mytileDiff25p200.hypo\_CpG.Chr17.8289401-8289600  
mytileDiff25p200.hypo\_CpG.Chr17.10007001-10007200  
mytileDiff25p200.hypo\_CpG.Chr17.10351401-10351600  
mytileDiff25p200.hypo\_CpG.Chr17.10407401-10407600  
mytileDiff25p200.hypo\_CpG.Chr17.11865801-11866000  
mytileDiff25p200.hypo\_CpG.Chr17.11951801-11952000  
mytileDiff25p200.hypo\_CpG.Chr17.13586001-13586200  
mytileDiff25p200.hypo\_CpG.Chr17.13969601-13969800  
mytileDiff25p200.hypo\_CpG.Chr17.16432801-16433000  
mytileDiff25p200.hypo\_CpG.Chr17.17898001-17898200  
mytileDiff25p200.hypo\_CpG.Chr17.17898201-17898400  
mytileDiff25p200.hypo\_CpG.Chr17.20925601-20925800  
mytileDiff25p200.hypo\_CpG.Chr17.23454801-23455000  
mytileDiff25p200.hypo\_CpG.Chr17.23454401-23454600  
mytileDiff25p200.hypo\_CpG.Chr17.23453001-23453200  
mytileDiff25p200.hypo\_CpG.Chr17.23452801-23453000  
mytileDiff25p200.hypo\_CpG.Chr17.24794801-24795000  
mytileDiff25p200.hypo\_CpG.Chr17.26564001-26564200  
mytileDiff25p200.hypo\_CpG.Chr17.27084601-27084800  
mytileDiff25p200.hypo\_CpG.Chr17.27299601-27299800  
mytileDiff25p200.hypo\_CpG.Chr17.27305801-27306000  
mytileDiff25p200.hypo\_CpG.Chr17.31733201-31733400

mytileDiff25p200.hypo\_CpG.Chr17.31841801-31842000  
mytileDiff25p200.hypo\_CpG.Chr17.31947201-31947400  
mytileDiff25p200.hypo\_CpG.Chr17.32892401-32892600  
mytileDiff25p200.hypo\_CpG.Chr17.34666601-34666800  
mytileDiff25p200.hypo\_CpG.Chr17.34666401-34666600  
mytileDiff25p200.hypo\_CpG.Chr17.35747001-35747200  
mytileDiff25p200.hypo\_CpG.Chr17.36335401-36335600  
mytileDiff25p200.hypo\_CpG.Chr17.37130001-37130200  
mytileDiff25p200.hypo\_CpG.Chr17.37300201-37300400  
mytileDiff25p200.hypo\_CpG.Chr17.38106001-38106200  
mytileDiff25p200.hypo\_CpG.Chr17.39053601-39053800  
mytileDiff25p200.hypo\_CpG.Chr17.40029201-40029400  
mytileDiff25p200.hypo\_CpG.Chr17.40427001-40427200  
mytileDiff25p200.hypo\_CpG.Chr17.40514201-40514400  
mytileDiff25p200.hypo\_CpG.Chr17.40763801-40764000  
mytileDiff25p200.hypo\_CpG.Chr17.40948201-40948400  
mytileDiff25p200.hypo\_CpG.Chr17.41122201-41122400  
mytileDiff25p200.hypo\_CpG.Chr18.312401-312600  
mytileDiff25p200.hypo\_CpG.Chr18.367601-367800  
mytileDiff25p200.hypo\_CpG.Chr18.368201-368400  
mytileDiff25p200.hypo\_CpG.Chr18.795801-796000  
mytileDiff25p200.hypo\_CpG.Chr18.793801-794000  
mytileDiff25p200.hypo\_CpG.Chr18.940201-940400  
mytileDiff25p200.hypo\_CpG.Chr18.940001-940200  
mytileDiff25p200.hypo\_CpG.Chr18.1157001-1157200  
mytileDiff25p200.hypo\_CpG.Chr18.2076801-2077000  
mytileDiff25p200.hypo\_CpG.Chr18.2183401-2183600  
mytileDiff25p200.hypo\_CpG.Chr18.4854601-4854800  
mytileDiff25p200.hypo\_CpG.Chr18.5485201-5485400  
mytileDiff25p200.hypo\_CpG.Chr18.5903001-5903200  
mytileDiff25p200.hypo\_CpG.Chr18.6420201-6420400  
mytileDiff25p200.hypo\_CpG.Chr18.9494201-9494400  
mytileDiff25p200.hypo\_CpG.Chr18.9493601-9493800  
mytileDiff25p200.hypo\_CpG.Chr18.9501001-9501200  
mytileDiff25p200.hypo\_CpG.Chr18.12258401-12258600  
mytileDiff25p200.hypo\_CpG.Chr18.13325601-13325800  
mytileDiff25p200.hypo\_CpG.Chr18.18325601-18325800  
mytileDiff25p200.hypo\_CpG.Chr18.24848001-24848200  
mytileDiff25p200.hypo\_CpG.Chr18.31581001-31581200  
mytileDiff25p200.hypo\_CpG.Chr18.36070001-36070200  
mytileDiff25p200.hypo\_CpG.Chr18.38962601-38962800  
mytileDiff25p200.hypo\_CpG.Chr18.39266201-39266400  
mytileDiff25p200.hypo\_CpG.Chr18.40099001-40099200

mytileDiff25p200.hypo\_CpG.Chr18.42093401-42093600  
mytileDiff25p200.hypo\_CpG.Chr18.42791801-42792000  
mytileDiff25p200.hypo\_CpG.Chr18.44965801-44966000  
mytileDiff25p200.hypo\_CpG.Chr18.46858801-46859000  
mytileDiff25p200.hypo\_CpG.Chr18.47905601-47905800  
mytileDiff25p200.hypo\_CpG.Chr18.49528001-49528200  
mytileDiff25p200.hypo\_CpG.Chr18.50592401-50592600  
mytileDiff25p200.hypo\_CpG.Chr18.51908601-51908800  
mytileDiff25p200.hypo\_CpG.Chr18.52582001-52582200  
mytileDiff25p200.hypo\_CpG.Chr18.52600001-52600200  
mytileDiff25p200.hypo\_CpG.Chr18.53469201-53469400  
mytileDiff25p200.hypo\_CpG.Chr18.53835401-53835600  
mytileDiff25p200.hypo\_CpG.Chr18.53937201-53937400  
mytileDiff25p200.hypo\_CpG.Chr18.53971401-53971600  
mytileDiff25p200.hypo\_CpG.Chr18.56129601-56129800  
mytileDiff25p200.hypo\_CpG.Chr18.56659001-56659200  
mytileDiff25p200.hypo\_CpG.Chr18.57315801-57316000  
mytileDiff25p200.hypo\_CpG.Chr18.57517601-57517800  
mytileDiff25p200.hypo\_CpG.Chr19.104001-104200  
mytileDiff25p200.hypo\_CpG.Chr19.1166801-1167000  
mytileDiff25p200.hypo\_CpG.Chr19.1229201-1229400  
mytileDiff25p200.hypo\_CpG.Chr19.1620201-1620400  
mytileDiff25p200.hypo\_CpG.Chr19.2688601-2688800  
mytileDiff25p200.hypo\_CpG.Chr19.3580601-3580800  
mytileDiff25p200.hypo\_CpG.Chr19.3595601-3595800  
mytileDiff25p200.hypo\_CpG.Chr19.5792201-5792400  
mytileDiff25p200.hypo\_CpG.Chr19.5881401-5881600  
mytileDiff25p200.hypo\_CpG.Chr19.6402801-6403000  
mytileDiff25p200.hypo\_CpG.Chr19.27529801-27530000  
mytileDiff25p200.hypo\_CpG.Chr19.27731801-27732000  
mytileDiff25p200.hypo\_CpG.Chr19.27763601-27763800  
mytileDiff25p200.hypo\_CpG.Chr19.30020801-30021000  
mytileDiff25p200.hypo\_CpG.Chr19.30800001-30800200  
mytileDiff25p200.hypo\_CpG.Chr19.33585801-33586000  
mytileDiff25p200.hypo\_CpG.Chr19.34185201-34185400  
mytileDiff25p200.hypo\_CpG.Chr19.37135801-37136000  
mytileDiff25p200.hypo\_CpG.Chr19.37398401-37398600  
mytileDiff25p200.hypo\_CpG.Chr19.40298201-40298400  
mytileDiff25p200.hypo\_CpG.Chr19.40978001-40978200  
mytileDiff25p200.hypo\_CpG.Chr19.41269001-41269200  
mytileDiff25p200.hypo\_CpG.Chr19.41655001-41655200  
mytileDiff25p200.hypo\_CpG.Chr19.43148201-43148400  
mytileDiff25p200.hypo\_CpG.Chr19.43567801-43568000

mytileDiff25p200.hypo\_CpG.Chr19.43591201-43591400  
mytileDiff25p200.hypo\_CpG.Chr19.43794201-43794400  
mytileDiff25p200.hypo\_CpG.Chr19.43837601-43837800  
mytileDiff25p200.hypo\_CpG.Chr19.43938601-43938800  
mytileDiff25p200.hypo\_CpG.Chr19.44265801-44266000  
mytileDiff25p200.hypo\_CpG.Chr19.44394401-44394600  
mytileDiff25p200.hypo\_CpG.Chr19.44580801-44581000  
mytileDiff25p200.hypo\_CpG.Chr19.44580801-44581000  
mytileDiff25p200.hypo\_CpG.Chr19.46324201-46324400  
mytileDiff25p200.hypo\_CpG.Chr19.46715801-46716000  
mytileDiff25p200.hypo\_CpG.Chr19.46981801-46982000  
mytileDiff25p200.hypo\_CpG.Chr19.47309401-47309600  
mytileDiff25p200.hypo\_CpG.Chr19.48772001-48772200  
mytileDiff25p200.hypo\_CpG.Chr19.48792201-48792400  
mytileDiff25p200.hypo\_CpG.Chr19.49664601-49664800  
mytileDiff25p200.hypo\_CpG.Chr19.49723001-49723200  
mytileDiff25p200.hypo\_CpG.Chr19.50052001-50052200  
mytileDiff25p200.hypo\_CpG.Chr19.50289001-50289200  
mytileDiff25p200.hypo\_CpG.Chr20.1188401-1188600  
mytileDiff25p200.hypo\_CpG.Chr20.1707001-1707200  
mytileDiff25p200.hypo\_CpG.Chr20.2723001-2723200  
mytileDiff25p200.hypo\_CpG.Chr20.3111801-3112000  
mytileDiff25p200.hypo\_CpG.Chr20.7200001-7200200  
mytileDiff25p200.hypo\_CpG.Chr20.8996201-8996400  
mytileDiff25p200.hypo\_CpG.Chr20.8996201-8996400  
mytileDiff25p200.hypo\_CpG.Chr20.12626601-12626800  
mytileDiff25p200.hypo\_CpG.Chr20.14774801-14775000  
mytileDiff25p200.hypo\_CpG.Chr20.18662401-18662600  
mytileDiff25p200.hypo\_CpG.Chr20.29609801-29610000  
mytileDiff25p200.hypo\_CpG.Chr20.29609801-29610000  
mytileDiff25p200.hypo\_CpG.Chr20.32245201-32245400  
mytileDiff25p200.hypo\_CpG.Chr20.35028801-35029000  
mytileDiff25p200.hypo\_CpG.Chr20.35283001-35283200  
mytileDiff25p200.hypo\_CpG.Chr20.35426801-35427000  
mytileDiff25p200.hypo\_CpG.Chr20.35944201-35944400  
mytileDiff25p200.hypo\_CpG.Chr20.36315801-36316000  
mytileDiff25p200.hypo\_CpG.Chr20.37153201-37153400  
mytileDiff25p200.hypo\_CpG.Chr20.37189801-37190000  
mytileDiff25p200.hypo\_CpG.Chr20.38506001-38506200  
mytileDiff25p200.hypo\_CpG.Chr20.38780001-38780200  
mytileDiff25p200.hypo\_CpG.Chr20.38793201-38793400  
mytileDiff25p200.hypo\_CpG.Chr20.39251801-39252000  
mytileDiff25p200.hypo\_CpG.Chr20.39328401-39328600



mytileDiff25p200.hypo\_CpG.Chr20.39992201-39992400  
mytileDiff25p200.hypo\_CpG.Chr20.40297201-40297400  
mytileDiff25p200.hypo\_CpG.Chr20.40365201-40365400  
mytileDiff25p200.hypo\_CpG.Chr20.41091001-41091200  
mytileDiff25p200.hypo\_CpG.Chr20.42417001-42417200  
mytileDiff25p200.hypo\_CpG.Chr20.42417801-42418000  
mytileDiff25p200.hypo\_CpG.Chr20.42441401-42441600  
mytileDiff25p200.hypo\_CpG.Chr20.42639601-42639800  
mytileDiff25p200.hypo\_CpG.Chr20.42840201-42840400  
mytileDiff25p200.hypo\_CpG.Chr20.43404601-43404800  
mytileDiff25p200.hypo\_CpG.Chr20.44505401-44505600  
mytileDiff25p200.hypo\_CpG.Chr20.45270801-45271000  
mytileDiff25p200.hypo\_CpG.Chr20.45355801-45356000  
mytileDiff25p200.hypo\_CpG.Chr20.45478001-45478200  
mytileDiff25p200.hypo\_CpG.Chr20.46646601-46646800  
mytileDiff25p200.hypo\_CpG.Chr20.47470601-47470800  
mytileDiff25p200.hypo\_CpG.scaffold\_21.276801-277000  
mytileDiff25p200.hypo\_CpG.scaffold\_21.1291801-1292000  
mytileDiff25p200.hypo\_CpG.scaffold\_31.213601-213800  
mytileDiff25p200.hypo\_CpG.scaffold\_31.258401-258600  
mytileDiff25p200.hypo\_CpG.scaffold\_32.168401-168600  
mytileDiff25p200.hypo\_CpG.scaffold\_32.247601-247800

---

**nes in CpG context.**

| <b>REGION</b>                      | <b>GENE ID</b>  |
|------------------------------------|-----------------|
| 3'UTR                              | Glyma.01G005200 |
| 3'UTR (160bp)                      | Glyma.01G007300 |
| GENE BODY                          | Glyma.01G007300 |
| 3'UTR                              | Glyma.01G021600 |
| 3'UTR                              | Glyma.01G021600 |
| GENE BODY                          | Glyma.01G023600 |
| GENE BODY                          | Glyma.01G023700 |
| PROMOTER                           | Glyma.01G038200 |
| GENE BODY                          | Glyma.01G038300 |
| GENE BODY                          | Glyma.01G038700 |
| GENE BODY                          | Glyma.01G044000 |
| GENE BODY                          | Glyma.01G059100 |
| GENE BODY                          | Glyma.01G063700 |
| GENE BODY                          | Glyma.01G065600 |
| GENE BODY                          | Glyma.01G074400 |
| GENE BODY                          | Glyma.01G074500 |
| 5'UTR(60bp); GENE BODY (140 bp)    | Glyma.01G089000 |
| 5'UTR(171bp); GENE BODY (29bp)     | Glyma.01G089000 |
| 5'UTR(108bp); PROMOTER (92bp)      | Glyma.01G089000 |
| GENE BODY                          | Glyma.01G093900 |
| GENE BODY                          | Glyma.01G095100 |
| 5' UTR                             | Glyma.01G114500 |
| 5' UTR                             | Glyma.01G114500 |
| GENE BODY                          | Glyma.01G117500 |
| PROMOTER                           | Glyma.01G120100 |
| GENE BODY                          | Glyma.01G134300 |
| GENE BODY                          | Glyma.01G135900 |
| GENE BODY                          | Glyma.01G140200 |
| GENE BODY                          | Glyma.01G141900 |
| GENE BODY                          | Glyma.01G145600 |
| GENE BODY                          | Glyma.01G145600 |
| GENE BODY (117bp); PROMOTER (83bp) | Glyma.01G145700 |
| PROMOTER                           | Glyma.01G145700 |
| PROMOTER                           | Glyma.01G145800 |
| PROMOTER                           | Glyma.01G145800 |
| 5'UTR(100bp); GENE BODY (100bp)    | Glyma.01G156800 |
| GENE BODY                          | Glyma.01G162200 |
| GENE BODY                          | Glyma.01G166100 |
| GENE BODY                          | Glyma.01G168900 |
| GENE BODY                          | Glyma.01G176400 |
| GENE BODY                          | Glyma.01G204900 |

|                                    |                 |
|------------------------------------|-----------------|
| GENE BODY                          | Glyma.01G209300 |
| 5'UTR (33); PROMOTER (167bp)       | Glyma.01G226000 |
| GENE BODY                          | Glyma.01G226800 |
| GENE BODY                          | Glyma.01G234300 |
| GENE BODY                          | Glyma.01G235300 |
| GENE BODY                          | Glyma.01G238200 |
| GENE BODY (169bp); 3'UTR (31bp)    | Glyma.01G243200 |
| PROMOTER (167bp); GENE BODY (33bp) | Glyma.01G245200 |
| GENE BODY                          | Glyma.02G006500 |
| GENE BODY                          | Glyma.02G021900 |
| GENE BODY                          | Glyma.02G042000 |
| GENE BODY                          | Glyma.02G048100 |
| GENE BODY                          | Glyma.02G056800 |
| GENE BODY                          | Glyma.02G062200 |
| GENE BODY                          | Glyma.02G066700 |
| GENE BODY                          | Glyma.02G067100 |
| PROMOTER                           | Glyma.02G085500 |
| GENE BODY                          | Glyma.02G089000 |
| GENE BODY                          | Glyma.02G091300 |
| 3'UTR(3bp); GENE BODY (197bp)      | Glyma.02G098100 |
| GENE BODY                          | Glyma.02G099300 |
| GENE BODY                          | Glyma.02G100200 |
| GENE BODY                          | Glyma.02G103100 |
| GENE BODY                          | Glyma.02G103100 |
| GENE BODY                          | Glyma.02G106100 |
| PROMOTER                           | Glyma.02G129400 |
| PROMOTER                           | Glyma.02G138900 |
| 5'UTR(141bp); PROMOTER (59bp)      | Glyma.02G139000 |
| GENE BODY                          | Glyma.02G141600 |
| PROMOTER                           | Glyma.02G141900 |
| GENE BODY                          | Glyma.02G145300 |
| GENE BODY                          | Glyma.02G160400 |
| GENE BODY                          | Glyma.02G161100 |
| GENE BODY                          | Glyma.02G162900 |
| GENE BODY                          | Glyma.02G166500 |
| PROMOTER(148bp); GENE BODY (52bp)  | Glyma.02G168200 |
| GENE BODY                          | Glyma.02G170500 |
| GENE BODY                          | Glyma.02G172600 |
| GENE BODY                          | Glyma.02G184100 |
| GENE BODY                          | Glyma.02G185900 |
| GENE BODY                          | Glyma.02G186300 |

|                                    |                 |
|------------------------------------|-----------------|
| GENE BODY                          | Glyma.02G189600 |
| 5' UTR                             | Glyma.02G197100 |
| GENE BODY                          | Glyma.02G201600 |
| PROMOTER                           | Glyma.02G201800 |
| GENE BODY                          | Glyma.02G202300 |
| GENE BODY                          | Glyma.02G215800 |
| GENE BODY                          | Glyma.02G218100 |
| GENE BODY                          | Glyma.02G219600 |
| PROMOTER                           | Glyma.02G221500 |
| GENE BODY                          | Glyma.02G251700 |
| GENE BODY                          | Glyma.02G257400 |
| GENE BODY                          | Glyma.02G269300 |
| 3'UTR (138bp); GENE BODY (62bp)    | Glyma.02G270000 |
| GENE BODY                          | Glyma.02G270300 |
| GENE BODY                          | Glyma.02G274600 |
| GENE BODY                          | Glyma.02G281700 |
| 3'UTR                              | Glyma.02G295200 |
| GENE BODY                          | Glyma.02G296200 |
| GENE BODY                          | Glyma.02G298500 |
| GENE BODY                          | Glyma.02G305000 |
| GENE BODY                          | Glyma.02G312000 |
| GENE BODY                          | Glyma.03G022900 |
| GENE BODY                          | Glyma.03G027600 |
| PROMOTER                           | Glyma.03G031900 |
| GENE BODY (112bp); PROMOTER (88bp) | Glyma.03G044100 |
| GENE BODY                          | Glyma.03G058400 |
| GENE BODY                          | Glyma.03G076800 |
| GENE BODY                          | Glyma.03G076900 |
| GENE BODY                          | Glyma.03G079800 |
| GENE BODY                          | Glyma.03G080300 |
| 5'UTR(76bp); PROMOTER (124bp)      | Glyma.03G092600 |
| PROMOTER                           | Glyma.03G100100 |
| GENE BODY                          | Glyma.03G116900 |
| GENE BODY                          | Glyma.03G121100 |
| GENE BODY                          | Glyma.03G127600 |
| GENE BODY                          | Glyma.03G132000 |
| GENE BODY                          | Glyma.03G132800 |
| GENE BODY                          | Glyma.03G138400 |
| 5' UTR                             | Glyma.03G143300 |
| GENE BODY                          | Glyma.03G146200 |
| PROMOTER                           | Glyma.03G173600 |
| PROMOTER                           | Glyma.03G179900 |

|                                |                 |
|--------------------------------|-----------------|
| GENE BODY                      | Glyma.03G189700 |
| PROMOTER                       | Glyma.03G206200 |
| GENE BODY                      | Glyma.03G223300 |
| 5' UTR                         | Glyma.03G225700 |
| 5' UTR                         | Glyma.03G225700 |
| PROMOTER                       | Glyma.03G225800 |
| PROMOTER                       | Glyma.03G225800 |
| GENE BODY                      | Glyma.03G235200 |
| GENE BODY                      | Glyma.03G247300 |
| GENE BODY                      | Glyma.03G256800 |
| GENE BODY                      | Glyma.03G264500 |
| GENE BODY                      | Glyma.04G010500 |
| GENE BODY                      | Glyma.04G016300 |
| GENE BODY                      | Glyma.04G017000 |
| GENE BODY                      | Glyma.04G025000 |
| GENE BODY                      | Glyma.04G025400 |
| GENE BODY                      | Glyma.04G028300 |
| GENE BODY                      | Glyma.04G034900 |
| GENE BODY                      | Glyma.04G039800 |
| GENE BODY                      | Glyma.04G039800 |
| GENE BODY                      | Glyma.04G053800 |
| GENE BODY                      | Glyma.04G064300 |
| 3'UTR(16bp); GENE BODY(184bp)  | Glyma.04G075200 |
| GENE BODY                      | Glyma.04G088300 |
| GENE BODY                      | Glyma.04G090500 |
| GENE BODY                      | Glyma.04G092200 |
| GENE BODY                      | Glyma.04G096100 |
| PROMOTER                       | Glyma.04G113800 |
| GENE BODY                      | Glyma.04G124800 |
| 3'UTR(42bp); GENE BODY (158bp) | Glyma.04G133800 |
| GENE BODY                      | Glyma.04G156500 |
| 5'UTR(95bp); GENE BODY(105bp)  | Glyma.04G157200 |
| GENE BODY                      | Glyma.04G176500 |
| GENE BODY                      | Glyma.04G177300 |
| PROMOTER                       | Glyma.04G188200 |
| GENE BODY                      | Glyma.04G190500 |
| GENE BODY                      | Glyma.04G193800 |
| GENE BODY                      | Glyma.04G210400 |
| GENE BODY                      | Glyma.04G245400 |
| GENE BODY                      | Glyma.04G252700 |
| GENE BODY                      | Glyma.05G000600 |
| GENE BODY                      | Glyma.05G004900 |
| GENE BODY                      | Glyma.05G009500 |

|                                |                 |
|--------------------------------|-----------------|
| GENE BODY                      | Glyma.05G013500 |
| GENE BODY                      | Glyma.05G020900 |
| GENE BODY                      | Glyma.05G030700 |
| GENE BODY                      | Glyma.05G031300 |
| GENE BODY                      | Glyma.05G032600 |
| GENE BODY                      | Glyma.05G032600 |
| GENE BODY                      | Glyma.05G035900 |
| GENE BODY                      | Glyma.05G040600 |
| GENE BODY                      | Glyma.05G041600 |
| GENE BODY                      | Glyma.05G047400 |
| 3'UTR                          | Glyma.05G049500 |
| GENE BODY                      | Glyma.05G060200 |
| GENE BODY                      | Glyma.05G062800 |
| PROMOTER (92bp); 5'UTR(108bp)  | Glyma.05G067200 |
| GENE BODY                      | Glyma.05G068200 |
| GENE BODY                      | Glyma.05G069000 |
| GENE BODY                      | Glyma.05G075100 |
| PROMOTER                       | Glyma.05G075200 |
| GENE BODY                      | Glyma.05G080100 |
| GENE BODY                      | Glyma.05G080100 |
| PROMOTER                       | Glyma.05G084500 |
| GENE BODY                      | Glyma.05G110200 |
| GENE BODY                      | Glyma.05G118100 |
| 3'UTR(153bp); GENE BODY (47bp) | Glyma.05G118200 |
| GENE BODY                      | Glyma.05G120400 |
| GENE BODY                      | Glyma.05G143100 |
| GENE BODY                      | Glyma.05G150300 |
| GENE BODY                      | Glyma.05G151100 |
| GENE BODY                      | Glyma.05G163700 |
| GENE BODY                      | Glyma.05G176400 |
| PROMOTER                       | Glyma.05G180000 |
| GENE BODY                      | Glyma.05G186200 |
| GENE BODY                      | Glyma.05G194700 |
| GENE BODY                      | Glyma.05G200600 |
| GENE BODY                      | Glyma.05G208100 |
| GENE BODY                      | Glyma.05G221200 |
| GENE BODY                      | Glyma.05G224700 |
| GENE BODY                      | Glyma.06G016500 |
| GENE BODY                      | Glyma.06G016500 |
| GENE BODY                      | Glyma.06G016600 |
| GENE BODY                      | Glyma.06G016700 |
| GENE BODY                      | Glyma.06G018700 |
| GENE BODY                      | Glyma.06G049000 |

|                                  |                 |
|----------------------------------|-----------------|
| PROMOTER                         | Glyma.06G090100 |
| PROMOTER                         | Glyma.06G090100 |
| GENE BODY                        | Glyma.06G098300 |
| GENE BODY                        | Glyma.06G099100 |
| 3'UTR(32bp); GENE BODY(168bp)    | Glyma.06G108900 |
| GENE BODY                        | Glyma.06G111200 |
| GENE BODY                        | Glyma.06G116500 |
| GENE BODY                        | Glyma.06G122500 |
| GENE BODY                        | Glyma.06G123000 |
| 5' UTR(73bp); GENE BODY(127bp)   | Glyma.06G130800 |
| GENE BODY                        | Glyma.06G137800 |
| GENE BODY                        | Glyma.06G146400 |
| GENE BODY                        | Glyma.06G148600 |
| (PROMOTER 170); 5' UTR(30bp)     | Glyma.06G158600 |
| GENE BODY                        | Glyma.06G159900 |
| GENE BODY                        | Glyma.06G163900 |
| GENE BODY                        | Glyma.06G173400 |
| GENE BODY                        | Glyma.06G173500 |
| 5' UTR(49bp); GENE BODY(151bp)   | Glyma.06G173600 |
| 5' UTR(18bp);GENE BODY(182bp)    | Glyma.06G195300 |
| GENE BODY                        | Glyma.06G195300 |
| GENE BODY                        | Glyma.06G199800 |
| GENE BODY                        | Glyma.06G201500 |
| GENE BODY                        | Glyma.06G208900 |
| 3'UTR(133bp); GENE BODY (67bp)   | Glyma.06G209300 |
| PROMOTER                         | Glyma.06G212600 |
| PROMOTER(61bp); GENE BODY(139bp) | Glyma.06G212700 |
| GENE BODY                        | Glyma.06G213300 |
| GENE BODY                        | Glyma.06G214500 |
| GENE BODY                        | Glyma.06G218500 |
| GENE BODY                        | Glyma.06G220500 |
| GENE BODY                        | Glyma.06G223800 |
| GENE BODY                        | Glyma.06G228000 |
| GENE BODY                        | Glyma.06G230100 |
| GENE BODY                        | Glyma.06G237900 |
| GENE BODY                        | Glyma.06G238500 |
| GENE BODY                        | Glyma.06G238700 |
| 3'UTR(99bp); GENE BODY(2bp)      | Glyma.06G239200 |
| GENE BODY                        | Glyma.06G242800 |
| PROMOTER                         | Glyma.06G247200 |
| GENE BODY                        | Glyma.06G254000 |
| 5' UTR                           | Glyma.06G256000 |
| 5' UTR                           | Glyma.06G256000 |

|                                |                 |
|--------------------------------|-----------------|
| GENE BODY                      | Glyma.06G259800 |
| GENE BODY                      | Glyma.06G260100 |
| GENE BODY                      | Glyma.06G260100 |
| GENE BODY                      | Glyma.06G265900 |
| GENE BODY                      | Glyma.06G268700 |
| GENE BODY                      | Glyma.06G268800 |
| 5' UTR                         | Glyma.06G268900 |
| GENE BODY                      | Glyma.06G269500 |
| GENE BODY                      | Glyma.06G275600 |
| PROMOTER                       | Glyma.06G289600 |
| GENE BODY                      | Glyma.06G297300 |
| GENE BODY                      | Glyma.06G308100 |
| GENE BODY                      | Glyma.06G311400 |
| GENE BODY                      | Glyma.06G318300 |
| GENE BODY                      | Glyma.07G003600 |
| GENE BODY                      | Glyma.07G004800 |
| GENE BODY                      | Glyma.07G006600 |
| GENE BODY                      | Glyma.07G008200 |
| GENE BODY                      | Glyma.07G009000 |
| GENE BODY                      | Glyma.07G026800 |
| GENE BODY                      | Glyma.07G028100 |
| GENE BODY                      | Glyma.07G029200 |
| GENE BODY                      | Glyma.07G029500 |
| GENE BODY                      | Glyma.07G034600 |
| GENE BODY                      | Glyma.07G043700 |
| GENE BODY                      | Glyma.07G046000 |
| GENE BODY                      | Glyma.07G047300 |
| GENE BODY                      | Glyma.07G069500 |
| GENE BODY                      | Glyma.07G069600 |
| GENE BODY                      | Glyma.07G072900 |
| GENE BODY                      | Glyma.07G087700 |
| 3'UTR                          | Glyma.07G092600 |
| 5'UTR(100bp); GENE BODY(100bp) | Glyma.07G094000 |
| GENE BODY                      | Glyma.07G103200 |
| PROMOTER                       | Glyma.07G107300 |
| GENE BODY                      | Glyma.07G119900 |
| GENE BODY                      | Glyma.07G128300 |
| PROMOTER                       | Glyma.07G136300 |
| GENE BODY                      | Glyma.07G152100 |
| PROMOTER                       | Glyma.07G154400 |
| GENE BODY                      | Glyma.07G156500 |
| GENE BODY                      | Glyma.07G169700 |
| GENE BODY                      | Glyma.07G170200 |



|                                |                 |
|--------------------------------|-----------------|
| GENE BODY                      | Glyma.07G171000 |
| GENE BODY                      | Glyma.07G177100 |
| GENE BODY                      | Glyma.07G184700 |
| GENE BODY                      | Glyma.07G197000 |
| GENE BODY                      | Glyma.07G204000 |
| GENE BODY                      | Glyma.07G204700 |
| GENE BODY                      | Glyma.07G205900 |
| 3'UTR                          | Glyma.07G218100 |
| GENE BODY                      | Glyma.07G224600 |
| GENE BODY                      | Glyma.07G225000 |
| GENE BODY                      | Glyma.07G230600 |
| PROMOTER                       | Glyma.07G232300 |
| GENE BODY                      | Glyma.07G236300 |
| GENE BODY                      | Glyma.07G259300 |
| GENE BODY                      | Glyma.07G264000 |
| GENE BODY                      | Glyma.08G004700 |
| GENE BODY                      | Glyma.08G013000 |
| GENE BODY                      | Glyma.08G013500 |
| 3'UTR(55bp); GENE BODY (145bp) | Glyma.08G027700 |
| GENE BODY                      | Glyma.08G028200 |
| 3'UTR                          | Glyma.08G028400 |
| GENE BODY                      | Glyma.08G041700 |
| GENE BODY                      | Glyma.08G041700 |
| GENE BODY                      | Glyma.08G044900 |
| GENE BODY                      | Glyma.08G063500 |
| GENE BODY                      | Glyma.08G065300 |
| GENE BODY                      | Glyma.08G071900 |
| GENE BODY                      | Glyma.08G074600 |
| 5' UTR(6bp); GENE BODY(194bp)  | Glyma.08G075700 |
| GENE BODY                      | Glyma.08G082500 |
| PROMOTER (195bp); 5'UTR(5bp)   | Glyma.08G083400 |
| 3'UTR(78bp); GENE BODY (122bp) | Glyma.08G092700 |
| GENE BODY                      | Glyma.08G097800 |
| GENE BODY                      | Glyma.08G100800 |
| GENE BODY                      | Glyma.08G108500 |
| GENE BODY                      | Glyma.08G111500 |
| GENE BODY                      | Glyma.08G125700 |
| GENE BODY                      | Glyma.08G141100 |
| GENE BODY                      | Glyma.08G151600 |
| GENE BODY                      | Glyma.08G170000 |
| 3'UTR(6bp); GENE BODY (194bp)  | Glyma.08G171900 |
| PROMOTER                       | Glyma.08G191200 |
| GENE BODY                      | Glyma.08G192200 |

|                                  |                 |
|----------------------------------|-----------------|
| GENE BODY                        | Glyma.08G202800 |
| GENE BODY                        | Glyma.08G209500 |
| GENE BODY                        | Glyma.08G222300 |
| GENE BODY                        | Glyma.08G228000 |
| 3'UTR                            | Glyma.08G233900 |
| 3'UTR                            | Glyma.08G233900 |
| 3'UTR                            | Glyma.08G233900 |
| 5'UTR(37bp); PROMOTER(163bp)     | Glyma.08G233900 |
| 5'UTR(21bp); GENE BODY(179bp)    | Glyma.08G233900 |
| GENE BODY                        | Glyma.08G236700 |
| GENE BODY                        | Glyma.08G237500 |
| 3'UTR(154bp); GENE BODY (46bp)   | Glyma.08G238000 |
| GENE BODY                        | Glyma.08G238000 |
| GENE BODY                        | Glyma.08G238800 |
| 3'UTR(93bp); GENE BODY (107bp)   | Glyma.08G241100 |
| GENE BODY                        | Glyma.08G242700 |
| GENE BODY                        | Glyma.08G249400 |
| PROMOTER                         | Glyma.08G258900 |
| GENE BODY                        | Glyma.08G259000 |
| GENE BODY                        | Glyma.08G275100 |
| GENE BODY(182bp); PROMOTER(18bp) | Glyma.08G275100 |
| PROMOTER                         | Glyma.08G275100 |
| GENE BODY                        | Glyma.08G276200 |
| GENE BODY                        | Glyma.08G276200 |
| GENE BODY                        | Glyma.08G279300 |
| 3'UTR                            | Glyma.08G282400 |
| GENE BODY                        | Glyma.08G283600 |
| PROMOTER                         | Glyma.08G300900 |
| GENE BODY                        | Glyma.08G324900 |
| 3'UTR(20bp); GENE BODY (180bp)   | Glyma.08G362400 |
| GENE BODY                        | Glyma.09G002600 |
| GENE BODY                        | Glyma.09G002700 |
| GENE BODY                        | Glyma.09G013300 |
| GENE BODY                        | Glyma.09G015100 |
| GENE BODY                        | Glyma.09G016800 |
| GENE BODY                        | Glyma.09G017000 |
| GENE BODY                        | Glyma.09G023600 |
| GENE BODY                        | Glyma.09G024400 |
| 5' UTR(75bp); GENE BODY(125bp)   | Glyma.09G025000 |
| GENE BODY                        | Glyma.09G025400 |
| PROMOTER                         | Glyma.09G027300 |
| PROMOTER                         | Glyma.09G029700 |
| GENE BODY                        | Glyma.09G030300 |

|                                   |                 |
|-----------------------------------|-----------------|
| 5' UTR(67bp); GENE BODY(133bp)    | Glyma.09G046700 |
| GENE BODY                         | Glyma.09G056100 |
| 5' UTR(62bp); GENE BODY(138bp)    | Glyma.09G057800 |
| GENE BODY                         | Glyma.09G070600 |
| PROMOTER                          | Glyma.09G072500 |
| PROMOTER                          | Glyma.09G078600 |
| GENE BODY                         | Glyma.09G089400 |
| GENE BODY                         | Glyma.09G120200 |
| GENE BODY                         | Glyma.09G148000 |
| GENE BODY                         | Glyma.09G148500 |
| GENE BODY                         | Glyma.09G170600 |
| GENE BODY                         | Glyma.09G171000 |
| 5'UTR (82); PROMOTER (118bp)      | Glyma.09G171400 |
| GENE BODY                         | Glyma.09G188000 |
| 3'UTR(29bp); GENE BODY (171bp)    | Glyma.09G190300 |
| GENE BODY                         | Glyma.09G191600 |
| GENE BODY                         | Glyma.09G199100 |
| PROMOTER                          | Glyma.09G202900 |
| GENE BODY(95bp); PROMOTER (105bp) | Glyma.09G219500 |
| PROMOTER                          | Glyma.09G219600 |
| GENE BODY                         | Glyma.09G228300 |
| PROMOTER                          | Glyma.09G230600 |
| GENE BODY                         | Glyma.09G234400 |
| GENE BODY                         | Glyma.09G237200 |
| GENE BODY                         | Glyma.09G246500 |
| GENE BODY                         | Glyma.09G251200 |
| 3'UTR                             | Glyma.09G258900 |
| 3'UTR(11bp); GENE BODY (189bp)    | Glyma.09G259200 |
| GENE BODY                         | Glyma.09G271700 |
| GENE BODY                         | Glyma.09G279900 |
| GENE BODY                         | Glyma.10G009700 |
| GENE BODY                         | Glyma.10G020700 |
| GENE BODY                         | Glyma.10G023000 |
| GENE BODY                         | Glyma.10G025000 |
| GENE BODY                         | Glyma.10G028000 |
| GENE BODY                         | Glyma.10G030000 |
| 5' UTR(6bp); GENE BODY(194bp)     | Glyma.10G054400 |
| GENE BODY                         | Glyma.10G083500 |
| GENE BODY                         | Glyma.10G096900 |
| PROMOTER(171bp); 5'UTR(29bp)      | Glyma.10G098700 |
| GENE BODY                         | Glyma.10G102200 |
| GENE BODY                         | Glyma.10G102900 |
| GENE BODY (115bp); PROMOTER(85bp) | Glyma.10G102900 |

|                                |                 |
|--------------------------------|-----------------|
| GENE BODY                      | Glyma.10G118100 |
| GENE BODY                      | Glyma.10G120900 |
| GENE BODY                      | Glyma.10G143600 |
| GENE BODY                      | Glyma.10G148600 |
| GENE BODY                      | Glyma.10G149700 |
| GENE BODY                      | Glyma.10G151500 |
| GENE BODY                      | Glyma.10G151700 |
| GENE BODY                      | Glyma.10G166200 |
| 3'UTR                          | Glyma.10G171500 |
| GENE BODY                      | Glyma.10G187800 |
| GENE BODY                      | Glyma.10G189200 |
| GENE BODY                      | Glyma.10G191500 |
| PROMOTER                       | Glyma.10G195900 |
| GENE BODY                      | Glyma.10G201600 |
| 5' UTR(93bp); GENE BODY(107bp) | Glyma.10G208100 |
| GENE BODY                      | Glyma.10G209400 |
| GENE BODY                      | Glyma.10G209600 |
| 3'UTR(102bp)                   | Glyma.10G233300 |
| GENE BODY                      | Glyma.10G241900 |
| GENE BODY                      | Glyma.10G283000 |
| 3'UTR(47bp); GENE BODY(153bp)  | Glyma.10G294300 |
| GENE BODY                      | Glyma.11G002600 |
| GENE BODY                      | Glyma.11G008700 |
| GENE BODY                      | Glyma.11G039900 |
| 3'UTR(125bp); GENE BODY(75bp)  | Glyma.11G040000 |
| GENE BODY                      | Glyma.11G057000 |
| GENE BODY                      | Glyma.11G065700 |
| GENE BODY                      | Glyma.11G082200 |
| PROMOTER                       | Glyma.11G102700 |
| GENE BODY                      | Glyma.11G102800 |
| GENE BODY                      | Glyma.11G108500 |
| GENE BODY                      | Glyma.11G109800 |
| GENE BODY                      | Glyma.11G110100 |
| GENE BODY                      | Glyma.11G152600 |
| GENE BODY                      | Glyma.11G188100 |
| GENE BODY                      | Glyma.11G188900 |
| 3'UTR(104bp); GENE BODY (96bp) | Glyma.11G191000 |
| GENE BODY                      | Glyma.11G192500 |
| GENE BODY                      | Glyma.11G194700 |
| GENE BODY                      | Glyma.11G222900 |
| GENE BODY                      | Glyma.11G228600 |
| PROMOTER                       | Glyma.11G228700 |
| 5' UTR(2bp); GENE BODY(198bp)  | Glyma.11G251600 |

|                                    |                 |
|------------------------------------|-----------------|
| GENE BODY                          | Glyma.12G004100 |
| GENE BODY                          | Glyma.12G004100 |
| GENE BODY                          | Glyma.12G027600 |
| GENE BODY                          | Glyma.12G036400 |
| GENE BODY                          | Glyma.12G051000 |
| GENE BODY                          | Glyma.12G051000 |
| GENE BODY                          | Glyma.12G066300 |
| 5'UTR(165bp); PROMOTER (35bp)      | Glyma.12G066400 |
| GENE BODY                          | Glyma.12G067900 |
| PROMOTER                           | Glyma.12G074700 |
| 3'UTR(84bp); GENE BODY (116bp)     | Glyma.12G082100 |
| GENE BODY                          | Glyma.12G084300 |
| GENE BODY                          | Glyma.12G133500 |
| GENE BODY                          | Glyma.12G136600 |
| PROMOTER                           | Glyma.12G137100 |
| GENE BODY(154bp); PROMOTER(46bp)   | Glyma.12G140800 |
| GENE BODY                          | Glyma.12G155900 |
| GENE BODY                          | Glyma.12G158600 |
| GENE BODY                          | Glyma.12G166100 |
| GENE BODY                          | Glyma.12G180100 |
| GENE BODY                          | Glyma.12G180800 |
| GENE BODY                          | Glyma.12G198100 |
| GENE BODY                          | Glyma.12G201100 |
| GENE BODY                          | Glyma.12G203700 |
| GENE BODY                          | Glyma.12G205500 |
| GENE BODY                          | Glyma.12G209100 |
| GENE BODY                          | Glyma.12G214200 |
| GENE BODY                          | Glyma.12G219400 |
| GENE BODY                          | Glyma.12G226700 |
| GENE BODY                          | Glyma.12G229900 |
| GENE BODY                          | Glyma.12G230600 |
| GENE BODY                          | Glyma.12G241600 |
| GENE BODY                          | Glyma.13G006200 |
| GENE BODY                          | Glyma.13G026100 |
| GENE BODY (158bp)                  | Glyma.13G030000 |
| GENE BODY (93bp); PROMOTER (107bp) | Glyma.13G030000 |
| PROMOTER                           | Glyma.13G030100 |
| PROMOTER                           | Glyma.13G030100 |
| GENE BODY                          | Glyma.13G036000 |
| 3'UTR                              | Glyma.13G036700 |
| PROMOTER                           | Glyma.13G038300 |
| GENE BODY                          | Glyma.13G048300 |
| GENE BODY                          | Glyma.13G048300 |

|                                |                 |
|--------------------------------|-----------------|
| GENE BODY                      | Glyma.13G048300 |
| GENE BODY                      | Glyma.13G053700 |
| GENE BODY                      | Glyma.13G058600 |
| GENE BODY                      | Glyma.13G058800 |
| PROMOTER                       | Glyma.13G062000 |
| GENE BODY                      | Glyma.13G063600 |
| PROMOTER                       | Glyma.13G067700 |
| GENE BODY                      | Glyma.13G073900 |
| GENE BODY                      | Glyma.13G078200 |
| GENE BODY                      | Glyma.13G078800 |
| GENE BODY                      | Glyma.13G084100 |
| GENE BODY                      | Glyma.13G119100 |
| GENE BODY                      | Glyma.13G127500 |
| GENE BODY                      | Glyma.13G128700 |
| GENE BODY                      | Glyma.13G130000 |
| GENE BODY                      | Glyma.13G130700 |
| PROMOTER                       | Glyma.13G130900 |
| PROMOTER                       | Glyma.13G131000 |
| GENE BODY                      | Glyma.13G135800 |
| GENE BODY                      | Glyma.13G160000 |
| GENE BODY                      | Glyma.13G174500 |
| GENE BODY                      | Glyma.13G189000 |
| 5'UTR (94); PROMOTER (106bp)   | Glyma.13G190500 |
| GENE BODY                      | Glyma.13G194900 |
| GENE BODY                      | Glyma.13G196700 |
| GENE BODY                      | Glyma.13G196900 |
| GENE BODY                      | Glyma.13G198700 |
| 5' UTR(97bp); GENE BODY(103bp) | Glyma.13G209200 |
| GENE BODY                      | Glyma.13G221400 |
| GENE BODY                      | Glyma.13G223400 |
| PROMOTER                       | Glyma.13G225300 |
| GENE BODY                      | Glyma.13G233400 |
| GENE BODY                      | Glyma.13G235300 |
| GENE BODY                      | Glyma.13G239300 |
| GENE BODY                      | Glyma.13G244200 |
| GENE BODY                      | Glyma.13G253600 |
| GENE BODY                      | Glyma.13G259100 |
| GENE BODY                      | Glyma.13G275400 |
| GENE BODY                      | Glyma.13G277700 |
| GENE BODY                      | Glyma.13G278800 |
| 3'UTR(129bp); GENE BODY (71bp) | Glyma.13G281900 |
| 5' UTR(111bp);GENE BODY(89bp)  | Glyma.13G283900 |
| PROMOTER                       | Glyma.13G289400 |

|                                                  |                 |
|--------------------------------------------------|-----------------|
| GENE BODY                                        | Glyma.13G296400 |
| 3'UTR(107bp); GENE BODY (93bp)                   | Glyma.13G302900 |
| PROMOTER                                         | Glyma.13G305700 |
| GENE BODY                                        | Glyma.13G322000 |
| GENE BODY                                        | Glyma.13G326400 |
| GENE BODY                                        | Glyma.13G342500 |
| GENE BODY                                        | Glyma.13G355800 |
| GENE BODY                                        | Glyma.13G371300 |
| GENE BODY                                        | Glyma.14G018300 |
| GENE BODY                                        | Glyma.14G025300 |
| GENE BODY                                        | Glyma.14G044300 |
| GENE BODY                                        | Glyma.14G044900 |
| GENE BODY                                        | Glyma.14G066000 |
| GENE BODY                                        | Glyma.14G066100 |
| GENE BODY                                        | Glyma.14G066600 |
| 3'UTR                                            | Glyma.14G083300 |
| GENE BODY                                        | Glyma.14G084400 |
| GENE BODY                                        | Glyma.14G092100 |
| 5'UTR (177bp); PROMOTER (23bp)                   | Glyma.14G095000 |
| GENE BODY                                        | Glyma.14G095200 |
| GENE BODY                                        | Glyma.14G098000 |
| GENE BODY                                        | Glyma.14G098100 |
| GENE BODY                                        | Glyma.14G099300 |
| PROMOTER                                         | Glyma.14G106300 |
| PROMOTER                                         | Glyma.14G108800 |
| GENE BODY                                        | Glyma.14G112200 |
| 3'UTR                                            | Glyma.14G112600 |
| GENE BODY                                        | Glyma.14G112700 |
| PROMOTER (173bp); 5'UTR (27bp)                   | Glyma.14G121200 |
| GENE BODY                                        | Glyma.14G129100 |
| 5'UTR(14bp); GENE BODY(186bp)                    | Glyma.14G132500 |
| GENE BODY                                        | Glyma.14G132500 |
| PROMOTER                                         | Glyma.14G137100 |
| GENE BODY                                        | Glyma.14G141800 |
| PROMOTER (37bp); 5'UTR (122bp); GENE BODY (41bp) | Glyma.14G159200 |
| GENE BODY                                        | Glyma.14G159200 |
| PROMOTER                                         | Glyma.14G159200 |
| GENE BODY                                        | Glyma.14G160400 |
| GENE BODY                                        | Glyma.14G162300 |
| GENE BODY                                        | Glyma.14G170300 |
| GENE BODY                                        | Glyma.14G170300 |
| GENE BODY                                        | Glyma.14G179100 |
| GENE BODY                                        | Glyma.14G179200 |

|                                                |                 |
|------------------------------------------------|-----------------|
| GENE BODY                                      | Glyma.14G183500 |
| 5' UTR(23bp); GENE BODY(177bp)                 | Glyma.14G186900 |
| GENE BODY                                      | Glyma.14G190200 |
| 3'UTR(72bp); GENE BODY (128bp)                 | Glyma.14G190400 |
| GENE BODY                                      | Glyma.14G190900 |
| GENE BODY                                      | Glyma.14G200600 |
| GENE BODY                                      | Glyma.14G204100 |
| PROMOTER                                       | Glyma.14G222200 |
| PROMOTER                                       | Glyma.15G015100 |
| GENE BODY                                      | Glyma.15G017200 |
| GENE BODY                                      | Glyma.15G023800 |
| 5' UTR                                         | Glyma.15G025900 |
| GENE BODY                                      | Glyma.15G040100 |
| 3'UTR                                          | Glyma.15G056300 |
| PROMOTER                                       | Glyma.15G056400 |
| GENE BODY                                      | Glyma.15G058700 |
| GENE BODY                                      | Glyma.15G074000 |
| 5' UTR                                         | Glyma.15G087600 |
| GENE BODY                                      | Glyma.15G097000 |
| GENE BODY                                      | Glyma.15G098100 |
| GENE BODY                                      | Glyma.15G107500 |
| GENE BODY                                      | Glyma.15G116000 |
| GENE BODY                                      | Glyma.15G125700 |
| 3'UTR(67bp); GENE BODY (124bp)                 | Glyma.15G126100 |
| PROMOTER (28bp); 5'UTR(161bp); GENE BODY(11bp) | Glyma.15G126100 |
| GENE BODY                                      | Glyma.15G154300 |
| GENE BODY                                      | Glyma.15G173300 |
| 5'UTR(26bp); PROMOTER (174bp)                  | Glyma.15G175600 |
| PROMOTER                                       | Glyma.15G175700 |
| GENE BODY                                      | Glyma.15G181200 |
| GENE BODY                                      | Glyma.15G182000 |
| GENE BODY                                      | Glyma.15G182000 |
| GENE BODY                                      | Glyma.15G182000 |
| GENE BODY                                      | Glyma.15G194000 |
| 5' UTR                                         | Glyma.15G197000 |
| 5' UTR                                         | Glyma.15G197000 |
| 5' UTR                                         | Glyma.15G197000 |
| 5'UTR(29bp); GENE BODY(171bp)                  | Glyma.15G198600 |
| GENE BODY                                      | Glyma.15G204500 |
| 3'UTR(105bp); GENE BODY (95bp)                 | Glyma.15G209000 |
| GENE BODY                                      | Glyma.15G212800 |
| GENE BODY                                      | Glyma.15G212800 |
| GENE BODY                                      | Glyma.15G215500 |



|                                                |                 |
|------------------------------------------------|-----------------|
| GENE BODY                                      | Glyma.15G232600 |
| GENE BODY                                      | Glyma.15G235900 |
| PROMOTER                                       | Glyma.15G240300 |
| 5' UTR(107bp);GENE BODY(77bp); PROMOTER (16bp) | Glyma.15G240300 |
| GENE BODY                                      | Glyma.15G245300 |
| GENE BODY                                      | Glyma.15G245300 |
| GENE BODY                                      | Glyma.15G245300 |
| GENE BODY                                      | Glyma.15G248600 |
| 3'UTR(79bp); GENE BODY (121bp)                 | Glyma.15G254100 |
| GENE BODY                                      | Glyma.15G255900 |
| GENE BODY                                      | Glyma.15G271800 |
| 3'UTR(49bp); GENE BODY (151bp)                 | Glyma.15G273500 |
| GENE BODY                                      | Glyma.15G274000 |
| GENE BODY                                      | Glyma.16G004800 |
| GENE BODY                                      | Glyma.16G007000 |
| GENE BODY                                      | Glyma.16G009500 |
| PROMOTER                                       | Glyma.16G014200 |
| GENE BODY                                      | Glyma.16G018300 |
| GENE BODY                                      | Glyma.16G025500 |
| GENE BODY                                      | Glyma.16G039900 |
| GENE BODY                                      | Glyma.16G039900 |
| GENE BODY                                      | Glyma.16G040900 |
| GENE BODY                                      | Glyma.16G049600 |
| GENE BODY                                      | Glyma.16G052700 |
| GENE BODY                                      | Glyma.16G057400 |
| GENE BODY                                      | Glyma.16G066900 |
| GENE BODY                                      | Glyma.16G069300 |
| GENE BODY                                      | Glyma.16G071500 |
| 5'UTR (163bp); PROMOTER (37bp)                 | Glyma.16G077400 |
| GENE BODY                                      | Glyma.16G087100 |
| GENE BODY                                      | Glyma.16G095500 |
| GENE BODY                                      | Glyma.16G101800 |
| PROMOTER                                       | Glyma.16G112800 |
| 5'UTR(136bp); GENE BODY(64bp)                  | Glyma.16G128300 |
| GENE BODY                                      | Glyma.16G128600 |
| GENE BODY                                      | Glyma.16G134700 |
| GENE BODY                                      | Glyma.16G135000 |
| 5' UTR(22bp);GENE BODY(178bp)                  | Glyma.16G138300 |
| GENE BODY                                      | Glyma.16G138300 |
| GENE BODY                                      | Glyma.16G141800 |
| GENE BODY                                      | Glyma.16G144200 |
| GENE BODY                                      | Glyma.16G147000 |
| GENE BODY                                      | Glyma.16G153800 |

|                                  |                 |
|----------------------------------|-----------------|
| GENE BODY                        | Glyma.16G155700 |
| GENE BODY                        | Glyma.16G159600 |
| PROMOTER                         | Glyma.16G186000 |
| GENE BODY                        | Glyma.16G189700 |
| GENE BODY                        | Glyma.16G190100 |
| GENE BODY                        | Glyma.17G010800 |
| GENE BODY                        | Glyma.17G024000 |
| GENE BODY                        | Glyma.17G024800 |
| GENE BODY                        | Glyma.17G027700 |
| GENE BODY                        | Glyma.17G033600 |
| GENE BODY                        | Glyma.17G037600 |
| GENE BODY                        | Glyma.17G039300 |
| GENE BODY                        | Glyma.17G044200 |
| GENE BODY                        | Glyma.17G059800 |
| GENE BODY                        | Glyma.17G060300 |
| GENE BODY                        | Glyma.17G062200 |
| GENE BODY                        | Glyma.17G083300 |
| GENE BODY                        | Glyma.17G083700 |
| GENE BODY                        | Glyma.17G089100 |
| GENE BODY                        | Glyma.17G094300 |
| GENE BODY                        | Glyma.17G100600 |
| GENE BODY                        | Glyma.17G105700 |
| GENE BODY                        | Glyma.17G125500 |
| GENE BODY                        | Glyma.17G129200 |
| GENE BODY                        | Glyma.17G129900 |
| GENE BODY                        | Glyma.17G145000 |
| GENE BODY                        | Glyma.17G145500 |
| GENE BODY                        | Glyma.17G158200 |
| GENE BODY                        | Glyma.17G160700 |
| GENE BODY                        | Glyma.17G171600 |
| GENE BODY                        | Glyma.17G173300 |
| GENE BODY                        | Glyma.17G173300 |
| GENE BODY                        | Glyma.17G181000 |
| GENE BODY                        | Glyma.17G184300 |
| GENE BODY                        | Glyma.17G184300 |
| GENE BODY(150bp); PROMOTER(50bp) | Glyma.17G184300 |
| PROMOTER                         | Glyma.17G184300 |
| PROMOTER                         | Glyma.17G188600 |
| GENE BODY(107bp); PROMOTER(93bp) | Glyma.17G190200 |
| GENE BODY                        | Glyma.17G191000 |
| 3'UTR                            | Glyma.17G191700 |
| PROMOTER                         | Glyma.17G191800 |
| GENE BODY                        | Glyma.17G199600 |

|                                |                 |
|--------------------------------|-----------------|
| GENE BODY                      | Glyma.17G200200 |
| GENE BODY                      | Glyma.17G201000 |
| GENE BODY                      | Glyma.17G204000 |
| GENE BODY                      | Glyma.17G210100 |
| GENE BODY                      | Glyma.17G210100 |
| PROMOTER                       | Glyma.17G213600 |
| GENE BODY                      | Glyma.17G215800 |
| 3'UTR(60bp); GENE BODY (140bp) | Glyma.17G219600 |
| GENE BODY                      | Glyma.17G220800 |
| 3'UTR                          | Glyma.17G226600 |
| GENE BODY                      | Glyma.17G235400 |
| GENE BODY                      | Glyma.17G244800 |
| GENE BODY                      | Glyma.17G249100 |
| 3'UTR(98bp); GENE BODY (102bp) | Glyma.17G250200 |
| GENE BODY                      | Glyma.17G253700 |
| GENE BODY                      | Glyma.17G255500 |
| GENE BODY                      | Glyma.17G257100 |
| GENE BODY                      | Glyma.18G003800 |
| GENE BODY                      | Glyma.18G004600 |
| GENE BODY                      | Glyma.18G004600 |
| GENE BODY                      | Glyma.18G011200 |
| GENE BODY                      | Glyma.18G011200 |
| PROMOTER                       | Glyma.18G013300 |
| PROMOTER                       | Glyma.18G013300 |
| GENE BODY                      | Glyma.18G016200 |
| GENE BODY                      | Glyma.18G027800 |
| 5' UTR(33bp); GENE BODY(167bp) | Glyma.18G028900 |
| GENE BODY                      | Glyma.18G055700 |
| PROMOTER                       | Glyma.18G060800 |
| GENE BODY                      | Glyma.18G064900 |
| 3'UTR(15bp); GENE BODY(185bp)  | Glyma.18G068800 |
| GENE BODY                      | Glyma.18G093500 |
| GENE BODY                      | Glyma.18G093500 |
| GENE BODY                      | Glyma.18G093600 |
| GENE BODY                      | Glyma.18G107900 |
| PROMOTER                       | Glyma.18G112200 |
| GENE BODY                      | Glyma.18G131200 |
| PROMOTER                       | Glyma.18G146700 |
| GENE BODY                      | Glyma.18G154700 |
| 3'UTR                          | Glyma.18G159100 |
| GENE BODY                      | Glyma.18G166600 |
| PROMOTER                       | Glyma.18G167500 |
| 5' UTR(43bp); GENE BODY(157bp) | Glyma.18G170600 |

|                                   |                 |
|-----------------------------------|-----------------|
| GENE BODY                         | Glyma.18G176400 |
| GENE BODY(69bp); PROMOTER (131bp) | Glyma.18G178600 |
| PROMOTER                          | Glyma.18G186900 |
| GENE BODY                         | Glyma.18G195000 |
| GENE BODY                         | Glyma.18G199800 |
| GENE BODY                         | Glyma.18G209800 |
| GENE BODY                         | Glyma.18G219100 |
| GENE BODY                         | Glyma.18G230300 |
| GENE BODY                         | Glyma.18G237100 |
| GENE BODY                         | Glyma.18G237200 |
| GENE BODY                         | Glyma.18G247300 |
| GENE BODY                         | Glyma.18G251800 |
| GENE BODY                         | Glyma.18G252800 |
| 3'UTR(75bp); GENE BODY (125bp)    | Glyma.18G253400 |
| GENE BODY                         | Glyma.18G280500 |
| GENE BODY                         | Glyma.18G286300 |
| GENE BODY                         | Glyma.18G296100 |
| GENE BODY                         | Glyma.18G297900 |
| GENE BODY                         | Glyma.19G001500 |
| GENE BODY                         | Glyma.19G012300 |
| GENE BODY                         | Glyma.19G012900 |
| GENE BODY                         | Glyma.19G016300 |
| GENE BODY                         | Glyma.19G023400 |
| GENE BODY                         | Glyma.19G028800 |
| GENE BODY                         | Glyma.19G029000 |
| GENE BODY                         | Glyma.19G040200 |
| GENE BODY                         | Glyma.19G040800 |
| GENE BODY                         | Glyma.19G043600 |
| GENE BODY                         | Glyma.19G076400 |
| GENE BODY                         | Glyma.19G077100 |
| 3'UTR(5bp); GENE BODY (195bp)     | Glyma.19G077200 |
| GENE BODY                         | Glyma.19G082800 |
| GENE BODY                         | Glyma.19G086600 |
| GENE BODY                         | Glyma.19G095000 |
| PROMOTER                          | Glyma.19G097300 |
| 3'UTR(44bp); GENE BODY (156bp)    | Glyma.19G116000 |
| GENE BODY                         | Glyma.19G117700 |
| GENE BODY                         | Glyma.19G141800 |
| GENE BODY                         | Glyma.19G149500 |
| 3'UTR(16bp); GENE BODY (184bp)    | Glyma.19G152200 |
| 3'UTR(57bp); GENE BODY (143bp)    | Glyma.19G155900 |
| GENE BODY                         | Glyma.19G170700 |
| GENE BODY                         | Glyma.19G175600 |

|                                |                 |
|--------------------------------|-----------------|
| GENE BODY                      | Glyma.19G175900 |
| GENE BODY                      | Glyma.19G178700 |
| GENE BODY                      | Glyma.19G179300 |
| GENE BODY                      | Glyma.19G180500 |
| PROMOTER                       | Glyma.19G184200 |
| 3'UTR                          | Glyma.19G185300 |
| GENE BODY                      | Glyma.19G187300 |
| PROMOTER                       | Glyma.19G187400 |
| GENE BODY                      | Glyma.19G208300 |
| GENE BODY                      | Glyma.19G213700 |
| 5'UTR(43bp); PROMOTER (157bp)  | Glyma.19G217000 |
| GENE BODY                      | Glyma.19G221200 |
| GENE BODY                      | Glyma.19G239400 |
| GENE BODY                      | Glyma.19G239700 |
| GENE BODY                      | Glyma.19G250600 |
| 3'UTR(39bp); GENE BODY (161bp) | Glyma.19G251400 |
| GENE BODY                      | Glyma.19G256500 |
| GENE BODY                      | Glyma.19G259200 |
| GENE BODY                      | Glyma.20G013500 |
| GENE BODY                      | Glyma.20G017400 |
| GENE BODY                      | Glyma.20G025100 |
| 3'UTR(155bp); GENE BODY (45bp) | Glyma.20G027500 |
| 5' UTR(42bp); GENE BODY(158bp) | Glyma.20G040900 |
| 5' UTR                         | Glyma.20G047800 |
| PROMOTER                       | Glyma.20G047900 |
| GENE BODY                      | Glyma.20G054500 |
| GENE BODY                      | Glyma.20G056500 |
| GENE BODY                      | Glyma.20G060800 |
| GENE BODY                      | Glyma.20G079600 |
| 3'UTR(43bp); GENE BODY (157bp) | Glyma.20G079800 |
| GENE BODY                      | Glyma.20G086700 |
| GENE BODY                      | Glyma.20G107600 |
| GENE BODY                      | Glyma.20G110600 |
| GENE BODY                      | Glyma.20G112200 |
| GENE BODY                      | Glyma.20G116900 |
| PROMOTER                       | Glyma.20G120500 |
| GENE BODY                      | Glyma.20G130800 |
| PROMOTER                       | Glyma.20G131200 |
| GENE BODY                      | Glyma.20G146600 |
| GENE BODY                      | Glyma.20G149100 |
| GENE BODY                      | Glyma.20G149200 |
| GENE BODY                      | Glyma.20G153600 |
| 3'UTR                          | Glyma.20G154300 |

|           |                 |
|-----------|-----------------|
| PROMOTER  | Glyma.20G162200 |
| GENE BODY | Glyma.20G165400 |
| GENE BODY | Glyma.20G166000 |
| GENE BODY | Glyma.20G173200 |
| GENE BODY | Glyma.20G185600 |
| GENE BODY | Glyma.20G185600 |
| GENE BODY | Glyma.20G185800 |
| GENE BODY | Glyma.20G187800 |
| GENE BODY | Glyma.20G189700 |
| GENE BODY | Glyma.20G195700 |
| GENE BODY | Glyma.20G208700 |
| GENE BODY | Glyma.20G216900 |
| GENE BODY | Glyma.20G217700 |
| GENE BODY | Glyma.20G218900 |
| GENE BODY | Glyma.20G233700 |
| GENE BODY | Glyma.20G244700 |
| GENE BODY | Glyma.U010500   |
| PROMOTER  | Glyma.U013900   |
| GENE BODY | Glyma.U032300   |
| GENE BODY | Glyma.U032500   |
| GENE BODY | Glyma.U034000   |
| PROMOTER  | Glyma.U035000   |

---

| <b>GENE ANNOTATION</b>                                              | <b>Methylation Differenc</b> |
|---------------------------------------------------------------------|------------------------------|
| gamma-glutamyl transpeptidase 4                                     | -37.99867021                 |
| hexokinase 2                                                        | -34.41134752                 |
| hexokinase 2                                                        | -51.85185185                 |
| N/A                                                                 | -58.67924528                 |
| N/A                                                                 | -49.48453608                 |
| kinesin like protein for actin based chloroplast movement 1         | -39.47368421                 |
| Alkaline-phosphatase-like family protein                            | -97.05882353                 |
| N/A                                                                 | -41.93245779                 |
| SIN3-like 3                                                         | -41.93245779                 |
| N/A                                                                 | -60.625                      |
| SOUL heme-binding family protein                                    | -88.23529412                 |
| Pentatricopeptide repeat (PPR) superfamily protein                  | -32.60869565                 |
| Squamosa promoter-binding protein-like (SBP domain) transcripti     | -100                         |
| Prolyl oligopeptidase family protein                                | -100                         |
| N/A                                                                 | -100                         |
| Phosphoglycerate mutase family protein                              | -100                         |
| Nucleic acid-binding, OB-fold-like protein                          | -40                          |
| Nucleic acid-binding, OB-fold-like protein                          | -33.20087809                 |
| Nucleic acid-binding, OB-fold-like protein                          | -34.99128616                 |
| ARM repeat superfamily protein                                      | -76.47058824                 |
| Zinc finger (CCCH-type) family protein                              | -34.36363636                 |
| glucose-6-phosphate/phosphate translocator 2                        | -34.26332288                 |
| glucose-6-phosphate/phosphate translocator 2                        | -29.71846847                 |
| TBP-associated factor 15                                            | -40                          |
| receptor like protein 6                                             | -74.07407407                 |
| N/A                                                                 | -81.25                       |
| N/A                                                                 | -91.66666667                 |
| arginase                                                            | -70.1754386                  |
| N/A                                                                 | -80                          |
| N/A                                                                 | -37.48902546                 |
| N/A                                                                 | -52.17391304                 |
| RNA-binding (RRM/RBD/RNP motifs) family protein                     | -52.17391304                 |
| RNA-binding (RRM/RBD/RNP motifs) family protein                     | -37.48902546                 |
| protein binding                                                     | -52.17391304                 |
| protein binding                                                     | -37.48902546                 |
| Histidine kinase-, DNA gyrase B-, and HSP90-like ATPase family prc  | -33.46613546                 |
| RNA polymerase II large subunit                                     | -70.83333333                 |
| calcium-dependent protein kinase 16                                 | -56.52173913                 |
| DNA binding;zinc ion binding;nucleic acid binding;nucleic acid binc | -84.02985075                 |
| N/A                                                                 | -75                          |
| SU(VAR)3-9 homolog 6                                                | -39.47368421                 |

|                                                                  |              |
|------------------------------------------------------------------|--------------|
| RGPR-related                                                     | -47.05882353 |
| alpha/beta-Hydrolases superfamily protein                        | -27.72277228 |
| THUMP domain-containing protein                                  | -30.97345133 |
| RING/FYVE/PHD zinc finger superfamily protein                    | -90.90909091 |
| CVP2 like 1                                                      | -63.63636364 |
| Acyl-CoA N-acyltransferase with RING/FYVE/PHD-type zinc finger p | -56.03492553 |
| somatic embryogenesis receptor-like kinase 1                     | -92.45283019 |
| Tetratricopeptide repeat (TPR)-like superfamily protein          | -91.66666667 |
| ABC transporter 1                                                | -32.11038961 |
| N/A                                                              | -83.33333333 |
| serine acetyltransferase 3;2                                     | -37.39809783 |
| TSL-kinase interacting protein 1                                 | -96.96969697 |
| FAD/NAD(P)-binding oxidoreductase family protein                 | -72.58064516 |
| Pyridoxal phosphate (PLP)-dependent transferases superfamily pr  | -44.70066519 |
| N/A                                                              | -75          |
| Mitochondrial substrate carrier family protein                   | -59.41043084 |
| microtubule-associated proteins 70-2                             | -28.71590153 |
| HEAT repeat-containing protein                                   | -74.72527473 |
| phenylalanyl-tRNA synthetase class IIc family protein            | -79.36507937 |
| Ribosomal protein L12/ ATP-dependent Clp protease adaptor prot   | -100         |
| methionine aminopeptidase 1B                                     | -43.86733417 |
| NAC (No Apical Meristem) domain transcriptional regulator super  | -69.64285714 |
| N/A                                                              | -29.76190476 |
| N/A                                                              | -41.37931034 |
| peroxisomal adenine nucleotide carrier 1                         | -46.03174603 |
| N/A                                                              | -37.33031674 |
| N/A                                                              | -39.52861953 |
| N/A                                                              | -33.34991708 |
| galacturonosyltransferase 6                                      | -60          |
| alpha/beta-Hydrolases superfamily protein                        | -77.6119403  |
| methylcrotonyl-CoA carboxylase alpha chain, mitochondrial / 3-m  | -95.23809524 |
| Tetratricopeptide repeat (TPR)-like superfamily protein          | -36.53846154 |
| basic region/leucine zipper motif 60                             | -32.78688525 |
| N/A                                                              | -37.93103448 |
| Protein of unknown function, DUF593                              | -100         |
| N/A                                                              | -38.8712522  |
| P-loop containing nucleoside triphosphate hydrolases superfamily | -78.57142857 |
| nudix hydrolase homolog 23                                       | -57.5        |
| Protein of unknown function (DUF288)                             | -73.17073171 |
| Cyclin-like family protein                                       | -53.84615385 |
| MAP kinase kinase 6                                              | -38.63636364 |



|                                                                    |              |
|--------------------------------------------------------------------|--------------|
| S-adenosyl-L-methionine-dependent methyltransferases superfamily   | -73.91304348 |
| N/A                                                                | -34.28571429 |
| chaperone protein dnaJ-related                                     | -35.13513514 |
| Tetratricopeptide repeat (TPR)-like superfamily protein            | -70.34632035 |
| Pseudouridine synthase family protein                              | -43.5483871  |
| Golgi-body localisation protein domain ;RNA pol II promoter Fmp2   | -100         |
| indole-3-acetic acid inducible 9                                   | -52.38095238 |
| N/A                                                                | -25.37252056 |
| ribosomal protein S2                                               | -83.09659091 |
| nucleotide binding;protein binding                                 | -73.91304348 |
| Haloacid dehalogenase-like hydrolase (HAD) superfamily protein     | -77.77777778 |
| Xanthine/uracil permease family protein                            | -100         |
| serine/threonine protein phosphatase 2A 55 kDa regulatory subunit  | -27.11864407 |
| Protein phosphatase 2A regulatory B subunit family protein         | -61.40350877 |
| Ethylene insensitive 3 family protein                              | -63.15789474 |
| auxin response factor 6                                            | -100         |
| hydroxyproline-rich glycoprotein family protein                    | -91.30434783 |
| ENHANCED DOWNY MILDEW 2                                            | -39.38215103 |
| multidrug resistance-associated protein 3                          | -76.47058824 |
| DNAJ heat shock N-terminal domain-containing protein               | -67.14975845 |
| Nucleotide-sugar transporter family protein                        | -25.92935479 |
| SEC7-like guanine nucleotide exchange family protein               | -76.92307692 |
| RAS associated with diabetes protein 51C                           | -100         |
| high mobility group                                                | -58.72909699 |
| Protein phosphatase 2C family protein                              | -29.47368421 |
| regulatory particle AAA-ATPase 2A                                  | -47.22222222 |
| mRNA capping enzyme family protein                                 | -50.90909091 |
| defective in exine formation protein (DEX1)                        | -69.04761905 |
| RHOMBOID-like 1                                                    | -50          |
| E3 Ubiquitin ligase family protein                                 | -63.1372549  |
| Chloroplast Ycf2;ATPase, AAA type, core                            | -34.97432606 |
| hAT dimerisation domain-containing protein                         | -94.28571429 |
| alpha/beta-Hydrolases superfamily protein                          | -70.37037037 |
| disproportionating enzyme 2                                        | -83.72093023 |
| TGACG motif-binding factor 6                                       | -72.81553398 |
| P-loop containing nucleoside triphosphate hydrolases superfamily   | -63.88888889 |
| N/A                                                                | -61.53846154 |
| curculin-like (mannose-binding) lectin family protein / PAN domain | -90          |
| N/A                                                                | -31.42857143 |
| spindle pole body component 98                                     | -75.30864198 |
| FUS3-complementing gene 1                                          | -30.14705882 |
| FASCICLIN-like arabinogalactan-protein 11                          | -50.67126966 |

|                                                                      |              |
|----------------------------------------------------------------------|--------------|
| Pyruvate kinase family protein                                       | -90          |
| RHOMBOID-like protein 15                                             | -27.77991207 |
| Chaperone DnaJ-domain superfamily protein                            | -76.92307692 |
| N/A                                                                  | -29.41176471 |
| N/A                                                                  | -27.11111111 |
| Protein phosphatase 2C family protein                                | -29.41176471 |
| Protein phosphatase 2C family protein                                | -27.11111111 |
| regulatory particle triple-A ATPase 5A                               | -47.22772277 |
| RNA polymerase II transcription mediators                            | -68          |
| Glycosyl hydrolase superfamily protein                               | -70.83333333 |
| Ankyrin repeat family protein                                        | -36.36363636 |
| Sec14p-like phosphatidylinositol transfer family protein             | -73.91304348 |
| Galactose oxidase/kelch repeat superfamily protein                   | -66          |
| Protein kinase superfamily protein                                   | -69.13580247 |
| glycosyl hydrolase 9B7                                               | -66          |
| Plant protein of unknown function (DUF869)                           | -48.8372093  |
| xylem bark cysteine peptidase 3                                      | -39.47368421 |
| N/A                                                                  | -64.28571429 |
| RING/U-box superfamily protein                                       | -55          |
| RING/U-box superfamily protein                                       | -81.81818182 |
| homology to ABI1                                                     | -100         |
| tyrosyl-DNA phosphodiesterase-related                                | -68.33333333 |
| N/A                                                                  | -100         |
| Putative serine esterase family protein                              | -98          |
| CBL-interacting protein kinase 8                                     | -55          |
| Rho GTPase activation protein (RhoGAP) with PH domain                | -60          |
| binding                                                              | -72.22222222 |
| N/A                                                                  | -91.66666667 |
| zinc induced facilitator-like 1                                      | -27.21893491 |
| nuclear matrix protein-related                                       | -56.71641791 |
| Cytidine/deoxycytidylate deaminase family protein                    | -100         |
| cyclic nucleotide-gated channel 17                                   | -71.16382506 |
| DDT domain superfamily                                               | -74.64788732 |
| Homeodomain-like superfamily protein                                 | -90          |
| Protein kinase superfamily protein                                   | -37.5        |
| alpha/beta-Hydrolases superfamily protein                            | -100         |
| nuclear protein X1                                                   | -43.33333333 |
| topoisomerase 3alpha                                                 | -51.72413793 |
| histone methyltransferases(H3-K4 specific);histone methyltransferase | -53.74396135 |
| putative protein kinase 1                                            | -45.05882353 |
| Transducin/WD40 repeat-like superfamily protein                      | -74.28571429 |
| sirohochlorin ferrochelatase B                                       | -58          |
| Tetratricopeptide repeat (TPR)-like superfamily protein              | -93.33333333 |

|                                                                   |              |
|-------------------------------------------------------------------|--------------|
| Transcription factor TFIIIE, alpha subunit                        | -95.65217391 |
| glycine-rich RNA-binding protein 3                                | -100         |
| H(+)-ATPase 11                                                    | -68.18181818 |
| DDT domain superfamily                                            | -42.80661867 |
| ARM repeat superfamily protein                                    | -43.47826087 |
| ARM repeat superfamily protein                                    | -26.72998643 |
| RNA-dependent RNA polymerase 2                                    | -91.30434783 |
| histone deacetylase 6                                             | -100         |
| ubiquitin-associated (UBA)/TS-N domain-containing protein / octic | -94.11764706 |
| AAA-type ATPase family protein                                    | -73.91304348 |
| MBOAT (membrane bound O-acyl transferase) family protein          | -34          |
| O-fucosyltransferase family protein                               | -36.97351828 |
| hydroxyproline-rich glycoprotein family protein                   | -31.41025641 |
| Histone H3 K4-specific methyltransferase SET7/9 family protein    | -28.38333107 |
| N/A                                                               | -91.42857143 |
| Tetratricopeptide repeat (TPR)-like superfamily protein           | -59.09090909 |
| AMP-dependent synthetase and ligase family protein                | -93.33333333 |
| AMP-dependent synthetase and ligase family protein                | -93.33333333 |
| histidine acid phosphatase family protein                         | -26.5625     |
| histidine acid phosphatase family protein                         | -100         |
| N/A                                                               | -27.65422859 |
| Tubulin/FtsZ family protein                                       | -92.85714286 |
| Ribosomal L32p protein family                                     | -94.44444444 |
| pumilio 7                                                         | -68.75       |
| P-loop containing nucleoside triphosphate hydrolases superfamily  | -91.66666667 |
| IAP-like protein 1                                                | -47.91666667 |
| Tic22-like family protein                                         | -42.5        |
| aspartate kinase-homoserine dehydrogenase ii                      | -71.64179104 |
| 5'-3' exonuclease family protein                                  | -100         |
| RNA-binding (RRM/RBD/RNP motifs) family protein                   | -57.8125     |
| N/A                                                               | -28.93081761 |
| essential meiotic endonuclease 1B                                 | -44.18604651 |
| N/A                                                               | -42.9280397  |
| signal recognition particle-related / SRP-related                 | -46.08433735 |
| P-loop nucleoside triphosphate hydrolases superfamily protein wi  | -100         |
| RNA helicase, ATP-dependent, SK12/DOB1 protein                    | -78.125      |
| N/A                                                               | -74.19354839 |
| ARM repeat superfamily protein                                    | -100         |
| ARM repeat superfamily protein                                    | -44          |
| N/A                                                               | -75          |
| Calcium-binding EF hand family protein                            | -75          |
| N/A                                                               | -100         |
| RNA-binding protein 1                                             | -51.16648993 |

|                                                                   |              |
|-------------------------------------------------------------------|--------------|
| RNA-binding KH domain-containing protein                          | -29.57746479 |
| RNA-binding KH domain-containing protein                          | -36.95652174 |
| Golgi-body localisation protein domain ;RNA pol II promoter Fmp2  | -100         |
| Tetratricopeptide repeat (TPR)-like superfamily protein           | -66.07142857 |
| MAPK/ERK kinase kinase 1                                          | -36.36363636 |
| YbaK/aminoacyl-tRNA synthetase-associated domain                  | -70.96774194 |
| Chaperone DnaJ-domain superfamily protein                         | -40.625      |
| global transcription factor group A2                              | -78.94736842 |
| vacuolar protein sorting 45                                       | -66.66666667 |
| plastid transcriptionally active7                                 | -81.81818182 |
| nascent polypeptide-associated complex subunit alpha-like protein | -29.54545455 |
| disproportionating enzyme                                         | -51.94805195 |
| like COV 2                                                        | -39.28571429 |
| Nucleotidyltransferase family protein                             | -25.15873016 |
| ferrochelatase 2                                                  | -73.01587302 |
| transducin family protein / WD-40 repeat family protein           | -100         |
| glucan synthase-like 8                                            | -100         |
| glucan synthase-like 8                                            | -31.66666667 |
| N/A                                                               | -31.66666667 |
| Protein of unknown function (DUF962)                              | -40          |
| Protein of unknown function (DUF962)                              | -34.87394958 |
| SNF2 domain-containing protein / helicase domain-containing pro   | -67.5        |
| N/A                                                               | -100         |
| ATPase E1-E2 type family protein / haloacid dehalogenase-like hyc | -25.58139535 |
| homeodomain GLABROUS 2                                            | -91.30434783 |
| prenylated RAB acceptor 1.B4                                      | -57.8125     |
| Transducin/WD40 repeat-like superfamily protein                   | -57.8125     |
| Stabilizer of iron transporter SufD / Polynucleotidyl transferase | -74.11764706 |
| Protein of unknown function (DUF803)                              | -48.10400867 |
| Nucleotide/sugar transporter family protein                       | -45.45454545 |
| signal recognition particle receptor alpha subunit family protein | -72.30769231 |
| cyclic nucleotide-gated channel 17                                | -100         |
| DNAJ heat shock family protein                                    | -39.13043478 |
| N/A                                                               | -48.53603604 |
| Ankyrin repeat family protein                                     | -70.58823529 |
| cytochrome P450, family 72, subfamily A, polypeptide 15           | -66.66666667 |
| phytosylfokine-alpha receptor 2                                   | -66.66666667 |
| ribosomal protein L6 family protein                               | -45          |
| cytochrome c oxidase 17                                           | -100         |
| Transducin/WD40 repeat-like superfamily protein                   | -96.15384615 |
| ARF-GAP domain 5                                                  | -95.12195122 |
| Disease resistance protein (TIR-NBS-LRR class) family             | -38.31831832 |
| Disease resistance protein (TIR-NBS-LRR class) family             | -30.53626543 |

|                                                                 |              |
|-----------------------------------------------------------------|--------------|
| Disease resistance protein (TIR-NBS-LRR class) family           | -50.94339623 |
| Disease resistance protein (TIR-NBS-LRR class) family           | -38.7804878  |
| Disease resistance protein (TIR-NBS-LRR class) family           | -34.32835821 |
| BED zinc finger ;hAT family dimerisation domain                 | -64.46808511 |
| disease resistance protein (TIR-NBS-LRR class), putative        | -41.66666667 |
| Tetratricopeptide repeat (TPR)-like superfamily protein         | -74.41860465 |
| ortholog of human splicing factor SC35                          | -74.41860465 |
| Translation initiation factor SUI1 family protein               | -33.79228954 |
| trehalose-phosphatase/synthase 7                                | -70.90909091 |
| Peptidase family M48 family protein                             | -90.90909091 |
| Core-2/I-branching beta-1,6-N-acetylglucosaminyltransferase fam | -33.02139037 |
| N/A                                                             | -100         |
| nuclear factor Y, subunit C11                                   | -54.05405405 |
| NB-ARC domain-containing disease resistance protein             | -42.85714286 |
| exocyst complex component 84B                                   | -50          |
| Phox-associated domain;Phox-like;Sorting nexin, C-terminal      | -56.21840243 |
| translocon at the inner envelope membrane of chloroplasts 20    | -84.84848485 |
| N/A                                                             | -57.47303544 |
| Metallo-hydrolase/oxidoreductase superfamily protein            | -100         |
| cation exchanger 5                                              | -100         |
| CemA-like proton extrusion protein-related                      | -28.408713   |
| Signal recognition particle, SRP54 subunit protein              | -43.14345992 |
| Ubiquitin system component Cue protein                          | -52.27272727 |
| CASC3/Barentsz eIF4AIII binding                                 | -43.75       |
| CCAAT-binding factor                                            | -68          |
| pectin methylesterase 3                                         | -54.58669355 |
| N/A                                                             | -64.17910448 |
| cytochrome P450, family 86, subfamily A, polypeptide 8          | -67.5        |
| Major facilitator superfamily protein                           | -55.51948052 |
| RNAhelicase-like 8                                              | -71.96969697 |
| MUTS homolog 7                                                  | -82.60869565 |
| Plant protein of unknown function (DUF639)                      | -86.66666667 |
| ATP-binding cassette A2                                         | -38.89659958 |
| Surfeit locus 1 cytochrome c oxidase biogenesis protein         | -92.30769231 |
| basic pentacysteine1                                            | -92.30769231 |
| Vacuolar sorting protein 39                                     | -34.13105413 |
| N/A                                                             | -77.50206782 |
| N/A                                                             | -95.45454545 |
| N/A                                                             | -100         |
| N/A                                                             | -67.64705882 |
| Tautomerase/MIF superfamily protein                             | -55.85516179 |
| ARM repeat superfamily protein                                  | -67.34693878 |
| RING-finger protein for embryogenesis                           | -29.58579882 |

|                                                                  |              |
|------------------------------------------------------------------|--------------|
| DYNAMIN-like 1C                                                  | -67.21311475 |
| Pentatricopeptide repeat (PPR-like) superfamily protein          | -65          |
| Glutamyl-tRNA reductase family protein                           | -70.96774194 |
| Protein of unknown function (DUF616)                             | -100         |
| IQ-domain 9                                                      | -70.45454545 |
| N/A                                                              | -39.34108527 |
| Thioesterase/thiol ester dehydrase-isomerase superfamily protein | -97.2972973  |
| Pentatricopeptide repeat (PPR) superfamily protein               | -100         |
| calmodulin-binding protein                                       | -70          |
| N/A                                                              | -60.17316017 |
| RING/U-box superfamily protein                                   | -50.67330211 |
| N/A                                                              | -65.71428571 |
| Glycosyl hydrolase superfamily protein                           | -41.66666667 |
| tobamovirus multiplication 1                                     | -100         |
| ZCW7                                                             | -38.88719357 |
| DDT domain-containing protein                                    | -30.83333333 |
| Myosin heavy chain-related protein                               | -62.15447154 |
| serine racemase                                                  | -100         |
| RNA helicase, ATP-dependent, SK12/DOB1 protein                   | -46.53465347 |
| phosphorylethanolamine cytidyltransferase 1                      | -93.02325581 |
| isoamylase 1                                                     | -72.22222222 |
| CRS1 / YhbY (CRM) domain-containing protein                      | -83.33333333 |
| CRS1 / YhbY (CRM) domain-containing protein                      | -36.99065792 |
| associated molecule with the SH3 domain of STAM 1                | -100         |
| Pyridoxal phosphate (PLP)-dependent transferases superfamily pr  | -34.28571429 |
| AGAMOUS-like 44                                                  | -100         |
| Protein phosphatase 2C family protein                            | -100         |
| arginine/serine-rich zinc knuckle-containing protein 33          | -55.453149   |
| RNA-binding (RRM/RBD/RNP motifs) family protein with retroviru:  | -49.29577465 |
| O-acetyltransferase family protein                               | -35.13513514 |
| RECQ helicase I1                                                 | -47.54098361 |
| ZIP metal ion transporter family                                 | -100         |
| ornithine-delta-aminotransferase                                 | -96.96969697 |
| Leucine-rich repeat protein kinase family protein                | -80          |
| G10 family protein                                               | -85.71428571 |
| protein binding                                                  | -40          |
| LETM1-like protein                                               | -90          |
| N/A                                                              | -100         |
| Rad21/Rec8-like family protein                                   | -71.76470588 |
| Ribosomal protein S5/Elongation factor G/III/V family protein    | -100         |
| Trypsin family protein                                           | -65.67164179 |
| N/A                                                              | -53.57142857 |
| Metallo-hydrolase/oxidoreductase superfamily protein             | -100         |

|                                                                    |              |
|--------------------------------------------------------------------|--------------|
| LETM1-like protein                                                 | -100         |
| mRNA capping enzyme family protein                                 | -100         |
| O-fucosyltransferase family protein                                | -28.57142857 |
| EAP30/Vps36 family protein                                         | -52.44122966 |
| Pentatricopeptide repeat (PPR) superfamily protein                 | -46.15384615 |
| Pentatricopeptide repeat (PPR) superfamily protein                 | -31.76470588 |
| Pentatricopeptide repeat (PPR) superfamily protein                 | -28.08988764 |
| Pentatricopeptide repeat (PPR) superfamily protein                 | -58.71559633 |
| Pentatricopeptide repeat (PPR) superfamily protein                 | -48.88888889 |
| Topoisomerase II-associated protein PAT1                           | -44.44444444 |
| FTSH protease 12                                                   | -40.74074074 |
| P-loop containing nucleoside triphosphate hydrolases superfamily   | -55.81395349 |
| P-loop containing nucleoside triphosphate hydrolases superfamily   | -34.48275862 |
| Phosphoinositide phosphatase family protein                        | -100         |
| Tetratricopeptide repeat (TPR)-like superfamily protein            | -30          |
| calmodulin-binding protein-related                                 | -27.53623188 |
| Malectin/receptor-like protein kinase family protein               | -27.27272727 |
| Protein phosphatase 2C family protein                              | -63.88888889 |
| NB-ARC domain-containing disease resistance protein                | -63.88888889 |
| Concanavalin A-like lectin protein kinase family protein           | -43.5483871  |
| Concanavalin A-like lectin protein kinase family protein           | -43.75       |
| Concanavalin A-like lectin protein kinase family protein           | -43.90243902 |
| N/A                                                                | -28.07268008 |
| N/A                                                                | -25.79206701 |
| Kinase interacting (KIP1-like) family protein                      | -26.08695652 |
| cyclin-relatedMETHYLATED_REGION_CpG_HYPO                           | -28.94736842 |
| Protein of Unknown Function (DUF239)                               | -38.83495146 |
| open reading frame 204                                             | -31.59003831 |
| beta-1,2-xylosyltransferase                                        | -66.64098613 |
| ENTH/VHS family protein                                            | -41.66666667 |
| Signal transduction histidine kinase, hybrid-type, ethylene sensor | -84.12698413 |
| indigoidine synthase A family protein                              | -100         |
| pentatricopeptide (PPR) repeat-containing protein                  | -100         |
| Sec14p-like phosphatidylinositol transfer family protein           | -93.33333333 |
| Transducin/WD40 repeat-like superfamily protein                    | -80          |
| galacturonosyltransferase 4                                        | -73.33333333 |
| Homeobox-leucine zipper family protein / lipid-binding START don   | -70.73170732 |
| Calcium-dependent ARF-type GTPase activating protein family        | -47.72727273 |
| KRR1 family protein                                                | -41.93548387 |
| dicer-like 2                                                       | -100         |
| FAD-binding Berberine family protein                               | -30.27108434 |
| NAD(P)-binding Rossmann-fold superfamily protein                   | -41.26984127 |
| NAD(P)-binding Rossmann-fold superfamily protein                   | -96.66666667 |

|                                                                    |              |
|--------------------------------------------------------------------|--------------|
| N/A                                                                | -30.43478261 |
| Galactose oxidase/kelch repeat superfamily protein                 | -84.3373494  |
| pumilio 5                                                          | -100         |
| DEAD/DEAH box RNA helicase family protein                          | -94.73684211 |
| protein kinase family protein / C-type lectin domain-containing pr | -46.76958262 |
| N/A                                                                | -60.48076923 |
| rRNA processing protein-related                                    | -32.2290032  |
| DNA GYRASE A                                                       | -78.94736842 |
| zinc finger WD40 repeat protein 1                                  | -92.30769231 |
| hydroxymethylglutaryl-CoA synthase / HMG-CoA synthase / 3-hyd      | -68.18181818 |
| Dihydroxyacetone kinase                                            | -69.23076923 |
| embryo sac development arrest 7                                    | -36.66666667 |
| photosystem II reaction center protein M                           | -29.22033898 |
| Fibronectin type III domain-containing protein                     | -85.71428571 |
| N/A                                                                | -73.9088729  |
| Tesmin/TSO1-like CXC domain-containing protein                     | -100         |
| MSCS-like 2                                                        | -40          |
| Glycosyl hydrolase family protein                                  | -38.83784606 |
| SAUR-like auxin-responsive protein family                          | -76.47058824 |
| SAUR-like auxin-responsive protein family                          | -76.47058824 |
| Uncharacterized protein                                            | -44.11206078 |
| N/A                                                                | -43.40909091 |
| DNA binding;ATP binding;nucleic acid binding;binding;helicases;A1  | -55.55555556 |
| Pentatricopeptide repeat (PPR-like) superfamily protein            | -76.69902913 |
| DNA-directed RNA polymerases                                       | -69.6969697  |
| zinc finger protein 1                                              | -60          |
| SKP1-like 21                                                       | -70.90909091 |
| Protein of unknown function (DUF3741)                              | -81.25       |
| RNA-binding KH domain-containing protein                           | -100         |
| SCAR homolog 2                                                     | -52.27272727 |
| Polyketide cyclase/dehydrase and lipid transport superfamily prot  | -37.83783784 |
| Zinc finger C-x8-C-x5-C-x3-H type family protein                   | -90.90909091 |
| transducin family protein / WD-40 repeat family protein            | -83.33333333 |
| N/A                                                                | -28.94557823 |
| Galactose oxidase/kelch repeat superfamily protein                 | -67.56756757 |
| Beige/BEACH domain ;WD domain, G-beta repeat protein               | -60.86956522 |
| Mitochondrial transcription termination factor family protein      | -35.02739467 |
| N/A                                                                | -95          |
| kinesin 1                                                          | -32.53333333 |
| N/A                                                                | -33.51032448 |
| N/A                                                                | -34.53199365 |
| Arginyl-tRNA synthetase, class Ic                                  | -57.20238095 |
| Arginyl-tRNA synthetase, class Ic                                  | -92.72727273 |



|                                                                     |              |
|---------------------------------------------------------------------|--------------|
| Protein kinase family protein with ARM repeat domain                | -57.33333333 |
| ubiquitin-specific protease 13                                      | -100         |
| Protein of unknown function (DUF3411)                               | -40.1744186  |
| Polynucleotidyl transferase, ribonuclease H-like superfamily prote  | -49.15254237 |
| mitochondrially targeted single-stranded DNA binding protein        | -38.28551913 |
| RING/U-box superfamily protein                                      | -100         |
| N/A                                                                 | -100         |
| RNA-binding (RRM/RBD/RNP motifs) family protein                     | -48.57142857 |
| RNA binding (RRM/RBD/RNP motifs) family protein                     | -95.23809524 |
| Uncharacterised protein family (UPF0497)                            | -38.70967742 |
| Protein of unknown function (DUF810)                                | -25.75138009 |
| N/A                                                                 | -100         |
| nudix hydrolase homolog 26                                          | -36.43697019 |
| Transmembrane amino acid transporter family protein                 | -100         |
| Sec1/munc18-like (SM) proteins superfamily                          | -76.47058824 |
| Zim17-type zinc finger protein                                      | -47.02380952 |
| Zinc finger (C2H2 type) family protein / transcription factor jumon | -55          |
| N/A                                                                 | -37.5        |
| DEAD box RNA helicase (PRH75)                                       | -39.02439024 |
| Protein of unknown function (DUF630 and DUF632)                     | -26.2987013  |
| tonneau 1b (TON1b)                                                  | -98.61111111 |
| target of rapamycin                                                 | -37.04274162 |
| N/A                                                                 | -100         |
| pleckstrin homology (PH) domain-containing protein                  | -81.81818182 |
| N/A                                                                 | -44.44444444 |
| P-loop containing nucleoside triphosphate hydrolases superfamily    | -81.31868132 |
| Pentatricopeptide repeat (PPR) superfamily protein                  | -100         |
| ACT-like protein tyrosine kinase family protein                     | -34.64912281 |
| Ubiquitin-like superfamily protein                                  | -40          |
| N/A                                                                 | -40          |
| Plant protein of unknown function (DUF827)                          | -47.27272727 |
| RING/FYVE/PHD zinc finger superfamily protein                       | -100         |
| ATPase, F0/V0 complex, subunit C protein                            | -100         |
| Ribosomal RNA processing Brix domain protein                        | -100         |
| tRNAisopentenyltransferase 2                                        | -72.5        |
| Ribosomal protein L24e family protein                               | -41.77927928 |
| vacuolar protein sorting 41                                         | -31.48148148 |
| ribosomal protein L9                                                | -100         |
| ABC transporter family protein                                      | -90.90909091 |
| BTB/POZ/MATH-domains containing protein                             | -100         |
| Yippee family putative zinc-binding protein                         | -100         |
| N/A                                                                 | -100         |
| Galactose oxidase/kelch repeat superfamily protein                  | -100         |

|                                                                  |              |
|------------------------------------------------------------------|--------------|
| AGC (cAMP-dependent, cGMP-dependent and protein kinase C) ki     | -72.22222222 |
| AGC (cAMP-dependent, cGMP-dependent and protein kinase C) ki     | -53.84615385 |
| mitogen-activated protein kinase kinase kinase 7                 | -90.47619048 |
| Basic-leucine zipper (bZIP) transcription factor family protein  | -100         |
| RNA binding                                                      | -37.5        |
| RNA binding                                                      | -42.3661509  |
| N/A                                                              | -90          |
| N/A                                                              | -90          |
| DHBP synthase RibB-like alpha/beta domain                        | -100         |
| NOT2 / NOT3 / NOT5 family                                        | -43.83561644 |
| Pheophorbide a oxygenase family protein with Rieske [2Fe-2S] doi | -42.64705882 |
| PHD finger family protein                                        | -31.22015915 |
| Protein kinase superfamily protein                               | -100         |
| kinesin 3                                                        | -51.84275184 |
| Protein kinase superfamily protein                               | -25.36509176 |
| S-locus lectin protein kinase family protein                     | -83.33333333 |
| Leucine-rich repeat transmembrane protein kinase                 | -61.9047619  |
| homogentisate 1,2-dioxygenase                                    | -100         |
| shaggy-like protein kinase 41                                    | -91.66666667 |
| ARM repeat superfamily protein                                   | -100         |
| DNA/RNA helicase protein                                         | -100         |
| S-locus lectin protein kinase family protein                     | -45          |
| zinc ion binding                                                 | -36.73245614 |
| N/A                                                              | -100         |
| RING 1A                                                          | -59.36853002 |
| global transcription factor group E4                             | -90.90909091 |
| Tetratricopeptide repeat (TPR)-like superfamily protein          | -60.86956522 |
| myosin 2                                                         | -65.43209877 |
| Yippee family putative zinc-binding protein                      | -72.89719626 |
| N/A                                                              | -74.50980392 |
| RAB GTPase homolog A1B                                           | -63.15789474 |
| eukaryotic translation initiation factor SUI1 family protein     | -59.64285714 |
| homolog of yeast ADA2 2A                                         | -62.5        |
| Endomembrane protein 70 protein family                           | -54.05405405 |
| N/A                                                              | -28.19875776 |
| N/A                                                              | -49.33333333 |
| high mobility group B2                                           | -28.19875776 |
| high mobility group B2                                           | -49.33333333 |
| Target of Myb protein 1                                          | -96.15384615 |
| DNAJ heat shock N-terminal domain-containing protein             | -51.28205128 |
| Auxin efflux carrier family protein                              | -38.46153846 |
| N/A                                                              | -29.18192918 |
| N/A                                                              | -27.817005   |

|                                                                |              |
|----------------------------------------------------------------|--------------|
| N/A                                                            | -42.62295082 |
| Malectin/receptor-like protein kinase family protein           | -27.00743049 |
| casein lytic proteinase B3                                     | -64.86486486 |
| EID1-like 2                                                    | -67.85714286 |
| NAC domain containing protein 100                              | -35.93073593 |
| cullin 3                                                       | -100         |
| hydroxyproline-rich glycoprotein family protein                | -59.26370548 |
| protein kinase 2A                                              | -62.85714286 |
| Disease resistance protein (TIR-NBS-LRR class) family          | -28.57142857 |
| 3'-5' exonuclease domain-containing protein                    | -75          |
| MAPK/ERK kinase kinase 1                                       | -76.78571429 |
| HAD-superfamily hydrolase, subfamily IG, 5'-nucleotidase       | -100         |
| multidrug resistance-associated protein 5                      | -100         |
| myosin 2                                                       | -100         |
| CLIP-associated protein                                        | -98.14814815 |
| HSP20-like chaperones superfamily protein                      | -73.45238095 |
| heat shock cognate protein 70-1                                | -29.2334248  |
| PIF1 helicase                                                  | -29.2334248  |
| Protein kinase superfamily protein                             | -76.66666667 |
| BED zinc finger ;hAT family dimerisation domain                | -91.66666667 |
| Protein of unknown function (DUF1162)                          | -76.15384615 |
| cysteine-rich RLK (RECEPTOR-like protein kinase) 10            | -70          |
| Peptidase S24/S26A/S26B/S26C family protein                    | -50.02462448 |
| Disease resistance protein (TIR-NBS-LRR class) family          | -68.08510638 |
| Phosphatidylinositol-4-phosphate 5-kinase family protein       | -100         |
| nuclear RNA polymerase D1B                                     | -57.57575758 |
| uridine 5'-monophosphate synthase / UMP synthase (PYRE-F) (UI  | -54.76190476 |
| CBS domain-containing protein with a domain of unknown functio | -100         |
| auxin response factor 8                                        | -48.17391304 |
| Integrin-linked protein kinase family                          | -32.64051522 |
| N/A                                                            | -27.63918252 |
| glutamate receptor 2.7                                         | -51.35746606 |
| Homeodomain-like transcriptional regulator                     | -28.62318841 |
| callose synthase 5                                             | -74.46808511 |
| STRUBBELIG-receptor family 3                                   | -88.37209302 |
| pyrophosphorylase 6                                            | -100         |
| RING/U-box superfamily protein                                 | -89.76190476 |
| MATE efflux family protein                                     | -28.47144457 |
| Nucleotidyltransferase family protein                          | -65.85365854 |
| Leucine-rich repeat (LRR) family protein                       | -63.07692308 |
| myosin 2                                                       | -52.56099832 |
| BURP domain-containing protein                                 | -30.27912621 |
| WRKY DNA-binding protein 69                                    | -90          |

|                                                            |              |
|------------------------------------------------------------|--------------|
| Protein kinase superfamily protein                         | -100         |
| photosynthetic electron transfer C                         | -76.05633803 |
| Receptor-like protein kinase-related family protein        | -49.93257417 |
| N/A                                                        | -91.17647059 |
| 4-hydroxy-3-methylbut-2-enyl diphosphate synthase          | -77.22222222 |
| ETHYLENE-INSENSITIVE3-like 3                               | -53.03571429 |
| ENTH/VHS family protein                                    | -68.125      |
| N/A                                                        | -100         |
| microtubule-associated proteins 65-1                       | -43.24561404 |
| polymerase gamma 2                                         | -34.61538462 |
| F-box protein 2                                            | -80          |
| Structural maintenance of chromosomes (SMC) family protein | -95.45454545 |
| Regulator of chromosome condensation (RCC1) family protein | -72.5        |
| Pentatricopeptide repeat (PPR-like) superfamily protein    | -87.5        |
| sec7 domain-containing protein                             | -71.23287671 |
| THO complex, subunit 5                                     | -96          |
| N/A                                                        | -46.529723   |
| Transketolase family protein                               | -75          |
| nucleotide binding protein 35                              | -34.11764706 |
| Small nuclear ribonucleoprotein family protein             | -38.25161887 |
| G protein alpha subunit 1                                  | -100         |
| Chalcone-flavanone isomerase family protein                | -37.14285714 |
| ACT-like protein tyrosine kinase family protein            | -55.78378378 |
| N/A                                                        | -43.24324324 |
| N/A                                                        | -43.36170213 |
| TRS120                                                     | -100         |
| N/A                                                        | -63.89578164 |
| SET domain group 29                                        | -63.89578164 |
| alcohol dehydrogenase 1                                    | -62.73465957 |
| RING/U-box superfamily protein                             | -52.08333333 |
| ubiquitin-specific protease 26                             | -36.80555556 |
| ubiquitin-specific protease 26                             | -100         |
| DNA topoisomerase, type IA, core                           | -34.16208791 |
| Tetratricopeptide repeat (TPR)-like superfamily protein    | -100         |
| Tetratricopeptide repeat (TPR)-like superfamily protein    | -40.06159015 |
| Tetratricopeptide repeat (TPR)-like superfamily protein    | -36.02150538 |
| Tetratricopeptide repeat (TPR)-like superfamily protein    | -76.92307692 |
| N/A                                                        | -33.68159204 |
| NADH-dependent glutamate synthase 1                        | -35.18156121 |
| O-fucosyltransferase family protein                        | -29.13806255 |
| O-fucosyltransferase family protein                        | -37.96061723 |
| Target SNARE coiled-coil domain protein                    | -100         |
| N/A                                                        | -54.88721805 |

|                                                                   |              |
|-------------------------------------------------------------------|--------------|
| TRAF-type zinc finger-related                                     | -75          |
| Transketolase family protein                                      | -47.54221388 |
| RNAse E/G-like                                                    | -83.63636364 |
| B-box type zinc finger protein with CCT domain                    | -27.94117647 |
| phosphate transporter 4;3                                         | -50.79365079 |
| Protein of unknown function (DUF567)                              | -52.13600697 |
| Basic-leucine zipper (bZIP) transcription factor family protein   | -55.83982202 |
| LYR family of Fe/S cluster biogenesis protein                     | -44.8630137  |
| chitinase A                                                       | -30.15151515 |
| Poly (ADP-ribose) glycohydrolase (PARG)                           | -30.80882353 |
| beta galactosidase 1                                              | -100         |
| casein kinase 1-like protein 2                                    | -38.63636364 |
| ACT domain-containing protein                                     | -62.98003072 |
| Tetratricopeptide repeat (TPR)-like superfamily protein           | -30.55555556 |
| pyruvate decarboxylase-2                                          | -30.55555556 |
| dynamamin-related protein 3A                                      | -100         |
| glucan synthase-like 1                                            | -75.71428571 |
| Ankyrin repeat family protein                                     | -40.29888551 |
| chromatin remodeling factor17                                     | -35.06979063 |
| beta-amylase 3                                                    | -74.19354839 |
| N/A                                                               | -37.81609195 |
| Thymidine kinase                                                  | -55.31400966 |
| Galactose oxidase/kelch repeat superfamily protein                | -100         |
| PSAJ                                                              | -95.85492228 |
| PSAJ                                                              | -78.37465565 |
| homolog of yeast sucrose nonfermenting 4                          | -100         |
| nuclear factor Y, subunit A5                                      | -30.82251082 |
| XS domain-containing protein / XS zinc finger domain-containing p | -34.06593407 |
| XS domain-containing protein / XS zinc finger domain-containing p | -34.06593407 |
| P-loop containing nucleoside triphosphate hydrolases superfamily  | -27.53623188 |
| Riboflavin synthase-like superfamily protein                      | -38.23529412 |
| Riboflavin synthase-like superfamily protein                      | -31.81818182 |
| Riboflavin synthase-like superfamily protein                      | -25.97402597 |
| binding;RNA binding                                               | -54.16666667 |
| Pentatricopeptide repeat (PPR) superfamily protein                | -30.30165913 |
| Pentatricopeptide repeat (PPR) superfamily protein                | -35.71428571 |
| Pentatricopeptide repeat (PPR) superfamily protein                | -28.57142857 |
| Major facilitator superfamily protein                             | -38.82896764 |
| XH/XS domain-containing protein                                   | -41.07142857 |
| Ribosomal protein L13 family protein                              | -94.44444444 |
| guanyl-nucleotide exchange factors;GTPase binding;GTP binding     | -100         |
| guanyl-nucleotide exchange factors;GTPase binding;GTP binding     | -54.13533835 |
| cycling DOF factor 1                                              | -50          |

|                                                                     |              |
|---------------------------------------------------------------------|--------------|
| Disease resistance protein (TIR-NBS-LRR class) family               | -32.84406141 |
| nuclear RNA polymerase D1B                                          | -96.77419355 |
| N/A                                                                 | -40          |
| N/A                                                                 | -48.53560931 |
| cytochrome P450, family 72, subfamily A, polypeptide 15             | -52.11267606 |
| cytochrome P450, family 72, subfamily A, polypeptide 15             | -48.24561404 |
| cytochrome P450, family 72, subfamily A, polypeptide 15             | -34.42622951 |
| photosystem II reaction center protein K precursor                  | -46.38709981 |
| Ribosomal protein L1p/L10e family                                   | -31.62393162 |
| eukaryotic translation initiation factor 2 gamma subunit            | -33.1443299  |
| tetratricopeptide repeat (TPR)-containing protein                   | -58.33333333 |
| N/A                                                                 | -33.78378378 |
| telomerase reverse transcriptase                                    | -26.96629213 |
| ATPases;nucleotide binding;ATP binding;nucleoside-triphosphatas     | -100         |
| Transcription initiation factor TFIID subunit A                     | -100         |
| Small nuclear ribonucleoprotein family protein                      | -71.83673469 |
| exocyst complex component sec10                                     | -52.5        |
| pyruvate dehydrogenase E1 alpha                                     | -84.72222222 |
| Plant protein 1589 of unknown function                              | -40.12195122 |
| ARM repeat superfamily protein                                      | -85.48387097 |
| ARM repeat superfamily protein                                      | -49.73488865 |
| adenosine-5\'-phosphosulfate (APS) kinase 3                         | -100         |
| ARM repeat superfamily protein                                      | -100         |
| ENTH/VHS family protein                                             | -63.26530612 |
| regulatory particle triple-A 1A                                     | -42.56542997 |
| GDSL-motif lipase 5                                                 | -92.85714286 |
| NAC domain containing protein 85                                    | -89.47368421 |
| N/A                                                                 | -81.48148148 |
| N/A                                                                 | -44.52347084 |
| Disease resistance protein (TIR-NBS-LRR class) family               | -80.64516129 |
| RNA recognition motif (RRM)-containing protein                      | -100         |
| Leucine-rich repeat protein kinase family protein                   | -100         |
| RNA polymerase I specific transcription initiation factor RRN3 prot | -33.20261438 |
| TSL-kinase interacting protein 1                                    | -54.20899855 |
| calcium-dependent protein kinase 28                                 | -100         |
| S-adenosyl-L-methionine-dependent methyltransferases superfam       | -37.14285714 |
| N/A                                                                 | -56.25       |
| ARM repeat superfamily protein                                      | -43.47826087 |
| ARM repeat superfamily protein                                      | -95.23809524 |
| Protein of unknown function (DUF677)                                | -55.73770492 |
| Protein of unknown function (DUF1162)                               | -71.66666667 |
| Disease resistance protein (TIR-NBS-LRR class) family               | -38.46153846 |
| novel cap-binding protein                                           | -100         |

|                                                                 |              |
|-----------------------------------------------------------------|--------------|
| glutathione-disulfide reductase                                 | -61.29032258 |
| disease resistance protein (TIR-NBS-LRR class), putative        | -33.33333333 |
| Arabidopsis thaliana protein of unknown function (DUF821)       | -78.125      |
| Myosin heavy chain-related protein                              | -57.67195767 |
| CAP160 protein                                                  | -38.85714286 |
| tRNA synthetase class I (I, L, M and V) family protein          | -90.90909091 |
| Galactose oxidase/kelch repeat superfamily protein              | -98.46153846 |
| CW-type Zinc Finger                                             | -100         |
| multifunctional protein 2                                       | -100         |
| ATP-citrate lyase B-1                                           | -58.33333333 |
| ubiquitin protein ligase 6                                      | -52.38095238 |
| pleiotropic drug resistance 9                                   | -61.84210526 |
| Haloacid dehalogenase-like hydrolase (HAD) superfamily protein  | -91.66666667 |
| PA-domain containing subtilase family protein                   | -35.33204384 |
| Core-2/I-branching beta-1,6-N-acetylglucosaminyltransferase fam | -54.20168067 |
| Transducin/WD40 repeat-like superfamily protein                 | -62.5        |
| Phosphoribulokinase / Uridine kinase family                     | -78.125      |
| tRNA synthetase beta subunit family protein                     | -93.75       |
| Transducin family protein / WD-40 repeat family protein         | -100         |
| plastid transcriptionally active 2                              | -58.82352941 |
| malate dehydrogenase                                            | -68.75       |
| Ribosomal protein S5/Elongation factor G/III/V family protein   | -59.72222222 |
| FUS3-complementing gene 2                                       | -29.22374429 |
| AAA-type ATPase family protein                                  | -76.19047619 |
| N/A                                                             | -37.78284363 |
| PPPDE putative thiol peptidase family protein                   | -80          |
| ubiquitin C-terminal hydrolase 3                                | -100         |
| N/A                                                             | -80          |
| Arabinanase/levansucrase/invertase                              | -50          |
| phytochrome and flowering time regulatory protein (PFT1)        | -28.53670886 |
| N/A                                                             | -48.90510949 |
| N/A                                                             | -27.05902638 |
| Ribosomal protein S21 family protein                            | -83.60655738 |
| N/A                                                             | -50.64935065 |
| N/A                                                             | -39.77272727 |
| N/A                                                             | -43.47826087 |
| N/A                                                             | -35.8974359  |
| non-ATPase subunit 9                                            | -88.23529412 |
| Tetratricopeptide repeat (TPR)-like superfamily protein         | -40.54054054 |
| ENTH/VHS/GAT family protein                                     | -40.96385542 |
| N/A                                                             | -39.57960644 |
| N/A                                                             | -29.01234568 |
| RNA 2'-phosphotransferase, Tpt1 / KptA family                   | -36.11111111 |

|                                                                   |              |
|-------------------------------------------------------------------|--------------|
| Zinc finger protein 622                                           | -61.66666667 |
| ubiquitin-specific protease 26                                    | -27.69230769 |
| embryo defective 2410                                             | -40.54054054 |
| N/A                                                               | -26.88172043 |
| N/A                                                               | -28.26412138 |
| calcium-binding EF hand family protein                            | -39.43502825 |
| aberrant lateral root formation 4                                 | -100         |
| CTC-interacting domain 7                                          | -60          |
| histidine kinase 5                                                | -74.3902439  |
| Chalcone-flavanone isomerase family protein                       | -28.35820896 |
| Protein of unknown function (DUF1218)                             | -62          |
| RNA-binding protein 47C                                           | -77.5        |
| Protein phosphatase 2C family protein                             | -73.7704918  |
| Erythronate-4-phosphate dehydrogenase family protein              | -100         |
| UDP-Glycosyltransferase superfamily protein                       | -100         |
| LSD1-like 3                                                       | -100         |
| 5\'-3\' exoribonuclease 3                                         | -70.58823529 |
| phragmoplast-associated kinesin-related protein, putative         | -27.83505155 |
| ferritin 4                                                        | -31.81818182 |
| ferritin 4                                                        | -30.8083177  |
| N/A                                                               | -73.61111111 |
| N/A                                                               | -90.90909091 |
| sphere organelles protein-related                                 | -36.95652174 |
| sphere organelles protein-related                                 | -60          |
| DNAJ heat shock family protein                                    | -67.64705882 |
| SGNH hydrolase-type esterase superfamily protein                  | -73.52941176 |
| anthranilate synthase alpha subunit 1                             | -33.33333333 |
| translocon at the inner envelope membrane of chloroplasts 110     | -100         |
| potassium transporter 1                                           | -37.8968254  |
| peptide transporter 1                                             | -100         |
| Neutral/alkaline non-lysosomal ceramidase                         | -72.22222222 |
| NB-ARC domain-containing disease resistance protein               | -31.50684932 |
| NB-ARC domain-containing disease resistance protein               | -47.82608696 |
| NB-ARC domain-containing disease resistance protein               | -45.26315789 |
| glucan synthase-like 7                                            | -96.96969697 |
| N/A                                                               | -42.72727273 |
| N/A                                                               | -32.29376258 |
| kinesin like protein for actin based chloroplast movement 1       | -65.95744681 |
| Phototropic-responsive NPH3 family protein                        | -47.05882353 |
| Nuclear transport factor 2 (NTF2) family protein with RNA binding | -27.87787788 |
| GPI transamidase component PIG-S-related                          | -33.05785124 |
| dolichol-phosphate mannosyltransferase-related                    | -32.00147984 |
| N/A                                                               | -78.84615385 |



|                                                                     |              |
|---------------------------------------------------------------------|--------------|
| plant U-box 13                                                      | -30.6122449  |
| N/A                                                                 | -27.38828968 |
| AAA-type ATPase family protein                                      | -36.02614124 |
| Protein of unknown function (DUF674)                                | -27.20462329 |
| Yippee family putative zinc-binding protein                         | -32.59504132 |
| Protein of unknown function (DUF567)                                | -50.84745763 |
| Phosphoglycerate mutase, 2,3-bisphosphoglycerate-independent        | -70.59961315 |
| Serine/threonine-protein kinase Rio1                                | -56.25       |
| Protein kinase superfamily protein                                  | -72.22222222 |
| binding                                                             | -100         |
| ATPase, V1 complex, subunit B protein                               | -90          |
| Protein kinase superfamily protein                                  | -97.14285714 |
| Pentatricopeptide repeat (PPR-like) superfamily protein             | -38.8185654  |
| ARABIDILLO-1                                                        | -47.61904762 |
| little nuclei1                                                      | -32.72727273 |
| mitogen-activated protein kinase phosphatase 1                      | -27.03801945 |
| RNA-binding (RRM/RBD/RNP motifs) family protein                     | -100         |
| HEAT repeat-containing protein                                      | -100         |
| REF4-related 1                                                      | -92.30769231 |
| BAH domain ;TFIIS helical bundle-like domain                        | -75          |
| Heavy metal transport/detoxification superfamily protein            | -53.94957983 |
| SIN3-like 2                                                         | -80.55555556 |
| Pentatricopeptide repeat (PPR) superfamily protein                  | -41.57608696 |
| biotin carboxyl carrier protein 2                                   | -96.66666667 |
| PHD finger family protein                                           | -47.10144928 |
| cell division protein ftsH, putative                                | -63.69047619 |
| Proline-rich spliceosome-associated (PSP) family protein / zinc knu | -77.35849057 |
| RAB GTPase homolog A1D                                              | -65.38835324 |
| Cytochrome C1 family                                                | -79.41176471 |
| Mitochondrial ribosomal protein L37                                 | -47.36842105 |
| Ribonuclease inhibitor                                              | -100         |
| DEAD-box protein abstrakt, putative                                 | -90          |
| ARM repeat superfamily protein                                      | -83.33333333 |
| N/A                                                                 | -41.93548387 |
| N/A                                                                 | -80.95238095 |
| Peptidase M50 family protein                                        | -76.31578947 |
| Cyclin/Brf1-like TBP-binding protein                                | -43.61702128 |
| mitochondrial RNAediting factor 1                                   | -32.75862069 |
| spindle pole body component 98                                      | -70.14925373 |
| receptor-like kinase in in flowers 3                                | -25.3968254  |
| N/A                                                                 | -70.83333333 |
| myosin 2                                                            | -77.08333333 |
| Lipin family protein                                                | -100         |

|                                                                  |              |
|------------------------------------------------------------------|--------------|
| endomembrane-type CA-ATPase 4                                    | -60.86956522 |
| N/A                                                              | -84.61538462 |
| P-loop containing nucleoside triphosphate hydrolases superfamily | -44          |
| Ribosomal protein L13 family protein                             | -76.47058824 |
| Nucleotide-diphospho-sugar transferases superfamily protein      | -44.68085106 |
| ACT-like superfamily protein                                     | -59.3220339  |
| N/A                                                              | -26.54462243 |
| UDP-glucosyl transferase 73C2                                    | -26.54462243 |
| peroxin 6                                                        | -86.36363636 |
| NAD+ transporter 1                                               | -100         |
| WRKY DNA-binding protein 35                                      | -100         |
| N/A                                                              | -100         |
| DHHC-type zinc finger family protein                             | -65.51724138 |
| DNAJ heat shock N-terminal domain-containing protein             | -55.31914894 |
| transcription activators                                         | -50          |
| MuDR family transposase                                          | -47.5        |
| zinc knuckle (CCHC-type) family protein                          | -51.73745174 |
| RNA-binding (RRM/RBD/RNP motifs) family protein                  | -76.38888889 |
| FORMS APLOID AND BINUCLEATE CELLS 1C                             | -97.14285714 |
| O-fucosyltransferase family protein                              | -49.50146628 |
| purin-rich alpha 1                                               | -85.71428571 |
| Plant protein of unknown function (DUF863)                       | -100         |
| Got1/Sft2-like vesicle transport protein family                  | -96.2962963  |
| RINT-1 / TIP-1 family                                            | -66.9924812  |
| hAT dimerisation domain-containing protein / transposase-related | -66.9924812  |
| chitin elicitor receptor kinase 1                                | -100         |
| N/A                                                              | -85.8974359  |
| N/A                                                              | -28.24899026 |
| BLISTER                                                          | -67.59259259 |
| N/A                                                              | -67.59259259 |
| TRAF-like superfamily protein                                    | -48.88888889 |
| Arabidopsis phospholipase-like protein (PEARLI 4) family         | -90.90909091 |
| ARM repeat superfamily protein                                   | -36.36363636 |
| N/A                                                              | -44.44444444 |
| MBOAT (membrane bound O-acyl transferase) family protein         | -65.54487179 |
| N/A                                                              | -25.24959368 |
| Homeodomain-like protein with RING/FYVE/PHD-type zinc finger c   | -40.8445577  |
| transducin family protein / WD-40 repeat family protein          | -72.2222222  |
| N/A                                                              | -80.90909091 |
| Tesmin/TSO1-like CXC domain-containing protein                   | -55.88235294 |
| Kinase interacting (KIP1-like) family protein                    | -31.05010661 |
| phosphoglucomutase                                               | -63.15789474 |
| 2-oxoglutarate (2OG) and Fe(II)-dependent oxygenase superfamily  | -25.32440019 |

|                                                                  |              |
|------------------------------------------------------------------|--------------|
| N/A                                                              | -34.82772935 |
| Regulator of chromosome condensation (RCC1) family with FYVE z   | -42.57164404 |
| Pyridoxal phosphate (PLP)-dependent transferases superfamily pr  | -36.42089094 |
| FORMS APLOID AND BINUCLEATE CELLS 1A                             | -100         |
| Transmembrane Fragile-X-F-associated protein                     | -72.16117216 |
| Transmembrane Fragile-X-F-associated protein                     | -40.47619048 |
| NAC (No Apical Meristem) domain transcriptional regulator superl | -59.28853755 |
| N/A                                                              | -68.75       |
| mRNA splicing factor, thioredoxin-like U5 snRNP                  | -96.15384615 |
| phosphofructokinase 4                                            | -60.81081081 |
| N/A                                                              | -32.76315789 |
| UBX domain-containing protein                                    | -51.85185185 |
| RING/FYVE/PHD zinc finger superfamily protein                    | -84.14634146 |
| Eukaryotic aspartyl protease family protein                      | -100         |
| MIRO-related GTP-ase 1                                           | -93.33333333 |
| PRLI-interacting factor, putative                                | -62.05741627 |
| BRI1 suppressor 1 (BSU1)-like 2                                  | -82.8125     |
| N/A                                                              | -51.05359217 |
| exocyst subunit exo70 family protein A1                          | -100         |
| uricase / urate oxidase / nodulin 35, putative                   | -52.93040293 |
| nuclear RNA polymerase C1                                        | -44.42724458 |
| N/A                                                              | -83.33333333 |

---

| <b>q value</b> | <b>P value</b> |
|----------------|----------------|
| 0.00540647     | 1.10102E-05    |
| 0.00510403     | 1.00911E-05    |
| 0.009566348    | 2.35016E-05    |
| 2.14544E-06    | 6.16749E-10    |
| 3.19341E-14    | 1.05384E-18    |
| 0.005368098    | 1.08927E-05    |
| 1.25008E-06    | 3.34099E-10    |
| 0.000889943    | 1.00636E-06    |
| 0.000889943    | 1.00636E-06    |
| 0.005314371    | 1.06512E-05    |
| 1.54212E-05    | 6.34433E-09    |
| 0.003464669    | 6.03944E-06    |
| 0.005353107    | 1.08251E-05    |
| 0.001933999    | 2.83514E-06    |
| 0.000277356    | 2.24346E-07    |
| 0.000277356    | 2.24346E-07    |
| 0.000703599    | 7.25482E-07    |
| 1.541E-19      | 1.92113E-24    |
| 7.52347E-14    | 2.81381E-18    |
| 0.000181646    | 1.35073E-07    |
| 0.000762327    | 8.17325E-07    |
| 0.000703795    | 7.34042E-07    |
| 3.68684E-11    | 2.92001E-15    |
| 0.004244872    | 7.82592E-06    |
| 0.006111082    | 1.28843E-05    |
| 3.22832E-07    | 7.1734E-11     |
| 0.001242917    | 1.55316E-06    |
| 0.000274874    | 2.21331E-07    |
| 0.000425096    | 3.81258E-07    |
| 3.23074E-25    | 1.89539E-30    |
| 3.61557E-13    | 1.64389E-17    |
| 3.61557E-13    | 1.64389E-17    |
| 3.23074E-25    | 1.89539E-30    |
| 3.61557E-13    | 1.64389E-17    |
| 3.23074E-25    | 1.89539E-30    |
| 0.000651776    | 6.58117E-07    |
| 0.000213835    | 1.63087E-07    |
| 5.08029E-05    | 2.77928E-08    |
| 7.04898E-05    | 4.19747E-08    |
| 0.004817982    | 9.29591E-06    |
| 0.004343744    | 8.06555E-06    |

|             |             |
|-------------|-------------|
| 0.002018826 | 2.99947E-06 |
| 0.000310928 | 2.57869E-07 |
| 6.66226E-06 | 2.36957E-09 |
| 0.001555015 | 2.07089E-06 |
| 0.000835286 | 9.35975E-07 |
| 0.000299513 | 2.45357E-07 |
| 1.47653E-11 | 1.02866E-15 |
| 0.004921546 | 9.61483E-06 |
| 0.004121823 | 7.53011E-06 |
| 0.003019842 | 5.0293E-06  |
| 9.00353E-05 | 5.59245E-08 |
| 1.40706E-05 | 5.73713E-09 |
| 0.000428819 | 3.85855E-07 |
| 0.000293831 | 2.39396E-07 |
| 0.002079785 | 3.11582E-06 |
| 1.94386E-05 | 8.48179E-09 |
| 0.000142361 | 9.86571E-08 |
| 0.001275399 | 1.60591E-06 |
| 0.001417777 | 1.84133E-06 |
| 0.00014754  | 1.03544E-07 |
| 0.004770682 | 9.17316E-06 |
| 0.003941291 | 7.12658E-06 |
| 6.38129E-08 | 1.1044E-11  |
| 1.20754E-05 | 4.7962E-09  |
| 0.004452599 | 8.36236E-06 |
| 9.291E-06   | 3.49424E-09 |
| 1.6048E-16  | 3.88365E-21 |
| 0.006922846 | 1.52166E-05 |
| 0.000719383 | 7.61529E-07 |
| 2.00496E-14 | 6.46939E-19 |
| 0.000301963 | 2.48015E-07 |
| 0.000221818 | 1.70802E-07 |
| 0.000377032 | 3.29258E-07 |
| 0.00496173  | 9.72244E-06 |
| 0.000703795 | 7.39602E-07 |
| 0.000134474 | 9.17121E-08 |
| 0.002670807 | 4.29893E-06 |
| 0.001305715 | 1.65653E-06 |
| 0.005653257 | 1.16786E-05 |
| 0.000848064 | 9.5216E-07  |
| 0.00164928  | 2.23876E-06 |

|             |             |
|-------------|-------------|
| 0.007914422 | 1.81606E-05 |
| 0.005815286 | 1.2085E-05  |
| 0.004312652 | 7.98567E-06 |
| 5.94491E-10 | 5.79833E-14 |
| 0.007691319 | 1.74682E-05 |
| 0.001933999 | 2.83514E-06 |
| 0.009485397 | 2.32192E-05 |
| 6.89461E-08 | 1.20841E-11 |
| 9.4024E-06  | 3.54637E-09 |
| 2.79341E-06 | 8.46824E-10 |
| 0.000930973 | 1.06641E-06 |
| 0.000796198 | 8.74075E-07 |
| 0.007432213 | 1.67435E-05 |
| 0.000156893 | 1.1241E-07  |
| 0.004931351 | 9.6376E-06  |
| 0.000356554 | 3.05926E-07 |
| 3.03144E-06 | 9.4007E-10  |
| 0.005552448 | 1.13808E-05 |
| 0.007749937 | 1.76354E-05 |
| 0.001405002 | 1.8165E-06  |
| 0.002764235 | 4.49301E-06 |
| 0.000765705 | 8.2338E-07  |
| 1.90164E-07 | 3.91869E-11 |
| 0.000457565 | 4.18097E-07 |
| 9.23401E-05 | 5.79656E-08 |
| 0.003908528 | 7.04246E-06 |
| 0.004776659 | 9.19516E-06 |
| 0.000169544 | 1.23712E-07 |
| 0.009259271 | 2.24824E-05 |
| 0.009984992 | 2.48229E-05 |
| 1.00391E-07 | 1.86997E-11 |
| 2.12027E-06 | 6.07959E-10 |
| 0.0048666   | 9.40399E-06 |
| 0.00037888  | 3.3246E-07  |
| 0.000369017 | 3.20223E-07 |
| 0.001173157 | 1.42039E-06 |
| 0.005825239 | 1.21236E-05 |
| 0.008505711 | 2.01037E-05 |
| 0.002345145 | 3.64596E-06 |
| 0.002849701 | 4.67489E-06 |
| 1.18264E-06 | 3.12219E-10 |
| 0.000815725 | 9.05981E-07 |

|             |             |
|-------------|-------------|
| 0.008505711 | 2.01037E-05 |
| 1.55638E-08 | 2.19141E-12 |
| 0.000382766 | 3.37399E-07 |
| 0.000672504 | 6.84616E-07 |
| 4.62838E-12 | 2.81717E-16 |
| 0.000672504 | 6.84616E-07 |
| 4.62838E-12 | 2.81717E-16 |
| 0.00047655  | 4.39476E-07 |
| 0.000331513 | 2.78606E-07 |
| 0.001659154 | 2.25793E-06 |
| 0.000631379 | 6.29239E-07 |
| 0.007914422 | 1.81606E-05 |
| 0.000910494 | 1.03828E-06 |
| 0.005472757 | 1.11773E-05 |
| 0.001920592 | 2.72802E-06 |
| 0.006699323 | 1.4606E-05  |
| 0.009184995 | 2.22279E-05 |
| 0.004876312 | 9.44718E-06 |
| 0.000703795 | 7.37662E-07 |
| 5.77169E-05 | 3.27946E-08 |
| 1.28339E-05 | 5.16698E-09 |
| 0.002539761 | 4.02655E-06 |
| 0.001933999 | 2.83514E-06 |
| 6.01066E-07 | 1.459E-10   |
| 0.002434174 | 3.82899E-06 |
| 0.001841775 | 2.57974E-06 |
| 0.000903423 | 1.02512E-06 |
| 0.004921546 | 9.61483E-06 |
| 0.000476624 | 4.40055E-07 |
| 0.000526401 | 4.97594E-07 |
| 0.001240448 | 1.54644E-06 |
| 3.04088E-12 | 1.8063E-16  |
| 0.000377032 | 3.29579E-07 |
| 0.005869408 | 1.22371E-05 |
| 9.8502E-05  | 6.29894E-08 |
| 0.000440203 | 4.00618E-07 |
| 0.000834933 | 9.34967E-07 |
| 0.009314196 | 2.27045E-05 |
| 0.002100986 | 3.15851E-06 |
| 0.000476686 | 4.40462E-07 |
| 0.0059944   | 1.259E-05   |
| 0.00471802  | 9.00616E-06 |
| 5.62741E-05 | 3.18177E-08 |

|             |             |
|-------------|-------------|
| 3.22857E-05 | 1.55791E-08 |
| 2.76356E-05 | 1.28935E-08 |
| 2.69695E-08 | 4.11379E-12 |
| 2.41711E-09 | 2.78293E-13 |
| 0.001784439 | 2.47774E-06 |
| 5.97584E-06 | 2.09037E-09 |
| 0.000695012 | 7.13043E-07 |
| 3.22217E-05 | 1.55009E-08 |
| 0.000303905 | 2.50501E-07 |
| 0.006065956 | 1.27714E-05 |
| 0.000697205 | 7.16826E-07 |
| 0.00460798  | 8.72514E-06 |
| 0.004395021 | 8.19299E-06 |
| 0.007936784 | 1.82194E-05 |
| 0.000132304 | 8.96499E-08 |
| 0.008206862 | 1.91627E-05 |
| 9.09588E-05 | 5.65648E-08 |
| 9.09588E-05 | 5.65648E-08 |
| 0.001078932 | 1.28337E-06 |
| 0.001933999 | 2.83514E-06 |
| 1.19106E-05 | 4.71283E-09 |
| 1.39579E-06 | 3.85892E-10 |
| 0.000775974 | 8.38216E-07 |
| 8.12321E-06 | 2.9845E-09  |
| 0.004921546 | 9.61483E-06 |
| 0.008111141 | 1.88261E-05 |
| 0.000137899 | 9.49584E-08 |
| 0.000117533 | 7.85204E-08 |
| 0.001933999 | 2.83514E-06 |
| 0.000244683 | 1.93432E-07 |
| 0.00245867  | 3.87474E-06 |
| 0.008099053 | 1.87862E-05 |
| 0.007012912 | 1.55256E-05 |
| 0.000539075 | 5.1669E-07  |
| 3.88087E-07 | 9.04313E-11 |
| 0.006236312 | 1.3217E-05  |
| 0.004402063 | 8.21257E-06 |
| 0.000115391 | 7.66995E-08 |
| 0.001134763 | 1.36392E-06 |
| 0.002249117 | 3.46862E-06 |
| 0.002249117 | 3.46862E-06 |
| 4.92908E-05 | 2.67079E-08 |
| 0.001284776 | 1.62243E-06 |



|             |             |
|-------------|-------------|
| 1.00554E-09 | 1.05419E-13 |
| 0.000426023 | 3.82715E-07 |
| 0.000703795 | 7.39602E-07 |
| 0.004711596 | 8.9875E-06  |
| 0.007503301 | 1.69586E-05 |
| 0.008206862 | 1.91627E-05 |
| 0.004018222 | 7.31839E-06 |
| 3.3141E-05  | 1.6089E-08  |
| 0.005925316 | 1.2389E-05  |
| 0.004303843 | 7.96305E-06 |
| 0.003609909 | 6.36145E-06 |
| 0.009736237 | 2.40475E-05 |
| 0.00700902  | 1.55022E-05 |
| 0.000368267 | 3.19217E-07 |
| 0.000175386 | 1.29518E-07 |
| 0.000796198 | 8.74075E-07 |
| 0.000243473 | 1.92297E-07 |
| 0.00598506  | 1.2566E-05  |
| 0.00598506  | 1.2566E-05  |
| 3.94077E-06 | 1.29273E-09 |
| 1.81671E-22 | 1.86517E-27 |
| 0.005918528 | 1.23612E-05 |
| 7.87674E-06 | 2.87084E-09 |
| 0.001727111 | 2.37354E-06 |
| 0.000695012 | 7.13043E-07 |
| 1.24196E-07 | 2.42267E-11 |
| 1.24196E-07 | 2.42267E-11 |
| 0.002217143 | 3.40305E-06 |
| 2.05546E-07 | 4.34117E-11 |
| 0.003351354 | 5.77466E-06 |
| 0.000926295 | 1.06037E-06 |
| 0.001240448 | 1.54644E-06 |
| 0.000150272 | 1.06233E-07 |
| 0.00482238  | 9.30793E-06 |
| 2.48778E-09 | 2.90078E-13 |
| 0.00022401  | 1.72805E-07 |
| 0.00022401  | 1.72805E-07 |
| 0.007094679 | 1.57726E-05 |
| 5.09444E-06 | 1.74469E-09 |
| 1.20754E-05 | 4.80152E-09 |
| 4.96095E-08 | 8.36756E-12 |
| 0.005210367 | 1.04045E-05 |
| 0.000623005 | 6.17971E-07 |

|             |             |
|-------------|-------------|
| 0.000140179 | 9.70425E-08 |
| 4.02392E-05 | 2.04203E-08 |
| 3.18948E-06 | 1.01044E-09 |
| 4.18656E-05 | 2.15219E-08 |
| 0.000914884 | 1.04411E-06 |
| 0.000592594 | 5.79286E-07 |
| 0.000592594 | 5.79286E-07 |
| 0.000127505 | 8.6118E-08  |
| 0.003036641 | 5.07286E-06 |
| 0.004921546 | 9.61483E-06 |
| 0.00674261  | 1.47225E-05 |
| 6.22335E-07 | 1.52888E-10 |
| 8.74678E-05 | 5.4009E-08  |
| 0.00731223  | 1.64102E-05 |
| 0.000987439 | 1.14557E-06 |
| 0.000805269 | 8.87576E-07 |
| 0.001249711 | 1.56624E-06 |
| 9.89729E-06 | 3.76695E-09 |
| 0.000796198 | 8.74075E-07 |
| 6.03462E-06 | 2.11536E-09 |
| 0.00161963  | 2.19019E-06 |
| 2.04894E-05 | 8.98538E-09 |
| 0.001906341 | 2.69927E-06 |
| 0.002044314 | 3.04933E-06 |
| 0.001192665 | 1.44926E-06 |
| 0.000115391 | 7.61307E-08 |
| 4.30129E-05 | 2.22064E-08 |
| 6.4898E-07  | 1.60862E-10 |
| 0.000203014 | 1.53643E-07 |
| 0.001680862 | 2.29642E-06 |
| 0.00161376  | 2.18107E-06 |
| 3.06456E-06 | 9.52884E-10 |
| 8.95852E-12 | 5.84698E-16 |
| 3.22857E-05 | 1.55791E-08 |
| 1.89953E-08 | 2.73029E-12 |
| 0.007936784 | 1.82336E-05 |
| 1.55393E-07 | 3.09961E-11 |
| 1.90388E-10 | 1.63354E-14 |
| 0.001240448 | 1.54644E-06 |
| 6.46153E-07 | 1.59688E-10 |
| 2.36822E-05 | 1.06461E-08 |
| 0.000391002 | 3.46092E-07 |
| 0.002324156 | 3.6048E-06  |

|             |             |
|-------------|-------------|
| 6.07421E-06 | 2.13814E-09 |
| 3.05499E-07 | 6.74344E-11 |
| 0.003804626 | 6.81339E-06 |
| 0.001240448 | 1.54644E-06 |
| 0.008742198 | 2.08614E-05 |
| 0.005575491 | 1.14403E-05 |
| 1.8665E-06  | 5.31086E-10 |
| 0.001240448 | 1.54644E-06 |
| 0.000151513 | 1.07333E-07 |
| 0.00283208  | 4.63767E-06 |
| 6.59978E-07 | 1.65855E-10 |
| 3.10585E-08 | 4.91972E-12 |
| 0.00107249  | 1.27413E-06 |
| 0.001933999 | 2.83514E-06 |
| 1.41915E-08 | 1.96696E-12 |
| 0.007476304 | 1.68647E-05 |
| 2.22958E-06 | 6.52382E-10 |
| 0.001240448 | 1.54644E-06 |
| 0.005746026 | 1.1904E-05  |
| 1.19359E-09 | 1.31296E-13 |
| 0.004412727 | 8.23942E-06 |
| 3.10665E-12 | 1.86815E-16 |
| 0.000830814 | 9.28203E-07 |
| 3.22217E-05 | 1.55009E-08 |
| 0.002980767 | 4.9511E-06  |
| 9.291E-06   | 3.49531E-09 |
| 0.001933999 | 2.83514E-06 |
| 0.009092671 | 2.19311E-05 |
| 0.001190556 | 1.44408E-06 |
| 0.004312652 | 7.98567E-06 |
| 0.000559946 | 5.41212E-07 |
| 0.000534009 | 5.09877E-07 |
| 2.02603E-10 | 1.76807E-14 |
| 0.000299187 | 2.44418E-07 |
| 0.003440723 | 5.98256E-06 |
| 0.001228867 | 1.50587E-06 |
| 0.00295471  | 4.89482E-06 |
| 0.001933999 | 2.83514E-06 |
| 0.000308141 | 2.54457E-07 |
| 0.001933999 | 2.83514E-06 |
| 4.4312E-06  | 1.47206E-09 |
| 0.000150272 | 1.0607E-07  |
| 0.001933999 | 2.83514E-06 |

|             |             |
|-------------|-------------|
| 0.000534009 | 5.09877E-07 |
| 3.09357E-06 | 9.64173E-10 |
| 0.000115304 | 7.59321E-08 |
| 0.000165817 | 1.20749E-07 |
| 0.000652308 | 6.59186E-07 |
| 1.38669E-06 | 3.81343E-10 |
| 3.57038E-05 | 1.76474E-08 |
| 5.2241E-15  | 1.57073E-19 |
| 4.07776E-18 | 8.37309E-23 |
| 0.000396144 | 3.51516E-07 |
| 0.006687884 | 1.45664E-05 |
| 1.58957E-05 | 6.57453E-09 |
| 0.003058728 | 5.12097E-06 |
| 1.92012E-05 | 8.35004E-09 |
| 0.004183431 | 7.69118E-06 |
| 6.41886E-05 | 3.77518E-08 |
| 3.04347E-08 | 4.79859E-12 |
| 0.008180794 | 1.90718E-05 |
| 0.008180794 | 1.90718E-05 |
| 1.21274E-07 | 2.3301E-11  |
| 9.71966E-12 | 6.5576E-16  |
| 0.000908461 | 1.03396E-06 |
| 0.000435184 | 3.9254E-07  |
| 7.3107E-12  | 4.66427E-16 |
| 0.006485021 | 1.39533E-05 |
| 0.001319136 | 1.68033E-06 |
| 3.22969E-05 | 1.56082E-08 |
| 4.10791E-05 | 2.0967E-08  |
| 9.73237E-05 | 6.21645E-08 |
| 0.007936784 | 1.8241E-05  |
| 6.59978E-07 | 1.65394E-10 |
| 0.000796198 | 8.74075E-07 |
| 0.000703795 | 7.39602E-07 |
| 0.000709141 | 7.4782E-07  |
| 0.001217272 | 1.48709E-06 |
| 0.001564441 | 2.09491E-06 |
| 0.009227131 | 2.2384E-05  |
| 0.000756041 | 8.08922E-07 |
| 0.005815286 | 1.20901E-05 |
| 0.005353107 | 1.08251E-05 |
| 0.000939266 | 1.07798E-06 |
| 0.005508077 | 1.12793E-05 |
| 2.7736E-05  | 1.29769E-08 |

|             |             |
|-------------|-------------|
| 1.87179E-07 | 3.82972E-11 |
| 2.15153E-05 | 9.51416E-09 |
| 1.34565E-05 | 5.44723E-09 |
| 1.97241E-05 | 8.62084E-09 |
| 0.003167086 | 5.37397E-06 |
| 0.003538729 | 6.19514E-06 |
| 2.47103E-05 | 1.12532E-08 |
| 0.003758864 | 6.69009E-06 |
| 8.08049E-08 | 1.45773E-11 |
| 0.002502691 | 3.95513E-06 |
| 0.00803061  | 1.85391E-05 |
| 0.00490816  | 9.53829E-06 |
| 0.00097996  | 1.13546E-06 |
| 0.008526819 | 2.01911E-05 |
| 3.36592E-05 | 1.6464E-08  |
| 0.001933999 | 2.83514E-06 |
| 0.006316256 | 1.34698E-05 |
| 1.00554E-09 | 1.05448E-13 |
| 0.000366033 | 3.16743E-07 |
| 0.000366033 | 3.16743E-07 |
| 0.008460663 | 1.99228E-05 |
| 0.001098386 | 1.31376E-06 |
| 0.006463162 | 1.38826E-05 |
| 3.01362E-08 | 4.66499E-12 |
| 3.38468E-07 | 7.69459E-11 |
| 0.005907747 | 1.2333E-05  |
| 0.001604185 | 2.16343E-06 |
| 0.000115162 | 7.57544E-08 |
| 0.001933999 | 2.83514E-06 |
| 0.001906341 | 2.69927E-06 |
| 0.002053449 | 3.06747E-06 |
| 0.004921546 | 9.61483E-06 |
| 0.004158833 | 7.63375E-06 |
| 0.00731223  | 1.64078E-05 |
| 0.005375249 | 1.0919E-05  |
| 0.001736793 | 2.39194E-06 |
| 0.007294819 | 1.63376E-05 |
| 4.60684E-05 | 2.44257E-08 |
| 0.00047896  | 4.43266E-07 |
| 3.37981E-15 | 9.41851E-20 |
| 0.002964542 | 4.91328E-06 |
| 3.26251E-08 | 5.2875E-12  |
| 3.89581E-06 | 1.27085E-09 |

|             |             |
|-------------|-------------|
| 0.000297765 | 2.43038E-07 |
| 0.000703795 | 7.39602E-07 |
| 0.003482089 | 6.07236E-06 |
| 0.000881934 | 9.95361E-07 |
| 0.000157291 | 1.13041E-07 |
| 0.000703795 | 7.39602E-07 |
| 0.000703795 | 7.39602E-07 |
| 0.009877328 | 2.44901E-05 |
| 1.5665E-05  | 6.46563E-09 |
| 0.008276243 | 1.93793E-05 |
| 0.006094715 | 1.28409E-05 |
| 0.00014754  | 1.03544E-07 |
| 5.48454E-05 | 3.06882E-08 |
| 0.000703795 | 7.39602E-07 |
| 2.83675E-07 | 6.15771E-11 |
| 1.44069E-05 | 5.8848E-09  |
| 8.96769E-05 | 5.55738E-08 |
| 0.006961761 | 1.5362E-05  |
| 0.004346889 | 8.07457E-06 |
| 0.0003002   | 2.46346E-07 |
| 3.20131E-08 | 5.14192E-12 |
| 0.002895672 | 4.78003E-06 |
| 0.000703795 | 7.39602E-07 |
| 0.001278077 | 1.6121E-06  |
| 0.00078803  | 8.54717E-07 |
| 5.91799E-05 | 3.39379E-08 |
| 7.69704E-05 | 4.65676E-08 |
| 0.001955079 | 2.87321E-06 |
| 0.009723744 | 2.40095E-05 |
| 0.009723744 | 2.40095E-05 |
| 0.002980767 | 4.94903E-06 |
| 0.001933999 | 2.83514E-06 |
| 5.19877E-12 | 3.2406E-16  |
| 0.001933999 | 2.83514E-06 |
| 0.000646723 | 6.49273E-07 |
| 0.000224392 | 1.73442E-07 |
| 0.002847219 | 4.66873E-06 |
| 9.19326E-05 | 5.75246E-08 |
| 0.00327541  | 5.60865E-06 |
| 0.001240448 | 1.54644E-06 |
| 4.32189E-05 | 2.25468E-08 |
| 4.32189E-05 | 2.25468E-08 |
| 0.001933999 | 2.83514E-06 |

|             |             |
|-------------|-------------|
| 0.000169274 | 1.23391E-07 |
| 0.000543244 | 5.21085E-07 |
| 0.001217272 | 1.48809E-06 |
| 0.005353107 | 1.08251E-05 |
| 0.009161264 | 2.2157E-05  |
| 7.06526E-13 | 3.57506E-17 |
| 0.002116499 | 3.20046E-06 |
| 0.002116499 | 3.20046E-06 |
| 5.43973E-09 | 6.94116E-13 |
| 0.005317911 | 1.06642E-05 |
| 0.00048679  | 4.51227E-07 |
| 0.001407023 | 1.82014E-06 |
| 0.000277356 | 2.24346E-07 |
| 0.004548366 | 8.56891E-06 |
| 0.00075029  | 8.00567E-07 |
| 0.004158833 | 7.63375E-06 |
| 0.002483692 | 3.91964E-06 |
| 0.001240448 | 1.54644E-06 |
| 0.004921546 | 9.61483E-06 |
| 0.000440203 | 4.00618E-07 |
| 0.000163436 | 1.18536E-07 |
| 0.001116707 | 1.33731E-06 |
| 0.002133853 | 3.23296E-06 |
| 0.001933999 | 2.83514E-06 |
| 0.000594354 | 5.82281E-07 |
| 0.000902374 | 1.02306E-06 |
| 0.003804626 | 6.81339E-06 |
| 0.001845373 | 2.58613E-06 |
| 0.003941291 | 7.1275E-06  |
| 4.92908E-05 | 2.6642E-08  |
| 0.001933999 | 2.76347E-06 |
| 4.56796E-06 | 1.52419E-09 |
| 0.005607374 | 1.15345E-05 |
| 0.000115391 | 7.67513E-08 |
| 2.20482E-06 | 6.40286E-10 |
| 7.20898E-13 | 3.70064E-17 |
| 2.20482E-06 | 6.40286E-10 |
| 7.20898E-13 | 3.70064E-17 |
| 7.23175E-05 | 4.32753E-08 |
| 0.002256342 | 3.48142E-06 |
| 0.005600242 | 1.15116E-05 |
| 0.002752875 | 4.46961E-06 |
| 6.69421E-05 | 3.95676E-08 |

|             |             |
|-------------|-------------|
| 9.45991E-07 | 2.435E-10   |
| 3.37756E-08 | 5.57303E-12 |
| 0.007775091 | 1.77072E-05 |
| 0.001764726 | 2.43946E-06 |
| 0.000651776 | 6.57229E-07 |
| 0.001933999 | 2.83514E-06 |
| 8.63944E-08 | 1.58391E-11 |
| 0.000555182 | 5.35793E-07 |
| 0.00179871  | 2.50359E-06 |
| 0.000174085 | 1.27536E-07 |
| 0.000695076 | 7.14128E-07 |
| 0.000534009 | 5.09877E-07 |
| 3.22217E-05 | 1.55009E-08 |
| 5.09444E-06 | 1.74469E-09 |
| 3.25745E-07 | 7.26201E-11 |
| 1.23273E-05 | 4.94495E-09 |
| 1.79916E-05 | 7.57336E-09 |
| 1.79916E-05 | 7.57336E-09 |
| 0.000286403 | 2.32504E-07 |
| 0.004921546 | 9.61483E-06 |
| 0.000576571 | 5.59818E-07 |
| 0.002384256 | 3.72392E-06 |
| 9.24063E-12 | 6.09888E-16 |
| 0.000173994 | 1.27341E-07 |
| 0.001933999 | 2.83514E-06 |
| 0.002729491 | 4.41964E-06 |
| 6.33109E-05 | 3.70035E-08 |
| 0.000703795 | 7.39602E-07 |
| 0.00283208  | 4.63665E-06 |
| 8.46318E-06 | 3.12802E-09 |
| 0.003546663 | 6.22648E-06 |
| 0.002239627 | 3.44413E-06 |
| 8.59852E-06 | 3.18435E-09 |
| 0.003426762 | 5.93818E-06 |
| 3.00516E-05 | 1.41044E-08 |
| 0.001933999 | 2.83514E-06 |
| 7.70025E-06 | 2.77828E-09 |
| 0.000220413 | 1.69235E-07 |
| 0.00338527  | 5.84145E-06 |
| 0.004223776 | 7.77154E-06 |
| 7.75942E-08 | 1.37136E-11 |
| 0.001234475 | 1.51365E-06 |
| 0.000525153 | 4.9603E-07  |



|             |             |
|-------------|-------------|
| 1.80662E-05 | 7.75047E-09 |
| 0.001240448 | 1.53359E-06 |
| 1.90841E-09 | 2.16925E-13 |
| 2.43309E-06 | 7.30736E-10 |
| 0.001213165 | 1.47951E-06 |
| 0.000431551 | 3.88947E-07 |
| 0.001408473 | 1.82508E-06 |
| 6.72491E-06 | 2.39678E-09 |
| 0.004676298 | 8.89566E-06 |
| 0.001632497 | 2.21119E-06 |
| 0.007209879 | 1.6121E-05  |
| 0.000221651 | 1.7051E-07  |
| 0.001141307 | 1.37346E-06 |
| 0.00077132  | 8.32057E-07 |
| 0.00022659  | 1.75472E-07 |
| 9.45691E-05 | 5.99196E-08 |
| 3.43446E-09 | 4.13056E-13 |
| 0.003437998 | 5.97278E-06 |
| 5.68216E-09 | 7.29218E-13 |
| 0.003002729 | 4.99582E-06 |
| 0.000440203 | 4.00618E-07 |
| 6.05681E-05 | 3.5045E-08  |
| 4.06196E-05 | 2.06729E-08 |
| 0.003302396 | 5.66212E-06 |
| 0.00282938  | 4.62703E-06 |
| 0.000796198 | 8.74075E-07 |
| 1.22614E-06 | 3.26402E-10 |
| 1.22614E-06 | 3.26402E-10 |
| 3.90416E-09 | 4.75272E-13 |
| 0.006823164 | 1.49361E-05 |
| 0.006028518 | 1.26793E-05 |
| 0.001240448 | 1.54644E-06 |
| 0.000897336 | 1.01603E-06 |
| 0.001933999 | 2.83514E-06 |
| 0.006437877 | 1.38047E-05 |
| 3.33794E-05 | 1.62782E-08 |
| 0.009041152 | 2.17936E-05 |
| 0.000178546 | 1.32245E-07 |
| 0.000290218 | 2.35814E-07 |
| 0.006909491 | 1.51757E-05 |
| 3.49894E-11 | 2.71987E-15 |
| 1.13095E-05 | 4.42884E-09 |
| 0.001165037 | 1.408E-06   |

|             |             |
|-------------|-------------|
| 0.009307931 | 2.26619E-05 |
| 0.001146058 | 1.38086E-06 |
| 0.000206026 | 1.56375E-07 |
| 0.000803199 | 8.84706E-07 |
| 0.000937613 | 1.07539E-06 |
| 0.000739207 | 7.86573E-07 |
| 0.000400739 | 3.55887E-07 |
| 0.005976975 | 1.25358E-05 |
| 0.001574304 | 2.11389E-06 |
| 0.000740004 | 7.88125E-07 |
| 0.000703795 | 7.39602E-07 |
| 0.000440203 | 3.97918E-07 |
| 0.002363058 | 3.67554E-06 |
| 0.000403249 | 3.58411E-07 |
| 0.000403249 | 3.58411E-07 |
| 0.000277356 | 2.24346E-07 |
| 0.001378557 | 1.77119E-06 |
| 2.64031E-11 | 2.0137E-15  |
| 0.000320942 | 2.67369E-07 |
| 0.005032822 | 9.90604E-06 |
| 0.000124483 | 8.37112E-08 |
| 0.00294017  | 4.85564E-06 |
| 0.000796198 | 8.74075E-07 |
| 4.21979E-28 | 1.85673E-33 |
| 4.31419E-06 | 1.43003E-09 |
| 3.11045E-05 | 1.47354E-08 |
| 0.002105683 | 3.16712E-06 |
| 1.71117E-09 | 1.91995E-13 |
| 1.71117E-09 | 1.91995E-13 |
| 0.007946427 | 1.82794E-05 |
| 1.36355E-06 | 3.73979E-10 |
| 0.001853486 | 2.60158E-06 |
| 0.005066751 | 9.98397E-06 |
| 0.001687678 | 2.31192E-06 |
| 1.78499E-18 | 3.53433E-23 |
| 1.00554E-09 | 1.05053E-13 |
| 0.005615953 | 1.15686E-05 |
| 0.006502606 | 1.40293E-05 |
| 0.001781599 | 2.46801E-06 |
| 5.47806E-06 | 1.88812E-09 |
| 0.000440203 | 4.00618E-07 |
| 0.002144564 | 3.25705E-06 |
| 0.008532816 | 2.02116E-05 |

|             |             |
|-------------|-------------|
| 0.008034062 | 1.85581E-05 |
| 7.75404E-06 | 2.80337E-09 |
| 1.95441E-07 | 4.09612E-11 |
| 1.80111E-23 | 1.58499E-28 |
| 1.24175E-07 | 2.41316E-11 |
| 4.63306E-12 | 2.85399E-16 |
| 0.000603677 | 5.95432E-07 |
| 7.9429E-17  | 1.8057E-21  |
| 2.66834E-08 | 4.03101E-12 |
| 0.005499539 | 1.12481E-05 |
| 0.004902405 | 9.50913E-06 |
| 1.5665E-05  | 6.46763E-09 |
| 0.008716825 | 2.07434E-05 |
| 5.17853E-08 | 8.81988E-12 |
| 0.001933999 | 2.83514E-06 |
| 0.004596086 | 8.6824E-06  |
| 1.32714E-06 | 3.60236E-10 |
| 2.59003E-05 | 1.1966E-08  |
| 0.003019842 | 5.02766E-06 |
| 1.03034E-05 | 3.92906E-09 |
| 0.002674408 | 4.30691E-06 |
| 0.001933999 | 2.83514E-06 |
| 0.001933999 | 2.83514E-06 |
| 5.57695E-05 | 3.1356E-08  |
| 0.000258456 | 2.06595E-07 |
| 1.45627E-05 | 5.95911E-09 |
| 0.000353867 | 3.02268E-07 |
| 0.002338159 | 3.62995E-06 |
| 0.003538729 | 6.19709E-06 |
| 0.003948253 | 7.14299E-06 |
| 2.67194E-09 | 3.1547E-13  |
| 0.001240448 | 1.54644E-06 |
| 3.5453E-07  | 8.11174E-11 |
| 0.00272876  | 4.4147E-06  |
| 0.001240448 | 1.54644E-06 |
| 0.005646928 | 1.16614E-05 |
| 0.000137899 | 9.46457E-08 |
| 0.004696663 | 8.95162E-06 |
| 6.30823E-05 | 3.66386E-08 |
| 0.005976975 | 1.25256E-05 |
| 0.000594354 | 5.81537E-07 |
| 0.005600242 | 1.15116E-05 |
| 0.005353107 | 1.08251E-05 |

|             |             |
|-------------|-------------|
| 0.004675962 | 8.88473E-06 |
| 7.82812E-05 | 4.7705E-08  |
| 3.20131E-08 | 5.16483E-12 |
| 0.002694784 | 4.35158E-06 |
| 0.003460821 | 6.02766E-06 |
| 4.90256E-07 | 1.15767E-10 |
| 1.4959E-08  | 2.09528E-12 |
| 0.000440203 | 4.00618E-07 |
| 1.79916E-05 | 7.62613E-09 |
| 0.00391402  | 7.06096E-06 |
| 0.005615459 | 1.15552E-05 |
| 0.004592132 | 8.67156E-06 |
| 0.000188727 | 1.41723E-07 |
| 0.009569385 | 2.35301E-05 |
| 0.003901756 | 7.02676E-06 |
| 3.94347E-06 | 1.29846E-09 |
| 0.000152866 | 1.09163E-07 |
| 0.000825161 | 9.20394E-07 |
| 0.001933999 | 2.83514E-06 |
| 0.001239085 | 1.52203E-06 |
| 0.007623546 | 1.72863E-05 |
| 0.000364128 | 3.14829E-07 |
| 0.003167086 | 5.37439E-06 |
| 0.000115391 | 7.67359E-08 |
| 1.26164E-16 | 2.96068E-21 |
| 0.001784439 | 2.47849E-06 |
| 0.000703795 | 7.39602E-07 |
| 0.005242606 | 1.04843E-05 |
| 0.007912596 | 1.8139E-05  |
| 0.000679526 | 6.95363E-07 |
| 2.25816E-12 | 1.27512E-16 |
| 5.5189E-08  | 9.47053E-12 |
| 0.000161894 | 1.16705E-07 |
| 1.11215E-24 | 8.15585E-30 |
| 4.29438E-10 | 3.96804E-14 |
| 2.04572E-08 | 2.98541E-12 |
| 0.005825239 | 1.21236E-05 |
| 0.002338548 | 3.63227E-06 |
| 0.001884159 | 2.6543E-06  |
| 0.000204663 | 1.55191E-07 |
| 0.005639884 | 1.16344E-05 |
| 1.4686E-13  | 5.92341E-18 |
| 0.001659154 | 2.25824E-06 |

|             |             |
|-------------|-------------|
| 0.005368098 | 1.08927E-05 |
| 1.07017E-05 | 4.13588E-09 |
| 0.006637079 | 1.44167E-05 |
| 8.17472E-06 | 3.00942E-09 |
| 2.96636E-07 | 6.4608E-11  |
| 3.04177E-08 | 4.7736E-12  |
| 2.98325E-07 | 6.51947E-11 |
| 0.005553767 | 1.13916E-05 |
| 0.000319764 | 2.65918E-07 |
| 0.006488141 | 1.39743E-05 |
| 1.25154E-06 | 3.35917E-10 |
| 0.006603368 | 1.4286E-05  |
| 0.000646723 | 6.48445E-07 |
| 0.001933999 | 2.83514E-06 |
| 0.005353107 | 1.08251E-05 |
| 1.83775E-06 | 5.21557E-10 |
| 0.002394843 | 3.74781E-06 |
| 0.000195624 | 1.47619E-07 |
| 2.15676E-08 | 3.16328E-12 |
| 0.000926295 | 1.06022E-06 |
| 0.004847211 | 9.36297E-06 |
| 0.00327541  | 5.60865E-06 |
| 0.005426294 | 1.10705E-05 |
| 0.007151411 | 1.59483E-05 |
| 0.005381589 | 1.09359E-05 |
| 7.77224E-05 | 4.73075E-08 |
| 0.002800712 | 4.56988E-06 |
| 2.76356E-05 | 1.28935E-08 |
| 0.000243157 | 1.9169E-07  |
| 0.001933999 | 2.83514E-06 |
| 0.005009981 | 9.83638E-06 |
| 0.002942538 | 4.86309E-06 |
| 0.000704473 | 7.41348E-07 |
| 1.04662E-06 | 2.73239E-10 |
| 1.61356E-06 | 4.52016E-10 |
| 1.70743E-05 | 7.11209E-09 |
| 0.009976212 | 2.47938E-05 |
| 0.000910494 | 1.03814E-06 |
| 5.98645E-05 | 3.45062E-08 |
| 0.007337824 | 1.64985E-05 |
| 6.33332E-07 | 1.56055E-10 |
| 0.007322684 | 1.6443E-05  |
| 0.002157919 | 3.2805E-06  |

|             |             |
|-------------|-------------|
| 0.003545459 | 6.21927E-06 |
| 0.000107531 | 6.9867E-08  |
| 1.81671E-22 | 1.78575E-27 |
| 0.004434307 | 8.30525E-06 |
| 6.45494E-06 | 2.28163E-09 |
| 1.00554E-09 | 1.04438E-13 |
| 0.000703795 | 7.33411E-07 |
| 0.001627191 | 2.20161E-06 |
| 0.008546843 | 2.02511E-05 |
| 0.0002397   | 1.88262E-07 |
| 0.00295471  | 4.89482E-06 |
| 1.92469E-07 | 4.00852E-11 |
| 0.009486365 | 2.32324E-05 |
| 0.006746728 | 1.47391E-05 |
| 0.009894751 | 2.45405E-05 |
| 0.001768776 | 2.44766E-06 |
| 0.001933999 | 2.83514E-06 |
| 0.001933999 | 2.83514E-06 |
| 0.001904087 | 2.69215E-06 |
| 0.004932456 | 9.64338E-06 |
| 0.000598497 | 5.87251E-07 |
| 0.000823006 | 9.16783E-07 |
| 2.43309E-06 | 7.31558E-10 |
| 1.38812E-06 | 3.82756E-10 |
| 0.001437431 | 1.87529E-06 |
| 0.00010836  | 7.05647E-08 |
| 1.78787E-08 | 2.54358E-12 |
| 1.89176E-41 | 2.77461E-47 |
| 0.000523011 | 4.93239E-07 |
| 0.001735936 | 2.38948E-06 |
| 0.000440203 | 4.00618E-07 |
| 0.005869408 | 1.22371E-05 |
| 0.000240795 | 1.89475E-07 |
| 0.000308141 | 2.5444E-07  |
| 7.73161E-05 | 4.70035E-08 |
| 5.29223E-05 | 2.92629E-08 |
| 0.00284178  | 4.65641E-06 |
| 0.000649383 | 6.53373E-07 |
| 0.005368098 | 1.08852E-05 |
| 0.00909331  | 2.19393E-05 |
| 3.35904E-08 | 5.51784E-12 |
| 0.003785477 | 6.75967E-06 |
| 3.68175E-05 | 1.83059E-08 |

|             |             |
|-------------|-------------|
| 0.006922846 | 1.52339E-05 |
| 0.008526819 | 2.01911E-05 |
| 0.009296876 | 2.26282E-05 |
| 0.003960437 | 7.17084E-06 |
| 0.000833382 | 9.32619E-07 |
| 5.08666E-05 | 2.7865E-08  |
| 0.001496817 | 1.97911E-06 |
| 0.001496817 | 1.97911E-06 |
| 2.43736E-05 | 1.1082E-08  |
| 0.000796198 | 8.74075E-07 |
| 2.29387E-06 | 6.79605E-10 |
| 0.000703795 | 7.39602E-07 |
| 0.000944887 | 1.0865E-06  |
| 0.000799921 | 8.79922E-07 |
| 0.000554647 | 5.3487E-07  |
| 0.007842648 | 1.79097E-05 |
| 0.008498885 | 2.00536E-05 |
| 9.28656E-05 | 5.84316E-08 |
| 9.21935E-06 | 3.44807E-09 |
| 0.000945072 | 1.08741E-06 |
| 0.001933999 | 2.82117E-06 |
| 0.000796198 | 8.74075E-07 |
| 5.60705E-05 | 3.15792E-08 |
| 0.000512793 | 4.81722E-07 |
| 0.000512793 | 4.81722E-07 |
| 0.000440203 | 4.00618E-07 |
| 1.23273E-05 | 4.93644E-09 |
| 0.004622879 | 8.76014E-06 |
| 0.002982454 | 4.95609E-06 |
| 0.002982454 | 4.95609E-06 |
| 0.003702328 | 6.57318E-06 |
| 0.004921546 | 9.61483E-06 |
| 0.00635582  | 1.35821E-05 |
| 0.007447034 | 1.67823E-05 |
| 0.005068597 | 9.99132E-06 |
| 0.007733475 | 1.75809E-05 |
| 0.001017712 | 1.19114E-06 |
| 0.008968817 | 2.15798E-05 |
| 0.000144904 | 1.01057E-07 |
| 4.67456E-06 | 1.56567E-09 |
| 0.002393079 | 3.74329E-06 |
| 0.002793865 | 4.55665E-06 |
| 0.000463193 | 4.24259E-07 |

|             |             |
|-------------|-------------|
| 0.000979829 | 1.13459E-06 |
| 0.00047655  | 4.39637E-07 |
| 2.75723E-08 | 4.22596E-12 |
| 2.64011E-11 | 1.98005E-15 |
| 5.42254E-09 | 6.87946E-13 |
| 4.92908E-05 | 2.65406E-08 |
| 0.009486365 | 2.32425E-05 |
| 0.000620945 | 6.15197E-07 |
| 1.03113E-09 | 1.08889E-13 |
| 3.20131E-08 | 5.14321E-12 |
| 1.47339E-05 | 6.03996E-09 |
| 0.009192263 | 2.2259E-05  |
| 2.40672E-05 | 1.08897E-08 |
| 0.000703795 | 7.39602E-07 |
| 0.002195562 | 3.36519E-06 |
| 2.55693E-17 | 5.4378E-22  |
| 1.12951E-07 | 2.13706E-11 |
| 4.84E-44    | 3.54937E-50 |
| 0.000440203 | 4.00618E-07 |
| 0.001240448 | 1.53019E-06 |
| 0.004503487 | 8.47115E-06 |
| 2.14878E-12 | 1.1976E-16  |

---



**Supplemental Table 6: List of 350 hypo-methylated genes in Cf**  
**METHYLATED REGION**

---

mytileDiff25p200.hypo\_merged\_CHG.Chr01.668801-669000  
mytileDiff25p200.hypo\_merged\_CHG.Chr01.2190001-2190200  
mytileDiff25p200.hypo\_merged\_CHG.Chr01.15362801-15363000  
mytileDiff25p200.hypo\_merged\_CHG.Chr01.15362201-15362400  
mytileDiff25p200.hypo\_merged\_CHG.Chr01.16544001-16544200  
mytileDiff25p200.hypo\_merged\_CHG.Chr01.26997001-26997200  
mytileDiff25p200.hypo\_merged\_CHG.Chr01.26996801-26997000  
mytileDiff25p200.hypo\_merged\_CHG.Chr01.28298001-28298200  
mytileDiff25p200.hypo\_merged\_CHG.Chr01.33985201-33985400  
mytileDiff25p200.hypo\_merged\_CHG.Chr01.34325801-34326000  
mytileDiff25p200.hypo\_merged\_CHG.Chr01.39603801-39604000  
mytileDiff25p200.hypo\_merged\_CHG.Chr01.40579801-40580000  
mytileDiff25p200.hypo\_merged\_CHG.Chr01.40582201-40582400  
mytileDiff25p200.hypo\_merged\_CHG.Chr01.41289801-41290000  
mytileDiff25p200.hypo\_merged\_CHG.Chr01.41290201-41290400  
mytileDiff25p200.hypo\_merged\_CHG.Chr01.41290001-41290200  
mytileDiff25p200.hypo\_merged\_CHG.Chr01.48062001-48062200  
mytileDiff25p200.hypo\_merged\_CHG.Chr01.48068801-48069000  
mytileDiff25p200.hypo\_merged\_CHG.Chr01.48068801-48069000  
mytileDiff25p200.hypo\_merged\_CHG.Chr01.49102001-49102200  
mytileDiff25p200.hypo\_merged\_CHG.Chr01.53574201-53574400  
mytileDiff25p200.hypo\_merged\_CHG.Chr01.56617801-56618000  
mytileDiff25p200.hypo\_merged\_CHG.Chr01.56739601-56739800  
mytileDiff25p200.hypo\_merged\_CHG.Chr02.1125601-1125800  
mytileDiff25p200.hypo\_merged\_CHG.Chr02.8965401-8965600  
mytileDiff25p200.hypo\_merged\_CHG.Chr02.10913201-10913400  
mytileDiff25p200.hypo\_merged\_CHG.Chr02.13257601-13257800  
mytileDiff25p200.hypo\_merged\_CHG.Chr02.13257401-13257600  
mytileDiff25p200.hypo\_merged\_CHG.Chr02.14391001-14391200  
mytileDiff25p200.hypo\_merged\_CHG.Chr02.14391201-14391400  
mytileDiff25p200.hypo\_merged\_CHG.Chr02.14391001-14391200  
mytileDiff25p200.hypo\_merged\_CHG.Chr02.14391201-14391400  
mytileDiff25p200.hypo\_merged\_CHG.Chr02.14563801-14564000  
mytileDiff25p200.hypo\_merged\_CHG.Chr02.14663201-14663400  
mytileDiff25p200.hypo\_merged\_CHG.Chr02.21710401-21710600  
mytileDiff25p200.hypo\_merged\_CHG.Chr02.29698601-29698800  
mytileDiff25p200.hypo\_merged\_CHG.Chr02.30792401-30792600  
mytileDiff25p200.hypo\_merged\_CHG.Chr02.35801001-35801200  
mytileDiff25p200.hypo\_merged\_CHG.Chr02.36354801-36355000  
mytileDiff25p200.hypo\_merged\_CHG.Chr02.44502401-44502600  
mytileDiff25p200.hypo\_merged\_CHG.Chr02.46045401-46045600

mytileDiff25p200.hypo\_merged\_CHG.Chr02.46776201-46776400  
mytileDiff25p200.hypo\_merged\_CHG.Chr03.2994801-2995000  
mytileDiff25p200.hypo\_merged\_CHG.Chr03.3984601-3984800  
mytileDiff25p200.hypo\_merged\_CHG.Chr03.6127801-6128000  
mytileDiff25p200.hypo\_merged\_CHG.Chr03.6819801-6820000  
mytileDiff25p200.hypo\_merged\_CHG.Chr03.8213001-8213200  
mytileDiff25p200.hypo\_merged\_CHG.Chr03.9025201-9025400  
mytileDiff25p200.hypo\_merged\_CHG.Chr03.25259201-25259400  
mytileDiff25p200.hypo\_merged\_CHG.Chr03.27380001-27380200  
mytileDiff25p200.hypo\_merged\_CHG.Chr03.30029401-30029600  
mytileDiff25p200.hypo\_merged\_CHG.Chr03.32115201-32115400  
mytileDiff25p200.hypo\_merged\_CHG.Chr03.34806401-34806600  
mytileDiff25p200.hypo\_merged\_CHG.Chr03.37433601-37433800  
mytileDiff25p200.hypo\_merged\_CHG.Chr03.42801001-42801200  
mytileDiff25p200.hypo\_merged\_CHG.Chr03.42801001-42801200  
mytileDiff25p200.hypo\_merged\_CHG.Chr04.6703001-6703200  
mytileDiff25p200.hypo\_merged\_CHG.Chr04.8569001-8569200  
mytileDiff25p200.hypo\_merged\_CHG.Chr04.8585401-8585600  
mytileDiff25p200.hypo\_merged\_CHG.Chr04.8787401-8787600  
mytileDiff25p200.hypo\_merged\_CHG.Chr04.8787001-8787200  
mytileDiff25p200.hypo\_merged\_CHG.Chr04.9290201-9290400  
mytileDiff25p200.hypo\_merged\_CHG.Chr04.13085001-13085200  
mytileDiff25p200.hypo\_merged\_CHG.Chr04.13085001-13085200  
mytileDiff25p200.hypo\_merged\_CHG.Chr04.13313801-13314000  
mytileDiff25p200.hypo\_merged\_CHG.Chr04.13313001-13313200  
mytileDiff25p200.hypo\_merged\_CHG.Chr04.13396601-13396800  
mytileDiff25p200.hypo\_merged\_CHG.Chr04.13576401-13576600  
mytileDiff25p200.hypo\_merged\_CHG.Chr04.15256001-15256200  
mytileDiff25p200.hypo\_merged\_CHG.Chr04.16385001-16385200  
mytileDiff25p200.hypo\_merged\_CHG.Chr04.17867001-17867200  
mytileDiff25p200.hypo\_merged\_CHG.Chr04.22315201-22315400  
mytileDiff25p200.hypo\_merged\_CHG.Chr04.28664801-28665000  
mytileDiff25p200.hypo\_merged\_CHG.Chr04.35998601-35998800  
mytileDiff25p200.hypo\_merged\_CHG.Chr04.38567801-38568000  
mytileDiff25p200.hypo\_merged\_CHG.Chr04.40239201-40239400  
mytileDiff25p200.hypo\_merged\_CHG.Chr04.44968401-44968600  
mytileDiff25p200.hypo\_merged\_CHG.Chr04.44994601-44994800  
mytileDiff25p200.hypo\_merged\_CHG.Chr05.2784001-2784200  
mytileDiff25p200.hypo\_merged\_CHG.Chr05.2849801-2850000  
mytileDiff25p200.hypo\_merged\_CHG.Chr05.3976801-3977000  
mytileDiff25p200.hypo\_merged\_CHG.Chr05.5613801-5614000  
mytileDiff25p200.hypo\_merged\_CHG.Chr05.5673401-5673600  
mytileDiff25p200.hypo\_merged\_CHG.Chr05.6798201-6798400

mytileDiff25p200.hypo\_merged\_CHG.Chr05.9320601-9320800  
mytileDiff25p200.hypo\_merged\_CHG.Chr05.10543401-10543600  
mytileDiff25p200.hypo\_merged\_CHG.Chr05.10543401-10543600  
mytileDiff25p200.hypo\_merged\_CHG.Chr05.26683401-26683600  
mytileDiff25p200.hypo\_merged\_CHG.Chr05.26683201-26683400  
mytileDiff25p200.hypo\_merged\_CHG.Chr05.26682001-26682200  
mytileDiff25p200.hypo\_merged\_CHG.Chr05.30570801-30571000  
mytileDiff25p200.hypo\_merged\_CHG.Chr05.32891401-32891600  
mytileDiff25p200.hypo\_merged\_CHG.Chr05.41281401-41281600  
mytileDiff25p200.hypo\_merged\_CHG.Chr05.41282601-41282800  
mytileDiff25p200.hypo\_merged\_CHG.Chr05.41283601-41283800  
mytileDiff25p200.hypo\_merged\_CHG.Chr05.41282401-41282600  
mytileDiff25p200.hypo\_merged\_CHG.Chr05.41282801-41283000  
mytileDiff25p200.hypo\_merged\_CHG.Chr06.5116401-5116600  
mytileDiff25p200.hypo\_merged\_CHG.Chr06.6985001-6985200  
mytileDiff25p200.hypo\_merged\_CHG.Chr06.6985601-6985800  
mytileDiff25p200.hypo\_merged\_CHG.Chr06.8702201-8702400  
mytileDiff25p200.hypo\_merged\_CHG.Chr06.9349001-9349200  
mytileDiff25p200.hypo\_merged\_CHG.Chr06.14622001-14622200  
mytileDiff25p200.hypo\_merged\_CHG.Chr06.16074001-16074200  
mytileDiff25p200.hypo\_merged\_CHG.Chr06.17477201-17477400  
mytileDiff25p200.hypo\_merged\_CHG.Chr06.17477001-17477200  
mytileDiff25p200.hypo\_merged\_CHG.Chr06.17962001-17962200  
mytileDiff25p200.hypo\_merged\_CHG.Chr06.18846601-18846800  
mytileDiff25p200.hypo\_merged\_CHG.Chr06.19395801-19396000  
mytileDiff25p200.hypo\_merged\_CHG.Chr06.22013001-22013200  
mytileDiff25p200.hypo\_merged\_CHG.Chr06.22012801-22013000  
mytileDiff25p200.hypo\_merged\_CHG.Chr06.23642001-23642200  
mytileDiff25p200.hypo\_merged\_CHG.Chr06.23641801-23642000  
mytileDiff25p200.hypo\_merged\_CHG.Chr06.34550401-34550600  
mytileDiff25p200.hypo\_merged\_CHG.Chr06.34550201-34550400  
mytileDiff25p200.hypo\_merged\_CHG.Chr06.39107801-39108000  
mytileDiff25p200.hypo\_merged\_CHG.Chr06.40503801-40504000  
mytileDiff25p200.hypo\_merged\_CHG.Chr06.40553001-40553200  
mytileDiff25p200.hypo\_merged\_CHG.Chr06.44798401-44798600  
mytileDiff25p200.hypo\_merged\_CHG.Chr06.46208801-46209000  
mytileDiff25p200.hypo\_merged\_CHG.Chr06.47822001-47822200  
mytileDiff25p200.hypo\_merged\_CHG.Chr06.48557201-48557400  
mytileDiff25p200.hypo\_merged\_CHG.Chr06.49818401-49818600  
mytileDiff25p200.hypo\_merged\_CHG.Chr07.2265201-2265400  
mytileDiff25p200.hypo\_merged\_CHG.Chr07.6305401-6305600  
mytileDiff25p200.hypo\_merged\_CHG.Chr07.7200401-7200600  
mytileDiff25p200.hypo\_merged\_CHG.Chr07.7200401-7200600

mytileDiff25p200.hypo\_merged\_CHG.Chr07.7200401-7200600  
mytileDiff25p200.hypo\_merged\_CHG.Chr07.7200401-7200600  
mytileDiff25p200.hypo\_merged\_CHG.Chr07.9602601-9602800  
mytileDiff25p200.hypo\_merged\_CHG.Chr07.11724801-11725000  
mytileDiff25p200.hypo\_merged\_CHG.Chr07.14794401-14794600  
mytileDiff25p200.hypo\_merged\_CHG.Chr07.14937601-14937800  
mytileDiff25p200.hypo\_merged\_CHG.Chr07.14925601-14925800  
mytileDiff25p200.hypo\_merged\_CHG.Chr07.17991801-17992000  
mytileDiff25p200.hypo\_merged\_CHG.Chr07.35823401-35823600  
mytileDiff25p200.hypo\_merged\_CHG.Chr07.43834401-43834600  
mytileDiff25p200.hypo\_merged\_CHG.Chr08.9799801-9800000  
mytileDiff25p200.hypo\_merged\_CHG.Chr08.10657601-10657800  
mytileDiff25p200.hypo\_merged\_CHG.Chr08.10720801-10721000  
mytileDiff25p200.hypo\_merged\_CHG.Chr08.15684001-15684200  
mytileDiff25p200.hypo\_merged\_CHG.Chr08.17257201-17257400  
mytileDiff25p200.hypo\_merged\_CHG.Chr08.19514601-19514800  
mytileDiff25p200.hypo\_merged\_CHG.Chr08.19516601-19516800  
mytileDiff25p200.hypo\_merged\_CHG.Chr08.19515801-19516000  
mytileDiff25p200.hypo\_merged\_CHG.Chr08.20022401-20022600  
mytileDiff25p200.hypo\_merged\_CHG.Chr08.20051601-20051800  
mytileDiff25p200.hypo\_merged\_CHG.Chr08.20052001-20052200  
mytileDiff25p200.hypo\_merged\_CHG.Chr08.20051801-20052000  
mytileDiff25p200.hypo\_merged\_CHG.Chr08.20361801-20362000  
mytileDiff25p200.hypo\_merged\_CHG.Chr08.22360201-22360400  
mytileDiff25p200.hypo\_merged\_CHG.Chr08.30716801-30717000  
mytileDiff25p200.hypo\_merged\_CHG.Chr08.31505201-31505400  
mytileDiff25p200.hypo\_merged\_CHG.Chr08.35767601-35767800  
mytileDiff25p200.hypo\_merged\_CHG.Chr08.35767401-35767600  
mytileDiff25p200.hypo\_merged\_CHG.Chr08.36421401-36421600  
mytileDiff25p200.hypo\_merged\_CHG.Chr08.36421801-36422000  
mytileDiff25p200.hypo\_merged\_CHG.Chr08.36837601-36837800  
mytileDiff25p200.hypo\_merged\_CHG.Chr08.37717001-37717200  
mytileDiff25p200.hypo\_merged\_CHG.Chr08.37883801-37884000  
mytileDiff25p200.hypo\_merged\_CHG.Chr08.40031401-40031600  
mytileDiff25p200.hypo\_merged\_CHG.Chr08.40569401-40569600  
mytileDiff25p200.hypo\_merged\_CHG.Chr08.45975801-45976000  
mytileDiff25p200.hypo\_merged\_CHG.Chr08.46959801-46960000  
mytileDiff25p200.hypo\_merged\_CHG.Chr09.4019801-4020000  
mytileDiff25p200.hypo\_merged\_CHG.Chr09.5179401-5179600  
mytileDiff25p200.hypo\_merged\_CHG.Chr09.6378001-6378200  
mytileDiff25p200.hypo\_merged\_CHG.Chr09.6378601-6378800  
mytileDiff25p200.hypo\_merged\_CHG.Chr09.10045201-10045400  
mytileDiff25p200.hypo\_merged\_CHG.Chr09.10144601-10144800

mytileDiff25p200.hypo\_merged\_CHG.Chr09.14244801-14245000  
mytileDiff25p200.hypo\_merged\_CHG.Chr09.21806201-21806400  
mytileDiff25p200.hypo\_merged\_CHG.Chr09.21806201-21806400  
mytileDiff25p200.hypo\_merged\_CHG.Chr09.27027201-27027400  
mytileDiff25p200.hypo\_merged\_CHG.Chr09.29200401-29200600  
mytileDiff25p200.hypo\_merged\_CHG.Chr09.30191401-30191600  
mytileDiff25p200.hypo\_merged\_CHG.Chr09.32431601-32431800  
mytileDiff25p200.hypo\_merged\_CHG.Chr09.32617801-32618000  
mytileDiff25p200.hypo\_merged\_CHG.Chr09.36023601-36023800  
mytileDiff25p200.hypo\_merged\_CHG.Chr09.36688201-36688400  
mytileDiff25p200.hypo\_merged\_CHG.Chr09.41874201-41874400  
mytileDiff25p200.hypo\_merged\_CHG.Chr09.42691801-42692000  
mytileDiff25p200.hypo\_merged\_CHG.Chr10.795601-795800  
mytileDiff25p200.hypo\_merged\_CHG.Chr10.2025801-2026000  
mytileDiff25p200.hypo\_merged\_CHG.Chr10.6352801-6353000  
mytileDiff25p200.hypo\_merged\_CHG.Chr10.6373801-6374000  
mytileDiff25p200.hypo\_merged\_CHG.Chr10.7873801-7874000  
mytileDiff25p200.hypo\_merged\_CHG.Chr10.8904401-8904600  
mytileDiff25p200.hypo\_merged\_CHG.Chr10.13847801-13848000  
mytileDiff25p200.hypo\_merged\_CHG.Chr10.13847401-13847600  
mytileDiff25p200.hypo\_merged\_CHG.Chr10.13847601-13847800  
mytileDiff25p200.hypo\_merged\_CHG.Chr10.13848001-13848200  
mytileDiff25p200.hypo\_merged\_CHG.Chr10.13848201-13848400  
mytileDiff25p200.hypo\_merged\_CHG.Chr10.17202001-17202200  
mytileDiff25p200.hypo\_merged\_CHG.Chr10.22643001-22643200  
mytileDiff25p200.hypo\_merged\_CHG.Chr10.24675001-24675200  
mytileDiff25p200.hypo\_merged\_CHG.Chr10.26257001-26257200  
mytileDiff25p200.hypo\_merged\_CHG.Chr10.30292401-30292600  
mytileDiff25p200.hypo\_merged\_CHG.Chr10.32151201-32151400  
mytileDiff25p200.hypo\_merged\_CHG.Chr10.32167601-32167800  
mytileDiff25p200.hypo\_merged\_CHG.Chr10.39381401-39381600  
mytileDiff25p200.hypo\_merged\_CHG.Chr10.43400601-43400800  
mytileDiff25p200.hypo\_merged\_CHG.Chr10.45973601-45973800  
mytileDiff25p200.hypo\_merged\_CHG.Chr10.46253401-46253600  
mytileDiff25p200.hypo\_merged\_CHG.Chr10.47443601-47443800  
mytileDiff25p200.hypo\_merged\_CHG.Chr10.51130401-51130600  
mytileDiff25p200.hypo\_merged\_CHG.Chr10.51537601-51537800  
mytileDiff25p200.hypo\_merged\_CHG.Chr11.2690801-2691000  
mytileDiff25p200.hypo\_merged\_CHG.Chr11.34650001-34650200  
mytileDiff25p200.hypo\_merged\_CHG.Chr12.3665001-3665200  
mytileDiff25p200.hypo\_merged\_CHG.Chr12.8240601-8240800  
mytileDiff25p200.hypo\_merged\_CHG.Chr12.11901201-11901400  
mytileDiff25p200.hypo\_merged\_CHG.Chr12.15257201-15257400

mytileDiff25p200.hypo\_merged\_CHG.Chr12.22911001-22911200  
mytileDiff25p200.hypo\_merged\_CHG.Chr12.23294201-23294400  
mytileDiff25p200.hypo\_merged\_CHG.Chr12.24885201-24885400  
mytileDiff25p200.hypo\_merged\_CHG.Chr12.26140801-26141000  
mytileDiff25p200.hypo\_merged\_CHG.Chr12.36588401-36588600  
mytileDiff25p200.hypo\_merged\_CHG.Chr13.1003201-1003400  
mytileDiff25p200.hypo\_merged\_CHG.Chr13.6127201-6127400  
mytileDiff25p200.hypo\_merged\_CHG.Chr13.9599201-9599400  
mytileDiff25p200.hypo\_merged\_CHG.Chr13.9599401-9599600  
mytileDiff25p200.hypo\_merged\_CHG.Chr13.9599401-9599600  
mytileDiff25p200.hypo\_merged\_CHG.Chr13.9599201-9599400  
mytileDiff25p200.hypo\_merged\_CHG.Chr13.10063801-10064000  
mytileDiff25p200.hypo\_merged\_CHG.Chr13.10932601-10932800  
mytileDiff25p200.hypo\_merged\_CHG.Chr13.14437001-14437200  
mytileDiff25p200.hypo\_merged\_CHG.Chr13.15645601-15645800  
mytileDiff25p200.hypo\_merged\_CHG.Chr13.15956801-15957000  
mytileDiff25p200.hypo\_merged\_CHG.Chr13.18402401-18402600  
mytileDiff25p200.hypo\_merged\_CHG.Chr13.27186601-27186800  
mytileDiff25p200.hypo\_merged\_CHG.Chr13.27213201-27213400  
mytileDiff25p200.hypo\_merged\_CHG.Chr13.28080001-28080200  
mytileDiff25p200.hypo\_merged\_CHG.Chr13.28940601-28940800  
mytileDiff25p200.hypo\_merged\_CHG.Chr13.29845201-29845400  
mytileDiff25p200.hypo\_merged\_CHG.Chr13.34420801-34421000  
mytileDiff25p200.hypo\_merged\_CHG.Chr13.38494801-38495000  
mytileDiff25p200.hypo\_merged\_CHG.Chr13.40225401-40225600  
mytileDiff25p200.hypo\_merged\_CHG.Chr13.45755601-45755800  
mytileDiff25p200.hypo\_merged\_CHG.Chr14.2270801-2271000  
mytileDiff25p200.hypo\_merged\_CHG.Chr14.3477801-3478000  
mytileDiff25p200.hypo\_merged\_CHG.Chr14.8466201-8466400  
mytileDiff25p200.hypo\_merged\_CHG.Chr14.10693201-10693400  
mytileDiff25p200.hypo\_merged\_CHG.Chr14.10792401-10792600  
mytileDiff25p200.hypo\_merged\_CHG.Chr14.10791201-10791400  
mytileDiff25p200.hypo\_merged\_CHG.Chr14.11114401-11114600  
mytileDiff25p200.hypo\_merged\_CHG.Chr14.11965001-11965200  
mytileDiff25p200.hypo\_merged\_CHG.Chr14.12527001-12527200  
mytileDiff25p200.hypo\_merged\_CHG.Chr14.16617801-16618000  
mytileDiff25p200.hypo\_merged\_CHG.Chr14.16617601-16617800  
mytileDiff25p200.hypo\_merged\_CHG.Chr14.16911801-16912000  
mytileDiff25p200.hypo\_merged\_CHG.Chr14.21300001-21300200  
mytileDiff25p200.hypo\_merged\_CHG.Chr14.26607201-26607400  
mytileDiff25p200.hypo\_merged\_CHG.Chr14.27583401-27583600  
mytileDiff25p200.hypo\_merged\_CHG.Chr14.28603601-28603800  
mytileDiff25p200.hypo\_merged\_CHG.Chr14.30185801-30186000

mytileDiff25p200.hypo\_merged\_CHG.Chr14.32531401-32531600  
mytileDiff25p200.hypo\_merged\_CHG.Chr14.35614201-35614400  
mytileDiff25p200.hypo\_merged\_CHG.Chr14.37186801-37187000  
mytileDiff25p200.hypo\_merged\_CHG.Chr14.37187401-37187600  
mytileDiff25p200.hypo\_merged\_CHG.Chr14.38124001-38124200  
mytileDiff25p200.hypo\_merged\_CHG.Chr14.39033401-39033600  
mytileDiff25p200.hypo\_merged\_CHG.Chr14.39033001-39033200  
mytileDiff25p200.hypo\_merged\_CHG.Chr14.39033601-39033800  
mytileDiff25p200.hypo\_merged\_CHG.Chr14.39890401-39890600  
mytileDiff25p200.hypo\_merged\_CHG.Chr14.39890001-39890200  
mytileDiff25p200.hypo\_merged\_CHG.Chr14.39911601-39911800  
mytileDiff25p200.hypo\_merged\_CHG.Chr14.40433601-40433800  
mytileDiff25p200.hypo\_merged\_CHG.Chr14.40433401-40433600  
mytileDiff25p200.hypo\_merged\_CHG.Chr14.41252601-41252800  
mytileDiff25p200.hypo\_merged\_CHG.Chr14.45740601-45740800  
mytileDiff25p200.hypo\_merged\_CHG.Chr14.46583001-46583200  
mytileDiff25p200.hypo\_merged\_CHG.Chr14.47667201-47667400  
mytileDiff25p200.hypo\_merged\_CHG.Chr15.570401-570600  
mytileDiff25p200.hypo\_merged\_CHG.Chr15.2436201-2436400  
mytileDiff25p200.hypo\_merged\_CHG.Chr15.3726201-3726400  
mytileDiff25p200.hypo\_merged\_CHG.Chr15.5876601-5876800  
mytileDiff25p200.hypo\_merged\_CHG.Chr15.9986401-9986600  
mytileDiff25p200.hypo\_merged\_CHG.Chr15.9986001-9986200  
mytileDiff25p200.hypo\_merged\_CHG.Chr15.10092401-10092600  
mytileDiff25p200.hypo\_merged\_CHG.Chr15.10886801-10887000  
mytileDiff25p200.hypo\_merged\_CHG.Chr15.13756001-13756200  
mytileDiff25p200.hypo\_merged\_CHG.Chr15.14010601-14010800  
mytileDiff25p200.hypo\_merged\_CHG.Chr15.16036801-16037000  
mytileDiff25p200.hypo\_merged\_CHG.Chr15.17768201-17768400  
mytileDiff25p200.hypo\_merged\_CHG.Chr15.17769001-17769200  
mytileDiff25p200.hypo\_merged\_CHG.Chr15.17768801-17769000  
mytileDiff25p200.hypo\_merged\_CHG.Chr15.17768601-17768800  
mytileDiff25p200.hypo\_merged\_CHG.Chr15.20910601-20910800  
mytileDiff25p200.hypo\_merged\_CHG.Chr15.20914601-20914800  
mytileDiff25p200.hypo\_merged\_CHG.Chr15.22867401-22867600  
mytileDiff25p200.hypo\_merged\_CHG.Chr15.27254401-27254600  
mytileDiff25p200.hypo\_merged\_CHG.Chr15.27253601-27253800  
mytileDiff25p200.hypo\_merged\_CHG.Chr15.27255601-27255800  
mytileDiff25p200.hypo\_merged\_CHG.Chr15.27254601-27254800  
mytileDiff25p200.hypo\_merged\_CHG.Chr15.27282001-27282200  
mytileDiff25p200.hypo\_merged\_CHG.Chr15.32959201-32959400  
mytileDiff25p200.hypo\_merged\_CHG.Chr15.33543001-33543200  
mytileDiff25p200.hypo\_merged\_CHG.Chr15.33542801-33543000

mytileDiff25p200.hypo\_merged\_CHG.Chr15.33613001-33613200  
mytileDiff25p200.hypo\_merged\_CHG.Chr15.38033801-38034000  
mytileDiff25p200.hypo\_merged\_CHG.Chr15.39930401-39930600  
mytileDiff25p200.hypo\_merged\_CHG.Chr15.41549401-41549600  
mytileDiff25p200.hypo\_merged\_CHG.Chr15.45520401-45520600  
mytileDiff25p200.hypo\_merged\_CHG.Chr15.46684401-46684600  
mytileDiff25p200.hypo\_merged\_CHG.Chr15.46684801-46685000  
mytileDiff25p200.hypo\_merged\_CHG.Chr15.46684601-46684800  
mytileDiff25p200.hypo\_merged\_CHG.Chr15.46744801-46745000  
mytileDiff25p200.hypo\_merged\_CHG.Chr15.47407201-47407400  
mytileDiff25p200.hypo\_merged\_CHG.Chr15.48068401-48068600  
mytileDiff25p200.hypo\_merged\_CHG.Chr16.5146001-5146200  
mytileDiff25p200.hypo\_merged\_CHG.Chr16.5564201-5564400  
mytileDiff25p200.hypo\_merged\_CHG.Chr16.5674201-5674400  
mytileDiff25p200.hypo\_merged\_CHG.Chr16.6638801-6639000  
mytileDiff25p200.hypo\_merged\_CHG.Chr16.7443201-7443400  
mytileDiff25p200.hypo\_merged\_CHG.Chr16.11152001-11152200  
mytileDiff25p200.hypo\_merged\_CHG.Chr16.14216201-14216400  
mytileDiff25p200.hypo\_merged\_CHG.Chr16.14809001-14809200  
mytileDiff25p200.hypo\_merged\_CHG.Chr16.25033001-25033200  
mytileDiff25p200.hypo\_merged\_CHG.Chr16.25197801-25198000  
mytileDiff25p200.hypo\_merged\_CHG.Chr16.25316401-25316600  
mytileDiff25p200.hypo\_merged\_CHG.Chr16.25583401-25583600  
mytileDiff25p200.hypo\_merged\_CHG.Chr16.25583401-25583600  
mytileDiff25p200.hypo\_merged\_CHG.Chr16.25676401-25676600  
mytileDiff25p200.hypo\_merged\_CHG.Chr16.25675401-25675600  
mytileDiff25p200.hypo\_merged\_CHG.Chr16.28527201-28527400  
mytileDiff25p200.hypo\_merged\_CHG.Chr16.29356001-29356200  
mytileDiff25p200.hypo\_merged\_CHG.Chr16.30920001-30920200  
mytileDiff25p200.hypo\_merged\_CHG.Chr16.31948401-31948600  
mytileDiff25p200.hypo\_merged\_CHG.Chr16.32362801-32363000  
mytileDiff25p200.hypo\_merged\_CHG.Chr16.33297001-33297200  
mytileDiff25p200.hypo\_merged\_CHG.Chr16.33315001-33315200  
mytileDiff25p200.hypo\_merged\_CHG.Chr16.34395001-34395200  
mytileDiff25p200.hypo\_merged\_CHG.Chr16.34503401-34503600  
mytileDiff25p200.hypo\_merged\_CHG.Chr17.98601-98800  
mytileDiff25p200.hypo\_merged\_CHG.Chr17.3116201-3116400  
mytileDiff25p200.hypo\_merged\_CHG.Chr17.7381401-7381600  
mytileDiff25p200.hypo\_merged\_CHG.Chr17.10407401-10407600  
mytileDiff25p200.hypo\_merged\_CHG.Chr17.12464801-12465000  
mytileDiff25p200.hypo\_merged\_CHG.Chr17.15681601-15681800  
mytileDiff25p200.hypo\_merged\_CHG.Chr17.16418001-16418200  
mytileDiff25p200.hypo\_merged\_CHG.Chr17.16417801-16418000



mytileDiff25p200.hypo\_merged\_CHG.Chr17.16416001-16416200  
mytileDiff25p200.hypo\_merged\_CHG.Chr17.16417001-16417200  
mytileDiff25p200.hypo\_merged\_CHG.Chr17.16416801-16417000  
mytileDiff25p200.hypo\_merged\_CHG.Chr17.16417201-16417400  
mytileDiff25p200.hypo\_merged\_CHG.Chr17.17885201-17885400  
mytileDiff25p200.hypo\_merged\_CHG.Chr17.22996401-22996600  
mytileDiff25p200.hypo\_merged\_CHG.Chr17.26564001-26564200  
mytileDiff25p200.hypo\_merged\_CHG.Chr17.27305801-27306000  
mytileDiff25p200.hypo\_merged\_CHG.Chr17.32890401-32890600  
mytileDiff25p200.hypo\_merged\_CHG.Chr17.33583001-33583200  
mytileDiff25p200.hypo\_merged\_CHG.Chr17.33583001-33583200  
mytileDiff25p200.hypo\_merged\_CHG.Chr17.33852001-33852200  
mytileDiff25p200.hypo\_merged\_CHG.Chr17.33995001-33995200  
mytileDiff25p200.hypo\_merged\_CHG.Chr17.35206801-35207000  
mytileDiff25p200.hypo\_merged\_CHG.Chr17.37450801-37451000  
mytileDiff25p200.hypo\_merged\_CHG.Chr17.37498601-37498800  
mytileDiff25p200.hypo\_merged\_CHG.Chr17.39054401-39054600  
mytileDiff25p200.hypo\_merged\_CHG.Chr17.39053601-39053800  
mytileDiff25p200.hypo\_merged\_CHG.Chr18.13801-14000  
mytileDiff25p200.hypo\_merged\_CHG.Chr18.13601-13800  
mytileDiff25p200.hypo\_merged\_CHG.Chr18.367801-368000  
mytileDiff25p200.hypo\_merged\_CHG.Chr18.1447601-1447800  
mytileDiff25p200.hypo\_merged\_CHG.Chr18.8675601-8675800  
mytileDiff25p200.hypo\_merged\_CHG.Chr18.9501001-9501200  
mytileDiff25p200.hypo\_merged\_CHG.Chr18.12632001-12632200  
mytileDiff25p200.hypo\_merged\_CHG.Chr18.12632201-12632400  
mytileDiff25p200.hypo\_merged\_CHG.Chr18.14750401-14750600  
mytileDiff25p200.hypo\_merged\_CHG.Chr18.17155201-17155400  
mytileDiff25p200.hypo\_merged\_CHG.Chr18.17413801-17414000  
mytileDiff25p200.hypo\_merged\_CHG.Chr18.20283401-20283600  
mytileDiff25p200.hypo\_merged\_CHG.Chr18.21363201-21363400  
mytileDiff25p200.hypo\_merged\_CHG.Chr18.21363001-21363200  
mytileDiff25p200.hypo\_merged\_CHG.Chr18.22413601-22413800  
mytileDiff25p200.hypo\_merged\_CHG.Chr18.26891001-26891200  
mytileDiff25p200.hypo\_merged\_CHG.Chr18.26910001-26910200  
mytileDiff25p200.hypo\_merged\_CHG.Chr18.34248601-34248800  
mytileDiff25p200.hypo\_merged\_CHG.Chr18.35100001-35100200  
mytileDiff25p200.hypo\_merged\_CHG.Chr18.37022001-37022200  
mytileDiff25p200.hypo\_merged\_CHG.Chr18.38962601-38962800  
mytileDiff25p200.hypo\_merged\_CHG.Chr18.38961801-38962000  
mytileDiff25p200.hypo\_merged\_CHG.Chr18.40503601-40503800  
mytileDiff25p200.hypo\_merged\_CHG.Chr18.46858801-46859000  
mytileDiff25p200.hypo\_merged\_CHG.Chr18.47905601-47905800

mytileDiff25p200.hypo\_merged\_CHG.Chr18.53007201-53007400  
mytileDiff25p200.hypo\_merged\_CHG.Chr18.53007401-53007600  
mytileDiff25p200.hypo\_merged\_CHG.Chr18.56058001-56058200  
mytileDiff25p200.hypo\_merged\_CHG.Chr18.57526801-57527000  
mytileDiff25p200.hypo\_merged\_CHG.Chr19.300001-300200  
mytileDiff25p200.hypo\_merged\_CHG.Chr19.2910201-2910400  
mytileDiff25p200.hypo\_merged\_CHG.Chr19.3846201-3846400  
mytileDiff25p200.hypo\_merged\_CHG.Chr19.6402601-6402800  
mytileDiff25p200.hypo\_merged\_CHG.Chr19.6402801-6403000  
mytileDiff25p200.hypo\_merged\_CHG.Chr19.6403001-6403200  
mytileDiff25p200.hypo\_merged\_CHG.Chr19.10309401-10309600  
mytileDiff25p200.hypo\_merged\_CHG.Chr19.11634601-11634800  
mytileDiff25p200.hypo\_merged\_CHG.Chr19.12185001-12185200  
mytileDiff25p200.hypo\_merged\_CHG.Chr19.12185601-12185800  
mytileDiff25p200.hypo\_merged\_CHG.Chr19.12975201-12975400  
mytileDiff25p200.hypo\_merged\_CHG.Chr19.18377401-18377600  
mytileDiff25p200.hypo\_merged\_CHG.Chr19.18771801-18772000  
mytileDiff25p200.hypo\_merged\_CHG.Chr19.35049001-35049200  
mytileDiff25p200.hypo\_merged\_CHG.Chr19.35359001-35359200  
mytileDiff25p200.hypo\_merged\_CHG.Chr19.38192801-38193000  
mytileDiff25p200.hypo\_merged\_CHG.Chr19.38193201-38193400  
mytileDiff25p200.hypo\_merged\_CHG.Chr19.49349801-49350000  
mytileDiff25p200.hypo\_merged\_CHG.Chr19.49720801-49721000  
mytileDiff25p200.hypo\_merged\_CHG.Chr20.67401-67600  
mytileDiff25p200.hypo\_merged\_CHG.Chr20.744401-744600  
mytileDiff25p200.hypo\_merged\_CHG.Chr20.4143401-4143600  
mytileDiff25p200.hypo\_merged\_CHG.Chr20.8633801-8634000  
mytileDiff25p200.hypo\_merged\_CHG.Chr20.17716601-17716800  
mytileDiff25p200.hypo\_merged\_CHG.Chr20.17716601-17716800  
mytileDiff25p200.hypo\_merged\_CHG.Chr20.21543201-21543400  
mytileDiff25p200.hypo\_merged\_CHG.Chr20.25169801-25170000  
mytileDiff25p200.hypo\_merged\_CHG.Chr20.25316801-25317000  
mytileDiff25p200.hypo\_merged\_CHG.Chr20.37567401-37567600  
mytileDiff25p200.hypo\_merged\_CHG.Chr20.42417801-42418000  
mytileDiff25p200.hypo\_merged\_CHG.Chr20.42416801-42417000  
mytileDiff25p200.hypo\_merged\_CHG.Chr20.42417001-42417200  
mytileDiff25p200.hypo\_merged\_CHG.Chr20.43723401-43723600  
mytileDiff25p200.hypo\_merged\_CHG.Chr20.47739201-47739400  
mytileDiff25p200.hypo\_merged\_CHG.scaffold\_21.349201-349400

---

**4G context.**

| <b>REGION</b>                           | <b>GENE ID</b>  |
|-----------------------------------------|-----------------|
| 3'UTR(38bp)                             | Glyma.01G006800 |
| 3'UTR                                   | Glyma.01G021600 |
| GENE BODY                               | Glyma.01G074400 |
| GENE BODY                               | Glyma.01G074400 |
| GENE BODY                               | Glyma.01G074700 |
| PROMOTER (92bp); 5'UTR (108bp)          | Glyma.01G089000 |
| 5'UTR(171bp); GENE BODY (29bp)          | Glyma.01G089000 |
| GENE BODY                               | Glyma.01G093200 |
| GENE BODY                               | Glyma.01G102100 |
| GENE BODY                               | Glyma.01G102800 |
| 5'UTR                                   | Glyma.01G114500 |
| PROMOTER(60bp), 5'UTR(39bp); GENE BODY( | Glyma.01G117400 |
| GENE BODY                               | Glyma.01G117500 |
| PROMOTER                                | Glyma.01G120100 |
| PROMOTER                                | Glyma.01G120100 |
| PROMOTER                                | Glyma.01G120100 |
| 5'UTR(148bp); GENE BODY(52bp)           | Glyma.01G145600 |
| PROMOTER                                | Glyma.01G145700 |
| PROMOTER                                | Glyma.01G145800 |
| PROMOTER                                | Glyma.01G153600 |
| GENE BODY                               | Glyma.01G203000 |
| GENE BODY (169bp); 3'UTR(31bp)          | Glyma.01G243200 |
| 3'UTR(65bp)                             | Glyma.01G245100 |
| 3'UTR(58bp)                             | Glyma.02G012600 |
| GENE BODY                               | Glyma.02G098200 |
| GENE BODY                               | Glyma.02G112500 |
| PROMOTER                                | Glyma.02G129400 |
| PROMOTER                                | Glyma.02G129400 |
| PROMOTER                                | Glyma.02G138900 |
| PROMOTER                                | Glyma.02G138900 |
| 5'UTR(141bp); PROMOTER (59bp)           | Glyma.02G139000 |
| 5'UTR(110bp); GENE BODY (90bp)          | Glyma.02G139000 |
| 3'UTR                                   | Glyma.02G140700 |
| PROMOTER                                | Glyma.02G141900 |
| GENE BODY                               | Glyma.02G163200 |
| GENE BODY                               | Glyma.02G177900 |
| PROMOTER(100bp); GENE BODY(100bp)       | Glyma.02G180800 |
| PROMOTER                                | Glyma.02G190300 |
| 5'UTR(135bp); GENE BODY (65bp)          | Glyma.02G192300 |
| PROMOTER                                | Glyma.02G258100 |
| GENE BODY (78bp); 3'UTR(122bp)          | Glyma.02G277700 |

|                                  |                 |
|----------------------------------|-----------------|
| GENE BODY                        | Glyma.02G287400 |
| 3'UTR                            | Glyma.03G027100 |
| PROMOTER                         | Glyma.03G034100 |
| GENE BODY (119bp); 3'UTR(81bp)   | Glyma.03G047800 |
| GENE BODY                        | Glyma.03G051700 |
| GENE BODY                        | Glyma.03G057800 |
| GENE BODY                        | Glyma.03G060900 |
| 3'UTR(79bp)                      | Glyma.03G085700 |
| 5'UTR(76bp); PROMOTER(124bp)     | Glyma.03G092600 |
| GENE BODY                        | Glyma.03G105000 |
| PROMOTER                         | Glyma.03G114000 |
| GENE BODY                        | Glyma.03G133200 |
| 3'UTR(188bp)                     | Glyma.03G159000 |
| 5'UTR                            | Glyma.03G225700 |
| PROMOTER                         | Glyma.03G225800 |
| GENE BODY                        | Glyma.04G079800 |
| GENE BODY                        | Glyma.04G096100 |
| GENE BODY                        | Glyma.04G096100 |
| GENE BODY                        | Glyma.04G096900 |
| GENE BODY                        | Glyma.04G096900 |
| GENE BODY                        | Glyma.04G101100 |
| GENE BODY                        | Glyma.04G114800 |
| PROMOTER                         | Glyma.04G115000 |
| PROMOTER                         | Glyma.04G115800 |
| PROMOTER                         | Glyma.04G115800 |
| GENE BODY                        | Glyma.04G116200 |
| GENE BODY                        | Glyma.04G116700 |
| GENE BODY                        | Glyma.04G121500 |
| GENE BODY                        | Glyma.04G124800 |
| GENE BODY                        | Glyma.04G128600 |
| GENE BODY (34bp); 3'UTR(166bp)   | Glyma.04G139200 |
| GENE BODY                        | Glyma.04G146900 |
| GENE BODY                        | Glyma.04G155000 |
| GENE BODY                        | Glyma.04G158400 |
| GENE BODY (24bp); 3'UTR(176bp)   | Glyma.04G162400 |
| GENE BODY                        | Glyma.04G182900 |
| GENE BODY                        | Glyma.04G182900 |
| GENE BODY                        | Glyma.05G031900 |
| GENE BODY                        | Glyma.05G032600 |
| GENE BODY                        | Glyma.05G044500 |
| GENE BODY                        | Glyma.05G060200 |
| PROMOTER                         | Glyma.05G060700 |
| PROMOTER(92bp); GENE BODY(108bp) | Glyma.05G067200 |

|                                |                 |
|--------------------------------|-----------------|
| GENE BODY                      | Glyma.05G075400 |
| PROMOTER                       | Glyma.05G078500 |
| GENE BODY                      | Glyma.05G078600 |
| GENE BODY                      | Glyma.05G100500 |
| GENE BODY                      | Glyma.05G100500 |
| GENE BODY                      | Glyma.05G100500 |
| GENE BODY                      | Glyma.05G115200 |
| GENE BODY                      | Glyma.05G136600 |
| PROMOTER(26bp); 5'UTR(174bp)   | Glyma.05G236500 |
| GENE BODY                      | Glyma.06G067100 |
| PROMOTER                       | Glyma.06G090100 |
| 5'UTR(41bp); GENE BODY (159bp) | Glyma.06G090100 |
| GENE BODY                      | Glyma.06G108200 |
| GENE BODY                      | Glyma.06G115100 |
| GENE BODY                      | Glyma.06G173500 |
| GENE BODY                      | Glyma.06G185000 |
| GENE BODY                      | Glyma.06G195300 |
| 5'UTR(18bp); GENE BODY (182bp) | Glyma.06G195300 |
| 3'UTR                          | Glyma.06G197600 |
| GENE BODY                      | Glyma.06G202500 |
| GENE BODY                      | Glyma.06G205200 |
| GENE BODY                      | Glyma.06G214500 |
| GENE BODY                      | Glyma.06G214500 |
| GENE BODY                      | Glyma.06G218500 |
| GENE BODY                      | Glyma.06G218500 |
| GENE BODY                      | Glyma.06G228000 |
| GENE BODY                      | Glyma.06G228000 |
| GENE BODY                      | Glyma.06G238900 |
| PROMOTER                       | Glyma.06G243400 |
| GENE BODY                      | Glyma.06G243700 |
| GENE BODY                      | Glyma.06G261400 |
| GENE BODY                      | Glyma.06G271800 |
| PROMOTER                       | Glyma.06G289500 |
| PROMOTER(183bp); 5'UTR(17bp)   | Glyma.06G296500 |
| GENE BODY                      | Glyma.06G309800 |
| GENE BODY                      | Glyma.07G028100 |
| GENE BODY                      | Glyma.07G069500 |
| GENE BODY                      | Glyma.07G079000 |
| 3'UTR                          | Glyma.07G079100 |

|                                  |                 |
|----------------------------------|-----------------|
| PROMOTER(87bp); GENE BODY(113bp) | Glyma.07G079200 |
| PROMOTER                         | Glyma.07G079300 |
| GENE BODY                        | Glyma.07G101200 |
| GENE BODY                        | Glyma.07G113100 |
| GENE BODY (122bp); 3'UTR(78bp)   | Glyma.07G124500 |
| GENE BODY                        | Glyma.07G125300 |
| GENE BODY                        | Glyma.07G125300 |
| GENE BODY                        | Glyma.07G149900 |
| PROMOTER                         | Glyma.07G190600 |
| GENE BODY                        | Glyma.07G264000 |
| GENE BODY                        | Glyma.08G127200 |
| GENE BODY                        | Glyma.08G139300 |
| GENE BODY                        | Glyma.08G140100 |
| GENE BODY                        | Glyma.08G194600 |
| GENE BODY                        | Glyma.08G213900 |
| 5'UTR(37bp); PROMOTER(163bp)     | Glyma.08G233900 |
| 3'UTR (178bp); GENE BODY (22bp)  | Glyma.08G233900 |
| 3'UTR                            | Glyma.08G233900 |
| GENE BODY                        | Glyma.08G236400 |
| GENE BODY                        | Glyma.08G236700 |
| GENE BODY                        | Glyma.08G236700 |
| GENE BODY                        | Glyma.08G236700 |
| 5'UTR(156bp); GENE BODY (44bp)   | Glyma.08G238500 |
| GENE BODY                        | Glyma.08G253800 |
| GENE BODY                        | Glyma.08G264900 |
| GENE BODY                        | Glyma.08G265300 |
| GENE BODY (151bp); 3'UTR(49bp)   | Glyma.08G273000 |
| GENE BODY                        | Glyma.08G273000 |
| PROMOTER                         | Glyma.08G275100 |
| GENE BODY                        | Glyma.08G275100 |
| GENE BODY                        | Glyma.08G276200 |
| GENE BODY                        | Glyma.08G279100 |
| GENE BODY                        | Glyma.08G279800 |
| GENE BODY                        | Glyma.08G288100 |
| GENE BODY                        | Glyma.08G291800 |
| GENE BODY                        | Glyma.08G344800 |
| PROMOTER(191bp); 5'UTR(9bp)      | Glyma.08G357000 |
| 5'UTR(67bp); GENE BODY (133bp)   | Glyma.09G046700 |
| GENE BODY                        | Glyma.09G057400 |
| GENE BODY                        | Glyma.09G065300 |
| GENE BODY                        | Glyma.09G065300 |
| GENE BODY                        | Glyma.09G083800 |
| GENE BODY                        | Glyma.09G084300 |

|                                |                 |
|--------------------------------|-----------------|
| GENE BODY                      | Glyma.09G095400 |
| PROMOTER                       | Glyma.09G110200 |
| GENE BODY                      | Glyma.09G110300 |
| GENE BODY                      | Glyma.09G116800 |
| GENE BODY                      | Glyma.09G121300 |
| GENE BODY                      | Glyma.09G124400 |
| PROMOTER                       | Glyma.09G129600 |
| GENE BODY                      | Glyma.09G130900 |
| PROMOTER                       | Glyma.09G144900 |
| 3'UTR                          | Glyma.09G148100 |
| GENE BODY                      | Glyma.09G194400 |
| PROMOTER                       | Glyma.09G202900 |
| GENE BODY                      | Glyma.10G008300 |
| GENE BODY                      | Glyma.10G023300 |
| GENE BODY                      | Glyma.10G065800 |
| GENE BODY                      | Glyma.10G065900 |
| GENE BODY                      | Glyma.10G075900 |
| GENE BODY                      | Glyma.10G078900 |
| GENE BODY                      | Glyma.10G095200 |
| PROMOTER(171bp); 5'UTR(29bp)   | Glyma.10G098700 |
| GENE BODY                      | Glyma.10G104300 |
| GENE BODY                      | Glyma.10G108500 |
| GENE BODY                      | Glyma.10G111500 |
| GENE BODY                      | Glyma.10G118800 |
| GENE BODY                      | Glyma.10G123400 |
| GENE BODY                      | Glyma.10G123400 |
| GENE BODY                      | Glyma.10G159500 |
| GENE BODY                      | Glyma.10G202600 |
| PROMOTER                       | Glyma.10G229600 |
| 3'UTR(102bp)                   | Glyma.10G233300 |
| 3'UTR(8bp)                     | Glyma.10G246000 |
| 5'UTR(81bp); GENE BODY (119bp) | Glyma.10G294000 |
| GENE BODY                      | Glyma.10G298900 |
| GENE BODY                      | Glyma.11G037300 |
| GENE BODY                      | Glyma.11G256800 |
| GENE BODY                      | Glyma.12G051000 |
| GENE BODY                      | Glyma.12G096900 |
| PROMOTER                       | Glyma.12G117500 |
| GENE BODY                      | Glyma.12G133500 |

|                                  |                 |
|----------------------------------|-----------------|
| GENE BODY                        | Glyma.12G152300 |
| GENE BODY                        | Glyma.12G152700 |
| GENE BODY                        | Glyma.12G156200 |
| GENE BODY                        | Glyma.12G157800 |
| GENE BODY                        | Glyma.12G205500 |
| GENE BODY                        | Glyma.13G003500 |
| GENE BODY                        | Glyma.13G027100 |
| PROMOTER(107bp); GENE BODY(93bp) | Glyma.13G030000 |
| PROMOTER                         | Glyma.13G030000 |
| PROMOTER                         | Glyma.13G030100 |
| PROMOTER                         | Glyma.13G030100 |
| GENE BODY                        | Glyma.13G030600 |
| GENE BODY                        | Glyma.13G035200 |
| GENE BODY                        | Glyma.13G048300 |
| GENE BODY (166bp); 3'UTR (34bp)  | Glyma.13G059000 |
| PROMOTER                         | Glyma.13G062000 |
| GENE BODY                        | Glyma.13G078200 |
| GENE BODY                        | Glyma.13G156600 |
| PROMOTER                         | Glyma.13G156900 |
| GENE BODY                        | Glyma.13G166100 |
| GENE BODY                        | Glyma.13G174900 |
| GENE BODY                        | Glyma.13G184600 |
| GENE BODY                        | Glyma.13G233400 |
| 5'UTR(111bp); GENE BODY (89bp)   | Glyma.13G283900 |
| PROMOTER                         | Glyma.13G305700 |
| GENE BODY                        | Glyma.13G372400 |
| GENE BODY                        | Glyma.14G031300 |
| GENE BODY                        | Glyma.14G045600 |
| GENE BODY                        | Glyma.14G091400 |
| GENE BODY                        | Glyma.14G104400 |
| GENE BODY                        | Glyma.14G105100 |
| GENE BODY                        | Glyma.14G105100 |
| PROMOTER                         | Glyma.14G106300 |
| PROMOTER                         | Glyma.14G108800 |
| 5'UTR                            | Glyma.14G110800 |
| GENE BODY                        | Glyma.14G119200 |
| GENE BODY                        | Glyma.14G119200 |
| PROMOTER                         | Glyma.14G120000 |
| GENE BODY                        | Glyma.14G128300 |
| GENE BODY                        | Glyma.14G138900 |
| GENE BODY (130bp); 3'UTR (70bp)  | Glyma.14G140600 |
| GENE BODY                        | Glyma.14G142100 |
| GENE BODY                        | Glyma.14G145000 |



|                                         |                 |
|-----------------------------------------|-----------------|
| 5'UTR                                   | Glyma.14G150500 |
| PROMOTER (37bp); 5'UTR(122bp); GENE BOD | Glyma.14G159200 |
| GENE BODY                               | Glyma.14G160400 |
| 3'UTR(17bp)                             | Glyma.14G160400 |
| GENE BODY                               | Glyma.14G161200 |
| GENE BODY                               | Glyma.14G162300 |
| GENE BODY                               | Glyma.14G162300 |
| GENE BODY                               | Glyma.14G162300 |
| GENE BODY                               | Glyma.14G163000 |
| GENE BODY                               | Glyma.14G163000 |
| 5'UTR(117bp); GENE BODY (83bp)          | Glyma.14G163100 |
| GENE BODY                               | Glyma.14G164000 |
| GENE BODY                               | Glyma.14G164000 |
| 3'UTR                                   | Glyma.14G166700 |
| GENE BODY                               | Glyma.14G192900 |
| PROMOTER                                | Glyma.14G200800 |
| GENE BODY                               | Glyma.14G211800 |
| GENE BODY                               | Glyma.15G006900 |
| GENE BODY                               | Glyma.15G030400 |
| PROMOTER                                | Glyma.15G046800 |
| GENE BODY                               | Glyma.15G076300 |
| PROMOTER                                | Glyma.15G126100 |
| 3'UTR(67bp); GENE BODY (124bp)          | Glyma.15G126100 |
| GENE BODY                               | Glyma.15G127200 |
| PROMOTER(156bp); GENE BODY(44bp)        | Glyma.15G135300 |
| GENE BODY                               | Glyma.15G161200 |
| GENE BODY                               | Glyma.15G163200 |
| GENE BODY                               | Glyma.15G173900 |
| GENE BODY                               | Glyma.15G182000 |
| GENE BODY                               | Glyma.15G192300 |
| GENE BODY                               | Glyma.15G192300 |
| 5'UTR                                   | Glyma.15G197000 |
| GENE BODY                               | Glyma.15G204600 |
| GENE BODY                               | Glyma.15G204700 |
| GENE BODY                               | Glyma.15G212200 |
| GENE BODY                               | Glyma.15G213000 |
| GENE BODY                               | Glyma.15G213000 |

|                                        |                 |
|----------------------------------------|-----------------|
| GENE BODY                              | Glyma.15G213200 |
| 3'UTR                                  | Glyma.15G219300 |
| GENE BODY                              | Glyma.15G220900 |
| GENE BODY                              | Glyma.15G226200 |
| PROMOTER(16bp); 5'UTR(107bp); GENE BOD | Glyma.15G240300 |
| GENE BODY                              | Glyma.15G245300 |
| GENE BODY                              | Glyma.15G245300 |
| GENE BODY                              | Glyma.15G245300 |
| PROMOTER                               | Glyma.15G245400 |
| GENE BODY                              | Glyma.15G248600 |
| GENE BODY (173bp); 3'UTR(13bp)         | Glyma.15G252500 |
| GENE BODY                              | Glyma.16G053100 |
| PROMOTER                               | Glyma.16G056800 |
| 5'UTR(101bp); GENE BODY (99bp)         | Glyma.16G058000 |
| GENE BODY                              | Glyma.16G066900 |
| GENE BODY                              | Glyma.16G073700 |
| GENE BODY (145bp); 3'UTR(55bp)         | Glyma.16G088100 |
| GENE BODY                              | Glyma.16G091400 |
| GENE BODY (3bp); 3'UTR(197bp)          | Glyma.16G092800 |
| PROMOTER                               | Glyma.16G112800 |
| PROMOTER                               | Glyma.16G113800 |
| GENE BODY                              | Glyma.16G114200 |
| GENE BODY                              | Glyma.16G115200 |
| PROMOTER                               | Glyma.16G115300 |
| GENE BODY                              | Glyma.16G115700 |
| GENE BODY                              | Glyma.16G115700 |
| GENE BODY                              | Glyma.16G131100 |
| 5'UTR(54bp); GENE BODY (146bp)         | Glyma.16G136400 |
| GENE BODY                              | Glyma.16G148600 |
| PROMOTER                               | Glyma.16G159900 |
| 5'UTR                                  | Glyma.16G164700 |
| GENE BODY                              | Glyma.16G172300 |
| GENE BODY                              | Glyma.16G172400 |
| GENE BODY                              | Glyma.16G182700 |
| PROMOTER                               | Glyma.16G183300 |
| GENE BODY                              | Glyma.17G001100 |
| GENE BODY                              | Glyma.17G041900 |
| GENE BODY                              | Glyma.17G094300 |
| GENE BODY                              | Glyma.17G129900 |
| PROMOTER                               | Glyma.17G150300 |
| PROMOTER                               | Glyma.17G169200 |
| PROMOTER                               | Glyma.17G171400 |
| PROMOTER                               | Glyma.17G171400 |

|                                  |                 |
|----------------------------------|-----------------|
| GENE BODY                        | Glyma.17G171400 |
| GENE BODY                        | Glyma.17G173200 |
| GENE BODY                        | Glyma.17G183400 |
| PROMOTER(93bp); GENE BODY(107bp) | Glyma.17G190200 |
| PROMOTER(172bp); GENE BODY(28bp) | Glyma.17G191800 |
| GENE BODY                        | Glyma.17G204000 |
| PROMOTER                         | Glyma.17G205900 |
| PROMOTER(187bp); GENE BODY(13bp) | Glyma.17G206000 |
| GENE BODY                        | Glyma.17G206400 |
| PROMOTER                         | Glyma.17G207600 |
| GENE BODY                        | Glyma.17G212600 |
| GENE BODY                        | Glyma.17G222100 |
| GENE BODY                        | Glyma.17G222200 |
| PROMOTER                         | Glyma.17G235400 |
| GENE BODY                        | Glyma.17G235400 |
| GENE BODY                        | Glyma.18G000100 |
| GENE BODY                        | Glyma.18G000100 |
| GENE BODY                        | Glyma.18G004600 |
| GENE BODY                        | Glyma.18G019600 |
| GENE BODY                        | Glyma.18G087700 |
| GENE BODY                        | Glyma.18G093600 |
| GENE BODY                        | Glyma.18G109100 |
| GENE BODY                        | Glyma.18G109100 |
| 3'UTR                            | Glyma.18G119200 |
| GENE BODY (173bp); 3'UTR(27bp)   | Glyma.18G127700 |
| GENE BODY                        | Glyma.18G128900 |
| GENE BODY                        | Glyma.18G137700 |
| GENE BODY                        | Glyma.18G140800 |
| GENE BODY                        | Glyma.18G140800 |
| PROMOTER                         | Glyma.18G142600 |
| GENE BODY                        | Glyma.18G149700 |
| GENE BODY                        | Glyma.18G149700 |
| GENE BODY                        | Glyma.18G156300 |
| PROMOTER (127bp); 5'UTR(73bp)    | Glyma.18G157300 |
| GENE BODY                        | Glyma.18G162500 |
| GENE BODY                        | Glyma.18G166600 |
| GENE BODY                        | Glyma.18G166600 |
| PROMOTER                         | Glyma.18G171700 |
| GENE BODY                        | Glyma.18G195000 |
| GENE BODY                        | Glyma.18G199800 |

|                                 |                 |
|---------------------------------|-----------------|
| GENE BODY                       | Glyma.18G241400 |
| GENE BODY                       | Glyma.18G241400 |
| GENE BODY                       | Glyma.18G279600 |
| GENE BODY                       | Glyma.18G297900 |
| PROMOTER                        | Glyma.19G003900 |
| PROMOTER                        | Glyma.19G024600 |
| PROMOTER                        | Glyma.19G031100 |
| PROMOTER(3bp); GENE BODY(197bp) | Glyma.19G043600 |
| GENE BODY                       | Glyma.19G043600 |
| GENE BODY                       | Glyma.19G043600 |
| GENE BODY                       | Glyma.19G056700 |
| 3'UTR(44bp); GENE BODY(9bp)     | Glyma.19G059600 |
| GENE BODY                       | Glyma.19G060900 |
| GENE BODY                       | Glyma.19G060900 |
| GENE BODY                       | Glyma.19G061900 |
| GENE BODY                       | Glyma.19G066800 |
| GENE BODY                       | Glyma.19G067100 |
| GENE BODY                       | Glyma.19G102500 |
| GENE BODY                       | Glyma.19G104300 |
| 3'UTR                           | Glyma.19G124000 |
| 3'UTR                           | Glyma.19G124000 |
| GENE BODY                       | Glyma.19G247000 |
| GENE BODY                       | Glyma.19G251400 |
| GENE BODY                       | Glyma.20G000700 |
| PROMOTER                        | Glyma.20G008000 |
| GENE BODY                       | Glyma.20G032200 |
| PROMOTER                        | Glyma.20G046500 |
| GENE BODY                       | Glyma.20G058500 |
| 3'UTR                           | Glyma.20G058600 |
| GENE BODY                       | Glyma.20G064100 |
| GENE BODY                       | Glyma.20G070800 |
| GENE BODY                       | Glyma.20G071200 |
| 3'UTR                           | Glyma.20G135900 |
| GENE BODY                       | Glyma.20G185600 |
| GENE BODY                       | Glyma.20G185600 |
| GENE BODY                       | Glyma.20G185600 |
| GENE BODY                       | Glyma.20G199500 |
| GENE BODY                       | Glyma.20G248000 |
| GENE BODY                       | Glyma.U010800   |

---

| <b>GENE ANNOTATION</b>                        | <b>% Methylation Differences</b> | <b>q value</b> |
|-----------------------------------------------|----------------------------------|----------------|
| Pectin lyase-like superfamily protein         | -40.53030303                     | 2.77707E-05    |
| N/A                                           | -37.25490196                     | 0.000219161    |
| N/A                                           | -37.52631579                     | 0.000734571    |
| N/A                                           | -39.40813073                     | 8.69842E-08    |
| Nucleoporin autopeptidase                     | -34.84341382                     | 0.00106169     |
| Nucleic acid-binding, OB-fold-like protein    | -28.57142857                     | 0.001233443    |
| Nucleic acid-binding, OB-fold-like protein    | -27.27272727                     | 9.31835E-09    |
| Metal-dependent phosphohydrolase              | -38.18272095                     | 0.001021096    |
| Protein of unknown function (DUF604)          | -61.33587786                     | 0.000212198    |
| N/A                                           | -84.65909091                     | 0.000157021    |
| glucose-6-phosphate/phosphate translocator    | -33.24863884                     | 0.000422084    |
| STAS domain / Sulfate transporter family      | -28.35820896                     | 0.005104314    |
| TBP-associated factor 15                      | -27.77777778                     | 0.006638408    |
| receptor like protein 6                       | -60.28514589                     | 9.08552E-22    |
| receptor like protein 6                       | -73.07692308                     | 0.00012701     |
| receptor like protein 6                       | -32.25806452                     | 2.10036E-06    |
| N/A                                           | -25.33960293                     | 0.004282959    |
| RNA-binding (RRM/RBD/RNP motifs) family p     | -27.53623188                     | 0.000213257    |
| protein binding                               | -27.53623188                     | 0.000213257    |
| xyloglucanase 113                             | -51.94424065                     | 0.003368248    |
| N/A                                           | -35.10278428                     | 0.000804136    |
| somatic embryogenesis receptor-like kinase :  | -67.89772727                     | 0.000395776    |
| histone deacetylase 1                         | -71.21212121                     | 0.006813334    |
| Concanavalin A-like lectin protein kinase fam | -28.09237583                     | 0.004623602    |
| Transmembrane amino acid transporter fami     | -26.86567164                     | 0.002172447    |
| Transducin/WD40 repeat-like superfamily pr    | -30.14090259                     | 0.007160035    |
| N/A                                           | -37.66039029                     | 8.71878E-13    |
| N/A                                           | -28.21081358                     | 1.4755E-05     |
| N/A                                           | -37.26133076                     | 0.002967841    |
| N/A                                           | -25.89996814                     | 6.28127E-07    |
| N/A                                           | -37.26133076                     | 0.002967841    |
| N/A                                           | -25.89996814                     | 6.28127E-07    |
| N/A                                           | -92.30769231                     | 0.004021801    |
| alpha/beta-Hydrolases superfamily protein     | -64.17910448                     | 1.39619E-13    |
| P-loop containing nucleoside triphosphate h   | -26.67390125                     | 0.001742711    |
| NIMA-related kinase 2                         | -55.44715447                     | 2.5401E-05     |
| homeobox protein 22                           | -43.81377551                     | 0.004526603    |
| Nucleic acid-binding, OB-fold-like protein    | -90.69767442                     | 7.37599E-05    |
| RING-H2 group F2A                             | -38.23529412                     | 5.94643E-06    |
| E3 ubiquitin ligase, putative                 | -85.65217391                     | 0.001513714    |
| early nodulin-like protein 18                 | -76.92307692                     | 1.5835E-06     |

|                                                 |              |             |
|-------------------------------------------------|--------------|-------------|
| protodermal factor 1                            | -33.63095238 | 0.009357303 |
| N/A                                             | -38.7755102  | 0.003689797 |
| Preprotein translocase Sec, Sec61-beta subu     | -27.04100677 | 0.00032695  |
| P-loop containing nucleoside triphosphate h     | -30.64516129 | 1.29933E-08 |
| N/A                                             | -45.11241447 | 0.00938922  |
| Rhodanese/Cell cycle control phosphatase su     | -72.72727273 | 0.008355196 |
| BCL-2-associated athanogene 6                   | -46.66666667 | 0.00495282  |
| Protein kinase superfamily protein              | -46.2962963  | 0.003213284 |
| Chloroplast Ycf2;ATPase, AAA type, coreMET      | -38.07950192 | 1.23977E-10 |
| basic helix-loop-helix (bHLH) DNA-binding su    | -67.9791546  | 0.003976657 |
| N/A                                             | -27.47092057 | 0.003932664 |
| Transmembrane proteins 14C                      | -31.66410601 | 0.000111168 |
| alpha/beta-Hydrolases superfamily protein       | -66.95116169 | 5.19212E-05 |
| N/A                                             | -39.04761905 | 5.12743E-08 |
| Protein phosphatase 2C family protein           | -39.04761905 | 5.12743E-08 |
| Ribosomal protein S5 family protein             | -28.40153195 | 3.81865E-05 |
| binding                                         | -39.00069396 | 0.001134112 |
| binding                                         | -29.67687075 | 2.53661E-09 |
| ubiquitin-protein ligase 1                      | -33.9569161  | 3.89002E-07 |
| ubiquitin-protein ligase 1                      | -31.55011655 | 0.000144838 |
| APR-like 4                                      | -31.41928494 | 0.001524982 |
| chloride channel F                              | -25.90340208 | 0.009080022 |
| N/A                                             | -25.90340208 | 0.009080022 |
| Ribosomal L32p protein family                   | -52.50982104 | 1.46832E-06 |
| Ribosomal L32p protein family                   | -28.125      | 6.85703E-07 |
| N/A                                             | -38.26815642 | 3.14448E-08 |
| peroxin 5                                       | -37.35930736 | 0.004282959 |
| Phosphoinositide phosphatase family proteir     | -47.64079148 | 1.69031E-05 |
| zinc induced facilitator-like 1                 | -31.75501801 | 1.34583E-07 |
| alpha/beta-Hydrolases superfamily protein       | -57.44047619 | 0.000510142 |
| ribosomal protein large subunit 27              | -67.72727273 | 0.003020605 |
| nucleoporin-related                             | -41.66666667 | 0.005157159 |
| Family of unknown function (DUF566)             | -48.40654608 | 0.009401203 |
| transducin family protein / WD-40 repeat far    | -72.72727273 | 0.008355196 |
| exocyst subunit exo70 family protein E2         | -38.7477314  | 0.003825746 |
| ataxia-telangiectasia mutated                   | -39.3258427  | 6.2256E-05  |
| ataxia-telangiectasia mutated                   | -64.61038961 | 0.002251172 |
| ARM repeat superfamily protein                  | -30.99415205 | 0.004700162 |
| ARM repeat superfamily protein                  | -27.83018868 | 3.76748E-13 |
| 26S proteasome, regulatory subunit Rpn7;Pr      | -36.86046512 | 0.003350142 |
| O-fucosyltransferase family protein             | -44.29123001 | 0.008480288 |
| plant glycogenin-like starch initiation protein | -33.19284802 | 0.004921377 |
| Histone H3 K4-specific methyltransferase SE1    | -39.09905426 | 0.008616815 |

|                                                |              |             |
|------------------------------------------------|--------------|-------------|
| Proteasome component (PCI) domain protein      | -30.47504026 | 0.003248343 |
| PIF1 helicase                                  | -70.625      | 0.001759016 |
| N/A                                            | -70.625      | 0.001759016 |
| WD-40 repeat family protein                    | -31.43079662 | 0.00015733  |
| WD-40 repeat family protein                    | -27.53211629 | 0.000429667 |
| WD-40 repeat family protein                    | -37.54813864 | 0.004517985 |
| Pentatricopeptide repeat (PPR) superfamily p   | -30.07493644 | 0.000112224 |
| N/A                                            | -38.95877009 | 0.000971663 |
| RNA-binding CRS1 / YhbY (CRM) domain prot      | -29.36425339 | 2.45546E-15 |
| RNA-binding CRS1 / YhbY (CRM) domain prot      | -37.54696726 | 2.99552E-14 |
| RNA-binding CRS1 / YhbY (CRM) domain prot      | -35.69601754 | 0.005428867 |
| RNA-binding CRS1 / YhbY (CRM) domain prot      | -38.21656051 | 9.62756E-14 |
| RNA-binding CRS1 / YhbY (CRM) domain prot      | -42.23602484 | 6.51509E-18 |
| Phox (PX) domain-containing protein            | -79.6347032  | 8.97856E-06 |
| RNA-binding KH domain-containing protein       | -25.19900498 | 0.009582246 |
| RNA-binding KH domain-containing protein       | -28.33333333 | 0.000548443 |
| Vacuolar sorting protein 9 (VPS9) domain       | -25.83900227 | 8.24282E-07 |
| IAA-leucine resistant (ILR)-like gene 6        | -50.25031289 | 0.000491077 |
| glucan synthase-like 8                         | -54.08163265 | 6.45425E-05 |
| GATA type zinc finger transcription factor far | -58.90410959 | 0.000675074 |
| Protein of unknown function (DUF962)           | -27.84810127 | 5.06925E-19 |
| Protein of unknown function (DUF962)           | -43.24324324 | 0.000311801 |
| Leucine-rich repeat protein kinase family pro  | -25.44489093 | 0.000741281 |
| U5 small nuclear ribonucleoprotein helicase    | -33.76344086 | 0.004529719 |
| P-loop containing nucleoside triphosphate h    | -44.68085106 | 0.000962609 |
| Protein of unknown function (DUF803)           | -28.29226848 | 0.002182126 |
| Protein of unknown function (DUF803)           | -31.12582781 | 4.65625E-06 |
| Nucleotide/sugar transporter family protein    | -52.94117647 | 0.001082744 |
| Nucleotide/sugar transporter family protein    | -47.31182796 | 3.20327E-06 |
| DNAJ heat shock family protein                 | -36.80981595 | 2.99385E-06 |
| DNAJ heat shock family protein                 | -26.41134557 | 4.65395E-05 |
| 3-hydroxyacyl-CoA dehydrogenase family pro     | -41.69398907 | 0.000591822 |
| pleiotropic drug resistance 12                 | -31.68119099 | 0.005614165 |
| Galactose oxidase/kelch repeat superfamily p   | -31.1789905  | 0.002371301 |
| disease resistance protein (TIR-NBS-LRR class  | -51.26705653 | 0.000192914 |
| N/A                                            | -39.09294155 | 0.009285204 |
| N/A                                            | -44.44444444 | 0.004415854 |
| Auxin-responsive GH3 family protein            | -48.47094801 | 2.71881E-07 |
| TBP-associated factor 7                        | -73.51916376 | 0.000788288 |
| CemA-like proton extrusion protein-related     | -28.38350377 | 0.002603975 |
| cytochrome P450, family 86, subfamily A, po    | -62.5        | 8.96604E-08 |
| response regulator 2                           | -26.20155039 | 0.005708866 |
| N/A                                            | -26.20155039 | 0.005708866 |

|                                                |              |             |
|------------------------------------------------|--------------|-------------|
| N/A                                            | -26.20155039 | 0.005708866 |
| N/A                                            | -26.20155039 | 0.005708866 |
| BED zinc finger ;hAT family dimerisation dom   | -38.56008055 | 3.75717E-09 |
| Auxin efflux carrier family protein            | -74.28571429 | 0.001547796 |
| hexokinase 1                                   | -28.7012987  | 0.009138996 |
| nuclear RNA polymerase C2                      | -34.12277378 | 0.001057295 |
| nuclear RNA polymerase C2                      | -27.14449601 | 1.17287E-08 |
| LMBR1-like membrane protein                    | -28.92466935 | 0.001049893 |
| Transducin/WD40 repeat-like superfamily pr     | -40          | 0.001455577 |
| ZCW7                                           | -31.72774869 | 0.001509362 |
| UDP-glucose:glycoprotein glucosyltransferas    | -27.41779497 | 0.002902342 |
| binding                                        | -41.3372093  | 0.008379863 |
| bZIP transcription factor family protein       | -34.48275862 | 0.004920032 |
| multidrug resistance-associated protein 6      | -76.81818182 | 0.007707273 |
| alpha/beta-Hydrolases superfamily protein      | -59.83333333 | 9.62541E-05 |
| Pentatricopeptide repeat (PPR) superfamily p   | -41.22807018 | 8.19788E-11 |
| Pentatricopeptide repeat (PPR) superfamily p   | -38.88888889 | 9.90426E-06 |
| Pentatricopeptide repeat (PPR) superfamily p   | -36.92307692 | 5.94833E-05 |
| GTP-binding protein-related                    | -72.36842105 | 0.004811332 |
| Topoisomerase II-associated protein PAT1       | -44.0885265  | 2.39163E-10 |
| Topoisomerase II-associated protein PAT1       | -41.94444444 | 0.000314104 |
| Topoisomerase II-associated protein PAT1       | -54.28571429 | 1.09852E-07 |
| SPLa/Ryanodine receptor (SPRY) domain-con      | -38.13559322 | 0.002997114 |
| DNA/RNA polymerases superfamily protein        | -26.84620344 | 0.002697389 |
| phototropin 2                                  | -73.70689655 | 0.001134112 |
| RNA recognition motif (RRM)-containing prot    | -39.73888209 | 6.70594E-06 |
| N/A                                            | -49.82275218 | 2.87662E-08 |
| N/A                                            | -42.55319149 | 0.000916451 |
| Concanavalin A-like lectin protein kinase fam  | -32.43243243 | 0.008862698 |
| Concanavalin A-like lectin protein kinase fam  | -44.44444444 | 0.000222668 |
| N/A                                            | -33.95061728 | 3.28415E-14 |
| Xanthine/uracil permease family protein        | -25.41193182 | 0.007072412 |
| kinesin like protein for actin based chloropla | -26.28332232 | 0.000917646 |
| spermidine synthase 1                          | -47.53623188 | 0.000354228 |
| pentatricopeptide (PPR) repeat-containing p    | -57.26273726 | 4.1663E-08  |
| N/A                                            | -28.20048309 | 0.000167035 |
| RINT-1 / TIP-1 family                          | -64.23537703 | 5.03038E-08 |
| N/A                                            | -29.54545455 | 0.000135885 |
| villin 4                                       | -36.42512077 | 0.004992772 |
| membrane bound O-acyl transferase (MBOA        | -31.22129989 | 1.6685E-05  |
| membrane bound O-acyl transferase (MBOA        | -27.91871766 | 0.000160042 |
| VPS54                                          | -31.74369542 | 0.001876515 |
| Outer arm dynein light chain 1 protein         | -45.35857299 | 0.003115914 |



|                                                 |              |             |
|-------------------------------------------------|--------------|-------------|
| Cyclophilin-like peptidyl-prolyl cis-trans isom | -26.93346842 | 0.000586742 |
| PYRIMIDINE B                                    | -46.04166667 | 0.003441086 |
| P-loop containing nucleoside triphosphate h     | -46.04166667 | 0.003441086 |
| Chaperone DnaJ-domain superfamily protein       | -93.33333333 | 0.001063149 |
| Protein kinase superfamily protein              | -36.15384615 | 0.00572838  |
| Caleosin-related family protein                 | -43.47670251 | 0.003425268 |
| DNA primases                                    | -50.78039927 | 0.00034223  |
| Heavy metal transport/detoxification superfa    | -39.61916462 | 6.46745E-07 |
| 2-oxoglutarate (2OG) and Fe(II)-dependent o     | -76.19047619 | 0.000297757 |
| GroES-like zinc-binding alcohol dehydrogena:    | -27.08616011 | 1.52214E-05 |
| sugar transporter 14                            | -37.35909823 | 0.000920785 |
| Glycosyl hydrolase family protein               | -31.47239086 | 2.69086E-06 |
| Target SNARE coiled-coil domain protein         | -33.95566922 | 0.001277483 |
| Protein kinase family protein                   | -34.84617728 | 0.002748854 |
| Folypolyglutamate synthetase family proteir     | -40.875      | 0.006649015 |
| demeter-like 1                                  | -26.81218851 | 0.005410003 |
| LETM1-like protein                              | -28.125      | 0.005116276 |
| ribosomal protein L2                            | -29.20458787 | 2.64846E-13 |
| nuclear RNA polymerase A1                       | -35.78646934 | 7.35679E-14 |
| nuclear RNA polymerase A1                       | -29.05525847 | 0.004191551 |
| nuclear RNA polymerase A1                       | -34.44770563 | 4.07335E-12 |
| nuclear RNA polymerase A1                       | -28.44001897 | 0.00016537  |
| nuclear RNA polymerase A1                       | -39.69639932 | 4.62287E-14 |
| N/A                                             | -36.32607705 | 4.36783E-19 |
| SERINE CARBOXYPEPTIDASE-LIKE 49                 | -29.50208706 | 0.001832074 |
| Ran BP2/NZF zinc finger-like superfamily proi   | -58.33333333 | 7.37312E-34 |
| Leucine-rich repeat protein kinase family pro   | -78.4591195  | 0.000362188 |
| VEFS-Box of polycomb protein                    | -26.87598116 | 0.007958909 |
| P-loop containing nucleoside triphosphate h     | -53.31991952 | 0.008189209 |
| P-loop containing nucleoside triphosphate h     | -28.59459459 | 0.002241335 |
| ARM repeat superfamily protein                  | -44.12818471 | 0.001741729 |
| N/A                                             | -100         | 0.001061922 |
| VIRB2-interacting protein 1                     | -50.71895425 | 0.004230545 |
| N/A                                             | -38.59649123 | 8.94899E-07 |
| CVP2 like 1                                     | -45.8781362  | 0.003782564 |
| HMG (high mobility group) box protein with ,    | -59.84848485 | 0.003294694 |
| hydroxyproline-rich glycoprotein family prote   | -27.43589744 | 0.004578929 |
| N/A                                             | -45          | 0.001968856 |
| RNA polymerase II transcription mediators       | -28.8003663  | 0.005714746 |
| RNA binding                                     | -33.88648389 | 4.42115E-06 |
| cellulose synthase-like B3                      | -76          | 0.004139529 |
| N/A                                             | -44.83333333 | 0.006177282 |
| Protein kinase superfamily protein              | -33.33333333 | 0.000800279 |

|                                                |              |             |
|------------------------------------------------|--------------|-------------|
| cyclic nucleotide gated channel 5              | -29.16121801 | 0.005269453 |
| Domain of unknown function (DUF3598)           | -34.46691176 | 0.008463618 |
| Uncharacterised BCR, YbaB family COG0718       | -32.99284985 | 0.000136801 |
| N/A                                            | -26.19047619 | 0.005289772 |
| RING 1A                                        | -27.56699755 | 3.10227E-05 |
| disease resistance family protein / LRR family | -25.92592593 | 0.003959094 |
| N/A                                            | -47.50957854 | 0.005208049 |
| N/A                                            | -45.3125     | 1.15695E-08 |
| N/A                                            | -55.93220339 | 1.16646E-06 |
| high mobility group B2                         | -55.93220339 | 1.16646E-06 |
| high mobility group B2                         | -45.3125     | 1.15695E-08 |
| P-loop containing nucleoside triphosphate h    | -86.36363636 | 0.000920785 |
| alcohol dehydrogenase 1                        | -27.64204545 | 9.8674E-06  |
| N/A                                            | -29          | 1.63281E-08 |
| N/A                                            | -64.19753086 | 3.18591E-09 |
| NAC domain containing protein 100              | -33.26367119 | 0.001049893 |
| Disease resistance protein (TIR-NBS-LRR clas   | -36.28318584 | 2.24047E-09 |
| Protein of unknown function (DUF1336)          | -40.39316975 | 0.00032109  |
| D111/G-patch domain-containing protein         | -39.57875458 | 0.000160123 |
| Protein kinase superfamily protein             | -29.95126706 | 0.000577716 |
| HAESA-like 1                                   | -30.15777309 | 0.000246278 |
| N/A                                            | -57.44444444 | 0.003594702 |
| glutamate receptor 2.7                         | -34.50292398 | 0.004743378 |
| BURP domain-containing protein                 | -80.71428571 | 0.001273263 |
| Receptor-like protein kinase-related family p  | -44.68085106 | 3.66052E-05 |
| autoinhibited Ca(2+)-ATPase 9                  | -53.48837209 | 4.74737E-05 |
| NPR1-like protein 3                            | -32.05808081 | 0.003347015 |
| RNA-binding KH domain-containing protein       | -41.51747656 | 0.005278573 |
| Pseudouridine synthase family protein          | -36.88311688 | 0.009989518 |
| Peroxidase superfamily protein                 | -28.23335021 | 3.627E-12   |
| ARF-GAP domain 15                              | -41.81818182 | 6.42181E-10 |
| ARF-GAP domain 15                              | -48.55072464 | 5.47955E-05 |
| N/A                                            | -31.12033195 | 2.59439E-15 |
| N/A                                            | -47.5        | 0.000950387 |
| delta1-pyrroline-5-carboxylate synthase 1      | -38.46153846 | 0.005037736 |
| Polynucleotidyl transferase, ribonuclease H-I  | -31.93582649 | 3.16895E-06 |
| Polynucleotidyl transferase, ribonuclease H-I  | -27.12943275 | 1.27598E-07 |
| Protein of unknown function, DUF593            | -25.33125    | 0.00559587  |
| LisH dimerisation motif;WD40/YVTN repeat-I     | -66.66666667 | 0.000865438 |
| Ribosomal protein L14                          | -40.93406593 | 0.001023852 |
| bromo-adjacent homology (BAH) domain-cor       | -33.67256637 | 0.004803448 |
| signal peptide peptidase                       | -55.53359684 | 0.006171873 |
| appr-1-p processing enzyme family protein      | -72.70114943 | 0.001833685 |

|                                              |              |             |
|----------------------------------------------|--------------|-------------|
| N/A                                          | -58.01838611 | 0.005049871 |
| Tetratricopeptide repeat (TPR)-like superfam | -46.31578947 | 3.05399E-12 |
| N/A                                          | -37.28813559 | 3.41544E-10 |
| N/A                                          | -53.84615385 | 0.000498983 |
| DNAJ heat shock N-terminal domain-containi   | -77.71929825 | 0.000281029 |
| NADH-dependent glutamate synthase 1          | -34.93150685 | 5.21247E-07 |
| NADH-dependent glutamate synthase 1          | -63.63636364 | 2.02431E-10 |
| NADH-dependent glutamate synthase 1          | -34.48275862 | 0.009612209 |
| Ribonuclease II/R family protein             | -28.82675439 | 1.87289E-08 |
| Ribonuclease II/R family protein             | -31.01265823 | 9.38846E-13 |
| N/A                                          | -33.63248967 | 0.000114373 |
| N/A                                          | -33.36627141 | 3.55252E-11 |
| N/A                                          | -32.74336283 | 1.12545E-09 |
| N/AMETHYLATED_REGION                         | -46.35897436 | 0.005869797 |
| RNA recognition motif (RRM)-containing prot  | -28.70286576 | 0.005958211 |
| O-methyltransferase family protein           | -47.22222222 | 0.003166326 |
| N/A                                          | -49.74025974 | 0.000107393 |
| Molecular chaperone Hsp40/DnaJ family pro    | -29.75743936 | 0.000404024 |
| ARM repeat superfamily protein               | -26.02739726 | 0.003444049 |
| emp24/gp25L/p24 family/GOLD family prote     | -34.30499325 | 0.005547905 |
| protease-related                             | -25.10712894 | 0.001119278 |
| PSAJ                                         | -37.86163522 | 2.68576E-11 |
| PSAJ                                         | -81.77777778 | 2.8487E-23  |
| NPR1-like protein 3                          | -44.96551724 | 0.009341857 |
| Ubiquitin carboxyl-terminal hydrolase family | -66.15384615 | 5.61302E-05 |
| Protein kinase superfamily protein           | -35.87301587 | 0.003911856 |
| N/A                                          | -27.08333333 | 0.004710357 |
| N/A                                          | -35.67176871 | 0.003042672 |
| Riboflavin synthase-like superfamily protein | -42.52960443 | 2.2436E-13  |
| Riboflavin synthase-like superfamily protein | -36.14457831 | 3.64193E-07 |
| Riboflavin synthase-like superfamily protein | -28.49162011 | 1.01598E-09 |
| Riboflavin synthase-like superfamily protein | -29.92989452 | 1.10901E-16 |
| VPS54                                        | -57.28669846 | 8.48188E-05 |
| VPS54                                        | -69.56521739 | 0.000453169 |
| Pentatricopeptide repeat (PPR) superfamily p | -33.33333333 | 0.000329424 |
| XH/XS domain-containing protein              | -28.57603612 | 0.000566192 |
| XH/XS domain-containing protein              | -27.10341144 | 9.17156E-06 |
| XH/XS domain-containing protein              | -27.22359532 | 3.5589E-09  |
| XH/XS domain-containing protein              | -42.28221788 | 3.5242E-08  |
| XH/XS domain-containing protein              | -30.92497869 | 6.32629E-06 |
| N/A                                          | -48.33333333 | 6.53496E-05 |
| myosin 2                                     | -33.49078885 | 4.2188E-06  |
| myosin 2                                     | -35.48412144 | 2.53041E-06 |

|                                                      |              |             |
|------------------------------------------------------|--------------|-------------|
| cyclophilin 59                                       | -27.96296296 | 0.007251536 |
| Ca(2)-dependent phospholipid-binding prote           | -62.78801843 | 0.001061922 |
| long-chain acyl-CoA synthetase 7                     | -31.89655172 | 0.004169739 |
| beta galactosidase 9                                 | -29.52586207 | 0.001981666 |
| N/A                                                  | -33.33333333 | 1.00118E-05 |
| cytochrome P450, family 72, subfamily A, po          | -28.16901408 | 0.006782381 |
| cytochrome P450, family 72, subfamily A, po          | -46.66877838 | 9.92563E-11 |
| cytochrome P450, family 72, subfamily A, po          | -35.9375     | 0.006953375 |
| Ribosomal protein L18ae family                       | -27.55102041 | 0.000917646 |
| photosystem II reaction center protein K pre         | -29.04692082 | 0.004195621 |
| glutathione S-transferase TAU 20                     | -41.74962293 | 0.000583123 |
| N/A                                                  | -39.40985246 | 0.004639193 |
| N/A                                                  | -41.74174174 | 3.0417E-05  |
| Alpha-L RNA-binding motif/Ribosomal protei           | -88.46153846 | 0.00085171  |
| GDSL-motif lipase 5                                  | -50          | 0.009924873 |
| Uncharacterised protein family (UPF0497)             | -35.56231003 | 0.009235795 |
| N/A                                                  | -30.6981982  | 0.000398413 |
| male gametophyte defective 3                         | -62.82051282 | 0.008480288 |
| Ribosomal protein L13 family protein                 | -53.11594203 | 0.00839767  |
| RNA polymerase I specific transcription initia       | -28.0377735  | 5.82596E-09 |
| Glucose-6-phosphate/phosphate translocato            | -40.95238095 | 0.001045479 |
| Subtilase family protein                             | -48.71794872 | 0.009904325 |
| ATPase, FO complex, subunit B/B\', bacterial/        | -49.24242424 | 0.009083579 |
| ATP synthase subunit alpha                           | -49.24242424 | 0.009083579 |
| diacylglycerol acyltransferase family                | -26.4203985  | 0.003476223 |
| diacylglycerol acyltransferase family                | -28.4376672  | 0.00164362  |
| Protein of unknown function (DUF1640)                | -52.59259259 | 0.008333981 |
| N/A                                                  | -50          | 0.009301166 |
| nudix hydrolase homolog 12                           | -31.89908683 | 0.003007079 |
| HSP20-like chaperones superfamily protein            | -42.15180545 | 0.000143484 |
| Protein Transporter, Pam16                           | -56.15989515 | 1.16384E-12 |
| disease resistance family protein / LRR family       | -36.87641723 | 0.000330287 |
| multidrug resistance-associated protein 14           | -52.50965251 | 0.004811332 |
| disease resistance family protein / LRR family       | -45.69892473 | 0.003522876 |
| disease resistance family protein / LRR family       | -28.73176207 | 0.008465582 |
| RNA helicase family protein                          | -25.56536866 | 0.003871064 |
| N/A                                                  | -75.65217391 | 0.008144325 |
| plastid transcriptionally active 2                   | -29.71264368 | 0.000459098 |
| N/A                                                  | -33.51648352 | 2.63621E-10 |
| nicotinate/nicotinamide mononucleotide ad            | -25.20325203 | 5.1489E-05  |
| Protein of unknown function (DUF579)                 | -50.5952381  | 0.009051124 |
| kinase interacting (KIP1-like) family protein        | -27.95698925 | 0.004582646 |
| <b>kinase interacting (KIP1-like) family protein</b> | -45.04504505 | 0.005209895 |

|                                               |              |             |
|-----------------------------------------------|--------------|-------------|
| kinase interacting (KIP1-like) family protein | -48.60022396 | 8.54617E-09 |
| kinase interacting (KIP1-like) family protein | -27.43362832 | 3.66749E-07 |
| kinase interacting (KIP1-like) family protein | -29.14107918 | 2.29193E-11 |
| kinase interacting (KIP1-like) family protein | -31.68316832 | 2.4918E-14  |
| dihydroflavonol 4-reductase                   | -25.46583851 | 1.48802E-06 |
| nuclear RNA polymerase A2                     | -41.88311688 | 0.00866945  |
| Tetratricopeptide repeat (TPR)-like superfam  | -31.05126269 | 3.89002E-07 |
| N/A                                           | -27.63157895 | 7.61226E-05 |
| embryo defective 2410                         | -77.64705882 | 0.000691311 |
| CBS domain-containing protein with a domai    | -60.74766355 | 0.009828008 |
| ankyrin repeat protein                        | -60.74766355 | 0.009828008 |
| HXXXD-type acyl-transferase family protein    | -37.93103448 | 0.002590829 |
| N/A                                           | -32.81509121 | 0.003397932 |
| IQ-domain 19                                  | -25.12820513 | 1.26675E-05 |
| N/A                                           | -52.60869565 | 0.006301595 |
| TBP-associated factor 5                       | -33.67412828 | 0.000148109 |
| Protein of unknown function (DUF1218)         | -26.78014865 | 0.006430787 |
| Protein of unknown function (DUF1218)         | -54.65116279 | 3.93644E-10 |
| RNA polymerase II transcription mediators     | -32.50547345 | 0.000538326 |
| RNA polymerase II transcription mediators     | -28.15100579 | 0.002276985 |
| ferritin 4                                    | -37.33333333 | 4.57306E-06 |
| binding                                       | -25.24312896 | 0.001956084 |
| NB-ARC domain-containing disease resistanc    | -25.98690409 | 6.2445E-05  |
| NB-ARC domain-containing disease resistanc    | -32.46753247 | 0.000811469 |
| glucan synthase-like 7                        | -35.84507042 | 9.72511E-05 |
| glucan synthase-like 7                        | -46.96969697 | 5.90648E-05 |
| N/A                                           | -61.29411765 | 0.00161732  |
| alpha/beta-Hydrolases superfamily protein     | -33.30827068 | 3.13055E-05 |
| aminophospholipid ATPase 3                    | -29.48606272 | 0.000713932 |
| UB-like protease 1D                           | -85.71428571 | 0.000743599 |
| Plant protein of unknown function (DUF828)    | -31.05128205 | 0.005967596 |
| Plant protein of unknown function (DUF828)    | -28.96212525 | 2.82727E-05 |
| SOUL heme-binding family protein              | -29.87711214 | 0.000553287 |
| UDP-Glycosyltransferase superfamily protein   | -45.19632414 | 0.001732018 |
| UDP-Glycosyltransferase superfamily protein   | -44.375      | 2.88148E-05 |
| Signal recognition particle, SRP9/SRP14 subu  | -26.95926872 | 0.000564005 |
| Ribosomal protein S8e family protein          | -30.30450908 | 2.5857E-06  |
| F-box family protein                          | -35.89256647 | 0.001854191 |
| GPI transamidase component PIG-S-related      | -33.00970874 | 9.77754E-06 |
| GPI transamidase component PIG-S-related      | -43.24324324 | 7.15679E-05 |
| Protein kinase superfamily protein            | -41.29554656 | 3.39505E-07 |
| Protein of unknown function (DUF674)          | -27.43902439 | 1.72039E-10 |
| Yippee family putative zinc-binding protein   | -26.32010354 | 1.46832E-06 |

|                                                 |              |             |
|-------------------------------------------------|--------------|-------------|
| Uncharacterized protein family (UPF0016)        | -40.87265231 | 4.77489E-07 |
| Uncharacterized protein family (UPF0016)        | -25.69007264 | 0.001114632 |
| N/A                                             | -29.56567242 | 0.008817792 |
| HEAT repeat-containing protein                  | -25.81578416 | 1.59077E-05 |
| RNA-binding (RRM/RBD/RNP motifs) family p       | -70          | 0.009734505 |
| HVA22-like protein K                            | -33.95983936 | 0.000330978 |
| N/A                                             | -27.91255665 | 0.003708649 |
| RAB GTPase homolog A1D                          | -47.23415682 | 6.7166E-12  |
| RAB GTPase homolog A1D                          | -50.79772995 | 7.78881E-31 |
| RAB GTPase homolog A1D                          | -29.44175971 | 1.2481E-13  |
| golgin candidate 6                              | -34.92747253 | 0.000472038 |
| auxin response factor 8                         | -60          | 0.005453457 |
| CLIP-associated protein                         | -28.35820896 | 2.47181E-05 |
| CLIP-associated protein                         | -28.84615385 | 0.006424062 |
| peptide deformylase 1B                          | -25.47172588 | 0.000939253 |
| SET domain group 29                             | -39.84848485 | 3.34188E-05 |
| TLC ATP/ADP transporter                         | -34.98217469 | 0.006817451 |
| MALE GAMETOPHYTE DEFECTIVE 2                    | -34.54829471 | 0.001051588 |
| Protein of unknown function (DUF3754)           | -53.04347826 | 0.004918235 |
| DHHC-type zinc finger family protein            | -35.95505618 | 5.17298E-07 |
| DHHC-type zinc finger family protein            | -57.89473684 | 4.30994E-10 |
| plant glycogenin-like starch initiation protein | -78.26086957 | 0.003349409 |
| MuDR family transposase                         | -25.04862462 | 0.004100339 |
| P-loop containing nucleoside triphosphate h)    | -53.64238411 | 4.0498E-10  |
| extra-large G-protein 1                         | -80.64516129 | 0.003261074 |
| EXS (ERD1/XPR1/SYG1) family protein             | -36.84210526 | 5.11057E-05 |
| zinc ion binding;nucleic acid binding           | -75.71428571 | 0.002789447 |
| N/A                                             | -50.79113924 | 0.004912718 |
| ortholog of human splicing factor SC35          | -50.79113924 | 0.004912718 |
| N/A                                             | -27.74864025 | 0.001834553 |
| GRAM domain family protein                      | -45.20833333 | 6.07347E-08 |
| ubiquitin-specific protease 13                  | -25.31282051 | 4.60196E-14 |
| F-box family protein                            | -44.54545455 | 4.18748E-05 |
| Transmembrane Fragile-X-F-associated prote      | -32.96296296 | 1.66982E-08 |
| Transmembrane Fragile-X-F-associated prote      | -38.41269841 | 0.000454697 |
| Transmembrane Fragile-X-F-associated prote      | -54.05128205 | 1.72039E-10 |
| N/A                                             | -62.16216216 | 0.004306119 |
| lipase class 3 family protein                   | -30.12350265 | 0.004310897 |
| Protein of unknown function (DUF2296)           | -28.30572508 | 0.002165398 |

---

**P value**

---

1.53347E-08  
1.97285E-07  
9.25555E-07  
1.91899E-11  
1.5405E-06  
1.89696E-06  
1.603E-12  
1.45485E-06  
1.88788E-07  
1.29182E-07  
4.52396E-07  
1.36236E-05  
2.02113E-05  
1.67033E-26  
9.93217E-08  
7.3091E-10  
1.05427E-05  
1.9085E-07  
1.9085E-07  
7.48107E-06  
1.047E-06  
4.17858E-07  
2.09842E-05  
1.1785E-05  
4.09378E-06  
2.24435E-05  
5.95364E-17  
7.20785E-09  
6.24153E-06  
1.83527E-10  
6.24153E-06  
1.83527E-10  
9.61483E-06  
7.97546E-18  
3.02304E-06  
1.38594E-08  
1.14635E-05  
5.13357E-08  
2.47293E-09  
2.49565E-06  
5.33371E-10

3.33429E-05  
8.49149E-06  
3.28019E-07  
2.2949E-12  
3.34949E-05  
2.8191E-05  
1.30847E-05  
6.98768E-06  
1.34314E-14  
9.46497E-06  
9.30346E-06  
8.50027E-08  
3.33749E-08  
1.04702E-11  
1.04702E-11  
2.27912E-08  
1.69479E-06  
3.73074E-13  
1.05997E-10  
1.16401E-07  
2.51924E-06  
3.19106E-05  
3.19106E-05  
4.86861E-10  
2.03501E-10  
6.15261E-12  
1.05407E-05  
8.47917E-09  
3.17232E-11  
5.71431E-07  
6.38621E-06  
1.38256E-05  
3.35673E-05  
2.8191E-05  
8.93749E-06  
4.16123E-08  
4.3116E-06  
1.20881E-05  
2.39947E-17  
7.42567E-06  
2.88426E-05  
1.29673E-05  
2.94858E-05



7.10017E-06  
3.05715E-06  
3.05715E-06  
1.2954E-07  
4.64642E-07  
1.14357E-05  
8.59907E-08  
1.35124E-06  
9.83457E-20  
1.43578E-18  
1.49176E-05  
5.1835E-18  
1.8822E-22  
3.99696E-09  
3.47697E-05  
6.27749E-07  
2.48861E-10  
5.47173E-07  
4.38187E-08  
8.28395E-07  
1.36465E-23  
3.0849E-07  
9.36585E-07  
1.14743E-05  
1.33297E-06  
4.12778E-06  
1.84352E-09  
1.59388E-06  
1.19043E-09  
1.09688E-09  
2.89072E-08  
6.97507E-07  
1.57091E-05  
4.6196E-06  
1.67958E-07  
3.29824E-05  
1.10641E-05  
6.9442E-11  
1.02015E-06  
5.21642E-06  
1.99569E-11  
1.60698E-05  
1.60698E-05

1.60698E-05  
1.60698E-05  
5.89593E-13  
2.57826E-06  
3.22077E-05  
1.53075E-06  
2.06384E-12  
1.51152E-06  
2.36062E-06  
2.48748E-06  
6.0514E-06  
2.83084E-05  
1.29573E-05  
2.50495E-05  
7.14785E-08  
8.39691E-15  
4.49561E-09  
3.93294E-08  
1.25257E-05  
2.79516E-14  
3.11625E-07  
2.51726E-11  
6.31521E-06  
5.46377E-06  
1.69533E-06  
2.86198E-09  
5.55295E-12  
1.24378E-06  
3.07483E-05  
2.01904E-07  
1.59569E-18  
2.20853E-05  
1.24965E-06  
3.63526E-07  
8.39813E-12  
1.40492E-07  
1.02059E-11  
1.07313E-07  
1.32308E-05  
8.32594E-09  
1.32193E-07  
3.34761E-06  
6.70221E-06

6.88438E-07  
7.73159E-06  
7.73159E-06  
1.55316E-06  
1.61806E-05  
7.66658E-06  
3.48291E-07  
1.89817E-10  
2.9091E-07  
7.45699E-09  
1.25675E-06  
9.64667E-10  
1.98623E-06  
5.6023E-06  
2.02567E-05  
1.48334E-05  
1.36824E-05  
1.63461E-17  
3.816E-18  
1.02131E-05  
3.23616E-16  
1.38113E-07  
2.30684E-18  
1.14715E-23  
3.23705E-06  
1.93644E-39  
3.75959E-07  
2.62384E-05  
2.73471E-05  
4.2854E-06  
3.01682E-06  
1.54644E-06  
1.03554E-05  
2.72637E-10  
8.79935E-06  
7.24691E-06  
1.16318E-05  
3.59766E-06  
1.61046E-05  
1.72431E-09  
1.00211E-05  
1.81625E-05  
1.04092E-06

1.42408E-05  
2.87525E-05  
1.08146E-07  
1.43439E-05  
1.75582E-08  
9.39458E-06  
1.40133E-05  
2.02824E-12  
3.6686E-10  
3.6686E-10  
2.02824E-12  
1.25558E-06  
4.47039E-09  
2.93751E-12  
4.87397E-13  
1.51174E-06  
3.23635E-13  
3.20664E-07  
1.32575E-07  
6.73296E-07  
2.30427E-07  
8.19239E-06  
1.22429E-05  
1.97633E-06  
2.15089E-08  
2.97057E-08  
7.40115E-06  
1.42828E-05  
3.70912E-05  
2.81011E-16  
8.05349E-14  
3.55824E-08  
1.06758E-19  
1.31487E-06  
1.33897E-05  
1.17143E-09  
2.99093E-11  
1.56153E-05  
1.14982E-06  
1.46013E-06  
1.24831E-05  
1.81257E-05  
3.24351E-06

1.34295E-05  
2.32605E-16  
4.059E-14  
5.56771E-07  
2.71281E-07  
1.49219E-10  
2.326E-14  
3.495E-05  
3.44097E-12  
6.53421E-17  
8.80129E-08  
3.33554E-15  
1.4853E-13  
1.67882E-05  
1.71565E-05  
6.8523E-06  
8.15837E-08  
4.2975E-07  
7.74229E-06  
1.53977E-05  
1.6653E-06  
2.46881E-15  
2.61859E-28  
3.32511E-05  
3.65965E-08  
9.23625E-06  
1.21236E-05  
6.47753E-06  
1.35527E-17  
9.73053E-11  
1.32749E-13  
3.85928E-21  
6.09817E-08  
4.9452E-07  
3.30933E-07  
6.56148E-07  
4.10697E-09  
5.51469E-13  
6.94185E-12  
2.66257E-09  
4.45383E-08  
1.63154E-09  
8.97176E-10

2.28684E-05  
1.54889E-06  
1.01135E-05  
3.62628E-06  
4.56866E-09  
2.08233E-05  
1.0537E-14  
2.1572E-05  
1.24812E-06  
1.02423E-05  
6.81895E-07  
1.18491E-05  
1.71555E-08  
1.12516E-06  
3.67925E-05  
3.26674E-05  
4.21951E-07  
2.8838E-05  
2.84237E-05  
9.45424E-13  
1.50195E-06  
3.66578E-05  
3.19382E-05  
3.19382E-05  
7.8538E-06  
2.78645E-06  
2.80684E-05  
3.30513E-05  
6.34577E-06  
1.149E-07  
8.17656E-17  
3.32884E-07  
1.25256E-05  
7.98475E-06  
2.87647E-05  
9.07894E-06  
2.70956E-05  
5.03101E-07  
3.09832E-14  
3.30295E-08  
3.17468E-05  
1.16469E-05  
1.40285E-05

1.45894E-12  
9.84884E-11  
2.0767E-15  
1.14526E-18  
4.95348E-10  
2.97575E-05  
1.0578E-10  
5.34799E-08  
8.5743E-07  
3.61495E-05  
3.61495E-05  
5.17793E-06  
7.57662E-06  
6.07164E-09  
1.87514E-05  
1.20002E-07  
1.93343E-05  
4.78155E-14  
6.14665E-07  
4.38346E-06  
1.79857E-09  
3.55891E-06  
4.186E-08  
1.05921E-06  
7.24742E-08  
3.89364E-08  
2.7323E-06  
1.78005E-08  
8.94141E-07  
9.41324E-07  
1.7199E-05  
1.56862E-08  
6.36309E-07  
2.99431E-06  
1.60059E-08  
6.52574E-07  
9.23572E-10  
3.29462E-06  
4.42326E-09  
4.94342E-08  
8.96119E-11  
1.9316E-14  
4.85008E-10

1.34262E-10  
1.65253E-06  
3.04768E-05  
7.85449E-09  
3.56521E-05  
3.3445E-07  
8.56653E-06  
5.46845E-16  
3.06843E-36  
7.04763E-18  
5.2224E-07  
1.50174E-05  
1.34219E-08  
1.92998E-05  
1.29076E-06  
1.9237E-08  
2.10116E-05  
1.51487E-06  
1.29396E-05  
1.47749E-10  
5.29183E-14  
7.41565E-06  
9.88589E-06  
4.94583E-14  
7.14299E-06  
3.26159E-08  
5.73815E-06  
1.29135E-05  
1.29135E-05  
3.24625E-06  
1.28406E-11  
2.2662E-18  
2.54599E-08  
3.01506E-12  
4.97332E-07  
1.92407E-14  
1.06223E-05  
1.06458E-05  
4.07765E-06

---



**Supplemental Table 7: List of 282 hypo-methylated genes in C  
METHYLATED REGION**

---

mytileDiff25p200.hypo\_merged\_CHH.Chr01.2214801-2215000  
mytileDiff25p200.hypo\_merged\_CHH.Chr01.4130001-4130200  
mytileDiff25p200.hypo\_merged\_CHH.Chr01.17777401-17777600  
mytileDiff25p200.hypo\_merged\_CHH.Chr01.27108801-27109000  
mytileDiff25p200.hypo\_merged\_CHH.Chr01.45569801-45570000  
mytileDiff25p200.hypo\_merged\_CHH.Chr01.45752201-45752400  
mytileDiff25p200.hypo\_merged\_CHH.Chr01.49102001-49102200  
mytileDiff25p200.hypo\_merged\_CHH.Chr01.49437001-49437200  
mytileDiff25p200.hypo\_merged\_CHH.Chr01.50436601-50436800  
mytileDiff25p200.hypo\_merged\_CHH.Chr01.50606401-50606600  
mytileDiff25p200.hypo\_merged\_CHH.Chr01.50606201-50606400  
mytileDiff25p200.hypo\_merged\_CHH.Chr01.51982201-51982400  
mytileDiff25p200.hypo\_merged\_CHH.Chr01.52517201-52517400  
mytileDiff25p200.hypo\_merged\_CHH.Chr01.53463601-53463800  
mytileDiff25p200.hypo\_merged\_CHH.Chr01.56617801-56618000  
mytileDiff25p200.hypo\_merged\_CHH.Chr02.408001-408200  
mytileDiff25p200.hypo\_merged\_CHH.Chr02.2477201-2477400  
mytileDiff25p200.hypo\_merged\_CHH.Chr02.7967001-7967200  
mytileDiff25p200.hypo\_merged\_CHH.Chr02.9761401-9761600  
mytileDiff25p200.hypo\_merged\_CHH.Chr02.11374801-11375000  
mytileDiff25p200.hypo\_merged\_CHH.Chr02.11529601-11529800  
mytileDiff25p200.hypo\_merged\_CHH.Chr02.14091001-14091200  
mytileDiff25p200.hypo\_merged\_CHH.Chr02.17739001-17739200  
mytileDiff25p200.hypo\_merged\_CHH.Chr02.26357801-26358000  
mytileDiff25p200.hypo\_merged\_CHH.Chr02.41492801-41493000  
mytileDiff25p200.hypo\_merged\_CHH.Chr02.42108401-42108600  
mytileDiff25p200.hypo\_merged\_CHH.Chr02.45693601-45693800  
mytileDiff25p200.hypo\_merged\_CHH.Chr02.46045401-46045600  
mytileDiff25p200.hypo\_merged\_CHH.Chr02.48172601-48172800  
mytileDiff25p200.hypo\_merged\_CHH.Chr03.3101601-3101800  
mytileDiff25p200.hypo\_merged\_CHH.Chr03.3101801-3102000  
mytileDiff25p200.hypo\_merged\_CHH.Chr03.14160601-14160800  
mytileDiff25p200.hypo\_merged\_CHH.Chr03.25563601-25563800  
mytileDiff25p200.hypo\_merged\_CHH.Chr03.28480601-28480800  
mytileDiff25p200.hypo\_merged\_CHH.Chr03.29539201-29539400  
mytileDiff25p200.hypo\_merged\_CHH.Chr03.32199201-32199400  
mytileDiff25p200.hypo\_merged\_CHH.Chr03.32863001-32863200  
mytileDiff25p200.hypo\_merged\_CHH.Chr03.33421601-33421800  
mytileDiff25p200.hypo\_merged\_CHH.Chr03.36330001-36330200  
mytileDiff25p200.hypo\_merged\_CHH.Chr03.39211801-39212000  
mytileDiff25p200.hypo\_merged\_CHH.Chr03.43346201-43346400

mytileDiff25p200.hypo\_merged\_CHH.Chr03.44819401-44819600  
mytileDiff25p200.hypo\_merged\_CHH.Chr04.576401-576600  
mytileDiff25p200.hypo\_merged\_CHH.Chr04.576401-576600  
mytileDiff25p200.hypo\_merged\_CHH.Chr04.879201-879400  
mytileDiff25p200.hypo\_merged\_CHH.Chr04.1426201-1426400  
mytileDiff25p200.hypo\_merged\_CHH.Chr04.5337401-5337600  
mytileDiff25p200.hypo\_merged\_CHH.Chr04.5467001-5467200  
mytileDiff25p200.hypo\_merged\_CHH.Chr04.12759601-12759800  
mytileDiff25p200.hypo\_merged\_CHH.Chr04.15809601-15809800  
mytileDiff25p200.hypo\_merged\_CHH.Chr04.15974801-15975000  
mytileDiff25p200.hypo\_merged\_CHH.Chr04.46177001-46177200  
mytileDiff25p200.hypo\_merged\_CHH.Chr04.46510801-46511000  
mytileDiff25p200.hypo\_merged\_CHH.Chr04.46638601-46638800  
mytileDiff25p200.hypo\_merged\_CHH.Chr04.47754001-47754200  
mytileDiff25p200.hypo\_merged\_CHH.Chr04.48897401-48897600  
mytileDiff25p200.hypo\_merged\_CHH.Chr04.50267801-50268000  
mytileDiff25p200.hypo\_merged\_CHH.Chr05.4002201-4002400  
mytileDiff25p200.hypo\_merged\_CHH.Chr05.4748401-4748600  
mytileDiff25p200.hypo\_merged\_CHH.Chr05.13436001-13436200  
mytileDiff25p200.hypo\_merged\_CHH.Chr05.31841201-31841400  
mytileDiff25p200.hypo\_merged\_CHH.Chr05.34791001-34791200  
mytileDiff25p200.hypo\_merged\_CHH.Chr05.35270601-35270800  
mytileDiff25p200.hypo\_merged\_CHH.Chr05.42115601-42115800  
mytileDiff25p200.hypo\_merged\_CHH.Chr06.2538601-2538800  
mytileDiff25p200.hypo\_merged\_CHH.Chr06.2600201-2600400  
mytileDiff25p200.hypo\_merged\_CHH.Chr06.4246001-4246200  
mytileDiff25p200.hypo\_merged\_CHH.Chr06.4658401-4658600  
mytileDiff25p200.hypo\_merged\_CHH.Chr06.5636801-5637000  
mytileDiff25p200.hypo\_merged\_CHH.Chr06.9293401-9293600  
mytileDiff25p200.hypo\_merged\_CHH.Chr06.10292401-10292600  
mytileDiff25p200.hypo\_merged\_CHH.Chr06.15229601-15229800  
mytileDiff25p200.hypo\_merged\_CHH.Chr06.20964401-20964600  
mytileDiff25p200.hypo\_merged\_CHH.Chr06.29534201-29534400  
mytileDiff25p200.hypo\_merged\_CHH.Chr06.41711401-41711600  
mytileDiff25p200.hypo\_merged\_CHH.Chr06.46731801-46732000  
mytileDiff25p200.hypo\_merged\_CHH.Chr06.47363201-47363400  
mytileDiff25p200.hypo\_merged\_CHH.Chr06.47529201-47529400  
mytileDiff25p200.hypo\_merged\_CHH.Chr06.49418201-49418400  
mytileDiff25p200.hypo\_merged\_CHH.Chr06.50442601-50442800  
mytileDiff25p200.hypo\_merged\_CHH.Chr07.2813001-2813200  
mytileDiff25p200.hypo\_merged\_CHH.Chr07.4401601-4401800  
mytileDiff25p200.hypo\_merged\_CHH.Chr07.7054401-7054600  
mytileDiff25p200.hypo\_merged\_CHH.Chr07.8052601-8052800

mytileDiff25p200.hypo\_merged\_CHH.Chr07.11930201-11930400  
mytileDiff25p200.hypo\_merged\_CHH.Chr07.13047201-13047400  
mytileDiff25p200.hypo\_merged\_CHH.Chr07.14794401-14794600  
mytileDiff25p200.hypo\_merged\_CHH.Chr07.15414601-15414800  
mytileDiff25p200.hypo\_merged\_CHH.Chr07.16132201-16132400  
mytileDiff25p200.hypo\_merged\_CHH.Chr07.19438801-19439000  
mytileDiff25p200.hypo\_merged\_CHH.Chr07.25166401-25166600  
mytileDiff25p200.hypo\_merged\_CHH.Chr07.37881601-37881800  
mytileDiff25p200.hypo\_merged\_CHH.Chr07.38442401-38442600  
mytileDiff25p200.hypo\_merged\_CHH.Chr07.41844801-41845000  
mytileDiff25p200.hypo\_merged\_CHH.Chr07.44186201-44186400  
mytileDiff25p200.hypo\_merged\_CHH.Chr07.44601001-44601200  
mytileDiff25p200.hypo\_merged\_CHH.Chr07.44601001-44601200  
mytileDiff25p200.hypo\_merged\_CHH.Chr08.2891801-2892000  
mytileDiff25p200.hypo\_merged\_CHH.Chr08.3138601-3138800  
mytileDiff25p200.hypo\_merged\_CHH.Chr08.8877001-8877200  
mytileDiff25p200.hypo\_merged\_CHH.Chr08.10741401-10741600  
mytileDiff25p200.hypo\_merged\_CHH.Chr08.15952801-15953000  
mytileDiff25p200.hypo\_merged\_CHH.Chr08.17832401-17832600  
mytileDiff25p200.hypo\_merged\_CHH.Chr08.17937401-17937600  
mytileDiff25p200.hypo\_merged\_CHH.Chr08.20403601-20403800  
mytileDiff25p200.hypo\_merged\_CHH.Chr08.20497201-20497400  
mytileDiff25p200.hypo\_merged\_CHH.Chr08.20680401-20680600  
mytileDiff25p200.hypo\_merged\_CHH.Chr08.30752601-30752800  
mytileDiff25p200.hypo\_merged\_CHH.Chr08.34588401-34588600  
mytileDiff25p200.hypo\_merged\_CHH.Chr08.35508801-35509000  
mytileDiff25p200.hypo\_merged\_CHH.Chr08.37878401-37878600  
mytileDiff25p200.hypo\_merged\_CHH.Chr08.44636601-44636800  
mytileDiff25p200.hypo\_merged\_CHH.Chr08.46330201-46330400  
mytileDiff25p200.hypo\_merged\_CHH.Chr08.46959801-46960000  
mytileDiff25p200.hypo\_merged\_CHH.Chr09.3661401-3661600  
mytileDiff25p200.hypo\_merged\_CHH.Chr09.4264001-4264200  
mytileDiff25p200.hypo\_merged\_CHH.Chr09.5002801-5003000  
mytileDiff25p200.hypo\_merged\_CHH.Chr09.6937401-6937600  
mytileDiff25p200.hypo\_merged\_CHH.Chr09.7654201-7654400  
mytileDiff25p200.hypo\_merged\_CHH.Chr09.21296401-21296600  
mytileDiff25p200.hypo\_merged\_CHH.Chr09.22180001-22180200  
mytileDiff25p200.hypo\_merged\_CHH.Chr09.22411001-22411200  
mytileDiff25p200.hypo\_merged\_CHH.Chr09.30839601-30839800  
mytileDiff25p200.hypo\_merged\_CHH.Chr09.31116001-31116200  
mytileDiff25p200.hypo\_merged\_CHH.Chr09.37637601-37637800  
mytileDiff25p200.hypo\_merged\_CHH.Chr09.37725601-37725800  
mytileDiff25p200.hypo\_merged\_CHH.Chr09.40577001-40577200

mytileDiff25p200.hypo\_merged\_CHH.Chr09.40834201-40834400  
mytileDiff25p200.hypo\_merged\_CHH.Chr09.41774801-41775000  
mytileDiff25p200.hypo\_merged\_CHH.Chr09.47801201-47801400  
mytileDiff25p200.hypo\_merged\_CHH.Chr09.50161601-50161800  
mytileDiff25p200.hypo\_merged\_CHH.Chr10.3038001-3038200  
mytileDiff25p200.hypo\_merged\_CHH.Chr10.3909601-3909800  
mytileDiff25p200.hypo\_merged\_CHH.Chr10.5538601-5538800  
mytileDiff25p200.hypo\_merged\_CHH.Chr10.8897401-8897600  
mytileDiff25p200.hypo\_merged\_CHH.Chr10.38725801-38726000  
mytileDiff25p200.hypo\_merged\_CHH.Chr10.39346801-39347000  
mytileDiff25p200.hypo\_merged\_CHH.Chr10.39855401-39855600  
mytileDiff25p200.hypo\_merged\_CHH.Chr10.40784601-40784800  
mytileDiff25p200.hypo\_merged\_CHH.Chr10.41608801-41609000  
mytileDiff25p200.hypo\_merged\_CHH.Chr10.42844601-42844800  
mytileDiff25p200.hypo\_merged\_CHH.Chr10.46456201-46456400  
mytileDiff25p200.hypo\_merged\_CHH.Chr10.47181201-47181400  
mytileDiff25p200.hypo\_merged\_CHH.Chr10.50292801-50293000  
mytileDiff25p200.hypo\_merged\_CHH.Chr11.1414801-1415000  
mytileDiff25p200.hypo\_merged\_CHH.Chr11.1415001-1415200  
mytileDiff25p200.hypo\_merged\_CHH.Chr11.4164201-4164400  
mytileDiff25p200.hypo\_merged\_CHH.Chr11.7314401-7314600  
mytileDiff25p200.hypo\_merged\_CHH.Chr11.9870401-9870600  
mytileDiff25p200.hypo\_merged\_CHH.Chr11.10774801-10775000  
mytileDiff25p200.hypo\_merged\_CHH.Chr11.18328201-18328400  
mytileDiff25p200.hypo\_merged\_CHH.Chr11.25293001-25293200  
mytileDiff25p200.hypo\_merged\_CHH.Chr11.26637401-26637600  
mytileDiff25p200.hypo\_merged\_CHH.Chr11.27883201-27883400  
mytileDiff25p200.hypo\_merged\_CHH.Chr11.29046601-29046800  
mytileDiff25p200.hypo\_merged\_CHH.Chr11.34340201-34340400  
mytileDiff25p200.hypo\_merged\_CHH.Chr12.1185401-1185600  
mytileDiff25p200.hypo\_merged\_CHH.Chr12.2999001-2999200  
mytileDiff25p200.hypo\_merged\_CHH.Chr12.3714801-3715000  
mytileDiff25p200.hypo\_merged\_CHH.Chr12.4413401-4413600  
mytileDiff25p200.hypo\_merged\_CHH.Chr12.12686201-12686400  
mytileDiff25p200.hypo\_merged\_CHH.Chr12.17522201-17522400  
mytileDiff25p200.hypo\_merged\_CHH.Chr12.20548801-20549000  
mytileDiff25p200.hypo\_merged\_CHH.Chr12.35397001-35397200  
mytileDiff25p200.hypo\_merged\_CHH.Chr12.35945201-35945400  
mytileDiff25p200.hypo\_merged\_CHH.Chr12.37543001-37543200  
mytileDiff25p200.hypo\_merged\_CHH.Chr12.38284801-38285000  
mytileDiff25p200.hypo\_merged\_CHH.Chr12.39182001-39182200  
mytileDiff25p200.hypo\_merged\_CHH.Chr12.39432601-39432800  
mytileDiff25p200.hypo\_merged\_CHH.Chr13.2724401-2724600

mytileDiff25p200.hypo\_merged\_CHH.Chr13.2724601-2724800  
mytileDiff25p200.hypo\_merged\_CHH.Chr13.13560801-13561000  
mytileDiff25p200.hypo\_merged\_CHH.Chr13.14950801-14951000  
mytileDiff25p200.hypo\_merged\_CHH.Chr13.15700801-15701000  
mytileDiff25p200.hypo\_merged\_CHH.Chr13.20379601-20379800  
mytileDiff25p200.hypo\_merged\_CHH.Chr13.22914001-22914200  
mytileDiff25p200.hypo\_merged\_CHH.Chr13.24272201-24272400  
mytileDiff25p200.hypo\_merged\_CHH.Chr13.24327201-24327400  
mytileDiff25p200.hypo\_merged\_CHH.Chr13.24687601-24687800  
mytileDiff25p200.hypo\_merged\_CHH.Chr13.27213201-27213400  
mytileDiff25p200.hypo\_merged\_CHH.Chr13.27588801-27589000  
mytileDiff25p200.hypo\_merged\_CHH.Chr13.34589801-34590000  
mytileDiff25p200.hypo\_merged\_CHH.Chr13.36357601-36357800  
mytileDiff25p200.hypo\_merged\_CHH.Chr13.37859401-37859600  
mytileDiff25p200.hypo\_merged\_CHH.Chr13.38494801-38495000  
mytileDiff25p200.hypo\_merged\_CHH.Chr13.42289201-42289400  
mytileDiff25p200.hypo\_merged\_CHH.Chr13.43574201-43574400  
mytileDiff25p200.hypo\_merged\_CHH.Chr13.43574201-43574400  
mytileDiff25p200.hypo\_merged\_CHH.Chr13.44136601-44136800  
mytileDiff25p200.hypo\_merged\_CHH.Chr13.45272601-45272800  
mytileDiff25p200.hypo\_merged\_CHH.Chr13.45372801-45373000  
mytileDiff25p200.hypo\_merged\_CHH.Chr13.45755601-45755800  
mytileDiff25p200.hypo\_merged\_CHH.Chr14.3356801-3357000  
mytileDiff25p200.hypo\_merged\_CHH.Chr14.4442001-4442200  
mytileDiff25p200.hypo\_merged\_CHH.Chr14.8867601-8867800  
mytileDiff25p200.hypo\_merged\_CHH.Chr14.10752601-10752800  
mytileDiff25p200.hypo\_merged\_CHH.Chr14.22556201-22556400  
mytileDiff25p200.hypo\_merged\_CHH.Chr14.24651801-24652000  
mytileDiff25p200.hypo\_merged\_CHH.Chr14.32615401-32615600  
mytileDiff25p200.hypo\_merged\_CHH.Chr14.42387001-42387200  
mytileDiff25p200.hypo\_merged\_CHH.Chr14.44030601-44030800  
mytileDiff25p200.hypo\_merged\_CHH.Chr14.46480401-46480600  
mytileDiff25p200.hypo\_merged\_CHH.Chr14.46583201-46583400  
mytileDiff25p200.hypo\_merged\_CHH.Chr15.109201-109400  
mytileDiff25p200.hypo\_merged\_CHH.Chr15.2098401-2098600  
mytileDiff25p200.hypo\_merged\_CHH.Chr15.2455801-2456000  
mytileDiff25p200.hypo\_merged\_CHH.Chr15.2823601-2823800  
mytileDiff25p200.hypo\_merged\_CHH.Chr15.3726201-3726400  
mytileDiff25p200.hypo\_merged\_CHH.Chr15.4475601-4475800  
mytileDiff25p200.hypo\_merged\_CHH.Chr15.4548401-4548600  
mytileDiff25p200.hypo\_merged\_CHH.Chr15.5465201-5465400  
mytileDiff25p200.hypo\_merged\_CHH.Chr15.11267201-11267400  
mytileDiff25p200.hypo\_merged\_CHH.Chr15.11975401-11975600

mytileDiff25p200.hypo\_merged\_CHH.Chr15.14345001-14345200  
mytileDiff25p200.hypo\_merged\_CHH.Chr15.15810601-15810800  
mytileDiff25p200.hypo\_merged\_CHH.Chr15.21084001-21084200  
mytileDiff25p200.hypo\_merged\_CHH.Chr15.21261401-21261600  
mytileDiff25p200.hypo\_merged\_CHH.Chr15.34501801-34502000  
mytileDiff25p200.hypo\_merged\_CHH.Chr15.44258001-44258200  
mytileDiff25p200.hypo\_merged\_CHH.Chr15.46974401-46974600  
mytileDiff25p200.hypo\_merged\_CHH.Chr15.47445601-47445800  
mytileDiff25p200.hypo\_merged\_CHH.Chr15.48443401-48443600  
mytileDiff25p200.hypo\_merged\_CHH.Chr15.48513401-48513600  
mytileDiff25p200.hypo\_merged\_CHH.Chr16.3874801-3875000  
mytileDiff25p200.hypo\_merged\_CHH.Chr16.6684201-6684400  
mytileDiff25p200.hypo\_merged\_CHH.Chr16.8083801-8084000  
mytileDiff25p200.hypo\_merged\_CHH.Chr16.11237201-11237400  
mytileDiff25p200.hypo\_merged\_CHH.Chr16.11237201-11237400  
mytileDiff25p200.hypo\_merged\_CHH.Chr16.24732401-24732600  
mytileDiff25p200.hypo\_merged\_CHH.Chr16.28009401-28009600  
mytileDiff25p200.hypo\_merged\_CHH.Chr16.36374001-36374200  
mytileDiff25p200.hypo\_merged\_CHH.Chr17.1352801-1353000  
mytileDiff25p200.hypo\_merged\_CHH.Chr17.2058201-2058400  
mytileDiff25p200.hypo\_merged\_CHH.Chr17.3326801-3327000  
mytileDiff25p200.hypo\_merged\_CHH.Chr17.4341601-4341800  
mytileDiff25p200.hypo\_merged\_CHH.Chr17.4576001-4576200  
mytileDiff25p200.hypo\_merged\_CHH.Chr17.7313001-7313200  
mytileDiff25p200.hypo\_merged\_CHH.Chr17.7312801-7313000  
mytileDiff25p200.hypo\_merged\_CHH.Chr17.9056601-9056800  
mytileDiff25p200.hypo\_merged\_CHH.Chr17.9375001-9375200  
mytileDiff25p200.hypo\_merged\_CHH.Chr17.11981401-11981600  
mytileDiff25p200.hypo\_merged\_CHH.Chr17.35123401-35123600  
mytileDiff25p200.hypo\_merged\_CHH.Chr17.40092401-40092600  
mytileDiff25p200.hypo\_merged\_CHH.Chr17.41294401-41294600  
mytileDiff25p200.hypo\_merged\_CHH.Chr18.662401-662600  
mytileDiff25p200.hypo\_merged\_CHH.Chr18.901801-902000  
mytileDiff25p200.hypo\_merged\_CHH.Chr18.7997001-7997200  
mytileDiff25p200.hypo\_merged\_CHH.Chr18.10454801-10455000  
mytileDiff25p200.hypo\_merged\_CHH.Chr18.14110401-14110600  
mytileDiff25p200.hypo\_merged\_CHH.Chr18.16372001-16372200  
mytileDiff25p200.hypo\_merged\_CHH.Chr18.19036001-19036200  
mytileDiff25p200.hypo\_merged\_CHH.Chr18.25241801-25242000  
mytileDiff25p200.hypo\_merged\_CHH.Chr18.43311801-43312000  
mytileDiff25p200.hypo\_merged\_CHH.Chr18.50402801-50403000  
mytileDiff25p200.hypo\_merged\_CHH.Chr18.57681801-57682000  
mytileDiff25p200.hypo\_merged\_CHH.Chr19.593201-593400

mytileDiff25p200.hypo\_merged\_CHH.Chr19.1054401-1054600  
mytileDiff25p200.hypo\_merged\_CHH.Chr19.37379801-37380000  
mytileDiff25p200.hypo\_merged\_CHH.Chr19.38288801-38289000  
mytileDiff25p200.hypo\_merged\_CHH.Chr19.41708401-41708600  
mytileDiff25p200.hypo\_merged\_CHH.Chr19.44439001-44439200  
mytileDiff25p200.hypo\_merged\_CHH.Chr19.44955401-44955600  
mytileDiff25p200.hypo\_merged\_CHH.Chr19.47619401-47619600  
mytileDiff25p200.hypo\_merged\_CHH.Chr19.47776201-47776400  
mytileDiff25p200.hypo\_merged\_CHH.Chr19.48086401-48086600  
mytileDiff25p200.hypo\_merged\_CHH.Chr19.49743201-49743400  
mytileDiff25p200.hypo\_merged\_CHH.Chr19.49743201-49743400  
mytileDiff25p200.hypo\_merged\_CHH.Chr19.49835001-49835200  
mytileDiff25p200.hypo\_merged\_CHH.Chr20.482601-482800  
mytileDiff25p200.hypo\_merged\_CHH.Chr20.902201-902400  
mytileDiff25p200.hypo\_merged\_CHH.Chr20.2640601-2640800  
mytileDiff25p200.hypo\_merged\_CHH.Chr20.3140601-3140800  
mytileDiff25p200.hypo\_merged\_CHH.Chr20.3753601-3753800  
mytileDiff25p200.hypo\_merged\_CHH.Chr20.33784801-33785000  
mytileDiff25p200.hypo\_merged\_CHH.Chr20.34654401-34654600  
mytileDiff25p200.hypo\_merged\_CHH.Chr20.34654401-34654600  
mytileDiff25p200.hypo\_merged\_CHH.Chr20.36082801-36083000  
mytileDiff25p200.hypo\_merged\_CHH.Chr20.37906801-37907000  
mytileDiff25p200.hypo\_merged\_CHH.Chr20.41604401-41604600  
mytileDiff25p200.hypo\_merged\_CHH.Chr20.42106401-42106600  
mytileDiff25p200.hypo\_merged\_CHH.Chr20.43644001-43644200  
mytileDiff25p200.hypo\_merged\_CHH.Chr20.46804801-46805000  
mytileDiff25p200.hypo\_merged\_CHH.Chr20.47264001-47264200  
mytileDiff25p200.hypo\_merged\_CHH.scaffold\_223.13001-13200  
mytileDiff25p200.hypo\_merged\_CHH.scaffold\_31.263201-263400  
mytileDiff25p200.hypo\_merged\_CHH.scaffold\_32.247601-247800  
mytileDiff25p200.hypo\_merged\_CHH.scaffold\_361.3401-3600

---

**HH context.**

| <b>REGION</b>                    | <b>GENE ID</b>  |
|----------------------------------|-----------------|
| PROMOTER                         | Glyma.01G022300 |
| PROMOTER                         | Glyma.01G038600 |
| 3'UTR                            | Glyma.01G076200 |
| PROMOTER(72bp); 5'UTR(128bp)     | Glyma.01G089600 |
| GENE BODY                        | Glyma.01G134300 |
| GENE BODY (102bp); 3'UTR(98bp)   | Glyma.01G135400 |
| PROMOTER                         | Glyma.01G153600 |
| PROMOTER                         | Glyma.01G156800 |
| PROMOTER                         | Glyma.01G166400 |
| GENE BODY                        | Glyma.01G168400 |
| GENE BODY                        | Glyma.01G168400 |
| GENE BODY                        | Glyma.01G184500 |
| PROMOTER                         | Glyma.01G190400 |
| PROMOTER                         | Glyma.01G201000 |
| GENE BODY (169bp); 3'UTR(31bp)   | Glyma.01G243200 |
| GENE BODY                        | Glyma.02G003600 |
| GENE BODY                        | Glyma.02G027500 |
| GENE BODY                        | Glyma.02G090400 |
| PROMOTER                         | Glyma.02G102900 |
| PROMOTER                         | Glyma.02G116700 |
| PROMOTER                         | Glyma.02G117700 |
| GENE BODY                        | Glyma.02G135900 |
| GENE BODY                        | Glyma.02G159400 |
| GENE BODY                        | Glyma.02G170200 |
| GENE BODY                        | Glyma.02G228000 |
| PROMOTER                         | Glyma.02G233500 |
| 3'UTR                            | Glyma.02G273400 |
| 3'UTR                            | Glyma.02G277700 |
| PROMOTER                         | Glyma.02G307400 |
| PROMOTER                         | Glyma.03G028200 |
| PROMOTER                         | Glyma.03G028200 |
| GENE BODY                        | Glyma.03G068100 |
| PROMOTER(145bp); 5'UTR(55bp)     | Glyma.03G086600 |
| PROMOTER(174bp); GENE BODY(26bp) | Glyma.03G097200 |
| PROMOTER                         | Glyma.03G102800 |
| GENE BODY                        | Glyma.03G114700 |
| GENE BODY                        | Glyma.03G118200 |
| PROMOTER                         | Glyma.03G121600 |
| PROMOTER                         | Glyma.03G147700 |
| PROMOTER                         | Glyma.03G179900 |
| PROMOTER(6bp); 5'UTR(194bp)      | Glyma.03G232300 |



|                                |                 |
|--------------------------------|-----------------|
| PROMOTER                       | Glyma.03G252500 |
| PROMOTER                       | Glyma.04G007400 |
| PROMOTER                       | Glyma.04G007500 |
| GENE BODY (57bp); 3'UTR(143bp) | Glyma.04G011500 |
| PROMOTER                       | Glyma.04G018200 |
| PROMOTER                       | Glyma.04G064100 |
| PROMOTER                       | Glyma.04G065700 |
| GENE BODY                      | Glyma.04G113100 |
| PROMOTER                       | Glyma.04G122800 |
| GENE BODY                      | Glyma.04G123500 |
| PROMOTER                       | Glyma.04G191100 |
| PROMOTER                       | Glyma.04G193500 |
| PROMOTER (164bp); 5'UTR(36bp)  | Glyma.04G194600 |
| GENE BODY                      | Glyma.04G205000 |
| PROMOTER                       | Glyma.04G218200 |
| PROMOTER                       | Glyma.04G234000 |
| PROMOTER                       | Glyma.05G044900 |
| PROMOTER                       | Glyma.05G053000 |
| PROMOTER                       | Glyma.05G083300 |
| PROMOTER                       | Glyma.05G125000 |
| GENE BODY                      | Glyma.05G154700 |
| GENE BODY                      | Glyma.05G161000 |
| GENE BODY                      | Glyma.05G248000 |
| PROMOTER                       | Glyma.06G032800 |
| 3'UTR                          | Glyma.06G033700 |
| GENE BODY                      | Glyma.06G056300 |
| GENE BODY                      | Glyma.06G061900 |
| GENE BODY                      | Glyma.06G073100 |
| GENE BODY                      | Glyma.06G114500 |
| PROMOTER                       | Glyma.06G126000 |
| GENE BODY                      | Glyma.06G179300 |
| GENE BODY                      | Glyma.06G211100 |
| GENE BODY                      | Glyma.06G223300 |
| PROMOTER                       | Glyma.06G247200 |
| PROMOTER                       | Glyma.06G276200 |
| PROMOTER                       | Glyma.06G285000 |
| GENE BODY                      | Glyma.06G286700 |
| PROMOTER                       | Glyma.06G305100 |
| PROMOTER                       | Glyma.06G315300 |
| GENE BODY                      | Glyma.07G035100 |
| GENE BODY                      | Glyma.07G051000 |
| GENE BODY                      | Glyma.07G077400 |
| PROMOTER                       | Glyma.07G087000 |

|                                   |                 |
|-----------------------------------|-----------------|
| GENE BODY                         | Glyma.07G114200 |
| 3'UTR                             | Glyma.07G116900 |
| GENE BODY (122bp); 3'UTR(78bp)    | Glyma.07G124500 |
| PROMOTER                          | Glyma.07G129700 |
| GENE BODY                         | Glyma.07G136200 |
| PROMOTER                          | Glyma.07G157400 |
| PROMOTER                          | Glyma.07G165700 |
| PROMOTER                          | Glyma.07G209100 |
| PROMOTER                          | Glyma.07G212700 |
| PROMOTER                          | Glyma.07G236900 |
| PROMOTER                          | Glyma.07G268700 |
| PROMOTER                          | Glyma.07G274200 |
| PROMOTER                          | Glyma.07G274300 |
| GENE BODY                         | Glyma.08G036600 |
| PROMOTER                          | Glyma.08G039800 |
| PROMOTER                          | Glyma.08G115800 |
| PROMOTER                          | Glyma.08G140400 |
| GENE BODY                         | Glyma.08G197700 |
| GENE BODY                         | Glyma.08G219200 |
| PROMOTER                          | Glyma.08G220700 |
| GENE BODY (11bp); 3'UTR(189bp)    | Glyma.08G239000 |
| GENE BODY                         | Glyma.08G240400 |
| PROMOTER                          | Glyma.08G241900 |
| GENE BODY                         | Glyma.08G264900 |
| PROMOTER                          | Glyma.08G268800 |
| PROMOTER                          | Glyma.08G271700 |
| PROMOTER                          | Glyma.08G279800 |
| GENE BODY                         | Glyma.08G328500 |
| PROMOTER                          | Glyma.08G349000 |
| PROMOTER (191bp); 5'UTR (9bp)     | Glyma.08G357000 |
| PROMOTER                          | Glyma.09G042800 |
| PROMOTER                          | Glyma.09G049100 |
| PROMOTER                          | Glyma.09G055900 |
| PROMOTER                          | Glyma.09G068500 |
| GENE BODY                         | Glyma.09G073100 |
| PROMOTER                          | Glyma.09G109200 |
| PROMOTER                          | Glyma.09G111900 |
| PROMOTER (167bp); GENE BODY(33bp) | Glyma.09G112800 |
| PROMOTER                          | Glyma.09G124900 |
| 3'UTR (85bp)                      | Glyma.09G126300 |
| GENE BODY                         | Glyma.09G153500 |
| PROMOTER                          | Glyma.09G154200 |
| GENE BODY                         | Glyma.09G180800 |

|                                  |                 |
|----------------------------------|-----------------|
| PROMOTER                         | Glyma.09G183100 |
| PROMOTER                         | Glyma.09G193200 |
| PROMOTER                         | Glyma.09G259300 |
| PROMOTER                         | Glyma.09G286200 |
| GENE BODY (191bp); 3'UTR(9bp)    | Glyma.10G034900 |
| 5'UTR(110bp); GENE BODY (90bp)   | Glyma.10G043400 |
| GENE BODY                        | Glyma.10G060000 |
| GENE BODY                        | Glyma.10G078700 |
| GENE BODY(64bp); 3'UTR(136bp)    | Glyma.10G152500 |
| GENE BODY                        | Glyma.10G159300 |
| PROMOTER                         | Glyma.10G164400 |
| PROMOTER                         | Glyma.10G174000 |
| GENE BODY                        | Glyma.10G183000 |
| PROMOTER                         | Glyma.10G197100 |
| PROMOTER                         | Glyma.10G235100 |
| PROMOTER                         | Glyma.10G243300 |
| PROMOTER                         | Glyma.10G281900 |
| PROMOTER                         | Glyma.11G020100 |
| PROMOTER                         | Glyma.11G020100 |
| PROMOTER                         | Glyma.11G055200 |
| PROMOTER                         | Glyma.11G096200 |
| PROMOTER                         | Glyma.11G129700 |
| PROMOTER                         | Glyma.11G141100 |
| PROMOTER(198bp); GENE BODY(2bp)  | Glyma.11G170700 |
| GENE BODY                        | Glyma.11G184900 |
| GENE BODY                        | Glyma.11G193100 |
| PROMOTER                         | Glyma.11G200200 |
| PROMOTER                         | Glyma.11G206200 |
| PROMOTER                         | Glyma.11G252300 |
| GENE BODY                        | Glyma.12G016700 |
| PROMOTER                         | Glyma.12G041100 |
| PROMOTER                         | Glyma.12G051800 |
| PROMOTER                         | Glyma.12G060800 |
| GENE BODY                        | Glyma.12G119500 |
| PROMOTER(46bp); GENE BODY(154bp) | Glyma.12G140800 |
| PROMOTER                         | Glyma.12G147400 |
| GENE BODY                        | Glyma.12G192300 |
| GENE BODY                        | Glyma.12G198100 |
| GENE BODY                        | Glyma.12G216200 |
| PROMOTER                         | Glyma.12G223100 |
| GENE BODY                        | Glyma.12G231800 |
| GENE BODY                        | Glyma.12G235100 |
| GENE BODY                        | Glyma.13G010000 |

|                                   |                 |
|-----------------------------------|-----------------|
| GENE BODY                         | Glyma.13G010000 |
| 3'UTR                             | Glyma.13G042400 |
| PROMOTER                          | Glyma.13G052600 |
| 3'UTR                             | Glyma.13G059600 |
| GENE BODY                         | Glyma.13G089300 |
| GENE BODY                         | Glyma.13G115500 |
| GENE BODY                         | Glyma.13G129900 |
| 3'UTR                             | Glyma.13G130500 |
| GENE BODY                         | Glyma.13G134400 |
| PROMOTER                          | Glyma.13G156900 |
| PROMOTER                          | Glyma.13G160300 |
| PROMOTER                          | Glyma.13G235300 |
| PROMOTER                          | Glyma.13G259200 |
| PROMOTER                          | Glyma.13G277200 |
| 5'UTR (111bp); GENE BODY (89bp)   | Glyma.13G283900 |
| PROMOTER                          | Glyma.13G328200 |
| PROMOTER                          | Glyma.13G345000 |
| PROMOTER                          | Glyma.13G345100 |
| PROMOTER                          | Glyma.13G352500 |
| GENE BODY                         | Glyma.13G367200 |
| PROMOTER                          | Glyma.13G368100 |
| GENE BODY                         | Glyma.13G372400 |
| GENE BODY                         | Glyma.14G044300 |
| PROMOTER                          | Glyma.14G056000 |
| PROMOTER (151bp); 5'UTR(49bp)     | Glyma.14G095300 |
| PROMOTER                          | Glyma.14G104800 |
| GENE BODY                         | Glyma.14G131700 |
| PROMOTER                          | Glyma.14G137400 |
| GENE BODY                         | Glyma.14G151100 |
| PROMOTER                          | Glyma.14G171200 |
| PROMOTER                          | Glyma.14G179000 |
| PROMOTER                          | Glyma.14G199800 |
| PROMOTER (111bp); GENE BODY(89bp) | Glyma.14G200800 |
| PROMOTER                          | Glyma.15G000900 |
| 5'UTR                             | Glyma.15G025900 |
| 5'UTR(71bp); GENE BODY (129bp)    | Glyma.15G030500 |
| PROMOTER                          | Glyma.15G035400 |
| PROMOTER                          | Glyma.15G046800 |
| GENE BODY                         | Glyma.15G057900 |
| GENE BODY                         | Glyma.15G058900 |
| PROMOTER                          | Glyma.15G071300 |
| PROMOTER                          | Glyma.15G138400 |
| PROMOTER                          | Glyma.15G145400 |

|                                       |                 |
|---------------------------------------|-----------------|
| PROMOTER                              | Glyma.15G165300 |
| GENE BODY                             | Glyma.15G172700 |
| PROMOTER                              | Glyma.15G192800 |
| GENE BODY                             | Glyma.15G193400 |
| GENE BODY                             | Glyma.15G214400 |
| PROMOTER                              | Glyma.15G234900 |
| GENE BODY                             | Glyma.15G246800 |
| PROMOTER (160bp); 5'UTR(40bp)         | Glyma.15G248800 |
| PROMOTER                              | Glyma.15G255100 |
| PROMOTER                              | Glyma.15G255800 |
| GENE BODY                             | Glyma.16G041300 |
| PROMOTER                              | Glyma.16G067500 |
| PROMOTER                              | Glyma.16G078500 |
| PROMOTER                              | Glyma.16G088500 |
| PROMOTER                              | Glyma.16G088600 |
| PROMOTER                              | Glyma.16G111800 |
| 3'UTR                                 | Glyma.16G127900 |
| GENE BODY                             | Glyma.16G202300 |
| GENE BODY                             | Glyma.17G017700 |
| GENE BODY                             | Glyma.17G027700 |
| PROMOTER                              | Glyma.17G044800 |
| GENE BODY                             | Glyma.17G057300 |
| GENE BODY                             | Glyma.17G060300 |
| PROMOTER                              | Glyma.17G093700 |
| PROMOTER                              | Glyma.17G093700 |
| GENE BODY                             | Glyma.17G114400 |
| PROMOTER                              | Glyma.17G118400 |
| GENE BODY                             | Glyma.17G145700 |
| GENE BODY                             | Glyma.17G212300 |
| PROMOTER                              | Glyma.17G245500 |
| GENE BODY                             | Glyma.17G258800 |
| PROMOTER                              | Glyma.18G009100 |
| PROMOTER                              | Glyma.18G012700 |
| GENE BODY (37bp), 3'UTR(163bp)        | Glyma.18G082200 |
| GENE BODY                             | Glyma.18G099600 |
| GENE BODY                             | Glyma.18G115800 |
| PROMOTER                              | Glyma.18G124900 |
| PROMOTER                              | Glyma.18G133400 |
| GENE BODY                             | Glyma.18G147700 |
| PROMOTER                              | Glyma.18G179500 |
| PROMOTER (40bp), 5'UTR(110bp); GENE B | Glyma.18G216900 |
| GENE BODY                             | Glyma.18G299200 |
| GENE BODY                             | Glyma.19G006200 |

|                                |                 |
|--------------------------------|-----------------|
| PROMOTER                       | Glyma.19G011000 |
| GENE BODY                      | Glyma.19G117600 |
| GENE BODY                      | Glyma.19G124700 |
| PROMOTER                       | Glyma.19G156500 |
| GENE BODY (92bp); 3'UTR(108bp) | Glyma.19G185900 |
| 3'UTR (49bp)                   | Glyma.19G192300 |
| PROMOTER                       | Glyma.19G224000 |
| GENE BODY                      | Glyma.19G226000 |
| GENE BODY                      | Glyma.19G230000 |
| GENE BODY                      | Glyma.19G251700 |
| GENE BODY                      | Glyma.19G251800 |
| 3'UTR (164bp)                  | Glyma.19G252900 |
| 5'UTR(39bp); GENE BODY (161bp) | Glyma.20G005000 |
| PROMOTER                       | Glyma.20G010700 |
| 5'UTR                          | Glyma.20G024300 |
| PROMOTER                       | Glyma.20G027600 |
| PROMOTER                       | Glyma.20G030800 |
| PROMOTER                       | Glyma.20G094700 |
| GENE BODY                      | Glyma.20G104000 |
| 3'UTR                          | Glyma.20G104100 |
| PROMOTER                       | Glyma.20G118000 |
| PROMOTER                       | Glyma.20G140100 |
| GENE BODY                      | Glyma.20G178600 |
| 5'UTR                          | Glyma.20G182900 |
| GENE BODY                      | Glyma.20G198700 |
| PROMOTER                       | Glyma.20G235400 |
| PROMOTER                       | Glyma.20G241600 |
| PROMOTER                       | Glyma.U024600   |
| PROMOTER                       | Glyma.U032500   |
| PROMOTER                       | Glyma.U035000   |
| GENE BODY                      | Glyma.U036800   |

---

| <b>GENE ANNOTATION</b>                                                 | <b>methylation Differer</b> |
|------------------------------------------------------------------------|-----------------------------|
| UDP-glucosyl transferase 85A3                                          | -49.47368421                |
| myb-like transcription factor family protein                           | -42.30769231                |
| N/A                                                                    | -26.9620391                 |
| N/A                                                                    | -28.07766677                |
| N/A                                                                    | -53.75722543                |
| Nucleotidyltransferase family protein                                  | -31.66666667                |
| xyloglucanase 113                                                      | -83.83380205                |
| Histidine kinase-, DNA gyrase B-, and HSP90-like ATPase family protein | -30.26819923                |
| Phosphatidylinositol 3- and 4-kinase family protein with FAT domain    | -25.69892473                |
| Lactoylglutathione lyase / glyoxalase I family protein                 | -28.07129094                |
| Lactoylglutathione lyase / glyoxalase I family protein                 | -27.89048866                |
| Transducin/WD40 repeat-like superfamily protein                        | -25.52700415                |
| cytochrome P450, family 81, subfamily D, polypeptide 4                 | -32.12264151                |
| plastid ribosomal protein l11                                          | -31.11367719                |
| somatic embryogenesis receptor-like kinase 1                           | -38.11398575                |
| RNA-binding (RRM/RBD/RNP motifs) family protein                        | -25.24565382                |
| zinc ion binding                                                       | -40                         |
| DNA LIGASE 6                                                           | -67.35632184                |
| plant U-box 26                                                         | -25.5089717                 |
| Pentatricopeptide repeat (PPR) superfamily protein                     | -31.63265306                |
| phosphoenolpyruvate carboxylase 4                                      | -42.00971984                |
| 2-oxoglutarate (2OG) and Fe(II)-dependent oxygenase superfamily prc    | -25.34246575                |
| Zinc knuckle (CCHC-type) family protein                                | -30.89393939                |
| Thioesterase superfamily protein                                       | -80.625                     |
| Plant protein of unknown function (DUF828)                             | -39.03372646                |
| Pseudouridine synthase family protein                                  | -30.95085568                |
| UDP-Glycosyltransferase superfamily proteinMETHYLATED_REGION           | -50.15698587                |
| early nodulin-like protein 18                                          | -46.26370625                |
| N/A                                                                    | -32.52608048                |
| Protein of unknown function (DUF565)                                   | -44.9376947                 |
| Protein of unknown function (DUF565)                                   | -38.80034773                |
| rubisco activase                                                       | -30.23255814                |
| Cellulose-synthase-like C6                                             | -100                        |
| N/A                                                                    | -41.14583333                |
| DYNAMIN-like 1E                                                        | -34.95297806                |
| Plant protein of unknown function (DUF247)                             | -36.90360273                |
| transcription regulators                                               | -39.840842                  |
| lupeol synthase 2                                                      | -26.02678571                |
| Disease resistance-responsive (dirigent-like protein) family protein   | -26.01455698                |
| FASCICLIN-like arabinogalactan-protein 11                              | -44.93557087                |
| Protein of unknown function (DUF3511)                                  | -27.62414511                |

|                                                                    |              |
|--------------------------------------------------------------------|--------------|
| Li-tolerant lipase 1                                               | -43.52501169 |
| FMN-linked oxidoreductases superfamily protein                     | -27.30141309 |
| ATPase, F0/V0 complex, subunit C protein                           | -27.30141309 |
| Arabidopsis protein of unknown function (DUF241)                   | -27.40925886 |
| N/A                                                                | -28.63636364 |
| KNOTTED1-like homeobox gene 3                                      | -37.82230806 |
| Phox (PX) domain-containing protein                                | -31.73935891 |
| alpha/beta-Hydrolases superfamily protein                          | -25.3968254  |
| N/A                                                                | -30.01808318 |
| HAC13 protein (HAC13)                                              | -80.13157895 |
| Pectin lyase-like superfamily protein                              | -28.87657058 |
| glyceraldehyde-3-phosphate dehydrogenase C subunit 1               | -44.3175853  |
| RNA-metabolising metallo-beta-lactamase family protein             | -28.41234291 |
| Protein kinase superfamily protein                                 | -29.04233171 |
| Nucleotide-sugar transporter family protein                        | -71.53310105 |
| plastid transcriptionally active7                                  | -30.40229885 |
| 26S proteasome, regulatory subunit Rpn7;Proteasome component (P    | -36.28909809 |
| glycine-rich protein                                               | -40.54580897 |
| Transcription initiation factor IIF, beta subunit                  | -29.80769231 |
| FAD-binding Berberine family protein                               | -36.08654076 |
| Protein of unknown function, DUF538                                | -37.96440489 |
| NAD(P)-binding Rossmann-fold superfamily protein                   | -28.87307458 |
| annexin 5                                                          | -25.99302201 |
| BED zinc finger ;hAT family dimerisation domain                    | -30.14853648 |
| Chaperone DnaJ-domain superfamily protein                          | -80          |
| P-type ATPase of Arabidopsis 2                                     | -69.44136145 |
| WRKY DNA-binding protein 40                                        | -26.76767677 |
| RING/U-box superfamily protein                                     | -37.58865248 |
| N/A                                                                | -26.20844564 |
| FTSH protease 11                                                   | -35.77694236 |
| D111/G-patch domain-containing protein                             | -40.87504071 |
| PIF1 helicase                                                      | -32.1291866  |
| SET domain group 4                                                 | -38.38709677 |
| Transducin/WD40 repeat-like superfamily protein                    | -43.56435644 |
| multi-protein bridging factor 1B                                   | -29.72659486 |
| protein kinase C substrate, heavy chain-related                    | -25.64102564 |
| O-methyltransferase family protein                                 | -29.0805417  |
| N/A                                                                | -25.98357596 |
| N/A                                                                | -31.06796117 |
| aminopeptidase M1                                                  | -25.98484848 |
| CBL-interacting protein kinase 9                                   | -38.42105263 |
| S-adenosyl-L-methionine-dependent methyltransferases superfamily   | -36.86868687 |
| Late embryogenesis abundant (LEA) hydroxyproline-rich glycoprotein | -27.47252747 |



|                                                                    |              |
|--------------------------------------------------------------------|--------------|
| Fatty acid hydroxylase superfamily                                 | -31.18762475 |
| endoplasmic reticulum oxidoreductins 2                             | -30          |
| hexokinase 1                                                       | -25.43847385 |
| Alkaline-phosphatase-like family protein                           | -37.84652471 |
| NAD(P)-binding Rossmann-fold superfamily protein                   | -26.92307692 |
| SU(VAR)3-9 homolog 9                                               | -33.66503368 |
| N/A                                                                | -35.62172594 |
| 2-oxoglutarate (2OG) and Fe(II)-dependent oxygenase superfamily pr | -47.72727273 |
| cytochrome P450, family 707, subfamily A, polypeptide 4            | -26.60347985 |
| N/A                                                                | -27.46443409 |
| Sec14p-like phosphatidylinositol transfer family protein           | -30.45751634 |
| phosphate transporter 4;6                                          | -44.93251243 |
| Smg-4/UPF3 family protein                                          | -44.93251243 |
| BURP domain-containing protein                                     | -27.13235294 |
| Fibronectin type III domain-containing protein                     | -27.45257453 |
| general regulatory factor 9                                        | -30.93407873 |
| cytochrome P450, family 71, subfamily B, polypeptide 34            | -26.19937695 |
| Leucine-rich repeat transmembrane protein kinase protein           | -39.86842105 |
| Low PSII Accumulation 3                                            | -25.73336826 |
| cyclin-dependent kinase B1;2                                       | -27.20238095 |
| N/A                                                                | -35.3125     |
| SNF1 kinase homolog 10                                             | -27.8592545  |
| PIF1 helicase                                                      | -30.14824798 |
| phototropin 2                                                      | -28.90271493 |
| Nucleic acid-binding, OB-fold-like protein                         | -27.89983538 |
| ARF-GAP domain 8                                                   | -37.81773782 |
| kinesin like protein for actin based chloroplast movement 1        | -32.79722485 |
| Haloacid dehalogenase-like hydrolase (HAD) superfamily protein     | -28.49878935 |
| dolichol-phosphate mannosyltransferase-related                     | -38.59649123 |
| RINT-1 / TIP-1 family                                              | -35.11689417 |
| LYR family of Fe/S cluster biogenesis protein                      | -35.44180885 |
| cytochrome P450, family 81, subfamily D, polypeptide 3             | -36.56923405 |
| lectin protein kinase family protein                               | -28.65693584 |
| alfin-like 5                                                       | -59.15254237 |
| N/A                                                                | -33.28379224 |
| Aha1 domain-containing protein                                     | -25.95238095 |
| fatty acid desaturase 2                                            | -36.70833333 |
| N/A                                                                | -70          |
| N/A                                                                | -25.92342342 |
| plastidic pyruvate kinase beta subunit 1                           | -25.36873156 |
| Microtubule associated protein (MAP65/ASE1) family protein         | -33.02459763 |
| Tetratricopeptide repeat (TPR)-like superfamily protein            | -46.8627451  |
| Reticulon family protein                                           | -41.03899573 |

|                                                                        |              |
|------------------------------------------------------------------------|--------------|
| associated molecule with the SH3 domain of STAM 1                      | -37.47987118 |
| S-adenosyl-L-methionine-dependent methyltransferases superfamily       | -26.86433528 |
| Protein of unknown function (DUF3245)                                  | -25.5036208  |
| N/A                                                                    | -26.6226138  |
| Outer membrane OMP85 family protein                                    | -27.07143361 |
| N/A                                                                    | -30.4964539  |
| phosphatidyl inositol monophosphate 5 kinase                           | -26.4957265  |
| N/A                                                                    | -28.18766393 |
| Transducin/WD40 repeat-like superfamily protein                        | -26.77433694 |
| Nucleolar histone methyltransferase-related protein                    | -28.77894737 |
| N/A                                                                    | -29.62992889 |
| N/A                                                                    | -41.66666667 |
| fatty alcohol oxidase 3                                                | -28.86102403 |
| ribosomal protein L6 family protein                                    | -32.6899456  |
| tubulin beta 8                                                         | -43.98335583 |
| Aluminium induced protein with YGL and LRDR motifs                     | -27.59076531 |
| Cupredoxin superfamily protein                                         | -54.24528302 |
| Ribosomal protein S5 family protein                                    | -26.52412281 |
| Ribosomal protein S5 family protein                                    | -27.44488412 |
| ralf-like 34                                                           | -35.76923077 |
| Pyridoxal phosphate (PLP)-dependent transferases superfamily protei    | -32.49249249 |
| beta glucosidase 13                                                    | -26.49859944 |
| SEC14 cytosolic factor family protein / phosphoglyceride transfer fami | -28.45827961 |
| cleavage and polyadenylation specificity factor 100                    | -33.67521368 |
| homolog of histone chaperone HIRA                                      | -32.45415207 |
| DNA ligase 1                                                           | -28.8814751  |
| Phototropic-responsive NPH3 family protein                             | -28.91772735 |
| receptor kinase 3                                                      | -28.71496563 |
| K-box region and MADS-box transcription factor family protein          | -37.45045188 |
| N/A                                                                    | -28.10522811 |
| cytochrome BC1 synthesis                                               | -34.86756106 |
| pfkB-like carbohydrate kinase family protein                           | -50.58201058 |
| RING/U-box superfamily protein                                         | -40.8496732  |
| PIF1 helicase                                                          | -25.77186964 |
| S-locus lectin protein kinase family protein                           | -41.50943396 |
| ARF-GAP domain 5                                                       | -29.09132007 |
| Exostosin family protein                                               | -40.1299505  |
| S-locus lectin protein kinase family protein                           | -34.04862317 |
| terpene synthase 21                                                    | -33.75764994 |
| Seven transmembrane MLO family protein                                 | -46.66666667 |
| Leucine-rich repeat transmembrane protein kinase                       | -30.77211394 |
| senescence-related gene 1                                              | -28.06172322 |
| N/A                                                                    | -25.89222615 |

|                                                                      |              |
|----------------------------------------------------------------------|--------------|
| N/A                                                                  | -25.27718802 |
| N/A                                                                  | -37.75946276 |
| BTB/POZ domain-containing protein                                    | -25.09070449 |
| PIF1 helicase                                                        | -25.8382832  |
| NOD26-like intrinsic protein 1;2                                     | -40.77109897 |
| lysine-ketoglutarate reductase/saccharopine dehydrogenase bifunctic  | -37.40653863 |
| GDSL-like Lipase/Acylhydrolase superfamily protein                   | -35.12817125 |
| N/A                                                                  | -37.78901855 |
| N/A                                                                  | -29.76506252 |
| D111/G-patch domain-containing protein                               | -27.91664294 |
| Tetratricopeptide repeat (TPR)-like superfamily protein              | -39.44444444 |
| Homeodomain-like transcriptional regulator                           | -51.51515152 |
| interactor of constitutive active rops 1                             | -31.88932981 |
| P-loop containing nucleoside triphosphate hydrolases superfamily pro | -43.33333333 |
| BURP domain-containing protein                                       | -45.95393253 |
| N/A                                                                  | -47.87878788 |
| Tetratricopeptide repeat (TPR)-like superfamily protein              | -48.29956156 |
| Calcium-dependent phosphotriesterase superfamily protein             | -48.29956156 |
| RNA methyltransferase family protein                                 | -38.88888889 |
| Leucine-rich repeat family protein                                   | -29.30094386 |
| GPI transamidase component Gpi16 subunit family protein              | -25.12768131 |
| autoinhibited Ca(2+)-ATPase 9                                        | -75.75757576 |
| F-box protein 2                                                      | -33.33333333 |
| sorting nexin 2B                                                     | -26.84556696 |
| N/A                                                                  | -35.71428571 |
| cullin 1                                                             | -30.84571852 |
| Protein of unknown function (DUF1218)                                | -31.02275538 |
| N/A                                                                  | -28.28455458 |
| disease resistance protein (TIR-NBS-LRR class), putative             | -42.37762238 |
| ER lumen protein retaining receptor family protein                   | -37.61276374 |
| phosphoenolpyruvate carboxylase-related kinase 2                     | -27.20848057 |
| WRKY DNA-binding protein 4                                           | -38.10786914 |
| O-methyltransferase family protein                                   | -29.6875     |
| P-loop containing nucleoside triphosphate hydrolases superfamily pro | -31.71101017 |
| casein kinase 1-like protein 2                                       | -32.07920792 |
| N/A                                                                  | -25.60825377 |
| N/A                                                                  | -28.15934066 |
| emp24/gp25L/p24 family/GOLD family protein                           | -27.69024817 |
| K-box region and MADS-box transcription factor family protein        | -41.0130719  |
| aldehyde dehydrogenase 6B2                                           | -46.04519774 |
| Aluminium induced protein with YGL and LRDR motifs                   | -27.56201129 |
| Plant invertase/pectin methylesterase inhibitor superfamily protein  | -38.4496124  |
| Drought-responsive family protein                                    | -29.07779791 |

|                                                                      |              |
|----------------------------------------------------------------------|--------------|
| DNA binding;DNA-directed RNA polymerases                             | -26.12179487 |
| homolog of CFIM-25                                                   | -37.44377811 |
| Outer arm dynein light chain 1 protein                               | -26.70977011 |
| cation-chloride co-transporter 1                                     | -27.63377926 |
| S-locus lectin protein kinase family protein                         | -43.64295125 |
| N/A                                                                  | -41.76319176 |
| NB-ARC domain-containing disease resistance protein                  | -25.96153846 |
| Family of unknown function (DUF572)                                  | -56.15079365 |
| N/A                                                                  | -26.75       |
| Lojap-related protein                                                | -31.05921089 |
| BED zinc finger ;hAT family dimerisation domain                      | -43.66197183 |
| alpha/beta-Hydrolases superfamily protein                            | -25.24938829 |
| translocase inner membrane subunit 17-2                              | -43.77300408 |
| N/A                                                                  | -27.83411807 |
| Protein of unknown function (DUF674)                                 | -27.83411807 |
| Endoribonuclease/protein kinase IRE1-like                            | -35.21380345 |
| Disease resistance protein (TIR-NBS-LRR class) family                | -31.02380952 |
| HXXXD-type acyl-transferase family protein                           | -25.62230335 |
| CBS domain-containing protein with a domain of unknown function (C   | -31.47514105 |
| multifunctional protein 2                                            | -27.40046838 |
| F-box family protein                                                 | -29.87109137 |
| Auxin efflux carrier family protein                                  | -26.63776114 |
| Core-2/I-branching beta-1,6-N-acetylglucosaminyltransferase family p | -28.18181818 |
| N/A                                                                  | -29.11681371 |
| N/A                                                                  | -44.48346503 |
| Ypt/Rab-GAP domain of gyp1p superfamily protein                      | -30.34429099 |
| RING/FYVE/PHD zinc finger superfamily protein                        | -42.57567105 |
| N/A                                                                  | -30.70265166 |
| Exostosin family protein                                             | -36.4673913  |
| ADR1-like 1                                                          | -35.68438003 |
| N/A                                                                  | -51.09489051 |
| Lojap-related protein                                                | -31.5362841  |
| P-glycoprotein 18                                                    | -70.41420118 |
| NB-ARC domain-containing disease resistance protein                  | -25.35211268 |
| EAP30/Vps36 family protein                                           | -26.49350649 |
| N/A                                                                  | -31.11111111 |
| Major facilitator superfamily protein                                | -25.75276445 |
| eukaryotic translation initiation factor 3G1                         | -42.54716981 |
| Xanthine/uracil permease family protein                              | -64.86318408 |
| DIE2/ALG10 family                                                    | -31.99974395 |
| nuclear shuttle interacting                                          | -32.73167358 |
| Major facilitator superfamily protein                                | -30.85585586 |
| Pectin lyase-like superfamily protein                                | -26.5445801  |

|                                                                      |              |
|----------------------------------------------------------------------|--------------|
| NHL domain-containing protein                                        | -27.84008046 |
| Core-2/I-branching beta-1,6-N-acetylglucosaminyltransferase family p | -29.57844251 |
| alpha-L-arabinofuranosidase 1                                        | -54.54545455 |
| N/A                                                                  | -30.76443155 |
| alpha carbonic anhydrase 7                                           | -31.89840723 |
| Duplicated homeodomain-like superfamily protein                      | -35.32163743 |
| Translation initiation factor 2, small GTP-binding protein           | -53.22580645 |
| Protein kinase superfamily protein                                   | -31.05413105 |
| Polynucleotidyl transferase, ribonuclease H-like superfamily protein | -30.06993007 |
| PIN domain-like family protein                                       | -60          |
| N/A                                                                  | -60          |
| N/A                                                                  | -46.68067227 |
| N/AMETHYLATED_REGION                                                 | -36.36875123 |
| N/A                                                                  | -45.92397275 |
| DNAJ heat shock N-terminal domain-containing protein                 | -30.96660031 |
| N/A                                                                  | -37.23076923 |
| N/A                                                                  | -33.03240741 |
| pentatricopeptide (PPR) repeat-containing protein                    | -37.77777778 |
| thioredoxin X                                                        | -42.29607251 |
| N/A                                                                  | -42.29607251 |
| Metallo-hydrolase/oxidoreductase superfamily protein                 | -51.25       |
| cysteine-rich RLK (RECEPTOR-like protein kinase) 25                  | -26.35332435 |
| serine carboxypeptidase-like 27                                      | -40.60606061 |
| N/A                                                                  | -33.15942029 |
| N/A                                                                  | -25.0113413  |
| P-loop containing nucleoside triphosphate hydrolases superfamily pro | -33.60215892 |
| Chalcone-flavanone isomerase family protein                          | -66.00498487 |
| Carbohydrate-binding-like fold                                       | -36.07769424 |
| uricase / urate oxidase / nodulin 35, putative                       | -42.5990676  |
| N/A                                                                  | -72.91157441 |
| GroES-like zinc-binding dehydrogenase family protein                 | -80.95238095 |

---

| q value     | P value     |
|-------------|-------------|
| 0.000214557 | 5.23789E-07 |
| 0.00867934  | 8.55033E-05 |
| 0.004126839 | 2.93584E-05 |
| 1.90E-06    | 1.40716E-09 |
| 2.43E-11    | 3.05611E-15 |
| 0.000521764 | 1.70647E-06 |
| 4.27E-48    | 2.17042E-54 |
| 0.005036561 | 3.88024E-05 |
| 0.007356445 | 6.72406E-05 |
| 3.78E-12    | 3.33967E-16 |
| 0.00183603  | 9.35492E-06 |
| 5.31329E-05 | 8.81033E-08 |
| 6.59E-08    | 2.4484E-11  |
| 6.62E-12    | 6.51884E-16 |
| 0.000376343 | 1.10204E-06 |
| 6.0915E-05  | 1.04223E-07 |
| 0.00494168  | 3.77477E-05 |
| 0.002992509 | 1.86277E-05 |
| 0.008115221 | 7.76339E-05 |
| 0.001500738 | 7.13074E-06 |
| 2.05118E-05 | 2.66259E-08 |
| 0.007649235 | 7.12959E-05 |
| 0.003303984 | 2.14374E-05 |
| 7.49481E-05 | 1.35694E-07 |
| 8.26E-07    | 5.12771E-10 |
| 0.00035838  | 1.03233E-06 |
| 1.83355E-05 | 2.30839E-08 |
| 4.06E-20    | 5.15698E-25 |
| 3.46E-09    | 8.2963E-13  |
| 0.006687833 | 5.84878E-05 |
| 0.000411704 | 1.24385E-06 |
| 5.36E-12    | 5.1136E-16  |
| 4.05E-22    | 3.49343E-27 |
| 0.002814342 | 1.70141E-05 |
| 0.000354245 | 1.01682E-06 |
| 0.000201432 | 4.8121E-07  |
| 1.93E-16    | 4.99224E-21 |
| 0.003070238 | 1.93314E-05 |
| 0.000149301 | 3.26192E-07 |
| 4.94E-17    | 1.15309E-21 |
| 0.000388687 | 1.15023E-06 |

|             |             |
|-------------|-------------|
| 2.29482E-05 | 3.07559E-08 |
| 0.007329095 | 6.68789E-05 |
| 0.007329095 | 6.68789E-05 |
| 7.02E-12    | 6.98378E-16 |
| 1.01E-07    | 4.08327E-11 |
| 1.00E-06    | 6.47962E-10 |
| 0.006206255 | 5.25008E-05 |
| 0.005467109 | 4.36687E-05 |
| 0.00065089  | 2.28647E-06 |
| 4.46743E-05 | 7.05825E-08 |
| 0.002669057 | 1.58145E-05 |
| 0.009942255 | 0.000104024 |
| 0.000269459 | 7.09819E-07 |
| 0.006237738 | 5.28551E-05 |
| 0.000957331 | 3.86079E-06 |
| 0.007264795 | 6.59934E-05 |
| 2.80E-06    | 2.30753E-09 |
| 1.42E-07    | 6.16521E-11 |
| 0.000466478 | 1.46927E-06 |
| 1.04335E-05 | 1.15617E-08 |
| 1.24E-10    | 1.93564E-14 |
| 0.006790648 | 5.98308E-05 |
| 0.006942027 | 6.17816E-05 |
| 1.27E-08    | 3.72288E-12 |
| 2.29E-07    | 1.09835E-10 |
| 1.89E-16    | 4.79168E-21 |
| 0.006032049 | 5.04028E-05 |
| 0.000733326 | 2.67772E-06 |
| 7.18262E-05 | 1.28436E-07 |
| 4.71E-08    | 1.66274E-11 |
| 2.94E-06    | 2.44673E-09 |
| 0.002717151 | 1.62016E-05 |
| 0.000688034 | 2.45538E-06 |
| 0.004404594 | 3.20748E-05 |
| 0.004466416 | 3.27223E-05 |
| 0.000615827 | 2.12404E-06 |
| 0.002067843 | 1.10711E-05 |
| 0.000576013 | 1.94708E-06 |
| 2.07E-30    | 3.15677E-36 |
| 0.006262565 | 5.31393E-05 |
| 0.007394621 | 6.77961E-05 |
| 9.55052E-05 | 1.83175E-07 |
| 3.26604E-05 | 4.78029E-08 |

|             |             |
|-------------|-------------|
| 0.003062898 | 1.92727E-05 |
| 0.007452525 | 6.85503E-05 |
| 2.69E-12    | 2.25081E-16 |
| 0.002136184 | 1.15577E-05 |
| 0.000639927 | 2.23658E-06 |
| 0.000121424 | 2.49685E-07 |
| 1.03E-08    | 2.91112E-12 |
| 4.57997E-05 | 7.27792E-08 |
| 3.14E-09    | 7.42633E-13 |
| 1.73E-07    | 7.86291E-11 |
| 7.88398E-05 | 1.44188E-07 |
| 2.16E-06    | 1.65923E-09 |
| 2.16E-06    | 1.65923E-09 |
| 1.61E-18    | 2.54054E-23 |
| 4.93719E-05 | 8.04315E-08 |
| 0.001406831 | 6.53368E-06 |
| 7.75246E-05 | 1.415E-07   |
| 0.0033077   | 2.14733E-05 |
| 0.000991912 | 4.04559E-06 |
| 0.001156348 | 4.97278E-06 |
| 0.003405725 | 2.24019E-05 |
| 3.52E-11    | 4.80513E-15 |
| 0.008425597 | 8.1874E-05  |
| 0.000711638 | 2.56817E-06 |
| 0.004059176 | 2.86338E-05 |
| 3.50E-16    | 9.76647E-21 |
| 7.40E-06    | 7.67216E-09 |
| 0.003753498 | 2.56922E-05 |
| 5.06E-13    | 3.64692E-17 |
| 2.87E-16    | 7.639E-21   |
| 6.62E-06    | 6.6555E-09  |
| 0.002004305 | 1.0595E-05  |
| 2.18E-06    | 1.67517E-09 |
| 0.000126172 | 2.6342E-07  |
| 1.59E-07    | 7.07609E-11 |
| 1.88453E-05 | 2.38788E-08 |
| 0.000156609 | 3.48281E-07 |
| 6.98183E-05 | 1.23782E-07 |
| 0.000679328 | 2.41983E-06 |
| 0.001271237 | 5.64769E-06 |
| 1.22E-07    | 5.12659E-11 |
| 8.92759E-05 | 1.68344E-07 |
| 8.76E-08    | 3.43843E-11 |



|             |             |
|-------------|-------------|
| 0.000775922 | 2.89513E-06 |
| 4.16E-07    | 2.22759E-10 |
| 0.000594029 | 2.02488E-06 |
| 0.003821711 | 2.63512E-05 |
| 2.99E-20    | 3.38267E-25 |
| 0.005851584 | 4.81558E-05 |
| 0.006325378 | 5.39165E-05 |
| 0.000406849 | 1.2234E-06  |
| 4.36662E-05 | 6.8502E-08  |
| 7.38867E-05 | 1.33172E-07 |
| 0.004337158 | 3.14229E-05 |
| 0.000639597 | 2.2338E-06  |
| 0.00042248  | 1.28714E-06 |
| 1.58E-06    | 1.13244E-09 |
| 3.09E-09    | 7.28271E-13 |
| 2.50E-06    | 1.99762E-09 |
| 0.000376448 | 1.1029E-06  |
| 4.04E-08    | 1.38629E-11 |
| 0.00957227  | 9.84952E-05 |
| 0.007671471 | 7.16356E-05 |
| 1.28E-07    | 5.45277E-11 |
| 2.55799E-05 | 3.52831E-08 |
| 3.26E-06    | 2.78041E-09 |
| 1.40098E-05 | 1.66631E-08 |
| 0.003601836 | 2.42498E-05 |
| 4.66678E-05 | 7.46565E-08 |
| 1.79E-11    | 2.10584E-15 |
| 0.003330041 | 2.1669E-05  |
| 0.001386338 | 6.40178E-06 |
| 0.000191201 | 4.50652E-07 |
| 8.21332E-05 | 1.51914E-07 |
| 0.002499077 | 1.44749E-05 |
| 2.05E-10    | 3.41132E-14 |
| 0.003791286 | 2.60551E-05 |
| 3.51349E-05 | 5.22633E-08 |
| 0.000281564 | 7.51431E-07 |
| 2.72583E-05 | 3.84011E-08 |
| 6.03E-07    | 3.47802E-10 |
| 0.000309625 | 8.48334E-07 |
| 1.56E-07    | 6.85519E-11 |
| 0.001515491 | 7.22162E-06 |
| 0.00049531  | 1.59304E-06 |
| 8.78E-07    | 5.54152E-10 |

|             |             |
|-------------|-------------|
| 0.003624911 | 2.44862E-05 |
| 2.28006E-05 | 3.05002E-08 |
| 6.37E-09    | 1.65325E-12 |
| 0.005197601 | 4.0674E-05  |
| 4.36857E-05 | 6.85769E-08 |
| 0.000946387 | 3.79934E-06 |
| 3.91E-09    | 9.54433E-13 |
| 2.78E-11    | 3.58589E-15 |
| 3.56359E-05 | 5.34068E-08 |
| 1.11E-07    | 4.56176E-11 |
| 0.005983362 | 4.97599E-05 |
| 0.001166073 | 5.03242E-06 |
| 8.90E-14    | 4.83429E-18 |
| 3.01E-07    | 1.51503E-10 |
| 1.25E-17    | 2.48234E-22 |
| 6.31017E-05 | 1.09279E-07 |
| 1.51E-08    | 4.52304E-12 |
| 1.51E-08    | 4.52304E-12 |
| 0.002379863 | 1.35136E-05 |
| 1.03E-18    | 1.56201E-23 |
| 0.001982337 | 1.04439E-05 |
| 3.78E-12    | 3.38919E-16 |
| 0.000692662 | 2.47858E-06 |
| 0.00032339  | 8.99516E-07 |
| 0.000850746 | 3.28016E-06 |
| 1.47E-09    | 3.15044E-13 |
| 7.41E-06    | 7.68396E-09 |
| 0.003180295 | 2.03587E-05 |
| 0.001610535 | 7.84546E-06 |
| 6.80E-06    | 6.88697E-09 |
| 4.31E-09    | 1.06025E-12 |
| 1.86E-08    | 5.71297E-12 |
| 1.67536E-05 | 2.06414E-08 |
| 0.000241156 | 6.10833E-07 |
| 2.23E-28    | 6.78936E-34 |
| 3.5484E-05  | 5.30169E-08 |
| 0.000509566 | 1.65416E-06 |
| 0.008824935 | 8.76413E-05 |
| 6.29E-06    | 6.23898E-09 |
| 2.18E-06    | 1.67225E-09 |
| 0.000295801 | 8.00393E-07 |
| 2.38E-07    | 1.15327E-10 |
| 2.70551E-05 | 3.79912E-08 |

|             |             |
|-------------|-------------|
| 9.94E-07    | 6.4095E-10  |
| 0.000569755 | 1.91985E-06 |
| 0.001104377 | 4.66705E-06 |
| 6.47E-07    | 3.78981E-10 |
| 0.001448062 | 6.79174E-06 |
| 1.37E-07    | 5.91722E-11 |
| 0.008774511 | 8.68731E-05 |
| 1.12E-06    | 7.35589E-10 |
| 2.29779E-05 | 3.08073E-08 |
| 1.46572E-06 | 1.03319E-09 |
| 0.000209491 | 5.07566E-07 |
| 2.29E-07    | 1.10348E-10 |
| 9.15E-08    | 3.64649E-11 |
| 0.009386163 | 9.58036E-05 |
| 0.009386163 | 9.58036E-05 |
| 0.002058826 | 1.10079E-05 |
| 1.16155E-05 | 1.31833E-08 |
| 0.000306799 | 8.36889E-07 |
| 1.34359E-05 | 1.57827E-08 |
| 2.26E-08    | 7.11949E-12 |
| 1.70661E-05 | 2.11217E-08 |
| 6.56E-09    | 1.71198E-12 |
| 0.003315973 | 2.15522E-05 |
| 2.40E-10    | 4.08646E-14 |
| 5.64E-06    | 5.44338E-09 |
| 0.000112111 | 2.24898E-07 |
| 0.003017536 | 1.888E-05   |
| 2.01837E-05 | 2.60873E-08 |
| 3.48577E-05 | 5.17095E-08 |
| 0.000448077 | 1.39175E-06 |
| 1.13E-11    | 1.24256E-15 |
| 6.51E-08    | 2.41075E-11 |
| 0.001984978 | 1.04649E-05 |
| 0.004528533 | 3.33725E-05 |
| 0.000414166 | 1.25234E-06 |
| 0.003980985 | 2.78746E-05 |
| 0.00013003  | 2.73192E-07 |
| 0.003301486 | 2.14128E-05 |
| 1.70E-06    | 1.23044E-09 |
| 3.03E-08    | 9.96807E-12 |
| 0.000386208 | 1.14054E-06 |
| 6.60E-07    | 3.8869E-10  |
| 4.25E-13    | 2.89179E-17 |

|             |             |
|-------------|-------------|
| 0.000534963 | 1.76322E-06 |
| 2.22E-07    | 1.06075E-10 |
| 0.004932584 | 3.76482E-05 |
| 1.96E-08    | 6.07591E-12 |
| 2.26E-06    | 1.7561E-09  |
| 0.001012789 | 4.14977E-06 |
| 7.40109E-07 | 4.51417E-10 |
| 5.34E-06    | 5.07192E-09 |
| 1.67E-06    | 1.2086E-09  |
| 0.000877666 | 3.41605E-06 |
| 0.000877666 | 3.41605E-06 |
| 1.43E-14    | 6.62673E-19 |
| 4.02E-16    | 1.22356E-20 |
| 2.58549E-05 | 3.57413E-08 |
| 4.35097E-05 | 6.81901E-08 |
| 0.000261045 | 6.79967E-07 |
| 7.86E-09    | 2.12228E-12 |
| 0.002427585 | 1.38818E-05 |
| 2.26154E-05 | 3.01146E-08 |
| 2.26154E-05 | 3.01146E-08 |
| 0.008757372 | 8.6617E-05  |
| 0.000255436 | 6.59259E-07 |
| 0.00046218  | 1.45194E-06 |
| 0.000359561 | 1.03683E-06 |
| 4.94954E-05 | 8.0688E-08  |
| 2.33E-11    | 2.9228E-15  |
| 1.13E-13    | 6.43181E-18 |
| 1.79E-07    | 8.21974E-11 |
| 3.99E-07    | 2.1117E-10  |
| 7.19E-22    | 6.94041E-27 |
| 0.003422193 | 2.25694E-05 |

---

## **Supplemental Table 8: List of 703 unique hyper-methylated genes**

### **METHYLATED REGIONS**

---

mytileDiff25p200.hyper\_CpG.Chr01.422401-422600  
mytileDiff25p200.hyper\_CpG.Chr01.2841001-2841200  
mytileDiff25p200.hyper\_CpG.Chr01.3016201-3016400  
mytileDiff25p200.hyper\_merged\_CHG.Chr01.3247801-3248000  
mytileDiff25p200.hyper\_merged\_CHH.Chr01.3576801-3577000  
mytileDiff25p200.hyper\_merged\_CHG.Chr01.3809801-3810000  
mytileDiff25p200.hyper\_CpG.Chr01.4030601-4030800  
mytileDiff25p200.hyper\_CpG.Chr01.5279201-5279400  
mytileDiff25p200.hyper\_merged\_CHH.Chr01.11564801-11565000  
mytileDiff25p200.hyper\_CpG.Chr01.14063401-14063600  
mytileDiff25p200.hyper\_merged\_CHG.Chr01.14059801-14060000  
mytileDiff25p200.hyper\_CpG.Chr01.16538001-16538200  
mytileDiff25p200.hyper\_CpG.Chr01.27007401-27007600  
mytileDiff25p200.hyper\_merged\_CHG.Chr01.27947801-27948000  
mytileDiff25p200.hyper\_merged\_CHG.Chr01.28296001-28296200  
mytileDiff25p200.hyper\_merged\_CHH.Chr01.37634201-37634400  
mytileDiff25p200.hyper\_CpG.Chr01.38062001-38062200  
mytileDiff25p200.hyper\_merged\_CHG.Chr01.39914801-39915000  
mytileDiff25p200.hyper\_CpG.Chr01.46839601-46839800  
mytileDiff25p200.hyper\_CpG.Chr01.46839601-46839800  
mytileDiff25p200.hyper\_merged\_CHH.Chr01.48025201-48025400  
mytileDiff25p200.hyper\_CpG.Chr01.49566001-49566200  
mytileDiff25p200.hyper\_CpG.Chr01.50644001-50644200  
mytileDiff25p200.hyper\_CpG.Chr01.50750201-50750400  
mytileDiff25p200.hyper\_CpG.Chr01.51017001-51017200  
mytileDiff25p200.hyper\_merged\_CHH.Chr01.51017001-51017200  
mytileDiff25p200.hyper\_merged\_CHG.Chr01.51419601-51419800  
mytileDiff25p200.hyper\_CpG.Chr01.51872001-51872200  
mytileDiff25p200.hyper\_CpG.Chr01.52398001-52398200  
mytileDiff25p200.hyper\_merged\_CHG.Chr01.54098201-54098400  
mytileDiff25p200.hyper\_CpG.Chr01.54133801-54134000  
mytileDiff25p200.hyper\_merged\_CHG.Chr01.56514201-56514400  
mytileDiff25p200.hyper\_CpG.Chr01.56740801-56741000  
mytileDiff25p200.hyper\_CpG.Chr02.816801-817000  
mytileDiff25p200.hyper\_CpG.Chr02.826801-827000  
mytileDiff25p200.hyper\_CpG.Chr02.1085201-1085400  
mytileDiff25p200.hyper\_CpG.Chr02.1285001-1285200  
mytileDiff25p200.hyper\_merged\_CHG.Chr02.3944201-3944400  
mytileDiff25p200.hyper\_CpG.Chr02.3988001-3988200  
mytileDiff25p200.hyper\_merged\_CHG.Chr02.4705401-4705600  
mytileDiff25p200.hyper\_CpG.Chr02.4982601-4982800  
mytileDiff25p200.hyper\_CpG.Chr02.6778801-6779000  
mytileDiff25p200.hyper\_CpG.Chr02.6899401-6899600  
mytileDiff25p200.hyper\_merged\_CHH.Chr02.7246401-7246600

mytileDiff25p200.hyper\_merged\_CHH.Chr02.7246401-7246600  
mytileDiff25p200.hyper\_merged\_CHG.Chr02.8446601-8446800  
mytileDiff25p200.hyper\_CpG.Chr02.8524601-8524800  
mytileDiff25p200.hyper\_CpG.Chr02.8735001-8735200  
mytileDiff25p200.hyper\_merged\_CHG.Chr02.8836201-8836400  
mytileDiff25p200.hyper\_CpG.Chr02.9714001-9714200  
mytileDiff25p200.hyper\_CpG.Chr02.10252601-10252800  
mytileDiff25p200.hyper\_CpG.Chr02.11023001-11023200  
mytileDiff25p200.hyper\_merged\_CHH.Chr02.11742001-11742200  
mytileDiff25p200.hyper\_merged\_CHG.Chr02.11813801-11814000  
mytileDiff25p200.hyper\_merged\_CHH.Chr02.12151801-12152000  
mytileDiff25p200.hyper\_CpG.Chr02.12959201-12959400  
mytileDiff25p200.hyper\_CpG.Chr02.13183401-13183600  
mytileDiff25p200.hyper\_merged\_CHG.Chr02.13182001-13182200  
mytileDiff25p200.hyper\_merged\_CHG.Chr02.13256601-13256800  
mytileDiff25p200.hyper\_merged\_CHG.Chr02.13400201-13400400  
mytileDiff25p200.hyper\_CpG.Chr02.13622001-13622200  
mytileDiff25p200.hyper\_CpG.Chr02.14151201-14151400  
mytileDiff25p200.hyper\_merged\_CHG.Chr02.14173401-14173600  
mytileDiff25p200.hyper\_merged\_CHH.Chr02.14365201-14365400  
mytileDiff25p200.hyper\_merged\_CHH.Chr02.14631601-14631800  
mytileDiff25p200.hyper\_merged\_CHG.Chr02.21064601-21064800  
mytileDiff25p200.hyper\_merged\_CHG.Chr02.24762401-24762600  
mytileDiff25p200.hyper\_merged\_CHG.Chr02.26134801-26135000  
mytileDiff25p200.hyper\_merged\_CHG.Chr02.26356201-26356400  
mytileDiff25p200.hyper\_CpG.Chr02.31200201-31200400  
mytileDiff25p200.hyper\_CpG.Chr02.31238201-31238400  
mytileDiff25p200.hyper\_merged\_CHH.Chr02.33475001-33475200  
mytileDiff25p200.hyper\_merged\_CHG.Chr02.35290201-35290400  
mytileDiff25p200.hyper\_merged\_CHG.Chr02.35678401-35678600  
mytileDiff25p200.hyper\_merged\_CHH.Chr02.35782801-35783000  
mytileDiff25p200.hyper\_merged\_CHG.Chr02.38833001-38833200  
mytileDiff25p200.hyper\_CpG.Chr02.39710601-39710800  
mytileDiff25p200.hyper\_CpG.Chr02.40121801-40122000  
mytileDiff25p200.hyper\_merged\_CHG.Chr02.40121801-40122000  
mytileDiff25p200.hyper\_CpG.Chr02.41137001-41137200  
mytileDiff25p200.hyper\_CpG.Chr02.42040001-42040200  
mytileDiff25p200.hyper\_CpG.Chr02.43332201-43332400  
mytileDiff25p200.hyper\_merged\_CHG.Chr02.43946401-43946600  
mytileDiff25p200.hyper\_CpG.Chr02.44468201-44468400  
mytileDiff25p200.hyper\_merged\_CHH.Chr02.44605001-44605200  
mytileDiff25p200.hyper\_merged\_CHG.Chr02.47075201-47075400  
mytileDiff25p200.hyper\_CpG.Chr02.47734801-47735000  
mytileDiff25p200.hyper\_CpG.Chr03.259401-259600  
mytileDiff25p200.hyper\_CpG.Chr03.439401-439600

mytileDiff25p200.hyper\_merged\_CHG.Chr03.791401-791600  
mytileDiff25p200.hyper\_CpG.Chr03.1328201-1328400  
mytileDiff25p200.hyper\_merged\_CHH.Chr03.1372601-1372800  
mytileDiff25p200.hyper\_merged\_CHG.Chr03.1440001-1440200  
mytileDiff25p200.hyper\_merged\_CHH.Chr03.1440001-1440200  
mytileDiff25p200.hyper\_CpG.Chr03.2288001-2288200  
mytileDiff25p200.hyper\_CpG.Chr03.2428801-2429000  
mytileDiff25p200.hyper\_merged\_CHG.Chr03.6985801-6986000  
mytileDiff25p200.hyper\_merged\_CHH.Chr03.7315801-7316000  
mytileDiff25p200.hyper\_merged\_CHG.Chr03.8509601-8509800  
mytileDiff25p200.hyper\_merged\_CHG.Chr03.9050601-9050800  
mytileDiff25p200.hyper\_CpG.Chr03.10607201-10607400  
mytileDiff25p200.hyper\_merged\_CHG.Chr03.29196801-29197000  
mytileDiff25p200.hyper\_merged\_CHG.Chr03.29376601-29376800  
mytileDiff25p200.hyper\_CpG.Chr03.29818801-29819000  
mytileDiff25p200.hyper\_merged\_CHH.Chr03.33605201-33605400  
mytileDiff25p200.hyper\_CpG.Chr03.34692601-34692800  
mytileDiff25p200.hyper\_merged\_CHG.Chr03.34800801-34801000  
mytileDiff25p200.hyper\_CpG.Chr03.34912601-34912800  
mytileDiff25p200.hyper\_CpG.Chr03.35637001-35637200  
mytileDiff25p200.hyper\_merged\_CHG.Chr03.35717601-35717800  
mytileDiff25p200.hyper\_CpG.Chr03.36611201-36611400  
mytileDiff25p200.hyper\_merged\_CHH.Chr03.37332401-37332600  
mytileDiff25p200.hyper\_CpG.Chr03.38305001-38305200  
mytileDiff25p200.hyper\_CpG.Chr03.40418601-40418800  
mytileDiff25p200.hyper\_merged\_CHH.Chr03.41763001-41763200  
mytileDiff25p200.hyper\_CpG.Chr03.42298801-42299000  
mytileDiff25p200.hyper\_CpG.Chr03.43149201-43149400  
mytileDiff25p200.hyper\_merged\_CHH.Chr03.43910201-43910400  
mytileDiff25p200.hyper\_CpG.Chr03.44113601-44113800  
mytileDiff25p200.hyper\_CpG.Chr03.44139201-44139400  
mytileDiff25p200.hyper\_CpG.Chr03.44620401-44620600  
mytileDiff25p200.hyper\_CpG.Chr03.45118401-45118600  
mytileDiff25p200.hyper\_CpG.Chr04.466401-466600  
mytileDiff25p200.hyper\_CpG.Chr04.1111401-1111600  
mytileDiff25p200.hyper\_merged\_CHH.Chr04.1509401-1509600  
mytileDiff25p200.hyper\_CpG.Chr04.2527801-2528000  
mytileDiff25p200.hyper\_CpG.Chr04.3352001-3352200  
mytileDiff25p200.hyper\_CpG.Chr04.3544001-3544200  
mytileDiff25p200.hyper\_CpG.Chr04.4635601-4635800  
mytileDiff25p200.hyper\_CpG.Chr04.5105401-5105600  
mytileDiff25p200.hyper\_CpG.Chr04.6352201-6352400  
mytileDiff25p200.hyper\_merged\_CHG.Chr04.7788801-7789000  
mytileDiff25p200.hyper\_CpG.Chr04.8222201-8222400  
mytileDiff25p200.hyper\_CpG.Chr04.8222201-8222400  
mytileDiff25p200.hyper\_CpG.Chr04.8368401-8368600

mytileDiff25p200.hyper\_CpG.Chr04.8407801-8408000  
mytileDiff25p200.hyper\_merged\_CHG.Chr04.18086601-18086800  
mytileDiff25p200.hyper\_CpG.Chr04.18898601-18898800  
mytileDiff25p200.hyper\_merged\_CHG.Chr04.19659401-19659600  
mytileDiff25p200.hyper\_CpG.Chr04.19941201-19941400  
mytileDiff25p200.hyper\_merged\_CHG.Chr04.21394601-21394800  
mytileDiff25p200.hyper\_merged\_CHH.Chr04.26353201-26353400  
mytileDiff25p200.hyper\_merged\_CHG.Chr04.36086801-36087000  
mytileDiff25p200.hyper\_merged\_CHG.Chr04.40387401-40387600  
mytileDiff25p200.hyper\_merged\_CHH.Chr04.40387401-40387600  
mytileDiff25p200.hyper\_merged\_CHH.Chr04.44913401-44913600  
mytileDiff25p200.hyper\_CpG.Chr04.46434601-46434800  
mytileDiff25p200.hyper\_CpG.Chr04.47433001-47433200  
mytileDiff25p200.hyper\_CpG.Chr04.47992801-47993000  
mytileDiff25p200.hyper\_merged\_CHG.Chr04.48280001-48280200  
mytileDiff25p200.hyper\_CpG.Chr04.49255001-49255200  
mytileDiff25p200.hyper\_CpG.Chr04.49252601-49252800  
mytileDiff25p200.hyper\_CpG.Chr04.50052201-50052400  
mytileDiff25p200.hyper\_merged\_CHH.Chr04.50068001-50068200  
mytileDiff25p200.hyper\_CpG.Chr04.50552201-50552400  
mytileDiff25p200.hyper\_CpG.Chr04.50570801-50571000  
mytileDiff25p200.hyper\_CpG.Chr04.52010201-52010400  
mytileDiff25p200.hyper\_merged\_CHG.Chr04.52278001-52278200  
mytileDiff25p200.hyper\_CpG.Chr04.52320401-52320600  
mytileDiff25p200.hyper\_CpG.Chr05.528401-528600  
mytileDiff25p200.hyper\_merged\_CHH.Chr05.827601-827800  
mytileDiff25p200.hyper\_CpG.Chr05.2534401-2534600  
mytileDiff25p200.hyper\_merged\_CHH.Chr05.3956401-3956600  
mytileDiff25p200.hyper\_CpG.Chr05.4141201-4141400  
mytileDiff25p200.hyper\_merged\_CHG.Chr05.5390401-5390600  
mytileDiff25p200.hyper\_CpG.Chr05.5618001-5618200  
mytileDiff25p200.hyper\_CpG.Chr05.5876201-5876400  
mytileDiff25p200.hyper\_merged\_CHG.Chr05.6802401-6802600  
mytileDiff25p200.hyper\_CpG.Chr05.8216001-8216200  
mytileDiff25p200.hyper\_CpG.Chr05.14964601-14964800  
mytileDiff25p200.hyper\_CpG.Chr05.14964801-14965000  
mytileDiff25p200.hyper\_merged\_CHG.Chr05.14964801-14965000  
mytileDiff25p200.hyper\_merged\_CHG.Chr05.25131801-25132000  
mytileDiff25p200.hyper\_CpG.Chr05.27877801-27878000  
mytileDiff25p200.hyper\_CpG.Chr05.29552401-29552600  
mytileDiff25p200.hyper\_CpG.Chr05.30981801-30982000  
mytileDiff25p200.hyper\_CpG.Chr05.32464201-32464400  
mytileDiff25p200.hyper\_CpG.Chr05.38175201-38175400  
mytileDiff25p200.hyper\_merged\_CHG.Chr05.39147401-39147600  
mytileDiff25p200.hyper\_CpG.Chr05.39612201-39612400  
mytileDiff25p200.hyper\_CpG.Chr05.39861801-39862000



mytileDiff25p200.hyper\_CpG.Chr05.40260401-40260600  
mytileDiff25p200.hyper\_CpG.Chr05.40258201-40258400  
mytileDiff25p200.hyper\_CpG.Chr06.157801-158000  
mytileDiff25p200.hyper\_merged\_CHG.Chr06.853601-853800  
mytileDiff25p200.hyper\_merged\_CHH.Chr06.1538601-1538800  
mytileDiff25p200.hyper\_CpG.Chr06.3492401-3492600  
mytileDiff25p200.hyper\_CpG.Chr06.3492401-3492600  
mytileDiff25p200.hyper\_merged\_CHH.Chr06.4642801-4643000  
mytileDiff25p200.hyper\_merged\_CHH.Chr06.4644001-4644200  
mytileDiff25p200.hyper\_CpG.Chr06.5545601-5545800  
mytileDiff25p200.hyper\_merged\_CHG.Chr06.7484001-7484200  
mytileDiff25p200.hyper\_merged\_CHG.Chr06.7598001-7598200  
mytileDiff25p200.hyper\_merged\_CHH.Chr06.7657801-7658000  
mytileDiff25p200.hyper\_CpG.Chr06.7771801-7772000  
mytileDiff25p200.hyper\_CpG.Chr06.7877201-7877400  
mytileDiff25p200.hyper\_CpG.Chr06.11439601-11439800  
mytileDiff25p200.hyper\_CpG.Chr06.11523001-11523200  
mytileDiff25p200.hyper\_merged\_CHH.Chr06.14400801-14401000  
mytileDiff25p200.hyper\_CpG.Chr06.14731001-14731200  
mytileDiff25p200.hyper\_CpG.Chr06.16960001-16960200  
mytileDiff25p200.hyper\_merged\_CHH.Chr06.17519401-17519600  
mytileDiff25p200.hyper\_CpG.Chr06.21877801-21878000  
mytileDiff25p200.hyper\_CpG.Chr06.22720201-22720400  
mytileDiff25p200.hyper\_merged\_CHG.Chr06.22881601-22881800  
mytileDiff25p200.hyper\_merged\_CHG.Chr06.23184601-23184800  
mytileDiff25p200.hyper\_merged\_CHG.Chr06.28882401-28882600  
mytileDiff25p200.hyper\_merged\_CHH.Chr06.29811601-29811800  
mytileDiff25p200.hyper\_merged\_CHG.Chr06.30993201-30993400  
mytileDiff25p200.hyper\_merged\_CHG.Chr06.37302001-37302200  
mytileDiff25p200.hyper\_merged\_CHG.Chr06.39223001-39223200  
mytileDiff25p200.hyper\_CpG.Chr06.44233601-44233800  
mytileDiff25p200.hyper\_merged\_CHG.Chr06.44233601-44233800  
mytileDiff25p200.hyper\_CpG.Chr06.44985001-44985200  
mytileDiff25p200.hyper\_merged\_CHH.Chr06.45214601-45214800  
mytileDiff25p200.hyper\_CpG.Chr06.47529001-47529200  
mytileDiff25p200.hyper\_CpG.Chr06.48103001-48103200  
mytileDiff25p200.hyper\_merged\_CHH.Chr06.49391601-49391800  
mytileDiff25p200.hyper\_CpG.Chr06.49405201-49405400  
mytileDiff25p200.hyper\_merged\_CHH.Chr06.50869201-50869400  
mytileDiff25p200.hyper\_CpG.Chr06.51002601-51002800  
mytileDiff25p200.hyper\_CpG.Chr06.51095201-51095400  
mytileDiff25p200.hyper\_CpG.Chr06.51273201-51273400  
mytileDiff25p200.hyper\_CpG.Chr07.297201-297400  
mytileDiff25p200.hyper\_CpG.Chr07.1076001-1076200  
mytileDiff25p200.hyper\_CpG.Chr07.1110001-1110200  
mytileDiff25p200.hyper\_merged\_CHG.Chr07.1115801-1116000

mytileDiff25p200.hyper\_CpG.Chr07.2055801-2056000  
mytileDiff25p200.hyper\_merged\_CHH.Chr07.2389001-2389200  
mytileDiff25p200.hyper\_CpG.Chr07.3943001-3943200  
mytileDiff25p200.hyper\_merged\_CHH.Chr07.4401201-4401400  
mytileDiff25p200.hyper\_merged\_CHH.Chr07.5072401-5072600  
mytileDiff25p200.hyper\_merged\_CHG.Chr07.5330201-5330400  
mytileDiff25p200.hyper\_CpG.Chr07.5336401-5336600  
mytileDiff25p200.hyper\_CpG.Chr07.9230601-9230800  
mytileDiff25p200.hyper\_merged\_CHG.Chr07.9341401-9341600  
mytileDiff25p200.hyper\_merged\_CHG.Chr07.9341401-9341600  
mytileDiff25p200.hyper\_CpG.Chr07.10120001-10120200  
mytileDiff25p200.hyper\_CpG.Chr07.11981601-11981800  
mytileDiff25p200.hyper\_CpG.Chr07.14289001-14289200  
mytileDiff25p200.hyper\_CpG.Chr07.16288601-16288800  
mytileDiff25p200.hyper\_CpG.Chr07.18135001-18135200  
mytileDiff25p200.hyper\_merged\_CHH.Chr07.18423201-18423400  
mytileDiff25p200.hyper\_CpG.Chr07.19436201-19436400  
mytileDiff25p200.hyper\_merged\_CHG.Chr07.19429401-19429600  
mytileDiff25p200.hyper\_CpG.Chr07.29709401-29709600  
mytileDiff25p200.hyper\_CpG.Chr07.30031401-30031600  
mytileDiff25p200.hyper\_merged\_CHG.Chr07.34966401-34966600  
mytileDiff25p200.hyper\_CpG.Chr07.35617201-35617400  
mytileDiff25p200.hyper\_merged\_CHH.Chr07.36876001-36876200  
mytileDiff25p200.hyper\_merged\_CHG.Chr07.36936201-36936400  
mytileDiff25p200.hyper\_CpG.Chr07.42482401-42482600  
mytileDiff25p200.hyper\_CpG.Chr07.43252801-43253000  
mytileDiff25p200.hyper\_CpG.Chr07.43511201-43511400  
mytileDiff25p200.hyper\_CpG.Chr08.1770401-1770600  
mytileDiff25p200.hyper\_CpG.Chr08.2676401-2676600  
mytileDiff25p200.hyper\_merged\_CHH.Chr08.4184001-4184200  
mytileDiff25p200.hyper\_merged\_CHG.Chr08.4183401-4183600  
mytileDiff25p200.hyper\_merged\_CHG.Chr08.4686001-4686200  
mytileDiff25p200.hyper\_merged\_CHG.Chr08.5477201-5477400  
mytileDiff25p200.hyper\_merged\_CHH.Chr08.5477201-5477400  
mytileDiff25p200.hyper\_CpG.Chr08.5916801-5917000  
mytileDiff25p200.hyper\_merged\_CHH.Chr08.6171001-6171200  
mytileDiff25p200.hyper\_CpG.Chr08.6260601-6260800  
mytileDiff25p200.hyper\_CpG.Chr08.6363201-6363400  
mytileDiff25p200.hyper\_CpG.Chr08.7388601-7388800  
mytileDiff25p200.hyper\_CpG.Chr08.8392601-8392800  
mytileDiff25p200.hyper\_CpG.Chr08.8764201-8764400  
mytileDiff25p200.hyper\_CpG.Chr08.9721201-9721400  
mytileDiff25p200.hyper\_CpG.Chr08.10321801-10322000  
mytileDiff25p200.hyper\_CpG.Chr08.10631001-10631200  
mytileDiff25p200.hyper\_CpG.Chr08.12661401-12661600  
mytileDiff25p200.hyper\_CpG.Chr08.14179201-14179400

mytileDiff25p200.hyper\_CpG.Chr08.15610201-15610400  
mytileDiff25p200.hyper\_CpG.Chr08.15610201-15610400  
mytileDiff25p200.hyper\_merged\_CHG.Chr08.15788601-15788800  
mytileDiff25p200.hyper\_merged\_CHH.Chr08.16957201-16957400  
mytileDiff25p200.hyper\_CpG.Chr08.21671801-21672000  
mytileDiff25p200.hyper\_CpG.Chr08.22200601-22200800  
mytileDiff25p200.hyper\_merged\_CHG.Chr08.22362201-22362400  
mytileDiff25p200.hyper\_CpG.Chr08.28326601-28326800  
mytileDiff25p200.hyper\_merged\_CHH.Chr08.35694401-35694600  
mytileDiff25p200.hyper\_merged\_CHG.Chr08.37164801-37165000  
mytileDiff25p200.hyper\_CpG.Chr08.37747801-37748000  
mytileDiff25p200.hyper\_CpG.Chr08.39406601-39406800  
mytileDiff25p200.hyper\_merged\_CHH.Chr08.43422601-43422800  
mytileDiff25p200.hyper\_CpG.Chr08.44140201-44140400  
mytileDiff25p200.hyper\_merged\_CHG.Chr08.45425401-45425600  
mytileDiff25p200.hyper\_merged\_CHH.Chr08.46014801-46015000  
mytileDiff25p200.hyper\_CpG.Chr08.46885001-46885200  
mytileDiff25p200.hyper\_CpG.Chr09.1008001-1008200  
mytileDiff25p200.hyper\_CpG.Chr09.1677601-1677800  
mytileDiff25p200.hyper\_CpG.Chr09.1881801-1882000  
mytileDiff25p200.hyper\_CpG.Chr09.1989601-1989800  
mytileDiff25p200.hyper\_CpG.Chr09.2001801-2002000  
mytileDiff25p200.hyper\_CpG.Chr09.2348601-2348800  
mytileDiff25p200.hyper\_CpG.Chr09.6079201-6079400  
mytileDiff25p200.hyper\_CpG.Chr09.9570201-9570400  
mytileDiff25p200.hyper\_merged\_CHG.Chr09.10172201-10172400  
mytileDiff25p200.hyper\_CpG.Chr09.10778601-10778800  
mytileDiff25p200.hyper\_merged\_CHG.Chr09.19464401-19464600  
mytileDiff25p200.hyper\_merged\_CHG.Chr09.19711001-19711200  
mytileDiff25p200.hyper\_merged\_CHG.Chr09.20342801-20343000  
mytileDiff25p200.hyper\_merged\_CHG.Chr09.20556001-20556200  
mytileDiff25p200.hyper\_merged\_CHH.Chr09.25018801-25019000  
mytileDiff25p200.hyper\_merged\_CHH.Chr09.25017201-25017400  
mytileDiff25p200.hyper\_CpG.Chr09.32770601-32770800  
mytileDiff25p200.hyper\_merged\_CHG.Chr09.32770601-32770800  
mytileDiff25p200.hyper\_CpG.Chr09.37712401-37712600  
mytileDiff25p200.hyper\_CpG.Chr09.37834401-37834600  
mytileDiff25p200.hyper\_merged\_CHH.Chr09.38048001-38048200  
mytileDiff25p200.hyper\_CpG.Chr09.40216001-40216200  
mytileDiff25p200.hyper\_CpG.Chr09.40785601-40785800  
mytileDiff25p200.hyper\_CpG.Chr09.41268001-41268200  
mytileDiff25p200.hyper\_CpG.Chr09.41284801-41285000  
mytileDiff25p200.hyper\_CpG.Chr09.41874001-41874200  
mytileDiff25p200.hyper\_merged\_CHH.Chr09.42224801-42225000  
mytileDiff25p200.hyper\_merged\_CHH.Chr09.42224801-42225000  
mytileDiff25p200.hyper\_merged\_CHH.Chr09.43413401-43413600

mytileDiff25p200.hyper\_CpG.Chr09.44081201-44081400  
mytileDiff25p200.hyper\_merged\_CHH.Chr09.46321401-46321600  
mytileDiff25p200.hyper\_CpG.Chr09.46916201-46916400  
mytileDiff25p200.hyper\_CpG.Chr09.47007401-47007600  
mytileDiff25p200.hyper\_CpG.Chr09.47339401-47339600  
mytileDiff25p200.hyper\_CpG.Chr09.48526201-48526400  
mytileDiff25p200.hyper\_CpG.Chr09.49813601-49813800  
mytileDiff25p200.hyper\_CpG.Chr09.50185601-50185800  
mytileDiff25p200.hyper\_CpG.Chr10.2435801-2436000  
mytileDiff25p200.hyper\_CpG.Chr10.2544001-2544200  
mytileDiff25p200.hyper\_merged\_CHH.Chr10.3980401-3980600  
mytileDiff25p200.hyper\_merged\_CHH.Chr10.3980401-3980600  
mytileDiff25p200.hyper\_merged\_CHG.Chr10.4861801-4862000  
mytileDiff25p200.hyper\_CpG.Chr10.5403001-5403200  
mytileDiff25p200.hyper\_CpG.Chr10.6623601-6623800  
mytileDiff25p200.hyper\_CpG.Chr10.22650201-22650400  
mytileDiff25p200.hyper\_merged\_CHG.Chr10.23109801-23110000  
mytileDiff25p200.hyper\_CpG.Chr10.24145201-24145400  
mytileDiff25p200.hyper\_CpG.Chr10.27235401-27235600  
mytileDiff25p200.hyper\_CpG.Chr10.27235401-27235600  
mytileDiff25p200.hyper\_merged\_CHG.Chr10.28927601-28927800  
mytileDiff25p200.hyper\_CpG.Chr10.29479001-29479200  
mytileDiff25p200.hyper\_merged\_CHG.Chr10.29664001-29664200  
mytileDiff25p200.hyper\_merged\_CHG.Chr10.32505601-32505800  
mytileDiff25p200.hyper\_CpG.Chr10.35730601-35730800  
mytileDiff25p200.hyper\_CpG.Chr10.37744801-37745000  
mytileDiff25p200.hyper\_CpG.Chr10.38530001-38530200  
mytileDiff25p200.hyper\_CpG.Chr10.38986401-38986600  
mytileDiff25p200.hyper\_CpG.Chr10.39021801-39022000  
mytileDiff25p200.hyper\_CpG.Chr10.39487801-39488000  
mytileDiff25p200.hyper\_merged\_CHG.Chr10.40056801-40057000  
mytileDiff25p200.hyper\_merged\_CHG.Chr10.40597801-40598000  
mytileDiff25p200.hyper\_merged\_CHH.Chr10.40783601-40783800  
mytileDiff25p200.hyper\_CpG.Chr10.41407001-41407200  
mytileDiff25p200.hyper\_CpG.Chr10.41492001-41492200  
mytileDiff25p200.hyper\_CpG.Chr10.41541001-41541200  
mytileDiff25p200.hyper\_merged\_CHH.Chr10.41859001-41859200  
mytileDiff25p200.hyper\_merged\_CHG.Chr10.42191801-42192000  
mytileDiff25p200.hyper\_CpG.Chr10.43703601-43703800  
mytileDiff25p200.hyper\_CpG.Chr10.44638001-44638200  
mytileDiff25p200.hyper\_CpG.Chr10.45398201-45398400  
mytileDiff25p200.hyper\_CpG.Chr10.47851001-47851200  
mytileDiff25p200.hyper\_CpG.Chr10.47900001-47900200  
mytileDiff25p200.hyper\_CpG.Chr10.49007201-49007400  
mytileDiff25p200.hyper\_CpG.Chr10.49007401-49007600  
mytileDiff25p200.hyper\_CpG.Chr10.49007201-49007400

mytileDiff25p200.hyper\_CpG.Chr10.49007401-49007600  
mytileDiff25p200.hyper\_CpG.Chr10.49304201-49304400  
mytileDiff25p200.hyper\_CpG.Chr10.49746201-49746400  
mytileDiff25p200.hyper\_CpG.Chr11.509001-509200  
mytileDiff25p200.hyper\_merged\_CHH.Chr11.523401-523600  
mytileDiff25p200.hyper\_CpG.Chr11.952201-952400  
mytileDiff25p200.hyper\_CpG.Chr11.1749801-1750000  
mytileDiff25p200.hyper\_CpG.Chr11.1938601-1938800  
mytileDiff25p200.hyper\_CpG.Chr11.2751401-2751600  
mytileDiff25p200.hyper\_merged\_CHH.Chr11.3373601-3373800  
mytileDiff25p200.hyper\_CpG.Chr11.3456001-3456200  
mytileDiff25p200.hyper\_CpG.Chr11.3569601-3569800  
mytileDiff25p200.hyper\_CpG.Chr11.4513401-4513600  
mytileDiff25p200.hyper\_merged\_CHG.Chr11.5025601-5025800  
mytileDiff25p200.hyper\_CpG.Chr11.5663201-5663400  
mytileDiff25p200.hyper\_CpG.Chr11.5757601-5757800  
mytileDiff25p200.hyper\_CpG.Chr11.6095601-6095800  
mytileDiff25p200.hyper\_merged\_CHG.Chr11.6984401-6984600  
mytileDiff25p200.hyper\_merged\_CHH.Chr11.7364801-7365000  
mytileDiff25p200.hyper\_CpG.Chr11.8839601-8839800  
mytileDiff25p200.hyper\_merged\_CHH.Chr11.9427601-9427800  
mytileDiff25p200.hyper\_CpG.Chr11.9500801-9501000  
mytileDiff25p200.hyper\_merged\_CHH.Chr11.9498601-9498800  
mytileDiff25p200.hyper\_CpG.Chr11.10057001-10057200  
mytileDiff25p200.hyper\_CpG.Chr11.10302201-10302400  
mytileDiff25p200.hyper\_merged\_CHH.Chr11.11475401-11475600  
mytileDiff25p200.hyper\_merged\_CHG.Chr11.14167801-14168000  
mytileDiff25p200.hyper\_CpG.Chr11.14678001-14678200  
mytileDiff25p200.hyper\_CpG.Chr11.15068001-15068200  
mytileDiff25p200.hyper\_merged\_CHG.Chr11.15953001-15953200  
mytileDiff25p200.hyper\_CpG.Chr11.18325401-18325600  
mytileDiff25p200.hyper\_merged\_CHG.Chr11.26302401-26302600  
mytileDiff25p200.hyper\_CpG.Chr11.30386001-30386200  
mytileDiff25p200.hyper\_CpG.Chr11.31279401-31279600  
mytileDiff25p200.hyper\_merged\_CHG.Chr11.32578401-32578600  
mytileDiff25p200.hyper\_CpG.Chr11.32937601-32937800  
mytileDiff25p200.hyper\_CpG.Chr12.83801-84000  
mytileDiff25p200.hyper\_CpG.Chr12.117601-117800  
mytileDiff25p200.hyper\_CpG.Chr12.1632001-1632200  
mytileDiff25p200.hyper\_CpG.Chr12.1983401-1983600  
mytileDiff25p200.hyper\_CpG.Chr12.2108001-2108200  
mytileDiff25p200.hyper\_merged\_CHG.Chr12.3260201-3260400  
mytileDiff25p200.hyper\_CpG.Chr12.3723801-3724000  
mytileDiff25p200.hyper\_merged\_CHG.Chr12.3763801-3764000  
mytileDiff25p200.hyper\_CpG.Chr12.3793801-3794000  
mytileDiff25p200.hyper\_CpG.Chr12.3804401-3804600

mytileDiff25p200.hyper\_CpG.Chr12.5379801-5380000  
mytileDiff25p200.hyper\_CpG.Chr12.7992001-7992200  
mytileDiff25p200.hyper\_CpG.Chr12.8969401-8969600  
mytileDiff25p200.hyper\_CpG.Chr12.9805801-9806000  
mytileDiff25p200.hyper\_merged\_CHG.Chr12.17197201-17197400  
mytileDiff25p200.hyper\_merged\_CHG.Chr12.17197201-17197400  
mytileDiff25p200.hyper\_merged\_CHG.Chr12.17197201-17197400  
mytileDiff25p200.hyper\_merged\_CHG.Chr12.21392001-21392200  
mytileDiff25p200.hyper\_CpG.Chr12.21950201-21950400  
mytileDiff25p200.hyper\_CpG.Chr12.23010801-23011000  
mytileDiff25p200.hyper\_merged\_CHG.Chr12.24272401-24272600  
mytileDiff25p200.hyper\_merged\_CHG.Chr12.24272401-24272600  
mytileDiff25p200.hyper\_CpG.Chr12.26061601-26061800  
mytileDiff25p200.hyper\_merged\_CHH.Chr12.33209001-33209200  
mytileDiff25p200.hyper\_CpG.Chr12.34141201-34141400  
mytileDiff25p200.hyper\_CpG.Chr12.34913201-34913400  
mytileDiff25p200.hyper\_CpG.Chr12.35077801-35078000  
mytileDiff25p200.hyper\_merged\_CHG.Chr12.38302001-38302200  
mytileDiff25p200.hyper\_merged\_CHH.Chr12.39225601-39225800  
mytileDiff25p200.hyper\_merged\_CHG.Chr13.2828601-2828800  
mytileDiff25p200.hyper\_merged\_CHG.Chr13.4643401-4643600  
mytileDiff25p200.hyper\_merged\_CHG.Chr13.10065401-10065600  
mytileDiff25p200.hyper\_CpG.Chr13.12629201-12629400  
mytileDiff25p200.hyper\_merged\_CHG.Chr13.13931001-13931200  
mytileDiff25p200.hyper\_CpG.Chr13.14473601-14473800  
mytileDiff25p200.hyper\_CpG.Chr13.14772801-14773000  
mytileDiff25p200.hyper\_CpG.Chr13.15181001-15181200  
mytileDiff25p200.hyper\_merged\_CHH.Chr13.16507401-16507600  
mytileDiff25p200.hyper\_CpG.Chr13.17660201-17660400  
mytileDiff25p200.hyper\_CpG.Chr13.18650201-18650400  
mytileDiff25p200.hyper\_merged\_CHH.Chr13.20839601-20839800  
mytileDiff25p200.hyper\_CpG.Chr13.22169001-22169200  
mytileDiff25p200.hyper\_merged\_CHG.Chr13.22378801-22379000  
mytileDiff25p200.hyper\_CpG.Chr13.23357401-23357600  
mytileDiff25p200.hyper\_CpG.Chr13.23721201-23721400  
mytileDiff25p200.hyper\_CpG.Chr13.24013401-24013600  
mytileDiff25p200.hyper\_merged\_CHH.Chr13.25169801-25170000  
mytileDiff25p200.hyper\_CpG.Chr13.25169801-25170000  
mytileDiff25p200.hyper\_CpG.Chr13.25841001-25841200  
mytileDiff25p200.hyper\_CpG.Chr13.26278201-26278400  
mytileDiff25p200.hyper\_merged\_CHG.Chr13.26454201-26454400  
mytileDiff25p200.hyper\_CpG.Chr13.26961401-26961600  
mytileDiff25p200.hyper\_CpG.Chr13.27878801-27879000  
mytileDiff25p200.hyper\_merged\_CHG.Chr13.28176801-28177000  
mytileDiff25p200.hyper\_merged\_CHH.Chr13.29481601-29481800  
mytileDiff25p200.hyper\_CpG.Chr13.32085201-32085400

mytileDiff25p200.hyper\_CpG.Chr13.33424001-33424200  
mytileDiff25p200.hyper\_CpG.Chr13.33515001-33515200  
mytileDiff25p200.hyper\_merged\_CHG.Chr13.33515001-33515200  
mytileDiff25p200.hyper\_CpG.Chr13.34822201-34822400  
mytileDiff25p200.hyper\_CpG.Chr13.35820201-35820400  
mytileDiff25p200.hyper\_merged\_CHH.Chr13.38947001-38947200  
mytileDiff25p200.hyper\_CpG.Chr13.39609001-39609200  
mytileDiff25p200.hyper\_merged\_CHH.Chr13.41123601-41123800  
mytileDiff25p200.hyper\_merged\_CHH.Chr13.41434601-41434800  
mytileDiff25p200.hyper\_merged\_CHG.Chr13.41503001-41503200  
mytileDiff25p200.hyper\_CpG.Chr13.41503001-41503200  
mytileDiff25p200.hyper\_CpG.Chr13.42959601-42959800  
mytileDiff25p200.hyper\_CpG.Chr13.43290801-43291000  
mytileDiff25p200.hyper\_CpG.Chr13.43439801-43440000  
mytileDiff25p200.hyper\_CpG.Chr13.43543801-43544000  
mytileDiff25p200.hyper\_CpG.Chr13.43720001-43720200  
mytileDiff25p200.hyper\_CpG.Chr13.44095601-44095800  
mytileDiff25p200.hyper\_CpG.Chr13.44878201-44878400  
mytileDiff25p200.hyper\_CpG.Chr13.45200401-45200600  
mytileDiff25p200.hyper\_merged\_CHG.Chr13.45714201-45714400  
mytileDiff25p200.hyper\_CpG.Chr14.602801-603000  
mytileDiff25p200.hyper\_CpG.Chr14.923401-923600  
mytileDiff25p200.hyper\_merged\_CHH.Chr14.5290601-5290800  
mytileDiff25p200.hyper\_CpG.Chr14.5777401-5777600  
mytileDiff25p200.hyper\_CpG.Chr14.9235201-9235400  
mytileDiff25p200.hyper\_merged\_CHH.Chr14.12025001-12025200  
mytileDiff25p200.hyper\_merged\_CHG.Chr14.12934801-12935000  
mytileDiff25p200.hyper\_merged\_CHH.Chr14.17975801-17976000  
mytileDiff25p200.hyper\_CpG.Chr14.18591001-18591200  
mytileDiff25p200.hyper\_CpG.Chr14.20437801-20438000  
mytileDiff25p200.hyper\_merged\_CHG.Chr14.22060801-22061000  
mytileDiff25p200.hyper\_merged\_CHH.Chr14.22504801-22505000  
mytileDiff25p200.hyper\_CpG.Chr14.23912601-23912800  
mytileDiff25p200.hyper\_merged\_CHH.Chr14.27585201-27585400  
mytileDiff25p200.hyper\_CpG.Chr14.28667401-28667600  
mytileDiff25p200.hyper\_merged\_CHG.Chr14.29003001-29003200  
mytileDiff25p200.hyper\_CpG.Chr14.31016201-31016400  
mytileDiff25p200.hyper\_CpG.Chr14.32277801-32278000  
mytileDiff25p200.hyper\_merged\_CHH.Chr14.32298601-32298800  
mytileDiff25p200.hyper\_CpG.Chr14.32277801-32278000  
mytileDiff25p200.hyper\_merged\_CHG.Chr14.42962401-42962600  
mytileDiff25p200.hyper\_CpG.Chr14.44553401-44553600  
mytileDiff25p200.hyper\_CpG.Chr14.44553401-44553600  
mytileDiff25p200.hyper\_merged\_CHG.Chr14.46352601-46352800  
mytileDiff25p200.hyper\_merged\_CHG.Chr14.46480601-46480800  
mytileDiff25p200.hyper\_CpG.Chr14.47539401-47539600

mytileDiff25p200.hyper\_merged\_CHG.Chr15.99401-99600  
mytileDiff25p200.hyper\_merged\_CHH.Chr15.739801-740000  
mytileDiff25p200.hyper\_CpG.Chr15.1095201-1095400  
mytileDiff25p200.hyper\_merged\_CHH.Chr15.1199001-1199200  
mytileDiff25p200.hyper\_merged\_CHH.Chr15.1595201-1595400  
mytileDiff25p200.hyper\_merged\_CHH.Chr15.3692201-3692400  
mytileDiff25p200.hyper\_CpG.Chr15.3745001-3745200  
mytileDiff25p200.hyper\_CpG.Chr15.5204201-5204400  
mytileDiff25p200.hyper\_merged\_CHH.Chr15.5733001-5733200  
mytileDiff25p200.hyper\_CpG.Chr15.6502201-6502400  
mytileDiff25p200.hyper\_CpG.Chr15.6618001-6618200  
mytileDiff25p200.hyper\_CpG.Chr15.6985401-6985600  
mytileDiff25p200.hyper\_CpG.Chr15.7252601-7252800  
mytileDiff25p200.hyper\_CpG.Chr15.7353001-7353200  
mytileDiff25p200.hyper\_CpG.Chr15.7353001-7353200  
mytileDiff25p200.hyper\_CpG.Chr15.9089201-9089400  
mytileDiff25p200.hyper\_CpG.Chr15.10832401-10832600  
mytileDiff25p200.hyper\_CpG.Chr15.11482201-11482400  
mytileDiff25p200.hyper\_CpG.Chr15.11606401-11606600  
mytileDiff25p200.hyper\_merged\_CHH.Chr15.11705801-11706000  
mytileDiff25p200.hyper\_merged\_CHH.Chr15.11993201-11993400  
mytileDiff25p200.hyper\_CpG.Chr15.15661401-15661600  
mytileDiff25p200.hyper\_merged\_CHH.Chr15.15799001-15799200  
mytileDiff25p200.hyper\_CpG.Chr15.16809401-16809600  
mytileDiff25p200.hyper\_merged\_CHG.Chr15.16809401-16809600  
mytileDiff25p200.hyper\_merged\_CHG.Chr15.17338401-17338600  
mytileDiff25p200.hyper\_CpG.Chr15.22381601-22381800  
mytileDiff25p200.hyper\_merged\_CHG.Chr15.33600001-33600200  
mytileDiff25p200.hyper\_merged\_CHG.Chr15.34828601-34828800  
mytileDiff25p200.hyper\_CpG.Chr15.43163801-43164000  
mytileDiff25p200.hyper\_CpG.Chr15.44306001-44306200  
mytileDiff25p200.hyper\_merged\_CHG.Chr15.44464601-44464800  
mytileDiff25p200.hyper\_merged\_CHG.Chr15.47476201-47476400  
mytileDiff25p200.hyper\_CpG.Chr15.48477801-48478000  
mytileDiff25p200.hyper\_merged\_CHG.Chr15.51244401-51244600  
mytileDiff25p200.hyper\_CpG.Chr15.51346201-51346400  
mytileDiff25p200.hyper\_merged\_CHG.Chr15.51407201-51407400  
mytileDiff25p200.hyper\_merged\_CHG.Chr15.51621201-51621400  
mytileDiff25p200.hyper\_merged\_CHG.Chr15.51619201-51619400  
mytileDiff25p200.hyper\_CpG.Chr16.311201-311400  
mytileDiff25p200.hyper\_merged\_CHG.Chr16.337601-337800  
mytileDiff25p200.hyper\_merged\_CHH.Chr16.411601-411800  
mytileDiff25p200.hyper\_CpG.Chr16.1631601-1631800  
mytileDiff25p200.hyper\_CpG.Chr16.2122201-2122400  
mytileDiff25p200.hyper\_CpG.Chr16.2534001-2534200



mytileDiff25p200.hyper\_merged\_CHH.Chr16.3511201-3511400  
mytileDiff25p200.hyper\_CpG.Chr16.4060001-4060200  
mytileDiff25p200.hyper\_CpG.Chr16.6935201-6935400  
mytileDiff25p200.hyper\_CpG.Chr16.7079601-7079800  
mytileDiff25p200.hyper\_CpG.Chr16.7960801-7961000  
mytileDiff25p200.hyper\_CpG.Chr16.9200001-9200200  
mytileDiff25p200.hyper\_merged\_CHH.Chr16.9382401-9382600  
mytileDiff25p200.hyper\_merged\_CHH.Chr16.9382401-9382600  
mytileDiff25p200.hyper\_CpG.Chr16.14742201-14742400  
mytileDiff25p200.hyper\_merged\_CHG.Chr16.20403601-20403800  
mytileDiff25p200.hyper\_merged\_CHG.Chr16.20397601-20397800  
mytileDiff25p200.hyper\_merged\_CHG.Chr16.20403601-20403800  
mytileDiff25p200.hyper\_CpG.Chr16.28770401-28770600  
mytileDiff25p200.hyper\_CpG.Chr16.28795401-28795600  
mytileDiff25p200.hyper\_CpG.Chr16.30418601-30418800  
mytileDiff25p200.hyper\_merged\_CHH.Chr16.30418601-30418800  
mytileDiff25p200.hyper\_merged\_CHG.Chr16.31130801-31131000  
mytileDiff25p200.hyper\_CpG.Chr16.33571601-33571800  
mytileDiff25p200.hyper\_merged\_CHH.Chr16.33906601-33906800  
mytileDiff25p200.hyper\_merged\_CHH.Chr16.33923601-33923800  
mytileDiff25p200.hyper\_merged\_CHG.Chr16.34242401-34242600  
mytileDiff25p200.hyper\_merged\_CHG.Chr16.34606401-34606600  
mytileDiff25p200.hyper\_merged\_CHG.Chr16.34913801-34914000  
mytileDiff25p200.hyper\_merged\_CHG.Chr16.35494801-35495000  
mytileDiff25p200.hyper\_CpG.Chr16.35546201-35546400  
mytileDiff25p200.hyper\_CpG.Chr16.35701401-35701600  
mytileDiff25p200.hyper\_CpG.Chr16.36935801-36936000  
mytileDiff25p200.hyper\_CpG.Chr17.600601-600800  
mytileDiff25p200.hyper\_CpG.Chr17.913201-913400  
mytileDiff25p200.hyper\_CpG.Chr17.1125801-1126000  
mytileDiff25p200.hyper\_CpG.Chr17.1136801-1137000  
mytileDiff25p200.hyper\_merged\_CHH.Chr17.1518001-1518200  
mytileDiff25p200.hyper\_CpG.Chr17.1679401-1679600  
mytileDiff25p200.hyper\_merged\_CHH.Chr17.2263801-2264000  
mytileDiff25p200.hyper\_CpG.Chr17.2347801-2348000  
mytileDiff25p200.hyper\_CpG.Chr17.2470201-2470400  
mytileDiff25p200.hyper\_CpG.Chr17.3518001-3518200  
mytileDiff25p200.hyper\_CpG.Chr17.3957001-3957200  
mytileDiff25p200.hyper\_merged\_CHG.Chr17.5352401-5352600  
mytileDiff25p200.hyper\_merged\_CHH.Chr17.5352401-5352600  
mytileDiff25p200.hyper\_merged\_CHH.Chr17.6468001-6468200  
mytileDiff25p200.hyper\_merged\_CHG.Chr17.8178201-8178400  
mytileDiff25p200.hyper\_merged\_CHG.Chr17.8178601-8178800  
mytileDiff25p200.hyper\_CpG.Chr17.8455801-8456000  
mytileDiff25p200.hyper\_merged\_CHH.Chr17.8480801-8481000

mytileDiff25p200.hyper\_merged\_CHG.Chr17.9230201-9230400  
mytileDiff25p200.hyper\_CpG.Chr17.9574801-9575000  
mytileDiff25p200.hyper\_CpG.Chr17.9630401-9630600  
mytileDiff25p200.hyper\_CpG.Chr17.9740201-9740400  
mytileDiff25p200.hyper\_CpG.Chr17.9787601-9787800  
mytileDiff25p200.hyper\_merged\_CHG.Chr17.10873601-10873800  
mytileDiff25p200.hyper\_CpG.Chr17.11291401-11291600  
mytileDiff25p200.hyper\_merged\_CHG.Chr17.11478401-11478600  
mytileDiff25p200.hyper\_merged\_CHH.Chr17.11555401-11555600  
mytileDiff25p200.hyper\_merged\_CHH.Chr17.11604601-11604800  
mytileDiff25p200.hyper\_CpG.Chr17.11863401-11863600  
mytileDiff25p200.hyper\_CpG.Chr17.12063801-12064000  
mytileDiff25p200.hyper\_CpG.Chr17.13375401-13375600  
mytileDiff25p200.hyper\_merged\_CHH.Chr17.13954001-13954200  
mytileDiff25p200.hyper\_CpG.Chr17.14614401-14614600  
mytileDiff25p200.hyper\_CpG.Chr17.15231401-15231600  
mytileDiff25p200.hyper\_merged\_CHH.Chr17.16067801-16068000  
mytileDiff25p200.hyper\_merged\_CHG.Chr17.17678801-17679000  
mytileDiff25p200.hyper\_merged\_CHH.Chr17.24470001-24470200  
mytileDiff25p200.hyper\_merged\_CHG.Chr17.31391001-31391200  
mytileDiff25p200.hyper\_merged\_CHG.Chr17.33005801-33006000  
mytileDiff25p200.hyper\_CpG.Chr17.33293401-33293600  
mytileDiff25p200.hyper\_CpG.Chr17.37300601-37300800  
mytileDiff25p200.hyper\_CpG.Chr17.37392401-37392600  
mytileDiff25p200.hyper\_CpG.Chr17.40126401-40126600  
mytileDiff25p200.hyper\_merged\_CHG.Chr17.40267601-40267800  
mytileDiff25p200.hyper\_merged\_CHG.Chr17.40267601-40267800  
mytileDiff25p200.hyper\_CpG.Chr17.40488401-40488600  
mytileDiff25p200.hyper\_CpG.Chr18.203601-203800  
mytileDiff25p200.hyper\_CpG.Chr18.1199401-1199600  
mytileDiff25p200.hyper\_CpG.Chr18.1339801-1340000  
mytileDiff25p200.hyper\_CpG.Chr18.1581201-1581400  
mytileDiff25p200.hyper\_CpG.Chr18.3143201-3143400  
mytileDiff25p200.hyper\_CpG.Chr18.3327401-3327600  
mytileDiff25p200.hyper\_CpG.Chr18.3815401-3815600  
mytileDiff25p200.hyper\_CpG.Chr18.4157201-4157400  
mytileDiff25p200.hyper\_merged\_CHG.Chr18.4157001-4157200  
mytileDiff25p200.hyper\_CpG.Chr18.5763401-5763600  
mytileDiff25p200.hyper\_CpG.Chr18.6260001-6260200  
mytileDiff25p200.hyper\_merged\_CHH.Chr18.6439401-6439600  
mytileDiff25p200.hyper\_CpG.Chr18.8397801-8398000  
mytileDiff25p200.hyper\_CpG.Chr18.8397801-8398000  
mytileDiff25p200.hyper\_CpG.Chr18.8639801-8640000  
mytileDiff25p200.hyper\_CpG.Chr18.11960601-11960800  
mytileDiff25p200.hyper\_merged\_CHH.Chr18.13423401-13423600  
mytileDiff25p200.hyper\_merged\_CHH.Chr18.14012801-14013000

mytileDiff25p200.hyper\_merged\_CHG.Chr18.16527201-16527400  
mytileDiff25p200.hyper\_merged\_CHG.Chr18.18537401-18537600  
mytileDiff25p200.hyper\_CpG.Chr18.19865201-19865400  
mytileDiff25p200.hyper\_merged\_CHG.Chr18.20307001-20307200  
mytileDiff25p200.hyper\_merged\_CHG.Chr18.20307001-20307200  
mytileDiff25p200.hyper\_CpG.Chr18.31582401-31582600  
mytileDiff25p200.hyper\_CpG.Chr18.33165601-33165800  
mytileDiff25p200.hyper\_merged\_CHG.Chr18.37300601-37300800  
mytileDiff25p200.hyper\_CpG.Chr18.43616001-43616200  
mytileDiff25p200.hyper\_CpG.Chr18.43616001-43616200  
mytileDiff25p200.hyper\_CpG.Chr18.43689801-43690000  
mytileDiff25p200.hyper\_CpG.Chr18.44403001-44403200  
mytileDiff25p200.hyper\_merged\_CHG.Chr18.44403001-44403200  
mytileDiff25p200.hyper\_merged\_CHG.Chr18.47112401-47112600  
mytileDiff25p200.hyper\_CpG.Chr18.47410001-47410200  
mytileDiff25p200.hyper\_CpG.Chr18.50913801-50914000  
mytileDiff25p200.hyper\_merged\_CHG.Chr18.51059801-51060000  
mytileDiff25p200.hyper\_CpG.Chr18.51168801-51169000  
mytileDiff25p200.hyper\_CpG.Chr18.51708201-51708400  
mytileDiff25p200.hyper\_CpG.Chr18.52129601-52129800  
mytileDiff25p200.hyper\_CpG.Chr18.53856001-53856200  
mytileDiff25p200.hyper\_merged\_CHG.Chr18.55207201-55207400  
mytileDiff25p200.hyper\_CpG.Chr18.57572801-57573000  
mytileDiff25p200.hyper\_CpG.Chr19.2158001-2158200  
mytileDiff25p200.hyper\_CpG.Chr19.2406201-2406400  
mytileDiff25p200.hyper\_CpG.Chr19.3309201-3309400  
mytileDiff25p200.hyper\_CpG.Chr19.3606801-3607000  
mytileDiff25p200.hyper\_CpG.Chr19.4322001-4322200  
mytileDiff25p200.hyper\_CpG.Chr19.5542801-5543000  
mytileDiff25p200.hyper\_CpG.Chr19.5873001-5873200  
mytileDiff25p200.hyper\_CpG.Chr19.8730601-8730800  
mytileDiff25p200.hyper\_merged\_CHG.Chr19.15264801-15265000  
mytileDiff25p200.hyper\_merged\_CHG.Chr19.15264801-15265000  
mytileDiff25p200.hyper\_merged\_CHG.Chr19.17599201-17599400  
mytileDiff25p200.hyper\_CpG.Chr19.26564401-26564600  
mytileDiff25p200.hyper\_merged\_CHG.Chr19.29618801-29619000  
mytileDiff25p200.hyper\_merged\_CHG.Chr19.29615001-29615200  
mytileDiff25p200.hyper\_merged\_CHH.Chr19.32021801-32022000  
mytileDiff25p200.hyper\_CpG.Chr19.32428001-32428200  
mytileDiff25p200.hyper\_merged\_CHG.Chr19.34762001-34762200  
mytileDiff25p200.hyper\_CpG.Chr19.35140601-35140800  
mytileDiff25p200.hyper\_merged\_CHH.Chr19.36510601-36510800  
mytileDiff25p200.hyper\_merged\_CHG.Chr19.37813001-37813200  
mytileDiff25p200.hyper\_CpG.Chr19.38418201-38418400  
mytileDiff25p200.hyper\_merged\_CHH.Chr19.41253201-41253400  
mytileDiff25p200.hyper\_CpG.Chr19.43050601-43050800

mytileDiff25p200.hyper\_CpG.Chr19.43050601-43050800  
mytileDiff25p200.hyper\_CpG.Chr19.43089401-43089600  
mytileDiff25p200.hyper\_CpG.Chr19.43540401-43540600  
mytileDiff25p200.hyper\_CpG.Chr19.44246401-44246600  
mytileDiff25p200.hyper\_merged\_CHH.Chr19.44246401-44246600  
mytileDiff25p200.hyper\_CpG.Chr19.44532201-44532400  
mytileDiff25p200.hyper\_CpG.Chr19.44907001-44907200  
mytileDiff25p200.hyper\_CpG.Chr19.44921001-44921200  
mytileDiff25p200.hyper\_CpG.Chr19.46053801-46054000  
mytileDiff25p200.hyper\_merged\_CHG.Chr19.46795601-46795800  
mytileDiff25p200.hyper\_CpG.Chr19.46995601-46995800  
mytileDiff25p200.hyper\_CpG.Chr19.48033001-48033200  
mytileDiff25p200.hyper\_CpG.Chr19.48619801-48620000  
mytileDiff25p200.hyper\_CpG.Chr19.48791801-48792000  
mytileDiff25p200.hyper\_merged\_CHH.Chr19.49013201-49013400  
mytileDiff25p200.hyper\_CpG.Chr19.50052401-50052600  
mytileDiff25p200.hyper\_merged\_CHH.Chr19.50414601-50414800  
mytileDiff25p200.hyper\_merged\_CHG.Chr19.50420801-50421000  
mytileDiff25p200.hyper\_CpG.Chr20.528601-528800  
mytileDiff25p200.hyper\_CpG.Chr20.528201-528400  
mytileDiff25p200.hyper\_merged\_CHH.Chr20.3308801-3309000  
mytileDiff25p200.hyper\_CpG.Chr20.5352201-5352400  
mytileDiff25p200.hyper\_merged\_CHH.Chr20.9645801-9646000  
mytileDiff25p200.hyper\_merged\_CHG.Chr20.11813001-11813200  
mytileDiff25p200.hyper\_merged\_CHG.Chr20.11813001-11813200  
mytileDiff25p200.hyper\_merged\_CHG.Chr20.17706601-17706800  
mytileDiff25p200.hyper\_merged\_CHG.Chr20.17707601-17707800  
mytileDiff25p200.hyper\_merged\_CHG.Chr20.17707401-17707600  
mytileDiff25p200.hyper\_merged\_CHG.Chr20.17706801-17707000  
mytileDiff25p200.hyper\_merged\_CHG.Chr20.26333401-26333600  
mytileDiff25p200.hyper\_merged\_CHH.Chr20.26329001-26329200  
mytileDiff25p200.hyper\_CpG.Chr20.32767201-32767400  
mytileDiff25p200.hyper\_CpG.Chr20.33650601-33650800  
mytileDiff25p200.hyper\_CpG.Chr20.34562801-34563000  
mytileDiff25p200.hyper\_merged\_CHG.Chr20.34965401-34965600  
mytileDiff25p200.hyper\_CpG.Chr20.35329801-35330000  
mytileDiff25p200.hyper\_merged\_CHG.Chr20.36220601-36220800  
mytileDiff25p200.hyper\_CpG.Chr20.36421401-36421600  
mytileDiff25p200.hyper\_CpG.Chr20.36902801-36903000  
mytileDiff25p200.hyper\_merged\_CHG.Chr20.36902801-36903000  
mytileDiff25p200.hyper\_CpG.Chr20.37152801-37153000  
mytileDiff25p200.hyper\_CpG.Chr20.37190201-37190400  
mytileDiff25p200.hyper\_CpG.Chr20.37795201-37795400  
mytileDiff25p200.hyper\_CpG.Chr20.39961001-39961200  
mytileDiff25p200.hyper\_merged\_CHG.Chr20.40598801-40599000

mytileDiff25p200.hyper\_merged\_CHG.Chr20.40598801-40599000  
mytileDiff25p200.hyper\_CpG.Chr20.40840801-40841000  
mytileDiff25p200.hyper\_merged\_CHG.Chr20.41772801-41773000  
mytileDiff25p200.hyper\_CpG.Chr20.43088001-43088200  
mytileDiff25p200.hyper\_merged\_CHG.Chr20.44441801-44442000  
mytileDiff25p200.hyper\_CpG.Chr20.47062801-47063000  
mytileDiff25p200.hyper\_CpG.Chr20.47320801-47321000  
mytileDiff25p200.hyper\_merged\_CHG.Chr20.47540201-47540400  
mytileDiff25p200.hyper\_merged\_CHG.scaffold\_197.12001-12200  
mytileDiff25p200.hyper\_merged\_CHH.scaffold\_21.424201-424400  
mytileDiff25p200.hyper\_merged\_CHH.scaffold\_27.230401-230600  
mytileDiff25p200.hyper\_merged\_CHG.scaffold\_28.78801-79000  
mytileDiff25p200.hyper\_merged\_CHG.scaffold\_361.7201-7400

---

**in all sequence contexts.**

| <b>REGION</b>                   | <b>GENE ID</b>  |
|---------------------------------|-----------------|
| GENE BODY                       | Glyma.01G004100 |
| PROMOTER                        | Glyma.01G027100 |
| GENE BODY                       | Glyma.01G028700 |
| PROMOTER                        | Glyma.01G031200 |
| GENE BODY (122bp); 3'UTR (78bp) | Glyma.01G034300 |
| GENE BODY                       | Glyma.01G036200 |
| GENE BODY                       | Glyma.01G038000 |
| GENE BODY                       | Glyma.01G045800 |
| PROMOTER                        | Glyma.01G068900 |
| GENE BODY                       | Glyma.01G073400 |
| GENE BODY                       | Glyma.01G073400 |
| GENE BODY                       | Glyma.01G074700 |
| GENE BODY                       | Glyma.01G089100 |
| GENE BODY                       | Glyma.01G092400 |
| GENE BODY                       | Glyma.01G093200 |
| GENE BODY                       | Glyma.01G111000 |
| 3'UTR                           | Glyma.01G112200 |
| GENE BODY                       | Glyma.01G115300 |
| GENE BODY                       | Glyma.01G140200 |
| PROMOTER                        | Glyma.01G140300 |
| PROMOTER                        | Glyma.01G145400 |
| GENE BODY                       | Glyma.01G157600 |
| GENE BODY                       | Glyma.01G168900 |
| 3'UTR                           | Glyma.01G170000 |
| GENE BODY                       | Glyma.01G172800 |
| GENE BODY                       | Glyma.01G172800 |
| GENE BODY                       | Glyma.01G177700 |
| GENE BODY                       | Glyma.01G183500 |
| GENE BODY                       | Glyma.01G188700 |
| GENE BODY                       | Glyma.01G209300 |
| GENE BODY                       | Glyma.01G209800 |
| GENE BODY                       | Glyma.01G241300 |
| GENE BODY                       | Glyma.01G245100 |
| GENE BODY                       | Glyma.02G007900 |
| GENE BODY                       | Glyma.02G008000 |
| GENE BODY                       | Glyma.02G011800 |
| GENE BODY                       | Glyma.02G014200 |
| GENE BODY                       | Glyma.02G041800 |
| GENE BODY                       | Glyma.02G042400 |
| GENE BODY                       | Glyma.02G051700 |
| GENE BODY                       | Glyma.02G055100 |
| GENE BODY                       | Glyma.02G078600 |
| PROMOTER                        | Glyma.02G080100 |
| GENE BODY                       | Glyma.02G083300 |

|                                      |                 |
|--------------------------------------|-----------------|
| PROMOTER                             | Glyma.02G083400 |
| GENE BODY                            | Glyma.02G094200 |
| PROMOTER                             | Glyma.02G095000 |
| GENE BODY                            | Glyma.02G097200 |
| GENE BODY                            | Glyma.02G097900 |
| GENE BODY                            | Glyma.02G102600 |
| GENE BODY                            | Glyma.02G107500 |
| GENE BODY                            | Glyma.02G113300 |
| PROMOTER (139bp); 5'UTR (61bp)       | Glyma.02G119200 |
| PROMOTER                             | Glyma.02G119900 |
| PROMOTER                             | Glyma.02G122400 |
| PROMOTER                             | Glyma.02G127500 |
| GENE BODY                            | Glyma.02G129000 |
| PROMOTER                             | Glyma.02G129000 |
| GENE BODY                            | Glyma.02G129400 |
| GENE BODY                            | Glyma.02G130400 |
| PROMOTER                             | Glyma.02G131900 |
| GENE BODY                            | Glyma.02G136800 |
| GENE BODY                            | Glyma.02G137000 |
| PROMOTER (143bp); 5'UTR (43bp); GENI | Glyma.02G138700 |
| PROMOTER                             | Glyma.02G141500 |
| GENE BODY                            | Glyma.02G162300 |
| GENE BODY                            | Glyma.02G165800 |
| GENE BODY                            | Glyma.02G169200 |
| GENE BODY                            | Glyma.02G170100 |
| GENE BODY                            | Glyma.02G182200 |
| GENE BODY                            | Glyma.02G182400 |
| PROMOTER (70bp); 5'UTR (130bp)       | Glyma.02G186100 |
| GENE BODY                            | Glyma.02G188900 |
| PROMOTER                             | Glyma.02G190100 |
| GENE BODY                            | Glyma.02G190200 |
| PROMOTER                             | Glyma.02G203000 |
| GENE BODY                            | Glyma.02G211800 |
| PROMOTER                             | Glyma.02G215200 |
| PROMOTER                             | Glyma.02G215200 |
| GENE BODY                            | Glyma.02G223600 |
| GENE BODY                            | Glyma.02G232900 |
| GENE BODY                            | Glyma.02G245200 |
| PROMOTER(3bp) ; GENE BODY (197bp)    | Glyma.02G252400 |
| GENE BODY                            | Glyma.02G258100 |
| PROMOTER                             | Glyma.02G259000 |
| PROMOTER                             | Glyma.02G291300 |
| GENE BODY                            | Glyma.02G301500 |
| GENE BODY                            | Glyma.03G002700 |
| GENE BODY                            | Glyma.03G004900 |

|                                 |                 |
|---------------------------------|-----------------|
| GENE BODY                       | Glyma.03G008100 |
| GENE BODY                       | Glyma.03G013000 |
| GENE BODY                       | Glyma.03G013500 |
| GENE BODY                       | Glyma.03G014400 |
| GENE BODY                       | Glyma.03G014400 |
| GENE BODY                       | Glyma.03G021900 |
| PROMOTER                        | Glyma.03G023000 |
| GENE BODY                       | Glyma.03G052800 |
| GENE BODY                       | Glyma.03G054100 |
| GENE BODY                       | Glyma.03G059100 |
| GENE BODY                       | Glyma.03G061000 |
| 3'UTR                           | Glyma.03G064400 |
| PROMOTER                        | Glyma.03G101500 |
| GENE BODY                       | Glyma.03G102100 |
| GENE BODY                       | Glyma.03G103900 |
| PROMOTER                        | Glyma.03G123200 |
| GENE BODY                       | Glyma.03G132000 |
| GENE BODY                       | Glyma.03G133000 |
| 5'UTR                           | Glyma.03G133900 |
| GENE BODY                       | Glyma.03G140100 |
| PROMOTER (102bp); 5'UTR (98bp)  | Glyma.03G141100 |
| GENE BODY                       | Glyma.03G151200 |
| PROMOTER                        | Glyma.03G157900 |
| GENE BODY                       | Glyma.03G168700 |
| GENE BODY                       | Glyma.03G193300 |
| PROMOTER                        | Glyma.03G211400 |
| GENE BODY                       | Glyma.03G219500 |
| GENE BODY                       | Glyma.03G229400 |
| GENE BODY                       | Glyma.03G240400 |
| GENE BODY                       | Glyma.03G243400 |
| GENE BODY                       | Glyma.03G243700 |
| GENE BODY                       | Glyma.03G250400 |
| GENE BODY                       | Glyma.03G256300 |
| GENE BODY                       | Glyma.04G005800 |
| GENE BODY                       | Glyma.04G014400 |
| PROMOTER                        | Glyma.04G019200 |
| GENE BODY                       | Glyma.04G031600 |
| GENE BODY                       | Glyma.04G041900 |
| GENE BODY                       | Glyma.04G044200 |
| GENE BODY                       | Glyma.04G057200 |
| PROMOTER                        | Glyma.04G062100 |
| GENE BODY                       | Glyma.04G075900 |
| GENE BODY                       | Glyma.04G089400 |
| 5'UTR (104bp); GENE BODY (96bp) | Glyma.04G092900 |
| GENE BODY                       | Glyma.04G093000 |
| GENE BODY                       | Glyma.04G094100 |



|                                |                 |
|--------------------------------|-----------------|
| GENE BODY                      | Glyma.04G094400 |
| PROMOTER                       | Glyma.04G129400 |
| PROMOTER (187bp); 5'UTR (13bp) | Glyma.04G132900 |
| GENE BODY                      | Glyma.04G135000 |
| GENE BODY                      | Glyma.04G135300 |
| GENE BODY                      | Glyma.04G138200 |
| PROMOTER                       | Glyma.04G144400 |
| GENE BODY                      | Glyma.04G155100 |
| 3'UTR                          | Glyma.04G162800 |
| 3'UTR                          | Glyma.04G162800 |
| 5'UTR                          | Glyma.04G182700 |
| GENE BODY                      | Glyma.04G192600 |
| GENE BODY                      | Glyma.04G201400 |
| GENE BODY                      | Glyma.04G207200 |
| GENE BODY                      | Glyma.04G211000 |
| GENE BODY                      | Glyma.04G221900 |
| GENE BODY                      | Glyma.04G221900 |
| PROMOTER                       | Glyma.04G232100 |
| PROMOTER                       | Glyma.04G232300 |
| GENE BODY                      | Glyma.04G236900 |
| GENE BODY                      | Glyma.04G237100 |
| GENE BODY                      | Glyma.04G253400 |
| GENE BODY                      | Glyma.04G256700 |
| GENE BODY                      | Glyma.04G257000 |
| GENE BODY                      | Glyma.05G006000 |
| PROMOTER                       | Glyma.05G009300 |
| PROMOTER                       | Glyma.05G029500 |
| PROMOTER                       | Glyma.05G044200 |
| PROMOTER                       | Glyma.05G046400 |
| PROMOTER                       | Glyma.05G058200 |
| GENE BODY                      | Glyma.05G060200 |
| GENE BODY                      | Glyma.05G062300 |
| 3'UTR (138bp)                  | Glyma.05G067200 |
| GENE BODY                      | Glyma.05G073400 |
| GENE BODY                      | Glyma.05G084600 |
| GENE BODY                      | Glyma.05G084600 |
| GENE BODY                      | Glyma.05G084600 |
| 3'UTR                          | Glyma.05G096300 |
| GENE BODY                      | Glyma.05G105000 |
| GENE BODY                      | Glyma.05G111000 |
| GENE BODY                      | Glyma.05G117000 |
| GENE BODY                      | Glyma.05G131500 |
| GENE BODY                      | Glyma.05G197500 |
| GENE BODY                      | Glyma.05G209500 |
| GENE BODY                      | Glyma.05G215400 |
| GENE BODY                      | Glyma.05G219000 |

|                                 |                 |
|---------------------------------|-----------------|
| GENE BODY                       | Glyma.05G223100 |
| PROMOTER                        | Glyma.05G223100 |
| GENE BODY                       | Glyma.06G001600 |
| GENE BODY                       | Glyma.06G011200 |
| PROMOTER                        | Glyma.06G020300 |
| GENE BODY                       | Glyma.06G046000 |
| PROMOTER                        | Glyma.06G046100 |
| PROMOTER                        | Glyma.06G061600 |
| GENE BODY                       | Glyma.06G061700 |
| GENE BODY                       | Glyma.06G072200 |
| GENE BODY                       | Glyma.06G094900 |
| GENE BODY                       | Glyma.06G096100 |
| PROMOTER                        | Glyma.06G097000 |
| GENE BODY                       | Glyma.06G097900 |
| GENE BODY                       | Glyma.06G098900 |
| GENE BODY                       | Glyma.06G140200 |
| GENE BODY (147bp); 3'UTR (53bp) | Glyma.06G141300 |
| 5'UTR                           | Glyma.06G172000 |
| GENE BODY                       | Glyma.06G174400 |
| GENE BODY                       | Glyma.06G192000 |
| PROMOTER (97bp); 5'UTR (103bp)  | Glyma.06G195600 |
| GENE BODY                       | Glyma.06G214100 |
| GENE BODY                       | Glyma.06G216700 |
| GENE BODY                       | Glyma.06G217200 |
| GENE BODY                       | Glyma.06G217700 |
| GENE BODY (72bp); 3'UTR (128bp) | Glyma.06G222100 |
| GENE BODY                       | Glyma.06G223900 |
| GENE BODY                       | Glyma.06G225200 |
| PROMOTER                        | Glyma.06G233300 |
| GENE BODY                       | Glyma.06G239100 |
| GENE BODY                       | Glyma.06G258100 |
| GENE BODY                       | Glyma.06G258100 |
| GENE BODY                       | Glyma.06G262600 |
| PROMOTER                        | Glyma.06G264700 |
| GENE BODY                       | Glyma.06G286700 |
| GENE BODY                       | Glyma.06G292200 |
| GENE BODY                       | Glyma.06G304900 |
| GENE BODY                       | Glyma.06G305000 |
| PROMOTER                        | Glyma.06G320000 |
| GENE BODY                       | Glyma.06G321400 |
| GENE BODY                       | Glyma.06G322700 |
| GENE BODY                       | Glyma.06G324800 |
| GENE BODY                       | Glyma.07G004000 |
| GENE BODY                       | Glyma.07G013800 |
| GENE BODY                       | Glyma.07G014200 |
| GENE BODY (47bp); 3'UTR (153bp) | Glyma.07G014300 |

|                                    |                 |
|------------------------------------|-----------------|
| GENE BODY                          | Glyma.07G026300 |
| GENE BODY                          | Glyma.07G030000 |
| GENE BODY                          | Glyma.07G047100 |
| GENE BODY (107bp); 3'UTR (93bp)    | Glyma.07G051000 |
| PROMOTER                           | Glyma.07G057000 |
| GENE BODY                          | Glyma.07G059800 |
| GENE BODY                          | Glyma.07G059900 |
| PROMOTER                           | Glyma.07G098200 |
| GENE BODY                          | Glyma.07G098900 |
| PROMOTER                           | Glyma.07G099000 |
| GENE BODY                          | Glyma.07G104700 |
| GENE BODY                          | Glyma.07G114400 |
| GENE BODY                          | Glyma.07G122000 |
| GENE BODY                          | Glyma.07G137300 |
| GENE BODY                          | Glyma.07G150700 |
| PROMOTER                           | Glyma.07G151800 |
| GENE BODY                          | Glyma.07G157400 |
| GENE BODY                          | Glyma.07G157400 |
| GENE BODY                          | Glyma.07G171600 |
| GENE BODY                          | Glyma.07G172400 |
| PROMOTER                           | Glyma.07G181500 |
| 5'UTR (101bp); GENE BODY (99bp)    | Glyma.07G188600 |
| PROMOTER                           | Glyma.07G200200 |
| GENE BODY                          | Glyma.07G201000 |
| GENE BODY                          | Glyma.07G245900 |
| GENE BODY                          | Glyma.07G256500 |
| GENE BODY                          | Glyma.07G259500 |
| 3'UTR                              | Glyma.08G022100 |
| GENE BODY                          | Glyma.08G033500 |
| PROMOTER                           | Glyma.08G054200 |
| PROMOTER (98bp); GENE BODY (102bp) | Glyma.08G054200 |
| GENE BODY                          | Glyma.08G060800 |
| GENE BODY                          | Glyma.08G071400 |
| GENE BODY                          | Glyma.08G071400 |
| GENE BODY                          | Glyma.08G077800 |
| PROMOTER                           | Glyma.08G081600 |
| GENE BODY                          | Glyma.08G082600 |
| GENE BODY                          | Glyma.08G084400 |
| GENE BODY                          | Glyma.08G096300 |
| GENE BODY                          | Glyma.08G109400 |
| GENE BODY                          | Glyma.08G114600 |
| GENE BODY                          | Glyma.08G126200 |
| GENE BODY                          | Glyma.08G134600 |
| GENE BODY                          | Glyma.08G138800 |
| GENE BODY                          | Glyma.08G162300 |
| GENE BODY                          | Glyma.08G176800 |

|                                 |                 |
|---------------------------------|-----------------|
| GENE BODY                       | Glyma.08G193600 |
| GENE BODY                       | Glyma.08G193700 |
| GENE BODY                       | Glyma.08G195900 |
| PROMOTER                        | Glyma.08G209300 |
| GENE BODY                       | Glyma.08G248800 |
| GENE BODY                       | Glyma.08G252600 |
| GENE BODY                       | Glyma.08G253800 |
| GENE BODY                       | Glyma.08G263100 |
| PROMOTER                        | Glyma.08G272500 |
| PROMOTER                        | Glyma.08G277400 |
| GENE BODY                       | Glyma.08G279300 |
| GENE BODY                       | Glyma.08G285000 |
| GENE BODY                       | Glyma.08G314100 |
| GENE BODY                       | Glyma.08G322700 |
| GENE BODY                       | Glyma.08G337400 |
| PROMOTER                        | Glyma.08G345200 |
| GENE BODY (155bp); 3'UTR (45bp) | Glyma.08G356300 |
| GENE BODY                       | Glyma.09G013400 |
| GENE BODY                       | Glyma.09G021200 |
| GENE BODY                       | Glyma.09G023300 |
| GENE BODY                       | Glyma.09G024700 |
| GENE BODY                       | Glyma.09G024800 |
| GENE BODY                       | Glyma.09G028600 |
| GENE BODY                       | Glyma.09G063400 |
| GENE BODY (158bp); 3'UTR (42bp) | Glyma.09G081800 |
| GENE BODY                       | Glyma.09G084300 |
| GENE BODY                       | Glyma.09G086600 |
| GENE BODY                       | Glyma.09G104600 |
| GENE BODY                       | Glyma.09G106000 |
| 3'UTR (109bp); GENE BODY (3bp)  | Glyma.09G107500 |
| GENE BODY                       | Glyma.09G108300 |
| GENE BODY                       | Glyma.09G115200 |
| GENE BODY                       | Glyma.09G115200 |
| GENE BODY                       | Glyma.09G131700 |
| GENE BODY                       | Glyma.09G131700 |
| GENE BODY                       | Glyma.09G154100 |
| GENE BODY                       | Glyma.09G155200 |
| GENE BODY                       | Glyma.09G157300 |
| GENE BODY                       | Glyma.09G177600 |
| GENE BODY                       | Glyma.09G182600 |
| GENE BODY                       | Glyma.09G188100 |
| GENE BODY                       | Glyma.09G188300 |
| GENE BODY                       | Glyma.09G194400 |
| PROMOTER (67 bp)                | Glyma.09G197500 |
| PROMOTER (19bp); 5'UTR (181bp)  | Glyma.09G197600 |
| GENE BODY                       | Glyma.09G209900 |

|                                 |                 |
|---------------------------------|-----------------|
| PROMOTER                        | Glyma.09G217700 |
| PROMOTER                        | Glyma.09G240900 |
| GENE BODY                       | Glyma.09G247600 |
| GENE BODY                       | Glyma.09G248800 |
| GENE BODY                       | Glyma.09G253700 |
| GENE BODY                       | Glyma.09G267400 |
| GENE BODY                       | Glyma.09G282500 |
| GENE BODY                       | Glyma.09G286500 |
| GENE BODY                       | Glyma.10G028000 |
| GENE BODY                       | Glyma.10G029000 |
| PROMOTER                        | Glyma.10G044400 |
| PROMOTER                        | Glyma.10G044600 |
| GENE BODY                       | Glyma.10G053600 |
| GENE BODY                       | Glyma.10G058500 |
| GENE BODY                       | Glyma.10G067400 |
| GENE BODY                       | Glyma.10G104300 |
| GENE BODY                       | Glyma.10G104900 |
| GENE BODY                       | Glyma.10G106500 |
| PROMOTER                        | Glyma.10G112600 |
| PROMOTER                        | Glyma.10G112700 |
| GENE BODY                       | Glyma.10G116500 |
| GENE BODY                       | Glyma.10G117200 |
| GENE BODY                       | Glyma.10G118100 |
| GENE BODY                       | Glyma.10G124700 |
| GENE BODY                       | Glyma.10G132600 |
| GENE BODY                       | Glyma.10G142800 |
| GENE BODY                       | Glyma.10G150000 |
| GENE BODY                       | Glyma.10G155100 |
| GENE BODY                       | Glyma.10G155800 |
| GENE BODY                       | Glyma.10G160500 |
| PROMOTER                        | Glyma.10G166200 |
| GENE BODY                       | Glyma.10G172400 |
| PROMOTER (140bp); 5'UTR (60bp)  | Glyma.10G174000 |
| PROMOTER                        | Glyma.10G180400 |
| GENE BODY                       | Glyma.10G181400 |
| GENE BODY                       | Glyma.10G182000 |
| GENE BODY                       | Glyma.10G185600 |
| GENE BODY                       | Glyma.10G188600 |
| GENE BODY                       | Glyma.10G205500 |
| GENE BODY                       | Glyma.10G214100 |
| GENE BODY                       | Glyma.10G222900 |
| GENE BODY                       | Glyma.10G250500 |
| GENE BODY                       | Glyma.10G250800 |
| 5'UTR                           | Glyma.10G266600 |
| GENE BODY (174bp); 3'UTR (26bp) | Glyma.10G266600 |
| 5'UTR (19bp); GENE BODY (181bp) | Glyma.10G266800 |

|                                    |                 |
|------------------------------------|-----------------|
| GENE BODY (68bp); 3'UTR (26 bp)    | Glyma.10G266800 |
| GENE BODY                          | Glyma.10G270800 |
| GENE BODY                          | Glyma.10G274500 |
| GENE BODY                          | Glyma.11G007200 |
| PROMOTER                           | Glyma.11G007500 |
| GENE BODY                          | Glyma.11G013900 |
| GENE BODY                          | Glyma.11G024700 |
| GENE BODY                          | Glyma.11G027000 |
| GENE BODY (44bp); 3'UTR (156bp)    | Glyma.11G038500 |
| PROMOTER                           | Glyma.11G045500 |
| GENE BODY                          | Glyma.11G046100 |
| GENE BODY                          | Glyma.11G047800 |
| GENE BODY                          | Glyma.11G059600 |
| GENE BODY                          | Glyma.11G067000 |
| GENE BODY                          | Glyma.11G075600 |
| GENE BODY                          | Glyma.11G077000 |
| GENE BODY                          | Glyma.11G081200 |
| GENE BODY                          | Glyma.11G092100 |
| PROMOTER                           | Glyma.11G096600 |
| PROMOTER (170bp); GENE BODY (30bp) | Glyma.11G115900 |
| GENE BODY                          | Glyma.11G124000 |
| GENE BODY                          | Glyma.11G125100 |
| PROMOTER                           | Glyma.11G125100 |
| GENE BODY                          | Glyma.11G131600 |
| GENE BODY                          | Glyma.11G135300 |
| PROMOTER                           | Glyma.11G148800 |
| GENE BODY                          | Glyma.11G158400 |
| PROMOTER (134bp); GENE BODY (66bp) | Glyma.11G160300 |
| PROMOTER                           | Glyma.11G162300 |
| GENE BODY                          | Glyma.11G166200 |
| GENE BODY                          | Glyma.11G170700 |
| PROMOTER                           | Glyma.11G190400 |
| GENE BODY                          | Glyma.11G211200 |
| GENE BODY                          | Glyma.11G218000 |
| GENE BODY                          | Glyma.11G230500 |
| 3'UTR                              | Glyma.11G234200 |
| GENE BODY                          | Glyma.12G001100 |
| GENE BODY                          | Glyma.12G001400 |
| 5'UTR (95bp); GENE BODY (105bp)    | Glyma.12G022400 |
| GENE BODY                          | Glyma.12G027400 |
| PROMOTER                           | Glyma.12G028200 |
| GENE BODY                          | Glyma.12G044800 |
| GENE BODY                          | Glyma.12G052000 |
| GENE BODY                          | Glyma.12G052400 |
| GENE BODY                          | Glyma.12G052700 |
| GENE BODY                          | Glyma.12G052800 |

|                                 |                 |
|---------------------------------|-----------------|
| GENE BODY                       | Glyma.12G072900 |
| GENE BODY                       | Glyma.12G095300 |
| GENE BODY                       | Glyma.12G101500 |
| GENE BODY                       | Glyma.12G107000 |
| GENE BODY                       | Glyma.12G139700 |
| GENE BODY                       | Glyma.12G139800 |
| GENE BODY                       | Glyma.12G139900 |
| GENE BODY                       | Glyma.12G149800 |
| GENE BODY                       | Glyma.12G151500 |
| PROMOTER                        | Glyma.12G152500 |
| PROMOTER                        | Glyma.12G154900 |
| PROMOTER                        | Glyma.12G155000 |
| GENE BODY                       | Glyma.12G157700 |
| GENE BODY                       | Glyma.12G174700 |
| GENE BODY                       | Glyma.12G180800 |
| GENE BODY                       | Glyma.12G188100 |
| GENE BODY                       | Glyma.12G189100 |
| GENE BODY                       | Glyma.12G223200 |
| GENE BODY                       | Glyma.12G233100 |
| PROMOTER                        | Glyma.13G010300 |
| GENE BODY                       | Glyma.13G024700 |
| GENE BODY                       | Glyma.13G030600 |
| GENE BODY                       | Glyma.13G040300 |
| GENE BODY                       | Glyma.13G045400 |
| GENE BODY                       | Glyma.13G048900 |
| GENE BODY                       | Glyma.13G051300 |
| GENE BODY (76bp); 3'UTR (124bp) | Glyma.13G054500 |
| GENE BODY                       | Glyma.13G065500 |
| GENE BODY                       | Glyma.13G073900 |
| GENE BODY                       | Glyma.13G080100 |
| GENE BODY                       | Glyma.13G093300 |
| GENE BODY                       | Glyma.13G107100 |
| PROMOTER                        | Glyma.13G110100 |
| GENE BODY                       | Glyma.13G120800 |
| GENE BODY                       | Glyma.13G124000 |
| GENE BODY (145bp); 3'UTR (55bp) | Glyma.13G127100 |
| PROMOTER (145bp); 5'UTR (55bp)  | Glyma.13G139100 |
| PROMOTER (145bp); 5'UTR (55bp)  | Glyma.13G139100 |
| GENE BODY (166bp); 3'UTR (34bp) | Glyma.13G145400 |
| GENE BODY                       | Glyma.13G149200 |
| GENE BODY (29bp); 3'UTR (84bp)  | Glyma.13G150800 |
| GENE BODY                       | Glyma.13G154200 |
| GENE BODY                       | Glyma.13G163500 |
| GENE BODY                       | Glyma.13G167000 |
| GENE BODY                       | Glyma.13G181600 |
| GENE BODY                       | Glyma.13G207200 |

|                                    |                 |
|------------------------------------|-----------------|
| GENE BODY                          | Glyma.13G221200 |
| PROMOTER                           | Glyma.13G222200 |
| PROMOTER                           | Glyma.13G222200 |
| GENE BODY                          | Glyma.13G238000 |
| 5'UTR (14bp); GENE BODY (186bp)    | Glyma.13G250900 |
| PROMOTER                           | Glyma.13G289100 |
| GENE BODY                          | Glyma.13G297200 |
| PROMOTER                           | Glyma.13G316600 |
| GENE BODY                          | Glyma.13G319900 |
| PROMOTER (167bp); 5'UTR (33bp)     | Glyma.13G320700 |
| PROMOTER (167bp); GENE BODY (33bp) | Glyma.13G320700 |
| GENE BODY                          | Glyma.13G336200 |
| GENE BODY                          | Glyma.13G341000 |
| GENE BODY                          | Glyma.13G342900 |
| GENE BODY (155bp); 3'UTR (45bp)    | Glyma.13G344400 |
| GENE BODY                          | Glyma.13G346900 |
| GENE BODY                          | Glyma.13G351800 |
| GENE BODY                          | Glyma.13G362000 |
| GENE BODY                          | Glyma.13G366100 |
| GENE BODY                          | Glyma.13G372100 |
| GENE BODY                          | Glyma.14G007700 |
| GENE BODY                          | Glyma.14G012200 |
| GENE BODY                          | Glyma.14G064500 |
| GENE BODY                          | Glyma.14G068900 |
| GENE BODY                          | Glyma.14G097800 |
| PROMOTER                           | Glyma.14G109000 |
| GENE BODY                          | Glyma.14G112200 |
| PROMOTER                           | Glyma.14G122600 |
| GENE BODY                          | Glyma.14G123700 |
| GENE BODY (44bp); 3'UTR (156bp)    | Glyma.14G127700 |
| GENE BODY                          | Glyma.14G129900 |
| PROMOTER                           | Glyma.14G131400 |
| 5'UTR (89bp); GENE BODY (111bp)    | Glyma.14G135900 |
| PROMOTER                           | Glyma.14G140600 |
| GENE BODY                          | Glyma.14G142300 |
| 3'UTR                              | Glyma.14G143000 |
| GENE BODY                          | Glyma.14G146200 |
| GENE BODY                          | Glyma.14G149700 |
| GENE BODY                          | Glyma.14G149700 |
| 3'UTR                              | Glyma.14G149800 |
| PROMOTER                           | Glyma.14G174100 |
| GENE BODY                          | Glyma.14G182400 |
| GENE BODY                          | Glyma.14G182500 |
| GENE BODY                          | Glyma.14G198500 |
| PROMOTER (63bp); 5'UTR (137bp)     | Glyma.14G199800 |
| GENE BODY (153bp); 3'UTR (47bp)    | Glyma.14G210200 |



|                                 |                 |
|---------------------------------|-----------------|
| GENE BODY                       | Glyma.15G000900 |
| 3'UTR                           | Glyma.15G009500 |
| GENE BODY                       | Glyma.15G013500 |
| PROMOTER                        | Glyma.15G015100 |
| PROMOTER                        | Glyma.15G020600 |
| PROMOTER                        | Glyma.15G046400 |
| GENE BODY                       | Glyma.15G047100 |
| GENE BODY                       | Glyma.15G068100 |
| PROMOTER                        | Glyma.15G074800 |
| GENE BODY (177bp); 3'UTR (23bp) | Glyma.15G084700 |
| GENE BODY                       | Glyma.15G086200 |
| GENE BODY                       | Glyma.15G091000 |
| GENE BODY                       | Glyma.15G093600 |
| GENE BODY (189bp); 3'UTR (11bp) | Glyma.15G094500 |
| 3'UTR                           | Glyma.15G094600 |
| GENE BODY                       | Glyma.15G115500 |
| GENE BODY                       | Glyma.15G134800 |
| GENE BODY (181bp); 5'UTR (19bp) | Glyma.15G140300 |
| PROMOTER                        | Glyma.15G142000 |
| PROMOTER                        | Glyma.15G142800 |
| GENE BODY                       | Glyma.15G145600 |
| GENE BODY                       | Glyma.15G171400 |
| GENE BODY                       | Glyma.15G172600 |
| GENE BODY                       | Glyma.15G177000 |
| GENE BODY                       | Glyma.15G177000 |
| GENE BODY                       | Glyma.15G179700 |
| GENE BODY                       | Glyma.15G195700 |
| GENE BODY                       | Glyma.15G213200 |
| PROMOTER                        | Glyma.15G214600 |
| GENE BODY                       | Glyma.15G230500 |
| GENE BODY                       | Glyma.15G235500 |
| GENE BODY                       | Glyma.15G236100 |
| GENE BODY                       | Glyma.15G249000 |
| GENE BODY                       | Glyma.15G255300 |
| PROMOTER                        | Glyma.15G274500 |
| GENE BODY                       | Glyma.15G275000 |
| GENE BODY                       | Glyma.15G275400 |
| GENE BODY                       | Glyma.15G276800 |
| GENE BODY                       | Glyma.15G276800 |
| GENE BODY                       | Glyma.16G004800 |
| PROMOTER                        | Glyma.16G005000 |
| GENE BODY                       | Glyma.16G005600 |
| GENE BODY                       | Glyma.16G018400 |
| GENE BODY                       | Glyma.16G022600 |
| GENE BODY                       | Glyma.16G026000 |

|                                 |                 |
|---------------------------------|-----------------|
| PROMOTER                        | Glyma.16G036900 |
| GENE BODY                       | Glyma.16G043300 |
| 5'UTR (145bp); GENE BODY (55bp) | Glyma.16G069400 |
| GENE BODY                       | Glyma.16G070900 |
| GENE BODY                       | Glyma.16G077500 |
| GENE BODY                       | Glyma.16G082400 |
| GENE BODY                       | Glyma.16G082900 |
| GENE BODY                       | Glyma.16G083000 |
| GENE BODY                       | Glyma.16G092500 |
| GENE BODY                       | Glyma.16G101500 |
| GENE BODY                       | Glyma.16G101500 |
| 5'UTR                           | Glyma.16G101700 |
| GENE BODY                       | Glyma.16G131900 |
| GENE BODY                       | Glyma.16G131900 |
| PROMOTER (7bp); 5'UTR (193 bp)  | Glyma.16G144000 |
| PROMOTER (7bp); 5'UTR (193bp)   | Glyma.16G144000 |
| GENE BODY                       | Glyma.16G150900 |
| GENE BODY                       | Glyma.16G174700 |
| PROMOTER                        | Glyma.16G178100 |
| PROMOTER                        | Glyma.16G178300 |
| PROMOTER                        | Glyma.16G181400 |
| GENE BODY                       | Glyma.16G184200 |
| GENE BODY                       | Glyma.16G186600 |
| GENE BODY                       | Glyma.16G192800 |
| GENE BODY                       | Glyma.16G193200 |
| 3'UTR                           | Glyma.16G195300 |
| GENE BODY                       | Glyma.16G210200 |
| GENE BODY                       | Glyma.17G006600 |
| GENE BODY                       | Glyma.17G011500 |
| GENE BODY                       | Glyma.17G015000 |
| GENE BODY                       | Glyma.17G015200 |
| PROMOTER                        | Glyma.17G020500 |
| GENE BODY (140bp); 3'UTR (60bp) | Glyma.17G022900 |
| PROMOTER                        | Glyma.17G030800 |
| GENE BODY                       | Glyma.17G031900 |
| GENE BODY (190bp); 3'UTR (10bp) | Glyma.17G033700 |
| GENE BODY                       | Glyma.17G046900 |
| GENE BODY                       | Glyma.17G052100 |
| GENE BODY                       | Glyma.17G068600 |
| GENE BODY                       | Glyma.17G068600 |
| 5'UTR                           | Glyma.17G083300 |
| GENE BODY                       | Glyma.17G104100 |
| GENE BODY                       | Glyma.17G104100 |
| GENE BODY                       | Glyma.17G107600 |
| PROMOTER                        | Glyma.17G108200 |

|                                    |                 |
|------------------------------------|-----------------|
| PROMOTER                           | Glyma.17G117100 |
| 5'UTR (6bp); GENE BODY (194bp)     | Glyma.17G120400 |
| GENE BODY                          | Glyma.17G120900 |
| GENE BODY                          | Glyma.17G121700 |
| GENE BODY                          | Glyma.17G122300 |
| GENE BODY (122bp); 3'UTR (78bp)    | Glyma.17G135200 |
| GENE BODY                          | Glyma.17G139100 |
| GENE BODY                          | Glyma.17G141300 |
| GENE BODY                          | Glyma.17G142200 |
| GENE BODY (109bp); 3'UTR (91bp)    | Glyma.17G142700 |
| GENE BODY                          | Glyma.17G145000 |
| GENE BODY                          | Glyma.17G146400 |
| GENE BODY                          | Glyma.17G157100 |
| GENE BODY                          | Glyma.17G160600 |
| GENE BODY                          | Glyma.17G163700 |
| 5'UTR (58bp); GENE BODY (142bp)    | Glyma.17G166700 |
| PROMOTER                           | Glyma.17G170600 |
| GENE BODY                          | Glyma.17G172700 |
| GENE BODY                          | Glyma.17G188300 |
| PROMOTER (87bp); GENE BODY (113bp) | Glyma.17G198200 |
| GENE BODY                          | Glyma.17G204200 |
| 3'UTR                              | Glyma.17G204900 |
| GENE BODY                          | Glyma.17G220800 |
| PROMOTER                           | Glyma.17G221300 |
| GENE BODY                          | Glyma.17G245800 |
| 5'UTR                              | Glyma.17G247000 |
| GENE BODY                          | Glyma.17G247100 |
| GENE BODY                          | Glyma.17G249900 |
| GENE BODY                          | Glyma.18G002400 |
| 5'UTR                              | Glyma.18G016800 |
| GENE BODY                          | Glyma.18G018300 |
| GENE BODY                          | Glyma.18G021500 |
| GENE BODY                          | Glyma.18G039000 |
| GENE BODY                          | Glyma.18G040400 |
| GENE BODY                          | Glyma.18G044200 |
| PROMOTER                           | Glyma.18G047900 |
| PROMOTER                           | Glyma.18G047900 |
| GENE BODY                          | Glyma.18G063000 |
| GENE BODY                          | Glyma.18G067400 |
| PROMOTER                           | Glyma.18G068900 |
| GENE BODY                          | Glyma.18G085100 |
| GENE BODY                          | Glyma.18G085200 |
| GENE BODY (52bp); 5'UTR (148bp)    | Glyma.18G087100 |
| GENE BODY                          | Glyma.18G106800 |
| PROMOTER                           | Glyma.18G112700 |
| PROMOTER (132bp); GENE BODY (68bp) | Glyma.18G115200 |

|                                   |                 |
|-----------------------------------|-----------------|
| GENE BODY                         | Glyma.18G126000 |
| GENE BODY                         | Glyma.18G132200 |
| GENE BODY                         | Glyma.18G136200 |
| GENE BODY                         | Glyma.18G137800 |
| PROMOTER                          | Glyma.18G137900 |
| GENE BODY                         | Glyma.18G154700 |
| GENE BODY                         | Glyma.18G155200 |
| PROMOTER (5bp); GENE BODY (195bp) | Glyma.18G163600 |
| GENE BODY                         | Glyma.18G181300 |
| PROMOTER                          | Glyma.18G181400 |
| GENE BODY                         | Glyma.18G181500 |
| GENE BODY                         | Glyma.18G184400 |
| GENE BODY                         | Glyma.18G184400 |
| GENE BODY                         | Glyma.18G196200 |
| GENE BODY (173bp); 3'UTR (27bp)   | Glyma.18G197600 |
| GENE BODY                         | Glyma.18G222100 |
| GENE BODY                         | Glyma.18G223300 |
| GENE BODY                         | Glyma.18G224000 |
| GENE BODY                         | Glyma.18G228000 |
| GENE BODY                         | Glyma.18G232900 |
| GENE BODY                         | Glyma.18G251900 |
| GENE BODY                         | Glyma.18G268000 |
| GENE BODY                         | Glyma.18G298100 |
| GENE BODY                         | Glyma.19G020200 |
| GENE BODY                         | Glyma.19G021700 |
| GENE BODY                         | Glyma.19G026600 |
| GENE BODY                         | Glyma.19G029100 |
| GENE BODY                         | Glyma.19G033500 |
| GENE BODY                         | Glyma.19G039100 |
| GENE BODY                         | Glyma.19G040800 |
| GENE BODY                         | Glyma.19G053500 |
| GENE BODY                         | Glyma.19G064200 |
| 5'UTR                             | Glyma.19G064300 |
| GENE BODY                         | Glyma.19G065700 |
| GENE BODY                         | Glyma.19G073600 |
| GENE BODY                         | Glyma.19G081600 |
| GENE BODY                         | Glyma.19G081600 |
| PROMOTER                          | Glyma.19G089900 |
| PROMOTER                          | Glyma.19G091700 |
| 3'UTR                             | Glyma.19G100500 |
| GENE BODY                         | Glyma.19G103200 |
| PROMOTER                          | Glyma.19G110900 |
| GENE BODY                         | Glyma.19G120400 |
| GENE BODY                         | Glyma.19G125800 |
| PROMOTER                          | Glyma.19G152000 |
| PROMOTER                          | Glyma.19G169700 |

|                                    |                 |
|------------------------------------|-----------------|
| PROMOTER (51bp); GENE BODY (149bp) | Glyma.19G169800 |
| GENE BODY                          | Glyma.19G170200 |
| GENE BODY                          | Glyma.19G175400 |
| PROMOTER (162bp); GENE BODY (38bp) | Glyma.19G184000 |
| PROMOTER (162bp); GENE BODY (38bp) | Glyma.19G184000 |
| GENE BODY                          | Glyma.19G186900 |
| GENE BODY                          | Glyma.19G191800 |
| GENE BODY                          | Glyma.19G191900 |
| 3'UTR                              | Glyma.19G204200 |
| PROMOTER                           | Glyma.19G214900 |
| 5'UTR                              | Glyma.19G217200 |
| GENE BODY                          | Glyma.19G229200 |
| GENE BODY                          | Glyma.19G237000 |
| GENE BODY                          | Glyma.19G239700 |
| PROMOTER                           | Glyma.19G242300 |
| GENE BODY                          | Glyma.19G256500 |
| PROMOTER                           | Glyma.19G261000 |
| GENE BODY                          | Glyma.19G261100 |
| GENE BODY                          | Glyma.20G005400 |
| GENE BODY                          | Glyma.20G005400 |
| GENE BODY                          | Glyma.20G028300 |
| GENE BODY                          | Glyma.20G036600 |
| GENE BODY                          | Glyma.20G049100 |
| GENE BODY                          | Glyma.20G052100 |
| GENE BODY                          | Glyma.20G052200 |
| GENE BODY                          | Glyma.20G058500 |
| GENE BODY                          | Glyma.20G074000 |
| PROMOTER (92bp); 5'UTR (108bp)     | Glyma.20G074000 |
| GENE BODY                          | Glyma.20G087700 |
| GENE BODY                          | Glyma.20G093200 |
| GENE BODY                          | Glyma.20G102800 |
| GENE BODY                          | Glyma.20G106900 |
| GENE BODY                          | Glyma.20G111200 |
| GENE BODY                          | Glyma.20G119300 |
| GENE BODY                          | Glyma.20G121600 |
| 3'UTR (151bp); GENE BODY (49bp)    | Glyma.20G126800 |
| GENE BODY (49bp); 3'UTR (151bp)    | Glyma.20G126800 |
| GENE BODY                          | Glyma.20G130800 |
| PROMOTER                           | Glyma.20G131200 |
| GENE BODY                          | Glyma.20G138600 |
| GENE BODY                          | Glyma.20G161800 |
| GENE BODY                          | Glyma.20G168100 |

|           |                 |
|-----------|-----------------|
| PROMOTER  | Glyma.20G168300 |
| GENE BODY | Glyma.20G170500 |
| PROMOTER  | Glyma.20G179900 |
| GENE BODY | Glyma.20G192200 |
| 3'UTR     | Glyma.20G207700 |
| GENE BODY | Glyma.20G239100 |
| GENE BODY | Glyma.20G242400 |
| GENE BODY | Glyma.20G244900 |
| GENE BODY | Glyma.U008400   |
| PROMOTER  | Glyma.U011500   |
| PROMOTER  | Glyma.U027500   |
| GENE BODY | Glyma.U028800   |
| GENE BODY | Glyma.U036800   |

---

| <b>GENE ANNOTATION</b>                                                 | <b>% Methylation Difference</b> |
|------------------------------------------------------------------------|---------------------------------|
| Regulator of Vps4 activity in the MVB pathway protein                  | 59.97067449                     |
| protein kinase family protein / peptidoglycan-binding LysM domain-cor  | 100                             |
| NSP-interacting kinase 3                                               | 100                             |
| N/A                                                                    | 75.92105263                     |
| TRICHOME BIREFRINGENCE-LIKE 27                                         | 31.07487923                     |
| RNI-like superfamily protein                                           | 79.48717949                     |
| pyruvate dehydrogenase complex E1 alpha subunit                        | 100                             |
| peroxisomal adenine nucleotide carrier 1                               | 53.65853659                     |
| N/A                                                                    | 48.25620389                     |
| SNF2 domain-containing protein / helicase domain-containing protein    | 50.71428571                     |
| SNF2 domain-containing protein / helicase domain-containing pro        | 72.72727273                     |
| Nucleoporin autopeptidase                                              | 100                             |
| Family of unknown function (DUF572)                                    | 86.66666667                     |
| tRNA arginine adenosine deaminase                                      | 90                              |
| Metal-dependent phosphohydrolase                                       | 56.48351648                     |
| Cysteine proteinases superfamily protein                               | 33.58517719                     |
| Disease resistance protein (TIR-NBS-LRR class) family                  | 25.70010973                     |
| Plant protein of unknown function (DUF247)                             | 62.5                            |
| arginase                                                               | 100                             |
| SLOW GROWTH 1                                                          | 100                             |
| elongation factor Ts family protein                                    | 30.35914703                     |
| N/A                                                                    | 46.2962963                      |
| DNA binding;zinc ion binding;nucleic acid binding;nucleic acid binding | 75.91836735                     |
| Cytochrome P450 superfamily protein                                    | 30.5785124                      |
| NmrA-like negative transcriptional regulator family protein            | 67.79661017                     |
| NmrA-like negative transcriptional regulator family protein            | 46.80427607                     |
| aminopeptidase P1                                                      | 55.93220339                     |
| Protein kinase superfamily protein                                     | 69.57328386                     |
| RNA-binding (RRM/RBD/RNP motifs) family protein                        | 44.44444444                     |
| RGPR-related                                                           | 65                              |
| DNAJ heat shock N-terminal domain-containing protein                   | 90.90909091                     |
| target of rapamycin                                                    | 29.7228895                      |
| histone deacetylase 1                                                  | 100                             |
| germin-like protein 10                                                 | 37.25490196                     |
| ATP binding cassette subfamily B4                                      | 81.81818182                     |
| nuclear encoded CLP protease 5                                         | 63.26530612                     |
| CTP synthase family protein                                            | 100                             |
| disease resistance protein (TIR-NBS-LRR class), putative               | 49.67479675                     |
| Calcium-dependent phosphotriesterase superfamily protein               | 33.33333333                     |
| beta-galactosidase 3                                                   | 34.48275862                     |
| Chaperone DnaJ-domain superfamily protein                              | 57.44680851                     |
| NAD(P)-binding Rossmann-fold superfamily protein                       | 50                              |
| Protein Transporter, Pam16                                             | 27.97131148                     |
| receptor like protein 6                                                | 32.37961226                     |

|                                                                        |             |
|------------------------------------------------------------------------|-------------|
| F-box family protein                                                   | 32.37961226 |
| mitochondrial editing factor 22                                        | 54.98502994 |
| ribosomal protein L23AB                                                | 90          |
| dihydrosphingosine phosphate lyase                                     | 85.71428571 |
| bZIP transcription factor family protein                               | 68.80503145 |
| Protein kinase superfamily protein                                     | 51.2195122  |
| RING/FYVE/PHD zinc finger superfamily protein                          | 27.53623188 |
| Plant protein of unknown function (DUF863)                             | 94.73684211 |
| SPIRAL1-like1                                                          | 30.81589349 |
| N/A                                                                    | 60          |
| N/A                                                                    | 26.309897   |
| glutamine synthetase 1;4                                               | 55.74712644 |
| ARM repeat superfamily protein                                         | 76          |
| ARM repeat superfamily protein                                         | 67.77939042 |
| N/A                                                                    | 33.33333333 |
| Chalcone and stilbene synthase family protein                          | 68.75       |
| fucosyltransferase 11                                                  | 37.70177839 |
| Phox-associated domain;Phox-like;Sorting nexin, C-terminal             | 29.10605847 |
| 5'-3' exonuclease family protein                                       | 29.12280702 |
| Haloacid dehalogenase-like hydrolase (HAD) superfamily protein         | 30.50847458 |
| DREB2A-interacting protein 2                                           | 39.90863787 |
| protein kinase family protein / protein phosphatase 2C ( PP2C) fa      | 80          |
| Protein kinase superfamily protein                                     | 28.03462885 |
| protein phosphatase 2A-4                                               | 32.10052157 |
| Phosphofructokinase family protein                                     | 38.91159939 |
| curculin-like (mannose-binding) lectin family protein / PAN domain-con | 48.38709677 |
| guanylate kinase                                                       | 44.28571429 |
| autoinhibited Ca <sup>2+</sup> -ATPase 11                              | 42.53373119 |
| AGAMOUS-like 80                                                        | 26.39573071 |
| amino acid permease 3                                                  | 40.53905391 |
| N/A                                                                    | 27.99797483 |
| C-terminal domain phosphatase-like 4                                   | 36.78215472 |
| auxin F-box protein 5                                                  | 100         |
| Restriction endonuclease, type II-like superfamily protein             | 41.91561845 |
| Restriction endonuclease, type II-like superfamily protein             | 32.09690807 |
| RING/U-box superfamily protein                                         | 67.3951049  |
| HEAT/U-box domain-containing protein                                   | 97.77777778 |
| Protein of unknown function, DUF593                                    | 36.81427627 |
| beta HLH protein 93                                                    | 45.60606061 |
| E3 ubiquitin ligase, putative                                          | 88.88888889 |
| Aldolase-type TIM barrel family protein                                | 38.65327381 |
| calmodulin-domain protein kinase 9                                     | 92.85714286 |
| Sucrase/ferredoxin-like family protein                                 | 36.92307692 |
| S-locus lectin protein kinase family protein                           | 46.96969697 |
| ENTH/VHS family protein                                                | 54.16666667 |



|                                                                         |             |
|-------------------------------------------------------------------------|-------------|
| cytochrome P450, family 86, subfamily A, polypeptide 8                  | 53.46594334 |
| RNAhelicase-like 8                                                      | 100         |
| RHO guanyl-nucleotide exchange factor 3                                 | 42.54807692 |
| NAD(P)-binding Rossmann-fold superfamily protein                        | 34.44444444 |
| NAD(P)-binding Rossmann-fold superfamily protein                        | 26.31641086 |
| growth-regulating factor 9                                              | 70.90909091 |
| LOB domain-containing protein 18                                        | 47.45762712 |
| Disease resistance protein (TIR-NBS-LRR class) family                   | 35.86956522 |
| Disease resistance protein (TIR-NBS-LRR class)                          | 43.88204225 |
| nodulin MtN21 /EamA-like transporter family protein                     | 29.95728155 |
| glycoprotease 1                                                         | 46.17034314 |
| GPI transamidase component Gpi16 subunit family protein                 | 86.20689655 |
| N/A                                                                     | 27.65557643 |
| IQ-domain 18                                                            | 29.63015246 |
| Vacuolar sorting protein 39                                             | 100         |
| Basic-leucine zipper (bZIP) transcription factor family protein         | 25.58922559 |
| P-loop containing nucleoside triphosphate hydrolases superfamily prot   | 70          |
| RECA homolog 3                                                          | 38.49486521 |
| N/A                                                                     | 100         |
| NIMA-related kinase 5                                                   | 55.3030303  |
| N/A                                                                     | 100         |
| debranching enzyme 1                                                    | 64.70588235 |
| Cyclophilin-like peptidyl-prolyl cis-trans isomerase family protein     | 36.84017595 |
| GroES-like zinc-binding dehydrogenase family protein                    | 100         |
| Basic-leucine zipper (bZIP) transcription factor family protein         | 47.22222222 |
| cullin 1                                                                | 33.91812865 |
| Prolyl oligopeptidase family protein                                    | 100         |
| glucose-6-phosphate dehydrogenase 4                                     | 100         |
| ATP binding microtubule motor family protein                            | 34.42622951 |
| ARM repeat superfamily protein                                          | 39.05187835 |
| Esterase/lipase/thioesterase family protein                             | 86.66666667 |
| Ankyrin repeat family protein                                           | 88.75       |
| Protein of unknown function (DUF3133)                                   | 73.33333333 |
| ER lumen protein retaining receptor family protein                      | 30.43478261 |
| switch subunit 3                                                        | 41.61573213 |
| Transmembrane amino acid transporter family protein                     | 42.01877934 |
| DNA glycosylase superfamily protein                                     | 38.33333333 |
| Protein of unknown function (DUF3223)                                   | 61.11111111 |
| glycine-rich protein                                                    | 39.3764063  |
| CTC-interacting domain 7                                                | 97.14285714 |
| Pentatricopeptide repeat (PPR) superfamily protein                      | 51.31578947 |
| Peptidyl-tRNA hydrolase II (PTH2) family protein                        | 90.90909091 |
| N/A                                                                     | 26.60215054 |
| sequence-specific DNA binding transcription factors;transcription regul | 52.10803689 |
| conserved peptide upstream open reading frame 37                        | 52.10803689 |
| O-fucosyltransferase family protein                                     | 95.65217391 |

|                                                                        |             |
|------------------------------------------------------------------------|-------------|
| P-loop containing nucleoside triphosphate hydrolases superfamily prot  | 100         |
| N/A                                                                    | 37.69230769 |
| Ribosomal protein S19e family protein                                  | 100         |
| nudix hydrolase homolog 16                                             | 41.41824752 |
| Thioredoxin z                                                          | 67.56756757 |
| glutathione S-transferase THETA 1                                      | 46.90635452 |
| N/A                                                                    | 25.55555556 |
| FAD/NAD(P)-binding oxidoreductase family protein                       | 31.57208089 |
| gamma subunit of Mt ATP synthase                                       | 90          |
| gamma subunit of Mt ATP synthase                                       | 42.35483871 |
| Protein kinase superfamily protein                                     | 29.87457001 |
| Galactose oxidase/kelch repeat superfamily protein                     | 77.14285714 |
| DCD (Development and Cell Death) domain protein                        | 100         |
| N/A                                                                    | 100         |
| Copine (Calcium-dependent phospholipid-binding protein) family         | 30.52691867 |
| ribonuclease II family protein                                         | 90          |
| ribonuclease II family protein                                         | 36.0673847  |
| P-loop containing nucleoside triphosphate hydrolases superfamily prot  | 26.46587061 |
| Metal-dependent protein hydrolase                                      | 30.49773756 |
| NADH-dependent glutamate synthase 1                                    | 44.23076923 |
| Protein of unknown function (DUF668)                                   | 80.90909091 |
| Protein of unknown function (DUF1644)                                  | 25.95866256 |
| O-fucosyltransferase family protein                                    | 64.54545455 |
| Smg-4/UPF3 family protein                                              | 59.46428571 |
| ADP-ribosylation factor A1B                                            | 34.14634146 |
| BED zinc finger ;hAT family dimerisation domain                        | 29.10158099 |
| HSP20-like chaperones superfamily protein                              | 100         |
| MA3 domain-containing protein                                          | 37.11340206 |
| homolog of nucleolar protein NOP56                                     | 28.191246   |
| YbaK/aminoacyl-tRNA synthetase-associated domain                       | 72.68009768 |
| O-fucosyltransferase family protein                                    | 100         |
| myb-like transcription factor family protein                           | 91.66666667 |
| Histone H3 K4-specific methyltransferase SET7/9 family protein         | 30.24509804 |
| N/A                                                                    | 86.36363636 |
| N/A                                                                    | 41.17406487 |
| N/A                                                                    | 36.91548692 |
| N/A                                                                    | 54.17909575 |
| FMN-linked oxidoreductases superfamily protein                         | 39.17349727 |
| Phototropic-responsive NPH3 family protein                             | 42.64705882 |
| N/A                                                                    | 85.71428571 |
| Calmodulin-binding transcription activator protein with CG-1 and Ankyr | 93.33333333 |
| chromatin remodeling 4                                                 | 64.2962963  |
| ENTH/VHS/GAT family protein                                            | 95.45454545 |
| ARID/BRIGHT DNA-binding domain;ELM2 domain protein                     | 28.44082036 |
| TRICHOME BIREFRINGENCE-LIKE 23Methylated_Region_promoter               | 100         |
| Tetratricopeptide repeat (TPR)-like superfamily protein                | 52.94117647 |

|                                                                 |             |
|-----------------------------------------------------------------|-------------|
| Mitochondrial ATP synthase subunit G protein                    | 86.66666667 |
| Mitochondrial ATP synthase subunit G protein                    | 90          |
| RNApolymerase sigma subunit 2                                   | 64.58333333 |
| Arabidopsis protein of unknown function (DUF241)                | 39.68957871 |
| Pyridoxal-dependent decarboxylase family protein                | 45.10324484 |
| autoinhibited Ca <sup>2+</sup> -ATPase 1                        | 66.66666667 |
| N/A                                                             | 66.66666667 |
| nuclear RNA polymerase D2A                                      | 35.88383838 |
| chorismate mutase 2                                             | 31.85823755 |
| LisH dimerisation motif;WD40/YVTN repeat-like-containing domain | 93.10344828 |
| transducin family protein / WD-40 repeat family protein         | 34.02808249 |
| MSCS-like 2                                                     | 31.14540866 |
| N/A                                                             | 28.92743222 |
| GATA-type zinc finger protein with TIFY domain                  | 28.52408308 |
| phosphoenolpyruvate carboxylase-related kinase 2                | 25.32994428 |
| alpha/beta-Hydrolases superfamily protein                       | 87.5        |
| N/A                                                             | 54.16666667 |
| Zn-dependent exopeptidases superfamily protein                  | 56.04288499 |
| Peptidase C78, ubiquitin fold modifier-specific peptidase 1/ 2  | 100         |
| Protein Transporter, Pam16                                      | 58          |
| myb domain protein 29                                           | 29.96389892 |
| N/A                                                             | 100         |
| nudix hydrolase homolog 19                                      | 64.28571429 |
| Peptidase C13 family                                            | 25.59348529 |
| nucleoporin-related                                             | 30.39688925 |
| Protein of unknown function (DUF3414)                           | 29.41176471 |
| diacylglycerol kinase 4                                         | 45.96553773 |
| Integrase-type DNA-binding superfamily protein                  | 27.41318891 |
| PHD finger family protein / bromo-adjacent homology (BAH) dom   | 62.62745098 |
| Nuclear pore complex protein                                    | 48.11594203 |
| S-locus lectin protein kinase family protein                    | 54.05405405 |
| S-locus lectin protein kinase family protein                    | 58.40727595 |
| S-locus lectin protein kinase family protein                    | 48.03921569 |
| N/A                                                             | 59.88323603 |
| O-methyltransferase family protein                              | 28.7049732  |
| Protein kinase superfamily protein                              | 62.16216216 |
| Ras-related small GTP-binding family protein                    | 26.06214331 |
| glutamate receptor 3.4                                          | 90          |
| Eukaryotic protein of unknown function (DUF842)                 | 50.45454545 |
| WPP domain interacting protein 1                                | 32.88299935 |
| SNARE-like superfamily protein                                  | 46.55172414 |
| O-fucosyltransferase family protein                             | 92.30769231 |
| exocyst subunit exo70 family protein G1                         | 42.37891738 |
| glucose-6-phosphate dehydrogenase 1                             | 100         |
| actin binding protein family                                    | 90          |
| phosphofructokinase 3                                           | 60.53030303 |

|                                                                     |             |
|---------------------------------------------------------------------|-------------|
| NAD(P)-binding Rossmann-fold superfamily protein                    | 40.15151515 |
| fatty acid desaturase 5                                             | 30          |
| Calcineurin-like metallo-phosphoesterase superfamily protein        | 78.66666667 |
| CBL-interacting protein kinase 9                                    | 50          |
| pentatricopeptide (PPR) repeat-containing protein                   | 27.51241226 |
| glyoxylate reductase 1                                              | 46.94656489 |
| ribosomal protein L5 B                                              | 100         |
| Copper transport protein family                                     | 30          |
| N/A                                                                 | 65.57377049 |
| N/A                                                                 | 65.57377049 |
| NF-X-like 1                                                         | 66.46766169 |
| Protein kinase superfamily protein                                  | 77.01149425 |
| Phosphoribosyltransferase family protein                            | 54.54545455 |
| delta 1-pyrroline-5-carboxylate synthase 2                          | 65.43478261 |
| DNAJ heat shock family protein                                      | 100         |
| beta glucosidase 11                                                 | 27.53567788 |
| SU(VAR)3-9 homolog 9                                                | 49.89316239 |
| SU(VAR)3-9 homolog 9                                                | 29.35613682 |
| basic helix-loop-helix (bHLH) DNA-binding superfamily protein       | 46.66666667 |
| SERINE CARBOXYPEPTIDASE-LIKE 49                                     | 25.34040518 |
| Chaperone DnaJ-domain superfamily protein                           | 30.70588235 |
| receptor kinase 1                                                   | 30.74176104 |
| HSP20-like chaperones superfamily protein                           | 41.02564103 |
| N/A                                                                 | 38.34512023 |
| Fumarylacetoacetate (FAA) hydrolase family                          | 44.68267581 |
| CBS domain-containing protein with a domain of unknown function (DL | 39.53488372 |
| RNA-binding (RRM/RBD/RNP motifs) family protein                     | 45.90163934 |
| alpha/beta-Hydrolases superfamily protein                           | 52.82258065 |
| tRNA/rRNA methyltransferase (SpoU) family protein                   | 100         |
| HMG (high mobility group) box protein with ARID/BRIGHT DNA-bi       | 33.56350701 |
| HMG (high mobility group) box protein with ARID/BRIGHT DNA-bi       | 82.35294118 |
| receptor kinase 3                                                   | 70.33898305 |
| HXXXD-type acyl-transferase family protein                          | 40.67085954 |
| HXXXD-type acyl-transferase family protein                          | 25.37042903 |
| Sec1/munc18-like (SM) proteins superfamily                          | 73.21428571 |
| double-stranded RNA binding protein-related / DsRBD protein-rel     | 38.82166791 |
| starch synthase 4                                                   | 71.23287671 |
| Minichromosome maintenance (MCM2/3/5) family protein                | 100         |
| Transketolase family protein                                        | 76.66666667 |
| Chalcone and stilbene synthase family protein                       | 28.18035427 |
| Protein of unknown function (DUF1644)                               | 92.59259259 |
| RAB GDP dissociation inhibitor 2                                    | 66.66666667 |
| leucine-rich repeat transmembrane protein kinase family protein     | 60.95571096 |
| aspartate aminotransferase                                          | 72.22222222 |
| nuclear pore anchor                                                 | 91.66666667 |
| ubiquinol-cytochrome C chaperone family protein                     | 88.23529412 |

|                                                                            |             |
|----------------------------------------------------------------------------|-------------|
| N/A                                                                        | 100         |
| DEA(D/H)-box RNA helicase family protein                                   | 100         |
| ubiquitin-specific protease 6                                              | 41.23861566 |
| N/A                                                                        | 29.06131938 |
| ATP-dependent peptidases;nucleotide binding;serine-type endopeptidase      | 27.16384739 |
| auxin transport protein (BIG)                                              | 45.45454545 |
| DNA/RNA polymerases superfamily protein                                    | 82.57359924 |
| male gametophyte defective 3                                               | 38.85714286 |
| Polyketide cyclase/dehydrase and lipid transport superfamily protein       | 29.52353942 |
| PIF1 helicase                                                              | 69.75524476 |
| Kinase interacting (KIP1-like) family protein                              | 36.40254341 |
| RNA-binding CRS1 / YhbY (CRM) domain-containing protein                    | 67.85714286 |
| Ankyrin-repeat containing protein                                          | 35.43379377 |
| TATA BOX ASSOCIATED FACTOR II 59                                           | 100         |
| Transducin/WD40 repeat-like superfamily protein                            | 40          |
| FAD/NAD(P)-binding oxidoreductase family protein                           | 30.82417582 |
| Protein of unknown function (DUF1644)                                      | 95.55555556 |
| pentatricopeptide (PPR) repeat-containing protein                          | 90.90909091 |
| tubulin folding cofactor E / Pfifferling (PFI)                             | 90          |
| Intron maturase, type II family protein                                    | 91.89189189 |
| hercules receptor kinase 2                                                 | 83.33333333 |
| GTP binding                                                                | 54.54545455 |
| toprim domain-containing protein                                           | 92.30769231 |
| Translation initiation factor SU11 family protein                          | 44.92753623 |
| Protein kinase superfamily protein                                         | 33.65732369 |
| Outer arm dynein light chain 1 protein                                     | 35.11705686 |
| Pentatricopeptide repeat (PPR-like) superfamily protein                    | 61.8556701  |
| SET domain protein 38                                                      | 33.61210673 |
| Nucleic acid-binding, OB-fold-like protein                                 | 74.87179487 |
| N/A                                                                        | 65          |
| N/A                                                                        | 25.89561738 |
| Core-2/I-branching beta-1,6-N-acetylglucosaminyltransferase family protein | 34.44055944 |
| Core-2/I-branching beta-1,6-N-acetylglucosaminyltransferase family protein | 37.430283   |
| N/A                                                                        | 62.87878788 |
| N/A                                                                        | 43.38413331 |
| N/A                                                                        | 72.95238095 |
| ATP-dependent Clp protease                                                 | 84.59459459 |
| N/A                                                                        | 29.14027149 |
| protein tyrosine kinase family protein                                     | 60.60606061 |
| zinc finger protein-related                                                | 56.66666667 |
| Protein of unknown function, DUF538                                        | 100         |
| NSP (nuclear shuttle protein)-interacting GTPase                           | 50          |
| sugar transporter 14                                                       | 49.31677019 |
| N/A                                                                        | 25.27472527 |
| N/A                                                                        | 25.27472527 |
| extra-large GTP-binding protein 3                                          | 29.68944099 |

|                                                                     |             |
|---------------------------------------------------------------------|-------------|
| N/A                                                                 | 65.46610169 |
| thioredoxin 2                                                       | 26.05433119 |
| sister chromatid cohesion 1 protein 4                               | 100         |
| LUC7 related protein                                                | 81.81818182 |
| GRIP-related ARF-binding domain-containing protein 1                | 68.75       |
| titan9                                                              | 82.22222222 |
| myosin XI D                                                         | 100         |
| ribonuclease Ps                                                     | 50          |
| Galactose oxidase/kelch repeat superfamily protein                  | 72.36842105 |
| NIMA-related kinase 4                                               | 90.90909091 |
| N/A                                                                 | 44.7582205  |
| N/A                                                                 | 44.7582205  |
| Pyridoxal-dependent decarboxylase family protein                    | 53.37209302 |
| chloroplast RNA-binding protein 29                                  | 77.27272727 |
| KCBP-interacting protein kinase                                     | 81.81818182 |
| SERINE CARBOXYPEPTIDASE-LIKE 49                                     | 100         |
| ARM repeat superfamily protein                                      | 34.81481481 |
| INO80 ortholog                                                      | 84.61538462 |
| N/A                                                                 | 31          |
| 10-formyltetrahydrofolate synthetase                                | 31          |
| Protein of unknown function (DUF155)                                | 26.36394252 |
| Transcriptional coactivator/pterin dehydratase                      | 35.38461538 |
| Protein kinase family protein with ARM repeat domain                | 32.13414634 |
| peroxisomal 3-ketoacyl-CoA thiolase 3                               | 78.81578947 |
| S-adenosyl-L-methionine-dependent methyltransferases superfamily p1 | 91.30434783 |
| anaphase-promoting complex/cyclosome 11                             | 92.85714286 |
| TOPLESS-related 3                                                   | 78.65497076 |
| N/A                                                                 | 100         |
| HSP20-like chaperones superfamily protein                           | 72.72727273 |
| zeta-carotene desaturase                                            | 57.14285714 |
| RNA-binding (RRM/RBD/RNP motifs) family protein                     | 35.88199265 |
| ubiquitin-specific protease 9                                       | 25.4854713  |
| N/A                                                                 | 49.0990991  |
| CAMV movement protein interacting protein 7                         | 30.76761525 |
| S-adenosyl-L-methionine-dependent methyltransferases superfamily p1 | 72.15189873 |
| N/A                                                                 | 56          |
| N/A                                                                 | 50.95757576 |
| TRAF-like superfamily protein                                       | 42.03931204 |
| phosphoenolpyruvate carboxylase 4                                   | 68.11594203 |
| N/A                                                                 | 58.65102639 |
| DHHC-type zinc finger family protein                                | 82.5        |
| Homeotic gene regulator                                             | 40.55258467 |
| NPK1-related protein kinase 3                                       | 84.61538462 |
| Endosomal targeting BRO1-like domain-containing protein             | 80          |
| Endosomal targeting BRO1-like domain-containing protein             | 77.5862069  |
| N/A                                                                 | 80          |

|                                                                       |             |
|-----------------------------------------------------------------------|-------------|
| N/A                                                                   | 77.5862069  |
| trehalose phosphatase/synthase 5                                      | 96          |
| N/A                                                                   | 34.11329137 |
| N/A                                                                   | 78          |
| ATP-dependent RNA helicase, mitochondrial (SUV3)                      | 28.52049911 |
| KH domain-containing protein                                          | 80          |
| Leucine-rich repeat protein kinase family protein                     | 90.90909091 |
| hydroxymethylglutaryl-CoA synthase / HMG-CoA synthase / 3-hydroxy-    | 100         |
| Restriction endonuclease, type II-like superfamily protein            | 32.67973856 |
| N/A                                                                   | 47.56097561 |
| Carbohydrate-binding protein                                          | 40.38461538 |
| plant U-box 49                                                        | 62.71186441 |
| Pentatricopeptide repeat (PPR) superfamily protein                    | 90          |
| SET domain-containing protein                                         | 36.09460279 |
| N/A                                                                   | 75.51020408 |
| Phosphatidylinositol 3- and 4-kinase family protein with FAT domain   | 67.85714286 |
| RNA polymerase II large subunit                                       | 33.79120879 |
| Major facilitator superfamily protein                                 | 29.7399605  |
| NAC domain containing protein 36                                      | 50          |
| Chloroplast Ycf2;ATPase, AAA type, core                               | 40.24435394 |
| AP2/B3-like transcriptional factor family protein                     | 25.30742459 |
| P-loop containing nucleoside triphosphate hydrolases superfamily prot | 72.72727273 |
| P-loop containing nucleoside triphosphate hydrolases superfamily      | 31.73884691 |
| Putative glycosyl hydrolase of unknown function (DUF1680)             | 100         |
| Tetratricopeptide repeat (TPR)-like superfamily protein               | 76.92307692 |
| binding                                                               | 40.98039216 |
| AICARFT/IMPCHase bienzyme family protein                              | 60.60606061 |
| Insulinase (Peptidase family M16) family protein                      | 60.38647343 |
| homolog of histone chaperone HIRA                                     | 35.48387097 |
| N/A                                                                   | 31.2307261  |
| cleavage and polyadenylation specificity factor 100                   | 100         |
| Lecithin:cholesterol acyltransferase family protein                   | 36.81006494 |
| transcription factor-related                                          | 25.05145798 |
| DegP protease 7                                                       | 47.43961353 |
| CRINKLY4 related 3                                                    | 26.5625     |
| N/A                                                                   | 58.20895522 |
| Pentatricopeptide repeat (PPR) superfamily protein                    | 90          |
| Methylthiotransferase                                                 | 80          |
| N/A                                                                   | 29.6875     |
| nucleolin like 2                                                      | 51.45424837 |
| Calcium-dependent lipid-binding (CaLB domain) family protein          | 33.01127214 |
| AAA-type ATPase family protein                                        | 38.21428571 |
| Far-red impaired responsive (FAR1) family protein                     | 76          |
| protein kinase family protein                                         | 50          |
| ARM repeat superfamily protein                                        | 100         |
| cell division cycle protein 48-related / CDC48-related                | 100         |

|                                                                       |             |
|-----------------------------------------------------------------------|-------------|
| N/A                                                                   | 100         |
| BRI1 suppressor 1 (BSU1)-like 2                                       | 100         |
| Protein of unknown function (DUF604)                                  | 100         |
| NAD(P)H dehydrogenase B1                                              | 100         |
| Uncharacterised conserved protein (UCP012943)                         | 36.23188406 |
| Uncharacterised conserved protein (UCP012943)                         | 36.23188406 |
| isoprenoid F                                                          | 36.23188406 |
| Quinone reductase family protein                                      | 40.74074074 |
| Nucleotide-diphospho-sugar transferases superfamily protein           | 58.33333333 |
| purine permease 5                                                     | 43.65576284 |
| N/A                                                                   | 50          |
| N/A                                                                   | 50          |
| phosphoesterase                                                       | 100         |
| Nucleotide/sugar transporter family protein                           | 25.77436524 |
| DNA/RNA helicase protein                                              | 61.52829191 |
| Leucine-rich repeat protein kinase family protein                     | 71.42857143 |
| mitochondrial editing factor 20                                       | 51.12299465 |
| Plasma-membrane choline transporter family protein                    | 29.65772433 |
| Leucine-rich repeat transmembrane protein kinase                      | 44.27058257 |
| PIF1 helicase                                                         | 49.75490196 |
| 2-isopropylmalate synthase 1                                          | 34.35143288 |
| P-loop containing nucleoside triphosphate hydrolases superfamily      | 27.53968254 |
| plastid division1                                                     | 100         |
| phosphoglycerate kinase 1                                             | 38.18466354 |
| glycosyl hydrolase family 81 protein                                  | 67.27272727 |
| N/A                                                                   | 57.26227795 |
| ARM repeat superfamily protein                                        | 100         |
| Phosphoglycerate mutase-like family protein                           | 26.02397602 |
| protein kinase 2A                                                     | 36.1025641  |
| Tetratricopeptide repeat (TPR)-like superfamily protein               | 71.02272727 |
| glutamate receptor 2.5                                                | 26.51724138 |
| Ribosomal protein L18ae family                                        | 71.875      |
| N/A                                                                   | 37.34939759 |
| P-loop containing nucleoside triphosphate hydrolases superfamily prot | 43.63636364 |
| Rho termination factor                                                | 70.50092764 |
| Leucine-rich repeat transmembrane protein kinase family protein       | 52.10803689 |
| Transducin/WD40 repeat-like superfamily protein                       | 37.10462287 |
| Transducin/WD40 repeat-like superfamily protein                       | 68.88888889 |
| ACT-like superfamily protein                                          | 42.22222222 |
| ser/arg-rich protein kinase 4                                         | 81.03448276 |
| N/A                                                                   | 32.35294118 |
| Ubiquitin C-terminal hydrolases superfamily protein                   | 71.42857143 |
| Leucine-rich repeat family protein                                    | 64          |
| receptor-like protein kinase 1                                        | 63.39522546 |
| Tetratricopeptide repeat (TPR)-like superfamily protein               | 27.808136   |
| NAD(P)-binding Rossmann-fold superfamily protein                      | 51.46871009 |



|                                                                     |             |
|---------------------------------------------------------------------|-------------|
| Phototropic-responsive NPH3 family protein                          | 90.90909091 |
| Protein of unknown function (DUF1000)                               | 48.14814815 |
| Protein of unknown function (DUF1000)                               | 35.48387097 |
| Telomerase activating protein Est1                                  | 100         |
| Ribonuclease E inhibitor RraA/Dimethylmenaquinone methyltransferas  | 85.71428571 |
| UDP-Glycosyltransferase superfamily protein                         | 53.37398374 |
| Protein of unknown function (DUF1421)                               | 94.44444444 |
| Homeodomain-like superfamily protein                                | 31.49983148 |
| Transmembrane amino acid transporter family protein                 | 42.83876501 |
| ARM repeat superfamily protein                                      | 74.63002114 |
| ARM repeat superfamily protein                                      | 80.85106383 |
| triosephosphate isomerase                                           | 56.41025641 |
| A20/AN1-like zinc finger family protein                             | 86.36363636 |
| topoisomerase 6 subunit B                                           | 66.66666667 |
| crinkly4                                                            | 29.78723404 |
| CTC-interacting domain 4                                            | 100         |
| Protein phosphatase 2A, regulatory subunit PR55                     | 94.44444444 |
| pleiotropic drug resistance 12                                      | 48.93617021 |
| Pre-mRNA-processing-splicing factor                                 | 90          |
| cation exchanger 2                                                  | 79.90196078 |
| HEAT SHOCK PROTEIN 89.1                                             | 70.76923077 |
| Kinase-related protein of unknown function (DUF1296)                | 100         |
| Subtilisin-like serine endopeptidase family protein                 | 30.08605621 |
| ARM repeat superfamily protein                                      | 65.83333333 |
| S-adenosyl-L-methionine-dependent methyltransferases superfamily pr | 37.14285714 |
| ubiquitin-specific protease 22                                      | 27.93471438 |
| TRS120                                                              | 41.15853659 |
| plant glycogenin-like starch initiation protein 2                   | 25.88614393 |
| plastid division1                                                   | 40.90909091 |
| Ribosomal protein L33 family protein                                | 87.5        |
| ArfGap/RecO-like zinc finger domain-containing protein              | 61.73076923 |
| N/A                                                                 | 53.65853659 |
| N/A                                                                 | 42.36641221 |
| bromo-adjacent homology (BAH) domain-containing protein             | 26.08727255 |
| Sulfite exporter TauE/SafE family protein                           | 100         |
| ENTH/VHS/GAT family protein                                         | 30.81106097 |
| N/A                                                                 | 77.36842105 |
| long chain acyl-CoA synthetase 9                                    | 28.74006453 |
| long chain acyl-CoA synthetase 9                                    | 25.74065842 |
| N/A                                                                 | 28.74006453 |
| copper ion binding;cobalt ion binding;zinc ion binding              | 53.14723591 |
| hydroxyproline-rich glycoprotein family protein                     | 90.90909091 |
| Restriction endonuclease, type II-like superfamily protein          | 90.90909091 |
| exocyst subunit exo70 family protein B1                             | 26.73299101 |
| WRKY DNA-binding protein 4                                          | 46.66666667 |
| autophagy protein Apg5 family                                       | 91.30434783 |

|                                                                      |             |
|----------------------------------------------------------------------|-------------|
| P-loop containing nucleoside triphosphate hydrolases superfamily     | 55.84795322 |
| Lactoylglutathione lyase / glyoxalase I family protein               | 42.42424242 |
| CASC3/Barentsz eIF4AIII binding                                      | 36.69172932 |
| chitinase A                                                          | 100         |
| IQ-domain 26                                                         | 25.36774316 |
| Phosphatidylinositol-4-phosphate 5-kinase family protein             | 25.42982563 |
| Plant protein of unknown function (DUF639)                           | 95.65217391 |
| Tetratricopeptide repeat (TPR)-like superfamily protein              | 58.97435897 |
| Protein of unknown function (DUF506)                                 | 41.70702179 |
| Pentatricopeptide repeat (PPR) superfamily protein                   | 47.61904762 |
| plant U-box 17                                                       | 65.625      |
| auxin response factor 8                                              | 76.19047619 |
| cullin4                                                              | 31.27548049 |
| alpha-mannosidase 3                                                  | 93.33333333 |
| potassium channel in Arabidopsis thaliana 1                          | 93.33333333 |
| Inositol monophosphatase family protein                              | 68.29268293 |
| Ribosomal protein L12/ ATP-dependent Clp protease adaptor protein C  | 100         |
| ATP-citrate lyase B-1                                                | 25.49019608 |
| N/A                                                                  | 92.30769231 |
| N/A                                                                  | 48.33232262 |
| MLP-like protein 423                                                 | 30.76825598 |
| N/A                                                                  | 88.23529412 |
| MAP kinase kinase 2                                                  | 25.34235026 |
| Mob1/phocein family protein                                          | 53.84615385 |
| Mob1/phocein family protein                                          | 31.42955024 |
| zinc ion binding;nucleic acid binding                                | 26.63851351 |
| N/A                                                                  | 53.08641975 |
| cyclophilin 59                                                       | 35.36214242 |
| ARM repeat superfamily protein                                       | 84.61538462 |
| Polynucleotidyl transferase, ribonuclease H-like superfamily protein | 60.41666667 |
| PREFOLDIN 1                                                          | 52.17391304 |
| Major facilitator superfamily protein                                | 34.04761905 |
| RING/U-box superfamily protein                                       | 41.04991394 |
| Trypsin family protein                                               | 53.03030303 |
| TTF-type zinc finger protein with HAT dimerisation domain            | 39.39393939 |
| Cellulose synthase family protein                                    | 80          |
| Pectin lyase-like superfamily protein                                | 26.88948716 |
| magnesium ion binding;thiamin pyrophosphate binding;hydro-lya        | 60.90909091 |
| magnesium ion binding;thiamin pyrophosphate binding;hydro-lya        | 26.07551487 |
| ATPases;nucleotide binding;ATP binding;nucleoside-triphosphatases;tr | 26.66666667 |
| N/A                                                                  | 37.9273377  |
| transcription coactivators                                           | 25.19660271 |
| transducin family protein / WD-40 repeat family protein              | 100         |
| Protein kinase superfamily protein                                   | 54.54545455 |
| pentatricopeptide (PPR) repeat-containing protein                    | 86.14718615 |

|                                                                     |             |
|---------------------------------------------------------------------|-------------|
| Ribosomal protein L25/Gln-tRNA synthetase, anti-codon-binding (     | 29.32118165 |
| apyrase 2                                                           | 74.46428571 |
| S-adenosyl-L-methionine-dependent methyltransferases superfamily pr | 71.52777778 |
| RNA-binding (RRM/RBD/RNP motifs) family protein                     | 76.59574468 |
| golgin candidate 1                                                  | 88.57142857 |
| Sec23/Sec24 protein transport family protein                        | 100         |
| Spc97 / Spc98 family of spindle pole body (SBP) component           | 46.9581749  |
| hAT transposon superfamily                                          | 46.9581749  |
| N/A                                                                 | 100         |
| yeast YAK1-related gene 1                                           | 29.41306267 |
| yeast YAK1-related gene 1                                           | 37.68684146 |
| N/A                                                                 | 29.41306267 |
| compromised recognition of TCV 1                                    | 61.53846154 |
| compromised recognition of TCV 1                                    | 100         |
| Protein kinase superfamily protein                                  | 51.2195122  |
| Protein kinase superfamily protein                                  | 33.0977918  |
| TatD related DNase                                                  | 27.64804003 |
| disease resistance family protein / LRR family protein              | 35.75989783 |
| Heavy metal transport/detoxification superfamily protein            | 25.46975547 |
| Heavy metal transport/detoxification superfamily protein            | 43.20987654 |
| NAD(P)-binding Rossmann-fold superfamily protein                    | 44.68438538 |
| disease resistance family protein / LRR family protein              | 31.52856408 |
| disease resistance family protein / LRR family protein              | 43.96551724 |
| disease resistance family protein / LRR family protein              | 28.98351648 |
| CAP160 protein                                                      | 52.38095238 |
| F-box/RNI-like superfamily protein                                  | 44.11764706 |
| hydroxyproline-rich glycoprotein family protein                     | 72.80701754 |
| microtubule-associated proteins 70-5                                | 28.57699805 |
| Sapoin-like aspartyl protease family protein                        | 100         |
| tobamovirus multiplication 1                                        | 52.38095238 |
| phospholipases;galactolipases                                       | 30.80467919 |
| RING/U-box superfamily protein                                      | 53.8764266  |
| N/A                                                                 | 45.65217391 |
| N/A                                                                 | 35.11047895 |
| calmodulin binding;transcription regulators                         | 64.28571429 |
| PAS domain-containing protein tyrosine kinase family protein        | 100         |
| ARM repeat superfamily protein                                      | 71.42857143 |
| Transducin/WD40 repeat-like superfamily protein                     | 54.23728814 |
| Alg9-like mannosyltransferase family                                | 69.78609626 |
| Alg9-like mannosyltransferase family                                | 42.5210084  |
| Phosphoribulokinase / Uridine kinase family                         | 44.15584416 |
| dicer-like 4                                                        | 26.52358691 |
| dicer-like 4                                                        | 29.53384419 |
| N/A                                                                 | 33.30395829 |
| glucuronidase 3                                                     | 68.29268293 |

|                                                                 |             |
|-----------------------------------------------------------------|-------------|
| early nodulin-related                                           | 55          |
| fatty acyl-ACP thioesterases B                                  | 28.38612368 |
| histone deacetylase 15                                          | 47.54299754 |
| Transcription factor TFIIE, alpha subunit                       | 57.89473684 |
| arogenate dehydrogenase                                         | 29.15662651 |
| Class I peptide chain release factor                            | 76.4516129  |
| Phosphatidic acid phosphatase (PAP2) family protein             | 68.75       |
| protein arginine methyltransferase 7                            | 90.90909091 |
| MITOCHONDRIAL FERREDOXIN 2                                      | 26.43008475 |
| Protein of unknown function, DUF547                             | 25.83832335 |
| PPPDE putative thiol peptidase family protein                   | 91.66666667 |
| Plant VAMP (vesicle-associated membrane protein) family protein | 75          |
| N/A                                                             | 37.67292127 |
| Tetratricopeptide repeat (TPR)-like superfamily protein         | 45.31965561 |
| casein kinase alpha 1                                           | 69.49152542 |
| MRG family protein                                              | 63.08243728 |
| Plant protein of unknown function (DUF869)                      | 74.55197133 |
| PLC-like phosphodiesterases superfamily protein                 | 28.39068826 |
| ABC1 family protein                                             | 44.42361762 |
| Mitochondrial substrate carrier family protein                  | 44.91869919 |
| phytochrome interacting factor 3                                | 90.90909091 |
| mitotic-like cyclin 3B from Arabidopsis                         | 100         |
| histidine kinase 5                                              | 25.83476027 |
| Protein of unknown function (DUF1336)                           | 38.98305085 |
| N/A                                                             | 86.42857143 |
| N/A                                                             | 38.09195402 |
| N/A                                                             | 38.09195402 |
| GYF domain-containing protein                                   | 56          |
| DNA repair-recombination protein (RAD50)                        | 43.44086022 |
| ubiquitin-specific protease 4                                   | 52          |
| Protein of unknown function (DUF630 and DUF632)                 | 45.27272727 |
| Uroporphyrinogen decarboxylase                                  | 55.69620253 |
| DegP protease 7                                                 | 92.30769231 |
| ALWAYS EARLY 4                                                  | 40.47354791 |
| Homeodomain-like superfamily protein                            | 37.89431384 |
| nodulin MtN21 /EamA-like transporter family protein             | 29.69866418 |
| nodulin MtN21 /EamA-like transporter family protein             | 47.60273973 |
| smr (Small MutS Related) domain-containing protein              | 95.23809524 |
| RNA helicase, ATP-dependent, SK12/DOB1 protein                  | 60          |
| Neutral/alkaline non-lysosomal ceramidase                       | 64.19828641 |
| beta-1,2-xylosyltransferase                                     | 51.66666667 |
| beta-1,2-xylosyltransferase                                     | 51.66666667 |
| N/A                                                             | 52.07017544 |
| MAP kinase 20                                                   | 29.78723404 |
| Mitochondrial transcription termination factor family protein   | 57.33863837 |
| pleckstrin homology (PH) domain-containing protein              | 33.33333333 |

|                                                                         |             |
|-------------------------------------------------------------------------|-------------|
| N/A                                                                     | 76.30136986 |
| DEA(D/H)-box RNA helicase family protein                                | 28.50980392 |
| trehalose phosphate synthase                                            | 100         |
| Radical SAM superfamily protein                                         | 32.82940361 |
| hAT transposon superfamily                                              | 32.82940361 |
| Phototropic-responsive NPH3 family protein                              | 40.36697248 |
| plant U-box 9                                                           | 100         |
| N/A                                                                     | 80          |
| myb-like HTH transcriptional regulator family protein                   | 45.47088426 |
| N/A                                                                     | 45.47088426 |
| protein kinase 1B                                                       | 92.85714286 |
| Sulfite exporter TauE/SafE family protein                               | 27.42470296 |
| Sulfite exporter TauE/SafE family protein                               | 27.13503838 |
| mRNA capping enzyme family protein                                      | 49.24098672 |
| sulfoquinovosyldiacylglycerol 2                                         | 41.19743407 |
| zinc finger protein-related                                             | 54.28571429 |
| WD-40 repeat family protein / beige-related                             | 75.47619048 |
| Calcium-dependent lipid-binding (CaLB domain) family protein            | 100         |
| 5\'-3\' exonuclease family protein                                      | 75          |
| RNA polymerase II transcription mediators                               | 56          |
| Protein of unknown function (DUF630 and DUF632)                         | 100         |
| Leucine-rich repeat receptor-like protein kinase family protein         | 30.48780488 |
| TCP-1/cpn60 chaperonin family protein                                   | 39.0625     |
| Pectate lyase family protein                                            | 55          |
| N/A                                                                     | 78.33333333 |
| purple acid phosphatase 23                                              | 61.11111111 |
| PHD finger family protein                                               | 100         |
| COBRA-like extracellular glycosyl-phosphatidyl inositol-anchored protei | 78.57142857 |
| NSP-interacting kinase 1                                                | 75.97402597 |
| Proline-rich spliceosome-associated (PSP) family protein / zinc knuckle | 77.27272727 |
| NAD-dependent glycerol-3-phosphate dehydrogenase family protein         | 54.16666667 |
| N/A                                                                     | 29.73402476 |
| N/A                                                                     | 29.73402476 |
| Got1/Sft2-like vesicle transport protein family                         | 76.29233512 |
| NAD <sup>+</sup> transporter 2                                          | 73.21428571 |
| alpha/beta-Hydrolases superfamily protein                               | 65.90909091 |
| alpha/beta-Hydrolases superfamily protein                               | 55.51971326 |
| Nucleotide-diphospho-sugar transferase family protein                   | 27.91421653 |
| zinc ion binding;nucleic acid binding;zinc ion binding                  | 88.46153846 |
| N/A                                                                     | 25.95070423 |
| Glycosyl hydrolase family 38 protein                                    | 76.47058824 |
| H/ACA ribonucleoprotein complex, subunit Gar1/Naf1 protein              | 37.57338552 |
| 2-isopropylmalate synthase 1                                            | 40          |
| disproportionating enzyme 2                                             | 100         |
| homolog of yeast autophagy 18 (ATG18) G                                 | 41.18744699 |
| response regulator 24                                                   | 25.33151059 |

|                                                                          |             |
|--------------------------------------------------------------------------|-------------|
| ENTH/VHS/GAT family protein                                              | 25.33151059 |
| plus-3 domain-containing protein                                         | 84.84848485 |
| ankyrin repeat family protein                                            | 63.0952381  |
| Ribosomal protein L4/L1 family                                           | 49.14021164 |
| Ribosomal protein L4/L1 family                                           | 41.63925247 |
| ARM repeat superfamily protein                                           | 54.54545455 |
| ENTH/VHS family protein                                                  | 38.55421687 |
| ENTH/VHS family protein                                                  | 100         |
| Cleavage and polyadenylation specificity factor (CPSF) A subunit protein | 42.82296651 |
| myb domain protein 12                                                    | 60.15037594 |
| HIT zinc finger ;PAPA-1-like conserved region                            | 30.6122449  |
| N/A                                                                      | 32.14101904 |
| D-aminoacid aminotransferase-like PLP-dependent enzymes superfami        | 65.78947368 |
| DNAJ heat shock N-terminal domain-containing protein                     | 92.85714286 |
| O-acetylserine (thiol) lyase (OAS-TL) isoform A1                         | 32.98980877 |
| zinc knuckle (CCHC-type) family protein                                  | 100         |
| Protein kinase superfamily protein                                       | 28.97637795 |
| pyrophosphorylase 3                                                      | 30.53167421 |
| SU(VAR)3-9 homolog 9                                                     | 39.9897855  |
| SU(VAR)3-9 homolog 9                                                     | 75.58441558 |
| N/A                                                                      | 64.45182724 |
| Protein of unknown function (DUF1666)                                    | 100         |
| N/A                                                                      | 26.84431609 |
| N/A                                                                      | 29.86111111 |
| N/A                                                                      | 29.86111111 |
| N/A                                                                      | 29.75663267 |
| N/A                                                                      | 27.41523734 |
| N/A                                                                      | 26.71641791 |
| N/A                                                                      | 26.52051783 |
| urease accessory protein D                                               | 63.33333333 |
| urease accessory protein D                                               | 48.96551724 |
| Protein of unknown function (DUF668)                                     | 92.30769231 |
| Protein kinase superfamily protein                                       | 57.77777778 |
| Nucleotidyl transferase superfamily protein                              | 100         |
| translation initiation factor 3 (IF-3) family protein                    | 38.83888389 |
| clathrin adaptor complexes medium subunit family protein                 | 90.47619048 |
| Protein kinase superfamily protein                                       | 28.09044397 |
| Ubiquitin-like superfamily protein                                       | 45.90301003 |
| Cyclase family protein                                                   | 92          |
| Cyclase family protein                                                   | 87.01298701 |
| Homeodomain-like protein with RING/FYVE/PHD-type zinc finger doma        | 70          |
| transducin family protein / WD-40 repeat family protein                  | 36.71096346 |
| cysteine-rich RLK (RECEPTOR-like protein kinase) 29                      | 25.71022727 |
| Methyltransferase MT-A70 family protein                                  | 35.17412698 |
| ribosomal protein 1                                                      | 65.30612245 |

|                                                      |             |
|------------------------------------------------------|-------------|
| Protein of unknown function (DUF1278)                | 65.30612245 |
| DNAse I-like superfamily protein                     | 27.99422799 |
| phosphoglucosamine mutase family protein             | 33.45079967 |
| lactate/malate dehydrogenase family protein          | 100         |
| COP1-interacting protein-related METHYLATED_REGIONS  | 59.04761905 |
| syntaxin of plants 43                                | 68.88888889 |
| N/A                                                  | 100         |
| glucan synthase-like 10                              | 32.58444619 |
| carboxyl terminus of HSC70-interacting protein       | 54          |
| TBP-associated factor 7                              | 34.05839274 |
| myb domain protein 1                                 | 36.25       |
| N/A                                                  | 74.46808511 |
| GroES-like zinc-binding dehydrogenase family protein | 37.23522854 |

---

| q value     | P value     |
|-------------|-------------|
| 0.00460124  | 8.70901E-06 |
| 2.6925E-08  | 4.08726E-12 |
| 3.38582E-06 | 1.07761E-09 |
| 5.06491E-06 | 2.03203E-09 |
| 6.68106E-07 | 3.95286E-10 |
| 0.001294834 | 2.02341E-06 |
| 0.000703795 | 7.39602E-07 |
| 0.002540759 | 4.03019E-06 |
| 5.27234E-05 | 8.72624E-08 |
| 0.001320947 | 1.68651E-06 |
| 0.005609672 | 1.56869E-05 |
| 0.000115391 | 7.66995E-08 |
| 0.008526819 | 2.01911E-05 |
| 0.009452001 | 3.40217E-05 |
| 0.003119226 | 6.7176E-06  |
| 4.85284E-05 | 7.87667E-08 |
| 7.82947E-08 | 1.39522E-11 |
| 0.000135885 | 1.07333E-07 |
| 0.005353107 | 1.08251E-05 |
| 0.005353107 | 1.08251E-05 |
| 3.12975E-06 | 2.64803E-09 |
| 0.005823103 | 1.21106E-05 |
| 2.4749E-05  | 1.12889E-08 |
| 0.002048788 | 3.05751E-06 |
| 2.79341E-06 | 8.48089E-10 |
| 4.15523E-28 | 1.47718E-33 |
| 0.003095952 | 6.61666E-06 |
| 0.006793816 | 1.48569E-05 |
| 0.004287198 | 7.92597E-06 |
| 0.002159916 | 4.06449E-06 |
| 1.40706E-05 | 5.73713E-09 |
| 0.00014026  | 1.11525E-07 |
| 1.13095E-05 | 4.42884E-09 |
| 8.05292E-08 | 1.44686E-11 |
| 0.001920592 | 2.72816E-06 |
| 0.001455847 | 1.90893E-06 |
| 0.001240448 | 1.54644E-06 |
| 0.006456384 | 1.94615E-05 |
| 0.001021467 | 1.19629E-06 |
| 0.000433394 | 4.69811E-07 |
| 0.001337013 | 1.70997E-06 |
| 0.009463526 | 2.31518E-05 |
| 0.008193419 | 1.91181E-05 |
| 1.39808E-05 | 1.65863E-08 |



|             |             |
|-------------|-------------|
| 1.39808E-05 | 1.65863E-08 |
| 5.12709E-08 | 1.04358E-11 |
| 5.18275E-05 | 2.85434E-08 |
| 0.004907369 | 9.52608E-06 |
| 0.001232024 | 1.8929E-06  |
| 0.000310115 | 2.56757E-07 |
| 0.002670807 | 4.29593E-06 |
| 0.000566467 | 5.49176E-07 |
| 4.20563E-12 | 3.84453E-16 |
| 0.003662749 | 8.39622E-06 |
| 0.005247154 | 4.11999E-05 |
| 0.004907369 | 9.53081E-06 |
| 0.004550831 | 8.57689E-06 |
| 0.004317217 | 1.06809E-05 |
| 0.000657565 | 8.02622E-07 |
| 1.7072E-06  | 5.784E-10   |
| 5.09444E-06 | 1.73768E-09 |
| 3.23379E-05 | 1.56517E-08 |
| 0.005960371 | 1.71725E-05 |
| 1.32233E-10 | 2.10868E-14 |
| 1.69713E-05 | 2.09871E-08 |
| 0.003972467 | 9.44718E-06 |
| 0.000356021 | 3.65834E-07 |
| 0.000132613 | 1.04313E-07 |
| 6.74157E-09 | 1.10661E-12 |
| 0.001192665 | 1.44926E-06 |
| 0.005131118 | 1.01792E-05 |
| 2.81216E-14 | 1.41389E-18 |
| 0.003714523 | 8.59229E-06 |
| 0.000164662 | 1.37101E-07 |
| 6.42586E-05 | 1.11935E-07 |
| 0.001377452 | 2.20316E-06 |
| 0.001933999 | 2.83514E-06 |
| 2.53603E-13 | 1.06007E-17 |
| 7.29404E-07 | 2.17429E-10 |
| 0.00422635  | 7.77938E-06 |
| 2.56349E-09 | 3.00785E-13 |
| 0.00139898  | 1.80373E-06 |
| 0.000306483 | 3.01246E-07 |
| 0.000299513 | 2.45563E-07 |
| 0.002484903 | 1.43562E-05 |
| 0.002750196 | 5.60865E-06 |
| 0.005115318 | 1.01284E-05 |
| 1.14187E-08 | 1.55753E-12 |
| 0.000424206 | 3.80149E-07 |

|             |             |
|-------------|-------------|
| 0.002554241 | 5.07318E-06 |
| 1.41839E-07 | 2.80843E-11 |
| 1.73353E-08 | 5.27349E-12 |
| 0.00177142  | 3.08453E-06 |
| 1.6306E-05  | 1.99491E-08 |
| 0.004876312 | 9.42644E-06 |
| 0.000581895 | 5.66904E-07 |
| 0.004842753 | 1.26584E-05 |
| 9.97353E-05 | 1.93721E-07 |
| 0.003249293 | 7.10975E-06 |
| 1.22391E-05 | 5.76987E-09 |
| 7.97829E-06 | 2.9254E-09  |
| 0.000166113 | 1.39389E-07 |
| 0.000705533 | 8.81092E-07 |
| 3.22217E-05 | 1.55009E-08 |
| 7.55432E-06 | 7.88784E-09 |
| 0.005646129 | 1.16556E-05 |
| 3.87195E-05 | 2.31901E-08 |
| 0.001240448 | 1.54644E-06 |
| 3.94734E-05 | 2.00027E-08 |
| 3.64193E-07 | 9.73494E-11 |
| 0.000501408 | 4.69924E-07 |
| 0.001911271 | 9.9095E-06  |
| 2.39209E-05 | 1.08037E-08 |
| 0.004284865 | 7.91851E-06 |
| 0.00010721  | 2.12289E-07 |
| 0.001933999 | 2.83514E-06 |
| 0.005353107 | 1.08251E-05 |
| 0.009560258 | 9.83182E-05 |
| 0.00460124  | 8.70536E-06 |
| 0.003440723 | 5.98256E-06 |
| 7.33139E-05 | 4.39252E-08 |
| 0.005282421 | 1.05794E-05 |
| 0.00319357  | 5.4287E-06  |
| 0.002243341 | 3.45642E-06 |
| 0.00303548  | 1.90357E-05 |
| 0.00112567  | 1.35052E-06 |
| 0.000713436 | 7.53919E-07 |
| 0.003161348 | 5.35538E-06 |
| 2.92739E-06 | 8.99497E-10 |
| 0.003175057 | 5.39257E-06 |
| 0.004921546 | 9.61483E-06 |
| 0.00097008  | 1.34522E-06 |
| 0.008172975 | 1.90416E-05 |
| 0.008172975 | 1.90416E-05 |
| 0.00016351  | 1.1884E-07  |

|             |             |
|-------------|-------------|
| 3.88087E-07 | 9.04313E-11 |
| 0.009394716 | 3.35379E-05 |
| 0.000703795 | 7.39602E-07 |
| 0.002888808 | 6.01456E-06 |
| 0.005375249 | 1.0919E-05  |
| 0.009393644 | 3.35279E-05 |
| 0.001339648 | 6.08278E-06 |
| 0.008765817 | 3.02281E-05 |
| 0.009452001 | 3.40217E-05 |
| 7.80087E-07 | 4.80555E-10 |
| 2.85207E-07 | 1.42526E-10 |
| 0.006403301 | 1.37164E-05 |
| 0.001933999 | 2.83514E-06 |
| 6.22335E-07 | 1.52888E-10 |
| 0.00495282  | 1.30818E-05 |
| 0.008505711 | 2.01037E-05 |
| 0.000606269 | 5.98434E-07 |
| 0.001970548 | 2.90606E-06 |
| 0.001211669 | 5.29462E-06 |
| 0.00286027  | 4.70062E-06 |
| 0.007896428 | 1.80741E-05 |
| 1.72831E-07 | 3.48546E-11 |
| 0.000997629 | 1.40074E-06 |
| 3.93888E-06 | 1.28829E-09 |
| 0.006270513 | 1.33244E-05 |
| 3.95209E-06 | 3.52243E-09 |
| 0.000534009 | 5.09877E-07 |
| 0.000283879 | 7.6006E-07  |
| 6.41886E-05 | 3.77185E-08 |
| 4.68247E-13 | 3.03809E-17 |
| 0.000534009 | 5.09877E-07 |
| 9.72954E-05 | 6.20037E-08 |
| 0.006761117 | 2.07314E-05 |
| 0.001058832 | 1.25558E-06 |
| 6.64903E-17 | 1.4628E-21  |
| 5.906E-10   | 5.71707E-14 |
| 3.62009E-23 | 3.56536E-28 |
| 0.001746216 | 3.03147E-06 |
| 0.009486365 | 2.32405E-05 |
| 0.003645592 | 6.44839E-06 |
| 2.45968E-10 | 2.18258E-14 |
| 0.000753828 | 8.05448E-07 |
| 2.14973E-05 | 9.48292E-09 |
| 0.001061922 | 1.54507E-06 |
| 1.85987E-10 | 1.58215E-14 |
| 0.006971016 | 1.53878E-05 |

|             |             |
|-------------|-------------|
| 0.008526819 | 2.01911E-05 |
| 0.000188727 | 1.41628E-07 |
| 0.007936784 | 1.82388E-05 |
| 0.001981703 | 3.62823E-06 |
| 0.000326905 | 9.13278E-07 |
| 0.004711596 | 8.98773E-06 |
| 0.004711596 | 8.98773E-06 |
| 0.001191793 | 5.17994E-06 |
| 3.98238E-17 | 8.89886E-22 |
| 0.000147771 | 1.03815E-07 |
| 0.008508216 | 2.89711E-05 |
| 6.83992E-09 | 1.13174E-12 |
| 1.90117E-05 | 2.42055E-08 |
| 0.00256575  | 4.09053E-06 |
| 0.001563456 | 2.0913E-06  |
| 0.005934657 | 1.24253E-05 |
| 7.19661E-05 | 4.29594E-08 |
| 3.24729E-11 | 4.2713E-15  |
| 0.001933999 | 2.83514E-06 |
| 0.001418149 | 1.84286E-06 |
| 8.16954E-06 | 8.65883E-09 |
| 0.000163436 | 1.18536E-07 |
| 0.00397489  | 7.20284E-06 |
| 0.001889972 | 3.39864E-06 |
| 0.001038557 | 1.48792E-06 |
| 0.007715694 | 2.5087E-05  |
| 1.52905E-09 | 3.29251E-13 |
| 0.00375979  | 8.72909E-06 |
| 2.00018E-06 | 6.93419E-10 |
| 0.001964261 | 3.58034E-06 |
| 9.65375E-05 | 6.13792E-08 |
| 5.96063E-08 | 1.24846E-11 |
| 4.40126E-05 | 2.31098E-08 |
| 0.005497455 | 4.39949E-05 |
| 4.50083E-07 | 1.05951E-10 |
| 2.58813E-05 | 1.19193E-08 |
| 0.001281217 | 5.70964E-06 |
| 0.004165018 | 7.64816E-06 |
| 0.002261396 | 1.25228E-05 |
| 5.92326E-06 | 2.06763E-09 |
| 0.003404756 | 5.88812E-06 |
| 0.001904087 | 2.69215E-06 |
| 0.000137185 | 9.3863E-08  |
| 0.000277356 | 2.24346E-07 |
| 4.31948E-05 | 2.2427E-08  |
| 0.004971065 | 1.31504E-05 |

|             |             |
|-------------|-------------|
| 0.001323216 | 1.69135E-06 |
| 0.00443975  | 3.24503E-05 |
| 3.79056E-05 | 1.90528E-08 |
| 8.40893E-10 | 1.69539E-13 |
| 0.000475611 | 1.50939E-06 |
| 0.005586621 | 1.55711E-05 |
| 0.001933999 | 2.83514E-06 |
| 1.88168E-05 | 8.11773E-09 |
| 0.002184277 | 4.13792E-06 |
| 0.002184277 | 4.13792E-06 |
| 0.001753712 | 2.42167E-06 |
| 0.001735936 | 2.38899E-06 |
| 0.005925316 | 1.23804E-05 |
| 0.000740742 | 7.89836E-07 |
| 0.000796198 | 8.74075E-07 |
| 0.001825936 | 9.28534E-06 |
| 0.00837369  | 1.96873E-05 |
| 0.003908976 | 9.21406E-06 |
| 0.007949013 | 1.82925E-05 |
| 8.32659E-06 | 3.07143E-09 |
| 0.006269008 | 1.85891E-05 |
| 0.0089048   | 2.13605E-05 |
| 1.56799E-16 | 3.90193E-21 |
| 5.56897E-06 | 2.28167E-09 |
| 0.001749681 | 2.41225E-06 |
| 0.005008332 | 9.82772E-06 |
| 0.003910739 | 7.04931E-06 |
| 0.001574405 | 2.11518E-06 |
| 0.000703795 | 7.39602E-07 |
| 0.004998225 | 3.83776E-05 |
| 0.000788803 | 1.02441E-06 |
| 0.005220646 | 1.40632E-05 |
| 0.00235172  | 4.57212E-06 |
| 7.1236E-12  | 7.2355E-16  |
| 0.003456358 | 6.01228E-06 |
| 0.000812662 | 3.09123E-06 |
| 0.003865571 | 6.94645E-06 |
| 9.19326E-05 | 5.75246E-08 |
| 0.002979043 | 4.94387E-06 |
| 0.000254749 | 2.03258E-07 |
| 1.99309E-05 | 8.72584E-09 |
| 0.000107792 | 7.01159E-08 |
| 0.001687678 | 2.31143E-06 |
| 0.008968817 | 2.15798E-05 |
| 0.000531226 | 5.03324E-07 |
| 0.000181199 | 1.34475E-07 |

|             |             |
|-------------|-------------|
| 4.77422E-10 | 4.48144E-14 |
| 4.77422E-10 | 4.48144E-14 |
| 0.007202482 | 2.26191E-05 |
| 4.93591E-05 | 8.03155E-08 |
| 0.005579319 | 1.14563E-05 |
| 0.000389249 | 3.44255E-07 |
| 8.03719E-11 | 8.17955E-15 |
| 4.70906E-06 | 1.58163E-09 |
| 0.00193327  | 1.00666E-05 |
| 0.007621244 | 2.46298E-05 |
| 5.94932E-05 | 3.4205E-08  |
| 0.003062832 | 5.13743E-06 |
| 0.003229123 | 2.07941E-05 |
| 9.291E-06   | 3.49531E-09 |
| 0.00922614  | 3.26151E-05 |
| 3.0888E-09  | 7.26291E-13 |
| 1.65597E-07 | 3.32744E-11 |
| 0.002195562 | 3.36519E-06 |
| 0.000150272 | 1.06221E-07 |
| 8.92381E-05 | 5.5233E-08  |
| 0.002153108 | 3.27161E-06 |
| 0.001442614 | 1.88523E-06 |
| 0.004921546 | 9.61483E-06 |
| 4.56951E-05 | 2.41273E-08 |
| 0.000760638 | 8.14956E-07 |
| 0.008749987 | 3.01448E-05 |
| 2.22958E-06 | 6.49987E-10 |
| 0.000293193 | 2.85437E-07 |
| 0.002175488 | 4.10522E-06 |
| 0.009242621 | 3.27037E-05 |
| 0.009048705 | 3.17324E-05 |
| 0.000417278 | 1.2662E-06  |
| 0.002877843 | 1.7588E-05  |
| 2.19395E-05 | 9.75002E-09 |
| 4.29864E-05 | 2.62769E-08 |
| 9.0706E-06  | 3.38578E-09 |
| 0.000427669 | 3.84506E-07 |
| 0.008839918 | 8.7868E-05  |
| 0.005062639 | 9.97215E-06 |
| 0.000128408 | 8.68221E-08 |
| 0.000175386 | 1.2943E-07  |
| 0.003675254 | 6.51198E-06 |
| 0.000229292 | 1.78238E-07 |
| 0.000211198 | 5.12883E-07 |
| 0.000211198 | 5.12883E-07 |
| 0.00815181  | 7.81495E-05 |

|             |             |
|-------------|-------------|
| 5.63119E-06 | 1.94654E-09 |
| 1.76371E-09 | 3.8605E-13  |
| 9.19326E-05 | 5.75246E-08 |
| 0.007012912 | 1.55164E-05 |
| 0.000299513 | 2.45156E-07 |
| 0.000229292 | 1.78103E-07 |
| 0.000534009 | 5.09877E-07 |
| 0.005183954 | 1.03252E-05 |
| 7.96564E-06 | 2.91492E-09 |
| 0.00016351  | 1.1884E-07  |
| 0.001749899 | 8.76315E-06 |
| 0.001749899 | 8.76315E-06 |
| 0.000403274 | 4.27893E-07 |
| 0.000499771 | 4.67291E-07 |
| 0.001485491 | 1.96087E-06 |
| 6.21853E-10 | 6.20201E-14 |
| 0.002902342 | 6.05423E-06 |
| 0.00023892  | 1.86949E-07 |
| 3.16655E-05 | 1.50593E-08 |
| 3.16655E-05 | 1.50593E-08 |
| 0.003489905 | 7.89856E-06 |
| 0.005353107 | 1.07557E-05 |
| 0.001539522 | 2.55235E-06 |
| 0.000191812 | 1.66495E-07 |
| 0.000152866 | 1.09054E-07 |
| 0.00327541  | 5.60865E-06 |
| 1.104E-05   | 4.27989E-09 |
| 0.000534009 | 5.09877E-07 |
| 8.96769E-05 | 5.56361E-08 |
| 0.005146361 | 1.02201E-05 |
| 0.000244843 | 2.28763E-07 |
| 0.00806387  | 2.67181E-05 |
| 1.88945E-07 | 8.77044E-11 |
| 0.009714209 | 2.39574E-05 |
| 0.006029944 | 1.26867E-05 |
| 0.008180794 | 1.90667E-05 |
| 1.01808E-10 | 1.5594E-14  |
| 0.005600423 | 1.5639E-05  |
| 0.008002959 | 1.84582E-05 |
| 0.00170456  | 2.33629E-06 |
| 1.43495E-12 | 7.57662E-17 |
| 0.006311455 | 1.34549E-05 |
| 0.0016582   | 2.25451E-06 |
| 0.008552    | 2.02696E-05 |
| 0.002492172 | 3.93485E-06 |
| 0.008552    | 2.03E-05    |

|             |             |
|-------------|-------------|
| 0.002492172 | 3.93485E-06 |
| 3.94723E-05 | 1.99732E-08 |
| 2.29387E-06 | 6.78122E-10 |
| 0.000292927 | 2.38445E-07 |
| 5.80763E-06 | 5.62456E-09 |
| 0.007299149 | 1.6358E-05  |
| 0.002195562 | 3.36519E-06 |
| 0.000796198 | 8.74075E-07 |
| 0.008596793 | 2.0401E-05  |
| 6.0627E-06  | 5.94549E-09 |
| 0.001806186 | 2.51532E-06 |
| 0.005164617 | 1.02677E-05 |
| 0.000120058 | 8.03835E-08 |
| 3.74018E-05 | 2.21755E-08 |
| 0.005173153 | 1.02923E-05 |
| 5.74583E-05 | 3.25294E-08 |
| 0.000664113 | 6.7405E-07  |
| 0.0004227   | 4.535E-07   |
| 0.000146403 | 3.17082E-07 |
| 0.000837685 | 9.39278E-07 |
| 0.002396616 | 1.36376E-05 |
| 0.003077442 | 5.17793E-06 |
| 5.0455E-07  | 2.82887E-10 |
| 0.000175386 | 1.2943E-07  |
| 0.004905666 | 9.51905E-06 |
| 0.002806743 | 1.69439E-05 |
| 4.2808E-11  | 4.04744E-15 |
| 0.000776284 | 8.3912E-07  |
| 0.001920592 | 2.72598E-06 |
| 0.003801734 | 8.86282E-06 |
| 0.001240448 | 1.54644E-06 |
| 0.00640756  | 1.92434E-05 |
| 2.23026E-05 | 9.92772E-09 |
| 0.000227945 | 1.76856E-07 |
| 0.002358053 | 4.58753E-06 |
| 0.002774689 | 4.51724E-06 |
| 0.000150272 | 1.06221E-07 |
| 0.001078742 | 1.28235E-06 |
| 0.005960506 | 1.24838E-05 |
| 1.35949E-07 | 2.68185E-11 |
| 0.002262668 | 3.49782E-06 |
| 0.000631468 | 7.59989E-07 |
| 0.001056985 | 1.25184E-06 |
| 2.55045E-06 | 9.07631E-10 |
| 0.000356554 | 3.05926E-07 |
| 1.79916E-05 | 7.62613E-09 |



|             |             |
|-------------|-------------|
| 1.80662E-05 | 7.75047E-09 |
| 0.005353107 | 1.08251E-05 |
| 0.000534009 | 5.09877E-07 |
| 2.76356E-05 | 1.28935E-08 |
| 1.93306E-08 | 3.56651E-12 |
| 1.93306E-08 | 3.56651E-12 |
| 1.93306E-08 | 3.56651E-12 |
| 0.001996483 | 3.66388E-06 |
| 0.004382042 | 8.1463E-06  |
| 4.8246E-08  | 8.06682E-12 |
| 0.00026533  | 2.54176E-07 |
| 0.00026533  | 2.54176E-07 |
| 0.000175386 | 1.2943E-07  |
| 0.000222538 | 5.50844E-07 |
| 6.15235E-07 | 1.49791E-10 |
| 0.000954694 | 1.09988E-06 |
| 5.77753E-08 | 9.95672E-12 |
| 5.22867E-05 | 3.37815E-08 |
| 2.36225E-05 | 3.19594E-08 |
| 0.002364131 | 4.6009E-06  |
| 0.007569984 | 2.44045E-05 |
| 0.001012355 | 1.43479E-06 |
| 7.77969E-06 | 2.81835E-09 |
| 0.001214375 | 1.86021E-06 |
| 0.006637634 | 1.44228E-05 |
| 0.003828761 | 6.86223E-06 |
| 0.000703795 | 7.39602E-07 |
| 0.003850561 | 2.66239E-05 |
| 0.005131118 | 1.01758E-05 |
| 0.006329252 | 1.35068E-05 |
| 2.24554E-11 | 2.77119E-15 |
| 0.003804626 | 6.81339E-06 |
| 0.002273185 | 4.36869E-06 |
| 0.000340295 | 2.87235E-07 |
| 0.009132855 | 2.20549E-05 |
| 0.008172975 | 1.90416E-05 |
| 7.78441E-12 | 8.18344E-16 |
| 2.29387E-06 | 6.75522E-10 |
| 2.62633E-05 | 1.21723E-08 |
| 0.000429508 | 3.8679E-07  |
| 0.009039179 | 3.16585E-05 |
| 0.005353107 | 1.08145E-05 |
| 0.000343098 | 2.90355E-07 |
| 3.01183E-05 | 1.69259E-08 |
| 0.001882497 | 9.69324E-06 |
| 0.009468768 | 2.31716E-05 |

|             |             |
|-------------|-------------|
| 0.004921546 | 9.61483E-06 |
| 7.79233E-06 | 2.82864E-09 |
| 0.003350142 | 7.42607E-06 |
| 0.001240448 | 1.54644E-06 |
| 0.003645592 | 6.44839E-06 |
| 1.81726E-22 | 1.38435E-27 |
| 0.000775974 | 8.38216E-07 |
| 1.33016E-07 | 5.70146E-11 |
| 0.000975518 | 3.95416E-06 |
| 0.001025477 | 1.46446E-06 |
| 2.49223E-05 | 1.13863E-08 |
| 0.007970342 | 1.83649E-05 |
| 0.001440019 | 1.88078E-06 |
| 3.08821E-05 | 1.46074E-08 |
| 7.14707E-05 | 4.26113E-08 |
| 1.65617E-05 | 6.87651E-09 |
| 5.62741E-05 | 3.18177E-08 |
| 0.00195593  | 2.8759E-06  |
| 0.000312342 | 2.59288E-07 |
| 0.007550987 | 2.42986E-05 |
| 0.00244009  | 3.84009E-06 |
| 0.005353107 | 1.08251E-05 |
| 0.002995099 | 1.8659E-05  |
| 0.000664113 | 6.74524E-07 |
| 0.008730732 | 2.08206E-05 |
| 4.92288E-05 | 8.00534E-08 |
| 0.001540706 | 2.55634E-06 |
| 0.000406021 | 1.2193E-06  |
| 0.000785474 | 8.51358E-07 |
| 0.00077132  | 8.32057E-07 |
| 3.67747E-07 | 9.89981E-11 |
| 3.64162E-05 | 5.48608E-08 |
| 0.000406439 | 3.61843E-07 |
| 7.62582E-06 | 7.98185E-09 |
| 0.005353107 | 1.08251E-05 |
| 0.00569383  | 1.59971E-05 |
| 0.000903423 | 1.02558E-06 |
| 2.20084E-06 | 6.35903E-10 |
| 4.67186E-06 | 4.30172E-09 |
| 2.20084E-06 | 6.35903E-10 |
| 0.001346231 | 2.14085E-06 |
| 0.000566467 | 5.49176E-07 |
| 0.000566467 | 5.49176E-07 |
| 0.001891161 | 3.40354E-06 |
| 0.001006889 | 1.42073E-06 |
| 0.000325828 | 2.72634E-07 |

|             |             |
|-------------|-------------|
| 0.004203443 | 1.02669E-05 |
| 1.2525E-06  | 8.48539E-10 |
| 0.003705057 | 6.58346E-06 |
| 6.76189E-07 | 4.03022E-10 |
| 0.001967253 | 1.03248E-05 |
| 0.006728148 | 5.90102E-05 |
| 1.61342E-06 | 4.50794E-10 |
| 0.00412992  | 7.55645E-06 |
| 0.00981805  | 0.000102136 |
| 0.001314704 | 1.67179E-06 |
| 0.000464513 | 4.2683E-07  |
| 0.002126331 | 3.21845E-06 |
| 0.000375798 | 3.27398E-07 |
| 0.000116803 | 7.78614E-08 |
| 0.000116803 | 7.78614E-08 |
| 2.16506E-05 | 9.60573E-09 |
| 0.000115391 | 7.66995E-08 |
| 0.001933999 | 2.78943E-06 |
| 5.87593E-05 | 3.36107E-08 |
| 7.34145E-07 | 4.46288E-10 |
| 4.23642E-13 | 2.86147E-17 |
| 0.004244872 | 7.82335E-06 |
| 4.0229E-07  | 2.14112E-10 |
| 0.008698249 | 2.06864E-05 |
| 6.53124E-05 | 4.44135E-08 |
| 0.002318693 | 4.49351E-06 |
| 2.39209E-05 | 1.0806E-08  |
| 0.006107997 | 1.78304E-05 |
| 0.002110574 | 3.93805E-06 |
| 0.008827127 | 2.11353E-05 |
| 0.003546663 | 6.23179E-06 |
| 0.004647382 | 1.18792E-05 |
| 0.001476412 | 2.40507E-06 |
| 0.002618347 | 4.19359E-06 |
| 0.000335445 | 3.40065E-07 |
| 0.00218781  | 3.34038E-06 |
| 1.90119E-05 | 9.74922E-09 |
| 0.007453707 | 2.38277E-05 |
| 0.004156391 | 1.00756E-05 |
| 0.005771093 | 1.1973E-05  |
| 0.000398413 | 4.21849E-07 |
| 0.005465089 | 4.36387E-05 |
| 0.000796198 | 8.74075E-07 |
| 3.56531E-05 | 1.75962E-08 |
| 0.00139578  | 1.79811E-06 |

|             |             |
|-------------|-------------|
| 0.001285613 | 5.73838E-06 |
| 7.49529E-05 | 4.51821E-08 |
| 1.80691E-11 | 1.28533E-15 |
| 0.004387699 | 8.16793E-06 |
| 1.04662E-06 | 2.7272E-10  |
| 0.001933999 | 2.83514E-06 |
| 0.003518567 | 2.34623E-05 |
| 0.003518567 | 2.34623E-05 |
| 0.001933999 | 2.83514E-06 |
| 0.002134094 | 3.99348E-06 |
| 0.000235817 | 2.18162E-07 |
| 0.002134094 | 3.99348E-06 |
| 0.002461367 | 3.88079E-06 |
| 1.15987E-09 | 1.26737E-13 |
| 0.001098386 | 1.31234E-06 |
| 9.99893E-05 | 1.94386E-07 |
| 0.001113299 | 1.64909E-06 |
| 0.005071096 | 9.99996E-06 |
| 1.56763E-05 | 1.90354E-08 |
| 5.10723E-06 | 4.79322E-09 |
| 1.88869E-06 | 6.46087E-10 |
| 0.008483108 | 2.88744E-05 |
| 0.008645    | 2.96312E-05 |
| 0.000636143 | 7.67704E-07 |
| 0.002365643 | 3.68476E-06 |
| 0.00432082  | 8.01981E-06 |
| 0.001484791 | 1.95779E-06 |
| 0.007765513 | 1.76766E-05 |
| 0.000115391 | 7.66995E-08 |
| 0.001724632 | 2.36878E-06 |
| 0.005009981 | 9.83903E-06 |
| 0.000828999 | 3.16853E-06 |
| 0.008725044 | 2.07821E-05 |
| 3.29155E-10 | 5.83399E-14 |
| 2.84235E-06 | 8.65029E-10 |
| 0.001933999 | 2.83514E-06 |
| 0.006163469 | 1.30067E-05 |
| 0.000379699 | 3.33581E-07 |
| 0.00302238  | 6.39273E-06 |
| 5.65713E-08 | 2.0542E-11  |
| 7.75005E-12 | 8.10795E-16 |
| 0.000112166 | 8.58726E-08 |
| 0.004353135 | 1.08326E-05 |
| 0.00037888  | 3.324E-07   |
| 2.64502E-06 | 2.14254E-09 |

|             |             |
|-------------|-------------|
| 1.58114E-07 | 3.78928E-11 |
| 0.007118315 | 1.5864E-05  |
| 0.008669534 | 2.05972E-05 |
| 0.001262576 | 1.58699E-06 |
| 0.002726993 | 4.40959E-06 |
| 0.000548542 | 6.28491E-07 |
| 0.007623546 | 1.72863E-05 |
| 0.009452001 | 3.40217E-05 |
| 0.000294575 | 7.96627E-07 |
| 4.89083E-13 | 3.42768E-17 |
| 0.000531226 | 5.03324E-07 |
| 0.001377202 | 1.76844E-06 |
| 1.67271E-13 | 6.86935E-18 |
| 6.66504E-07 | 3.93999E-10 |
| 0.00716723  | 1.59888E-05 |
| 0.0002397   | 1.87884E-07 |
| 1.15653E-08 | 3.33615E-12 |
| 0.00067357  | 8.25254E-07 |
| 0.003539697 | 2.36607E-05 |
| 0.007474952 | 2.39165E-05 |
| 0.009452001 | 3.40217E-05 |
| 0.000703795 | 7.39602E-07 |
| 0.00795685  | 1.83222E-05 |
| 0.000788107 | 8.55946E-07 |
| 0.000603677 | 5.94415E-07 |
| 9.55087E-07 | 2.92228E-10 |
| 9.55087E-07 | 2.92228E-10 |
| 0.004902405 | 9.50562E-06 |
| 0.000813972 | 9.03138E-07 |
| 0.002856708 | 4.69267E-06 |
| 4.18656E-05 | 2.15109E-08 |
| 0.000102596 | 6.59081E-08 |
| 0.001904087 | 2.69215E-06 |
| 0.001643595 | 2.22863E-06 |
| 0.000137899 | 9.47969E-08 |
| 0.002513721 | 3.97809E-06 |
| 0.007874286 | 2.57929E-05 |
| 2.50298E-08 | 3.74449E-12 |
| 0.005907747 | 1.2333E-05  |
| 2.34667E-06 | 1.84009E-09 |
| 0.000105925 | 6.86686E-08 |
| 0.000105925 | 6.86686E-08 |
| 0.009832971 | 2.43585E-05 |
| 0.004711596 | 8.99044E-06 |
| 2.30754E-12 | 1.89847E-16 |
| 0.001212179 | 5.29952E-06 |

|             |             |
|-------------|-------------|
| 0.001502121 | 2.46865E-06 |
| 0.002659973 | 5.36877E-06 |
| 2.29387E-06 | 6.77352E-10 |
| 0.003900102 | 9.18033E-06 |
| 0.003900102 | 9.18033E-06 |
| 0.001244221 | 1.55571E-06 |
| 0.000534009 | 5.09877E-07 |
| 0.002239137 | 4.27826E-06 |
| 0.008806789 | 2.10672E-05 |
| 0.008806789 | 2.10672E-05 |
| 0.001904087 | 2.69215E-06 |
| 0.000407564 | 3.63144E-07 |
| 2.70399E-07 | 6.88859E-11 |
| 0.009899206 | 3.66128E-05 |
| 3.16655E-05 | 1.50702E-08 |
| 0.007693472 | 1.74787E-05 |
| 0.000839799 | 1.10446E-06 |
| 0.000703795 | 7.39602E-07 |
| 0.000244744 | 1.9366E-07  |
| 0.006489924 | 1.39829E-05 |
| 1.15987E-09 | 1.26737E-13 |
| 0.004194739 | 1.02292E-05 |
| 0.009395572 | 2.29579E-05 |
| 0.000441067 | 4.01728E-07 |
| 0.001959434 | 2.88392E-06 |
| 0.001369449 | 1.75748E-06 |
| 5.68891E-07 | 1.36839E-10 |
| 0.00338527  | 5.83931E-06 |
| 2.47622E-10 | 2.21541E-14 |
| 0.006226358 | 1.31913E-05 |
| 0.005138627 | 1.0201E-05  |
| 0.000235514 | 2.17264E-07 |
| 0.000235514 | 2.17264E-07 |
| 9.88171E-05 | 7.38359E-08 |
| 0.005836783 | 1.21562E-05 |
| 0.005748875 | 1.6271E-05  |
| 2.03437E-05 | 1.05524E-08 |
| 0.003051174 | 1.9168E-05  |
| 0.000464062 | 4.25735E-07 |
| 0.000676813 | 8.329E-07   |
| 0.000150717 | 1.06659E-07 |
| 0.006563689 | 5.69406E-05 |
| 0.009369875 | 3.33939E-05 |
| 0.00014754  | 1.03544E-07 |
| 3.82949E-08 | 1.30791E-11 |
| 0.009895324 | 2.45492E-05 |

|             |             |
|-------------|-------------|
| 0.009895324 | 2.45492E-05 |
| 0.001249711 | 1.56624E-06 |
| 0.006619382 | 1.43394E-05 |
| 6.03721E-06 | 2.12069E-09 |
| 1.81726E-22 | 1.33179E-27 |
| 0.009312357 | 2.26932E-05 |
| 0.001574215 | 2.11146E-06 |
| 5.45404E-07 | 1.30389E-10 |
| 0.00197301  | 2.91114E-06 |
| 0.000181307 | 1.5571E-07  |
| 0.003545459 | 6.21927E-06 |
| 0.005228525 | 1.04484E-05 |
| 0.002174657 | 3.31392E-06 |
| 0.000709141 | 7.4782E-07  |
| 5.69784E-13 | 4.19582E-17 |
| 0.000534009 | 5.09877E-07 |
| 0.009900233 | 0.000103454 |
| 0.000425857 | 4.58862E-07 |
| 0.000586613 | 5.72673E-07 |
| 5.35014E-05 | 2.98129E-08 |
| 0.001191793 | 5.18155E-06 |
| 8.63345E-08 | 1.57648E-11 |
| 0.002461972 | 1.41456E-05 |
| 0.000297151 | 2.89927E-07 |
| 0.000297151 | 2.89927E-07 |
| 0.000168355 | 1.41933E-07 |
| 4.2188E-06  | 1.62875E-09 |
| 0.009328889 | 3.31866E-05 |
| 0.000144717 | 1.16209E-07 |
| 0.009333353 | 3.32147E-05 |
| 0.000643951 | 2.25522E-06 |
| 0.000709141 | 7.4782E-07  |
| 0.001304542 | 1.65313E-06 |
| 0.001240448 | 1.54644E-06 |
| 0.003461927 | 7.7966E-06  |
| 0.000310043 | 2.5647E-07  |
| 0.00545066  | 1.50053E-05 |
| 0.001927119 | 2.74309E-06 |
| 8.79837E-06 | 3.26481E-09 |
| 2.23019E-14 | 1.01038E-18 |
| 0.006629474 | 1.43753E-05 |
| 0.006801176 | 1.4878E-05  |
| 0.005353107 | 1.07817E-05 |
| 2.46415E-09 | 2.85516E-13 |
| 0.003245971 | 7.09286E-06 |

|             |             |
|-------------|-------------|
| 0.003245971 | 7.09286E-06 |
| 0.00674261  | 1.47182E-05 |
| 0.004202254 | 1.02613E-05 |
| 0.000356554 | 3.05926E-07 |
| 0.005936358 | 1.70448E-05 |
| 0.006458536 | 1.38654E-05 |
| 0.001933999 | 2.83514E-06 |
| 0.002840594 | 5.86574E-06 |
| 4.20E-05    | 2.55E-08    |
| 2.51011E-10 | 4.29598E-14 |
| 0.006819163 | 6.02096E-05 |
| 0.000403557 | 4.29E-07    |
| 0.009670462 | 3.53E-05    |

---



**Supplemental Table 9: List of 1346 unique hypo-methylated gen  
METHYLATED REGION**

---

mytileDiff25p200.hypo\_CpG.Chr01.517401-517600  
mytileDiff25p200.hypo\_merged\_CHG.Chr01.668801-669000  
mytileDiff25p200.hypo\_CpG.Chr01.740801-741000  
mytileDiff25p200.hypo\_CpG.Chr01.740201-740400  
mytileDiff25p200.hypo\_CpG.Chr01.2190001-2190200  
mytileDiff25p200.hypo\_merged\_CHG.Chr01.2190001-2190200  
mytileDiff25p200.hypo\_CpG.Chr01.2189801-2190000  
mytileDiff25p200.hypo\_merged\_CHH.Chr01.2214801-2215000  
mytileDiff25p200.hypo\_CpG.Chr01.2399801-2400000  
mytileDiff25p200.hypo\_CpG.Chr01.2409601-2409800  
mytileDiff25p200.hypo\_CpG.Chr01.4046201-4046400  
mytileDiff25p200.hypo\_CpG.Chr01.4046201-4046400  
mytileDiff25p200.hypo\_merged\_CHH.Chr01.4130001-4130200  
mytileDiff25p200.hypo\_CpG.Chr01.4158401-4158600  
mytileDiff25p200.hypo\_CpG.Chr01.4828401-4828600  
mytileDiff25p200.hypo\_CpG.Chr01.7809001-7809200  
mytileDiff25p200.hypo\_CpG.Chr01.9100201-9100400  
mytileDiff25p200.hypo\_CpG.Chr01.10100801-10101000  
mytileDiff25p200.hypo\_merged\_CHG.Chr01.15362801-15363000  
mytileDiff25p200.hypo\_merged\_CHG.Chr01.15362201-15362400  
mytileDiff25p200.hypo\_CpG.Chr01.15368201-15368400  
mytileDiff25p200.hypo\_CpG.Chr01.15368201-15368400  
mytileDiff25p200.hypo\_merged\_CHG.Chr01.16544001-16544200  
mytileDiff25p200.hypo\_merged\_CHH.Chr01.17777401-17777600  
mytileDiff25p200.hypo\_merged\_CHG.Chr01.26997001-26997200  
mytileDiff25p200.hypo\_CpG.Chr01.26997001-26997200  
mytileDiff25p200.hypo\_merged\_CHG.Chr01.26996801-26997000  
mytileDiff25p200.hypo\_CpG.Chr01.26996801-26997000  
mytileDiff25p200.hypo\_CpG.Chr01.26986201-26986400  
mytileDiff25p200.hypo\_merged\_CHH.Chr01.27108801-27109000  
mytileDiff25p200.hypo\_merged\_CHG.Chr01.28298001-28298200  
mytileDiff25p200.hypo\_CpG.Chr01.28636401-28636600  
mytileDiff25p200.hypo\_CpG.Chr01.29534201-29534400  
mytileDiff25p200.hypo\_merged\_CHG.Chr01.33985201-33985400  
mytileDiff25p200.hypo\_merged\_CHG.Chr01.34325801-34326000  
mytileDiff25p200.hypo\_CpG.Chr01.39603601-39603800  
mytileDiff25p200.hypo\_CpG.Chr01.39603801-39604000  
mytileDiff25p200.hypo\_merged\_CHG.Chr01.39603801-39604000  
mytileDiff25p200.hypo\_merged\_CHG.Chr01.40579801-40580000  
mytileDiff25p200.hypo\_merged\_CHG.Chr01.40582201-40582400  
mytileDiff25p200.hypo\_CpG.Chr01.40582001-40582200  
mytileDiff25p200.hypo\_merged\_CHG.Chr01.41290201-41290400

mytileDiff25p20.hypo\_merged\_CHG.Chr01.41290001-41290200  
mytileDiff25p20.hypo\_merged\_CHG.Chr01.41289801-41290000  
mytileDiff25p20.hypo\_CpG.Chr01.41290201-41290400  
mytileDiff25p20.hypo\_merged\_CHH.Chr01.45569801-45570000  
mytileDiff25p20.hypo\_CpG.Chr01.45569801-45570000  
mytileDiff25p20.hypo\_merged\_CHH.Chr01.45752201-45752400  
mytileDiff25p20.hypo\_CpG.Chr01.45835401-45835600  
mytileDiff25p20.hypo\_CpG.Chr01.46828601-46828800  
mytileDiff25p20.hypo\_CpG.Chr01.47411401-47411600  
mytileDiff25p20.hypo\_merged\_CHG.Chr01.48062001-48062200  
mytileDiff25p20.hypo\_CpG.Chr01.48068801-48069000  
mytileDiff25p20.hypo\_CpG.Chr01.48068601-48068800  
mytileDiff25p20.hypo\_CpG.Chr01.48068601-48068800  
mytileDiff25p20.hypo\_merged\_CHG.Chr01.48068801-48069000  
mytileDiff25p20.hypo\_CpG.Chr01.48068801-48069000  
mytileDiff25p20.hypo\_merged\_CHG.Chr01.48068801-48069000  
mytileDiff25p20.hypo\_CpG.Chr01.48068601-48068800  
mytileDiff25p20.hypo\_CpG.Chr01.48068801-48069000  
mytileDiff25p20.hypo\_merged\_CHH.Chr01.49102001-49102200  
mytileDiff25p20.hypo\_merged\_CHG.Chr01.49102001-49102200  
mytileDiff25p20.hypo\_CpG.Chr01.49437801-49438000  
mytileDiff25p20.hypo\_merged\_CHH.Chr01.49437001-49437200  
mytileDiff25p20.hypo\_CpG.Chr01.50031601-50031800  
mytileDiff25p20.hypo\_CpG.Chr01.50370801-50371000  
mytileDiff25p20.hypo\_merged\_CHH.Chr01.50436601-50436800  
mytileDiff25p20.hypo\_merged\_CHH.Chr01.50606401-50606600  
mytileDiff25p20.hypo\_merged\_CHH.Chr01.50606201-50606400  
mytileDiff25p20.hypo\_CpG.Chr01.50645001-50645200  
mytileDiff25p20.hypo\_CpG.Chr01.51294201-51294400  
mytileDiff25p20.hypo\_merged\_CHH.Chr01.51982201-51982400  
mytileDiff25p20.hypo\_merged\_CHH.Chr01.52517201-52517400  
mytileDiff25p20.hypo\_merged\_CHH.Chr01.53463601-53463800  
mytileDiff25p20.hypo\_merged\_CHG.Chr01.53574201-53574400  
mytileDiff25p20.hypo\_CpG.Chr01.53754001-53754200  
mytileDiff25p20.hypo\_CpG.Chr01.54094201-54094400  
mytileDiff25p20.hypo\_CpG.Chr01.55465801-55466000  
mytileDiff25p20.hypo\_CpG.Chr01.55519601-55519800  
mytileDiff25p20.hypo\_CpG.Chr01.56047001-56047200  
mytileDiff25p20.hypo\_CpG.Chr01.56119001-56119200  
mytileDiff25p20.hypo\_CpG.Chr01.56264001-56264200  
mytileDiff25p20.hypo\_merged\_CHG.Chr01.56617801-56618000  
mytileDiff25p20.hypo\_CpG.Chr01.56617801-56618000  
mytileDiff25p20.hypo\_merged\_CHH.Chr01.56617801-56618000  
mytileDiff25p20.hypo\_merged\_CHG.Chr01.56739601-56739800

mytileDiff25p200.hypo\_CpG.Chr01.56758201-56758400  
mytileDiff25p200.hypo\_merged\_CHH.Chr02.408001-408200  
mytileDiff25p200.hypo\_CpG.Chr02.697601-697800  
mytileDiff25p200.hypo\_merged\_CHG.Chr02.1125601-1125800  
mytileDiff25p200.hypo\_CpG.Chr02.1941601-1941800  
mytileDiff25p200.hypo\_merged\_CHH.Chr02.2477201-2477400  
mytileDiff25p200.hypo\_CpG.Chr02.3957601-3957800  
mytileDiff25p200.hypo\_CpG.Chr02.4413201-4413400  
mytileDiff25p200.hypo\_CpG.Chr02.5107601-5107800  
mytileDiff25p200.hypo\_CpG.Chr02.5607801-5608000  
mytileDiff25p200.hypo\_CpG.Chr02.5922401-5922600  
mytileDiff25p200.hypo\_CpG.Chr02.5948801-5949000  
mytileDiff25p200.hypo\_CpG.Chr02.7445201-7445400  
mytileDiff25p200.hypo\_CpG.Chr02.7834601-7834800  
mytileDiff25p200.hypo\_merged\_CHH.Chr02.7967001-7967200  
mytileDiff25p200.hypo\_CpG.Chr02.8061801-8062000  
mytileDiff25p200.hypo\_CpG.Chr02.8938201-8938400  
mytileDiff25p200.hypo\_merged\_CHG.Chr02.8965401-8965600  
mytileDiff25p200.hypo\_CpG.Chr02.9268601-9268800  
mytileDiff25p200.hypo\_CpG.Chr02.9442801-9443000  
mytileDiff25p200.hypo\_merged\_CHH.Chr02.9761401-9761600  
mytileDiff25p200.hypo\_CpG.Chr02.9786601-9786800  
mytileDiff25p200.hypo\_CpG.Chr02.9786401-9786600  
mytileDiff25p200.hypo\_CpG.Chr02.10119401-10119600  
mytileDiff25p200.hypo\_merged\_CHG.Chr02.10913201-10913400  
mytileDiff25p200.hypo\_merged\_CHH.Chr02.11374801-11375000  
mytileDiff25p200.hypo\_merged\_CHH.Chr02.11529601-11529800  
mytileDiff25p200.hypo\_merged\_CHG.Chr02.13257601-13257800  
mytileDiff25p200.hypo\_merged\_CHG.Chr02.13257401-13257600  
mytileDiff25p200.hypo\_CpG.Chr02.13257601-13257800  
mytileDiff25p200.hypo\_merged\_CHH.Chr02.14091001-14091200  
mytileDiff25p200.hypo\_merged\_CHG.Chr02.14391201-14391400  
mytileDiff25p200.hypo\_merged\_CHG.Chr02.14391001-14391200  
mytileDiff25p200.hypo\_CpG.Chr02.14391201-14391400  
mytileDiff25p200.hypo\_merged\_CHG.Chr02.14391201-14391400  
mytileDiff25p200.hypo\_merged\_CHG.Chr02.14391001-14391200  
mytileDiff25p200.hypo\_CpG.Chr02.14391001-14391200  
mytileDiff25p200.hypo\_merged\_CHG.Chr02.14563801-14564000  
mytileDiff25p200.hypo\_CpG.Chr02.14637401-14637600  
mytileDiff25p200.hypo\_merged\_CHG.Chr02.14663201-14663400  
mytileDiff25p200.hypo\_CpG.Chr02.14663201-14663400  
mytileDiff25p200.hypo\_CpG.Chr02.15010601-15010800  
mytileDiff25p200.hypo\_merged\_CHH.Chr02.17739001-17739200  
mytileDiff25p200.hypo\_CpG.Chr02.18541601-18541800

mytileDiff25p200.hypo\_CpG.Chr02.19239201-19239400  
mytileDiff25p200.hypo\_CpG.Chr02.21656801-21657000  
mytileDiff25p200.hypo\_merged\_CHG.Chr02.21710401-21710600  
mytileDiff25p200.hypo\_CpG.Chr02.25305201-25305400  
mytileDiff25p200.hypo\_CpG.Chr02.25944401-25944600  
mytileDiff25p200.hypo\_merged\_CHH.Chr02.26357801-26358000  
mytileDiff25p200.hypo\_CpG.Chr02.26609801-26610000  
mytileDiff25p200.hypo\_CpG.Chr02.27396801-27397000  
mytileDiff25p200.hypo\_merged\_CHG.Chr02.29698601-29698800  
mytileDiff25p200.hypo\_merged\_CHG.Chr02.30792401-30792600  
mytileDiff25p200.hypo\_CpG.Chr02.32143801-32144000  
mytileDiff25p200.hypo\_CpG.Chr02.33115201-33115400  
mytileDiff25p200.hypo\_CpG.Chr02.33762401-33762600  
mytileDiff25p200.hypo\_CpG.Chr02.35583001-35583200  
mytileDiff25p200.hypo\_merged\_CHG.Chr02.35801001-35801200  
mytileDiff25p200.hypo\_merged\_CHG.Chr02.36354801-36355000  
mytileDiff25p200.hypo\_CpG.Chr02.37473401-37473600  
mytileDiff25p200.hypo\_CpG.Chr02.38562201-38562400  
mytileDiff25p200.hypo\_CpG.Chr02.38614801-38615000  
mytileDiff25p200.hypo\_CpG.Chr02.38739601-38739800  
mytileDiff25p200.hypo\_CpG.Chr02.40235801-40236000  
mytileDiff25p200.hypo\_CpG.Chr02.40544201-40544400  
mytileDiff25p200.hypo\_CpG.Chr02.40750401-40750600  
mytileDiff25p200.hypo\_CpG.Chr02.40920801-40921000  
mytileDiff25p200.hypo\_merged\_CHH.Chr02.41492801-41493000  
mytileDiff25p200.hypo\_merged\_CHH.Chr02.42108401-42108600  
mytileDiff25p200.hypo\_CpG.Chr02.43892601-43892800  
mytileDiff25p200.hypo\_CpG.Chr02.44398601-44398800  
mytileDiff25p200.hypo\_merged\_CHG.Chr02.44502401-44502600  
mytileDiff25p200.hypo\_CpG.Chr02.45341601-45341800  
mytileDiff25p200.hypo\_CpG.Chr02.45414801-45415000  
mytileDiff25p200.hypo\_CpG.Chr02.45437001-45437200  
mytileDiff25p200.hypo\_merged\_CHH.Chr02.45693601-45693800  
mytileDiff25p200.hypo\_CpG.Chr02.45773801-45774000  
mytileDiff25p200.hypo\_merged\_CHH.Chr02.46045401-46045600  
mytileDiff25p200.hypo\_merged\_CHG.Chr02.46045401-46045600  
mytileDiff25p200.hypo\_CpG.Chr02.46408801-46409000  
mytileDiff25p200.hypo\_merged\_CHG.Chr02.46776201-46776400  
mytileDiff25p200.hypo\_CpG.Chr02.47328001-47328200  
mytileDiff25p200.hypo\_CpG.Chr02.47393601-47393800  
mytileDiff25p200.hypo\_CpG.Chr02.47581601-47581800  
mytileDiff25p200.hypo\_CpG.Chr02.47997601-47997800  
mytileDiff25p200.hypo\_merged\_CHH.Chr02.48172601-48172800  
mytileDiff25p200.hypo\_CpG.Chr02.48528001-48528200

mytileDiff25p200.hypo\_CpG.Chr03.2411001-2411200  
mytileDiff25p200.hypo\_merged\_CHG.Chr03.2994801-2995000  
mytileDiff25p200.hypo\_CpG.Chr03.3030201-3030400  
mytileDiff25p200.hypo\_merged\_CHH.Chr03.3101801-3102000  
mytileDiff25p200.hypo\_merged\_CHH.Chr03.3101601-3101800  
mytileDiff25p200.hypo\_CpG.Chr03.3639801-3640000  
mytileDiff25p200.hypo\_merged\_CHG.Chr03.3984601-3984800  
mytileDiff25p200.hypo\_CpG.Chr03.5575601-5575800  
mytileDiff25p200.hypo\_merged\_CHG.Chr03.6127801-6128000  
mytileDiff25p200.hypo\_merged\_CHG.Chr03.6819801-6820000  
mytileDiff25p200.hypo\_merged\_CHG.Chr03.8213001-8213200  
mytileDiff25p200.hypo\_CpG.Chr03.8308601-8308800  
mytileDiff25p200.hypo\_merged\_CHG.Chr03.9025201-9025400  
mytileDiff25p200.hypo\_merged\_CHH.Chr03.14160601-14160800  
mytileDiff25p200.hypo\_CpG.Chr03.19002001-19002200  
mytileDiff25p200.hypo\_CpG.Chr03.19015201-19015400  
mytileDiff25p200.hypo\_CpG.Chr03.20393201-20393400  
mytileDiff25p200.hypo\_CpG.Chr03.21086601-21086800  
mytileDiff25p200.hypo\_merged\_CHG.Chr03.25259201-25259400  
mytileDiff25p200.hypo\_merged\_CHH.Chr03.25563601-25563800  
mytileDiff25p200.hypo\_CpG.Chr03.27380001-27380200  
mytileDiff25p200.hypo\_merged\_CHG.Chr03.27380001-27380200  
mytileDiff25p200.hypo\_merged\_CHH.Chr03.28480601-28480800  
mytileDiff25p200.hypo\_CpG.Chr03.28937801-28938000  
mytileDiff25p200.hypo\_merged\_CHH.Chr03.29539201-29539400  
mytileDiff25p200.hypo\_merged\_CHG.Chr03.30029401-30029600  
mytileDiff25p200.hypo\_merged\_CHG.Chr03.32115201-32115400  
mytileDiff25p200.hypo\_merged\_CHH.Chr03.32199201-32199400  
mytileDiff25p200.hypo\_CpG.Chr03.32605401-32605600  
mytileDiff25p200.hypo\_merged\_CHH.Chr03.32863001-32863200  
mytileDiff25p200.hypo\_CpG.Chr03.33305201-33305400  
mytileDiff25p200.hypo\_merged\_CHH.Chr03.33421601-33421800  
mytileDiff25p200.hypo\_CpG.Chr03.34174801-34175000  
mytileDiff25p200.hypo\_CpG.Chr03.34692201-34692400  
mytileDiff25p200.hypo\_CpG.Chr03.34778401-34778600  
mytileDiff25p200.hypo\_merged\_CHG.Chr03.34806401-34806600  
mytileDiff25p200.hypo\_CpG.Chr03.35489201-35489400  
mytileDiff25p200.hypo\_CpG.Chr03.35908601-35908800  
mytileDiff25p200.hypo\_CpG.Chr03.36156401-36156600  
mytileDiff25p200.hypo\_merged\_CHH.Chr03.36330001-36330200  
mytileDiff25p200.hypo\_merged\_CHG.Chr03.37433601-37433800  
mytileDiff25p200.hypo\_CpG.Chr03.38755601-38755800  
mytileDiff25p200.hypo\_merged\_CHH.Chr03.39211801-39212000  
mytileDiff25p200.hypo\_CpG.Chr03.39211801-39212000

mytileDiff25p20.hypo\_CpG.Chr03.40054601-40054800  
mytileDiff25p20.hypo\_CpG.Chr03.41397601-41397800  
mytileDiff25p20.hypo\_CpG.Chr03.42603201-42603400  
mytileDiff25p20.hypo\_CpG.Chr03.42801001-42801200  
mytileDiff25p20.hypo\_CpG.Chr03.42801201-42801400  
mytileDiff25p20.hypo\_merged\_CHG.Chr03.42801001-42801200  
mytileDiff25p20.hypo\_merged\_CHG.Chr03.42801001-42801200  
mytileDiff25p20.hypo\_CpG.Chr03.42801001-42801200  
mytileDiff25p20.hypo\_CpG.Chr03.42801201-42801400  
mytileDiff25p20.hypo\_merged\_CHH.Chr03.43346201-43346400  
mytileDiff25p20.hypo\_CpG.Chr03.43555401-43555600  
mytileDiff25p20.hypo\_CpG.Chr03.44408801-44409000  
mytileDiff25p20.hypo\_merged\_CHH.Chr03.44819401-44819600  
mytileDiff25p20.hypo\_CpG.Chr03.45161801-45162000  
mytileDiff25p20.hypo\_CpG.Chr03.45743001-45743200  
mytileDiff25p20.hypo\_merged\_CHH.Chr04.576401-576600  
mytileDiff25p20.hypo\_merged\_CHH.Chr04.576401-576600  
mytileDiff25p20.hypo\_CpG.Chr04.832601-832800  
mytileDiff25p20.hypo\_merged\_CHH.Chr04.879201-879400  
mytileDiff25p20.hypo\_CpG.Chr04.1239801-1240000  
mytileDiff25p20.hypo\_CpG.Chr04.1293601-1293800  
mytileDiff25p20.hypo\_merged\_CHH.Chr04.1426201-1426400  
mytileDiff25p20.hypo\_CpG.Chr04.1995001-1995200  
mytileDiff25p20.hypo\_CpG.Chr04.2047201-2047400  
mytileDiff25p20.hypo\_CpG.Chr04.2310801-2311000  
mytileDiff25p20.hypo\_CpG.Chr04.2788001-2788200  
mytileDiff25p20.hypo\_CpG.Chr04.3193401-3193600  
mytileDiff25p20.hypo\_CpG.Chr04.3192001-3192200  
mytileDiff25p20.hypo\_CpG.Chr04.4361201-4361400  
mytileDiff25p20.hypo\_merged\_CHH.Chr04.5337401-5337600  
mytileDiff25p20.hypo\_CpG.Chr04.5355801-5356000  
mytileDiff25p20.hypo\_merged\_CHH.Chr04.5467001-5467200  
mytileDiff25p20.hypo\_CpG.Chr04.6295601-6295800  
mytileDiff25p20.hypo\_merged\_CHG.Chr04.6703001-6703200  
mytileDiff25p20.hypo\_CpG.Chr04.7579801-7580000  
mytileDiff25p20.hypo\_CpG.Chr04.7963401-7963600  
mytileDiff25p20.hypo\_CpG.Chr04.8114001-8114200  
mytileDiff25p20.hypo\_merged\_CHG.Chr04.8585401-8585600  
mytileDiff25p20.hypo\_merged\_CHG.Chr04.8569001-8569200  
mytileDiff25p20.hypo\_CpG.Chr04.8601401-8601600  
mytileDiff25p20.hypo\_merged\_CHG.Chr04.8787401-8787600  
mytileDiff25p20.hypo\_merged\_CHG.Chr04.8787001-8787200  
mytileDiff25p20.hypo\_merged\_CHG.Chr04.9290201-9290400  
mytileDiff25p20.hypo\_merged\_CHH.Chr04.12759601-12759800

mytileDiff25p200.hypo\_CpG.Chr04.12930401-12930600  
mytileDiff25p200.hypo\_merged\_CHG.Chr04.13085001-13085200  
mytileDiff25p200.hypo\_merged\_CHG.Chr04.13085001-13085200  
mytileDiff25p200.hypo\_merged\_CHG.Chr04.13313801-13314000  
mytileDiff25p200.hypo\_merged\_CHG.Chr04.13313001-13313200  
mytileDiff25p200.hypo\_merged\_CHG.Chr04.13396601-13396800  
mytileDiff25p200.hypo\_merged\_CHG.Chr04.13576401-13576600  
mytileDiff25p200.hypo\_merged\_CHG.Chr04.15256001-15256200  
mytileDiff25p200.hypo\_merged\_CHH.Chr04.15809601-15809800  
mytileDiff25p200.hypo\_merged\_CHH.Chr04.15974801-15975000  
mytileDiff25p200.hypo\_merged\_CHG.Chr04.16385001-16385200  
mytileDiff25p200.hypo\_CpG.Chr04.16385001-16385200  
mytileDiff25p200.hypo\_merged\_CHG.Chr04.17867001-17867200  
mytileDiff25p200.hypo\_CpG.Chr04.19112801-19113000  
mytileDiff25p200.hypo\_merged\_CHG.Chr04.22315201-22315400  
mytileDiff25p200.hypo\_merged\_CHG.Chr04.28664801-28665000  
mytileDiff25p200.hypo\_merged\_CHG.Chr04.35998601-35998800  
mytileDiff25p200.hypo\_CpG.Chr04.36767801-36768000  
mytileDiff25p200.hypo\_CpG.Chr04.37093201-37093400  
mytileDiff25p200.hypo\_merged\_CHG.Chr04.38567801-38568000  
mytileDiff25p200.hypo\_merged\_CHG.Chr04.40239201-40239400  
mytileDiff25p200.hypo\_CpG.Chr04.43949001-43949200  
mytileDiff25p200.hypo\_CpG.Chr04.44078001-44078200  
mytileDiff25p200.hypo\_merged\_CHG.Chr04.44994601-44994800  
mytileDiff25p200.hypo\_merged\_CHG.Chr04.44968401-44968600  
mytileDiff25p200.hypo\_CpG.Chr04.45908201-45908400  
mytileDiff25p200.hypo\_CpG.Chr04.46134601-46134800  
mytileDiff25p200.hypo\_merged\_CHH.Chr04.46177001-46177200  
mytileDiff25p200.hypo\_merged\_CHH.Chr04.46510801-46511000  
mytileDiff25p200.hypo\_CpG.Chr04.46541001-46541200  
mytileDiff25p200.hypo\_merged\_CHH.Chr04.46638601-46638800  
mytileDiff25p200.hypo\_merged\_CHH.Chr04.47754001-47754200  
mytileDiff25p200.hypo\_CpG.Chr04.48224001-48224200  
mytileDiff25p200.hypo\_merged\_CHH.Chr04.48897401-48897600  
mytileDiff25p200.hypo\_merged\_CHH.Chr04.50267801-50268000  
mytileDiff25p200.hypo\_CpG.Chr04.51292601-51292800  
mytileDiff25p200.hypo\_CpG.Chr04.51936201-51936400  
mytileDiff25p200.hypo\_CpG.Chr05.61801-62000  
mytileDiff25p200.hypo\_CpG.Chr05.431401-431600  
mytileDiff25p200.hypo\_CpG.Chr05.835001-835200  
mytileDiff25p200.hypo\_CpG.Chr05.1286201-1286400  
mytileDiff25p200.hypo\_CpG.Chr05.1855601-1855800  
mytileDiff25p200.hypo\_CpG.Chr05.2639801-2640000  
mytileDiff25p200.hypo\_CpG.Chr05.2728601-2728800

mytileDiff25p20.hypo\_merged\_CHG.Chr05.2784001-2784200  
mytileDiff25p20.hypo\_merged\_CHG.Chr05.2849801-2850000  
mytileDiff25p20.hypo\_CpG.Chr05.2850601-2850800  
mytileDiff25p20.hypo\_CpG.Chr05.2850001-2850200  
mytileDiff25p20.hypo\_CpG.Chr05.3167401-3167600  
mytileDiff25p20.hypo\_CpG.Chr05.3645401-3645600  
mytileDiff25p20.hypo\_CpG.Chr05.3733401-3733600  
mytileDiff25p20.hypo\_merged\_CHG.Chr05.3976801-3977000  
mytileDiff25p20.hypo\_merged\_CHH.Chr05.4002201-4002400  
mytileDiff25p20.hypo\_CpG.Chr05.4213001-4213200  
mytileDiff25p20.hypo\_CpG.Chr05.4422201-4422400  
mytileDiff25p20.hypo\_merged\_CHH.Chr05.4748401-4748600  
mytileDiff25p20.hypo\_merged\_CHG.Chr05.5613801-5614000  
mytileDiff25p20.hypo\_CpG.Chr05.5613801-5614000  
mytileDiff25p20.hypo\_merged\_CHG.Chr05.5673401-5673600  
mytileDiff25p20.hypo\_CpG.Chr05.5963201-5963400  
mytileDiff25p20.hypo\_merged\_CHG.Chr05.6798201-6798400  
mytileDiff25p20.hypo\_CpG.Chr05.6798201-6798400  
mytileDiff25p20.hypo\_CpG.Chr05.6903001-6903200  
mytileDiff25p20.hypo\_CpG.Chr05.7140801-7141000  
mytileDiff25p20.hypo\_CpG.Chr05.9248401-9248600  
mytileDiff25p20.hypo\_CpG.Chr05.9248401-9248600  
mytileDiff25p20.hypo\_merged\_CHG.Chr05.9320601-9320800  
mytileDiff25p20.hypo\_merged\_CHG.Chr05.10543401-10543600  
mytileDiff25p20.hypo\_merged\_CHG.Chr05.10543401-10543600  
mytileDiff25p20.hypo\_CpG.Chr05.11419601-11419800  
mytileDiff25p20.hypo\_CpG.Chr05.11426001-11426200  
mytileDiff25p20.hypo\_merged\_CHH.Chr05.13436001-13436200  
mytileDiff25p20.hypo\_CpG.Chr05.14962001-14962200  
mytileDiff25p20.hypo\_merged\_CHG.Chr05.26683401-26683600  
mytileDiff25p20.hypo\_merged\_CHG.Chr05.26683201-26683400  
mytileDiff25p20.hypo\_merged\_CHG.Chr05.26682001-26682200  
mytileDiff25p20.hypo\_CpG.Chr05.29213201-29213400  
mytileDiff25p20.hypo\_merged\_CHG.Chr05.30570801-30571000  
mytileDiff25p20.hypo\_CpG.Chr05.31098001-31098200  
mytileDiff25p20.hypo\_CpG.Chr05.31111801-31112000  
mytileDiff25p20.hypo\_CpG.Chr05.31329201-31329400  
mytileDiff25p20.hypo\_merged\_CHH.Chr05.31841201-31841400  
mytileDiff25p20.hypo\_merged\_CHG.Chr05.32891401-32891600  
mytileDiff25p20.hypo\_CpG.Chr05.33671801-33672000  
mytileDiff25p20.hypo\_CpG.Chr05.34420801-34421000  
mytileDiff25p20.hypo\_CpG.Chr05.34483601-34483800  
mytileDiff25p20.hypo\_merged\_CHH.Chr05.34791001-34791200  
mytileDiff25p20.hypo\_merged\_CHH.Chr05.35270601-35270800



mytileDiff25p200.hypo\_CpG.Chr05.35485201-35485400  
mytileDiff25p200.hypo\_CpG.Chr05.36545401-36545600  
mytileDiff25p200.hypo\_CpG.Chr05.36820201-36820400  
mytileDiff25p200.hypo\_CpG.Chr05.37292001-37292200  
mytileDiff25p200.hypo\_CpG.Chr05.37924801-37925000  
mytileDiff25p200.hypo\_CpG.Chr05.38426801-38427000  
mytileDiff25p200.hypo\_CpG.Chr05.39014801-39015000  
mytileDiff25p200.hypo\_CpG.Chr05.40060401-40060600  
mytileDiff25p200.hypo\_CpG.Chr05.40360201-40360400  
mytileDiff25p200.hypo\_merged\_CHG.Chr05.41281401-41281600  
mytileDiff25p200.hypo\_merged\_CHG.Chr05.41283601-41283800  
mytileDiff25p200.hypo\_merged\_CHG.Chr05.41282801-41283000  
mytileDiff25p200.hypo\_merged\_CHG.Chr05.41282601-41282800  
mytileDiff25p200.hypo\_merged\_CHG.Chr05.41282401-41282600  
mytileDiff25p200.hypo\_merged\_CHH.Chr05.42115601-42115800  
mytileDiff25p200.hypo\_CpG.Chr06.1223601-1223800  
mytileDiff25p200.hypo\_CpG.Chr06.1224401-1224600  
mytileDiff25p200.hypo\_CpG.Chr06.1233801-1234000  
mytileDiff25p200.hypo\_CpG.Chr06.1233801-1234000  
mytileDiff25p200.hypo\_CpG.Chr06.1415401-1415600  
mytileDiff25p200.hypo\_merged\_CHH.Chr06.2538601-2538800  
mytileDiff25p200.hypo\_merged\_CHH.Chr06.2600201-2600400  
mytileDiff25p200.hypo\_CpG.Chr06.3677801-3678000  
mytileDiff25p200.hypo\_merged\_CHH.Chr06.4246001-4246200  
mytileDiff25p200.hypo\_merged\_CHH.Chr06.4658401-4658600  
mytileDiff25p200.hypo\_merged\_CHG.Chr06.5116401-5116600  
mytileDiff25p200.hypo\_merged\_CHH.Chr06.5636801-5637000  
mytileDiff25p200.hypo\_merged\_CHG.Chr06.6985601-6985800  
mytileDiff25p200.hypo\_merged\_CHG.Chr06.6985001-6985200  
mytileDiff25p200.hypo\_CpG.Chr06.6985001-6985200  
mytileDiff25p200.hypo\_CpG.Chr06.6984801-6985000  
mytileDiff25p200.hypo\_CpG.Chr06.7798401-7798600  
mytileDiff25p200.hypo\_CpG.Chr06.7882601-7882800  
mytileDiff25p200.hypo\_merged\_CHG.Chr06.8702201-8702400  
mytileDiff25p200.hypo\_CpG.Chr06.8767801-8768000  
mytileDiff25p200.hypo\_CpG.Chr06.9000401-9000600  
mytileDiff25p200.hypo\_merged\_CHH.Chr06.9293401-9293600  
mytileDiff25p200.hypo\_merged\_CHG.Chr06.9349001-9349200  
mytileDiff25p200.hypo\_CpG.Chr06.9484601-9484800  
mytileDiff25p200.hypo\_CpG.Chr06.9994601-9994800  
mytileDiff25p200.hypo\_CpG.Chr06.1002201-10022400  
mytileDiff25p200.hypo\_merged\_CHH.Chr06.10292401-10292600  
mytileDiff25p200.hypo\_CpG.Chr06.10750801-10751000  
mytileDiff25p200.hypo\_CpG.Chr06.11257601-11257800

mytileDiff25p200.hypo\_CpG.Chr06.11947601-11947800  
mytileDiff25p200.hypo\_CpG.Chr06.12146401-12146600  
mytileDiff25p200.hypo\_CpG.Chr06.13055801-13056000  
mytileDiff25p200.hypo\_CpG.Chr06.13202401-13202600  
mytileDiff25p200.hypo\_CpG.Chr06.13558601-13558800  
mytileDiff25p200.hypo\_CpG.Chr06.14591801-14592000  
mytileDiff25p200.hypo\_merged\_CHG.Chr06.14622001-14622200  
mytileDiff25p200.hypo\_CpG.Chr06.14611001-14611200  
mytileDiff25p200.hypo\_CpG.Chr06.14611001-14611200  
mytileDiff25p200.hypo\_merged\_CHH.Chr06.15229601-15229800  
mytileDiff25p200.hypo\_merged\_CHG.Chr06.16074001-16074200  
mytileDiff25p200.hypo\_merged\_CHG.Chr06.17477001-17477200  
mytileDiff25p200.hypo\_CpG.Chr06.17477001-17477200  
mytileDiff25p200.hypo\_CpG.Chr06.17477201-17477400  
mytileDiff25p200.hypo\_merged\_CHG.Chr06.17477201-17477400  
mytileDiff25p200.hypo\_merged\_CHG.Chr06.17962001-17962200  
mytileDiff25p200.hypo\_CpG.Chr06.18289601-18289800  
mytileDiff25p200.hypo\_CpG.Chr06.18538401-18538600  
mytileDiff25p200.hypo\_merged\_CHG.Chr06.18846601-18846800  
mytileDiff25p200.hypo\_merged\_CHG.Chr06.19395801-19396000  
mytileDiff25p200.hypo\_CpG.Chr06.20519001-20519200  
mytileDiff25p200.hypo\_CpG.Chr06.20574401-20574600  
mytileDiff25p200.hypo\_merged\_CHH.Chr06.20964401-20964600  
mytileDiff25p200.hypo\_CpG.Chr06.21387801-21388000  
mytileDiff25p200.hypo\_CpG.Chr06.21387801-21388000  
mytileDiff25p200.hypo\_CpG.Chr06.21553001-21553200  
mytileDiff25p200.hypo\_merged\_CHG.Chr06.22013001-22013200  
mytileDiff25p200.hypo\_merged\_CHG.Chr06.22012801-22013000  
mytileDiff25p200.hypo\_CpG.Chr06.22012801-22013000  
mytileDiff25p200.hypo\_merged\_CHG.Chr06.23642001-23642200  
mytileDiff25p200.hypo\_merged\_CHG.Chr06.23641801-23642000  
mytileDiff25p200.hypo\_CpG.Chr06.23642001-23642200  
mytileDiff25p200.hypo\_CpG.Chr06.26237601-26237800  
mytileDiff25p200.hypo\_merged\_CHH.Chr06.29534201-29534400  
mytileDiff25p200.hypo\_CpG.Chr06.29692401-29692600  
mytileDiff25p200.hypo\_merged\_CHG.Chr06.34550401-34550600  
mytileDiff25p200.hypo\_merged\_CHG.Chr06.34550201-34550400  
mytileDiff25p200.hypo\_CpG.Chr06.34550401-34550600  
mytileDiff25p200.hypo\_CpG.Chr06.35724601-35724800  
mytileDiff25p200.hypo\_CpG.Chr06.38802801-38803000  
mytileDiff25p200.hypo\_CpG.Chr06.39013201-39013400  
mytileDiff25p200.hypo\_CpG.Chr06.39013201-39013400  
mytileDiff25p200.hypo\_merged\_CHG.Chr06.39107801-39108000  
mytileDiff25p200.hypo\_CpG.Chr06.39282201-39282400

mytileDiff25p200.hypo\_CpG.Chr06.40395201-40395400  
mytileDiff25p200.hypo\_merged\_CHG.Chr06.40503801-40504000  
mytileDiff25p200.hypo\_merged\_CHG.Chr06.40553001-40553200  
mytileDiff25p200.hypo\_merged\_CHH.Chr06.41711401-41711600  
mytileDiff25p200.hypo\_CpG.Chr06.41711401-41711600  
mytileDiff25p200.hypo\_CpG.Chr06.43245201-43245400  
mytileDiff25p200.hypo\_CpG.Chr06.43770801-43771000  
mytileDiff25p200.hypo\_CpG.Chr06.43770401-43770600  
mytileDiff25p200.hypo\_CpG.Chr06.44469001-44469200  
mytileDiff25p200.hypo\_CpG.Chr06.44523201-44523400  
mytileDiff25p200.hypo\_CpG.Chr06.44523001-44523200  
mytileDiff25p200.hypo\_merged\_CHG.Chr06.44798401-44798600  
mytileDiff25p200.hypo\_CpG.Chr06.45395401-45395600  
mytileDiff25p200.hypo\_CpG.Chr06.45730601-45730800  
mytileDiff25p200.hypo\_CpG.Chr06.45756201-45756400  
mytileDiff25p200.hypo\_CpG.Chr06.45756201-45756400  
mytileDiff25p200.hypo\_CpG.Chr06.45830401-45830600  
mytileDiff25p200.hypo\_merged\_CHG.Chr06.46208801-46209000  
mytileDiff25p200.hypo\_CpG.Chr06.46654401-46654600  
mytileDiff25p200.hypo\_merged\_CHH.Chr06.46731801-46732000  
mytileDiff25p200.hypo\_merged\_CHH.Chr06.47363201-47363400  
mytileDiff25p200.hypo\_merged\_CHH.Chr06.47529201-47529400  
mytileDiff25p200.hypo\_merged\_CHG.Chr06.47822001-47822200  
mytileDiff25p200.hypo\_CpG.Chr06.47836201-47836400  
mytileDiff25p200.hypo\_merged\_CHG.Chr06.48557201-48557400  
mytileDiff25p200.hypo\_CpG.Chr06.48646801-48647000  
mytileDiff25p200.hypo\_merged\_CHH.Chr06.49418201-49418400  
mytileDiff25p200.hypo\_CpG.Chr06.49685401-49685600  
mytileDiff25p200.hypo\_merged\_CHG.Chr06.49818401-49818600  
mytileDiff25p200.hypo\_CpG.Chr06.49985401-49985600  
mytileDiff25p200.hypo\_merged\_CHH.Chr06.50442601-50442800  
mytileDiff25p200.hypo\_CpG.Chr06.50686201-50686400  
mytileDiff25p200.hypo\_CpG.Chr07.274001-274200  
mytileDiff25p200.hypo\_CpG.Chr07.381001-381200  
mytileDiff25p200.hypo\_CpG.Chr07.475801-476000  
mytileDiff25p200.hypo\_CpG.Chr07.597401-597600  
mytileDiff25p200.hypo\_CpG.Chr07.671801-672000  
mytileDiff25p200.hypo\_CpG.Chr07.2102201-2102400  
mytileDiff25p200.hypo\_merged\_CHG.Chr07.2265201-2265400  
mytileDiff25p200.hypo\_CpG.Chr07.2265201-2265400  
mytileDiff25p200.hypo\_CpG.Chr07.2347801-2348000  
mytileDiff25p200.hypo\_CpG.Chr07.2359401-2359600  
mytileDiff25p200.hypo\_CpG.Chr07.2744001-2744200  
mytileDiff25p200.hypo\_merged\_CHH.Chr07.2813001-2813200

mytileDiff25p200.hypo\_CpG.Chr07.3620601-3620800  
mytileDiff25p200.hypo\_CpG.Chr07.3840601-3840800  
mytileDiff25p200.hypo\_CpG.Chr07.3971201-3971400  
mytileDiff25p200.hypo\_merged\_CHH.Chr07.4401601-4401800  
mytileDiff25p200.hypo\_merged\_CHG.Chr07.6305401-6305600  
mytileDiff25p200.hypo\_CpG.Chr07.6305401-6305600  
mytileDiff25p200.hypo\_CpG.Chr07.6312201-6312400  
mytileDiff25p200.hypo\_CpG.Chr07.6638601-6638800  
mytileDiff25p200.hypo\_merged\_CHH.Chr07.7054401-7054600  
mytileDiff25p200.hypo\_merged\_CHG.Chr07.7200401-7200600  
mytileDiff25p200.hypo\_merged\_CHG.Chr07.7200401-7200600  
mytileDiff25p200.hypo\_merged\_CHG.Chr07.7200401-7200600  
mytileDiff25p200.hypo\_merged\_CHG.Chr07.7200401-7200600  
mytileDiff25p200.hypo\_merged\_CHH.Chr07.8052601-8052800  
mytileDiff25p200.hypo\_CpG.Chr07.8117001-8117200  
mytileDiff25p200.hypo\_CpG.Chr07.8636001-8636200  
mytileDiff25p200.hypo\_CpG.Chr07.8785801-8786000  
mytileDiff25p200.hypo\_merged\_CHG.Chr07.9602601-9602800  
mytileDiff25p200.hypo\_CpG.Chr07.9903601-9903800  
mytileDiff25p200.hypo\_CpG.Chr07.10474201-10474400  
mytileDiff25p200.hypo\_merged\_CHG.Chr07.11724801-11725000  
mytileDiff25p200.hypo\_merged\_CHH.Chr07.11930201-11930400  
mytileDiff25p200.hypo\_merged\_CHH.Chr07.13047201-13047400  
mytileDiff25p200.hypo\_CpG.Chr07.13755801-13756000  
mytileDiff25p200.hypo\_merged\_CHG.Chr07.14794401-14794600  
mytileDiff25p200.hypo\_merged\_CHH.Chr07.14794401-14794600  
mytileDiff25p200.hypo\_merged\_CHG.Chr07.14937601-14937800  
mytileDiff25p200.hypo\_merged\_CHG.Chr07.14925601-14925800  
mytileDiff25p200.hypo\_CpG.Chr07.15339801-15340000  
mytileDiff25p200.hypo\_merged\_CHH.Chr07.15414601-15414800  
mytileDiff25p200.hypo\_merged\_CHH.Chr07.16132201-16132400  
mytileDiff25p200.hypo\_CpG.Chr07.16135401-16135600  
mytileDiff25p200.hypo\_merged\_CHG.Chr07.17991801-17992000  
mytileDiff25p200.hypo\_CpG.Chr07.18487801-18488000  
mytileDiff25p200.hypo\_CpG.Chr07.18993001-18993200  
mytileDiff25p200.hypo\_CpG.Chr07.19218801-19219000  
mytileDiff25p200.hypo\_merged\_CHH.Chr07.19438801-19439000  
mytileDiff25p200.hypo\_merged\_CHH.Chr07.25166401-25166600  
mytileDiff25p200.hypo\_CpG.Chr07.28613201-28613400  
mytileDiff25p200.hypo\_CpG.Chr07.29359601-29359800  
mytileDiff25p200.hypo\_CpG.Chr07.29571601-29571800  
mytileDiff25p200.hypo\_CpG.Chr07.33319401-33319600  
mytileDiff25p200.hypo\_CpG.Chr07.35219601-35219800  
mytileDiff25p200.hypo\_merged\_CHG.Chr07.35823401-35823600

mytileDiff25p200.hypo\_CpG.Chr07.36528401-36528600  
mytileDiff25p200.hypo\_CpG.Chr07.37326601-37326800  
mytileDiff25p200.hypo\_CpG.Chr07.37374801-37375000  
mytileDiff25p200.hypo\_CpG.Chr07.37506401-37506600  
mytileDiff25p200.hypo\_merged\_CHH.Chr07.37881601-37881800  
mytileDiff25p200.hypo\_merged\_CHH.Chr07.38442401-38442600  
mytileDiff25p200.hypo\_CpG.Chr07.39113001-39113200  
mytileDiff25p200.hypo\_CpG.Chr07.40176001-40176200  
mytileDiff25p200.hypo\_CpG.Chr07.40207601-40207800  
mytileDiff25p200.hypo\_CpG.Chr07.41140401-41140600  
mytileDiff25p200.hypo\_CpG.Chr07.41319201-41319400  
mytileDiff25p200.hypo\_CpG.Chr07.41813001-41813200  
mytileDiff25p200.hypo\_merged\_CHH.Chr07.41844801-41845000  
mytileDiff25p200.hypo\_CpG.Chr07.43491401-43491600  
mytileDiff25p200.hypo\_merged\_CHG.Chr07.43834401-43834600  
mytileDiff25p200.hypo\_CpG.Chr07.43834401-43834600  
mytileDiff25p200.hypo\_merged\_CHH.Chr07.44186201-44186400  
mytileDiff25p200.hypo\_merged\_CHH.Chr07.44601001-44601200  
mytileDiff25p200.hypo\_merged\_CHH.Chr07.44601001-44601200  
mytileDiff25p200.hypo\_CpG.Chr08.376001-376200  
mytileDiff25p200.hypo\_CpG.Chr08.1020001-1020200  
mytileDiff25p200.hypo\_CpG.Chr08.1055801-1056000  
mytileDiff25p200.hypo\_CpG.Chr08.2213001-2213200  
mytileDiff25p200.hypo\_CpG.Chr08.2258401-2258600  
mytileDiff25p200.hypo\_CpG.Chr08.2265401-2265600  
mytileDiff25p200.hypo\_merged\_CHH.Chr08.2891801-2892000  
mytileDiff25p200.hypo\_merged\_CHH.Chr08.3138601-3138800  
mytileDiff25p200.hypo\_CpG.Chr08.3307401-3307600  
mytileDiff25p200.hypo\_CpG.Chr08.3305001-3305200  
mytileDiff25p200.hypo\_CpG.Chr08.3564601-3564800  
mytileDiff25p200.hypo\_CpG.Chr08.4881801-4882000  
mytileDiff25p200.hypo\_CpG.Chr08.5013401-5013600  
mytileDiff25p200.hypo\_CpG.Chr08.5501601-5501800  
mytileDiff25p200.hypo\_CpG.Chr08.5698201-5698400  
mytileDiff25p200.hypo\_CpG.Chr08.5791001-5791200  
mytileDiff25p200.hypo\_CpG.Chr08.6249001-6249200  
mytileDiff25p200.hypo\_CpG.Chr08.6295001-6295200  
mytileDiff25p200.hypo\_CpG.Chr08.7019601-7019800  
mytileDiff25p200.hypo\_CpG.Chr08.7479601-7479800  
mytileDiff25p200.hypo\_CpG.Chr08.7733801-7734000  
mytileDiff25p200.hypo\_CpG.Chr08.8333201-8333400  
mytileDiff25p200.hypo\_CpG.Chr08.8590801-8591000  
mytileDiff25p200.hypo\_merged\_CHH.Chr08.8877001-8877200  
mytileDiff25p200.hypo\_CpG.Chr08.9672401-9672600

mytileDiff25p200.hypo\_merged\_CHG.Chr08.9799801-9800000  
mytileDiff25p200.hypo\_merged\_CHG.Chr08.10657601-10657800  
mytileDiff25p200.hypo\_merged\_CHG.Chr08.10720801-10721000  
mytileDiff25p200.hypo\_merged\_CHH.Chr08.10741401-10741600  
mytileDiff25p200.hypo\_CpG.Chr08.10780401-10780600  
mytileDiff25p200.hypo\_CpG.Chr08.11648201-11648400  
mytileDiff25p200.hypo\_CpG.Chr08.13536001-13536200  
mytileDiff25p200.hypo\_CpG.Chr08.13693801-13694000  
mytileDiff25p200.hypo\_CpG.Chr08.15366801-15367000  
mytileDiff25p200.hypo\_CpG.Chr08.15461401-15461600  
mytileDiff25p200.hypo\_merged\_CHG.Chr08.15684001-15684200  
mytileDiff25p200.hypo\_merged\_CHH.Chr08.15952801-15953000  
mytileDiff25p200.hypo\_CpG.Chr08.16455401-16455600  
mytileDiff25p200.hypo\_CpG.Chr08.16968001-16968200  
mytileDiff25p200.hypo\_merged\_CHG.Chr08.17257201-17257400  
mytileDiff25p200.hypo\_merged\_CHH.Chr08.17832401-17832600  
mytileDiff25p200.hypo\_merged\_CHH.Chr08.17937401-17937600  
mytileDiff25p200.hypo\_CpG.Chr08.18060601-18060800  
mytileDiff25p200.hypo\_CpG.Chr08.18592401-18592600  
mytileDiff25p200.hypo\_merged\_CHG.Chr08.19515801-19516000  
mytileDiff25p200.hypo\_CpG.Chr08.19515801-19516000  
mytileDiff25p200.hypo\_CpG.Chr08.19516001-19516200  
mytileDiff25p200.hypo\_CpG.Chr08.19515601-19515800  
mytileDiff25p200.hypo\_merged\_CHG.Chr08.19516601-19516800  
mytileDiff25p200.hypo\_CpG.Chr08.19514801-19515000  
mytileDiff25p200.hypo\_CpG.Chr08.19514601-19514800  
mytileDiff25p200.hypo\_merged\_CHG.Chr08.19514601-19514800  
mytileDiff25p200.hypo\_merged\_CHG.Chr08.20022401-20022600  
mytileDiff25p200.hypo\_merged\_CHG.Chr08.20052001-20052200  
mytileDiff25p200.hypo\_merged\_CHG.Chr08.20051801-20052000  
mytileDiff25p200.hypo\_merged\_CHG.Chr08.20051601-20051800  
mytileDiff25p200.hypo\_CpG.Chr08.20051801-20052000  
mytileDiff25p200.hypo\_CpG.Chr08.20253601-20253800  
mytileDiff25p200.hypo\_CpG.Chr08.20283001-20283200  
mytileDiff25p200.hypo\_CpG.Chr08.20283201-20283400  
mytileDiff25p200.hypo\_merged\_CHG.Chr08.20361801-20362000  
mytileDiff25p200.hypo\_CpG.Chr08.20392001-20392200  
mytileDiff25p200.hypo\_merged\_CHH.Chr08.20403601-20403800  
mytileDiff25p200.hypo\_merged\_CHH.Chr08.20497201-20497400  
mytileDiff25p200.hypo\_CpG.Chr08.20583001-20583200  
mytileDiff25p200.hypo\_merged\_CHH.Chr08.20680401-20680600  
mytileDiff25p200.hypo\_CpG.Chr08.20788601-20788800  
mytileDiff25p200.hypo\_CpG.Chr08.21748201-21748400  
mytileDiff25p200.hypo\_merged\_CHG.Chr08.22360201-22360400

mytileDiff25p200.hypo\_CpG.Chr08.23382001-23382200  
mytileDiff25p200.hypo\_CpG.Chr08.23382001-23382200  
mytileDiff25p200.hypo\_merged\_CHH.Chr08.30752601-30752800  
mytileDiff25p200.hypo\_merged\_CHG.Chr08.30716801-30717000  
mytileDiff25p200.hypo\_merged\_CHG.Chr08.31505201-31505400  
mytileDiff25p200.hypo\_merged\_CHH.Chr08.34588401-34588600  
mytileDiff25p200.hypo\_merged\_CHH.Chr08.35508801-35509000  
mytileDiff25p200.hypo\_merged\_CHG.Chr08.35767601-35767800  
mytileDiff25p200.hypo\_merged\_CHG.Chr08.35767401-35767600  
mytileDiff25p200.hypo\_merged\_CHG.Chr08.36421801-36422000  
mytileDiff25p200.hypo\_CpG.Chr08.36421801-36422000  
mytileDiff25p200.hypo\_CpG.Chr08.36421601-36421800  
mytileDiff25p200.hypo\_merged\_CHG.Chr08.36421401-36421600  
mytileDiff25p200.hypo\_CpG.Chr08.36421401-36421600  
mytileDiff25p200.hypo\_merged\_CHG.Chr08.36837601-36837800  
mytileDiff25p200.hypo\_CpG.Chr08.36837401-36837600  
mytileDiff25p200.hypo\_CpG.Chr08.36837601-36837800  
mytileDiff25p200.hypo\_merged\_CHG.Chr08.37717001-37717200  
mytileDiff25p200.hypo\_CpG.Chr08.37748001-37748200  
mytileDiff25p200.hypo\_merged\_CHG.Chr08.37883801-37884000  
mytileDiff25p200.hypo\_merged\_CHH.Chr08.37878401-37878600  
mytileDiff25p200.hypo\_CpG.Chr08.38722201-38722400  
mytileDiff25p200.hypo\_CpG.Chr08.38990201-38990400  
mytileDiff25p200.hypo\_merged\_CHG.Chr08.40031401-40031600  
mytileDiff25p200.hypo\_merged\_CHG.Chr08.40569401-40569600  
mytileDiff25p200.hypo\_CpG.Chr08.41902401-41902600  
mytileDiff25p200.hypo\_CpG.Chr08.44299401-44299600  
mytileDiff25p200.hypo\_merged\_CHH.Chr08.44636601-44636800  
mytileDiff25p200.hypo\_merged\_CHG.Chr08.45975801-45976000  
mytileDiff25p200.hypo\_merged\_CHH.Chr08.46330201-46330400  
mytileDiff25p200.hypo\_merged\_CHH.Chr08.46959801-46960000  
mytileDiff25p200.hypo\_merged\_CHG.Chr08.46959801-46960000  
mytileDiff25p200.hypo\_CpG.Chr08.47378801-47379000  
mytileDiff25p200.hypo\_CpG.Chr09.224001-224200  
mytileDiff25p200.hypo\_CpG.Chr09.233001-233200  
mytileDiff25p200.hypo\_CpG.Chr09.1004601-1004800  
mytileDiff25p200.hypo\_CpG.Chr09.1157801-1158000  
mytileDiff25p200.hypo\_CpG.Chr09.1310201-1310400  
mytileDiff25p200.hypo\_CpG.Chr09.1324201-1324400  
mytileDiff25p200.hypo\_CpG.Chr09.1919201-1919400  
mytileDiff25p200.hypo\_CpG.Chr09.1959601-1959800  
mytileDiff25p200.hypo\_CpG.Chr09.2020801-2021000  
mytileDiff25p200.hypo\_CpG.Chr09.2057801-2058000  
mytileDiff25p200.hypo\_CpG.Chr09.2229001-2229200

mytileDiff25p200.hypo\_CpG.Chr09.2443201-2443400  
mytileDiff25p200.hypo\_CpG.Chr09.2509801-2510000  
mytileDiff25p200.hypo\_merged\_CHH.Chr09.3661401-3661600  
mytileDiff25p200.hypo\_merged\_CHG.Chr09.4019801-4020000  
mytileDiff25p200.hypo\_CpG.Chr09.4019801-4020000  
mytileDiff25p200.hypo\_merged\_CHH.Chr09.4264001-4264200  
mytileDiff25p200.hypo\_merged\_CHH.Chr09.5002801-5003000  
mytileDiff25p200.hypo\_CpG.Chr09.5015201-5015400  
mytileDiff25p200.hypo\_merged\_CHG.Chr09.5179401-5179600  
mytileDiff25p200.hypo\_CpG.Chr09.5253601-5253800  
mytileDiff25p200.hypo\_merged\_CHG.Chr09.6378601-6378800  
mytileDiff25p200.hypo\_merged\_CHG.Chr09.6378001-6378200  
mytileDiff25p200.hypo\_merged\_CHH.Chr09.6937401-6937600  
mytileDiff25p200.hypo\_CpG.Chr09.7211601-7211800  
mytileDiff25p200.hypo\_CpG.Chr09.7540601-7540800  
mytileDiff25p200.hypo\_merged\_CHH.Chr09.7654201-7654400  
mytileDiff25p200.hypo\_CpG.Chr09.8770401-8770600  
mytileDiff25p200.hypo\_merged\_CHG.Chr09.10045201-10045400  
mytileDiff25p200.hypo\_merged\_CHG.Chr09.10144601-10144800  
mytileDiff25p200.hypo\_CpG.Chr09.11900801-11901000  
mytileDiff25p200.hypo\_merged\_CHG.Chr09.14244801-14245000  
mytileDiff25p200.hypo\_merged\_CHH.Chr09.21296401-21296600  
mytileDiff25p200.hypo\_merged\_CHG.Chr09.21806201-21806400  
mytileDiff25p200.hypo\_merged\_CHG.Chr09.21806201-21806400  
mytileDiff25p200.hypo\_merged\_CHH.Chr09.22180001-22180200  
mytileDiff25p200.hypo\_merged\_CHH.Chr09.22411001-22411200  
mytileDiff25p200.hypo\_merged\_CHG.Chr09.27027201-27027400  
mytileDiff25p200.hypo\_CpG.Chr09.28758201-28758400  
mytileDiff25p200.hypo\_merged\_CHG.Chr09.29200401-29200600  
mytileDiff25p200.hypo\_merged\_CHG.Chr09.30191401-30191600  
mytileDiff25p200.hypo\_merged\_CHH.Chr09.30839601-30839800  
mytileDiff25p200.hypo\_merged\_CHH.Chr09.31116001-31116200  
mytileDiff25p200.hypo\_merged\_CHG.Chr09.32431601-32431800  
mytileDiff25p200.hypo\_merged\_CHG.Chr09.32617801-32618000  
mytileDiff25p200.hypo\_merged\_CHG.Chr09.36023601-36023800  
mytileDiff25p200.hypo\_CpG.Chr09.36667401-36667600  
mytileDiff25p200.hypo\_merged\_CHG.Chr09.36688201-36688400  
mytileDiff25p200.hypo\_CpG.Chr09.36756401-36756600  
mytileDiff25p200.hypo\_merged\_CHH.Chr09.37637601-37637800  
mytileDiff25p200.hypo\_merged\_CHH.Chr09.37725601-37725800  
mytileDiff25p200.hypo\_CpG.Chr09.39555001-39555200  
mytileDiff25p200.hypo\_CpG.Chr09.39594401-39594600  
mytileDiff25p200.hypo\_CpG.Chr09.39627401-39627600  
mytileDiff25p200.hypo\_merged\_CHH.Chr09.40577001-40577200



mytileDiff25p200.hypo\_merged\_CHH.Chr09.40834201-40834400  
mytileDiff25p200.hypo\_CpG.Chr09.41255401-41255600  
mytileDiff25p200.hypo\_CpG.Chr09.41481601-41481800  
mytileDiff25p200.hypo\_CpG.Chr09.41635201-41635400  
mytileDiff25p200.hypo\_merged\_CHH.Chr09.41774801-41775000  
mytileDiff25p200.hypo\_merged\_CHG.Chr09.41874201-41874400  
mytileDiff25p200.hypo\_CpG.Chr09.42357001-42357200  
mytileDiff25p200.hypo\_merged\_CHG.Chr09.42691801-42692000  
mytileDiff25p200.hypo\_CpG.Chr09.42691801-42692000  
mytileDiff25p200.hypo\_CpG.Chr09.44244001-44244200  
mytileDiff25p200.hypo\_CpG.Chr09.44244001-44244200  
mytileDiff25p200.hypo\_CpG.Chr09.45256401-45256600  
mytileDiff25p200.hypo\_CpG.Chr09.45421601-45421800  
mytileDiff25p200.hypo\_CpG.Chr09.45684001-45684200  
mytileDiff25p200.hypo\_CpG.Chr09.45921801-45922000  
mytileDiff25p200.hypo\_CpG.Chr09.46822001-46822200  
mytileDiff25p200.hypo\_CpG.Chr09.47170801-47171000  
mytileDiff25p200.hypo\_CpG.Chr09.47752601-47752800  
mytileDiff25p200.hypo\_CpG.Chr09.47797601-47797800  
mytileDiff25p200.hypo\_merged\_CHH.Chr09.47801201-47801400  
mytileDiff25p200.hypo\_CpG.Chr09.48838401-48838600  
mytileDiff25p200.hypo\_CpG.Chr09.49525401-49525600  
mytileDiff25p200.hypo\_merged\_CHH.Chr09.50161601-50161800  
mytileDiff25p200.hypo\_merged\_CHG.Chr10.795601-795800  
mytileDiff25p200.hypo\_CpG.Chr10.914201-914400  
mytileDiff25p200.hypo\_CpG.Chr10.1791201-1791400  
mytileDiff25p200.hypo\_CpG.Chr10.2006601-2006800  
mytileDiff25p200.hypo\_merged\_CHG.Chr10.2025801-2026000  
mytileDiff25p200.hypo\_CpG.Chr10.2178601-2178800  
mytileDiff25p200.hypo\_CpG.Chr10.2436001-2436200  
mytileDiff25p200.hypo\_CpG.Chr10.2624401-2624600  
mytileDiff25p200.hypo\_merged\_CHH.Chr10.3038001-3038200  
mytileDiff25p200.hypo\_merged\_CHH.Chr10.3909601-3909800  
mytileDiff25p200.hypo\_CpG.Chr10.4942201-4942400  
mytileDiff25p200.hypo\_merged\_CHH.Chr10.5538601-5538800  
mytileDiff25p200.hypo\_merged\_CHG.Chr10.6352801-6353000  
mytileDiff25p200.hypo\_merged\_CHG.Chr10.6373801-6374000  
mytileDiff25p200.hypo\_merged\_CHG.Chr10.7873801-7874000  
mytileDiff25p200.hypo\_merged\_CHH.Chr10.8897401-8897600  
mytileDiff25p200.hypo\_merged\_CHG.Chr10.8904401-8904600  
mytileDiff25p200.hypo\_CpG.Chr10.10257401-10257600  
mytileDiff25p200.hypo\_merged\_CHG.Chr10.13848201-13848400  
mytileDiff25p200.hypo\_merged\_CHG.Chr10.13848001-13848200  
mytileDiff25p200.hypo\_merged\_CHG.Chr10.13847801-13848000

mytileDiff25p20.hypo\_merged\_CHG.Chr10.13847601-13847800  
mytileDiff25p20.hypo\_merged\_CHG.Chr10.13847401-13847600  
mytileDiff25p20.hypo\_CpG.Chr10.16184601-16184800  
mytileDiff25p20.hypo\_merged\_CHG.Chr10.17202001-17202200  
mytileDiff25p20.hypo\_CpG.Chr10.17202001-17202200  
mytileDiff25p20.hypo\_CpG.Chr10.20674201-20674400  
mytileDiff25p20.hypo\_CpG.Chr10.21512601-21512800  
mytileDiff25p20.hypo\_CpG.Chr10.21511001-21511200  
mytileDiff25p20.hypo\_merged\_CHG.Chr10.22643001-22643200  
mytileDiff25p20.hypo\_merged\_CHG.Chr10.24675001-24675200  
mytileDiff25p20.hypo\_merged\_CHG.Chr10.26257001-26257200  
mytileDiff25p20.hypo\_CpG.Chr10.29661801-29662000  
mytileDiff25p20.hypo\_merged\_CHG.Chr10.30292401-30292600  
mytileDiff25p20.hypo\_CpG.Chr10.30879801-30880000  
mytileDiff25p20.hypo\_merged\_CHG.Chr10.32167601-32167800  
mytileDiff25p20.hypo\_merged\_CHG.Chr10.32151201-32151400  
mytileDiff25p20.hypo\_CpG.Chr10.37821201-37821400  
mytileDiff25p20.hypo\_CpG.Chr10.38387201-38387400  
mytileDiff25p20.hypo\_CpG.Chr10.38518401-38518600  
mytileDiff25p20.hypo\_CpG.Chr10.38653401-38653600  
mytileDiff25p20.hypo\_CpG.Chr10.38653401-38653600  
mytileDiff25p20.hypo\_merged\_CHH.Chr10.38725801-38726000  
mytileDiff25p20.hypo\_merged\_CHH.Chr10.39346801-39347000  
mytileDiff25p20.hypo\_merged\_CHG.Chr10.39381401-39381600  
mytileDiff25p20.hypo\_merged\_CHH.Chr10.39855401-39855600  
mytileDiff25p20.hypo\_CpG.Chr10.40060401-40060600  
mytileDiff25p20.hypo\_CpG.Chr10.40517601-40517800  
mytileDiff25p20.hypo\_merged\_CHH.Chr10.40784601-40784800  
mytileDiff25p20.hypo\_merged\_CHH.Chr10.41608801-41609000  
mytileDiff25p20.hypo\_CpG.Chr10.42083401-42083600  
mytileDiff25p20.hypo\_CpG.Chr10.42233001-42233200  
mytileDiff25p20.hypo\_CpG.Chr10.42420201-42420400  
mytileDiff25p20.hypo\_CpG.Chr10.42747601-42747800  
mytileDiff25p20.hypo\_merged\_CHH.Chr10.42844601-42844800  
mytileDiff25p20.hypo\_CpG.Chr10.43272601-43272800  
mytileDiff25p20.hypo\_merged\_CHG.Chr10.43400601-43400800  
mytileDiff25p20.hypo\_CpG.Chr10.43988201-43988400  
mytileDiff25p20.hypo\_CpG.Chr10.44143601-44143800  
mytileDiff25p20.hypo\_CpG.Chr10.44158201-44158400  
mytileDiff25p20.hypo\_merged\_CHG.Chr10.45973601-45973800  
mytileDiff25p20.hypo\_merged\_CHG.Chr10.46253401-46253600  
mytileDiff25p20.hypo\_CpG.Chr10.46253401-46253600  
mytileDiff25p20.hypo\_merged\_CHH.Chr10.46456201-46456400  
mytileDiff25p20.hypo\_CpG.Chr10.47041801-47042000

mytileDiff25p200.hypo\_merged\_CHH.Chr10.47181201-47181400  
mytileDiff25p200.hypo\_merged\_CHG.Chr10.47443601-47443800  
mytileDiff25p200.hypo\_merged\_CHH.Chr10.50292801-50293000  
mytileDiff25p200.hypo\_CpG.Chr10.50373401-50373600  
mytileDiff25p200.hypo\_merged\_CHG.Chr10.51130401-51130600  
mytileDiff25p200.hypo\_CpG.Chr10.51162001-51162200  
mytileDiff25p200.hypo\_merged\_CHG.Chr10.51537601-51537800  
mytileDiff25p200.hypo\_CpG.Chr11.168401-168600  
mytileDiff25p200.hypo\_CpG.Chr11.608601-608800  
mytileDiff25p200.hypo\_merged\_CHH.Chr11.1415001-1415200  
mytileDiff25p200.hypo\_merged\_CHH.Chr11.1414801-1415000  
mytileDiff25p200.hypo\_merged\_CHG.Chr11.2690801-2691000  
mytileDiff25p200.hypo\_CpG.Chr11.2875601-2875800  
mytileDiff25p200.hypo\_CpG.Chr11.2927401-2927600  
mytileDiff25p200.hypo\_merged\_CHH.Chr11.4164201-4164400  
mytileDiff25p200.hypo\_CpG.Chr11.4308001-4308200  
mytileDiff25p200.hypo\_CpG.Chr11.4953001-4953200  
mytileDiff25p200.hypo\_CpG.Chr11.6176401-6176600  
mytileDiff25p200.hypo\_merged\_CHH.Chr11.7314401-7314600  
mytileDiff25p200.hypo\_CpG.Chr11.7806001-7806200  
mytileDiff25p200.hypo\_CpG.Chr11.7806001-7806200  
mytileDiff25p200.hypo\_CpG.Chr11.8277201-8277400  
mytileDiff25p200.hypo\_CpG.Chr11.8370401-8370600  
mytileDiff25p200.hypo\_CpG.Chr11.8398201-8398400  
mytileDiff25p200.hypo\_merged\_CHH.Chr11.9870401-9870600  
mytileDiff25p200.hypo\_merged\_CHH.Chr11.10774801-10775000  
mytileDiff25p200.hypo\_CpG.Chr11.12149201-12149400  
mytileDiff25p200.hypo\_merged\_CHH.Chr11.18328201-18328400  
mytileDiff25p200.hypo\_merged\_CHH.Chr11.25293001-25293200  
mytileDiff25p200.hypo\_CpG.Chr11.25984001-25984200  
mytileDiff25p200.hypo\_CpG.Chr11.26057601-26057800  
mytileDiff25p200.hypo\_CpG.Chr11.26383601-26383800  
mytileDiff25p200.hypo\_CpG.Chr11.26566001-26566200  
mytileDiff25p200.hypo\_merged\_CHH.Chr11.26637401-26637600  
mytileDiff25p200.hypo\_CpG.Chr11.26844001-26844200  
mytileDiff25p200.hypo\_merged\_CHH.Chr11.27883201-27883400  
mytileDiff25p200.hypo\_merged\_CHH.Chr11.29046601-29046800  
mytileDiff25p200.hypo\_CpG.Chr11.31805201-31805400  
mytileDiff25p200.hypo\_CpG.Chr11.32391601-32391800  
mytileDiff25p200.hypo\_CpG.Chr11.32391601-32391800  
mytileDiff25p200.hypo\_CpG.Chr11.34306201-34306400  
mytileDiff25p200.hypo\_merged\_CHH.Chr11.34340201-34340400  
mytileDiff25p200.hypo\_merged\_CHG.Chr11.34650001-34650200  
mytileDiff25p200.hypo\_CpG.Chr12.327201-327400

mytileDiff25p200.hypo\_CpG.Chr12.329001-329200  
mytileDiff25p200.hypo\_merged\_CHH.Chr12.1185401-1185600  
mytileDiff25p200.hypo\_CpG.Chr12.2010001-2010200  
mytileDiff25p200.hypo\_CpG.Chr12.2648001-2648200  
mytileDiff25p200.hypo\_merged\_CHH.Chr12.2999001-2999200  
mytileDiff25p200.hypo\_merged\_CHG.Chr12.3665001-3665200  
mytileDiff25p200.hypo\_CpG.Chr12.3665801-3666000  
mytileDiff25p200.hypo\_CpG.Chr12.3665001-3665200  
mytileDiff25p200.hypo\_merged\_CHH.Chr12.3714801-3715000  
mytileDiff25p200.hypo\_merged\_CHH.Chr12.4413401-4413600  
mytileDiff25p200.hypo\_CpG.Chr12.4876401-4876600  
mytileDiff25p200.hypo\_CpG.Chr12.4876401-4876600  
mytileDiff25p200.hypo\_CpG.Chr12.4982401-4982600  
mytileDiff25p200.hypo\_CpG.Chr12.5637601-5637800  
mytileDiff25p200.hypo\_CpG.Chr12.6504201-6504400  
mytileDiff25p200.hypo\_CpG.Chr12.6739001-6739200  
mytileDiff25p200.hypo\_merged\_CHG.Chr12.8240601-8240800  
mytileDiff25p200.hypo\_merged\_CHG.Chr12.11901201-11901400  
mytileDiff25p200.hypo\_merged\_CHH.Chr12.12686201-12686400  
mytileDiff25p200.hypo\_merged\_CHG.Chr12.15257201-15257400  
mytileDiff25p200.hypo\_CpG.Chr12.15257601-15257800  
mytileDiff25p200.hypo\_CpG.Chr12.16067601-16067800  
mytileDiff25p200.hypo\_CpG.Chr12.16319601-16319800  
mytileDiff25p200.hypo\_CpG.Chr12.17522201-17522400  
mytileDiff25p200.hypo\_merged\_CHH.Chr12.17522201-17522400  
mytileDiff25p200.hypo\_merged\_CHH.Chr12.20548801-20549000  
mytileDiff25p200.hypo\_merged\_CHG.Chr12.22911001-22911200  
mytileDiff25p200.hypo\_merged\_CHG.Chr12.23294201-23294400  
mytileDiff25p200.hypo\_CpG.Chr12.24782201-24782400  
mytileDiff25p200.hypo\_merged\_CHG.Chr12.24885201-24885400  
mytileDiff25p200.hypo\_merged\_CHG.Chr12.26140801-26141000  
mytileDiff25p200.hypo\_CpG.Chr12.26779401-26779600  
mytileDiff25p200.hypo\_CpG.Chr12.32050601-32050800  
mytileDiff25p200.hypo\_CpG.Chr12.34057601-34057800  
mytileDiff25p200.hypo\_CpG.Chr12.34140401-34140600  
mytileDiff25p200.hypo\_merged\_CHH.Chr12.35397001-35397200  
mytileDiff25p200.hypo\_merged\_CHH.Chr12.35945201-35945400  
mytileDiff25p200.hypo\_CpG.Chr12.35945201-35945400  
mytileDiff25p200.hypo\_CpG.Chr12.36188601-36188800  
mytileDiff25p200.hypo\_CpG.Chr12.36408401-36408600  
mytileDiff25p200.hypo\_merged\_CHG.Chr12.36588401-36588600  
mytileDiff25p200.hypo\_CpG.Chr12.36591201-36591400  
mytileDiff25p200.hypo\_CpG.Chr12.36852201-36852400  
mytileDiff25p200.hypo\_CpG.Chr12.37362201-37362400

mytileDiff25p20.hypo\_merged\_CHH.Chr12.37543001-37543200  
mytileDiff25p20.hypo\_CpG.Chr12.37891201-37891400  
mytileDiff25p20.hypo\_merged\_CHH.Chr12.38284801-38285000  
mytileDiff25p20.hypo\_CpG.Chr12.38674201-38674400  
mytileDiff25p20.hypo\_CpG.Chr12.38995401-38995600  
mytileDiff25p20.hypo\_CpG.Chr12.39043801-39044000  
mytileDiff25p20.hypo\_merged\_CHH.Chr12.39182001-39182200  
mytileDiff25p20.hypo\_merged\_CHH.Chr12.39432601-39432800  
mytileDiff25p20.hypo\_CpG.Chr12.39994601-39994800  
mytileDiff25p20.hypo\_merged\_CHG.Chr13.1003201-1003400  
mytileDiff25p20.hypo\_CpG.Chr13.1852001-1852200  
mytileDiff25p20.hypo\_merged\_CHH.Chr13.2724601-2724800  
mytileDiff25p20.hypo\_merged\_CHH.Chr13.2724401-2724600  
mytileDiff25p20.hypo\_CpG.Chr13.5479801-5480000  
mytileDiff25p20.hypo\_merged\_CHG.Chr13.6127201-6127400  
mytileDiff25p20.hypo\_CpG.Chr13.9599001-9599200  
mytileDiff25p20.hypo\_CpG.Chr13.9599201-9599400  
mytileDiff25p20.hypo\_merged\_CHG.Chr13.9599401-9599600  
mytileDiff25p20.hypo\_merged\_CHG.Chr13.9599201-9599400  
mytileDiff25p20.hypo\_merged\_CHG.Chr13.9599401-9599600  
mytileDiff25p20.hypo\_merged\_CHG.Chr13.9599201-9599400  
mytileDiff25p20.hypo\_CpG.Chr13.9599001-9599200  
mytileDiff25p20.hypo\_CpG.Chr13.9599201-9599400  
mytileDiff25p20.hypo\_merged\_CHG.Chr13.10063801-10064000  
mytileDiff25p20.hypo\_merged\_CHG.Chr13.10932601-10932800  
mytileDiff25p20.hypo\_CpG.Chr13.11207601-11207800  
mytileDiff25p20.hypo\_CpG.Chr13.11480601-11480800  
mytileDiff25p20.hypo\_CpG.Chr13.11846401-11846600  
mytileDiff25p20.hypo\_merged\_CHH.Chr13.13560801-13561000  
mytileDiff25p20.hypo\_merged\_CHG.Chr13.14437001-14437200  
mytileDiff25p20.hypo\_CpG.Chr13.14437001-14437200  
mytileDiff25p20.hypo\_CpG.Chr13.14438401-14438600  
mytileDiff25p20.hypo\_CpG.Chr13.14436201-14436400  
mytileDiff25p20.hypo\_merged\_CHH.Chr13.14950801-14951000  
mytileDiff25p20.hypo\_CpG.Chr13.15099401-15099600  
mytileDiff25p20.hypo\_CpG.Chr13.15604801-15605000  
mytileDiff25p20.hypo\_CpG.Chr13.15618801-15619000  
mytileDiff25p20.hypo\_merged\_CHG.Chr13.15645601-15645800  
mytileDiff25p20.hypo\_merged\_CHH.Chr13.15700801-15701000  
mytileDiff25p20.hypo\_merged\_CHG.Chr13.15956801-15957000  
mytileDiff25p20.hypo\_CpG.Chr13.15956801-15957000  
mytileDiff25p20.hypo\_CpG.Chr13.16216801-16217000  
mytileDiff25p20.hypo\_CpG.Chr13.16753001-16753200  
mytileDiff25p20.hypo\_CpG.Chr13.17658001-17658200

mytileDiff25p200.hypo\_merged\_CHG.Chr13.18402401-18402600  
mytileDiff25p200.hypo\_CpG.Chr13.18402201-18402400  
mytileDiff25p200.hypo\_CpG.Chr13.18504601-18504800  
mytileDiff25p200.hypo\_CpG.Chr13.19520001-19520200  
mytileDiff25p200.hypo\_merged\_CHH.Chr13.20379601-20379800  
mytileDiff25p200.hypo\_merged\_CHH.Chr13.22914001-22914200  
mytileDiff25p200.hypo\_CpG.Chr13.23188601-23188800  
mytileDiff25p200.hypo\_CpG.Chr13.24045801-24046000  
mytileDiff25p200.hypo\_CpG.Chr13.24167201-24167400  
mytileDiff25p200.hypo\_merged\_CHH.Chr13.24272201-24272400  
mytileDiff25p200.hypo\_CpG.Chr13.24281801-24282000  
mytileDiff25p200.hypo\_merged\_CHH.Chr13.24327201-24327400  
mytileDiff25p200.hypo\_CpG.Chr13.24358001-24358200  
mytileDiff25p200.hypo\_CpG.Chr13.24374801-24375000  
mytileDiff25p200.hypo\_CpG.Chr13.24374801-24375000  
mytileDiff25p200.hypo\_merged\_CHH.Chr13.24687601-24687800  
mytileDiff25p200.hypo\_CpG.Chr13.24821801-24822000  
mytileDiff25p200.hypo\_merged\_CHG.Chr13.27186601-27186800  
mytileDiff25p200.hypo\_merged\_CHH.Chr13.27213201-27213400  
mytileDiff25p200.hypo\_merged\_CHG.Chr13.27213201-27213400  
mytileDiff25p200.hypo\_CpG.Chr13.27570801-27571000  
mytileDiff25p200.hypo\_merged\_CHH.Chr13.27588801-27589000  
mytileDiff25p200.hypo\_merged\_CHG.Chr13.28080001-28080200  
mytileDiff25p200.hypo\_CpG.Chr13.28866801-28867000  
mytileDiff25p200.hypo\_merged\_CHG.Chr13.28940601-28940800  
mytileDiff25p200.hypo\_merged\_CHG.Chr13.29845201-29845400  
mytileDiff25p200.hypo\_CpG.Chr13.30253401-30253600  
mytileDiff25p200.hypo\_CpG.Chr13.30416401-30416600  
mytileDiff25p200.hypo\_CpG.Chr13.30837201-30837400  
mytileDiff25p200.hypo\_CpG.Chr13.31045401-31045600  
mytileDiff25p200.hypo\_CpG.Chr13.31058401-31058600  
mytileDiff25p200.hypo\_CpG.Chr13.31244801-31245000  
mytileDiff25p200.hypo\_CpG.Chr13.32326401-32326600  
mytileDiff25p200.hypo\_CpG.Chr13.33461201-33461400  
mytileDiff25p200.hypo\_CpG.Chr13.33644001-33644200  
mytileDiff25p200.hypo\_CpG.Chr13.33803401-33803600  
mytileDiff25p200.hypo\_merged\_CHG.Chr13.34420801-34421000  
mytileDiff25p200.hypo\_CpG.Chr13.34420801-34421000  
mytileDiff25p200.hypo\_CpG.Chr13.34600401-34600600  
mytileDiff25p200.hypo\_merged\_CHH.Chr13.34589801-34590000  
mytileDiff25p200.hypo\_CpG.Chr13.34971801-34972000  
mytileDiff25p200.hypo\_CpG.Chr13.35351801-35352000  
mytileDiff25p200.hypo\_CpG.Chr13.35975401-35975600  
mytileDiff25p200.hypo\_CpG.Chr13.36344401-36344600

mytileDiff25p200.hypo\_merged\_CHH.Chr13.36357601-36357800  
mytileDiff25p200.hypo\_CpG.Chr13.37692801-37693000  
mytileDiff25p200.hypo\_merged\_CHH.Chr13.37859401-37859600  
mytileDiff25p200.hypo\_CpG.Chr13.37896601-37896800  
mytileDiff25p200.hypo\_CpG.Chr13.37995801-37996000  
mytileDiff25p200.hypo\_CpG.Chr13.38337401-38337600  
mytileDiff25p200.hypo\_CpG.Chr13.38494801-38495000  
mytileDiff25p200.hypo\_merged\_CHG.Chr13.38494801-38495000  
mytileDiff25p200.hypo\_merged\_CHH.Chr13.38494801-38495000  
mytileDiff25p200.hypo\_CpG.Chr13.38964801-38965000  
mytileDiff25p200.hypo\_CpG.Chr13.39548801-39549000  
mytileDiff25p200.hypo\_CpG.Chr13.39983001-39983200  
mytileDiff25p200.hypo\_merged\_CHG.Chr13.40225401-40225600  
mytileDiff25p200.hypo\_CpG.Chr13.40225401-40225600  
mytileDiff25p200.hypo\_CpG.Chr13.41636401-41636600  
mytileDiff25p200.hypo\_CpG.Chr13.42140001-42140200  
mytileDiff25p200.hypo\_merged\_CHH.Chr13.42289201-42289400  
mytileDiff25p200.hypo\_CpG.Chr13.43397201-43397400  
mytileDiff25p200.hypo\_merged\_CHH.Chr13.43574201-43574400  
mytileDiff25p200.hypo\_merged\_CHH.Chr13.43574201-43574400  
mytileDiff25p200.hypo\_merged\_CHH.Chr13.44136601-44136800  
mytileDiff25p200.hypo\_CpG.Chr13.44429801-44430000  
mytileDiff25p200.hypo\_merged\_CHH.Chr13.45272601-45272800  
mytileDiff25p200.hypo\_merged\_CHH.Chr13.45372801-45373000  
mytileDiff25p200.hypo\_CpG.Chr13.45650001-45650200  
mytileDiff25p200.hypo\_merged\_CHH.Chr13.45755601-45755800  
mytileDiff25p200.hypo\_merged\_CHG.Chr13.45755601-45755800  
mytileDiff25p200.hypo\_CpG.Chr14.1313401-1313600  
mytileDiff25p200.hypo\_CpG.Chr14.1821401-1821600  
mytileDiff25p200.hypo\_merged\_CHG.Chr14.2270801-2271000  
mytileDiff25p200.hypo\_merged\_CHH.Chr14.3356801-3357000  
mytileDiff25p200.hypo\_CpG.Chr14.3356601-3356800  
mytileDiff25p200.hypo\_CpG.Chr14.3417601-3417800  
mytileDiff25p200.hypo\_merged\_CHG.Chr14.3477801-3478000  
mytileDiff25p200.hypo\_merged\_CHH.Chr14.4442001-4442200  
mytileDiff25p200.hypo\_CpG.Chr14.5422401-5422600  
mytileDiff25p200.hypo\_CpG.Chr14.5431601-5431800  
mytileDiff25p200.hypo\_CpG.Chr14.5492201-5492400  
mytileDiff25p200.hypo\_CpG.Chr14.7258801-7259000  
mytileDiff25p200.hypo\_CpG.Chr14.7405001-7405200  
mytileDiff25p200.hypo\_merged\_CHG.Chr14.8466201-8466400  
mytileDiff25p200.hypo\_CpG.Chr14.8543001-8543200  
mytileDiff25p200.hypo\_CpG.Chr14.8840401-8840600  
mytileDiff25p200.hypo\_CpG.Chr14.8852001-8852200

mytileDiff25p200.hypo\_merged\_CHH.Chr14.8867601-8867800  
mytileDiff25p200.hypo\_CpG.Chr14.9254201-9254400  
mytileDiff25p200.hypo\_CpG.Chr14.9261801-9262000  
mytileDiff25p200.hypo\_CpG.Chr14.9633401-9633600  
mytileDiff25p200.hypo\_merged\_CHG.Chr14.10693201-10693400  
mytileDiff25p200.hypo\_merged\_CHH.Chr14.10752601-10752800  
mytileDiff25p200.hypo\_merged\_CHG.Chr14.10792401-10792600  
mytileDiff25p200.hypo\_merged\_CHG.Chr14.10791201-10791400  
mytileDiff25p200.hypo\_merged\_CHG.Chr14.11114401-11114600  
mytileDiff25p200.hypo\_CpG.Chr14.11114601-11114800  
mytileDiff25p200.hypo\_merged\_CHG.Chr14.11965001-11965200  
mytileDiff25p200.hypo\_CpG.Chr14.11965001-11965200  
mytileDiff25p200.hypo\_merged\_CHG.Chr14.12527001-12527200  
mytileDiff25p200.hypo\_CpG.Chr14.12945201-12945400  
mytileDiff25p200.hypo\_CpG.Chr14.13187001-13187200  
mytileDiff25p200.hypo\_CpG.Chr14.13187001-13187200  
mytileDiff25p200.hypo\_merged\_CHG.Chr14.16617801-16618000  
mytileDiff25p200.hypo\_merged\_CHG.Chr14.16617601-16617800  
mytileDiff25p200.hypo\_merged\_CHG.Chr14.16911801-16912000  
mytileDiff25p200.hypo\_CpG.Chr14.17460201-17460400  
mytileDiff25p200.hypo\_merged\_CHG.Chr14.21300001-21300200  
mytileDiff25p200.hypo\_CpG.Chr14.21708201-21708400  
mytileDiff25p200.hypo\_merged\_CHH.Chr14.22556201-22556400  
mytileDiff25p200.hypo\_CpG.Chr14.22731601-22731800  
mytileDiff25p200.hypo\_CpG.Chr14.22728001-22728200  
mytileDiff25p200.hypo\_CpG.Chr14.24573401-24573600  
mytileDiff25p200.hypo\_merged\_CHH.Chr14.24651801-24652000  
mytileDiff25p200.hypo\_merged\_CHG.Chr14.26607201-26607400  
mytileDiff25p200.hypo\_merged\_CHG.Chr14.27583401-27583600  
mytileDiff25p200.hypo\_CpG.Chr14.28566401-28566600  
mytileDiff25p200.hypo\_merged\_CHG.Chr14.28603601-28603800  
mytileDiff25p200.hypo\_merged\_CHG.Chr14.30185801-30186000  
mytileDiff25p200.hypo\_merged\_CHG.Chr14.32531401-32531600  
mytileDiff25p200.hypo\_merged\_CHH.Chr14.32615401-32615600  
mytileDiff25p200.hypo\_CpG.Chr14.35614201-35614400  
mytileDiff25p200.hypo\_CpG.Chr14.35614001-35614200  
mytileDiff25p200.hypo\_CpG.Chr14.35614401-35614600  
mytileDiff25p200.hypo\_merged\_CHG.Chr14.35614201-35614400  
mytileDiff25p200.hypo\_merged\_CHG.Chr14.37187401-37187600  
mytileDiff25p200.hypo\_merged\_CHG.Chr14.37186801-37187000  
mytileDiff25p200.hypo\_CpG.Chr14.37186801-37187000  
mytileDiff25p200.hypo\_merged\_CHG.Chr14.38124001-38124200  
mytileDiff25p200.hypo\_merged\_CHG.Chr14.39033601-39033800  
mytileDiff25p200.hypo\_merged\_CHG.Chr14.39033401-39033600



mytileDiff25p200.hypo\_merged\_CHG.Chr14.39033001-39033200  
mytileDiff25p200.hypo\_CpG.Chr14.39033601-39033800  
mytileDiff25p200.hypo\_merged\_CHG.Chr14.39890401-39890600  
mytileDiff25p200.hypo\_merged\_CHG.Chr14.39890001-39890200  
mytileDiff25p200.hypo\_merged\_CHG.Chr14.39911601-39911800  
mytileDiff25p200.hypo\_merged\_CHG.Chr14.40433601-40433800  
mytileDiff25p200.hypo\_merged\_CHG.Chr14.40433401-40433600  
mytileDiff25p200.hypo\_merged\_CHG.Chr14.41252601-41252800  
mytileDiff25p200.hypo\_CpG.Chr14.42143001-42143200  
mytileDiff25p200.hypo\_CpG.Chr14.42142801-42143000  
mytileDiff25p200.hypo\_merged\_CHH.Chr14.42387001-42387200  
mytileDiff25p200.hypo\_merged\_CHH.Chr14.44030601-44030800  
mytileDiff25p200.hypo\_CpG.Chr14.44038801-44039000  
mytileDiff25p200.hypo\_CpG.Chr14.44062601-44062800  
mytileDiff25p200.hypo\_CpG.Chr14.44705601-44705800  
mytileDiff25p200.hypo\_CpG.Chr14.45153401-45153600  
mytileDiff25p200.hypo\_CpG.Chr14.45516401-45516600  
mytileDiff25p200.hypo\_CpG.Chr14.45537401-45537600  
mytileDiff25p200.hypo\_CpG.Chr14.45572601-45572800  
mytileDiff25p200.hypo\_merged\_CHG.Chr14.45740601-45740800  
mytileDiff25p200.hypo\_merged\_CHH.Chr14.46480401-46480600  
mytileDiff25p200.hypo\_CpG.Chr14.46557401-46557600  
mytileDiff25p200.hypo\_merged\_CHH.Chr14.46583201-46583400  
mytileDiff25p200.hypo\_merged\_CHG.Chr14.46583001-46583200  
mytileDiff25p200.hypo\_CpG.Chr14.46888801-46889000  
mytileDiff25p200.hypo\_merged\_CHG.Chr14.47667201-47667400  
mytileDiff25p200.hypo\_CpG.Chr14.48743401-48743600  
mytileDiff25p200.hypo\_merged\_CHH.Chr15.109201-109400  
mytileDiff25p200.hypo\_merged\_CHG.Chr15.570401-570600  
mytileDiff25p200.hypo\_CpG.Chr15.1198601-1198800  
mytileDiff25p200.hypo\_CpG.Chr15.1332201-1332400  
mytileDiff25p200.hypo\_CpG.Chr15.1908201-1908400  
mytileDiff25p200.hypo\_CpG.Chr15.2098401-2098600  
mytileDiff25p200.hypo\_merged\_CHH.Chr15.2098401-2098600  
mytileDiff25p200.hypo\_merged\_CHG.Chr15.2436201-2436400  
mytileDiff25p200.hypo\_merged\_CHH.Chr15.2455801-2456000  
mytileDiff25p200.hypo\_merged\_CHH.Chr15.2823601-2823800  
mytileDiff25p200.hypo\_CpG.Chr15.3166401-3166600  
mytileDiff25p200.hypo\_merged\_CHH.Chr15.3726201-3726400  
mytileDiff25p200.hypo\_merged\_CHG.Chr15.3726201-3726400  
mytileDiff25p200.hypo\_CpG.Chr15.4391001-4391200  
mytileDiff25p200.hypo\_CpG.Chr15.4391001-4391200  
mytileDiff25p200.hypo\_merged\_CHH.Chr15.4475601-4475800  
mytileDiff25p200.hypo\_CpG.Chr15.4534601-4534800

mytileDiff25p20.hypo\_merged\_CHH.Chr15.4548401-4548600  
mytileDiff25p20.hypo\_merged\_CHH.Chr15.5465201-5465400  
mytileDiff25p20.hypo\_CpG.Chr15.5663001-5663200  
mytileDiff25p20.hypo\_merged\_CHG.Chr15.5876601-5876800  
mytileDiff25p20.hypo\_CpG.Chr15.6742201-6742400  
mytileDiff25p20.hypo\_CpG.Chr15.7537201-7537400  
mytileDiff25p20.hypo\_CpG.Chr15.7629801-7630000  
mytileDiff25p20.hypo\_CpG.Chr15.8439801-8440000  
mytileDiff25p20.hypo\_CpG.Chr15.9131601-9131800  
mytileDiff25p20.hypo\_CpG.Chr15.9964401-9964600  
mytileDiff25p20.hypo\_merged\_CHG.Chr15.9986001-9986200  
mytileDiff25p20.hypo\_CpG.Chr15.9986001-9986200  
mytileDiff25p20.hypo\_merged\_CHG.Chr15.9986401-9986600  
mytileDiff25p20.hypo\_CpG.Chr15.9986201-9986400  
mytileDiff25p20.hypo\_merged\_CHG.Chr15.10092401-10092600  
mytileDiff25p20.hypo\_merged\_CHG.Chr15.10886801-10887000  
mytileDiff25p20.hypo\_merged\_CHH.Chr15.11267201-11267400  
mytileDiff25p20.hypo\_merged\_CHH.Chr15.11975401-11975600  
mytileDiff25p20.hypo\_CpG.Chr15.12857401-12857600  
mytileDiff25p20.hypo\_merged\_CHG.Chr15.13756001-13756200  
mytileDiff25p20.hypo\_merged\_CHG.Chr15.14010601-14010800  
mytileDiff25p20.hypo\_merged\_CHH.Chr15.14345001-14345200  
mytileDiff25p20.hypo\_merged\_CHH.Chr15.15810601-15810800  
mytileDiff25p20.hypo\_CpG.Chr15.15899001-15899200  
mytileDiff25p20.hypo\_merged\_CHG.Chr15.16036801-16037000  
mytileDiff25p20.hypo\_CpG.Chr15.16556801-16557000  
mytileDiff25p20.hypo\_CpG.Chr15.16556801-16557000  
mytileDiff25p20.hypo\_CpG.Chr15.17553401-17553600  
mytileDiff25p20.hypo\_merged\_CHG.Chr15.17769001-17769200  
mytileDiff25p20.hypo\_merged\_CHG.Chr15.17768801-17769000  
mytileDiff25p20.hypo\_merged\_CHG.Chr15.17768601-17768800  
mytileDiff25p20.hypo\_merged\_CHG.Chr15.17768201-17768400  
mytileDiff25p20.hypo\_CpG.Chr15.17768601-17768800  
mytileDiff25p20.hypo\_CpG.Chr15.17768201-17768400  
mytileDiff25p20.hypo\_CpG.Chr15.17768001-17768200  
mytileDiff25p20.hypo\_merged\_CHG.Chr15.20914601-20914800  
mytileDiff25p20.hypo\_merged\_CHG.Chr15.20910601-20910800  
mytileDiff25p20.hypo\_merged\_CHH.Chr15.21084001-21084200  
mytileDiff25p20.hypo\_merged\_CHH.Chr15.21261401-21261600  
mytileDiff25p20.hypo\_CpG.Chr15.21489201-21489400  
mytileDiff25p20.hypo\_CpG.Chr15.22867201-22867400  
mytileDiff25p20.hypo\_CpG.Chr15.22867401-22867600  
mytileDiff25p20.hypo\_CpG.Chr15.22867601-22867800  
mytileDiff25p20.hypo\_merged\_CHG.Chr15.22867401-22867600

mytileDiff25p200.hypo\_CpG.Chr15.23418001-23418200  
mytileDiff25p200.hypo\_CpG.Chr15.27208601-27208800  
mytileDiff25p200.hypo\_merged\_CHG.Chr15.27255601-27255800  
mytileDiff25p200.hypo\_merged\_CHG.Chr15.27254601-27254800  
mytileDiff25p200.hypo\_merged\_CHG.Chr15.27254401-27254600  
mytileDiff25p200.hypo\_merged\_CHG.Chr15.27253601-27253800  
mytileDiff25p200.hypo\_merged\_CHG.Chr15.27282001-27282200  
mytileDiff25p200.hypo\_CpG.Chr15.31267401-31267600  
mytileDiff25p200.hypo\_merged\_CHG.Chr15.32959201-32959400  
mytileDiff25p200.hypo\_CpG.Chr15.33439201-33439400  
mytileDiff25p200.hypo\_CpG.Chr15.33461001-33461200  
mytileDiff25p200.hypo\_merged\_CHG.Chr15.33543001-33543200  
mytileDiff25p200.hypo\_merged\_CHG.Chr15.33542801-33543000  
mytileDiff25p200.hypo\_merged\_CHG.Chr15.33613001-33613200  
mytileDiff25p200.hypo\_merged\_CHH.Chr15.34501801-34502000  
mytileDiff25p200.hypo\_CpG.Chr15.35276401-35276600  
mytileDiff25p200.hypo\_merged\_CHG.Chr15.38033801-38034000  
mytileDiff25p200.hypo\_merged\_CHG.Chr15.39930401-39930600  
mytileDiff25p200.hypo\_merged\_CHG.Chr15.41549401-41549600  
mytileDiff25p200.hypo\_CpG.Chr15.43721001-43721200  
mytileDiff25p200.hypo\_merged\_CHH.Chr15.44258001-44258200  
mytileDiff25p200.hypo\_CpG.Chr15.44358801-44359000  
mytileDiff25p200.hypo\_CpG.Chr15.45520201-45520400  
mytileDiff25p200.hypo\_CpG.Chr15.45520401-45520600  
mytileDiff25p200.hypo\_merged\_CHG.Chr15.45520401-45520600  
mytileDiff25p200.hypo\_merged\_CHG.Chr15.46684801-46685000  
mytileDiff25p200.hypo\_merged\_CHG.Chr15.46684601-46684800  
mytileDiff25p200.hypo\_merged\_CHG.Chr15.46684401-46684600  
mytileDiff25p200.hypo\_CpG.Chr15.46684801-46685000  
mytileDiff25p200.hypo\_CpG.Chr15.46684601-46684800  
mytileDiff25p200.hypo\_CpG.Chr15.46684401-46684600  
mytileDiff25p200.hypo\_merged\_CHG.Chr15.46744801-46745000  
mytileDiff25p200.hypo\_merged\_CHH.Chr15.46974401-46974600  
mytileDiff25p200.hypo\_merged\_CHG.Chr15.47407201-47407400  
mytileDiff25p200.hypo\_CpG.Chr15.47407201-47407400  
mytileDiff25p200.hypo\_merged\_CHH.Chr15.47445601-47445800  
mytileDiff25p200.hypo\_merged\_CHG.Chr15.48068401-48068600  
mytileDiff25p200.hypo\_CpG.Chr15.48310601-48310800  
mytileDiff25p200.hypo\_merged\_CHH.Chr15.48443401-48443600  
mytileDiff25p200.hypo\_merged\_CHH.Chr15.48513401-48513600  
mytileDiff25p200.hypo\_CpG.Chr15.48522601-48522800  
mytileDiff25p200.hypo\_CpG.Chr15.50908001-50908200  
mytileDiff25p200.hypo\_CpG.Chr15.51108001-51108200  
mytileDiff25p200.hypo\_CpG.Chr15.51160401-51160600

mytileDiff25p200.hypo\_CpG.Chr16.323601-323800  
mytileDiff25p200.hypo\_CpG.Chr16.574201-574400  
mytileDiff25p200.hypo\_CpG.Chr16.850001-850200  
mytileDiff25p200.hypo\_CpG.Chr16.1254001-1254200  
mytileDiff25p200.hypo\_CpG.Chr16.1621001-1621200  
mytileDiff25p200.hypo\_CpG.Chr16.2459801-2460000  
mytileDiff25p200.hypo\_CpG.Chr16.3743801-3744000  
mytileDiff25p200.hypo\_CpG.Chr16.3743601-3743800  
mytileDiff25p200.hypo\_CpG.Chr16.3841401-3841600  
mytileDiff25p200.hypo\_merged\_CHH.Chr16.3874801-3875000  
mytileDiff25p200.hypo\_CpG.Chr16.4766201-4766400  
mytileDiff25p200.hypo\_CpG.Chr16.5087401-5087600  
mytileDiff25p200.hypo\_merged\_CHG.Chr16.5146001-5146200  
mytileDiff25p200.hypo\_merged\_CHG.Chr16.5564201-5564400  
mytileDiff25p200.hypo\_CpG.Chr16.5630001-5630200  
mytileDiff25p200.hypo\_merged\_CHG.Chr16.5674201-5674400  
mytileDiff25p200.hypo\_merged\_CHG.Chr16.6638801-6639000  
mytileDiff25p200.hypo\_CpG.Chr16.6638801-6639000  
mytileDiff25p200.hypo\_merged\_CHH.Chr16.6684201-6684400  
mytileDiff25p200.hypo\_CpG.Chr16.6916601-6916800  
mytileDiff25p200.hypo\_CpG.Chr16.7179401-7179600  
mytileDiff25p200.hypo\_merged\_CHG.Chr16.7443201-7443400  
mytileDiff25p200.hypo\_CpG.Chr16.7949401-7949600  
mytileDiff25p200.hypo\_merged\_CHH.Chr16.8083801-8084000  
mytileDiff25p200.hypo\_CpG.Chr16.10645401-10645600  
mytileDiff25p200.hypo\_merged\_CHG.Chr16.11152001-11152200  
mytileDiff25p200.hypo\_merged\_CHH.Chr16.11237201-11237400  
mytileDiff25p200.hypo\_merged\_CHH.Chr16.11237201-11237400  
mytileDiff25p200.hypo\_merged\_CHG.Chr16.14216201-14216400  
mytileDiff25p200.hypo\_merged\_CHG.Chr16.14809001-14809200  
mytileDiff25p200.hypo\_CpG.Chr16.16980401-16980600  
mytileDiff25p200.hypo\_CpG.Chr16.20492201-20492400  
mytileDiff25p200.hypo\_merged\_CHH.Chr16.24732401-24732600  
mytileDiff25p200.hypo\_merged\_CHG.Chr16.25033001-25033200  
mytileDiff25p200.hypo\_CpG.Chr16.25033001-25033200  
mytileDiff25p200.hypo\_merged\_CHG.Chr16.25197801-25198000  
mytileDiff25p200.hypo\_merged\_CHG.Chr16.25316401-25316600  
mytileDiff25p200.hypo\_merged\_CHG.Chr16.25583401-25583600  
mytileDiff25p200.hypo\_merged\_CHG.Chr16.25583401-25583600  
mytileDiff25p200.hypo\_merged\_CHG.Chr16.25676401-25676600  
mytileDiff25p200.hypo\_merged\_CHG.Chr16.25675401-25675600  
mytileDiff25p200.hypo\_merged\_CHH.Chr16.28009401-28009600  
mytileDiff25p200.hypo\_CpG.Chr16.28033601-28033800  
mytileDiff25p200.hypo\_CpG.Chr16.28060601-28060800

mytileDiff25p200.hypo\_merged\_CHG.Chr16.28527201-28527400  
mytileDiff25p200.hypo\_CpG.Chr16.29157601-29157800  
mytileDiff25p200.hypo\_CpG.Chr16.29250001-29250200  
mytileDiff25p200.hypo\_merged\_CHG.Chr16.29356001-29356200  
mytileDiff25p200.hypo\_CpG.Chr16.29536201-29536400  
mytileDiff25p200.hypo\_CpG.Chr16.29534801-29535000  
mytileDiff25p200.hypo\_CpG.Chr16.30021401-30021600  
mytileDiff25p200.hypo\_CpG.Chr16.30473001-30473200  
mytileDiff25p200.hypo\_CpG.Chr16.30775801-30776000  
mytileDiff25p200.hypo\_merged\_CHG.Chr16.30920001-30920200  
mytileDiff25p200.hypo\_CpG.Chr16.31442401-31442600  
mytileDiff25p200.hypo\_CpG.Chr16.31597801-31598000  
mytileDiff25p200.hypo\_CpG.Chr16.31933601-31933800  
mytileDiff25p200.hypo\_merged\_CHG.Chr16.31948401-31948600  
mytileDiff25p200.hypo\_merged\_CHG.Chr16.32362801-32363000  
mytileDiff25p200.hypo\_merged\_CHG.Chr16.33297001-33297200  
mytileDiff25p200.hypo\_merged\_CHG.Chr16.33315001-33315200  
mytileDiff25p200.hypo\_merged\_CHG.Chr16.34395001-34395200  
mytileDiff25p200.hypo\_merged\_CHG.Chr16.34503401-34503600  
mytileDiff25p200.hypo\_CpG.Chr16.34764001-34764200  
mytileDiff25p200.hypo\_CpG.Chr16.35222401-35222600  
mytileDiff25p200.hypo\_CpG.Chr16.35259601-35259800  
mytileDiff25p200.hypo\_merged\_CHH.Chr16.36374001-36374200  
mytileDiff25p200.hypo\_merged\_CHG.Chr17.98601-98800  
mytileDiff25p200.hypo\_CpG.Chr17.881801-882000  
mytileDiff25p200.hypo\_merged\_CHH.Chr17.1352801-1353000  
mytileDiff25p200.hypo\_CpG.Chr17.1753401-1753600  
mytileDiff25p200.hypo\_CpG.Chr17.1824801-1825000  
mytileDiff25p200.hypo\_merged\_CHH.Chr17.2058201-2058400  
mytileDiff25p200.hypo\_CpG.Chr17.2058001-2058200  
mytileDiff25p200.hypo\_CpG.Chr17.2459001-2459200  
mytileDiff25p200.hypo\_CpG.Chr17.2790801-2791000  
mytileDiff25p200.hypo\_CpG.Chr17.2927201-2927400  
mytileDiff25p200.hypo\_merged\_CHG.Chr17.3116201-3116400  
mytileDiff25p200.hypo\_CpG.Chr17.3284001-3284200  
mytileDiff25p200.hypo\_merged\_CHH.Chr17.3326801-3327000  
mytileDiff25p200.hypo\_merged\_CHH.Chr17.4341601-4341800  
mytileDiff25p200.hypo\_CpG.Chr17.4536201-4536400  
mytileDiff25p200.hypo\_merged\_CHH.Chr17.4576001-4576200  
mytileDiff25p200.hypo\_CpG.Chr17.4576201-4576400  
mytileDiff25p200.hypo\_CpG.Chr17.4756801-4757000  
mytileDiff25p200.hypo\_CpG.Chr17.6464601-6464800  
mytileDiff25p200.hypo\_CpG.Chr17.6491201-6491400  
mytileDiff25p200.hypo\_CpG.Chr17.6908601-6908800

mytileDiff25p200.hypo\_merged\_CHH.Chr17.7313001-7313200  
mytileDiff25p200.hypo\_merged\_CHH.Chr17.7312801-7313000  
mytileDiff25p200.hypo\_merged\_CHG.Chr17.7381401-7381600  
mytileDiff25p200.hypo\_CpG.Chr17.7376801-7377000  
mytileDiff25p200.hypo\_CpG.Chr17.7917801-7918000  
mytileDiff25p200.hypo\_CpG.Chr17.8289401-8289600  
mytileDiff25p200.hypo\_merged\_CHH.Chr17.9056601-9056800  
mytileDiff25p200.hypo\_merged\_CHH.Chr17.9375001-9375200  
mytileDiff25p200.hypo\_CpG.Chr17.10007001-10007200  
mytileDiff25p200.hypo\_CpG.Chr17.10351401-10351600  
mytileDiff25p200.hypo\_merged\_CHG.Chr17.10407401-10407600  
mytileDiff25p200.hypo\_CpG.Chr17.10407401-10407600  
mytileDiff25p200.hypo\_CpG.Chr17.11865801-11866000  
mytileDiff25p200.hypo\_CpG.Chr17.11951801-11952000  
mytileDiff25p200.hypo\_merged\_CHH.Chr17.11981401-11981600  
mytileDiff25p200.hypo\_merged\_CHG.Chr17.12464801-12465000  
mytileDiff25p200.hypo\_CpG.Chr17.13586001-13586200  
mytileDiff25p200.hypo\_CpG.Chr17.13969601-13969800  
mytileDiff25p200.hypo\_merged\_CHG.Chr17.15681601-15681800  
mytileDiff25p200.hypo\_merged\_CHG.Chr17.16417201-16417400  
mytileDiff25p200.hypo\_merged\_CHG.Chr17.16417001-16417200  
mytileDiff25p200.hypo\_merged\_CHG.Chr17.16416801-16417000  
mytileDiff25p200.hypo\_merged\_CHG.Chr17.16416001-16416200  
mytileDiff25p200.hypo\_merged\_CHG.Chr17.16418001-16418200  
mytileDiff25p200.hypo\_merged\_CHG.Chr17.16417801-16418000  
mytileDiff25p200.hypo\_CpG.Chr17.16432801-16433000  
mytileDiff25p200.hypo\_merged\_CHG.Chr17.17885201-17885400  
mytileDiff25p200.hypo\_CpG.Chr17.17898001-17898200  
mytileDiff25p200.hypo\_CpG.Chr17.17898201-17898400  
mytileDiff25p200.hypo\_CpG.Chr17.20925601-20925800  
mytileDiff25p200.hypo\_merged\_CHG.Chr17.22996401-22996600  
mytileDiff25p200.hypo\_CpG.Chr17.23454801-23455000  
mytileDiff25p200.hypo\_CpG.Chr17.23454401-23454600  
mytileDiff25p200.hypo\_CpG.Chr17.23453001-23453200  
mytileDiff25p200.hypo\_CpG.Chr17.23452801-23453000  
mytileDiff25p200.hypo\_CpG.Chr17.24794801-24795000  
mytileDiff25p200.hypo\_CpG.Chr17.26564001-26564200  
mytileDiff25p200.hypo\_merged\_CHG.Chr17.26564001-26564200  
mytileDiff25p200.hypo\_CpG.Chr17.27084601-27084800  
mytileDiff25p200.hypo\_CpG.Chr17.27299601-27299800  
mytileDiff25p200.hypo\_CpG.Chr17.27305801-27306000  
mytileDiff25p200.hypo\_merged\_CHG.Chr17.27305801-27306000  
mytileDiff25p200.hypo\_CpG.Chr17.31733201-31733400  
mytileDiff25p200.hypo\_CpG.Chr17.31841801-31842000

mytileDiff25p200.hypo\_CpG.Chr17.31947201-31947400  
mytileDiff25p200.hypo\_merged\_CHG.Chr17.32890401-32890600  
mytileDiff25p200.hypo\_CpG.Chr17.32892401-32892600  
mytileDiff25p200.hypo\_merged\_CHG.Chr17.33583001-33583200  
mytileDiff25p200.hypo\_merged\_CHG.Chr17.33583001-33583200  
mytileDiff25p200.hypo\_merged\_CHG.Chr17.33852001-33852200  
mytileDiff25p200.hypo\_merged\_CHG.Chr17.33995001-33995200  
mytileDiff25p200.hypo\_CpG.Chr17.34666401-34666600  
mytileDiff25p200.hypo\_CpG.Chr17.34666601-34666800  
mytileDiff25p200.hypo\_merged\_CHH.Chr17.35123401-35123600  
mytileDiff25p200.hypo\_merged\_CHG.Chr17.35206801-35207000  
mytileDiff25p200.hypo\_CpG.Chr17.35747001-35747200  
mytileDiff25p200.hypo\_CpG.Chr17.36335401-36335600  
mytileDiff25p200.hypo\_CpG.Chr17.37130001-37130200  
mytileDiff25p200.hypo\_CpG.Chr17.37300201-37300400  
mytileDiff25p200.hypo\_merged\_CHG.Chr17.37450801-37451000  
mytileDiff25p200.hypo\_merged\_CHG.Chr17.37498601-37498800  
mytileDiff25p200.hypo\_CpG.Chr17.38106001-38106200  
mytileDiff25p200.hypo\_merged\_CHG.Chr17.39053601-39053800  
mytileDiff25p200.hypo\_CpG.Chr17.39053601-39053800  
mytileDiff25p200.hypo\_merged\_CHG.Chr17.39054401-39054600  
mytileDiff25p200.hypo\_CpG.Chr17.40029201-40029400  
mytileDiff25p200.hypo\_merged\_CHH.Chr17.40092401-40092600  
mytileDiff25p200.hypo\_CpG.Chr17.40427001-40427200  
mytileDiff25p200.hypo\_CpG.Chr17.40514201-40514400  
mytileDiff25p200.hypo\_CpG.Chr17.40763801-40764000  
mytileDiff25p200.hypo\_CpG.Chr17.40948201-40948400  
mytileDiff25p200.hypo\_CpG.Chr17.41122201-41122400  
mytileDiff25p200.hypo\_merged\_CHH.Chr17.41294401-41294600  
mytileDiff25p200.hypo\_merged\_CHG.Chr18.13801-14000  
mytileDiff25p200.hypo\_merged\_CHG.Chr18.13601-13800  
mytileDiff25p200.hypo\_CpG.Chr18.312401-312600  
mytileDiff25p200.hypo\_merged\_CHG.Chr18.367801-368000  
mytileDiff25p200.hypo\_CpG.Chr18.367601-367800  
mytileDiff25p200.hypo\_CpG.Chr18.368201-368400  
mytileDiff25p200.hypo\_merged\_CHH.Chr18.662401-662600  
mytileDiff25p200.hypo\_CpG.Chr18.795801-796000  
mytileDiff25p200.hypo\_CpG.Chr18.793801-794000  
mytileDiff25p200.hypo\_merged\_CHH.Chr18.901801-902000  
mytileDiff25p200.hypo\_CpG.Chr18.940201-940400  
mytileDiff25p200.hypo\_CpG.Chr18.940001-940200  
mytileDiff25p200.hypo\_CpG.Chr18.1157001-1157200  
mytileDiff25p200.hypo\_merged\_CHG.Chr18.1447601-1447800  
mytileDiff25p200.hypo\_CpG.Chr18.2076801-2077000

mytileDiff25p200.hypo\_CpG.Chr18.2183401-2183600  
mytileDiff25p200.hypo\_CpG.Chr18.4854601-4854800  
mytileDiff25p200.hypo\_CpG.Chr18.5485201-5485400  
mytileDiff25p200.hypo\_CpG.Chr18.5903001-5903200  
mytileDiff25p200.hypo\_CpG.Chr18.6420201-6420400  
mytileDiff25p200.hypo\_merged\_CHH.Chr18.7997001-7997200  
mytileDiff25p200.hypo\_merged\_CHG.Chr18.8675601-8675800  
mytileDiff25p200.hypo\_CpG.Chr18.9494201-9494400  
mytileDiff25p200.hypo\_CpG.Chr18.9493601-9493800  
mytileDiff25p200.hypo\_merged\_CHG.Chr18.9501001-9501200  
mytileDiff25p200.hypo\_CpG.Chr18.9501001-9501200  
mytileDiff25p200.hypo\_merged\_CHH.Chr18.10454801-10455000  
mytileDiff25p200.hypo\_CpG.Chr18.12258401-12258600  
mytileDiff25p200.hypo\_merged\_CHG.Chr18.12632201-12632400  
mytileDiff25p200.hypo\_merged\_CHG.Chr18.12632001-12632200  
mytileDiff25p200.hypo\_CpG.Chr18.13325601-13325800  
mytileDiff25p200.hypo\_merged\_CHH.Chr18.14110401-14110600  
mytileDiff25p200.hypo\_merged\_CHG.Chr18.14750401-14750600  
mytileDiff25p200.hypo\_merged\_CHH.Chr18.16372001-16372200  
mytileDiff25p200.hypo\_merged\_CHG.Chr18.17155201-17155400  
mytileDiff25p200.hypo\_merged\_CHG.Chr18.17413801-17414000  
mytileDiff25p200.hypo\_CpG.Chr18.18325601-18325800  
mytileDiff25p200.hypo\_merged\_CHH.Chr18.19036001-19036200  
mytileDiff25p200.hypo\_merged\_CHG.Chr18.20283401-20283600  
mytileDiff25p200.hypo\_merged\_CHG.Chr18.21363201-21363400  
mytileDiff25p200.hypo\_merged\_CHG.Chr18.21363001-21363200  
mytileDiff25p200.hypo\_merged\_CHG.Chr18.22413601-22413800  
mytileDiff25p200.hypo\_CpG.Chr18.24848001-24848200  
mytileDiff25p200.hypo\_merged\_CHH.Chr18.25241801-25242000  
mytileDiff25p200.hypo\_merged\_CHG.Chr18.26910001-26910200  
mytileDiff25p200.hypo\_merged\_CHG.Chr18.26891001-26891200  
mytileDiff25p200.hypo\_CpG.Chr18.31581001-31581200  
mytileDiff25p200.hypo\_merged\_CHG.Chr18.34248601-34248800  
mytileDiff25p200.hypo\_merged\_CHG.Chr18.35100001-35100200  
mytileDiff25p200.hypo\_CpG.Chr18.36070001-36070200  
mytileDiff25p200.hypo\_merged\_CHG.Chr18.37022001-37022200  
mytileDiff25p200.hypo\_merged\_CHG.Chr18.38962601-38962800  
mytileDiff25p200.hypo\_merged\_CHG.Chr18.38961801-38962000  
mytileDiff25p200.hypo\_CpG.Chr18.38962601-38962800  
mytileDiff25p200.hypo\_CpG.Chr18.39266201-39266400  
mytileDiff25p200.hypo\_CpG.Chr18.40099001-40099200  
mytileDiff25p200.hypo\_merged\_CHG.Chr18.40503601-40503800  
mytileDiff25p200.hypo\_CpG.Chr18.42093401-42093600  
mytileDiff25p200.hypo\_CpG.Chr18.42791801-42792000



mytileDiff25p200.hypo\_merged\_CHH.Chr18.43311801-43312000  
mytileDiff25p200.hypo\_CpG.Chr18.44965801-44966000  
mytileDiff25p200.hypo\_merged\_CHG.Chr18.46858801-46859000  
mytileDiff25p200.hypo\_CpG.Chr18.46858801-46859000  
mytileDiff25p200.hypo\_merged\_CHG.Chr18.47905601-47905800  
mytileDiff25p200.hypo\_CpG.Chr18.47905601-47905800  
mytileDiff25p200.hypo\_CpG.Chr18.49528001-49528200  
mytileDiff25p200.hypo\_merged\_CHH.Chr18.50402801-50403000  
mytileDiff25p200.hypo\_CpG.Chr18.50592401-50592600  
mytileDiff25p200.hypo\_CpG.Chr18.51908601-51908800  
mytileDiff25p200.hypo\_CpG.Chr18.52582001-52582200  
mytileDiff25p200.hypo\_CpG.Chr18.52600001-52600200  
mytileDiff25p200.hypo\_merged\_CHG.Chr18.53007401-53007600  
mytileDiff25p200.hypo\_merged\_CHG.Chr18.53007201-53007400  
mytileDiff25p200.hypo\_CpG.Chr18.53469201-53469400  
mytileDiff25p200.hypo\_CpG.Chr18.53835401-53835600  
mytileDiff25p200.hypo\_CpG.Chr18.53937201-53937400  
mytileDiff25p200.hypo\_CpG.Chr18.53971401-53971600  
mytileDiff25p200.hypo\_merged\_CHG.Chr18.56058001-56058200  
mytileDiff25p200.hypo\_CpG.Chr18.56129601-56129800  
mytileDiff25p200.hypo\_CpG.Chr18.56659001-56659200  
mytileDiff25p200.hypo\_CpG.Chr18.57315801-57316000  
mytileDiff25p200.hypo\_merged\_CHG.Chr18.57526801-57527000  
mytileDiff25p200.hypo\_CpG.Chr18.57517601-57517800  
mytileDiff25p200.hypo\_merged\_CHH.Chr18.57681801-57682000  
mytileDiff25p200.hypo\_CpG.Chr19.104001-104200  
mytileDiff25p200.hypo\_merged\_CHG.Chr19.300001-300200  
mytileDiff25p200.hypo\_merged\_CHH.Chr19.593201-593400  
mytileDiff25p200.hypo\_merged\_CHH.Chr19.1054401-1054600  
mytileDiff25p200.hypo\_CpG.Chr19.1166801-1167000  
mytileDiff25p200.hypo\_CpG.Chr19.1229201-1229400  
mytileDiff25p200.hypo\_CpG.Chr19.1620201-1620400  
mytileDiff25p200.hypo\_CpG.Chr19.2688601-2688800  
mytileDiff25p200.hypo\_merged\_CHG.Chr19.2910201-2910400  
mytileDiff25p200.hypo\_CpG.Chr19.3580601-3580800  
mytileDiff25p200.hypo\_CpG.Chr19.3595601-3595800  
mytileDiff25p200.hypo\_merged\_CHG.Chr19.3846201-3846400  
mytileDiff25p200.hypo\_CpG.Chr19.5792201-5792400  
mytileDiff25p200.hypo\_CpG.Chr19.5881401-5881600  
mytileDiff25p200.hypo\_merged\_CHG.Chr19.6403001-6403200  
mytileDiff25p200.hypo\_merged\_CHG.Chr19.6402801-6403000  
mytileDiff25p200.hypo\_CpG.Chr19.6402801-6403000  
mytileDiff25p200.hypo\_merged\_CHG.Chr19.6402601-6402800  
mytileDiff25p200.hypo\_merged\_CHG.Chr19.10309401-10309600

mytileDiff25p200.hypo\_merged\_CHG.Chr19.11634601-11634800  
mytileDiff25p200.hypo\_merged\_CHG.Chr19.12185601-12185800  
mytileDiff25p200.hypo\_merged\_CHG.Chr19.12185001-12185200  
mytileDiff25p200.hypo\_merged\_CHG.Chr19.12975201-12975400  
mytileDiff25p200.hypo\_merged\_CHG.Chr19.18377401-18377600  
mytileDiff25p200.hypo\_merged\_CHG.Chr19.18771801-18772000  
mytileDiff25p200.hypo\_CpG.Chr19.27529801-27530000  
mytileDiff25p200.hypo\_CpG.Chr19.27731801-27732000  
mytileDiff25p200.hypo\_CpG.Chr19.27763601-27763800  
mytileDiff25p200.hypo\_CpG.Chr19.30020801-30021000  
mytileDiff25p200.hypo\_CpG.Chr19.30800001-30800200  
mytileDiff25p200.hypo\_CpG.Chr19.33585801-33586000  
mytileDiff25p200.hypo\_CpG.Chr19.34185201-34185400  
mytileDiff25p200.hypo\_merged\_CHG.Chr19.35049001-35049200  
mytileDiff25p200.hypo\_merged\_CHG.Chr19.35359001-35359200  
mytileDiff25p200.hypo\_CpG.Chr19.37135801-37136000  
mytileDiff25p200.hypo\_merged\_CHH.Chr19.37379801-37380000  
mytileDiff25p200.hypo\_CpG.Chr19.37398401-37398600  
mytileDiff25p200.hypo\_merged\_CHG.Chr19.38193201-38193400  
mytileDiff25p200.hypo\_merged\_CHG.Chr19.38192801-38193000  
mytileDiff25p200.hypo\_merged\_CHH.Chr19.38288801-38289000  
mytileDiff25p200.hypo\_CpG.Chr19.40298201-40298400  
mytileDiff25p200.hypo\_CpG.Chr19.40978001-40978200  
mytileDiff25p200.hypo\_CpG.Chr19.41269001-41269200  
mytileDiff25p200.hypo\_CpG.Chr19.41655001-41655200  
mytileDiff25p200.hypo\_merged\_CHH.Chr19.41708401-41708600  
mytileDiff25p200.hypo\_CpG.Chr19.43148201-43148400  
mytileDiff25p200.hypo\_CpG.Chr19.43567801-43568000  
mytileDiff25p200.hypo\_CpG.Chr19.43591201-43591400  
mytileDiff25p200.hypo\_CpG.Chr19.43794201-43794400  
mytileDiff25p200.hypo\_CpG.Chr19.43837601-43837800  
mytileDiff25p200.hypo\_CpG.Chr19.43938601-43938800  
mytileDiff25p200.hypo\_CpG.Chr19.44265801-44266000  
mytileDiff25p200.hypo\_CpG.Chr19.44394401-44394600  
mytileDiff25p200.hypo\_merged\_CHH.Chr19.44439001-44439200  
mytileDiff25p200.hypo\_CpG.Chr19.44580801-44581000  
mytileDiff25p200.hypo\_CpG.Chr19.44580801-44581000  
mytileDiff25p200.hypo\_merged\_CHH.Chr19.44955401-44955600  
mytileDiff25p200.hypo\_CpG.Chr19.46324201-46324400  
mytileDiff25p200.hypo\_CpG.Chr19.46715801-46716000  
mytileDiff25p200.hypo\_CpG.Chr19.46981801-46982000  
mytileDiff25p200.hypo\_CpG.Chr19.47309401-47309600  
mytileDiff25p200.hypo\_merged\_CHH.Chr19.47619401-47619600  
mytileDiff25p200.hypo\_merged\_CHH.Chr19.47776201-47776400

mytileDiff25p20.hypo\_merged\_CHH.Chr19.48086401-48086600  
mytileDiff25p20.hypo\_CpG.Chr19.48772001-48772200  
mytileDiff25p20.hypo\_CpG.Chr19.48792201-48792400  
mytileDiff25p20.hypo\_merged\_CHG.Chr19.49349801-49350000  
mytileDiff25p20.hypo\_CpG.Chr19.49664601-49664800  
mytileDiff25p20.hypo\_CpG.Chr19.49723001-49723200  
mytileDiff25p20.hypo\_merged\_CHG.Chr19.49720801-49721000  
mytileDiff25p20.hypo\_merged\_CHH.Chr19.49743201-49743400  
mytileDiff25p20.hypo\_merged\_CHH.Chr19.49743201-49743400  
mytileDiff25p20.hypo\_merged\_CHH.Chr19.49835001-49835200  
mytileDiff25p20.hypo\_CpG.Chr19.50052001-50052200  
mytileDiff25p20.hypo\_CpG.Chr19.50289001-50289200  
mytileDiff25p20.hypo\_merged\_CHG.Chr20.67401-67600  
mytileDiff25p20.hypo\_merged\_CHH.Chr20.482601-482800  
mytileDiff25p20.hypo\_merged\_CHG.Chr20.744401-744600  
mytileDiff25p20.hypo\_merged\_CHH.Chr20.902201-902400  
mytileDiff25p20.hypo\_CpG.Chr20.1188401-1188600  
mytileDiff25p20.hypo\_CpG.Chr20.1707001-1707200  
mytileDiff25p20.hypo\_merged\_CHH.Chr20.2640601-2640800  
mytileDiff25p20.hypo\_CpG.Chr20.2723001-2723200  
mytileDiff25p20.hypo\_CpG.Chr20.3111801-3112000  
mytileDiff25p20.hypo\_merged\_CHH.Chr20.3140601-3140800  
mytileDiff25p20.hypo\_merged\_CHH.Chr20.3753601-3753800  
mytileDiff25p20.hypo\_merged\_CHG.Chr20.4143401-4143600  
mytileDiff25p20.hypo\_CpG.Chr20.7200001-7200200  
mytileDiff25p20.hypo\_merged\_CHG.Chr20.8633801-8634000  
mytileDiff25p20.hypo\_CpG.Chr20.8996201-8996400  
mytileDiff25p20.hypo\_CpG.Chr20.8996201-8996400  
mytileDiff25p20.hypo\_CpG.Chr20.12626601-12626800  
mytileDiff25p20.hypo\_CpG.Chr20.14774801-14775000  
mytileDiff25p20.hypo\_merged\_CHG.Chr20.17716601-17716800  
mytileDiff25p20.hypo\_merged\_CHG.Chr20.17716601-17716800  
mytileDiff25p20.hypo\_CpG.Chr20.18662401-18662600  
mytileDiff25p20.hypo\_merged\_CHG.Chr20.21543201-21543400  
mytileDiff25p20.hypo\_merged\_CHG.Chr20.25169801-25170000  
mytileDiff25p20.hypo\_merged\_CHG.Chr20.25316801-25317000  
mytileDiff25p20.hypo\_CpG.Chr20.29609801-29610000  
mytileDiff25p20.hypo\_CpG.Chr20.29609801-29610000  
mytileDiff25p20.hypo\_CpG.Chr20.32245201-32245400  
mytileDiff25p20.hypo\_merged\_CHH.Chr20.33784801-33785000  
mytileDiff25p20.hypo\_merged\_CHH.Chr20.34654401-34654600  
mytileDiff25p20.hypo\_merged\_CHH.Chr20.34654401-34654600  
mytileDiff25p20.hypo\_CpG.Chr20.35028801-35029000  
mytileDiff25p20.hypo\_CpG.Chr20.35283001-35283200

mytileDiff25p200.hypo\_CpG.Chr20.35426801-35427000  
mytileDiff25p200.hypo\_CpG.Chr20.35944201-35944400  
mytileDiff25p200.hypo\_merged\_CHH.Chr20.36082801-36083000  
mytileDiff25p200.hypo\_CpG.Chr20.36315801-36316000  
mytileDiff25p200.hypo\_CpG.Chr20.37153201-37153400  
mytileDiff25p200.hypo\_CpG.Chr20.37189801-37190000  
mytileDiff25p200.hypo\_merged\_CHG.Chr20.37567401-37567600  
mytileDiff25p200.hypo\_merged\_CHH.Chr20.37906801-37907000  
mytileDiff25p200.hypo\_CpG.Chr20.38506001-38506200  
mytileDiff25p200.hypo\_CpG.Chr20.38780001-38780200  
mytileDiff25p200.hypo\_CpG.Chr20.38793201-38793400  
mytileDiff25p200.hypo\_CpG.Chr20.39251801-39252000  
mytileDiff25p200.hypo\_CpG.Chr20.39328401-39328600  
mytileDiff25p200.hypo\_CpG.Chr20.39992201-39992400  
mytileDiff25p200.hypo\_CpG.Chr20.40297201-40297400  
mytileDiff25p200.hypo\_CpG.Chr20.40365201-40365400  
mytileDiff25p200.hypo\_CpG.Chr20.41091001-41091200  
mytileDiff25p200.hypo\_merged\_CHH.Chr20.41604401-41604600  
mytileDiff25p200.hypo\_merged\_CHH.Chr20.42106401-42106600  
mytileDiff25p200.hypo\_merged\_CHG.Chr20.42417801-42418000  
mytileDiff25p200.hypo\_merged\_CHG.Chr20.42417001-42417200  
mytileDiff25p200.hypo\_merged\_CHG.Chr20.42416801-42417000  
mytileDiff25p200.hypo\_CpG.Chr20.42417001-42417200  
mytileDiff25p200.hypo\_CpG.Chr20.42417801-42418000  
mytileDiff25p200.hypo\_CpG.Chr20.42441401-42441600  
mytileDiff25p200.hypo\_CpG.Chr20.42639601-42639800  
mytileDiff25p200.hypo\_CpG.Chr20.42840201-42840400  
mytileDiff25p200.hypo\_CpG.Chr20.43404601-43404800  
mytileDiff25p200.hypo\_merged\_CHH.Chr20.43644001-43644200  
mytileDiff25p200.hypo\_merged\_CHG.Chr20.43723401-43723600  
mytileDiff25p200.hypo\_CpG.Chr20.44505401-44505600  
mytileDiff25p200.hypo\_CpG.Chr20.45270801-45271000  
mytileDiff25p200.hypo\_CpG.Chr20.45355801-45356000  
mytileDiff25p200.hypo\_CpG.Chr20.45478001-45478200  
mytileDiff25p200.hypo\_CpG.Chr20.46646601-46646800  
mytileDiff25p200.hypo\_merged\_CHH.Chr20.46804801-46805000  
mytileDiff25p200.hypo\_merged\_CHH.Chr20.47264001-47264200  
mytileDiff25p200.hypo\_CpG.Chr20.47470601-47470800  
mytileDiff25p200.hypo\_merged\_CHG.Chr20.47739201-47739400  
mytileDiff25p200.hypo\_CpG.scaffold\_21.276801-277000  
mytileDiff25p200.hypo\_merged\_CHG.scaffold\_21.349201-349400  
mytileDiff25p200.hypo\_CpG.scaffold\_21.1291801-1292000  
mytileDiff25p200.hypo\_merged\_CHH.scaffold\_223.13001-13200  
mytileDiff25p200.hypo\_CpG.scaffold\_31.213601-213800

mytileDiff25p200.hypo\_CpG.scaffold\_31.258401-258600  
mytileDiff25p200.hypo\_merged\_CHH.scaffold\_31.263201-263400  
mytileDiff25p200.hypo\_CpG.scaffold\_32.168401-168600  
mytileDiff25p200.hypo\_merged\_CHH.scaffold\_32.247601-247800  
mytileDiff25p200.hypo\_CpG.scaffold\_32.247601-247800  
mytileDiff25p200.hypo\_merged\_CHH.scaffold\_361.3401-3600

---

**es in all sequence contexts.**

| <b>REGION</b>                          | <b>GENE ID</b>  |
|----------------------------------------|-----------------|
| 3'UTR                                  | Glyma.01G005200 |
| 3'UTR (38bp)                           | Glyma.01G006800 |
| 3'UTR (160bp)                          | Glyma.01G007300 |
| GENE BODY                              | Glyma.01G007300 |
| 3'UTR                                  | Glyma.01G021600 |
| 3'UTR                                  | Glyma.01G021600 |
| 3'UTR                                  | Glyma.01G021600 |
| PROMOTER                               | Glyma.01G022300 |
| GENE BODY                              | Glyma.01G023600 |
| GENE BODY                              | Glyma.01G023700 |
| PROMOTER                               | Glyma.01G038200 |
| GENE BODY                              | Glyma.01G038300 |
| PROMOTER                               | Glyma.01G038600 |
| GENE BODY                              | Glyma.01G038700 |
| GENE BODY                              | Glyma.01G044000 |
| GENE BODY                              | Glyma.01G059100 |
| GENE BODY                              | Glyma.01G063700 |
| GENE BODY                              | Glyma.01G065600 |
| GENE BODY                              | Glyma.01G074400 |
| GENE BODY                              | Glyma.01G074400 |
| GENE BODY                              | Glyma.01G074400 |
| GENE BODY                              | Glyma.01G074500 |
| GENE BODY                              | Glyma.01G074700 |
| 3'UTR                                  | Glyma.01G076200 |
| 5'UTR(108bp); PROMOTER (92bp)          | Glyma.01G089000 |
| 5'UTR(108bp); PROMOTER(92bp)           | Glyma.01G089000 |
| 5'UTR(171bp); GENE BODY (29bp)         | Glyma.01G089000 |
| 5'UTR(171bp); GENE BODY(29bp)          | Glyma.01G089000 |
| 5'UTR(60bp); GENE BODY(140 bp)         | Glyma.01G089000 |
| 5'UTR(128bp); PROMOTER(72bp)           | Glyma.01G089600 |
| GENE BODY                              | Glyma.01G093200 |
| GENE BODY                              | Glyma.01G093900 |
| GENE BODY                              | Glyma.01G095100 |
| GENE BODY                              | Glyma.01G102100 |
| GENE BODY                              | Glyma.01G102800 |
| 5' UTR                                 | Glyma.01G114500 |
| 5' UTR                                 | Glyma.01G114500 |
| 5'UTR                                  | Glyma.01G114500 |
| PROMOTER(60bp); 5'UTR(39bp); GENE BODY | Glyma.01G117400 |
| GENE BODY                              | Glyma.01G117500 |
| GENE BODY                              | Glyma.01G117500 |
| PROMOTER                               | Glyma.01G120100 |

|                                    |                 |
|------------------------------------|-----------------|
| PROMOTER                           | Glyma.01G120100 |
| PROMOTER                           | Glyma.01G120100 |
| PROMOTER                           | Glyma.01G120100 |
| GENE BODY                          | Glyma.01G134300 |
| GENE BODY                          | Glyma.01G134300 |
| GENE BODY (102bp); 3'UTR(98bp)     | Glyma.01G135400 |
| GENE BODY                          | Glyma.01G135900 |
| GENE BODY                          | Glyma.01G140200 |
| GENE BODY                          | Glyma.01G141900 |
| 5'UTR(148bp); GENE BODY(52bp)      | Glyma.01G145600 |
| GENE BODY                          | Glyma.01G145600 |
| GENE BODY                          | Glyma.01G145600 |
| GENE BODY (117bp); PROMOTER (83bp) | Glyma.01G145700 |
| PROMOTER                           | Glyma.01G145700 |
| PROMOTER                           | Glyma.01G145700 |
| PROMOTER                           | Glyma.01G145800 |
| PROMOTER                           | Glyma.01G153600 |
| PROMOTER                           | Glyma.01G153600 |
| 5'UTR(100bp); GENE BODY(100bp)     | Glyma.01G156800 |
| PROMOTER                           | Glyma.01G156800 |
| GENE BODY                          | Glyma.01G162200 |
| GENE BODY                          | Glyma.01G166100 |
| PROMOTER                           | Glyma.01G166400 |
| GENE BODY                          | Glyma.01G168400 |
| GENE BODY                          | Glyma.01G168400 |
| GENE BODY                          | Glyma.01G168900 |
| GENE BODY                          | Glyma.01G176400 |
| GENE BODY                          | Glyma.01G184500 |
| PROMOTER                           | Glyma.01G190400 |
| PROMOTER                           | Glyma.01G201000 |
| GENE BODY                          | Glyma.01G203000 |
| GENE BODY                          | Glyma.01G204900 |
| GENE BODY                          | Glyma.01G209300 |
| 5'UTR (33bp); PROMOTER (167bp)     | Glyma.01G226000 |
| GENE BODY                          | Glyma.01G226800 |
| GENE BODY                          | Glyma.01G234300 |
| GENE BODY                          | Glyma.01G235300 |
| GENE BODY                          | Glyma.01G238200 |
| 3'UTR(31bp); GENE BODY (169bp)     | Glyma.01G243200 |
| GENE BODY (169bp); 3'UTR (31bp)    | Glyma.01G243200 |
| GENE BODY (169bp); 3'UTR(31bp)     | Glyma.01G243200 |
| 3'UTR(65bp)                        | Glyma.01G245100 |

|                                    |                 |
|------------------------------------|-----------------|
| PROMOTER (167bp); GENE BODY (33bp) | Glyma.01G245200 |
| GENE BODY                          | Glyma.02G003600 |
| GENE BODY                          | Glyma.02G006500 |
| 3'UTR(58bp)                        | Glyma.02G012600 |
| GENE BODY                          | Glyma.02G021900 |
| GENE BODY                          | Glyma.02G027500 |
| GENE BODY                          | Glyma.02G042000 |
| GENE BODY                          | Glyma.02G048100 |
| GENE BODY                          | Glyma.02G056800 |
| GENE BODY                          | Glyma.02G062200 |
| GENE BODY                          | Glyma.02G066700 |
| GENE BODY                          | Glyma.02G067100 |
| PROMOTER                           | Glyma.02G085500 |
| GENE BODY                          | Glyma.02G089000 |
| GENE BODY                          | Glyma.02G090400 |
| GENE BODY                          | Glyma.02G091300 |
| 3'UTR(3bp); GENE BODY (197bp)      | Glyma.02G098100 |
| GENE BODY                          | Glyma.02G098200 |
| GENE BODY                          | Glyma.02G099300 |
| GENE BODY                          | Glyma.02G100200 |
| PROMOTER                           | Glyma.02G102900 |
| GENE BODY                          | Glyma.02G103100 |
| GENE BODY                          | Glyma.02G103100 |
| GENE BODY                          | Glyma.02G106100 |
| GENE BODY                          | Glyma.02G112500 |
| PROMOTER                           | Glyma.02G116700 |
| PROMOTER                           | Glyma.02G117700 |
| PROMOTER                           | Glyma.02G129400 |
| PROMOTER                           | Glyma.02G129400 |
| PROMOTER                           | Glyma.02G129400 |
| GENE BODY                          | Glyma.02G135900 |
| PROMOTER                           | Glyma.02G138900 |
| PROMOTER                           | Glyma.02G138900 |
| PROMOTER                           | Glyma.02G138900 |
| 5'UTR(110bp); GENE BODY (90bp)     | Glyma.02G139000 |
| 5'UTR(141bp); PROMOTER (59bp)      | Glyma.02G139000 |
| 5'UTR(141bp); PROMOTER (59bp)      | Glyma.02G139000 |
| 3'UTR                              | Glyma.02G140700 |
| GENE BODY                          | Glyma.02G141600 |
| PROMOTER                           | Glyma.02G141900 |
| PROMOTER                           | Glyma.02G141900 |
| GENE BODY                          | Glyma.02G145300 |
| GENE BODY                          | Glyma.02G159400 |
| GENE BODY                          | Glyma.02G160400 |



|                                   |                 |
|-----------------------------------|-----------------|
| GENE BODY                         | Glyma.02G161100 |
| GENE BODY                         | Glyma.02G162900 |
| GENE BODY                         | Glyma.02G163200 |
| GENE BODY                         | Glyma.02G166500 |
| PROMOTER(148bp); GENE BODY(52bp)  | Glyma.02G168200 |
| GENE BODY                         | Glyma.02G170200 |
| GENE BODY                         | Glyma.02G170500 |
| GENE BODY                         | Glyma.02G172600 |
| GENE BODY                         | Glyma.02G177900 |
| GENE BODY(100bp); PROMOTER(100bp) | Glyma.02G180800 |
| GENE BODY                         | Glyma.02G184100 |
| GENE BODY                         | Glyma.02G185900 |
| GENE BODY                         | Glyma.02G186300 |
| GENE BODY                         | Glyma.02G189600 |
| PROMOTER                          | Glyma.02G190300 |
| 5'UTR(135bp); GENE BODY (65bp)    | Glyma.02G192300 |
| 5' UTR                            | Glyma.02G197100 |
| GENE BODY                         | Glyma.02G201600 |
| PROMOTER                          | Glyma.02G201800 |
| GENE BODY                         | Glyma.02G202300 |
| GENE BODY                         | Glyma.02G215800 |
| GENE BODY                         | Glyma.02G218100 |
| GENE BODY                         | Glyma.02G219600 |
| PROMOTER                          | Glyma.02G221500 |
| GENE BODY                         | Glyma.02G228000 |
| PROMOTER                          | Glyma.02G233500 |
| GENE BODY                         | Glyma.02G251700 |
| GENE BODY                         | Glyma.02G257400 |
| PROMOTER                          | Glyma.02G258100 |
| GENE BODY                         | Glyma.02G269300 |
| 3'UTR(138bp); GENE BODY (62bp)    | Glyma.02G270000 |
| GENE BODY                         | Glyma.02G270300 |
| 3'UTR                             | Glyma.02G273400 |
| GENE BODY                         | Glyma.02G274600 |
| 3'UTR                             | Glyma.02G277700 |
| 3'UTR(122bp); GENE BODY (78bp)    | Glyma.02G277700 |
| GENE BODY                         | Glyma.02G281700 |
| GENE BODY                         | Glyma.02G287400 |
| 3'UTR                             | Glyma.02G295200 |
| GENE BODY                         | Glyma.02G296200 |
| GENE BODY                         | Glyma.02G298500 |
| GENE BODY                         | Glyma.02G305000 |
| PROMOTER                          | Glyma.02G307400 |
| GENE BODY                         | Glyma.02G312000 |

|                                  |                 |
|----------------------------------|-----------------|
| GENE BODY                        | Glyma.03G022900 |
| 3'UTR                            | Glyma.03G027100 |
| GENE BODY                        | Glyma.03G027600 |
| PROMOTER                         | Glyma.03G028200 |
| PROMOTER                         | Glyma.03G028200 |
| PROMOTER                         | Glyma.03G031900 |
| PROMOTER                         | Glyma.03G034100 |
| GENE BODY(112bp); PROMOTER(88bp) | Glyma.03G044100 |
| 3'UTR(81bp); GENE BODY (119bp)   | Glyma.03G047800 |
| GENE BODY                        | Glyma.03G051700 |
| GENE BODY                        | Glyma.03G057800 |
| GENE BODY                        | Glyma.03G058400 |
| GENE BODY                        | Glyma.03G060900 |
| GENE BODY                        | Glyma.03G068100 |
| GENE BODY                        | Glyma.03G076800 |
| GENE BODY                        | Glyma.03G076900 |
| GENE BODY                        | Glyma.03G079800 |
| GENE BODY                        | Glyma.03G080300 |
| 3'UTR(79bp)                      | Glyma.03G085700 |
| 5'UTR(55bp); PROMOTER(145bp)     | Glyma.03G086600 |
| 5'UTR(76bp); PROMOTER(124bp)     | Glyma.03G092600 |
| 5'UTR(76bp); PROMOTER(124bp)     | Glyma.03G092600 |
| GENE BODY(26bp); PROMOTER(174bp) | Glyma.03G097200 |
| PROMOTER                         | Glyma.03G100100 |
| PROMOTER                         | Glyma.03G102800 |
| GENE BODY                        | Glyma.03G105000 |
| PROMOTER                         | Glyma.03G114000 |
| GENE BODY                        | Glyma.03G114700 |
| GENE BODY                        | Glyma.03G116900 |
| GENE BODY                        | Glyma.03G118200 |
| GENE BODY                        | Glyma.03G121100 |
| PROMOTER                         | Glyma.03G121600 |
| GENE BODY                        | Glyma.03G127600 |
| GENE BODY                        | Glyma.03G132000 |
| GENE BODY                        | Glyma.03G132800 |
| GENE BODY                        | Glyma.03G133200 |
| GENE BODY                        | Glyma.03G138400 |
| 5' UTR                           | Glyma.03G143300 |
| GENE BODY                        | Glyma.03G146200 |
| PROMOTER                         | Glyma.03G147700 |
| 3'UTR(188bp)                     | Glyma.03G159000 |
| PROMOTER                         | Glyma.03G173600 |
| PROMOTER                         | Glyma.03G179900 |
| PROMOTER                         | Glyma.03G179900 |

|                                |                 |
|--------------------------------|-----------------|
| GENE BODY                      | Glyma.03G189700 |
| PROMOTER                       | Glyma.03G206200 |
| GENE BODY                      | Glyma.03G223300 |
| 5' UTR                         | Glyma.03G225700 |
| 5' UTR                         | Glyma.03G225700 |
| 5'UTR                          | Glyma.03G225700 |
| PROMOTER                       | Glyma.03G225800 |
| PROMOTER                       | Glyma.03G225800 |
| PROMOTER                       | Glyma.03G225800 |
| 5'UTR(194bp); PROMOTER(6bp)    | Glyma.03G232300 |
| GENE BODY                      | Glyma.03G235200 |
| GENE BODY                      | Glyma.03G247300 |
| PROMOTER                       | Glyma.03G252500 |
| GENE BODY                      | Glyma.03G256800 |
| GENE BODY                      | Glyma.03G264500 |
| PROMOTER                       | Glyma.04G007400 |
| PROMOTER                       | Glyma.04G007500 |
| GENE BODY                      | Glyma.04G010500 |
| GENE BODY (57bp); 3'UTR(143bp) | Glyma.04G011500 |
| GENE BODY                      | Glyma.04G016300 |
| GENE BODY                      | Glyma.04G017000 |
| PROMOTER                       | Glyma.04G018200 |
| GENE BODY                      | Glyma.04G025000 |
| GENE BODY                      | Glyma.04G025400 |
| GENE BODY                      | Glyma.04G028300 |
| GENE BODY                      | Glyma.04G034900 |
| GENE BODY                      | Glyma.04G039800 |
| GENE BODY                      | Glyma.04G039800 |
| GENE BODY                      | Glyma.04G053800 |
| PROMOTER                       | Glyma.04G064100 |
| GENE BODY                      | Glyma.04G064300 |
| PROMOTER                       | Glyma.04G065700 |
| 3'UTR(16bp); GENE BODY(184bp)  | Glyma.04G075200 |
| GENE BODY                      | Glyma.04G079800 |
| GENE BODY                      | Glyma.04G088300 |
| GENE BODY                      | Glyma.04G090500 |
| GENE BODY                      | Glyma.04G092200 |
| GENE BODY                      | Glyma.04G096100 |
| GENE BODY                      | Glyma.04G096100 |
| GENE BODY                      | Glyma.04G096100 |
| GENE BODY                      | Glyma.04G096900 |
| GENE BODY                      | Glyma.04G096900 |
| GENE BODY                      | Glyma.04G101100 |
| GENE BODY                      | Glyma.04G113100 |

|                                |                 |
|--------------------------------|-----------------|
| PROMOTER                       | Glyma.04G113800 |
| GENE BODY                      | Glyma.04G114800 |
| PROMOTER                       | Glyma.04G115000 |
| PROMOTER                       | Glyma.04G115800 |
| PROMOTER                       | Glyma.04G115800 |
| GENE BODY                      | Glyma.04G116200 |
| GENE BODY                      | Glyma.04G116700 |
| GENE BODY                      | Glyma.04G121500 |
| PROMOTER                       | Glyma.04G122800 |
| GENE BODY                      | Glyma.04G123500 |
| GENE BODY                      | Glyma.04G124800 |
| GENE BODY                      | Glyma.04G124800 |
| GENE BODY                      | Glyma.04G128600 |
| 3'UTR(42bp); GENE BODY (158bp) | Glyma.04G133800 |
| 3'UTR(166bp); GENE BODY (34bp) | Glyma.04G139200 |
| GENE BODY                      | Glyma.04G146900 |
| GENE BODY                      | Glyma.04G155000 |
| GENE BODY                      | Glyma.04G156500 |
| 5'UTR(95bp); PROMOTER (105bp)  | Glyma.04G157200 |
| GENE BODY                      | Glyma.04G158400 |
| 3'UTR(176bp); GENE BODY (24bp) | Glyma.04G162400 |
| GENE BODY                      | Glyma.04G176500 |
| GENE BODY                      | Glyma.04G177300 |
| GENE BODY                      | Glyma.04G182900 |
| GENE BODY                      | Glyma.04G182900 |
| PROMOTER                       | Glyma.04G188200 |
| GENE BODY                      | Glyma.04G190500 |
| PROMOTER                       | Glyma.04G191100 |
| PROMOTER                       | Glyma.04G193500 |
| GENE BODY                      | Glyma.04G193800 |
| 5'UTR(36bp); PROMOTER(164bp)   | Glyma.04G194600 |
| GENE BODY                      | Glyma.04G205000 |
| GENE BODY                      | Glyma.04G210400 |
| PROMOTER                       | Glyma.04G218200 |
| PROMOTER                       | Glyma.04G234000 |
| GENE BODY                      | Glyma.04G245400 |
| GENE BODY                      | Glyma.04G252700 |
| GENE BODY                      | Glyma.05G000600 |
| GENE BODY                      | Glyma.05G004900 |
| GENE BODY                      | Glyma.05G009500 |
| GENE BODY                      | Glyma.05G013500 |
| GENE BODY                      | Glyma.05G020900 |
| GENE BODY                      | Glyma.05G030700 |
| GENE BODY                      | Glyma.05G031300 |

|                                |                 |
|--------------------------------|-----------------|
| GENE BODY                      | Glyma.05G031900 |
| GENE BODY                      | Glyma.05G032600 |
| GENE BODY                      | Glyma.05G032600 |
| GENE BODY                      | Glyma.05G032600 |
| GENE BODY                      | Glyma.05G035900 |
| GENE BODY                      | Glyma.05G040600 |
| GENE BODY                      | Glyma.05G041600 |
| GENE BODY                      | Glyma.05G044500 |
| PROMOTER                       | Glyma.05G044900 |
| GENE BODY                      | Glyma.05G047400 |
| 3'UTR                          | Glyma.05G049500 |
| PROMOTER                       | Glyma.05G053000 |
| GENE BODY                      | Glyma.05G060200 |
| GENE BODY                      | Glyma.05G060200 |
| PROMOTER                       | Glyma.05G060700 |
| GENE BODY                      | Glyma.05G062800 |
| PROMOTER (92bp); 5'UTR(108bp)  | Glyma.05G067200 |
| PROMOTER (92bp); 5'UTR(108bp)  | Glyma.05G067200 |
| GENE BODY                      | Glyma.05G068200 |
| GENE BODY                      | Glyma.05G069000 |
| GENE BODY                      | Glyma.05G075100 |
| PROMOTER                       | Glyma.05G075200 |
| GENE BODY                      | Glyma.05G075400 |
| PROMOTER                       | Glyma.05G078500 |
| GENE BODY                      | Glyma.05G078600 |
| GENE BODY                      | Glyma.05G080100 |
| GENE BODY                      | Glyma.05G080100 |
| PROMOTER                       | Glyma.05G083300 |
| PROMOTER                       | Glyma.05G084500 |
| GENE BODY                      | Glyma.05G100500 |
| GENE BODY                      | Glyma.05G100500 |
| GENE BODY                      | Glyma.05G100500 |
| GENE BODY                      | Glyma.05G110200 |
| GENE BODY                      | Glyma.05G115200 |
| GENE BODY                      | Glyma.05G118100 |
| 3'UTR(153bp); GENE BODY (47bp) | Glyma.05G118200 |
| GENE BODY                      | Glyma.05G120400 |
| PROMOTER                       | Glyma.05G125000 |
| GENE BODY                      | Glyma.05G136600 |
| GENE BODY                      | Glyma.05G143100 |
| GENE BODY                      | Glyma.05G150300 |
| GENE BODY                      | Glyma.05G151100 |
| GENE BODY                      | Glyma.05G154700 |
| GENE BODY                      | Glyma.05G161000 |

|                                |                 |
|--------------------------------|-----------------|
| GENE BODY                      | Glyma.05G163700 |
| GENE BODY                      | Glyma.05G176400 |
| PROMOTER                       | Glyma.05G180000 |
| GENE BODY                      | Glyma.05G186200 |
| GENE BODY                      | Glyma.05G194700 |
| GENE BODY                      | Glyma.05G200600 |
| GENE BODY                      | Glyma.05G208100 |
| GENE BODY                      | Glyma.05G221200 |
| GENE BODY                      | Glyma.05G224700 |
| 5'UTR(174bp); PROMOTER(26bp)   | Glyma.05G236500 |
| GENE BODY                      | Glyma.05G248000 |
| GENE BODY                      | Glyma.06G016500 |
| GENE BODY                      | Glyma.06G016500 |
| GENE BODY                      | Glyma.06G016600 |
| GENE BODY                      | Glyma.06G016700 |
| GENE BODY                      | Glyma.06G018700 |
| PROMOTER                       | Glyma.06G032800 |
| 3'UTR                          | Glyma.06G033700 |
| GENE BODY                      | Glyma.06G049000 |
| GENE BODY                      | Glyma.06G056300 |
| GENE BODY                      | Glyma.06G061900 |
| GENE BODY                      | Glyma.06G067100 |
| GENE BODY                      | Glyma.06G073100 |
| 5'UTR(41bp); GENE BODY (159bp) | Glyma.06G090100 |
| PROMOTER                       | Glyma.06G090100 |
| PROMOTER                       | Glyma.06G090100 |
| PROMOTER                       | Glyma.06G090100 |
| GENE BODY                      | Glyma.06G098300 |
| GENE BODY                      | Glyma.06G099100 |
| GENE BODY                      | Glyma.06G108200 |
| 3'UTR(32bp); GENE BODY(168bp)  | Glyma.06G108900 |
| GENE BODY                      | Glyma.06G111200 |
| GENE BODY                      | Glyma.06G114500 |
| GENE BODY                      | Glyma.06G115100 |
| GENE BODY                      | Glyma.06G116500 |
| GENE BODY                      | Glyma.06G122500 |
| GENE BODY                      | Glyma.06G123000 |
| PROMOTER                       | Glyma.06G126000 |
| 5'UTR(73bp); GENE BODY(127bp)  | Glyma.06G130800 |
| GENE BODY                      | Glyma.06G137800 |

|                                  |                 |
|----------------------------------|-----------------|
| GENE BODY                        | Glyma.06G146400 |
| GENE BODY                        | Glyma.06G148600 |
| PROMOTER (170bp); 5' UTR (30bp)  | Glyma.06G158600 |
| GENE BODY                        | Glyma.06G159900 |
| GENE BODY                        | Glyma.06G163900 |
| GENE BODY                        | Glyma.06G173400 |
| GENE BODY                        | Glyma.06G173500 |
| GENE BODY                        | Glyma.06G173500 |
| 5'UTR(49bp); GENE BODY(151bp)    | Glyma.06G173600 |
| GENE BODY                        | Glyma.06G179300 |
| GENE BODY                        | Glyma.06G185000 |
| 5'UTR(18bp); GENE BODY (182bp)   | Glyma.06G195300 |
| 5'UTR(18bp); GENE BODY(182bp)    | Glyma.06G195300 |
| GENE BODY                        | Glyma.06G195300 |
| GENE BODY                        | Glyma.06G195300 |
| 3'UTR                            | Glyma.06G197600 |
| GENE BODY                        | Glyma.06G199800 |
| GENE BODY                        | Glyma.06G201500 |
| GENE BODY                        | Glyma.06G202500 |
| GENE BODY                        | Glyma.06G205200 |
| GENE BODY                        | Glyma.06G208900 |
| 3'UTR(133bp); GENE BODY (67bp)   | Glyma.06G209300 |
| GENE BODY                        | Glyma.06G211100 |
| PROMOTER                         | Glyma.06G212600 |
| PROMOTER(61bp); GENE BODY(139bp) | Glyma.06G212700 |
| GENE BODY                        | Glyma.06G213300 |
| GENE BODY                        | Glyma.06G214500 |
| GENE BODY                        | Glyma.06G214500 |
| GENE BODY                        | Glyma.06G214500 |
| GENE BODY                        | Glyma.06G218500 |
| GENE BODY                        | Glyma.06G218500 |
| GENE BODY                        | Glyma.06G218500 |
| GENE BODY                        | Glyma.06G220500 |
| GENE BODY                        | Glyma.06G223300 |
| GENE BODY                        | Glyma.06G223800 |
| GENE BODY                        | Glyma.06G228000 |
| GENE BODY                        | Glyma.06G228000 |
| GENE BODY                        | Glyma.06G228000 |
| GENE BODY                        | Glyma.06G230100 |
| GENE BODY                        | Glyma.06G237900 |
| GENE BODY                        | Glyma.06G238500 |
| GENE BODY                        | Glyma.06G238700 |
| GENE BODY                        | Glyma.06G238900 |
| 3'UTR(99bp); GENE BODY(2bp)      | Glyma.06G239200 |

|                              |                 |
|------------------------------|-----------------|
| GENE BODY                    | Glyma.06G242800 |
| PROMOTER                     | Glyma.06G243400 |
| GENE BODY                    | Glyma.06G243700 |
| PROMOTER                     | Glyma.06G247200 |
| PROMOTER                     | Glyma.06G247200 |
| GENE BODY                    | Glyma.06G254000 |
| 5' UTR                       | Glyma.06G256000 |
| 5' UTR                       | Glyma.06G256000 |
| GENE BODY                    | Glyma.06G259800 |
| GENE BODY                    | Glyma.06G260100 |
| GENE BODY                    | Glyma.06G260100 |
| GENE BODY                    | Glyma.06G261400 |
| GENE BODY                    | Glyma.06G265900 |
| GENE BODY                    | Glyma.06G268700 |
| GENE BODY                    | Glyma.06G268800 |
| 5' UTR                       | Glyma.06G268900 |
| GENE BODY                    | Glyma.06G269500 |
| GENE BODY                    | Glyma.06G271800 |
| GENE BODY                    | Glyma.06G275600 |
| PROMOTER                     | Glyma.06G276200 |
| PROMOTER                     | Glyma.06G285000 |
| GENE BODY                    | Glyma.06G286700 |
| PROMOTER                     | Glyma.06G289500 |
| PROMOTER                     | Glyma.06G289600 |
| PROMOTER(183bp); 5'UTR(17bp) | Glyma.06G296500 |
| GENE BODY                    | Glyma.06G297300 |
| PROMOTER                     | Glyma.06G305100 |
| GENE BODY                    | Glyma.06G308100 |
| GENE BODY                    | Glyma.06G309800 |
| GENE BODY                    | Glyma.06G311400 |
| PROMOTER                     | Glyma.06G315300 |
| GENE BODY                    | Glyma.06G318300 |
| GENE BODY                    | Glyma.07G003600 |
| GENE BODY                    | Glyma.07G004800 |
| GENE BODY                    | Glyma.07G006600 |
| GENE BODY                    | Glyma.07G008200 |
| GENE BODY                    | Glyma.07G009000 |
| GENE BODY                    | Glyma.07G026800 |
| GENE BODY                    | Glyma.07G028100 |
| GENE BODY                    | Glyma.07G028100 |
| GENE BODY                    | Glyma.07G029200 |
| GENE BODY                    | Glyma.07G029500 |
| GENE BODY                    | Glyma.07G034600 |
| GENE BODY                    | Glyma.07G035100 |



|                                  |                 |
|----------------------------------|-----------------|
| GENE BODY                        | Glyma.07G043700 |
| GENE BODY                        | Glyma.07G046000 |
| GENE BODY                        | Glyma.07G047300 |
| GENE BODY                        | Glyma.07G051000 |
| GENE BODY                        | Glyma.07G069500 |
| GENE BODY                        | Glyma.07G069500 |
| GENE BODY                        | Glyma.07G069600 |
| GENE BODY                        | Glyma.07G072900 |
| GENE BODY                        | Glyma.07G077400 |
| GENE BODY                        | Glyma.07G079000 |
| 3'UTR                            | Glyma.07G079100 |
| GENE BODY(113bp); PROMOTER(87bp) | Glyma.07G079200 |
| PROMOTER                         | Glyma.07G079300 |
| PROMOTER                         | Glyma.07G087000 |
| GENE BODY                        | Glyma.07G087700 |
| 3'UTR                            | Glyma.07G092600 |
| 5'UTR(100bp); GENE BODY(100bp)   | Glyma.07G094000 |
| GENE BODY                        | Glyma.07G101200 |
| GENE BODY                        | Glyma.07G103200 |
| PROMOTER                         | Glyma.07G107300 |
| GENE BODY                        | Glyma.07G113100 |
| GENE BODY                        | Glyma.07G114200 |
| 3'UTR                            | Glyma.07G116900 |
| GENE BODY                        | Glyma.07G119900 |
| GENE BODY (122bp); 3'UTR(78bp)   | Glyma.07G124500 |
| GENE BODY (122bp); 3'UTR(78bp)   | Glyma.07G124500 |
| GENE BODY                        | Glyma.07G125300 |
| GENE BODY                        | Glyma.07G125300 |
| GENE BODY                        | Glyma.07G128300 |
| PROMOTER                         | Glyma.07G129700 |
| GENE BODY                        | Glyma.07G136200 |
| PROMOTER                         | Glyma.07G136300 |
| GENE BODY                        | Glyma.07G149900 |
| GENE BODY                        | Glyma.07G152100 |
| PROMOTER                         | Glyma.07G154400 |
| GENE BODY                        | Glyma.07G156500 |
| PROMOTER                         | Glyma.07G157400 |
| PROMOTER                         | Glyma.07G165700 |
| GENE BODY                        | Glyma.07G169700 |
| GENE BODY                        | Glyma.07G170200 |
| GENE BODY                        | Glyma.07G171000 |
| GENE BODY                        | Glyma.07G177100 |
| GENE BODY                        | Glyma.07G184700 |
| PROMOTER                         | Glyma.07G190600 |

|                                |                 |
|--------------------------------|-----------------|
| GENE BODY                      | Glyma.07G197000 |
| GENE BODY                      | Glyma.07G204000 |
| GENE BODY                      | Glyma.07G204700 |
| GENE BODY                      | Glyma.07G205900 |
| PROMOTER                       | Glyma.07G209100 |
| PROMOTER                       | Glyma.07G212700 |
| 3'UTR                          | Glyma.07G218100 |
| GENE BODY                      | Glyma.07G224600 |
| GENE BODY                      | Glyma.07G225000 |
| GENE BODY                      | Glyma.07G230600 |
| PROMOTER                       | Glyma.07G232300 |
| GENE BODY                      | Glyma.07G236300 |
| PROMOTER                       | Glyma.07G236900 |
| GENE BODY                      | Glyma.07G259300 |
| GENE BODY                      | Glyma.07G264000 |
| GENE BODY                      | Glyma.07G264000 |
| PROMOTER                       | Glyma.07G268700 |
| PROMOTER                       | Glyma.07G274200 |
| PROMOTER                       | Glyma.07G274300 |
| GENE BODY                      | Glyma.08G004700 |
| GENE BODY                      | Glyma.08G013000 |
| GENE BODY                      | Glyma.08G013500 |
| 3'UTR(55bp); GENE BODY (145bp) | Glyma.08G027700 |
| GENE BODY                      | Glyma.08G028200 |
| 3'UTR                          | Glyma.08G028400 |
| GENE BODY                      | Glyma.08G036600 |
| PROMOTER                       | Glyma.08G039800 |
| GENE BODY                      | Glyma.08G041700 |
| GENE BODY                      | Glyma.08G041700 |
| GENE BODY                      | Glyma.08G044900 |
| GENE BODY                      | Glyma.08G063500 |
| GENE BODY                      | Glyma.08G065300 |
| GENE BODY                      | Glyma.08G071900 |
| GENE BODY                      | Glyma.08G074600 |
| 5'UTR(6bp); GENE BODY(194bp)   | Glyma.08G075700 |
| GENE BODY                      | Glyma.08G082500 |
| PROMOTER (195bp); 5'UTR(5bp)   | Glyma.08G083400 |
| 3'UTR(78bp); GENE BODY (122bp) | Glyma.08G092700 |
| GENE BODY                      | Glyma.08G097800 |
| GENE BODY                      | Glyma.08G100800 |
| GENE BODY                      | Glyma.08G108500 |
| GENE BODY                      | Glyma.08G111500 |
| PROMOTER                       | Glyma.08G115800 |
| GENE BODY                      | Glyma.08G125700 |

|                                 |                 |
|---------------------------------|-----------------|
| GENE BODY                       | Glyma.08G127200 |
| GENE BODY                       | Glyma.08G139300 |
| GENE BODY                       | Glyma.08G140100 |
| PROMOTER                        | Glyma.08G140400 |
| GENE BODY                       | Glyma.08G141100 |
| GENE BODY                       | Glyma.08G151600 |
| GENE BODY                       | Glyma.08G170000 |
| 3'UTR(6bp); GENE BODY (194bp)   | Glyma.08G171900 |
| PROMOTER                        | Glyma.08G191200 |
| GENE BODY                       | Glyma.08G192200 |
| GENE BODY                       | Glyma.08G194600 |
| GENE BODY                       | Glyma.08G197700 |
| GENE BODY                       | Glyma.08G202800 |
| GENE BODY                       | Glyma.08G209500 |
| GENE BODY                       | Glyma.08G213900 |
| GENE BODY                       | Glyma.08G219200 |
| PROMOTER                        | Glyma.08G220700 |
| GENE BODY                       | Glyma.08G222300 |
| GENE BODY                       | Glyma.08G228000 |
| 3'UTR                           | Glyma.08G233900 |
| 3'UTR (178bp); GENE BODY (22bp) | Glyma.08G233900 |
| 5'UTR(21bp); GENE BODY(179bp)   | Glyma.08G233900 |
| 5'UTR(37bp); PROMOTER(163bp)    | Glyma.08G233900 |
| 5'UTR(37bp); PROMOTER(163bp)    | Glyma.08G233900 |
| GENE BODY                       | Glyma.08G236400 |
| GENE BODY                       | Glyma.08G236700 |
| GENE BODY                       | Glyma.08G237500 |
| 3'UTR(154bp); GENE BODY (46bp)  | Glyma.08G238000 |
| GENE BODY                       | Glyma.08G238000 |
| 5'UTR(156bp); GENE BODY (44bp)  | Glyma.08G238500 |
| GENE BODY                       | Glyma.08G238800 |
| 3'UTR(189bp); GENE BODY (11bp)  | Glyma.08G239000 |
| GENE BODY                       | Glyma.08G240400 |
| 3'UTR(93bp); GENE BODY (107bp)  | Glyma.08G241100 |
| PROMOTER                        | Glyma.08G241900 |
| GENE BODY                       | Glyma.08G242700 |
| GENE BODY                       | Glyma.08G249400 |
| GENE BODY                       | Glyma.08G253800 |

|                                  |                 |
|----------------------------------|-----------------|
| PROMOTER                         | Glyma.08G258900 |
| GENE BODY                        | Glyma.08G259000 |
| GENE BODY                        | Glyma.08G264900 |
| GENE BODY                        | Glyma.08G264900 |
| GENE BODY                        | Glyma.08G265300 |
| PROMOTER                         | Glyma.08G268800 |
| PROMOTER                         | Glyma.08G271700 |
| 3'UTR(49bp); GENE BODY (151bp)   | Glyma.08G273000 |
| GENE BODY                        | Glyma.08G273000 |
| GENE BODY                        | Glyma.08G275100 |
| GENE BODY                        | Glyma.08G275100 |
| GENE BODY(182bp); PROMOTER(18bp) | Glyma.08G275100 |
| PROMOTER                         | Glyma.08G275100 |
| PROMOTER                         | Glyma.08G275100 |
| GENE BODY                        | Glyma.08G276200 |
| GENE BODY                        | Glyma.08G276200 |
| GENE BODY                        | Glyma.08G276200 |
| GENE BODY                        | Glyma.08G279100 |
| GENE BODY                        | Glyma.08G279300 |
| GENE BODY                        | Glyma.08G279800 |
| PROMOTER                         | Glyma.08G279800 |
| 3'UTR                            | Glyma.08G282400 |
| GENE BODY                        | Glyma.08G283600 |
| GENE BODY                        | Glyma.08G288100 |
| GENE BODY                        | Glyma.08G291800 |
| PROMOTER                         | Glyma.08G300900 |
| GENE BODY                        | Glyma.08G324900 |
| GENE BODY                        | Glyma.08G328500 |
| GENE BODY                        | Glyma.08G344800 |
| PROMOTER                         | Glyma.08G349000 |
| PROMOTER(191bp); 5'UTR(9bp)      | Glyma.08G357000 |
| PROMOTER(191bp); 5'UTR(9bp)      | Glyma.08G357000 |
| 3'UTR(20bp); GENE BODY (180bp)   | Glyma.08G362400 |
| GENE BODY                        | Glyma.09G002600 |
| GENE BODY                        | Glyma.09G002700 |
| GENE BODY                        | Glyma.09G013300 |
| GENE BODY                        | Glyma.09G015100 |
| GENE BODY                        | Glyma.09G016800 |
| GENE BODY                        | Glyma.09G017000 |
| GENE BODY                        | Glyma.09G023600 |
| GENE BODY                        | Glyma.09G024400 |
| 5'UTR(75bp); GENE BODY(125bp)    | Glyma.09G025000 |
| GENE BODY                        | Glyma.09G025400 |
| PROMOTER                         | Glyma.09G027300 |

|                                  |                 |
|----------------------------------|-----------------|
| PROMOTER                         | Glyma.09G029700 |
| GENE BODY                        | Glyma.09G030300 |
| PROMOTER                         | Glyma.09G042800 |
| 5'UTR(67bp); GENE BODY (133bp)   | Glyma.09G046700 |
| 5'UTR(67bp); GENE BODY(133bp)    | Glyma.09G046700 |
| PROMOTER                         | Glyma.09G049100 |
| PROMOTER                         | Glyma.09G055900 |
| GENE BODY                        | Glyma.09G056100 |
| GENE BODY                        | Glyma.09G057400 |
| 5'UTR(62bp); GENE BODY(138bp)    | Glyma.09G057800 |
| GENE BODY                        | Glyma.09G065300 |
| GENE BODY                        | Glyma.09G065300 |
| PROMOTER                         | Glyma.09G068500 |
| GENE BODY                        | Glyma.09G070600 |
| PROMOTER                         | Glyma.09G072500 |
| GENE BODY                        | Glyma.09G073100 |
| PROMOTER                         | Glyma.09G078600 |
| GENE BODY                        | Glyma.09G083800 |
| GENE BODY                        | Glyma.09G084300 |
| GENE BODY                        | Glyma.09G089400 |
| GENE BODY                        | Glyma.09G095400 |
| PROMOTER                         | Glyma.09G109200 |
| PROMOTER                         | Glyma.09G110200 |
| GENE BODY                        | Glyma.09G110300 |
| PROMOTER                         | Glyma.09G111900 |
| PROMOTER(167bp); GENE BODY(33bp) | Glyma.09G112800 |
| GENE BODY                        | Glyma.09G116800 |
| GENE BODY                        | Glyma.09G120200 |
| GENE BODY                        | Glyma.09G121300 |
| GENE BODY                        | Glyma.09G124400 |
| PROMOTER                         | Glyma.09G124900 |
| 3'UTR(85bp)                      | Glyma.09G126300 |
| PROMOTER                         | Glyma.09G129600 |
| GENE BODY                        | Glyma.09G130900 |
| PROMOTER                         | Glyma.09G144900 |
| GENE BODY                        | Glyma.09G148000 |
| 3'UTR                            | Glyma.09G148100 |
| GENE BODY                        | Glyma.09G148500 |
| GENE BODY                        | Glyma.09G153500 |
| PROMOTER                         | Glyma.09G154200 |
| GENE BODY                        | Glyma.09G170600 |
| GENE BODY                        | Glyma.09G171000 |
| 5'UTR (82bp); PROMOTER (118bp)   | Glyma.09G171400 |
| GENE BODY                        | Glyma.09G180800 |

|                                   |                 |
|-----------------------------------|-----------------|
| PROMOTER                          | Glyma.09G183100 |
| GENE BODY                         | Glyma.09G188000 |
| 3'UTR(29bp); GENE BODY (171bp)    | Glyma.09G190300 |
| GENE BODY                         | Glyma.09G191600 |
| PROMOTER                          | Glyma.09G193200 |
| GENE BODY                         | Glyma.09G194400 |
| GENE BODY                         | Glyma.09G199100 |
| PROMOTER                          | Glyma.09G202900 |
| PROMOTER                          | Glyma.09G202900 |
| GENE BODY(95bp); PROMOTER (105bp) | Glyma.09G219500 |
| PROMOTER                          | Glyma.09G219600 |
| GENE BODY                         | Glyma.09G228300 |
| PROMOTER                          | Glyma.09G230600 |
| GENE BODY                         | Glyma.09G234400 |
| GENE BODY                         | Glyma.09G237200 |
| GENE BODY                         | Glyma.09G246500 |
| GENE BODY                         | Glyma.09G251200 |
| 3'UTR                             | Glyma.09G258900 |
| 3'UTR(11bp); GENE BODY (189bp)    | Glyma.09G259200 |
| PROMOTER                          | Glyma.09G259300 |
| GENE BODY                         | Glyma.09G271700 |
| GENE BODY                         | Glyma.09G279900 |
| PROMOTER                          | Glyma.09G286200 |
| GENE BODY                         | Glyma.10G008300 |
| GENE BODY                         | Glyma.10G009700 |
| GENE BODY                         | Glyma.10G020700 |
| GENE BODY                         | Glyma.10G023000 |
| GENE BODY                         | Glyma.10G023300 |
| GENE BODY                         | Glyma.10G025000 |
| GENE BODY                         | Glyma.10G028000 |
| GENE BODY                         | Glyma.10G030000 |
| GENE BODY (191bp); 3'UTR(9bp)     | Glyma.10G034900 |
| 5'UTR(110bp); GENE BODY (90bp)    | Glyma.10G043400 |
| 5'UTR(6bp); GENE BODY(194bp)      | Glyma.10G054400 |
| GENE BODY                         | Glyma.10G060000 |
| GENE BODY                         | Glyma.10G065800 |
| GENE BODY                         | Glyma.10G065900 |
| GENE BODY                         | Glyma.10G075900 |
| GENE BODY                         | Glyma.10G078700 |
| GENE BODY                         | Glyma.10G078900 |
| GENE BODY                         | Glyma.10G083500 |
| GENE BODY                         | Glyma.10G095200 |
| GENE BODY                         | Glyma.10G095200 |
| GENE BODY                         | Glyma.10G095200 |

|                                   |                 |
|-----------------------------------|-----------------|
| GENE BODY                         | Glyma.10G095200 |
| GENE BODY                         | Glyma.10G095200 |
| GENE BODY                         | Glyma.10G096900 |
| PROMOTER(171bp); 5'UTR(29bp)      | Glyma.10G098700 |
| PROMOTER(171bp); 5'UTR(29bp)      | Glyma.10G098700 |
| GENE BODY                         | Glyma.10G102200 |
| GENE BODY                         | Glyma.10G102900 |
| GENE BODY (115bp); PROMOTER(85bp) | Glyma.10G102900 |
| GENE BODY                         | Glyma.10G104300 |
| GENE BODY                         | Glyma.10G108500 |
| GENE BODY                         | Glyma.10G111500 |
| GENE BODY                         | Glyma.10G118100 |
| GENE BODY                         | Glyma.10G118800 |
| GENE BODY                         | Glyma.10G120900 |
| GENE BODY                         | Glyma.10G123400 |
| GENE BODY                         | Glyma.10G123400 |
| GENE BODY                         | Glyma.10G143600 |
| GENE BODY                         | Glyma.10G148600 |
| GENE BODY                         | Glyma.10G149700 |
| GENE BODY                         | Glyma.10G151500 |
| GENE BODY                         | Glyma.10G151700 |
| 3'UTR(136bp); GENE BODY (64bp)    | Glyma.10G152500 |
| GENE BODY                         | Glyma.10G159300 |
| GENE BODY                         | Glyma.10G159500 |
| PROMOTER                          | Glyma.10G164400 |
| GENE BODY                         | Glyma.10G166200 |
| 3'UTR                             | Glyma.10G171500 |
| PROMOTER                          | Glyma.10G174000 |
| GENE BODY                         | Glyma.10G183000 |
| GENE BODY                         | Glyma.10G187800 |
| GENE BODY                         | Glyma.10G189200 |
| GENE BODY                         | Glyma.10G191500 |
| PROMOTER                          | Glyma.10G195900 |
| PROMOTER                          | Glyma.10G197100 |
| GENE BODY                         | Glyma.10G201600 |
| GENE BODY                         | Glyma.10G202600 |
| 5'UTR(93bp); GENE BODY(107bp)     | Glyma.10G208100 |
| GENE BODY                         | Glyma.10G209400 |
| GENE BODY                         | Glyma.10G209600 |
| PROMOTER                          | Glyma.10G229600 |
| 3'UTR(102bp)                      | Glyma.10G233300 |
| 3'UTR(102bp)                      | Glyma.10G233300 |
| PROMOTER                          | Glyma.10G235100 |
| GENE BODY                         | Glyma.10G241900 |

|                                 |                 |
|---------------------------------|-----------------|
| PROMOTER                        | Glyma.10G243300 |
| 3'UTR(8bp)                      | Glyma.10G246000 |
| PROMOTER                        | Glyma.10G281900 |
| GENE BODY                       | Glyma.10G283000 |
| 5'UTR(81bp); GENE BODY (119bp)  | Glyma.10G294000 |
| 3'UTR(47bp); GENE BODY(153bp)   | Glyma.10G294300 |
| GENE BODY                       | Glyma.10G298900 |
| GENE BODY                       | Glyma.11G002600 |
| GENE BODY                       | Glyma.11G008700 |
| PROMOTER                        | Glyma.11G020100 |
| PROMOTER                        | Glyma.11G020100 |
| GENE BODY                       | Glyma.11G037300 |
| GENE BODY                       | Glyma.11G039900 |
| 3'UTR(125bp); GENE BODY(75bp)   | Glyma.11G040000 |
| PROMOTER                        | Glyma.11G055200 |
| GENE BODY                       | Glyma.11G057000 |
| GENE BODY                       | Glyma.11G065700 |
| GENE BODY                       | Glyma.11G082200 |
| PROMOTER                        | Glyma.11G096200 |
| PROMOTER                        | Glyma.11G102700 |
| GENE BODY                       | Glyma.11G102800 |
| GENE BODY                       | Glyma.11G108500 |
| GENE BODY                       | Glyma.11G109800 |
| GENE BODY                       | Glyma.11G110100 |
| PROMOTER                        | Glyma.11G129700 |
| PROMOTER                        | Glyma.11G141100 |
| GENE BODY                       | Glyma.11G152600 |
| PROMOTER(198bp); GENE BODY(2bp) | Glyma.11G170700 |
| GENE BODY                       | Glyma.11G184900 |
| GENE BODY                       | Glyma.11G188100 |
| GENE BODY                       | Glyma.11G188900 |
| 3'UTR(104bp); GENE BODY (96bp)  | Glyma.11G191000 |
| GENE BODY                       | Glyma.11G192500 |
| GENE BODY                       | Glyma.11G193100 |
| GENE BODY                       | Glyma.11G194700 |
| PROMOTER                        | Glyma.11G200200 |
| PROMOTER                        | Glyma.11G206200 |
| GENE BODY                       | Glyma.11G222900 |
| GENE BODY                       | Glyma.11G228600 |
| PROMOTER                        | Glyma.11G228700 |
| 5'UTR(2bp); GENE BODY(198bp)    | Glyma.11G251600 |
| PROMOTER                        | Glyma.11G252300 |
| GENE BODY                       | Glyma.11G256800 |
| GENE BODY                       | Glyma.12G004100 |



|                                  |                 |
|----------------------------------|-----------------|
| GENE BODY                        | Glyma.12G004100 |
| GENE BODY                        | Glyma.12G016700 |
| GENE BODY                        | Glyma.12G027600 |
| GENE BODY                        | Glyma.12G036400 |
| PROMOTER                         | Glyma.12G041100 |
| GENE BODY                        | Glyma.12G051000 |
| GENE BODY                        | Glyma.12G051000 |
| GENE BODY                        | Glyma.12G051000 |
| PROMOTER                         | Glyma.12G051800 |
| PROMOTER                         | Glyma.12G060800 |
| GENE BODY                        | Glyma.12G066300 |
| 5'UTR(165bp); PROMOTER (35bp)    | Glyma.12G066400 |
| GENE BODY                        | Glyma.12G067900 |
| PROMOTER                         | Glyma.12G074700 |
| 3'UTR(84bp); GENE BODY (116bp)   | Glyma.12G082100 |
| GENE BODY                        | Glyma.12G084300 |
| GENE BODY                        | Glyma.12G096900 |
| PROMOTER                         | Glyma.12G117500 |
| GENE BODY                        | Glyma.12G119500 |
| GENE BODY                        | Glyma.12G133500 |
| GENE BODY                        | Glyma.12G133500 |
| GENE BODY                        | Glyma.12G136600 |
| PROMOTER                         | Glyma.12G137100 |
| GENE BODY(154bp); PROMOTER(46bp) | Glyma.12G140800 |
| GENE BODY(154bp); PROMOTER(46bp) | Glyma.12G140800 |
| PROMOTER                         | Glyma.12G147400 |
| GENE BODY                        | Glyma.12G152300 |
| GENE BODY                        | Glyma.12G152700 |
| GENE BODY                        | Glyma.12G155900 |
| GENE BODY                        | Glyma.12G156200 |
| GENE BODY                        | Glyma.12G157800 |
| GENE BODY                        | Glyma.12G158600 |
| GENE BODY                        | Glyma.12G166100 |
| GENE BODY                        | Glyma.12G180100 |
| GENE BODY                        | Glyma.12G180800 |
| GENE BODY                        | Glyma.12G192300 |
| GENE BODY                        | Glyma.12G198100 |
| GENE BODY                        | Glyma.12G198100 |
| GENE BODY                        | Glyma.12G201100 |
| GENE BODY                        | Glyma.12G203700 |
| GENE BODY                        | Glyma.12G205500 |
| GENE BODY                        | Glyma.12G205500 |
| GENE BODY                        | Glyma.12G209100 |
| GENE BODY                        | Glyma.12G214200 |

|                                    |                 |
|------------------------------------|-----------------|
| GENE BODY                          | Glyma.12G216200 |
| GENE BODY                          | Glyma.12G219400 |
| PROMOTER                           | Glyma.12G223100 |
| GENE BODY                          | Glyma.12G226700 |
| GENE BODY                          | Glyma.12G229900 |
| GENE BODY                          | Glyma.12G230600 |
| GENE BODY                          | Glyma.12G231800 |
| GENE BODY                          | Glyma.12G235100 |
| GENE BODY                          | Glyma.12G241600 |
| GENE BODY                          | Glyma.13G003500 |
| GENE BODY                          | Glyma.13G006200 |
| GENE BODY                          | Glyma.13G010000 |
| GENE BODY                          | Glyma.13G010000 |
| GENE BODY                          | Glyma.13G026100 |
| GENE BODY                          | Glyma.13G027100 |
| GENE BODY (158bp)                  | Glyma.13G030000 |
| GENE BODY (93bp); PROMOTER (107bp) | Glyma.13G030000 |
| PROMOTER                           | Glyma.13G030000 |
| PROMOTER(107bp); GENE BODY(93bp)   | Glyma.13G030000 |
| PROMOTER                           | Glyma.13G030100 |
| GENE BODY                          | Glyma.13G030600 |
| GENE BODY                          | Glyma.13G035200 |
| GENE BODY                          | Glyma.13G036000 |
| 3'UTR                              | Glyma.13G036700 |
| PROMOTER                           | Glyma.13G038300 |
| 3'UTR                              | Glyma.13G042400 |
| GENE BODY                          | Glyma.13G048300 |
| PROMOTER                           | Glyma.13G052600 |
| GENE BODY                          | Glyma.13G053700 |
| GENE BODY                          | Glyma.13G058600 |
| GENE BODY                          | Glyma.13G058800 |
| 3'UTR(34bp); GENE BODY (166bp)     | Glyma.13G059000 |
| 3'UTR                              | Glyma.13G059600 |
| PROMOTER                           | Glyma.13G062000 |
| PROMOTER                           | Glyma.13G062000 |
| GENE BODY                          | Glyma.13G063600 |
| PROMOTER                           | Glyma.13G067700 |
| GENE BODY                          | Glyma.13G073900 |

|                                |                 |
|--------------------------------|-----------------|
| GENE BODY                      | Glyma.13G078200 |
| GENE BODY                      | Glyma.13G078200 |
| GENE BODY                      | Glyma.13G078800 |
| GENE BODY                      | Glyma.13G084100 |
| GENE BODY                      | Glyma.13G089300 |
| GENE BODY                      | Glyma.13G115500 |
| GENE BODY                      | Glyma.13G119100 |
| GENE BODY                      | Glyma.13G127500 |
| GENE BODY                      | Glyma.13G128700 |
| GENE BODY                      | Glyma.13G129900 |
| GENE BODY                      | Glyma.13G130000 |
| 3'UTR                          | Glyma.13G130500 |
| GENE BODY                      | Glyma.13G130700 |
| PROMOTER                       | Glyma.13G130900 |
| PROMOTER                       | Glyma.13G131000 |
| GENE BODY                      | Glyma.13G134400 |
| GENE BODY                      | Glyma.13G135800 |
| GENE BODY                      | Glyma.13G156600 |
| PROMOTER                       | Glyma.13G156900 |
| PROMOTER                       | Glyma.13G156900 |
| GENE BODY                      | Glyma.13G160000 |
| PROMOTER                       | Glyma.13G160300 |
| GENE BODY                      | Glyma.13G166100 |
| GENE BODY                      | Glyma.13G174500 |
| GENE BODY                      | Glyma.13G174900 |
| GENE BODY                      | Glyma.13G184600 |
| GENE BODY                      | Glyma.13G189000 |
| 5'UTR (94bp); PROMOTER (106bp) | Glyma.13G190500 |
| GENE BODY                      | Glyma.13G194900 |
| GENE BODY                      | Glyma.13G196700 |
| GENE BODY                      | Glyma.13G196900 |
| GENE BODY                      | Glyma.13G198700 |
| 5'UTR(97bp); GENE BODY(103bp)  | Glyma.13G209200 |
| GENE BODY                      | Glyma.13G221400 |
| GENE BODY                      | Glyma.13G223400 |
| PROMOTER                       | Glyma.13G225300 |
| GENE BODY                      | Glyma.13G233400 |
| GENE BODY                      | Glyma.13G233400 |
| GENE BODY                      | Glyma.13G235300 |
| PROMOTER                       | Glyma.13G235300 |
| GENE BODY                      | Glyma.13G239300 |
| GENE BODY                      | Glyma.13G244200 |
| GENE BODY                      | Glyma.13G253600 |
| GENE BODY                      | Glyma.13G259100 |

|                                |                 |
|--------------------------------|-----------------|
| PROMOTER                       | Glyma.13G259200 |
| GENE BODY                      | Glyma.13G275400 |
| PROMOTER                       | Glyma.13G277200 |
| GENE BODY                      | Glyma.13G277700 |
| GENE BODY                      | Glyma.13G278800 |
| 3'UTR(129bp); GENE BODY (71bp) | Glyma.13G281900 |
| 5'UTR(111bp); GENE BODY (89bp) | Glyma.13G283900 |
| 5'UTR(111bp); GENE BODY (89bp) | Glyma.13G283900 |
| 5'UTR(111bp); GENE BODY (89bp) | Glyma.13G283900 |
| PROMOTER                       | Glyma.13G289400 |
| GENE BODY                      | Glyma.13G296400 |
| 3'UTR(107bp); GENE BODY (93bp) | Glyma.13G302900 |
| PROMOTER                       | Glyma.13G305700 |
| PROMOTER                       | Glyma.13G305700 |
| GENE BODY                      | Glyma.13G322000 |
| GENE BODY                      | Glyma.13G326400 |
| PROMOTER                       | Glyma.13G328200 |
| GENE BODY                      | Glyma.13G342500 |
| PROMOTER                       | Glyma.13G345000 |
| PROMOTER                       | Glyma.13G345100 |
| PROMOTER                       | Glyma.13G352500 |
| GENE BODY                      | Glyma.13G355800 |
| GENE BODY                      | Glyma.13G367200 |
| PROMOTER                       | Glyma.13G368100 |
| GENE BODY                      | Glyma.13G371300 |
| GENE BODY                      | Glyma.13G372400 |
| GENE BODY                      | Glyma.13G372400 |
| GENE BODY                      | Glyma.14G018300 |
| GENE BODY                      | Glyma.14G025300 |
| GENE BODY                      | Glyma.14G031300 |
| GENE BODY                      | Glyma.14G044300 |
| GENE BODY                      | Glyma.14G044300 |
| GENE BODY                      | Glyma.14G044900 |
| GENE BODY                      | Glyma.14G045600 |
| PROMOTER                       | Glyma.14G056000 |
| GENE BODY                      | Glyma.14G066000 |
| GENE BODY                      | Glyma.14G066100 |
| GENE BODY                      | Glyma.14G066600 |
| 3'UTR                          | Glyma.14G083300 |
| GENE BODY                      | Glyma.14G084400 |
| GENE BODY                      | Glyma.14G091400 |
| GENE BODY                      | Glyma.14G092100 |
| 5'UTR (177bp); PROMOTER (23bp) | Glyma.14G095000 |
| GENE BODY                      | Glyma.14G095200 |

|                                          |                 |
|------------------------------------------|-----------------|
| 5'UTR(49bp); PROMOTER(151bp)             | Glyma.14G095300 |
| GENE BODY                                | Glyma.14G098000 |
| GENE BODY                                | Glyma.14G098100 |
| GENE BODY                                | Glyma.14G099300 |
| GENE BODY                                | Glyma.14G104400 |
| PROMOTER                                 | Glyma.14G104800 |
| GENE BODY                                | Glyma.14G105100 |
| GENE BODY                                | Glyma.14G105100 |
| PROMOTER                                 | Glyma.14G106300 |
| PROMOTER                                 | Glyma.14G106300 |
| PROMOTER                                 | Glyma.14G108800 |
| PROMOTER                                 | Glyma.14G108800 |
| 5'UTR                                    | Glyma.14G110800 |
| GENE BODY                                | Glyma.14G112200 |
| 3'UTR                                    | Glyma.14G112600 |
| GENE BODY                                | Glyma.14G112700 |
| GENE BODY                                | Glyma.14G119200 |
| GENE BODY                                | Glyma.14G119200 |
| PROMOTER                                 | Glyma.14G120000 |
| PROMOTER (173bp); 5' UTR (27bp)          | Glyma.14G121200 |
| GENE BODY                                | Glyma.14G128300 |
| GENE BODY                                | Glyma.14G129100 |
| GENE BODY                                | Glyma.14G131700 |
| 5'UTR(14bp); GENE BODY(186bp)            | Glyma.14G132500 |
| GENE BODY                                | Glyma.14G132500 |
| PROMOTER                                 | Glyma.14G137100 |
| PROMOTER                                 | Glyma.14G137400 |
| GENE BODY                                | Glyma.14G138900 |
| 3'UTR(70bp); GENE BODY (130bp)           | Glyma.14G140600 |
| GENE BODY                                | Glyma.14G141800 |
| GENE BODY                                | Glyma.14G142100 |
| GENE BODY                                | Glyma.14G145000 |
| 5'UTR                                    | Glyma.14G150500 |
| GENE BODY                                | Glyma.14G151100 |
| PROMOTER (37bp); 5' UTR(122bp); GENE BOI | Glyma.14G159200 |
| GENE BODY                                | Glyma.14G159200 |
| PROMOTER                                 | Glyma.14G159200 |
| PROMOTER(37bp); 5'UTR(122bp); GENE BOD   | Glyma.14G159200 |
| 3'UTR(17bp)                              | Glyma.14G160400 |
| GENE BODY                                | Glyma.14G160400 |
| GENE BODY                                | Glyma.14G160400 |
| GENE BODY                                | Glyma.14G161200 |
| GENE BODY                                | Glyma.14G162300 |
| GENE BODY                                | Glyma.14G162300 |

|                                  |                 |
|----------------------------------|-----------------|
| GENE BODY                        | Glyma.14G162300 |
| GENE BODY                        | Glyma.14G162300 |
| GENE BODY                        | Glyma.14G163000 |
| GENE BODY                        | Glyma.14G163000 |
| 5'UTR(117bp); GENE BODY (83bp)   | Glyma.14G163100 |
| GENE BODY                        | Glyma.14G164000 |
| GENE BODY                        | Glyma.14G164000 |
| 3'UTR                            | Glyma.14G166700 |
| GENE BODY                        | Glyma.14G170300 |
| GENE BODY                        | Glyma.14G170300 |
| PROMOTER                         | Glyma.14G171200 |
| PROMOTER                         | Glyma.14G179000 |
| GENE BODY                        | Glyma.14G179100 |
| GENE BODY                        | Glyma.14G179200 |
| GENE BODY                        | Glyma.14G183500 |
| 5'UTR(23bp); GENE BODY(177bp)    | Glyma.14G186900 |
| GENE BODY                        | Glyma.14G190200 |
| 3'UTR(72bp); GENE BODY (128bp)   | Glyma.14G190400 |
| GENE BODY                        | Glyma.14G190900 |
| GENE BODY                        | Glyma.14G192900 |
| PROMOTER                         | Glyma.14G199800 |
| GENE BODY                        | Glyma.14G200600 |
| GENE BODY(89bp); PROMOTER(111bp) | Glyma.14G200800 |
| PROMOTER                         | Glyma.14G200800 |
| GENE BODY                        | Glyma.14G204100 |
| GENE BODY                        | Glyma.14G211800 |
| PROMOTER                         | Glyma.14G222200 |
| PROMOTER                         | Glyma.15G000900 |
| GENE BODY                        | Glyma.15G006900 |
| PROMOTER                         | Glyma.15G015100 |
| GENE BODY                        | Glyma.15G017200 |
| GENE BODY                        | Glyma.15G023800 |
| 5' UTR                           | Glyma.15G025900 |
| 5'UTR                            | Glyma.15G025900 |
| GENE BODY                        | Glyma.15G030400 |
| 5'UTR(71bp); GENE BODY (129bp)   | Glyma.15G030500 |
| PROMOTER                         | Glyma.15G035400 |
| GENE BODY                        | Glyma.15G040100 |
| PROMOTER                         | Glyma.15G046800 |
| PROMOTER                         | Glyma.15G046800 |
| 3'UTR                            | Glyma.15G056300 |
| PROMOTER                         | Glyma.15G056400 |
| GENE BODY                        | Glyma.15G057900 |
| GENE BODY                        | Glyma.15G058700 |



|                                         |                 |
|-----------------------------------------|-----------------|
| 5'UTR(29bp); GENE BODY(171bp)           | Glyma.15G198600 |
| GENE BODY                               | Glyma.15G204500 |
| GENE BODY                               | Glyma.15G204600 |
| GENE BODY                               | Glyma.15G204700 |
| 3'UTR(105bp); GENE BODY (95bp)          | Glyma.15G209000 |
| GENE BODY                               | Glyma.15G212200 |
| GENE BODY                               | Glyma.15G212800 |
| GENE BODY                               | Glyma.15G212800 |
| GENE BODY                               | Glyma.15G213000 |
| GENE BODY                               | Glyma.15G213000 |
| GENE BODY                               | Glyma.15G213200 |
| GENE BODY                               | Glyma.15G214400 |
| GENE BODY                               | Glyma.15G215500 |
| 3'UTR                                   | Glyma.15G219300 |
| GENE BODY                               | Glyma.15G220900 |
| GENE BODY                               | Glyma.15G226200 |
| GENE BODY                               | Glyma.15G232600 |
| PROMOTER                                | Glyma.15G234900 |
| GENE BODY                               | Glyma.15G235900 |
| PROMOTER                                | Glyma.15G240300 |
| PROMOTER(16bp); 5'UTR(107bp); GENE BODY | Glyma.15G240300 |
| PROMOTER(16bp); 5'UTR(107bp); GENE BODY | Glyma.15G240300 |
| GENE BODY                               | Glyma.15G245300 |
| PROMOTER                                | Glyma.15G245400 |
| GENE BODY                               | Glyma.15G246800 |
| GENE BODY                               | Glyma.15G248600 |
| GENE BODY                               | Glyma.15G248600 |
| 5'UTR(40bp); PROMOTER(160bp)            | Glyma.15G248800 |
| 3'UTR(13bp); GENE BODY(173bp)           | Glyma.15G252500 |
| 3'UTR(79bp); GENE BODY (121bp)          | Glyma.15G254100 |
| PROMOTER                                | Glyma.15G255100 |
| PROMOTER                                | Glyma.15G255800 |
| GENE BODY                               | Glyma.15G255900 |
| GENE BODY                               | Glyma.15G271800 |
| 3'UTR(49bp); GENE BODY (151bp)          | Glyma.15G273500 |
| GENE BODY                               | Glyma.15G274000 |



|                                |                 |
|--------------------------------|-----------------|
| GENE BODY                      | Glyma.16G004800 |
| GENE BODY                      | Glyma.16G007000 |
| GENE BODY                      | Glyma.16G009500 |
| PROMOTER                       | Glyma.16G014200 |
| GENE BODY                      | Glyma.16G018300 |
| GENE BODY                      | Glyma.16G025500 |
| GENE BODY                      | Glyma.16G039900 |
| GENE BODY                      | Glyma.16G039900 |
| GENE BODY                      | Glyma.16G040900 |
| GENE BODY                      | Glyma.16G041300 |
| GENE BODY                      | Glyma.16G049600 |
| GENE BODY                      | Glyma.16G052700 |
| GENE BODY                      | Glyma.16G053100 |
| PROMOTER                       | Glyma.16G056800 |
| GENE BODY                      | Glyma.16G057400 |
| 5'UTR(101bp); GENE BODY (99bp) | Glyma.16G058000 |
| GENE BODY                      | Glyma.16G066900 |
| GENE BODY                      | Glyma.16G066900 |
| PROMOTER                       | Glyma.16G067500 |
| GENE BODY                      | Glyma.16G069300 |
| GENE BODY                      | Glyma.16G071500 |
| GENE BODY                      | Glyma.16G073700 |
| 5'UTR (163bp); PROMOTER (37bp) | Glyma.16G077400 |
| PROMOTER                       | Glyma.16G078500 |
| GENE BODY                      | Glyma.16G087100 |
| 3'UTR(55bp); GENE BODY (145bp) | Glyma.16G088100 |
| PROMOTER                       | Glyma.16G088500 |
| PROMOTER                       | Glyma.16G088600 |
| GENE BODY                      | Glyma.16G091400 |
| 3'UTR(197bp); GENE BODY (3bp)  | Glyma.16G092800 |
| GENE BODY                      | Glyma.16G095500 |
| GENE BODY                      | Glyma.16G101800 |
| PROMOTER                       | Glyma.16G111800 |
| PROMOTER                       | Glyma.16G112800 |
| PROMOTER                       | Glyma.16G112800 |
| PROMOTER                       | Glyma.16G113800 |
| GENE BODY                      | Glyma.16G114200 |
| GENE BODY                      | Glyma.16G115200 |
| PROMOTER                       | Glyma.16G115300 |
| GENE BODY                      | Glyma.16G115700 |
| GENE BODY                      | Glyma.16G115700 |
| 3'UTR                          | Glyma.16G127900 |
| 5'UTR(136bp); GENE BODY(64bp)  | Glyma.16G128300 |
| GENE BODY                      | Glyma.16G128600 |

|                                |                 |
|--------------------------------|-----------------|
| GENE BODY                      | Glyma.16G131100 |
| GENE BODY                      | Glyma.16G134700 |
| GENE BODY                      | Glyma.16G135000 |
| 5'UTR(54bp); GENE BODY (146bp) | Glyma.16G136400 |
| 5'UTR(22bp); GENE BODY(178bp)  | Glyma.16G138300 |
| GENE BODY                      | Glyma.16G138300 |
| GENE BODY                      | Glyma.16G141800 |
| GENE BODY                      | Glyma.16G144200 |
| GENE BODY                      | Glyma.16G147000 |
| GENE BODY                      | Glyma.16G148600 |
| GENE BODY                      | Glyma.16G153800 |
| GENE BODY                      | Glyma.16G155700 |
| GENE BODY                      | Glyma.16G159600 |
| PROMOTER                       | Glyma.16G159900 |
| 5'UTR                          | Glyma.16G164700 |
| GENE BODY                      | Glyma.16G172300 |
| GENE BODY                      | Glyma.16G172400 |
| GENE BODY                      | Glyma.16G182700 |
| PROMOTER                       | Glyma.16G183300 |
| PROMOTER                       | Glyma.16G186000 |
| GENE BODY                      | Glyma.16G189700 |
| GENE BODY                      | Glyma.16G190100 |
| GENE BODY                      | Glyma.16G202300 |
| GENE BODY                      | Glyma.17G001100 |
| GENE BODY                      | Glyma.17G010800 |
| GENE BODY                      | Glyma.17G017700 |
| GENE BODY                      | Glyma.17G024000 |
| GENE BODY                      | Glyma.17G024800 |
| GENE BODY                      | Glyma.17G027700 |
| GENE BODY                      | Glyma.17G027700 |
| GENE BODY                      | Glyma.17G033600 |
| GENE BODY                      | Glyma.17G037600 |
| GENE BODY                      | Glyma.17G039300 |
| GENE BODY                      | Glyma.17G041900 |
| GENE BODY                      | Glyma.17G044200 |
| PROMOTER                       | Glyma.17G044800 |
| GENE BODY                      | Glyma.17G057300 |
| GENE BODY                      | Glyma.17G059800 |
| GENE BODY                      | Glyma.17G060300 |
| GENE BODY                      | Glyma.17G060300 |
| GENE BODY                      | Glyma.17G062200 |
| GENE BODY                      | Glyma.17G083300 |
| GENE BODY                      | Glyma.17G083700 |
| GENE BODY                      | Glyma.17G089100 |

|                                  |                 |
|----------------------------------|-----------------|
| PROMOTER                         | Glyma.17G093700 |
| PROMOTER                         | Glyma.17G093700 |
| GENE BODY                        | Glyma.17G094300 |
| GENE BODY                        | Glyma.17G094300 |
| GENE BODY                        | Glyma.17G100600 |
| GENE BODY                        | Glyma.17G105700 |
| GENE BODY                        | Glyma.17G114400 |
| PROMOTER                         | Glyma.17G118400 |
| GENE BODY                        | Glyma.17G125500 |
| GENE BODY                        | Glyma.17G129200 |
| GENE BODY                        | Glyma.17G129900 |
| GENE BODY                        | Glyma.17G129900 |
| GENE BODY                        | Glyma.17G145000 |
| GENE BODY                        | Glyma.17G145500 |
| GENE BODY                        | Glyma.17G145700 |
| PROMOTER                         | Glyma.17G150300 |
| GENE BODY                        | Glyma.17G158200 |
| GENE BODY                        | Glyma.17G160700 |
| PROMOTER                         | Glyma.17G169200 |
| GENE BODY                        | Glyma.17G171400 |
| PROMOTER                         | Glyma.17G171400 |
| PROMOTER                         | Glyma.17G171400 |
| GENE BODY                        | Glyma.17G171600 |
| GENE BODY                        | Glyma.17G173200 |
| GENE BODY                        | Glyma.17G173300 |
| GENE BODY                        | Glyma.17G173300 |
| GENE BODY                        | Glyma.17G181000 |
| GENE BODY                        | Glyma.17G183400 |
| GENE BODY                        | Glyma.17G184300 |
| GENE BODY                        | Glyma.17G184300 |
| GENE BODY(150bp); PROMOTER(50bp) | Glyma.17G184300 |
| PROMOTER                         | Glyma.17G184300 |
| PROMOTER                         | Glyma.17G188600 |
| PROMOTER(93bp); GENE BODY(107bp) | Glyma.17G190200 |
| PROMOTER(93bp); GENE BODY(107bp) | Glyma.17G190200 |
| GENE BODY                        | Glyma.17G191000 |
| 3'UTR                            | Glyma.17G191700 |
| PROMOTER                         | Glyma.17G191800 |
| PROMOTER(172bp); GENE BODY(28bp) | Glyma.17G191800 |
| GENE BODY                        | Glyma.17G199600 |
| GENE BODY                        | Glyma.17G200200 |

|                                  |                 |
|----------------------------------|-----------------|
| GENE BODY                        | Glyma.17G201000 |
| GENE BODY                        | Glyma.17G204000 |
| GENE BODY                        | Glyma.17G204000 |
| PROMOTER                         | Glyma.17G205900 |
| PROMOTER(187bp); GENE BODY(13bp) | Glyma.17G206000 |
| GENE BODY                        | Glyma.17G206400 |
| PROMOTER                         | Glyma.17G207600 |
| GENE BODY                        | Glyma.17G210100 |
| GENE BODY                        | Glyma.17G210100 |
| GENE BODY                        | Glyma.17G212300 |
| GENE BODY                        | Glyma.17G212600 |
| PROMOTER                         | Glyma.17G213600 |
| GENE BODY                        | Glyma.17G215800 |
| 3'UTR(60bp); GENE BODY (140bp)   | Glyma.17G219600 |
| GENE BODY                        | Glyma.17G220800 |
| GENE BODY                        | Glyma.17G222100 |
| GENE BODY                        | Glyma.17G222200 |
| 3'UTR                            | Glyma.17G226600 |
| GENE BODY                        | Glyma.17G235400 |
| GENE BODY                        | Glyma.17G235400 |
| PROMOTER                         | Glyma.17G235400 |
| GENE BODY                        | Glyma.17G244800 |
| PROMOTER                         | Glyma.17G245500 |
| GENE BODY                        | Glyma.17G249100 |
| 3'UTR(98bp); GENE BODY (102bp)   | Glyma.17G250200 |
| GENE BODY                        | Glyma.17G253700 |
| GENE BODY                        | Glyma.17G255500 |
| GENE BODY                        | Glyma.17G257100 |
| GENE BODY                        | Glyma.17G258800 |
| GENE BODY                        | Glyma.18G000100 |
| GENE BODY                        | Glyma.18G000100 |
| GENE BODY                        | Glyma.18G003800 |
| GENE BODY                        | Glyma.18G004600 |
| GENE BODY                        | Glyma.18G004600 |
| GENE BODY                        | Glyma.18G004600 |
| PROMOTER                         | Glyma.18G009100 |
| GENE BODY                        | Glyma.18G011200 |
| GENE BODY                        | Glyma.18G011200 |
| PROMOTER                         | Glyma.18G012700 |
| PROMOTER                         | Glyma.18G013300 |
| PROMOTER                         | Glyma.18G013300 |
| GENE BODY                        | Glyma.18G016200 |
| GENE BODY                        | Glyma.18G019600 |
| GENE BODY                        | Glyma.18G027800 |

|                                   |                 |
|-----------------------------------|-----------------|
| 5'UTR(33bp); GENE BODY(167bp)     | Glyma.18G028900 |
| GENE BODY                         | Glyma.18G055700 |
| PROMOTER                          | Glyma.18G060800 |
| GENE BODY                         | Glyma.18G064900 |
| 3'UTR(15bp); GENE BODY(185bp)     | Glyma.18G068800 |
| 3'UTR(163bp); GENE BODY (37bp)    | Glyma.18G082200 |
| GENE BODY                         | Glyma.18G087700 |
| GENE BODY                         | Glyma.18G093500 |
| GENE BODY                         | Glyma.18G093500 |
| GENE BODY                         | Glyma.18G093600 |
| GENE BODY                         | Glyma.18G093600 |
| GENE BODY                         | Glyma.18G099600 |
| GENE BODY                         | Glyma.18G107900 |
| GENE BODY                         | Glyma.18G109100 |
| GENE BODY                         | Glyma.18G109100 |
| PROMOTER                          | Glyma.18G112200 |
| GENE BODY                         | Glyma.18G115800 |
| 3'UTR                             | Glyma.18G119200 |
| PROMOTER                          | Glyma.18G124900 |
| 3'UTR(27bp); GENE BODY (173bp)    | Glyma.18G127700 |
| GENE BODY                         | Glyma.18G128900 |
| GENE BODY                         | Glyma.18G131200 |
| PROMOTER                          | Glyma.18G133400 |
| GENE BODY                         | Glyma.18G137700 |
| GENE BODY                         | Glyma.18G140800 |
| GENE BODY                         | Glyma.18G140800 |
| PROMOTER                          | Glyma.18G142600 |
| PROMOTER                          | Glyma.18G146700 |
| GENE BODY                         | Glyma.18G147700 |
| GENE BODY                         | Glyma.18G149700 |
| GENE BODY                         | Glyma.18G149700 |
| GENE BODY                         | Glyma.18G154700 |
| GENE BODY                         | Glyma.18G156300 |
| 5'UTR(73bp); PROMOTER(127bp)      | Glyma.18G157300 |
| 3'UTR                             | Glyma.18G159100 |
| GENE BODY                         | Glyma.18G162500 |
| GENE BODY                         | Glyma.18G166600 |
| GENE BODY                         | Glyma.18G166600 |
| GENE BODY                         | Glyma.18G166600 |
| PROMOTER                          | Glyma.18G167500 |
| 5'UTR(43bp); GENE BODY(157bp)     | Glyma.18G170600 |
| PROMOTER                          | Glyma.18G171700 |
| GENE BODY                         | Glyma.18G176400 |
| GENE BODY(69bp); PROMOTER (131bp) | Glyma.18G178600 |

|                                         |                 |
|-----------------------------------------|-----------------|
| PROMOTER                                | Glyma.18G179500 |
| PROMOTER                                | Glyma.18G186900 |
| GENE BODY                               | Glyma.18G195000 |
| GENE BODY                               | Glyma.18G195000 |
| GENE BODY                               | Glyma.18G199800 |
| GENE BODY                               | Glyma.18G199800 |
| GENE BODY                               | Glyma.18G209800 |
| PROMOTER (40bp), 5'UTR(110bp); GENE BOI | Glyma.18G216900 |
| GENE BODY                               | Glyma.18G219100 |
| GENE BODY                               | Glyma.18G230300 |
| GENE BODY                               | Glyma.18G237100 |
| GENE BODY                               | Glyma.18G237200 |
| GENE BODY                               | Glyma.18G241400 |
| GENE BODY                               | Glyma.18G241400 |
| GENE BODY                               | Glyma.18G247300 |
| GENE BODY                               | Glyma.18G251800 |
| GENE BODY                               | Glyma.18G252800 |
| 3'UTR(75bp); GENE BODY (125bp)          | Glyma.18G253400 |
| GENE BODY                               | Glyma.18G279600 |
| GENE BODY                               | Glyma.18G280500 |
| GENE BODY                               | Glyma.18G286300 |
| GENE BODY                               | Glyma.18G296100 |
| GENE BODY                               | Glyma.18G297900 |
| GENE BODY                               | Glyma.18G297900 |
| GENE BODY                               | Glyma.18G299200 |
| GENE BODY                               | Glyma.19G001500 |
| PROMOTER                                | Glyma.19G003900 |
| GENE BODY                               | Glyma.19G006200 |
| PROMOTER                                | Glyma.19G011000 |
| GENE BODY                               | Glyma.19G012300 |
| GENE BODY                               | Glyma.19G012900 |
| GENE BODY                               | Glyma.19G016300 |
| GENE BODY                               | Glyma.19G023400 |
| PROMOTER                                | Glyma.19G024600 |
| GENE BODY                               | Glyma.19G028800 |
| GENE BODY                               | Glyma.19G029000 |
| PROMOTER                                | Glyma.19G031100 |
| GENE BODY                               | Glyma.19G040200 |
| GENE BODY                               | Glyma.19G040800 |
| GENE BODY                               | Glyma.19G043600 |
| GENE BODY                               | Glyma.19G043600 |
| GENE BODY                               | Glyma.19G043600 |
| PROMOTER(3bp); GENE BODY(197bp)         | Glyma.19G043600 |
| GENE BODY                               | Glyma.19G056700 |

|                                |                 |
|--------------------------------|-----------------|
| 3'UTR(44bp); GENE BODY(9bp)    | Glyma.19G059600 |
| GENE BODY                      | Glyma.19G060900 |
| GENE BODY                      | Glyma.19G060900 |
| GENE BODY                      | Glyma.19G061900 |
| GENE BODY                      | Glyma.19G066800 |
| GENE BODY                      | Glyma.19G067100 |
| GENE BODY                      | Glyma.19G076400 |
| GENE BODY                      | Glyma.19G077100 |
| 3'UTR(5bp); GENE BODY (195bp)  | Glyma.19G077200 |
| GENE BODY                      | Glyma.19G082800 |
| GENE BODY                      | Glyma.19G086600 |
| GENE BODY                      | Glyma.19G095000 |
| PROMOTER                       | Glyma.19G097300 |
| GENE BODY                      | Glyma.19G102500 |
| GENE BODY                      | Glyma.19G104300 |
| 3'UTR(44bp); GENE BODY (156bp) | Glyma.19G116000 |
| GENE BODY                      | Glyma.19G117600 |
| GENE BODY                      | Glyma.19G117700 |
| 3'UTR                          | Glyma.19G124000 |
| 3'UTR                          | Glyma.19G124000 |
| GENE BODY                      | Glyma.19G124700 |
| GENE BODY                      | Glyma.19G141800 |
| GENE BODY                      | Glyma.19G149500 |
| 3'UTR(16bp); GENE BODY (184bp) | Glyma.19G152200 |
| 3'UTR(57bp); GENE BODY (143bp) | Glyma.19G155900 |
| PROMOTER                       | Glyma.19G156500 |
| GENE BODY                      | Glyma.19G170700 |
| GENE BODY                      | Glyma.19G175600 |
| GENE BODY                      | Glyma.19G175900 |
| GENE BODY                      | Glyma.19G178700 |
| GENE BODY                      | Glyma.19G179300 |
| GENE BODY                      | Glyma.19G180500 |
| PROMOTER                       | Glyma.19G184200 |
| 3'UTR                          | Glyma.19G185300 |
| 3'UTR(108bp); GENE BODY (92bp) | Glyma.19G185900 |
| GENE BODY                      | Glyma.19G187300 |
| PROMOTER                       | Glyma.19G187400 |
| 3'UTR(49bp)                    | Glyma.19G192300 |
| GENE BODY                      | Glyma.19G208300 |
| GENE BODY                      | Glyma.19G213700 |
| 5'UTR(43bp); PROMOTER (157bp)  | Glyma.19G217000 |
| GENE BODY                      | Glyma.19G221200 |
| PROMOTER                       | Glyma.19G224000 |
| GENE BODY                      | Glyma.19G226000 |

|                                |                 |
|--------------------------------|-----------------|
| GENE BODY                      | Glyma.19G230000 |
| GENE BODY                      | Glyma.19G239400 |
| GENE BODY                      | Glyma.19G239700 |
| GENE BODY                      | Glyma.19G247000 |
| GENE BODY                      | Glyma.19G250600 |
| 3'UTR(39bp); GENE BODY (161bp) | Glyma.19G251400 |
| GENE BODY                      | Glyma.19G251400 |
| GENE BODY                      | Glyma.19G251700 |
| GENE BODY                      | Glyma.19G251800 |
| 3'UTR(164bp)                   | Glyma.19G252900 |
| GENE BODY                      | Glyma.19G256500 |
| GENE BODY                      | Glyma.19G259200 |
| GENE BODY                      | Glyma.20G000700 |
| 5'UTR(39bp); GENE BODY (161bp) | Glyma.20G005000 |
| PROMOTER                       | Glyma.20G008000 |
| PROMOTER                       | Glyma.20G010700 |
| GENE BODY                      | Glyma.20G013500 |
| GENE BODY                      | Glyma.20G017400 |
| 5'UTR                          | Glyma.20G024300 |
| GENE BODY                      | Glyma.20G025100 |
| 3'UTR(155bp); GENE BODY (45bp) | Glyma.20G027500 |
| PROMOTER                       | Glyma.20G027600 |
| PROMOTER                       | Glyma.20G030800 |
| GENE BODY                      | Glyma.20G032200 |
| 5'UTR(42bp); GENE BODY(158bp)  | Glyma.20G040900 |
| PROMOTER                       | Glyma.20G046500 |
| 5' UTR                         | Glyma.20G047800 |
| PROMOTER                       | Glyma.20G047900 |
| GENE BODY                      | Glyma.20G054500 |
| GENE BODY                      | Glyma.20G056500 |
| GENE BODY                      | Glyma.20G058500 |
| 3'UTR                          | Glyma.20G058600 |
| GENE BODY                      | Glyma.20G060800 |
| GENE BODY                      | Glyma.20G064100 |
| GENE BODY                      | Glyma.20G070800 |
| GENE BODY                      | Glyma.20G071200 |
| GENE BODY                      | Glyma.20G079600 |
| 3'UTR(43bp); GENE BODY (157bp) | Glyma.20G079800 |
| GENE BODY                      | Glyma.20G086700 |
| PROMOTER                       | Glyma.20G094700 |
| GENE BODY                      | Glyma.20G104000 |
| 3'UTR                          | Glyma.20G104100 |
| GENE BODY                      | Glyma.20G107600 |
| GENE BODY                      | Glyma.20G110600 |



|           |                 |
|-----------|-----------------|
| GENE BODY | Glyma.20G112200 |
| GENE BODY | Glyma.20G116900 |
| PROMOTER  | Glyma.20G118000 |
| PROMOTER  | Glyma.20G120500 |
| GENE BODY | Glyma.20G130800 |
| PROMOTER  | Glyma.20G131200 |
| 3'UTR     | Glyma.20G135900 |
| PROMOTER  | Glyma.20G140100 |
| GENE BODY | Glyma.20G146600 |
| GENE BODY | Glyma.20G149100 |
| GENE BODY | Glyma.20G149200 |
| GENE BODY | Glyma.20G153600 |
| 3'UTR     | Glyma.20G154300 |
| PROMOTER  | Glyma.20G162200 |
| GENE BODY | Glyma.20G165400 |
| GENE BODY | Glyma.20G166000 |
| GENE BODY | Glyma.20G173200 |
| GENE BODY | Glyma.20G178600 |
| 5'UTR     | Glyma.20G182900 |
| GENE BODY | Glyma.20G185600 |
| GENE BODY | Glyma.20G185800 |
| GENE BODY | Glyma.20G187800 |
| GENE BODY | Glyma.20G189700 |
| GENE BODY | Glyma.20G195700 |
| GENE BODY | Glyma.20G198700 |
| GENE BODY | Glyma.20G199500 |
| GENE BODY | Glyma.20G208700 |
| GENE BODY | Glyma.20G216900 |
| GENE BODY | Glyma.20G217700 |
| GENE BODY | Glyma.20G218900 |
| GENE BODY | Glyma.20G233700 |
| PROMOTER  | Glyma.20G235400 |
| PROMOTER  | Glyma.20G241600 |
| GENE BODY | Glyma.20G244700 |
| GENE BODY | Glyma.20G248000 |
| GENE BODY | Glyma.U010500   |
| GENE BODY | Glyma.U010800   |
| PROMOTER  | Glyma.U013900   |
| PROMOTER  | Glyma.U024600   |
| GENE BODY | Glyma.U032300   |

|           |               |
|-----------|---------------|
| GENE BODY | Glyma.U032500 |
| PROMOTER  | Glyma.U032500 |
| GENE BODY | Glyma.U034000 |
| PROMOTER  | Glyma.U035000 |
| PROMOTER  | Glyma.U035000 |
| GENE BODY | Glyma.U036800 |

---

| GENE ANNOTATION                                    | Methylation Difference | q value     | P value     |
|----------------------------------------------------|------------------------|-------------|-------------|
| gamma-glutamyl transpeptidase 4                    | -37.99867021           | 0.00540647  | 1.10102E-05 |
| Pectin lyase-like superfamily protein              | -40.53030303           | 2.77707E-05 | 1.53347E-08 |
| hexokinase 2                                       | -34.41134752           | 0.00510403  | 1.00911E-05 |
| hexokinase 2                                       | -51.85185185           | 0.009566348 | 2.35016E-05 |
| N/A                                                | -49.48453608           | 3.19341E-14 | 1.05384E-18 |
| N/A                                                | -37.25490196           | 0.000219161 | 1.97285E-07 |
| N/A                                                | -58.67924528           | 2.14544E-06 | 6.16749E-10 |
| UDP-glucosyl transferase 85A3                      | -49.47368421           | 0.000214557 | 5.23789E-07 |
| kinesin like protein for actin based chloroplast   | -39.47368421           | 0.005368098 | 1.08927E-05 |
| Alkaline-phosphatase-like family protein           | -97.05882353           | 1.25008E-06 | 3.34099E-10 |
| N/A                                                | -41.93245779           | 0.000889943 | 1.00636E-06 |
| SIN3-like 3                                        | -41.93245779           | 0.000889943 | 1.00636E-06 |
| myb-like transcription factor family protein       | -42.30769231           | 0.00867934  | 8.55033E-05 |
| N/A                                                | -60.625                | 0.005314371 | 1.06512E-05 |
| SOUL heme-binding family protein                   | -88.23529412           | 1.54212E-05 | 6.34433E-09 |
| Pentatricopeptide repeat (PPR) superfamily protein | -32.60869565           | 0.003464669 | 6.03944E-06 |
| Squamosa promoter-binding protein-like (SBI)       | -100                   | 0.005353107 | 1.08251E-05 |
| Prolyl oligopeptidase family protein               | -100                   | 0.001933999 | 2.83514E-06 |
| N/A                                                | -37.52631579           | 0.000734571 | 9.25555E-07 |
| N/A                                                | -39.40813073           | 8.69842E-08 | 1.91899E-11 |
| N/A                                                | -100                   | 0.000277356 | 2.24346E-07 |
| Phosphoglycerate mutase family protein             | -100                   | 0.000277356 | 2.24346E-07 |
| Nucleoporin autopeptidase                          | -34.84341382           | 0.00106169  | 1.5405E-06  |
| N/A                                                | -26.9620391            | 0.004126839 | 2.93584E-05 |
| Nucleic acid-binding, OB-fold-like protein         | -28.57142857           | 0.001233443 | 1.89696E-06 |
| Nucleic acid-binding, OB-fold-like protein         | -34.99128616           | 7.52347E-14 | 2.81381E-18 |
| Nucleic acid-binding, OB-fold-like protein         | -27.27272727           | 9.31835E-09 | 1.603E-12   |
| Nucleic acid-binding, OB-fold-like protein         | -33.20087809           | 1.541E-19   | 1.92113E-24 |
| Nucleic acid-binding, OB-fold-like protein         | -40                    | 0.000703599 | 7.25482E-07 |
| N/A                                                | -28.07766677           | 1.90E-06    | 1.40716E-09 |
| Metal-dependent phosphohydrolase                   | -38.18272095           | 0.001021096 | 1.45485E-06 |
| ARM repeat superfamily protein                     | -76.47058824           | 0.000181646 | 1.35073E-07 |
| Zinc finger (CCCH-type) family protein             | -34.36363636           | 0.000762327 | 8.17325E-07 |
| Protein of unknown function (DUF604)               | -61.33587786           | 0.000212198 | 1.88788E-07 |
| N/A                                                | -84.65909091           | 0.000157021 | 1.29182E-07 |
| glucose-6-phosphate/phosphate translocator         | -34.26332288           | 0.000703795 | 7.34042E-07 |
| glucose-6-phosphate/phosphate translocator         | -29.71846847           | 3.68684E-11 | 2.92001E-15 |
| glucose-6-phosphate/phosphate translocator         | -33.24863884           | 0.000422084 | 4.52396E-07 |
| STAS domain / Sulfate transporter family           | -28.35820896           | 0.005104314 | 1.36236E-05 |
| TBP-associated factor 15                           | -27.77777778           | 0.006638408 | 2.02113E-05 |
| TBP-associated factor 15                           | -40                    | 0.004244872 | 7.82592E-06 |
| receptor like protein 6                            | -73.07692308           | 0.00012701  | 9.93217E-08 |

|                                                |              |             |             |
|------------------------------------------------|--------------|-------------|-------------|
| receptor like protein 6                        | -32.25806452 | 2.10036E-06 | 7.3091E-10  |
| receptor like protein 6                        | -60.28514589 | 9.08552E-22 | 1.67033E-26 |
| receptor like protein 6                        | -74.07407407 | 0.006111082 | 1.28843E-05 |
| N/A                                            | -53.75722543 | 2.43E-11    | 3.05611E-15 |
| N/A                                            | -81.25       | 3.22832E-07 | 7.1734E-11  |
| Nucleotidyltransferase family protein          | -31.66666667 | 0.000521764 | 1.70647E-06 |
| N/A                                            | -91.66666667 | 0.001242917 | 1.55316E-06 |
| arginase                                       | -70.1754386  | 0.000274874 | 2.21331E-07 |
| N/A                                            | -80          | 0.000425096 | 3.81258E-07 |
| N/A                                            | -25.33960293 | 0.004282959 | 1.05427E-05 |
| N/A                                            | -37.48902546 | 3.23074E-25 | 1.89539E-30 |
| N/A                                            | -52.17391304 | 3.61557E-13 | 1.64389E-17 |
| RNA-binding (RRM/RBD/RNP motifs) family p      | -52.17391304 | 3.61557E-13 | 1.64389E-17 |
| RNA-binding (RRM/RBD/RNP motifs) family p      | -27.53623188 | 0.000213257 | 1.9085E-07  |
| RNA-binding (RRM/RBD/RNP motifs) family p      | -37.48902546 | 3.23074E-25 | 1.89539E-30 |
| protein binding                                | -27.53623188 | 0.000213257 | 1.9085E-07  |
| protein binding                                | -52.17391304 | 3.61557E-13 | 1.64389E-17 |
| protein binding                                | -37.48902546 | 3.23074E-25 | 1.89539E-30 |
| xyloglucanase 113                              | -83.83380205 | 4.27E-48    | 2.17042E-54 |
| xyloglucanase 113                              | -51.94424065 | 0.003368248 | 7.48107E-06 |
| Histidine kinase-, DNA gyrase B-, and HSP90-I  | -33.46613546 | 0.000651776 | 6.58117E-07 |
| Histidine kinase-, DNA gyrase B-, and HSP90-I  | -30.26819923 | 0.005036561 | 3.88024E-05 |
| RNA polymerase II large subunit                | -70.83333333 | 0.000213835 | 1.63087E-07 |
| calcium-dependent protein kinase 16            | -56.52173913 | 5.08029E-05 | 2.77928E-08 |
| Phosphatidylinositol 3- and 4-kinase family p  | -25.69892473 | 0.007356445 | 6.72406E-05 |
| Lactoylglutathione lyase / glyoxalase I family | -28.07129094 | 3.78E-12    | 3.33967E-16 |
| Lactoylglutathione lyase / glyoxalase I family | -27.89048866 | 0.00183603  | 9.35492E-06 |
| DNA binding;zinc ion binding;nucleic acid bin  | -84.02985075 | 7.04898E-05 | 4.19747E-08 |
| N/A                                            | -75          | 0.004817982 | 9.29591E-06 |
| Transducin/WD40 repeat-like superfamily pro    | -25.52700415 | 5.31329E-05 | 8.81033E-08 |
| cytochrome P450, family 81, subfamily D, pol   | -32.12264151 | 6.59E-08    | 2.4484E-11  |
| plastid ribosomal protein l11                  | -31.11367719 | 6.62E-12    | 6.51884E-16 |
| N/A                                            | -35.10278428 | 0.000804136 | 1.047E-06   |
| SU(VAR)3-9 homolog 6                           | -39.47368421 | 0.004343744 | 8.06555E-06 |
| RGPR-related                                   | -47.05882353 | 0.002018826 | 2.99947E-06 |
| alpha/beta-Hydrolases superfamily protein      | -27.72277228 | 0.000310928 | 2.57869E-07 |
| THUMP domain-containing protein                | -30.97345133 | 6.66226E-06 | 2.36957E-09 |
| RING/FYVE/PHD zinc finger superfamily prote    | -90.90909091 | 0.001555015 | 2.07089E-06 |
| CVP2 like 1                                    | -63.63636364 | 0.000835286 | 9.35975E-07 |
| Acyl-CoA N-acyltransferase with RING/FYVE/I    | -56.03492553 | 0.000299513 | 2.45357E-07 |
| somatic embryogenesis receptor-like kinase 1   | -67.89772727 | 0.000395776 | 4.17858E-07 |
| somatic embryogenesis receptor-like kinase 1   | -92.45283019 | 1.47653E-11 | 1.02866E-15 |
| somatic embryogenesis receptor-like kinase 1   | -38.11398575 | 0.000376343 | 1.10204E-06 |
| histone deacetylase 1                          | -71.21212121 | 0.006813334 | 2.09842E-05 |

|                                               |              |             |             |
|-----------------------------------------------|--------------|-------------|-------------|
| Tetratricopeptide repeat (TPR)-like superfam  | -91.66666667 | 0.004921546 | 9.61483E-06 |
| RNA-binding (RRM/RBD/RNP motifs) family p     | -25.24565382 | 6.0915E-05  | 1.04223E-07 |
| ABC transporter 1                             | -32.11038961 | 0.004121823 | 7.53011E-06 |
| Concanavalin A-like lectin protein kinase fam | -28.09237583 | 0.004623602 | 1.1785E-05  |
| N/A                                           | -83.33333333 | 0.003019842 | 5.0293E-06  |
| zinc ion binding                              | -40          | 0.00494168  | 3.77477E-05 |
| serine acetyltransferase 3;2                  | -37.39809783 | 9.00353E-05 | 5.59245E-08 |
| TSL-kinase interacting protein 1              | -96.96969697 | 1.40706E-05 | 5.73713E-09 |
| FAD/NAD(P)-binding oxidoreductase family p    | -72.58064516 | 0.000428819 | 3.85855E-07 |
| Pyridoxal phosphate (PLP)-dependent transfe   | -44.70066519 | 0.000293831 | 2.39396E-07 |
| N/A                                           | -75          | 0.002079785 | 3.11582E-06 |
| Mitochondrial substrate carrier family protei | -59.41043084 | 1.94386E-05 | 8.48179E-09 |
| microtubule-associated proteins 70-2          | -28.71590153 | 0.000142361 | 9.86571E-08 |
| HEAT repeat-containing protein                | -74.72527473 | 0.001275399 | 1.60591E-06 |
| DNA LIGASE 6                                  | -67.35632184 | 0.002992509 | 1.86277E-05 |
| phenylalanyl-tRNA synthetase class IIc family | -79.36507937 | 0.001417777 | 1.84133E-06 |
| Ribosomal protein L12/ ATP-dependent Clp p    | -100         | 0.00014754  | 1.03544E-07 |
| Transmembrane amino acid transporter fami     | -26.86567164 | 0.002172447 | 4.09378E-06 |
| methionine aminopeptidase 1B                  | -43.86733417 | 0.004770682 | 9.17316E-06 |
| NAC (No Apical Meristem) domain transcripti   | -69.64285714 | 0.003941291 | 7.12658E-06 |
| plant U-box 26                                | -25.5089717  | 0.008115221 | 7.76339E-05 |
| N/A                                           | -29.76190476 | 6.38129E-08 | 1.1044E-11  |
| N/A                                           | -41.37931034 | 1.20754E-05 | 4.7962E-09  |
| peroxisomal adenine nucleotide carrier 1      | -46.03174603 | 0.004452599 | 8.36236E-06 |
| Transducin/WD40 repeat-like superfamily pr    | -30.14090259 | 0.007160035 | 2.24435E-05 |
| Pentatricopeptide repeat (PPR) superfamily p  | -31.63265306 | 0.001500738 | 7.13074E-06 |
| phosphoenolpyruvate carboxylase 4             | -42.00971984 | 2.05118E-05 | 2.66259E-08 |
| N/A                                           | -37.66039029 | 8.71878E-13 | 5.95364E-17 |
| N/A                                           | -28.21081358 | 1.4755E-05  | 7.20785E-09 |
| N/A                                           | -37.33031674 | 9.291E-06   | 3.49424E-09 |
| 2-oxoglutarate (2OG) and Fe(II)-dependent o   | -25.34246575 | 0.007649235 | 7.12959E-05 |
| N/A                                           | -25.89996814 | 6.28127E-07 | 1.83527E-10 |
| N/A                                           | -37.26133076 | 0.002967841 | 6.24153E-06 |
| N/A                                           | -39.52861953 | 1.6048E-16  | 3.88365E-21 |
| N/A                                           | -25.89996814 | 6.28127E-07 | 1.83527E-10 |
| N/A                                           | -37.26133076 | 0.002967841 | 6.24153E-06 |
| N/A                                           | -33.34991708 | 0.006922846 | 1.52166E-05 |
| N/A                                           | -92.30769231 | 0.004021801 | 9.61483E-06 |
| galacturonosyltransferase 6                   | -60          | 0.000719383 | 7.61529E-07 |
| alpha/beta-Hydrolases superfamily protein     | -64.17910448 | 1.39619E-13 | 7.97546E-18 |
| alpha/beta-Hydrolases superfamily protein     | -77.6119403  | 2.00496E-14 | 6.46939E-19 |
| methylcrotonyl-CoA carboxylase alpha chain,   | -95.23809524 | 0.000301963 | 2.48015E-07 |
| Zinc knuckle (CCHC-type) family protein       | -30.89393939 | 0.003303984 | 2.14374E-05 |
| Tetratricopeptide repeat (TPR)-like superfam  | -36.53846154 | 0.000221818 | 1.70802E-07 |

|                                               |              |             |             |
|-----------------------------------------------|--------------|-------------|-------------|
| basic region/leucine zipper motif 60          | -32.78688525 | 0.000377032 | 3.29258E-07 |
| N/A                                           | -37.93103448 | 0.00496173  | 9.72244E-06 |
| P-loop containing nucleoside triphosphate hy  | -26.67390125 | 0.001742711 | 3.02304E-06 |
| Protein of unknown function, DUF593           | -100         | 0.000703795 | 7.39602E-07 |
| N/A                                           | -38.8712522  | 0.000134474 | 9.17121E-08 |
| Thioesterase superfamily protein              | -80.625      | 7.49481E-05 | 1.35694E-07 |
| P-loop containing nucleoside triphosphate hy  | -78.57142857 | 0.002670807 | 4.29893E-06 |
| nudix hydrolase homolog 23                    | -57.5        | 0.001305715 | 1.65653E-06 |
| NIMA-related kinase 2                         | -55.44715447 | 2.5401E-05  | 1.38594E-08 |
| homeobox protein 22                           | -43.81377551 | 0.004526603 | 1.14635E-05 |
| Protein of unknown function (DUF288)          | -73.17073171 | 0.005653257 | 1.16786E-05 |
| Cyclin-like family protein                    | -53.84615385 | 0.000848064 | 9.5216E-07  |
| MAP kinase kinase 6                           | -38.63636364 | 0.00164928  | 2.23876E-06 |
| S-adenosyl-L-methionine-dependent methylt     | -73.91304348 | 0.007914422 | 1.81606E-05 |
| Nucleic acid-binding, OB-fold-like protein    | -90.69767442 | 7.37599E-05 | 5.13357E-08 |
| RING-H2 group F2A                             | -38.23529412 | 5.94643E-06 | 2.47293E-09 |
| N/A                                           | -34.28571429 | 0.005815286 | 1.2085E-05  |
| chaperone protein dnaJ-related                | -35.13513514 | 0.004312652 | 7.98567E-06 |
| Tetratricopeptide repeat (TPR)-like superfam  | -70.34632035 | 5.94491E-10 | 5.79833E-14 |
| Pseudouridine synthase family protein         | -43.5483871  | 0.007691319 | 1.74682E-05 |
| Golgi-body localisation protein domain ;RNA   | -100         | 0.001933999 | 2.83514E-06 |
| indole-3-acetic acid inducible 9              | -52.38095238 | 0.009485397 | 2.32192E-05 |
| N/A                                           | -25.37252056 | 6.89461E-08 | 1.20841E-11 |
| ribosomal protein S2                          | -83.09659091 | 9.4024E-06  | 3.54637E-09 |
| Plant protein of unknown function (DUF828)    | -39.03372646 | 8.26E-07    | 5.12771E-10 |
| Pseudouridine synthase family protein         | -30.95085568 | 0.00035838  | 1.03233E-06 |
| nucleotide binding;protein binding            | -73.91304348 | 2.79341E-06 | 8.46824E-10 |
| Haloacid dehalogenase-like hydrolase (HAD) :  | -77.77777778 | 0.000930973 | 1.06641E-06 |
| E3 ubiquitin ligase, putative                 | -85.65217391 | 0.001513714 | 2.49565E-06 |
| Xanthine/uracil permease family protein       | -100         | 0.000796198 | 8.74075E-07 |
| serine/threonine protein phosphatase 2A 55    | -27.11864407 | 0.007432213 | 1.67435E-05 |
| Protein phosphatase 2A regulatory B subunit   | -61.40350877 | 0.000156893 | 1.1241E-07  |
| UDP-Glycosyltransferase superfamily protein   | -50.15698587 | 1.83355E-05 | 2.30839E-08 |
| Ethylene insensitive 3 family protein         | -63.15789474 | 0.004931351 | 9.6376E-06  |
| early nodulin-like protein 18                 | -46.26370625 | 4.06E-20    | 5.15698E-25 |
| early nodulin-like protein 18                 | -76.92307692 | 1.5835E-06  | 5.33371E-10 |
| auxin response factor 6                       | -100         | 0.000356554 | 3.05926E-07 |
| protodermal factor 1                          | -33.63095238 | 0.009357303 | 3.33429E-05 |
| hydroxyproline-rich glycoprotein family prote | -91.30434783 | 3.03144E-06 | 9.4007E-10  |
| ENHANCED DOWNY MILDEW 2                       | -39.38215103 | 0.005552448 | 1.13808E-05 |
| multidrug resistance-associated protein 3     | -76.47058824 | 0.007749937 | 1.76354E-05 |
| DNAJ heat shock N-terminal domain-containi    | -67.14975845 | 0.001405002 | 1.8165E-06  |
| N/A                                           | -32.52608048 | 3.46E-09    | 8.2963E-13  |
| Nucleotide-sugar transporter family protein   | -25.92935479 | 0.002764235 | 4.49301E-06 |

|                                                |              |             |             |
|------------------------------------------------|--------------|-------------|-------------|
| SEC7-like guanine nucleotide exchange family   | -76.92307692 | 0.000765705 | 8.2338E-07  |
| N/A                                            | -38.7755102  | 0.003689797 | 8.49149E-06 |
| RAS associated with diabetes protein 51C       | -100         | 1.90164E-07 | 3.91869E-11 |
| Protein of unknown function (DUF565)           | -38.80034773 | 0.000411704 | 1.24385E-06 |
| Protein of unknown function (DUF565)           | -44.9376947  | 0.006687833 | 5.84878E-05 |
| high mobility group                            | -58.72909699 | 0.000457565 | 4.18097E-07 |
| Preprotein translocase Sec, Sec61-beta subur   | -27.04100677 | 0.00032695  | 3.28019E-07 |
| Protein phosphatase 2C family protein          | -29.47368421 | 9.23401E-05 | 5.79656E-08 |
| P-loop containing nucleoside triphosphate hy   | -30.64516129 | 1.29933E-08 | 2.2949E-12  |
| N/A                                            | -45.11241447 | 0.00938922  | 3.34949E-05 |
| Rhodanese/Cell cycle control phosphatase su    | -72.72727273 | 0.008355196 | 2.8191E-05  |
| regulatory particle AAA-ATPase 2A              | -47.22222222 | 0.003908528 | 7.04246E-06 |
| BCL-2-associated athanogene 6                  | -46.66666667 | 0.00495282  | 1.30847E-05 |
| rubisco activase                               | -30.23255814 | 5.36E-12    | 5.1136E-16  |
| mRNA capping enzyme family protein             | -50.90909091 | 0.004776659 | 9.19516E-06 |
| defective in exine formation protein (DEX1)    | -69.04761905 | 0.000169544 | 1.23712E-07 |
| RHOMBOID-like 1                                | -50          | 0.009259271 | 2.24824E-05 |
| E3 Ubiquitin ligase family protein             | -63.1372549  | 0.009984992 | 2.48229E-05 |
| Protein kinase superfamily protein             | -46.2962963  | 0.003213284 | 6.98768E-06 |
| Cellulose-synthase-like C6                     | -100         | 4.05E-22    | 3.49343E-27 |
| Chloroplast Ycf2;ATPase, AAA type, core        | -34.97432606 | 1.00391E-07 | 1.86997E-11 |
| Chloroplast Ycf2;ATPase, AAA type, coreMET     | -38.07950192 | 1.23977E-10 | 1.34314E-14 |
| N/A                                            | -41.14583333 | 0.002814342 | 1.70141E-05 |
| hAT dimerisation domain-containing protein     | -94.28571429 | 2.12027E-06 | 6.07959E-10 |
| DYNAMIN-like 1E                                | -34.95297806 | 0.000354245 | 1.01682E-06 |
| basic helix-loop-helix (bHLH) DNA-binding su   | -67.9791546  | 0.003976657 | 9.46497E-06 |
| N/A                                            | -27.47092057 | 0.003932664 | 9.30346E-06 |
| Plant protein of unknown function (DUF247)     | -36.90360273 | 0.000201432 | 4.8121E-07  |
| alpha/beta-Hydrolases superfamily protein      | -70.37037037 | 0.0048666   | 9.40399E-06 |
| transcription regulators                       | -39.840842   | 1.93E-16    | 4.99224E-21 |
| disproportionating enzyme 2                    | -83.72093023 | 0.00037888  | 3.3246E-07  |
| lupeol synthase 2                              | -26.02678571 | 0.003070238 | 1.93314E-05 |
| TGACG motif-binding factor 6                   | -72.81553398 | 0.000369017 | 3.20223E-07 |
| P-loop containing nucleoside triphosphate hy   | -63.88888889 | 0.001173157 | 1.42039E-06 |
| N/A                                            | -61.53846154 | 0.005825239 | 1.21236E-05 |
| Transmembrane proteins 14C                     | -31.66410601 | 0.000111168 | 8.50027E-08 |
| curculin-like (mannose-binding) lectin family  | -90          | 0.008505711 | 2.01037E-05 |
| N/A                                            | -31.42857143 | 0.002345145 | 3.64596E-06 |
| spindle pole body component 98                 | -75.30864198 | 0.002849701 | 4.67489E-06 |
| Disease resistance-responsive (dirigent-like p | -26.01455698 | 0.000149301 | 3.26192E-07 |
| alpha/beta-Hydrolases superfamily protein      | -66.95116169 | 5.19212E-05 | 3.33749E-08 |
| FUS3-complementing gene 1                      | -30.14705882 | 1.18264E-06 | 3.12219E-10 |
| FASCICLIN-like arabinogalactan-protein 11      | -44.93557087 | 4.94E-17    | 1.15309E-21 |
| FASCICLIN-like arabinogalactan-protein 11      | -50.67126966 | 0.000815725 | 9.05981E-07 |

|                                               |              |             |             |
|-----------------------------------------------|--------------|-------------|-------------|
| Pyruvate kinase family protein                | -90          | 0.008505711 | 2.01037E-05 |
| RHOMBOID-like protein 15                      | -27.77991207 | 1.55638E-08 | 2.19141E-12 |
| Chaperone DnaJ-domain superfamily protein     | -76.92307692 | 0.000382766 | 3.37399E-07 |
| N/A                                           | -29.41176471 | 0.000672504 | 6.84616E-07 |
| N/A                                           | -27.11111111 | 4.62838E-12 | 2.81717E-16 |
| N/A                                           | -39.04761905 | 5.12743E-08 | 1.04702E-11 |
| Protein phosphatase 2C family protein         | -39.04761905 | 5.12743E-08 | 1.04702E-11 |
| Protein phosphatase 2C family protein         | -29.41176471 | 0.000672504 | 6.84616E-07 |
| Protein phosphatase 2C family protein         | -27.11111111 | 4.62838E-12 | 2.81717E-16 |
| Protein of unknown function (DUF3511)         | -27.62414511 | 0.000388687 | 1.15023E-06 |
| regulatory particle triple-A ATPase 5A        | -47.22772277 | 0.00047655  | 4.39476E-07 |
| RNA polymerase II transcription mediators     | -68          | 0.000331513 | 2.78606E-07 |
| Li-tolerant lipase 1                          | -43.52501169 | 2.29482E-05 | 3.07559E-08 |
| Glycosyl hydrolase superfamily protein        | -70.83333333 | 0.001659154 | 2.25793E-06 |
| Ankyrin repeat family protein                 | -36.36363636 | 0.000631379 | 6.29239E-07 |
| FMN-linked oxidoreductases superfamily pro    | -27.30141309 | 0.007329095 | 6.68789E-05 |
| ATPase, F0/V0 complex, subunit C protein      | -27.30141309 | 0.007329095 | 6.68789E-05 |
| Sec14p-like phosphatidylinositol transfer fam | -73.91304348 | 0.007914422 | 1.81606E-05 |
| Arabidopsis protein of unknown function (DU   | -27.40925886 | 7.02E-12    | 6.98378E-16 |
| Galactose oxidase/kelch repeat superfamily p  | -66          | 0.000910494 | 1.03828E-06 |
| Protein kinase superfamily protein            | -69.13580247 | 0.005472757 | 1.11773E-05 |
| N/A                                           | -28.63636364 | 1.01E-07    | 4.08327E-11 |
| glycosyl hydrolase 9B7                        | -66          | 0.001920592 | 2.72802E-06 |
| Plant protein of unknown function (DUF869)    | -48.8372093  | 0.006699323 | 1.4606E-05  |
| xylem bark cysteine peptidase 3               | -39.47368421 | 0.009184995 | 2.22279E-05 |
| N/A                                           | -64.28571429 | 0.004876312 | 9.44718E-06 |
| RING/U-box superfamily protein                | -55          | 0.000703795 | 7.37662E-07 |
| RING/U-box superfamily protein                | -81.81818182 | 5.77169E-05 | 3.27946E-08 |
| homology to ABI1                              | -100         | 1.28339E-05 | 5.16698E-09 |
| KNOTTED1-like homeobox gene 3                 | -37.82230806 | 1.00E-06    | 6.47962E-10 |
| tyrosyl-DNA phosphodiesterase-related         | -68.33333333 | 0.002539761 | 4.02655E-06 |
| Phox (PX) domain-containing protein           | -31.73935891 | 0.006206255 | 5.25008E-05 |
| N/A                                           | -100         | 0.001933999 | 2.83514E-06 |
| Ribosomal protein S5 family protein           | -28.40153195 | 3.81865E-05 | 2.27912E-08 |
| Putative serine esterase family protein       | -98          | 6.01066E-07 | 1.459E-10   |
| CBL-interacting protein kinase 8              | -55          | 0.002434174 | 3.82899E-06 |
| Rho GTPase activation protein (RhoGAP) with   | -60          | 0.001841775 | 2.57974E-06 |
| binding                                       | -29.67687075 | 2.53661E-09 | 3.73074E-13 |
| binding                                       | -39.00069396 | 0.001134112 | 1.69479E-06 |
| binding                                       | -72.22222222 | 0.000903423 | 1.02512E-06 |
| ubiquitin-protein ligase 1                    | -33.9569161  | 3.89002E-07 | 1.05997E-10 |
| ubiquitin-protein ligase 1                    | -31.55011655 | 0.000144838 | 1.16401E-07 |
| APR-like 4                                    | -31.41928494 | 0.001524982 | 2.51924E-06 |
| alpha/beta-Hydrolases superfamily protein     | -25.3968254  | 0.005467109 | 4.36687E-05 |



|                                              |              |             |             |
|----------------------------------------------|--------------|-------------|-------------|
| N/A                                          | -91.66666667 | 0.004921546 | 9.61483E-06 |
| chloride channel F                           | -25.90340208 | 0.009080022 | 3.19106E-05 |
| N/A                                          | -25.90340208 | 0.009080022 | 3.19106E-05 |
| Ribosomal L32p protein family                | -52.50982104 | 1.46832E-06 | 4.86861E-10 |
| Ribosomal L32p protein family                | -28.125      | 6.85703E-07 | 2.03501E-10 |
| N/A                                          | -38.26815642 | 3.14448E-08 | 6.15261E-12 |
| peroxin 5                                    | -37.35930736 | 0.004282959 | 1.05407E-05 |
| Phosphoinositide phosphatase family protein  | -47.64079148 | 1.69031E-05 | 8.47917E-09 |
| N/A                                          | -30.01808318 | 0.00065089  | 2.28647E-06 |
| HAC13 protein (HAC13)                        | -80.13157895 | 4.46743E-05 | 7.05825E-08 |
| zinc induced facilitator-like 1              | -31.75501801 | 1.34583E-07 | 3.17232E-11 |
| zinc induced facilitator-like 1              | -27.21893491 | 0.000476624 | 4.40055E-07 |
| alpha/beta-Hydrolases superfamily protein    | -57.44047619 | 0.000510142 | 5.71431E-07 |
| nuclear matrix protein-related               | -56.71641791 | 0.000526401 | 4.97594E-07 |
| ribosomal protein large subunit 27           | -67.72727273 | 0.003020605 | 6.38621E-06 |
| nucleoporin-related                          | -41.66666667 | 0.005157159 | 1.38256E-05 |
| Family of unknown function (DUF566)          | -48.40654608 | 0.009401203 | 3.35673E-05 |
| Cytidine/deoxycytidylate deaminase family p  | -100         | 0.001240448 | 1.54644E-06 |
| cyclic nucleotide-gated channel 17           | -71.16382506 | 3.04088E-12 | 1.8063E-16  |
| transducin family protein / WD-40 repeat fan | -72.72727273 | 0.008355196 | 2.8191E-05  |
| exocyst subunit exo70 family protein E2      | -38.7477314  | 0.003825746 | 8.93749E-06 |
| DDT domain superfamily                       | -74.64788732 | 0.000377032 | 3.29579E-07 |
| Homeodomain-like superfamily protein         | -90          | 0.005869408 | 1.22371E-05 |
| ataxia-telangiectasia mutated                | -64.61038961 | 0.002251172 | 4.3116E-06  |
| ataxia-telangiectasia mutated                | -39.3258427  | 6.2256E-05  | 4.16123E-08 |
| Protein kinase superfamily protein           | -37.5        | 9.8502E-05  | 6.29894E-08 |
| alpha/beta-Hydrolases superfamily protein    | -100         | 0.000440203 | 4.00618E-07 |
| Pectin lyase-like superfamily protein        | -28.87657058 | 0.002669057 | 1.58145E-05 |
| glyceraldehyde-3-phosphate dehydrogenase     | -44.3175853  | 0.009942255 | 0.000104024 |
| nuclear protein X1                           | -43.33333333 | 0.000834933 | 9.34967E-07 |
| RNA-metabolising metallo-beta-lactamase fa   | -28.41234291 | 0.000269459 | 7.09819E-07 |
| Protein kinase superfamily protein           | -29.04233171 | 0.006237738 | 5.28551E-05 |
| topoisomerase 3alpha                         | -51.72413793 | 0.009314196 | 2.27045E-05 |
| Nucleotide-sugar transporter family protein  | -71.53310105 | 0.000957331 | 3.86079E-06 |
| plastid transcriptionally active7            | -30.40229885 | 0.007264795 | 6.59934E-05 |
| histone methyltransferases(H3-K4 specific);h | -53.74396135 | 0.002100986 | 3.15851E-06 |
| putative protein kinase 1                    | -45.05882353 | 0.000476686 | 4.40462E-07 |
| Transducin/WD40 repeat-like superfamily pro  | -74.28571429 | 0.0059944   | 1.259E-05   |
| sirohdrochlorin ferrochelatae B              | -58          | 0.00471802  | 9.00616E-06 |
| Tetratricopeptide repeat (TPR)-like superfam | -93.33333333 | 5.62741E-05 | 3.18177E-08 |
| Transcription factor TFIIIE, alpha subunit   | -95.65217391 | 3.22857E-05 | 1.55791E-08 |
| glycine-rich RNA-binding protein 3           | -100         | 2.76356E-05 | 1.28935E-08 |
| H(+)-ATPase 11                               | -68.18181818 | 2.69695E-08 | 4.11379E-12 |
| DDT domain superfamily                       | -42.80661867 | 2.41711E-09 | 2.78293E-13 |

|                                                  |              |             |             |
|--------------------------------------------------|--------------|-------------|-------------|
| ARM repeat superfamily protein                   | -30.99415205 | 0.004700162 | 1.20881E-05 |
| ARM repeat superfamily protein                   | -27.83018868 | 3.76748E-13 | 2.39947E-17 |
| ARM repeat superfamily protein                   | -43.47826087 | 0.001784439 | 2.47774E-06 |
| ARM repeat superfamily protein                   | -26.72998643 | 5.97584E-06 | 2.09037E-09 |
| RNA-dependent RNA polymerase 2                   | -91.30434783 | 0.000695012 | 7.13043E-07 |
| histone deacetylase 6                            | -100         | 3.22217E-05 | 1.55009E-08 |
| ubiquitin-associated (UBA)/TS-N domain-con       | -94.11764706 | 0.000303905 | 2.50501E-07 |
| 26S proteasome, regulatory subunit Rpn7;Pro      | -36.86046512 | 0.003350142 | 7.42567E-06 |
| 26S proteasome, regulatory subunit Rpn7;Pro      | -36.28909809 | 2.80E-06    | 2.30753E-09 |
| AAA-type ATPase family protein                   | -73.91304348 | 0.006065956 | 1.27714E-05 |
| MBOAT (membrane bound O-acyl transferase)        | -34          | 0.000697205 | 7.16826E-07 |
| glycine-rich protein                             | -40.54580897 | 1.42E-07    | 6.16521E-11 |
| O-fucosyltransferase family protein              | -44.29123001 | 0.008480288 | 2.88426E-05 |
| O-fucosyltransferase family protein              | -36.97351828 | 0.00460798  | 8.72514E-06 |
| plant glycogenin-like starch initiation protein  | -33.19284802 | 0.004921377 | 1.29673E-05 |
| hydroxyproline-rich glycoprotein family prote    | -31.41025641 | 0.004395021 | 8.19299E-06 |
| Histone H3 K4-specific methyltransferase SET     | -39.09905426 | 0.008616815 | 2.94858E-05 |
| Histone H3 K4-specific methyltransferase SET     | -28.38333107 | 0.007936784 | 1.82194E-05 |
| N/A                                              | -91.42857143 | 0.000132304 | 8.96499E-08 |
| Tetratricopeptide repeat (TPR)-like superfam     | -59.09090909 | 0.008206862 | 1.91627E-05 |
| AMP-dependent synthetase and ligase family       | -93.33333333 | 9.09588E-05 | 5.65648E-08 |
| AMP-dependent synthetase and ligase family       | -93.33333333 | 9.09588E-05 | 5.65648E-08 |
| Proteasome component (PCI) domain protei         | -30.47504026 | 0.003248343 | 7.10017E-06 |
| PIF1 helicase                                    | -70.625      | 0.001759016 | 3.05715E-06 |
| N/A                                              | -70.625      | 0.001759016 | 3.05715E-06 |
| histidine acid phosphatase family protein        | -26.5625     | 0.001078932 | 1.28337E-06 |
| histidine acid phosphatase family protein        | -100         | 0.001933999 | 2.83514E-06 |
| Transcription initiation factor IIF, beta subuni | -29.80769231 | 0.000466478 | 1.46927E-06 |
| N/A                                              | -27.65422859 | 1.19106E-05 | 4.71283E-09 |
| WD-40 repeat family protein                      | -31.43079662 | 0.00015733  | 1.2954E-07  |
| WD-40 repeat family protein                      | -27.53211629 | 0.000429667 | 4.64642E-07 |
| WD-40 repeat family protein                      | -37.54813864 | 0.004517985 | 1.14357E-05 |
| Tubulin/FtsZ family protein                      | -92.85714286 | 1.39579E-06 | 3.85892E-10 |
| Pentatricopeptide repeat (PPR) superfamily p     | -30.07493644 | 0.000112224 | 8.59907E-08 |
| Ribosomal L32p protein family                    | -94.44444444 | 0.000775974 | 8.38216E-07 |
| pumilio 7                                        | -68.75       | 8.12321E-06 | 2.9845E-09  |
| P-loop containing nucleoside triphosphate hy     | -91.66666667 | 0.004921546 | 9.61483E-06 |
| FAD-binding Berberine family protein             | -36.08654076 | 1.04335E-05 | 1.15617E-08 |
| N/A                                              | -38.95877009 | 0.000971663 | 1.35124E-06 |
| IAP-like protein 1                               | -47.91666667 | 0.008111141 | 1.88261E-05 |
| Tic22-like family protein                        | -42.5        | 0.000137899 | 9.49584E-08 |
| aspartate kinase-homoserine dehydrogenase        | -71.64179104 | 0.000117533 | 7.85204E-08 |
| Protein of unknown function, DUF538              | -37.96440489 | 1.24E-10    | 1.93564E-14 |
| NAD(P)-binding Rossmann-fold superfamily p       | -28.87307458 | 0.006790648 | 5.98308E-05 |

|                                                 |              |             |             |
|-------------------------------------------------|--------------|-------------|-------------|
| 5\'-3\' exonuclease family protein              | -100         | 0.001933999 | 2.83514E-06 |
| RNA-binding (RRM/RBD/RNP motifs) family p       | -57.8125     | 0.000244683 | 1.93432E-07 |
| N/A                                             | -28.93081761 | 0.00245867  | 3.87474E-06 |
| essential meiotic endonuclease 1B               | -44.18604651 | 0.008099053 | 1.87862E-05 |
| N/A                                             | -42.9280397  | 0.007012912 | 1.55256E-05 |
| signal recognition particle-related / SRP-relat | -46.08433735 | 0.000539075 | 5.1669E-07  |
| P-loop nucleoside triphosphate hydrolases su    | -100         | 3.88087E-07 | 9.04313E-11 |
| RNA helicase, ATP-dependent, SK12/DOB1 pr       | -78.125      | 0.006236312 | 1.3217E-05  |
| N/A                                             | -74.19354839 | 0.004402063 | 8.21257E-06 |
| RNA-binding CRS1 / YhbY (CRM) domain prot       | -29.36425339 | 2.45546E-15 | 9.83457E-20 |
| RNA-binding CRS1 / YhbY (CRM) domain prot       | -35.69601754 | 0.005428867 | 1.49176E-05 |
| RNA-binding CRS1 / YhbY (CRM) domain prot       | -42.23602484 | 6.51509E-18 | 1.8822E-22  |
| RNA-binding CRS1 / YhbY (CRM) domain prot       | -37.54696726 | 2.99552E-14 | 1.43578E-18 |
| RNA-binding CRS1 / YhbY (CRM) domain prot       | -38.21656051 | 9.62756E-14 | 5.1835E-18  |
| annexin 5                                       | -25.99302201 | 0.006942027 | 6.17816E-05 |
| ARM repeat superfamily protein                  | -100         | 0.000115391 | 7.66995E-08 |
| ARM repeat superfamily protein                  | -44          | 0.001134763 | 1.36392E-06 |
| N/A                                             | -75          | 0.002249117 | 3.46862E-06 |
| Calcium-binding EF hand family protein          | -75          | 0.002249117 | 3.46862E-06 |
| N/A                                             | -100         | 4.92908E-05 | 2.67079E-08 |
| BED zinc finger ;hAT family dimerisation dom    | -30.14853648 | 1.27E-08    | 3.72288E-12 |
| Chaperone DnaJ-domain superfamily protein       | -80          | 2.29E-07    | 1.09835E-10 |
| RNA-binding protein 1                           | -51.16648993 | 0.001284776 | 1.62243E-06 |
| P-type ATPase of Arabidopsis 2                  | -69.44136145 | 1.89E-16    | 4.79168E-21 |
| WRKY DNA-binding protein 40                     | -26.76767677 | 0.006032049 | 5.04028E-05 |
| Phox (PX) domain-containing protein             | -79.6347032  | 8.97856E-06 | 3.99696E-09 |
| RING/U-box superfamily protein                  | -37.58865248 | 0.000733326 | 2.67772E-06 |
| RNA-binding KH domain-containing protein        | -28.33333333 | 0.000548443 | 6.27749E-07 |
| RNA-binding KH domain-containing protein        | -25.19900498 | 0.009582246 | 3.47697E-05 |
| RNA-binding KH domain-containing protein        | -29.57746479 | 1.00554E-09 | 1.05419E-13 |
| RNA-binding KH domain-containing protein        | -36.95652174 | 0.000426023 | 3.82715E-07 |
| Golgi-body localisation protein domain ;RNA     | -100         | 0.000703795 | 7.39602E-07 |
| Tetratricopeptide repeat (TPR)-like superfam    | -66.07142857 | 0.004711596 | 8.9875E-06  |
| Vacuolar sorting protein 9 (VPS9) domain        | -25.83900227 | 8.24282E-07 | 2.48861E-10 |
| MAPK/ERK kinase kinase 1                        | -36.36363636 | 0.007503301 | 1.69586E-05 |
| YbaK/aminoacyl-tRNA synthetase-associated       | -70.96774194 | 0.008206862 | 1.91627E-05 |
| N/A                                             | -26.20844564 | 7.18262E-05 | 1.28436E-07 |
| IAA-leucine resistant (ILR)-like gene 6         | -50.25031289 | 0.000491077 | 5.47173E-07 |
| Chaperone DnaJ-domain superfamily protein       | -40.625      | 0.004018222 | 7.31839E-06 |
| global transcription factor group A2            | -78.94736842 | 3.3141E-05  | 1.6089E-08  |
| vacuolar protein sorting 45                     | -66.66666667 | 0.005925316 | 1.2389E-05  |
| FTSH protease 11                                | -35.77694236 | 4.71E-08    | 1.66274E-11 |
| plastid transcriptionally active7               | -81.81818182 | 0.004303843 | 7.96305E-06 |
| nascent polypeptide-associated complex sub      | -29.54545455 | 0.003609909 | 6.36145E-06 |

|                                                 |              |             |             |
|-------------------------------------------------|--------------|-------------|-------------|
| disproportionating enzyme                       | -51.94805195 | 0.009736237 | 2.40475E-05 |
| like COV 2                                      | -39.28571429 | 0.00700902  | 1.55022E-05 |
| Nucleotidyltransferase family protein           | -25.15873016 | 0.000368267 | 3.19217E-07 |
| ferrochelatase 2                                | -73.01587302 | 0.000175386 | 1.29518E-07 |
| transducin family protein / WD-40 repeat fan    | -100         | 0.000796198 | 8.74075E-07 |
| glucan synthase-like 8                          | -100         | 0.000243473 | 1.92297E-07 |
| glucan synthase-like 8                          | -54.08163265 | 6.45425E-05 | 4.38187E-08 |
| glucan synthase-like 8                          | -31.66666667 | 0.00598506  | 1.2566E-05  |
| N/A                                             | -31.66666667 | 0.00598506  | 1.2566E-05  |
| D111/G-patch domain-containing protein          | -40.87504071 | 2.94E-06    | 2.44673E-09 |
| GATA type zinc finger transcription factor fan  | -58.90410959 | 0.000675074 | 8.28395E-07 |
| Protein of unknown function (DUF962)            | -43.24324324 | 0.000311801 | 3.0849E-07  |
| Protein of unknown function (DUF962)            | -40          | 3.94077E-06 | 1.29273E-09 |
| Protein of unknown function (DUF962)            | -34.87394958 | 1.81671E-22 | 1.86517E-27 |
| Protein of unknown function (DUF962)            | -27.84810127 | 5.06925E-19 | 1.36465E-23 |
| Leucine-rich repeat protein kinase family pro   | -25.44489093 | 0.000741281 | 9.36585E-07 |
| SNF2 domain-containing protein / helicase dc    | -67.5        | 0.005918528 | 1.23612E-05 |
| N/A                                             | -100         | 7.87674E-06 | 2.87084E-09 |
| U5 small nuclear ribonucleoprotein helicase     | -33.76344086 | 0.004529719 | 1.14743E-05 |
| P-loop containing nucleoside triphosphate hy    | -44.68085106 | 0.000962609 | 1.33297E-06 |
| ATPase E1-E2 type family protein / haloacid c   | -25.58139535 | 0.001727111 | 2.37354E-06 |
| homeodomain GLABROUS 2                          | -91.30434783 | 0.000695012 | 7.13043E-07 |
| PIF1 helicase                                   | -32.1291866  | 0.002717151 | 1.62016E-05 |
| prenylated RAB acceptor 1.B4                    | -57.8125     | 1.24196E-07 | 2.42267E-11 |
| Transducin/WD40 repeat-like superfamily prc     | -57.8125     | 1.24196E-07 | 2.42267E-11 |
| Stabilizer of iron transporter SufD / Polynucle | -74.11764706 | 0.002217143 | 3.40305E-06 |
| Protein of unknown function (DUF803)            | -28.29226848 | 0.002182126 | 4.12778E-06 |
| Protein of unknown function (DUF803)            | -31.12582781 | 4.65625E-06 | 1.84352E-09 |
| Protein of unknown function (DUF803)            | -48.10400867 | 2.05546E-07 | 4.34117E-11 |
| Nucleotide/sugar transporter family protein     | -52.94117647 | 0.001082744 | 1.59388E-06 |
| Nucleotide/sugar transporter family protein     | -47.31182796 | 3.20327E-06 | 1.19043E-09 |
| Nucleotide/sugar transporter family protein     | -45.45454545 | 0.003351354 | 5.77466E-06 |
| signal recognition particle receptor alpha sub  | -72.30769231 | 0.000926295 | 1.06037E-06 |
| SET domain group 4                              | -38.38709677 | 0.000688034 | 2.45538E-06 |
| cyclic nucleotide-gated channel 17              | -100         | 0.001240448 | 1.54644E-06 |
| DNAJ heat shock family protein                  | -36.80981595 | 2.99385E-06 | 1.09688E-09 |
| DNAJ heat shock family protein                  | -26.41134557 | 4.65395E-05 | 2.89072E-08 |
| DNAJ heat shock family protein                  | -39.13043478 | 0.000150272 | 1.06233E-07 |
| N/A                                             | -48.53603604 | 0.00482238  | 9.30793E-06 |
| Ankyrin repeat family protein                   | -70.58823529 | 2.48778E-09 | 2.90078E-13 |
| cytochrome P450, family 72, subfamily A, pol    | -66.66666667 | 0.00022401  | 1.72805E-07 |
| phytosylfokine-alpha receptor 2                 | -66.66666667 | 0.00022401  | 1.72805E-07 |
| 3-hydroxyacyl-CoA dehydrogenase family prc      | -41.69398907 | 0.000591822 | 6.97507E-07 |
| ribosomal protein L6 family protein             | -45          | 0.007094679 | 1.57726E-05 |

|                                                 |              |             |             |
|-------------------------------------------------|--------------|-------------|-------------|
| cytochrome c oxidase 17                         | -100         | 5.09444E-06 | 1.74469E-09 |
| pleiotropic drug resistance 12                  | -31.68119099 | 0.005614165 | 1.57091E-05 |
| Galactose oxidase/kelch repeat superfamily p    | -31.1789905  | 0.002371301 | 4.6196E-06  |
| Transducin/WD40 repeat-like superfamily pr      | -43.56435644 | 0.004404594 | 3.20748E-05 |
| Transducin/WD40 repeat-like superfamily pr      | -96.15384615 | 1.20754E-05 | 4.80152E-09 |
| ARF-GAP domain 5                                | -95.12195122 | 4.96095E-08 | 8.36756E-12 |
| Disease resistance protein (TIR-NBS-LRR class   | -38.31831832 | 0.005210367 | 1.04045E-05 |
| Disease resistance protein (TIR-NBS-LRR class   | -30.53626543 | 0.000623005 | 6.17971E-07 |
| Disease resistance protein (TIR-NBS-LRR class   | -50.94339623 | 0.000140179 | 9.70425E-08 |
| Disease resistance protein (TIR-NBS-LRR class   | -38.7804878  | 4.02392E-05 | 2.04203E-08 |
| Disease resistance protein (TIR-NBS-LRR class   | -34.32835821 | 3.18948E-06 | 1.01044E-09 |
| disease resistance protein (TIR-NBS-LRR class   | -51.26705653 | 0.000192914 | 1.67958E-07 |
| BED zinc finger ;hAT family dimerisation dom    | -64.46808511 | 4.18656E-05 | 2.15219E-08 |
| disease resistance protein (TIR-NBS-LRR class   | -41.66666667 | 0.000914884 | 1.04411E-06 |
| Tetratricopeptide repeat (TPR)-like superfam    | -74.41860465 | 0.000592594 | 5.79286E-07 |
| ortholog of human splicing factor SC35          | -74.41860465 | 0.000592594 | 5.79286E-07 |
| Translation initiation factor SU11 family prote | -33.79228954 | 0.000127505 | 8.6118E-08  |
| N/A                                             | -39.09294155 | 0.009285204 | 3.29824E-05 |
| trehalose-phosphatase/synthase 7                | -70.90909091 | 0.003036641 | 5.07286E-06 |
| multi-protein bridging factor 1B                | -29.72659486 | 0.004466416 | 3.27223E-05 |
| protein kinase C substrate, heavy chain-relate  | -25.64102564 | 0.000615827 | 2.12404E-06 |
| O-methyltransferase family protein              | -29.0805417  | 0.002067843 | 1.10711E-05 |
| N/A                                             | -44.44444444 | 0.004415854 | 1.10641E-05 |
| Peptidase family M48 family protein             | -90.90909091 | 0.004921546 | 9.61483E-06 |
| Auxin-responsive GH3 family protein             | -48.47094801 | 2.71881E-07 | 6.9442E-11  |
| Core-2/I-branching beta-1,6-N-acetylglucosar    | -33.02139037 | 0.00674261  | 1.47225E-05 |
| N/A                                             | -25.98357596 | 0.000576013 | 1.94708E-06 |
| N/A                                             | -100         | 6.22335E-07 | 1.52888E-10 |
| TBP-associated factor 7                         | -73.51916376 | 0.000788288 | 1.02015E-06 |
| nuclear factor Y, subunit C11                   | -54.05405405 | 8.74678E-05 | 5.4009E-08  |
| N/A                                             | -31.06796117 | 2.07E-30    | 3.15677E-36 |
| NB-ARC domain-containing disease resistanc      | -42.85714286 | 0.00731223  | 1.64102E-05 |
| exocyst complex component 84B                   | -50          | 0.000987439 | 1.14557E-06 |
| Phox-associated domain;Phox-like;Sorting ne     | -56.21840243 | 0.000805269 | 8.87576E-07 |
| translocon at the inner envelope membrane       | -84.84848485 | 0.001249711 | 1.56624E-06 |
| N/A                                             | -57.47303544 | 9.89729E-06 | 3.76695E-09 |
| Metallo-hydrolase/oxidoreductase superfami      | -100         | 0.000796198 | 8.74075E-07 |
| cation exchanger 5                              | -100         | 6.03462E-06 | 2.11536E-09 |
| CemA-like proton extrusion protein-related      | -28.38350377 | 0.002603975 | 5.21642E-06 |
| CemA-like proton extrusion protein-related      | -28.408713   | 0.00161963  | 2.19019E-06 |
| Signal recognition particle, SRP54 subunit pr   | -43.14345992 | 2.04894E-05 | 8.98538E-09 |
| Ubiquitin system component Cue protein          | -52.27272727 | 0.001906341 | 2.69927E-06 |
| CASC3/Barentsz eIF4AIII binding                 | -43.75       | 0.002044314 | 3.04933E-06 |
| aminopeptidase M1                               | -25.98484848 | 0.006262565 | 5.31393E-05 |

|                                              |              |             |             |
|----------------------------------------------|--------------|-------------|-------------|
| CCAAT-binding factor                         | -68          | 0.001192665 | 1.44926E-06 |
| pectin methylesterase 3                      | -54.58669355 | 0.000115391 | 7.61307E-08 |
| N/A                                          | -64.17910448 | 4.30129E-05 | 2.22064E-08 |
| CBL-interacting protein kinase 9             | -38.42105263 | 0.007394621 | 6.77961E-05 |
| cytochrome P450, family 86, subfamily A, pol | -62.5        | 8.96604E-08 | 1.99569E-11 |
| cytochrome P450, family 86, subfamily A, pol | -67.5        | 6.4898E-07  | 1.60862E-10 |
| Major facilitator superfamily protein        | -55.51948052 | 0.000203014 | 1.53643E-07 |
| RNAhelicase-like 8                           | -71.96969697 | 0.001680862 | 2.29642E-06 |
| S-adenosyl-L-methionine-dependent methylt    | -36.86868687 | 9.55052E-05 | 1.83175E-07 |
| response regulator 2                         | -26.20155039 | 0.005708866 | 1.60698E-05 |
| N/A                                          | -26.20155039 | 0.005708866 | 1.60698E-05 |
| N/A                                          | -26.20155039 | 0.005708866 | 1.60698E-05 |
| N/A                                          | -26.20155039 | 0.005708866 | 1.60698E-05 |
| Late embryogenesis abundant (LEA) hydroxyt   | -27.47252747 | 3.26604E-05 | 4.78029E-08 |
| MUTS homolog 7                               | -82.60869565 | 0.00161376  | 2.18107E-06 |
| Plant protein of unknown function (DUF639)   | -86.66666667 | 3.06456E-06 | 9.52884E-10 |
| ATP-binding cassette A2                      | -38.89659958 | 8.95852E-12 | 5.84698E-16 |
| BED zinc finger ;hAT family dimerisation dom | -38.56008055 | 3.75717E-09 | 5.89593E-13 |
| Surfeit locus 1 cytochrome c oxidase biogene | -92.30769231 | 3.22857E-05 | 1.55791E-08 |
| basic pentacysteine1                         | -92.30769231 | 1.89953E-08 | 2.73029E-12 |
| Auxin efflux carrier family protein          | -74.28571429 | 0.001547796 | 2.57826E-06 |
| Fatty acid hydroxylase superfamily           | -31.18762475 | 0.003062898 | 1.92727E-05 |
| endoplasmic reticulum oxidoreductins 2       | -30          | 0.007452525 | 6.85503E-05 |
| Vacuolar sorting protein 39                  | -34.13105413 | 0.007936784 | 1.82336E-05 |
| hexokinase 1                                 | -28.7012987  | 0.009138996 | 3.22077E-05 |
| hexokinase 1                                 | -25.43847385 | 2.69E-12    | 2.25081E-16 |
| nuclear RNA polymerase C2                    | -34.12277378 | 0.001057295 | 1.53075E-06 |
| nuclear RNA polymerase C2                    | -27.14449601 | 1.17287E-08 | 2.06384E-12 |
| N/A                                          | -77.50206782 | 1.55393E-07 | 3.09961E-11 |
| Alkaline-phosphatase-like family protein     | -37.84652471 | 0.002136184 | 1.15577E-05 |
| NAD(P)-binding Rossmann-fold superfamily p   | -26.92307692 | 0.000639927 | 2.23658E-06 |
| N/A                                          | -95.45454545 | 1.90388E-10 | 1.63354E-14 |
| LMBR1-like membrane protein                  | -28.92466935 | 0.001049893 | 1.51152E-06 |
| N/A                                          | -100         | 0.001240448 | 1.54644E-06 |
| N/A                                          | -67.64705882 | 6.46153E-07 | 1.59688E-10 |
| Tautomerase/MIF superfamily protein          | -55.85516179 | 2.36822E-05 | 1.06461E-08 |
| SU(VAR)3-9 homolog 9                         | -33.66503368 | 0.000121424 | 2.49685E-07 |
| N/A                                          | -35.62172594 | 1.03E-08    | 2.91112E-12 |
| ARM repeat superfamily protein               | -67.34693878 | 0.000391002 | 3.46092E-07 |
| RING-finger protein for embryogenesis        | -29.58579882 | 0.002324156 | 3.6048E-06  |
| DYNAMIN-like 1C                              | -67.21311475 | 6.07421E-06 | 2.13814E-09 |
| Pentatricopeptide repeat (PPR-like) superfam | -65          | 3.05499E-07 | 6.74344E-11 |
| Glutamyl-tRNA reductase family protein       | -70.96774194 | 0.003804626 | 6.81339E-06 |
| Transducin/WD40 repeat-like superfamily pro  | -40          | 0.001455577 | 2.36062E-06 |

|                                                          |              |             |             |
|----------------------------------------------------------|--------------|-------------|-------------|
| Protein of unknown function (DUF616)                     | -100         | 0.001240448 | 1.54644E-06 |
| IQ-domain 9                                              | -70.45454545 | 0.008742198 | 2.08614E-05 |
| N/A                                                      | -39.34108527 | 0.005575491 | 1.14403E-05 |
| Thioesterase/thiol ester dehydrase-isomerase             | -97.2972973  | 1.8665E-06  | 5.31086E-10 |
| 2-oxoglutarate (2OG) and Fe(II)-dependent oxidoreductase | -47.72727273 | 4.57997E-05 | 7.27792E-08 |
| cytochrome P450, family 707, subfamily A, protein        | -26.60347985 | 3.14E-09    | 7.42633E-13 |
| Pentatricopeptide repeat (PPR) superfamily protein       | -100         | 0.001240448 | 1.54644E-06 |
| calmodulin-binding protein                               | -70          | 0.000151513 | 1.07333E-07 |
| N/A                                                      | -60.17316017 | 0.00283208  | 4.63767E-06 |
| RING/U-box superfamily protein                           | -50.67330211 | 6.59978E-07 | 1.65855E-10 |
| N/A                                                      | -65.71428571 | 3.10585E-08 | 4.91972E-12 |
| Glycosyl hydrolase superfamily protein                   | -41.66666667 | 0.00107249  | 1.27413E-06 |
| N/A                                                      | -27.46443409 | 1.73E-07    | 7.86291E-11 |
| tobamovirus multiplication 1                             | -100         | 0.001933999 | 2.83514E-06 |
| ZCW7                                                     | -31.72774869 | 0.001509362 | 2.48748E-06 |
| ZCW7                                                     | -38.88719357 | 1.41915E-08 | 1.96696E-12 |
| Sec14p-like phosphatidylinositol transfer family protein | -30.45751634 | 7.88398E-05 | 1.44188E-07 |
| phosphate transporter 4;6                                | -44.93251243 | 2.16E-06    | 1.65923E-09 |
| Smg-4/UPF3 family protein                                | -44.93251243 | 2.16E-06    | 1.65923E-09 |
| DDT domain-containing protein                            | -30.83333333 | 0.007476304 | 1.68647E-05 |
| Myosin heavy chain-related protein                       | -62.15447154 | 2.22958E-06 | 6.52382E-10 |
| serine racemase                                          | -100         | 0.001240448 | 1.54644E-06 |
| RNA helicase, ATP-dependent, SK12/DOB1 protein           | -46.53465347 | 0.005746026 | 1.1904E-05  |
| phosphorylethanolamine cytidyltransferase                | -93.02325581 | 1.19359E-09 | 1.31296E-13 |
| isoamylase 1                                             | -72.22222222 | 0.004412727 | 8.23942E-06 |
| BURP domain-containing protein                           | -27.13235294 | 1.61E-18    | 2.54054E-23 |
| Fibronectin type III domain-containing protein           | -27.45257453 | 4.93719E-05 | 8.04315E-08 |
| CRS1 / YhbY (CRM) domain-containing protein              | -83.33333333 | 3.10665E-12 | 1.86815E-16 |
| CRS1 / YhbY (CRM) domain-containing protein              | -36.99065792 | 0.000830814 | 9.28203E-07 |
| associated molecule with the SH3 domain of               | -100         | 3.22217E-05 | 1.55009E-08 |
| Pyridoxal phosphate (PLP)-dependent transferase          | -34.28571429 | 0.002980767 | 4.9511E-06  |
| AGAMOUS-like 44                                          | -100         | 9.291E-06   | 3.49531E-09 |
| Protein phosphatase 2C family protein                    | -100         | 0.001933999 | 2.83514E-06 |
| arginine/serine-rich zinc knuckle-containing protein     | -55.453149   | 0.009092671 | 2.19311E-05 |
| RNA-binding (RRM/RBD/RNP motifs) family protein          | -49.29577465 | 0.001190556 | 1.44408E-06 |
| O-acetyltransferase family protein                       | -35.13513514 | 0.004312652 | 7.98567E-06 |
| RECQ helicase I1                                         | -47.54098361 | 0.000559946 | 5.41212E-07 |
| ZIP metal ion transporter family                         | -100         | 0.000534009 | 5.09877E-07 |
| ornithine-delta-aminotransferase                         | -96.96969697 | 2.02603E-10 | 1.76807E-14 |
| Leucine-rich repeat protein kinase family protein        | -80          | 0.000299187 | 2.44418E-07 |
| G10 family protein                                       | -85.71428571 | 0.003440723 | 5.98256E-06 |
| protein binding                                          | -40          | 0.001228867 | 1.50587E-06 |
| general regulatory factor 9                              | -30.93407873 | 0.001406831 | 6.53368E-06 |
| LETM1-like protein                                       | -90          | 0.00295471  | 4.89482E-06 |

|                                               |              |             |             |
|-----------------------------------------------|--------------|-------------|-------------|
| UDP-glucose:glycoprotein glucosyltransferase  | -27.41779497 | 0.002902342 | 6.0514E-06  |
| binding                                       | -41.3372093  | 0.008379863 | 2.83084E-05 |
| bZIP transcription factor family protein      | -34.48275862 | 0.004920032 | 1.29573E-05 |
| cytochrome P450, family 71, subfamily B, pol  | -26.19937695 | 7.75246E-05 | 1.415E-07   |
| N/A                                           | -100         | 0.001933999 | 2.83514E-06 |
| Rad21/Rec8-like family protein                | -71.76470588 | 0.000308141 | 2.54457E-07 |
| Ribosomal protein S5/Elongation factor G/III/ | -100         | 0.001933999 | 2.83514E-06 |
| Trypsin family protein                        | -65.67164179 | 4.4312E-06  | 1.47206E-09 |
| N/A                                           | -53.57142857 | 0.000150272 | 1.0607E-07  |
| Metallo-hydrolase/oxidoreductase superfami    | -100         | 0.001933999 | 2.83514E-06 |
| multidrug resistance-associated protein 6     | -76.81818182 | 0.007707273 | 2.50495E-05 |
| Leucine-rich repeat transmembrane protein l   | -39.86842105 | 0.0033077   | 2.14733E-05 |
| LETM1-like protein                            | -100         | 0.000534009 | 5.09877E-07 |
| mRNA capping enzyme family protein            | -100         | 3.09357E-06 | 9.64173E-10 |
| alpha/beta-Hydrolases superfamily protein     | -59.83333333 | 9.62541E-05 | 7.14785E-08 |
| Low PSII Accumulation 3                       | -25.73336826 | 0.000991912 | 4.04559E-06 |
| cyclin-dependent kinase B1;2                  | -27.20238095 | 0.001156348 | 4.97278E-06 |
| O-fucosyltransferase family protein           | -28.57142857 | 0.000115304 | 7.59321E-08 |
| EAP30/Vps36 family protein                    | -52.44122966 | 0.000165817 | 1.20749E-07 |
| Pentatricopeptide repeat (PPR) superfamily p  | -36.92307692 | 5.94833E-05 | 3.93294E-08 |
| Pentatricopeptide repeat (PPR) superfamily p  | -46.15384615 | 0.000652308 | 6.59186E-07 |
| Pentatricopeptide repeat (PPR) superfamily p  | -31.76470588 | 1.38669E-06 | 3.81343E-10 |
| Pentatricopeptide repeat (PPR) superfamily p  | -28.08988764 | 3.57038E-05 | 1.76474E-08 |
| Pentatricopeptide repeat (PPR) superfamily p  | -38.88888889 | 9.90426E-06 | 4.49561E-09 |
| Pentatricopeptide repeat (PPR) superfamily p  | -48.88888889 | 4.07776E-18 | 8.37309E-23 |
| Pentatricopeptide repeat (PPR) superfamily p  | -58.71559633 | 5.2241E-15  | 1.57073E-19 |
| Pentatricopeptide repeat (PPR) superfamily p  | -41.22807018 | 8.19788E-11 | 8.39691E-15 |
| GTP-binding protein-related                   | -72.36842105 | 0.004811332 | 1.25257E-05 |
| Topoisomerase II-associated protein PAT1      | -41.94444444 | 0.000314104 | 3.11625E-07 |
| Topoisomerase II-associated protein PAT1      | -54.28571429 | 1.09852E-07 | 2.51726E-11 |
| Topoisomerase II-associated protein PAT1      | -44.0885265  | 2.39163E-10 | 2.79516E-14 |
| Topoisomerase II-associated protein PAT1      | -44.44444444 | 0.000396144 | 3.51516E-07 |
| FTSH protease 12                              | -40.74074074 | 0.006687884 | 1.45664E-05 |
| P-loop containing nucleoside triphosphate hy  | -55.81395349 | 1.58957E-05 | 6.57453E-09 |
| P-loop containing nucleoside triphosphate hy  | -34.48275862 | 0.003058728 | 5.12097E-06 |
| SPIa/Ryanodine receptor (SPRY) domain-cont    | -38.13559322 | 0.002997114 | 6.31521E-06 |
| Phosphoinositide phosphatase family protein   | -100         | 1.92012E-05 | 8.35004E-09 |
| N/A                                           | -35.3125     | 0.003405725 | 2.24019E-05 |
| SNF1 kinase homolog 10                        | -27.8592545  | 3.52E-11    | 4.80513E-15 |
| Tetratricopeptide repeat (TPR)-like superfam  | -30          | 0.004183431 | 7.69118E-06 |
| PIF1 helicase                                 | -30.14824798 | 0.008425597 | 8.1874E-05  |
| calmodulin-binding protein-related            | -27.53623188 | 6.41886E-05 | 3.77518E-08 |
| Malectin/receptor-like protein kinase family  | -27.27272727 | 3.04347E-08 | 4.79859E-12 |
| DNA/RNA polymerases superfamily protein       | -26.84620344 | 0.002697389 | 5.46377E-06 |



|                                                     |              |             |             |
|-----------------------------------------------------|--------------|-------------|-------------|
| Protein phosphatase 2C family protein               | -63.88888889 | 0.008180794 | 1.90718E-05 |
| NB-ARC domain-containing disease resistance protein | -63.88888889 | 0.008180794 | 1.90718E-05 |
| phototropin 2                                       | -28.90271493 | 0.000711638 | 2.56817E-06 |
| phototropin 2                                       | -73.70689655 | 0.001134112 | 1.69533E-06 |
| RNA recognition motif (RRM)-containing protein      | -39.73888209 | 6.70594E-06 | 2.86198E-09 |
| Nucleic acid-binding, OB-fold-like protein          | -27.89983538 | 0.004059176 | 2.86338E-05 |
| ARF-GAP domain 8                                    | -37.81773782 | 3.50E-16    | 9.76647E-21 |
| N/A                                                 | -49.82275218 | 2.87662E-08 | 5.55295E-12 |
| N/A                                                 | -42.55319149 | 0.000916451 | 1.24378E-06 |
| Concanavalin A-like lectin protein kinase family    | -44.44444444 | 0.000222668 | 2.01904E-07 |
| Concanavalin A-like lectin protein kinase family    | -43.5483871  | 1.21274E-07 | 2.3301E-11  |
| Concanavalin A-like lectin protein kinase family    | -43.75       | 9.71966E-12 | 6.5576E-16  |
| Concanavalin A-like lectin protein kinase family    | -32.43243243 | 0.008862698 | 3.07483E-05 |
| Concanavalin A-like lectin protein kinase family    | -43.90243902 | 0.000908461 | 1.03396E-06 |
| N/A                                                 | -33.95061728 | 3.28415E-14 | 1.59569E-18 |
| N/A                                                 | -28.07268008 | 0.000435184 | 3.9254E-07  |
| N/A                                                 | -25.79206701 | 7.3107E-12  | 4.66427E-16 |
| Xanthine/uracil permease family protein             | -25.41193182 | 0.007072412 | 2.20853E-05 |
| Kinase interacting (KIP1-like) family protein       | -26.08695652 | 0.006485021 | 1.39533E-05 |
| kinesin like protein for actin based chloroplast    | -26.28332232 | 0.000917646 | 1.24965E-06 |
| kinesin like protein for actin based chloroplast    | -32.79722485 | 7.40E-06    | 7.67216E-09 |
| cyclin-related METHYLATED_REGION_CpG_H1             | -28.94736842 | 0.001319136 | 1.68033E-06 |
| Protein of Unknown Function (DUF239)                | -38.83495146 | 3.22969E-05 | 1.56082E-08 |
| spermidine synthase 1                               | -47.53623188 | 0.000354228 | 3.63526E-07 |
| pentatricopeptide (PPR) repeat-containing protein   | -57.26273726 | 4.1663E-08  | 8.39813E-12 |
| open reading frame 204                              | -31.59003831 | 4.10791E-05 | 2.0967E-08  |
| beta-1,2-xylosyltransferase                         | -66.64098613 | 9.73237E-05 | 6.21645E-08 |
| Haloacid dehalogenase-like hydrolase (HAD) family   | -28.49878935 | 0.003753498 | 2.56922E-05 |
| N/A                                                 | -28.20048309 | 0.000167035 | 1.40492E-07 |
| dolichol-phosphate mannosyltransferase-related      | -38.59649123 | 5.06E-13    | 3.64692E-17 |
| RINT-1 / TIP-1 family                               | -35.11689417 | 2.87E-16    | 7.639E-21   |
| RINT-1 / TIP-1 family                               | -64.23537703 | 5.03038E-08 | 1.02059E-11 |
| ENTH/VHS family protein                             | -41.66666667 | 0.007936784 | 1.8241E-05  |
| Signal transduction histidine kinase, hybrid-type   | -84.12698413 | 6.59978E-07 | 1.65394E-10 |
| indigoidine synthase A family protein               | -100         | 0.000796198 | 8.74075E-07 |
| pentatricopeptide (PPR) repeat-containing protein   | -100         | 0.000703795 | 7.39602E-07 |
| Sec14p-like phosphatidylinositol transfer family    | -93.33333333 | 0.000709141 | 7.4782E-07  |
| Transducin/WD40 repeat-like superfamily protein     | -80          | 0.001217272 | 1.48709E-06 |
| galacturonosyltransferase 4                         | -73.33333333 | 0.001564441 | 2.09491E-06 |
| Homeobox-leucine zipper family protein / lipase     | -70.73170732 | 0.009227131 | 2.2384E-05  |
| Calcium-dependent ARF-type GTPase activating        | -47.72727273 | 0.000756041 | 8.08922E-07 |
| KRR1 family protein                                 | -41.93548387 | 0.005815286 | 1.20901E-05 |
| dicer-like 2                                        | -100         | 0.005353107 | 1.08251E-05 |
| FAD-binding Berberine family protein                | -30.27108434 | 0.000939266 | 1.07798E-06 |

|                                                 |              |             |             |
|-------------------------------------------------|--------------|-------------|-------------|
| NAD(P)-binding Rossmann-fold superfamily p      | -41.26984127 | 0.005508077 | 1.12793E-05 |
| NAD(P)-binding Rossmann-fold superfamily p      | -96.66666667 | 2.7736E-05  | 1.29769E-08 |
| LYR family of Fe/S cluster biogenesis protein   | -35.44180885 | 6.62E-06    | 6.6555E-09  |
| N/A                                             | -29.54545455 | 0.000135885 | 1.07313E-07 |
| N/A                                             | -30.43478261 | 1.87179E-07 | 3.82972E-11 |
| cytochrome P450, family 81, subfamily D, pol    | -36.56923405 | 0.002004305 | 1.0595E-05  |
| lectin protein kinase family protein            | -28.65693584 | 2.18E-06    | 1.67517E-09 |
| Galactose oxidase/kelch repeat superfamily p    | -84.3373494  | 2.15153E-05 | 9.51416E-09 |
| villin 4                                        | -36.42512077 | 0.004992772 | 1.32308E-05 |
| pumilio 5                                       | -100         | 1.34565E-05 | 5.44723E-09 |
| membrane bound O-acyl transferase (MBOA         | -27.91871766 | 0.000160042 | 1.32193E-07 |
| membrane bound O-acyl transferase (MBOA         | -31.22129989 | 1.6685E-05  | 8.32594E-09 |
| alfin-like 5                                    | -59.15254237 | 0.000126172 | 2.6342E-07  |
| DEAD/DEAH box RNA helicase family protein       | -94.73684211 | 1.97241E-05 | 8.62084E-09 |
| protein kinase family protein / C-type lectin c | -46.76958262 | 0.003167086 | 5.37397E-06 |
| N/A                                             | -33.28379224 | 1.59E-07    | 7.07609E-11 |
| N/A                                             | -60.48076923 | 0.003538729 | 6.19514E-06 |
| VPS54                                           | -31.74369542 | 0.001876515 | 3.34761E-06 |
| Outer arm dynein light chain 1 protein          | -45.35857299 | 0.003115914 | 6.70221E-06 |
| rRNA processing protein-related                 | -32.2290032  | 2.47103E-05 | 1.12532E-08 |
| Cyclophilin-like peptidyl-prolyl cis-trans isom | -26.93346842 | 0.000586742 | 6.88438E-07 |
| Aha1 domain-containing protein                  | -25.95238095 | 1.88453E-05 | 2.38788E-08 |
| PYRIMIDINE B                                    | -46.04166667 | 0.003441086 | 7.73159E-06 |
| P-loop containing nucleoside triphosphate hy    | -46.04166667 | 0.003441086 | 7.73159E-06 |
| fatty acid desaturase 2                         | -36.70833333 | 0.000156609 | 3.48281E-07 |
| N/A                                             | -70          | 6.98183E-05 | 1.23782E-07 |
| Chaperone DnaJ-domain superfamily protein       | -93.33333333 | 0.001063149 | 1.55316E-06 |
| DNA GYRASE A                                    | -78.94736842 | 0.003758864 | 6.69009E-06 |
| Protein kinase superfamily protein              | -36.15384615 | 0.00572838  | 1.61806E-05 |
| Caleosin-related family protein                 | -43.47670251 | 0.003425268 | 7.66658E-06 |
| N/A                                             | -25.92342342 | 0.000679328 | 2.41983E-06 |
| plastidic pyruvate kinase beta subunit 1        | -25.36873156 | 0.001271237 | 5.64769E-06 |
| DNA primases                                    | -50.78039927 | 0.00034223  | 3.48291E-07 |
| Heavy metal transport/detoxification superfa    | -39.61916462 | 6.46745E-07 | 1.89817E-10 |
| 2-oxoglutarate (2OG) and Fe(II)-dependent o     | -76.19047619 | 0.000297757 | 2.9091E-07  |
| zinc finger WD40 repeat protein 1               | -92.30769231 | 8.08049E-08 | 1.45773E-11 |
| GroES-like zinc-binding alcohol dehydrogenas    | -27.08616011 | 1.52214E-05 | 7.45699E-09 |
| hydroxymethylglutaryl-CoA synthase / HMG-       | -68.18181818 | 0.002502691 | 3.95513E-06 |
| Microtubule associated protein (MAP65/ASE)      | -33.02459763 | 1.22E-07    | 5.12659E-11 |
| Tetratricopeptide repeat (TPR)-like superfam    | -46.8627451  | 8.92759E-05 | 1.68344E-07 |
| Dihydroxyacetone kinase                         | -69.23076923 | 0.00803061  | 1.85391E-05 |
| embryo sac development arrest 7                 | -36.66666667 | 0.00490816  | 9.53829E-06 |
| photosystem II reaction center protein M        | -29.22033898 | 0.00097996  | 1.13546E-06 |
| Reticulon family protein                        | -41.03899573 | 8.76E-08    | 3.43843E-11 |

|                                               |              |             |             |
|-----------------------------------------------|--------------|-------------|-------------|
| associated molecule with the SH3 domain of    | -37.47987118 | 0.000775922 | 2.89513E-06 |
| Fibronectin type III domain-containing protei | -85.71428571 | 0.008526819 | 2.01911E-05 |
| N/A                                           | -73.9088729  | 3.36592E-05 | 1.6464E-08  |
| Tesmin/TSO1-like CXC domain-containing prc    | -100         | 0.001933999 | 2.83514E-06 |
| S-adenosyl-L-methionine-dependent methylt     | -26.86433528 | 4.16E-07    | 2.22759E-10 |
| sugar transporter 14                          | -37.35909823 | 0.000920785 | 1.25675E-06 |
| MSCS-like 2                                   | -40          | 0.006316256 | 1.34698E-05 |
| Glycosyl hydrolase family protein             | -31.47239086 | 2.69086E-06 | 9.64667E-10 |
| Glycosyl hydrolase family protein             | -38.83784606 | 1.00554E-09 | 1.05448E-13 |
| SAUR-like auxin-responsive protein family     | -76.47058824 | 0.000366033 | 3.16743E-07 |
| SAUR-like auxin-responsive protein family     | -76.47058824 | 0.000366033 | 3.16743E-07 |
| Uncharacterized protein                       | -44.11206078 | 0.008460663 | 1.99228E-05 |
| N/A                                           | -43.40909091 | 0.001098386 | 1.31376E-06 |
| DNA binding;ATP binding;nucleic acid binding  | -55.55555556 | 0.006463162 | 1.38826E-05 |
| Pentatricopeptide repeat (PPR-like) superfam  | -76.69902913 | 3.01362E-08 | 4.66499E-12 |
| DNA-directed RNA polymerases                  | -69.6969697  | 3.38468E-07 | 7.69459E-11 |
| zinc finger protein 1                         | -60          | 0.005907747 | 1.2333E-05  |
| SKP1-like 21                                  | -70.90909091 | 0.001604185 | 2.16343E-06 |
| Protein of unknown function (DUF3741)         | -81.25       | 0.000115162 | 7.57544E-08 |
| Protein of unknown function (DUF3245)         | -25.5036208  | 0.000594029 | 2.02488E-06 |
| RNA-binding KH domain-containing protein      | -100         | 0.001933999 | 2.83514E-06 |
| SCAR homolog 2                                | -52.27272727 | 0.001906341 | 2.69927E-06 |
| N/A                                           | -26.6226138  | 0.003821711 | 2.63512E-05 |
| Target SNARE coiled-coil domain protein       | -33.95566922 | 0.001277483 | 1.98623E-06 |
| Polyketide cyclase/dehydrase and lipid transp | -37.83783784 | 0.002053449 | 3.06747E-06 |
| Zinc finger C-x8-C-x5-C-x3-H type family prot | -90.90909091 | 0.004921546 | 9.61483E-06 |
| transducin family protein / WD-40 repeat fan  | -83.33333333 | 0.004158833 | 7.63375E-06 |
| Protein kinase family protein                 | -34.84617728 | 0.002748854 | 5.6023E-06  |
| N/A                                           | -28.94557823 | 0.00731223  | 1.64078E-05 |
| Galactose oxidase/kelch repeat superfamily p  | -67.56756757 | 0.005375249 | 1.0919E-05  |
| Beige/BEACH domain ;WD domain, G-beta re      | -60.86956522 | 0.001736793 | 2.39194E-06 |
| Outer membrane OMP85 family protein           | -27.07143361 | 2.99E-20    | 3.38267E-25 |
| N/A                                           | -30.4964539  | 0.005851584 | 4.81558E-05 |
| Mitochondrial transcription termination fact  | -35.02739467 | 0.007294819 | 1.63376E-05 |
| phosphatidyl inositol monophosphate 5 kinas   | -26.4957265  | 0.006325378 | 5.39165E-05 |
| Folylpolyglutamate synthetase family protein  | -40.875      | 0.006649015 | 2.02567E-05 |
| demeter-like 1                                | -26.81218851 | 0.005410003 | 1.48334E-05 |
| LETM1-like protein                            | -28.125      | 0.005116276 | 1.36824E-05 |
| N/A                                           | -28.18766393 | 0.000406849 | 1.2234E-06  |
| ribosomal protein L2                          | -29.20458787 | 2.64846E-13 | 1.63461E-17 |
| N/A                                           | -95          | 4.60684E-05 | 2.44257E-08 |
| nuclear RNA polymerase A1                     | -39.69639932 | 4.62287E-14 | 2.30684E-18 |
| nuclear RNA polymerase A1                     | -28.44001897 | 0.00016537  | 1.38113E-07 |
| nuclear RNA polymerase A1                     | -35.78646934 | 7.35679E-14 | 3.816E-18   |

|                                                |              |             |             |
|------------------------------------------------|--------------|-------------|-------------|
| nuclear RNA polymerase A1                      | -34.44770563 | 4.07335E-12 | 3.23616E-16 |
| nuclear RNA polymerase A1                      | -29.05525847 | 0.004191551 | 1.02131E-05 |
| kinesin 1                                      | -32.53333333 | 0.00047896  | 4.43266E-07 |
| N/A                                            | -36.32607705 | 4.36783E-19 | 1.14715E-23 |
| N/A                                            | -33.51032448 | 3.37981E-15 | 9.41851E-20 |
| N/A                                            | -34.53199365 | 0.002964542 | 4.91328E-06 |
| Arginyl-tRNA synthetase, class Ic              | -57.20238095 | 3.26251E-08 | 5.2875E-12  |
| Arginyl-tRNA synthetase, class Ic              | -92.72727273 | 3.89581E-06 | 1.27085E-09 |
| SERINE CARBOXYPEPTIDASE-LIKE 49                | -29.50208706 | 0.001832074 | 3.23705E-06 |
| Ran BP2/NZF zinc finger-like superfamily prot  | -58.33333333 | 7.37312E-34 | 1.93644E-39 |
| Leucine-rich repeat protein kinase family pro  | -78.4591195  | 0.000362188 | 3.75959E-07 |
| Protein kinase family protein with ARM repe    | -57.33333333 | 0.000297765 | 2.43038E-07 |
| VEFS-Box of polycomb protein                   | -26.87598116 | 0.007958909 | 2.62384E-05 |
| ubiquitin-specific protease 13                 | -100         | 0.000703795 | 7.39602E-07 |
| P-loop containing nucleoside triphosphate hy   | -28.59459459 | 0.002241335 | 4.2854E-06  |
| P-loop containing nucleoside triphosphate hy   | -53.31991952 | 0.008189209 | 2.73471E-05 |
| Protein of unknown function (DUF3411)          | -40.1744186  | 0.003482089 | 6.07236E-06 |
| Polynucleotidyl transferase, ribonuclease H-li | -49.15254237 | 0.000881934 | 9.95361E-07 |
| mitochondrially targeted single-stranded DN/   | -38.28551913 | 0.000157291 | 1.13041E-07 |
| RING/U-box superfamily protein                 | -100         | 0.000703795 | 7.39602E-07 |
| N/A                                            | -100         | 0.000703795 | 7.39602E-07 |
| Transducin/WD40 repeat-like superfamily pro    | -26.77433694 | 4.36662E-05 | 6.8502E-08  |
| Nucleolar histone methyltransferase-related    | -28.77894737 | 7.38867E-05 | 1.33172E-07 |
| ARM repeat superfamily protein                 | -44.12818471 | 0.001741729 | 3.01682E-06 |
| N/A                                            | -29.62992889 | 0.004337158 | 3.14229E-05 |
| RNA-binding (RRM/RBD/RNP motifs) family p      | -48.57142857 | 0.009877328 | 2.44901E-05 |
| RNA binding (RRM/RBD/RNP motifs) family p      | -95.23809524 | 1.5665E-05  | 6.46563E-09 |
| N/A                                            | -41.66666667 | 0.000639597 | 2.2338E-06  |
| fatty alcohol oxidase 3                        | -28.86102403 | 0.00042248  | 1.28714E-06 |
| Uncharacterised protein family (UPF0497)       | -38.70967742 | 0.008276243 | 1.93793E-05 |
| Protein of unknown function (DUF810)           | -25.75138009 | 0.006094715 | 1.28409E-05 |
| N/A                                            | -100         | 0.00014754  | 1.03544E-07 |
| nudix hydrolase homolog 26                     | -36.43697019 | 5.48454E-05 | 3.06882E-08 |
| ribosomal protein L6 family protein            | -32.6899456  | 1.58E-06    | 1.13244E-09 |
| Transmembrane amino acid transporter fami      | -100         | 0.000703795 | 7.39602E-07 |
| N/A                                            | -100         | 0.001061922 | 1.54644E-06 |
| Sec1/munc18-like (SM) proteins superfamily     | -76.47058824 | 2.83675E-07 | 6.15771E-11 |
| Zim17-type zinc finger protein                 | -47.02380952 | 1.44069E-05 | 5.8848E-09  |
| Zinc finger (C2H2 type) family protein / trans | -55          | 8.96769E-05 | 5.55738E-08 |
| VIRB2-interacting protein 1                    | -50.71895425 | 0.004230545 | 1.03554E-05 |
| N/A                                            | -38.59649123 | 8.94899E-07 | 2.72637E-10 |
| N/A                                            | -37.5        | 0.006961761 | 1.5362E-05  |
| tubulin beta 8                                 | -43.98335583 | 3.09E-09    | 7.28271E-13 |
| DEAD box RNA helicase (PRH75)                  | -39.02439024 | 0.004346889 | 8.07457E-06 |

|                                                                 |              |             |             |
|-----------------------------------------------------------------|--------------|-------------|-------------|
| Aluminium induced protein with YGL and LRC CVP2 like 1          | -27.59076531 | 2.50E-06    | 1.99762E-09 |
| Cupredoxin superfamily protein                                  | -45.8781362  | 0.003782564 | 8.79935E-06 |
| Protein of unknown function (DUF630 and DUF631)                 | -26.2987013  | 0.0003002   | 2.46346E-07 |
| HMG (high mobility group) box protein with / tonneau 1b (TON1b) | -59.84848485 | 0.003294694 | 7.24691E-06 |
| hydroxyproline-rich glycoprotein family protein                 | -98.61111111 | 3.20131E-08 | 5.14192E-12 |
| target of rapamycin                                             | -27.43589744 | 0.004578929 | 1.16318E-05 |
| N/A                                                             | -37.04274162 | 0.002895672 | 4.78003E-06 |
| Ribosomal protein S5 family protein                             | -100         | 0.000703795 | 7.39602E-07 |
| Ribosomal protein S5 family protein                             | -27.44488412 | 0.00957227  | 9.84952E-05 |
| N/A                                                             | -26.52412281 | 4.04E-08    | 1.38629E-11 |
| pleckstrin homology (PH) domain-containing                      | -45          | 0.001968856 | 3.59766E-06 |
| N/A                                                             | -81.81818182 | 0.001278077 | 1.6121E-06  |
| ralf-like 34                                                    | -44.44444444 | 0.00078803  | 8.54717E-07 |
| P-loop containing nucleoside triphosphate hydrolase             | -35.76923077 | 0.007671471 | 7.16356E-05 |
| Pentatricopeptide repeat (PPR) superfamily protein              | -81.31868132 | 5.91799E-05 | 3.39379E-08 |
| ACT-like protein tyrosine kinase family protein                 | -100         | 7.69704E-05 | 4.65676E-08 |
| Pyridoxal phosphate (PLP)-dependent transaminase                | -34.64912281 | 0.001955079 | 2.87321E-06 |
| Ubiquitin-like superfamily protein                              | -32.49249249 | 1.28E-07    | 5.45277E-11 |
| N/A                                                             | -40          | 0.009723744 | 2.40095E-05 |
| Plant protein of unknown function (DUF827)                      | -40          | 0.009723744 | 2.40095E-05 |
| RING/FYVE/PHD zinc finger superfamily protein                   | -47.27272727 | 0.002980767 | 4.94903E-06 |
| ATPase, F0/V0 complex, subunit C protein                        | -100         | 0.001933999 | 2.83514E-06 |
| beta glucosidase 13                                             | -100         | 5.19877E-12 | 3.2406E-16  |
| SEC14 cytosolic factor family protein / phosphatase             | -26.49859944 | 2.55799E-05 | 3.52831E-08 |
| Ribosomal RNA processing Brix domain protein                    | -28.45827961 | 3.26E-06    | 2.78041E-09 |
| cleavage and polyadenylation specificity factor                 | -100         | 0.001933999 | 2.83514E-06 |
| homolog of histone chaperone HIRA                               | -33.67521368 | 1.40098E-05 | 1.66631E-08 |
| tRNAisopentenyltransferase 2                                    | -32.45415207 | 0.003601836 | 2.42498E-05 |
| Ribosomal protein L24e family protein                           | -72.5        | 0.000646723 | 6.49273E-07 |
| vacuolar protein sorting 41                                     | -41.77927928 | 0.000224392 | 1.73442E-07 |
| ribosomal protein L9                                            | -31.48148148 | 0.002847219 | 4.66873E-06 |
| DNA ligase 1                                                    | -100         | 9.19326E-05 | 5.75246E-08 |
| ABC transporter family protein                                  | -28.8814751  | 4.66678E-05 | 7.46565E-08 |
| Phototropic-responsive NPH3 family protein                      | -90.90909091 | 0.00327541  | 5.60865E-06 |
| receptor kinase 3                                               | -28.91772735 | 1.79E-11    | 2.10584E-15 |
| BTB/POZ/MATH-domains containing protein                         | -28.71496563 | 0.003330041 | 2.1669E-05  |
| Yippee family putative zinc-binding protein                     | -100         | 0.001240448 | 1.54644E-06 |
| N/A                                                             | -100         | 4.32189E-05 | 2.25468E-08 |
| Galactose oxidase/kelch repeat superfamily protein              | -100         | 4.32189E-05 | 2.25468E-08 |
| K-box region and MADS-box transcription factor                  | -100         | 0.001933999 | 2.83514E-06 |
| RNA polymerase II transcription mediators                       | -37.45045188 | 0.001386338 | 6.40178E-06 |
| AGC (cAMP-dependent, cGMP-dependent and                         | -28.8003663  | 0.005714746 | 1.61046E-05 |
|                                                                 | -72.22222222 | 0.000169274 | 1.23391E-07 |

|                                                 |              |             |             |
|-------------------------------------------------|--------------|-------------|-------------|
| AGC (cAMP-dependent, cGMP-dependent an          | -53.84615385 | 0.000543244 | 5.21085E-07 |
| N/A                                             | -28.10522811 | 0.000191201 | 4.50652E-07 |
| mitogen-activated protein kinase kinase kina:   | -90.47619048 | 0.001217272 | 1.48809E-06 |
| Basic-leucine zipper (bZIP) transcription facto | -100         | 0.005353107 | 1.08251E-05 |
| cytochrome BC1 synthesis                        | -34.86756106 | 8.21332E-05 | 1.51914E-07 |
| RNA binding                                     | -33.88648389 | 4.42115E-06 | 1.72431E-09 |
| RNA binding                                     | -37.5        | 0.009161264 | 2.2157E-05  |
| RNA binding                                     | -42.3661509  | 7.06526E-13 | 3.57506E-17 |
| pfkB-like carbohydrate kinase family protein    | -50.58201058 | 0.002499077 | 1.44749E-05 |
| RING/U-box superfamily protein                  | -40.8496732  | 2.05E-10    | 3.41132E-14 |
| N/A                                             | -90          | 0.002116499 | 3.20046E-06 |
| N/A                                             | -90          | 0.002116499 | 3.20046E-06 |
| DHBP synthase RibB-like alpha/beta domain       | -100         | 5.43973E-09 | 6.94116E-13 |
| NOT2 / NOT3 / NOT5 family                       | -43.83561644 | 0.005317911 | 1.06642E-05 |
| Pheophorbide a oxygenase family protein wit     | -42.64705882 | 0.00048679  | 4.51227E-07 |
| PHD finger family protein                       | -31.22015915 | 0.001407023 | 1.82014E-06 |
| cellulose synthase-like B3                      | -76          | 0.004139529 | 1.00211E-05 |
| N/A                                             | -44.83333333 | 0.006177282 | 1.81625E-05 |
| PIF1 helicase                                   | -25.77186964 | 0.003791286 | 2.60551E-05 |
| Protein kinase superfamily protein              | -33.33333333 | 0.000800279 | 1.04092E-06 |
| Protein kinase superfamily protein              | -100         | 0.000277356 | 2.24346E-07 |
| kinesin 3                                       | -51.84275184 | 0.004548366 | 8.56891E-06 |
| Protein kinase superfamily protein              | -25.36509176 | 0.00075029  | 8.00567E-07 |
| S-locus lectin protein kinase family protein    | -83.33333333 | 0.004158833 | 7.63375E-06 |
| S-locus lectin protein kinase family protein    | -41.50943396 | 3.51349E-05 | 5.22633E-08 |
| ARF-GAP domain 5                                | -29.09132007 | 0.000281564 | 7.51431E-07 |
| cyclic nucleotide gated channel 5               | -29.16121801 | 0.005269453 | 1.42408E-05 |
| Domain of unknown function (DUF3598)            | -34.46691176 | 0.008463618 | 2.87525E-05 |
| Leucine-rich repeat transmembrane protein I     | -61.9047619  | 0.002483692 | 3.91964E-06 |
| Uncharacterised BCR, YbaB family COG0718        | -32.99284985 | 0.000136801 | 1.08146E-07 |
| N/A                                             | -26.19047619 | 0.005289772 | 1.43439E-05 |
| homogentisate 1,2-dioxygenase                   | -100         | 0.001240448 | 1.54644E-06 |
| shaggy-like protein kinase 41                   | -91.66666667 | 0.004921546 | 9.61483E-06 |
| ARM repeat superfamily protein                  | -100         | 0.000440203 | 4.00618E-07 |
| DNA/RNA helicase protein                        | -100         | 0.000163436 | 1.18536E-07 |
| Exostosin family protein                        | -40.1299505  | 2.72583E-05 | 3.84011E-08 |
| S-locus lectin protein kinase family protein    | -34.04862317 | 6.03E-07    | 3.47802E-10 |
| S-locus lectin protein kinase family protein    | -45          | 0.001116707 | 1.33731E-06 |
| zinc ion binding                                | -36.73245614 | 0.002133853 | 3.23296E-06 |
| N/A                                             | -100         | 0.001933999 | 2.83514E-06 |
| RING 1A                                         | -27.56699755 | 3.10227E-05 | 1.75582E-08 |
| RING 1A                                         | -59.36853002 | 0.000594354 | 5.82281E-07 |
| global transcription factor group E4            | -90.90909091 | 0.000902374 | 1.02306E-06 |
| Tetratricopeptide repeat (TPR)-like superfam    | -60.86956522 | 0.003804626 | 6.81339E-06 |

|                                                  |              |             |             |
|--------------------------------------------------|--------------|-------------|-------------|
| terpene synthase 21                              | -33.75764994 | 0.000309625 | 8.48334E-07 |
| myosin 2                                         | -65.43209877 | 0.001845373 | 2.58613E-06 |
| Seven transmembrane MLO family protein           | -46.66666667 | 1.56E-07    | 6.85519E-11 |
| Yippee family putative zinc-binding protein      | -72.89719626 | 0.003941291 | 7.1275E-06  |
| N/A                                              | -74.50980392 | 4.92908E-05 | 2.6642E-08  |
| RAB GTPase homolog A1B                           | -63.15789474 | 0.001933999 | 2.76347E-06 |
| Leucine-rich repeat transmembrane protein l      | -30.77211394 | 0.001515491 | 7.22162E-06 |
| senescence-related gene 1                        | -28.06172322 | 0.00049531  | 1.59304E-06 |
| eukaryotic translation initiation factor SUI1 fa | -59.64285714 | 4.56796E-06 | 1.52419E-09 |
| disease resistance family protein / LRR family   | -25.92592593 | 0.003959094 | 9.39458E-06 |
| homolog of yeast ADA2 2A                         | -62.5        | 0.005607374 | 1.15345E-05 |
| N/A                                              | -25.27718802 | 0.003624911 | 2.44862E-05 |
| N/A                                              | -25.89222615 | 8.78E-07    | 5.54152E-10 |
| Endomembrane protein 70 protein family           | -54.05405405 | 0.000115391 | 7.67513E-08 |
| N/A                                              | -47.50957854 | 0.005208049 | 1.40133E-05 |
| N/A                                              | -28.19875776 | 2.20482E-06 | 6.40286E-10 |
| N/A                                              | -49.33333333 | 7.20898E-13 | 3.70064E-17 |
| N/A                                              | -55.93220339 | 1.16646E-06 | 3.6686E-10  |
| N/A                                              | -45.3125     | 1.15695E-08 | 2.02824E-12 |
| high mobility group B2                           | -55.93220339 | 1.16646E-06 | 3.6686E-10  |
| high mobility group B2                           | -45.3125     | 1.15695E-08 | 2.02824E-12 |
| high mobility group B2                           | -28.19875776 | 2.20482E-06 | 6.40286E-10 |
| high mobility group B2                           | -49.33333333 | 7.20898E-13 | 3.70064E-17 |
| P-loop containing nucleoside triphosphate hy     | -86.36363636 | 0.000920785 | 1.25558E-06 |
| alcohol dehydrogenase 1                          | -27.64204545 | 9.8674E-06  | 4.47039E-09 |
| Target of Myb protein 1                          | -96.15384615 | 7.23175E-05 | 4.32753E-08 |
| DNAJ heat shock N-terminal domain-containi       | -51.28205128 | 0.002256342 | 3.48142E-06 |
| Auxin efflux carrier family protein              | -38.46153846 | 0.005600242 | 1.15116E-05 |
| N/A                                              | -37.75946276 | 2.28006E-05 | 3.05002E-08 |
| N/A                                              | -29          | 1.63281E-08 | 2.93751E-12 |
| N/A                                              | -29.18192918 | 0.002752875 | 4.46961E-06 |
| N/A                                              | -27.817005   | 6.69421E-05 | 3.95676E-08 |
| N/A                                              | -42.62295082 | 9.45991E-07 | 2.435E-10   |
| BTB/POZ domain-containing protein                | -25.09070449 | 6.37E-09    | 1.65325E-12 |
| Malectin/receptor-like protein kinase family     | -27.00743049 | 3.37756E-08 | 5.57303E-12 |
| casein lytic proteinase B3                       | -64.86486486 | 0.007775091 | 1.77072E-05 |
| EID1-like 2                                      | -67.85714286 | 0.001764726 | 2.43946E-06 |
| N/A                                              | -64.19753086 | 3.18591E-09 | 4.87397E-13 |
| PIF1 helicase                                    | -25.8382832  | 0.005197601 | 4.0674E-05  |
| NAC domain containing protein 100                | -33.26367119 | 0.001049893 | 1.51174E-06 |
| NAC domain containing protein 100                | -35.93073593 | 0.000651776 | 6.57229E-07 |
| cullin 3                                         | -100         | 0.001933999 | 2.83514E-06 |
| hydroxyproline-rich glycoprotein family prote    | -59.26370548 | 8.63944E-08 | 1.58391E-11 |
| protein kinase 2A                                | -62.85714286 | 0.000555182 | 5.35793E-07 |

|                                               |              |             |             |
|-----------------------------------------------|--------------|-------------|-------------|
| Disease resistance protein (TIR-NBS-LRR class | -36.28318584 | 2.24047E-09 | 3.23635E-13 |
| Disease resistance protein (TIR-NBS-LRR class | -28.57142857 | 0.00179871  | 2.50359E-06 |
| 3'-5' exonuclease domain-containing protei    | -75          | 0.000174085 | 1.27536E-07 |
| MAPK/ERK kinase kinase 1                      | -76.78571429 | 0.000695076 | 7.14128E-07 |
| NOD26-like intrinsic protein 1;2              | -40.77109897 | 4.36857E-05 | 6.85769E-08 |
| lysine-ketoglutarate reductase/saccharopine   | -37.40653863 | 0.000946387 | 3.79934E-06 |
| HAD-superfamily hydrolase, subfamily IG, 5'   | -100         | 0.000534009 | 5.09877E-07 |
| multidrug resistance-associated protein 5     | -100         | 3.22217E-05 | 1.55009E-08 |
| myosin 2                                      | -100         | 5.09444E-06 | 1.74469E-09 |
| GDSL-like Lipase/Acylhydrolase superfamily p  | -35.12817125 | 3.91E-09    | 9.54433E-13 |
| CLIP-associated protein                       | -98.14814815 | 3.25745E-07 | 7.26201E-11 |
| N/A                                           | -37.78901855 | 2.78E-11    | 3.58589E-15 |
| HSP20-like chaperones superfamily protein     | -73.45238095 | 1.23273E-05 | 4.94495E-09 |
| heat shock cognate protein 70-1               | -29.2334248  | 1.79916E-05 | 7.57336E-09 |
| PIF1 helicase                                 | -29.2334248  | 1.79916E-05 | 7.57336E-09 |
| N/A                                           | -29.76506252 | 3.56359E-05 | 5.34068E-08 |
| Protein kinase superfamily protein            | -76.66666667 | 0.000286403 | 2.32504E-07 |
| Protein of unknown function (DUF1336)         | -40.39316975 | 0.00032109  | 3.20664E-07 |
| D111/G-patch domain-containing protein        | -27.91664294 | 1.11E-07    | 4.56176E-11 |
| D111/G-patch domain-containing protein        | -39.57875458 | 0.000160123 | 1.32575E-07 |
| BED zinc finger ;hAT family dimerisation dom  | -91.66666667 | 0.004921546 | 9.61483E-06 |
| Tetratricopeptide repeat (TPR)-like superfam  | -39.44444444 | 0.005983362 | 4.97599E-05 |
| Protein kinase superfamily protein            | -29.95126706 | 0.000577716 | 6.73296E-07 |
| Protein of unknown function (DUF1162)         | -76.15384615 | 0.000576571 | 5.59818E-07 |
| HAESA-like 1                                  | -30.15777309 | 0.000246278 | 2.30427E-07 |
| N/A                                           | -57.44444444 | 0.003594702 | 8.19239E-06 |
| cysteine-rich RLK (RECEPTOR-like protein kin  | -70          | 0.002384256 | 3.72392E-06 |
| Peptidase S24/S26A/S26B/S26C family protei    | -50.02462448 | 9.24063E-12 | 6.09888E-16 |
| Disease resistance protein (TIR-NBS-LRR class | -68.08510638 | 0.000173994 | 1.27341E-07 |
| Phosphatidylinositol-4-phosphate 5-kinase fa  | -100         | 0.001933999 | 2.83514E-06 |
| nuclear RNA polymerase D1B                    | -57.57575758 | 0.002729491 | 4.41964E-06 |
| uridine 5'-monophosphate synthase / UMP :     | -54.76190476 | 6.33109E-05 | 3.70035E-08 |
| CBS domain-containing protein with a domain   | -100         | 0.000703795 | 7.39602E-07 |
| auxin response factor 8                       | -48.17391304 | 0.00283208  | 4.63665E-06 |
| Integrin-linked protein kinase family         | -32.64051522 | 8.46318E-06 | 3.12802E-09 |
| N/A                                           | -27.63918252 | 0.003546663 | 6.22648E-06 |
| glutamate receptor 2.7                        | -34.50292398 | 0.004743378 | 1.22429E-05 |
| glutamate receptor 2.7                        | -51.35746606 | 0.002239627 | 3.44413E-06 |
| Homeodomain-like transcriptional regulator    | -28.62318841 | 8.59852E-06 | 3.18435E-09 |
| Homeodomain-like transcriptional regulator    | -51.51515152 | 0.001166073 | 5.03242E-06 |
| callose synthase 5                            | -74.46808511 | 0.003426762 | 5.93818E-06 |
| STRUBBELIG-receptor family 3                  | -88.37209302 | 3.00516E-05 | 1.41044E-08 |
| pyrophosphorylase 6                           | -100         | 0.001933999 | 2.83514E-06 |
| RING/U-box superfamily protein                | -89.76190476 | 7.70025E-06 | 2.77828E-09 |



|                                                |              |             |             |
|------------------------------------------------|--------------|-------------|-------------|
| interactor of constitutive active rops 1       | -31.88932981 | 8.90E-14    | 4.83429E-18 |
| MATE efflux family protein                     | -28.47144457 | 0.000220413 | 1.69235E-07 |
| P-loop containing nucleoside triphosphate hy   | -43.33333333 | 3.01E-07    | 1.51503E-10 |
| Nucleotidyltransferase family protein          | -65.85365854 | 0.00338527  | 5.84145E-06 |
| Leucine-rich repeat (LRR) family protein       | -63.07692308 | 0.004223776 | 7.77154E-06 |
| myosin 2                                       | -52.56099832 | 7.75942E-08 | 1.37136E-11 |
| BURP domain-containing protein                 | -30.27912621 | 0.001234475 | 1.51365E-06 |
| BURP domain-containing protein                 | -80.71428571 | 0.001273263 | 1.97633E-06 |
| BURP domain-containing protein                 | -45.95393253 | 1.25E-17    | 2.48234E-22 |
| WRKY DNA-binding protein 69                    | -90          | 0.000525153 | 4.9603E-07  |
| Protein kinase superfamily protein             | -100         | 1.80662E-05 | 7.75047E-09 |
| photosynthetic electron transfer C             | -76.05633803 | 0.001240448 | 1.53359E-06 |
| Receptor-like protein kinase-related family pi | -44.68085106 | 3.66052E-05 | 2.15089E-08 |
| Receptor-like protein kinase-related family pi | -49.93257417 | 1.90841E-09 | 2.16925E-13 |
| N/A                                            | -91.17647059 | 2.43309E-06 | 7.30736E-10 |
| 4-hydroxy-3-methylbut-2-enyl diphosphate s'    | -77.22222222 | 0.001213165 | 1.47951E-06 |
| N/A                                            | -47.87878788 | 6.31017E-05 | 1.09279E-07 |
| ETHYLENE-INSENSITIVE3-like 3                   | -53.03571429 | 0.000431551 | 3.88947E-07 |
| Tetratricopeptide repeat (TPR)-like superfam   | -48.29956156 | 1.51E-08    | 4.52304E-12 |
| Calcium-dependent phosphotriesterase supe      | -48.29956156 | 1.51E-08    | 4.52304E-12 |
| RNA methyltransferase family protein           | -38.88888889 | 0.002379863 | 1.35136E-05 |
| ENTH/VHS family protein                        | -68.125      | 0.001408473 | 1.82508E-06 |
| Leucine-rich repeat family protein             | -29.30094386 | 1.03E-18    | 1.56201E-23 |
| GPI transamidase component Gpi16 subunit f     | -25.12768131 | 0.001982337 | 1.04439E-05 |
| N/A                                            | -100         | 6.72491E-06 | 2.39678E-09 |
| autoinhibited Ca(2+)-ATPase 9                  | -75.75757576 | 3.78E-12    | 3.38919E-16 |
| autoinhibited Ca(2+)-ATPase 9                  | -53.48837209 | 4.74737E-05 | 2.97057E-08 |
| microtubule-associated proteins 65-1           | -43.24561404 | 0.004676298 | 8.89566E-06 |
| polymerase gamma 2                             | -34.61538462 | 0.001632497 | 2.21119E-06 |
| NPR1-like protein 3                            | -32.05808081 | 0.003347015 | 7.40115E-06 |
| F-box protein 2                                | -33.33333333 | 0.000692662 | 2.47858E-06 |
| F-box protein 2                                | -80          | 0.007209879 | 1.6121E-05  |
| Structural maintenance of chromosomes (SM      | -95.45454545 | 0.000221651 | 1.7051E-07  |
| RNA-binding KH domain-containing protein       | -41.51747656 | 0.005278573 | 1.42828E-05 |
| sorting nexin 2B                               | -26.84556696 | 0.00032339  | 8.99516E-07 |
| Regulator of chromosome condensation (RCC      | -72.5        | 0.001141307 | 1.37346E-06 |
| Pentatricopeptide repeat (PPR-like) superfan   | -87.5        | 0.00077132  | 8.32057E-07 |
| sec7 domain-containing protein                 | -71.23287671 | 0.00022659  | 1.75472E-07 |
| THO complex, subunit 5                         | -96          | 9.45691E-05 | 5.99196E-08 |
| N/A                                            | -46.529723   | 3.43446E-09 | 4.13056E-13 |
| Pseudouridine synthase family protein          | -36.88311688 | 0.009989518 | 3.70912E-05 |
| Transketolase family protein                   | -75          | 0.003437998 | 5.97278E-06 |
| nucleotide binding protein 35                  | -34.11764706 | 5.68216E-09 | 7.29218E-13 |
| Small nuclear ribonucleoprotein family prote   | -38.25161887 | 0.003002729 | 4.99582E-06 |

|                                                |              |             |             |
|------------------------------------------------|--------------|-------------|-------------|
| N/A                                            | -35.71428571 | 0.000850746 | 3.28016E-06 |
| G protein alpha subunit 1                      | -100         | 0.000440203 | 4.00618E-07 |
| Chalcone-flavanone isomerase family protein    | -37.14285714 | 6.05681E-05 | 3.5045E-08  |
| ACT-like protein tyrosine kinase family protei | -55.78378378 | 4.06196E-05 | 2.06729E-08 |
| Peroxidase superfamily protein                 | -28.23335021 | 3.627E-12   | 2.81011E-16 |
| cullin 1                                       | -30.84571852 | 1.47E-09    | 3.15044E-13 |
| ARF-GAP domain 15                              | -41.81818182 | 6.42181E-10 | 8.05349E-14 |
| ARF-GAP domain 15                              | -48.55072464 | 5.47955E-05 | 3.55824E-08 |
| N/A                                            | -31.12033195 | 2.59439E-15 | 1.06758E-19 |
| N/A                                            | -43.24324324 | 0.003302396 | 5.66212E-06 |
| N/A                                            | -47.5        | 0.000950387 | 1.31487E-06 |
| N/A                                            | -43.36170213 | 0.00282938  | 4.62703E-06 |
| delta1-pyrroline-5-carboxylate synthase 1      | -38.46153846 | 0.005037736 | 1.33897E-05 |
| TRS120                                         | -100         | 0.000796198 | 8.74075E-07 |
| N/A                                            | -63.89578164 | 1.22614E-06 | 3.26402E-10 |
| SET domain group 29                            | -63.89578164 | 1.22614E-06 | 3.26402E-10 |
| Polynucleotidyl transferase, ribonuclease H-li | -31.93582649 | 3.16895E-06 | 1.17143E-09 |
| Polynucleotidyl transferase, ribonuclease H-li | -27.12943275 | 1.27598E-07 | 2.99093E-11 |
| Protein of unknown function, DUF593            | -25.33125    | 0.00559587  | 1.56153E-05 |
| alcohol dehydrogenase 1                        | -62.73465957 | 3.90416E-09 | 4.75272E-13 |
| LisH dimerisation motif;WD40/YVTN repeat-l     | -66.66666667 | 0.000865438 | 1.14982E-06 |
| RING/U-box superfamily protein                 | -52.08333333 | 0.006823164 | 1.49361E-05 |
| Protein of unknown function (DUF1218)          | -31.02275538 | 7.41E-06    | 7.68396E-09 |
| ubiquitin-specific protease 26                 | -36.80555556 | 0.006028518 | 1.26793E-05 |
| ubiquitin-specific protease 26                 | -100         | 0.001240448 | 1.54644E-06 |
| DNA topoisomerase, type IA, core               | -34.16208791 | 0.000897336 | 1.01603E-06 |
| N/A                                            | -28.28455458 | 0.003180295 | 2.03587E-05 |
| Ribosomal protein L14                          | -40.93406593 | 0.001023852 | 1.46013E-06 |
| bromo-adjacent homology (BAH) domain-cor       | -33.67256637 | 0.004803448 | 1.24831E-05 |
| Tetratricopeptide repeat (TPR)-like superfam   | -100         | 0.001933999 | 2.83514E-06 |
| signal peptide peptidase                       | -55.53359684 | 0.006171873 | 1.81257E-05 |
| appr-1-p processing enzyme family protein      | -72.70114943 | 0.001833685 | 3.24351E-06 |
| N/A                                            | -58.01838611 | 0.005049871 | 1.34295E-05 |
| disease resistance protein (TIR-NBS-LRR class  | -42.37762238 | 0.001610535 | 7.84546E-06 |
| Tetratricopeptide repeat (TPR)-like superfam   | -40.06159015 | 0.006437877 | 1.38047E-05 |
| Tetratricopeptide repeat (TPR)-like superfam   | -36.02150538 | 3.33794E-05 | 1.62782E-08 |
| Tetratricopeptide repeat (TPR)-like superfam   | -76.92307692 | 0.009041152 | 2.17936E-05 |
| Tetratricopeptide repeat (TPR)-like superfam   | -46.31578947 | 3.05399E-12 | 2.32605E-16 |
| N/A                                            | -53.84615385 | 0.000498983 | 5.56771E-07 |
| N/A                                            | -37.28813559 | 3.41544E-10 | 4.059E-14   |
| N/A                                            | -33.68159204 | 0.000178546 | 1.32245E-07 |
| DNAJ heat shock N-terminal domain-containi     | -77.71929825 | 0.000281029 | 2.71281E-07 |
| NADH-dependent glutamate synthase 1            | -34.48275862 | 0.009612209 | 3.495E-05   |
| NADH-dependent glutamate synthase 1            | -34.93150685 | 5.21247E-07 | 1.49219E-10 |

|                                                 |              |             |             |
|-------------------------------------------------|--------------|-------------|-------------|
| NADH-dependent glutamate synthase 1             | -63.63636364 | 2.02431E-10 | 2.326E-14   |
| NADH-dependent glutamate synthase 1             | -35.18156121 | 0.000290218 | 2.35814E-07 |
| Ribonuclease II/R family protein                | -28.82675439 | 1.87289E-08 | 3.44097E-12 |
| Ribonuclease II/R family protein                | -31.01265823 | 9.38846E-13 | 6.53421E-17 |
| N/A                                             | -33.63248967 | 0.000114373 | 8.80129E-08 |
| N/A                                             | -33.36627141 | 3.55252E-11 | 3.33554E-15 |
| N/A                                             | -32.74336283 | 1.12545E-09 | 1.4853E-13  |
| N/AMETHYLATED_REGION                            | -46.35897436 | 0.005869797 | 1.67882E-05 |
| O-fucosyltransferase family protein             | -29.13806255 | 0.006909491 | 1.51757E-05 |
| O-fucosyltransferase family protein             | -37.96061723 | 3.49894E-11 | 2.71987E-15 |
| ER lumen protein retaining receptor family p    | -37.61276374 | 6.80E-06    | 6.88697E-09 |
| phosphoenolpyruvate carboxylase-related kir     | -27.20848057 | 4.31E-09    | 1.06025E-12 |
| Target SNARE coiled-coil domain protein         | -100         | 1.13095E-05 | 4.42884E-09 |
| N/A                                             | -54.88721805 | 0.001165037 | 1.408E-06   |
| TRAF-type zinc finger-related                   | -75          | 0.009307931 | 2.26619E-05 |
| Transketolase family protein                    | -47.54221388 | 0.001146058 | 1.38086E-06 |
| RNAse E/G-like                                  | -83.63636364 | 0.000206026 | 1.56375E-07 |
| B-box type zinc finger protein with CCT doma    | -27.94117647 | 0.000803199 | 8.84706E-07 |
| phosphate transporter 4;3                       | -50.79365079 | 0.000937613 | 1.07539E-06 |
| RNA recognition motif (RRM)-containing prot     | -28.70286576 | 0.005958211 | 1.71565E-05 |
| WRKY DNA-binding protein 4                      | -38.10786914 | 1.86E-08    | 5.71297E-12 |
| Protein of unknown function (DUF567)            | -52.13600697 | 0.000739207 | 7.86573E-07 |
| O-methyltransferase family protein              | -29.6875     | 1.67536E-05 | 2.06414E-08 |
| O-methyltransferase family protein              | -47.22222222 | 0.003166326 | 6.8523E-06  |
| Basic-leucine zipper (bZIP) transcription facto | -55.83982202 | 0.000400739 | 3.55887E-07 |
| N/A                                             | -49.74025974 | 0.000107393 | 8.15837E-08 |
| LYR family of Fe/S cluster biogenesis protein   | -44.8630137  | 0.005976975 | 1.25358E-05 |
| P-loop containing nucleoside triphosphate hy    | -31.71101017 | 0.000241156 | 6.10833E-07 |
| Molecular chaperone Hsp40/DnaJ family prot      | -29.75743936 | 0.000404024 | 4.2975E-07  |
| chitinase A                                     | -30.15151515 | 0.001574304 | 2.11389E-06 |
| Poly (ADP-ribose) glycohydrolase (PARG)         | -30.80882353 | 0.000740004 | 7.88125E-07 |
| beta galactosidase 1                            | -100         | 0.000703795 | 7.39602E-07 |
| casein kinase 1-like protein 2                  | -38.63636364 | 0.000440203 | 3.97918E-07 |
| casein kinase 1-like protein 2                  | -32.07920792 | 2.23E-28    | 6.78936E-34 |
| ARM repeat superfamily protein                  | -26.02739726 | 0.003444049 | 7.74229E-06 |
| N/A                                             | -25.60825377 | 3.5484E-05  | 5.30169E-08 |
| N/A                                             | -28.15934066 | 0.000509566 | 1.65416E-06 |
| ACT domain-containing protein                   | -62.98003072 | 0.002363058 | 3.67554E-06 |
| emp24/gp25L/p24 family/GOLD family prote        | -27.69024817 | 0.008824935 | 8.76413E-05 |
| emp24/gp25L/p24 family/GOLD family prote        | -34.30499325 | 0.005547905 | 1.53977E-05 |
| Tetratricopeptide repeat (TPR)-like superfam    | -30.55555556 | 0.000403249 | 3.58411E-07 |
| pyruvate decarboxylase-2                        | -30.55555556 | 0.000403249 | 3.58411E-07 |
| K-box region and MADS-box transcription fac     | -41.0130719  | 6.29E-06    | 6.23898E-09 |
| dynamamin-related protein 3A                    | -100         | 0.000277356 | 2.24346E-07 |

|                                               |              |             |             |
|-----------------------------------------------|--------------|-------------|-------------|
| aldehyde dehydrogenase 6B2                    | -46.04519774 | 2.18E-06    | 1.67225E-09 |
| Aluminium induced protein with YGL and LRC    | -27.56201129 | 0.000295801 | 8.00393E-07 |
| glucan synthase-like 1                        | -75.71428571 | 0.001378557 | 1.77119E-06 |
| protease-related                              | -25.10712894 | 0.001119278 | 1.6653E-06  |
| Ankyrin repeat family protein                 | -40.29888551 | 2.64031E-11 | 2.0137E-15  |
| chromatin remodeling factor17                 | -35.06979063 | 0.000320942 | 2.67369E-07 |
| beta-amylase 3                                | -74.19354839 | 0.005032822 | 9.90604E-06 |
| N/A                                           | -37.81609195 | 0.000124483 | 8.37112E-08 |
| Thymidine kinase                              | -55.31400966 | 0.00294017  | 4.85564E-06 |
| Galactose oxidase/kelch repeat superfamily ꞑ  | -100         | 0.000796198 | 8.74075E-07 |
| PSAJ                                          | -81.77777778 | 2.8487E-23  | 2.61859E-28 |
| PSAJ                                          | -95.85492228 | 4.21979E-28 | 1.85673E-33 |
| PSAJ                                          | -37.86163522 | 2.68576E-11 | 2.46881E-15 |
| PSAJ                                          | -78.37465565 | 4.31419E-06 | 1.43003E-09 |
| NPR1-like protein 3                           | -44.96551724 | 0.009341857 | 3.32511E-05 |
| Ubiquitin carboxyl-terminal hydrolase family  | -66.15384615 | 5.61302E-05 | 3.65965E-08 |
| Plant invertase/pectin methylesterase inhibit | -38.4496124  | 2.38E-07    | 1.15327E-10 |
| Drought-responsive family protein             | -29.07779791 | 2.70551E-05 | 3.79912E-08 |
| homolog of yeast sucrose nonfermenting 4      | -100         | 3.11045E-05 | 1.47354E-08 |
| Protein kinase superfamily protein            | -35.87301587 | 0.003911856 | 9.23625E-06 |
| N/A                                           | -27.08333333 | 0.004710357 | 1.21236E-05 |
| DNA binding;DNA-directed RNA polymerases      | -26.12179487 | 9.94E-07    | 6.4095E-10  |
| homolog of CFIM-25                            | -37.44377811 | 0.000569755 | 1.91985E-06 |
| nuclear factor Y, subunit A5                  | -30.82251082 | 0.002105683 | 3.16712E-06 |
| N/A                                           | -35.67176871 | 0.003042672 | 6.47753E-06 |
| XS domain-containing protein / XS zinc finger | -34.06593407 | 1.71117E-09 | 1.91995E-13 |
| XS domain-containing protein / XS zinc finger | -34.06593407 | 1.71117E-09 | 1.91995E-13 |
| P-loop containing nucleoside triphosphate hy  | -27.53623188 | 0.007946427 | 1.82794E-05 |
| Riboflavin synthase-like superfamily protein  | -36.14457831 | 3.64193E-07 | 9.73053E-11 |
| Riboflavin synthase-like superfamily protein  | -28.49162011 | 1.01598E-09 | 1.32749E-13 |
| Riboflavin synthase-like superfamily protein  | -29.92989452 | 1.10901E-16 | 3.85928E-21 |
| Riboflavin synthase-like superfamily protein  | -42.52960443 | 2.2436E-13  | 1.35527E-17 |
| Riboflavin synthase-like superfamily protein  | -38.23529412 | 1.36355E-06 | 3.73979E-10 |
| Riboflavin synthase-like superfamily protein  | -31.81818182 | 0.001853486 | 2.60158E-06 |
| Riboflavin synthase-like superfamily protein  | -25.97402597 | 0.005066751 | 9.98397E-06 |
| VPS54                                         | -69.56521739 | 0.000453169 | 4.9452E-07  |
| VPS54                                         | -57.28669846 | 8.48188E-05 | 6.09817E-08 |
| Outer arm dynein light chain 1 protein        | -26.70977011 | 0.001104377 | 4.66705E-06 |
| cation-chloride co-transporter 1              | -27.63377926 | 6.47E-07    | 3.78981E-10 |
| binding;RNA binding                           | -54.16666667 | 0.001687678 | 2.31192E-06 |
| Pentatricopeptide repeat (PPR) superfamily ꞑ  | -30.30165913 | 1.78499E-18 | 3.53433E-23 |
| Pentatricopeptide repeat (PPR) superfamily ꞑ  | -35.71428571 | 1.00554E-09 | 1.05053E-13 |
| Pentatricopeptide repeat (PPR) superfamily ꞑ  | -28.57142857 | 0.005615953 | 1.15686E-05 |
| Pentatricopeptide repeat (PPR) superfamily ꞑ  | -33.33333333 | 0.000329424 | 3.30933E-07 |

|                                                 |              |             |             |
|-------------------------------------------------|--------------|-------------|-------------|
| Major facilitator superfamily protein           | -38.82896764 | 0.006502606 | 1.40293E-05 |
| XH/XS domain-containing protein                 | -41.07142857 | 0.001781599 | 2.46801E-06 |
| XH/XS domain-containing protein                 | -27.22359532 | 3.5589E-09  | 5.51469E-13 |
| XH/XS domain-containing protein                 | -42.28221788 | 3.5242E-08  | 6.94185E-12 |
| XH/XS domain-containing protein                 | -28.57603612 | 0.000566192 | 6.56148E-07 |
| XH/XS domain-containing protein                 | -27.10341144 | 9.17156E-06 | 4.10697E-09 |
| XH/XS domain-containing protein                 | -30.92497869 | 6.32629E-06 | 2.66257E-09 |
| Ribosomal protein L13 family protein            | -94.44444444 | 5.47806E-06 | 1.88812E-09 |
| N/A                                             | -48.33333333 | 6.53496E-05 | 4.45383E-08 |
| guanyl-nucleotide exchange factors;GTPase b     | -100         | 0.000440203 | 4.00618E-07 |
| guanyl-nucleotide exchange factors;GTPase b     | -54.13533835 | 0.002144564 | 3.25705E-06 |
| myosin 2                                        | -33.49078885 | 4.2188E-06  | 1.63154E-09 |
| myosin 2                                        | -35.48412144 | 2.53041E-06 | 8.97176E-10 |
| cyclophilin 59                                  | -27.96296296 | 0.007251536 | 2.28684E-05 |
| S-locus lectin protein kinase family protein    | -43.64295125 | 0.001448062 | 6.79174E-06 |
| cycling DOF factor 1                            | -50          | 0.008532816 | 2.02116E-05 |
| Ca(2)-dependent phospholipid-binding prote      | -62.78801843 | 0.001061922 | 1.54889E-06 |
| long-chain acyl-CoA synthetase 7                | -31.89655172 | 0.004169739 | 1.01135E-05 |
| beta galactosidase 9                            | -29.52586207 | 0.001981666 | 3.62628E-06 |
| Disease resistance protein (TIR-NBS-LRR class   | -32.84406141 | 0.008034062 | 1.85581E-05 |
| N/A                                             | -41.76319176 | 1.37E-07    | 5.91722E-11 |
| nuclear RNA polymerase D1B                      | -96.77419355 | 7.75404E-06 | 2.80337E-09 |
| N/A                                             | -40          | 1.95441E-07 | 4.09612E-11 |
| N/A                                             | -48.53560931 | 1.80111E-23 | 1.58499E-28 |
| N/A                                             | -33.33333333 | 1.00118E-05 | 4.56866E-09 |
| cytochrome P450, family 72, subfamily A, pol    | -46.66877838 | 9.92563E-11 | 1.0537E-14  |
| cytochrome P450, family 72, subfamily A, pol    | -35.9375     | 0.006953375 | 2.1572E-05  |
| cytochrome P450, family 72, subfamily A, pol    | -28.16901408 | 0.006782381 | 2.08233E-05 |
| cytochrome P450, family 72, subfamily A, pol    | -52.11267606 | 1.24175E-07 | 2.41316E-11 |
| cytochrome P450, family 72, subfamily A, pol    | -48.24561404 | 4.63306E-12 | 2.85399E-16 |
| cytochrome P450, family 72, subfamily A, pol    | -34.42622951 | 0.000603677 | 5.95432E-07 |
| Ribosomal protein L18ae family                  | -27.55102041 | 0.000917646 | 1.24812E-06 |
| NB-ARC domain-containing disease resistanc      | -25.96153846 | 0.008774511 | 8.68731E-05 |
| photosystem II reaction center protein K prec   | -29.04692082 | 0.004195621 | 1.02423E-05 |
| photosystem II reaction center protein K prec   | -46.38709981 | 7.9429E-17  | 1.8057E-21  |
| Family of unknown function (DUF572)             | -56.15079365 | 1.12E-06    | 7.35589E-10 |
| glutathione S-transferase TAU 20                | -41.74962293 | 0.000583123 | 6.81895E-07 |
| Ribosomal protein L1p/L10e family               | -31.62393162 | 2.66834E-08 | 4.03101E-12 |
| N/A                                             | -26.75       | 2.29779E-05 | 3.08073E-08 |
| Lojap-related protein                           | -31.05921089 | 1.46572E-06 | 1.03319E-09 |
| eukaryotic translation initiation factor 2 gami | -33.1443299  | 0.005499539 | 1.12481E-05 |
| tetratricopeptide repeat (TPR)-containing prc   | -58.33333333 | 0.004902405 | 9.50913E-06 |
| N/A                                             | -33.78378378 | 1.5665E-05  | 6.46763E-09 |
| telomerase reverse transcriptase                | -26.96629213 | 0.008716825 | 2.07434E-05 |

|                                                 |              |             |             |
|-------------------------------------------------|--------------|-------------|-------------|
| ATPases;nucleotide binding;ATP binding;nucl     | -100         | 5.17853E-08 | 8.81988E-12 |
| Transcription initiation factor TFIID subunit A | -100         | 0.001933999 | 2.83514E-06 |
| Small nuclear ribonucleoprotein family prote    | -71.83673469 | 0.004596086 | 8.6824E-06  |
| exocyst complex component sec10                 | -52.5        | 1.32714E-06 | 3.60236E-10 |
| pyruvate dehydrogenase E1 alpha                 | -84.72222222 | 2.59003E-05 | 1.1966E-08  |
| Plant protein 1589 of unknown function          | -40.12195122 | 0.003019842 | 5.02766E-06 |
| ARM repeat superfamily protein                  | -85.48387097 | 1.03034E-05 | 3.92906E-09 |
| ARM repeat superfamily protein                  | -49.73488865 | 0.002674408 | 4.30691E-06 |
| adenosine-5\'-phosphosulfate (APS) kinase 3     | -100         | 0.001933999 | 2.83514E-06 |
| BED zinc finger ;hAT family dimerisation dom    | -43.66197183 | 0.000209491 | 5.07566E-07 |
| ARM repeat superfamily protein                  | -100         | 0.001933999 | 2.83514E-06 |
| ENTH/VHS family protein                         | -63.26530612 | 5.57695E-05 | 3.1356E-08  |
| N/A                                             | -39.40985246 | 0.004639193 | 1.18491E-05 |
| N/A                                             | -41.74174174 | 3.0417E-05  | 1.71555E-08 |
| regulatory particle triple-A 1A                 | -42.56542997 | 0.000258456 | 2.06595E-07 |
| Alpha-L RNA-binding motif/Ribosomal protei      | -88.46153846 | 0.00085171  | 1.12516E-06 |
| GDSL-motif lipase 5                             | -50          | 0.009924873 | 3.67925E-05 |
| GDSL-motif lipase 5                             | -92.85714286 | 1.45627E-05 | 5.95911E-09 |
| alpha/beta-Hydrolases superfamily protein       | -25.24938829 | 2.29E-07    | 1.10348E-10 |
| NAC domain containing protein 85                | -89.47368421 | 0.000353867 | 3.02268E-07 |
| N/A                                             | -81.48148148 | 0.002338159 | 3.62995E-06 |
| Uncharacterised protein family (UPF0497)        | -35.56231003 | 0.009235795 | 3.26674E-05 |
| N/A                                             | -44.52347084 | 0.003538729 | 6.19709E-06 |
| translocase inner membrane subunit 17-2         | -43.77300408 | 9.15E-08    | 3.64649E-11 |
| Disease resistance protein (TIR-NBS-LRR class   | -80.64516129 | 0.003948253 | 7.14299E-06 |
| N/A                                             | -30.6981982  | 0.000398413 | 4.21951E-07 |
| N/A                                             | -27.83411807 | 0.009386163 | 9.58036E-05 |
| Protein of unknown function (DUF674)            | -27.83411807 | 0.009386163 | 9.58036E-05 |
| male gametophyte defective 3                    | -62.82051282 | 0.008480288 | 2.8838E-05  |
| Ribosomal protein L13 family protein            | -53.11594203 | 0.00839767  | 2.84237E-05 |
| RNA recognition motif (RRM)-containing prot     | -100         | 2.67194E-09 | 3.1547E-13  |
| Leucine-rich repeat protein kinase family pro   | -100         | 0.001240448 | 1.54644E-06 |
| Endoribonuclease/protein kinase IRE1-like       | -35.21380345 | 0.002058826 | 1.10079E-05 |
| RNA polymerase I specific transcription initial | -28.0377735  | 5.82596E-09 | 9.45424E-13 |
| RNA polymerase I specific transcription initial | -33.20261438 | 3.5453E-07  | 8.11174E-11 |
| Glucose-6-phosphate/phosphate translocato       | -40.95238095 | 0.001045479 | 1.50195E-06 |
| Subtilase family protein                        | -48.71794872 | 0.009904325 | 3.66578E-05 |
| ATPase, FO complex, subunit B/B\' , bacterial/  | -49.24242424 | 0.009083579 | 3.19382E-05 |
| ATP synthase subunit alpha                      | -49.24242424 | 0.009083579 | 3.19382E-05 |
| diacylglycerol acyltransferase family           | -26.4203985  | 0.003476223 | 7.8538E-06  |
| diacylglycerol acyltransferase family           | -28.4376672  | 0.00164362  | 2.78645E-06 |
| Disease resistance protein (TIR-NBS-LRR class   | -31.02380952 | 1.16155E-05 | 1.31833E-08 |
| TSL-kinase interacting protein 1                | -54.20899855 | 0.00272876  | 4.4147E-06  |
| calcium-dependent protein kinase 28             | -100         | 0.001240448 | 1.54644E-06 |

|                                                |              |             |             |
|------------------------------------------------|--------------|-------------|-------------|
| Protein of unknown function (DUF1640)          | -52.59259259 | 0.008333981 | 2.80684E-05 |
| S-adenosyl-L-methionine-dependent methylt      | -37.14285714 | 0.005646928 | 1.16614E-05 |
| N/A                                            | -56.25       | 0.000137899 | 9.46457E-08 |
| N/A                                            | -50          | 0.009301166 | 3.30513E-05 |
| ARM repeat superfamily protein                 | -43.47826087 | 0.004696663 | 8.95162E-06 |
| ARM repeat superfamily protein                 | -95.23809524 | 6.30823E-05 | 3.66386E-08 |
| Protein of unknown function (DUF677)           | -55.73770492 | 0.005976975 | 1.25256E-05 |
| Protein of unknown function (DUF1162)          | -71.66666667 | 0.000594354 | 5.81537E-07 |
| Disease resistance protein (TIR-NBS-LRR class  | -38.46153846 | 0.005600242 | 1.15116E-05 |
| nudix hydrolase homolog 12                     | -31.89908683 | 0.003007079 | 6.34577E-06 |
| novel cap-binding protein                      | -100         | 0.005353107 | 1.08251E-05 |
| glutathione-disulfide reductase                | -61.29032258 | 0.004675962 | 8.88473E-06 |
| disease resistance protein (TIR-NBS-LRR class  | -33.33333333 | 7.82812E-05 | 4.7705E-08  |
| HSP20-like chaperones superfamily protein      | -42.15180545 | 0.000143484 | 1.149E-07   |
| Protein Transporter, Pam16                     | -56.15989515 | 1.16384E-12 | 8.17656E-17 |
| disease resistance family protein / LRR family | -36.87641723 | 0.000330287 | 3.32884E-07 |
| multidrug resistance-associated protein 14     | -52.50965251 | 0.004811332 | 1.25256E-05 |
| disease resistance family protein / LRR family | -45.69892473 | 0.003522876 | 7.98475E-06 |
| disease resistance family protein / LRR family | -28.73176207 | 0.008465582 | 2.87647E-05 |
| Arabidopsis thaliana protein of unknown func   | -78.125      | 3.20131E-08 | 5.16483E-12 |
| Myosin heavy chain-related protein             | -57.67195767 | 0.002694784 | 4.35158E-06 |
| CAP160 protein                                 | -38.85714286 | 0.003460821 | 6.02766E-06 |
| HXXXD-type acyl-transferase family protein     | -25.62230335 | 0.000306799 | 8.36889E-07 |
| RNA helicase family protein                    | -25.56536866 | 0.003871064 | 9.07894E-06 |
| tRNA synthetase class I (I, L, M and V) family | -90.90909091 | 4.90256E-07 | 1.15767E-10 |
| CBS domain-containing protein with a domain    | -31.47514105 | 1.34359E-05 | 1.57827E-08 |
| Galactose oxidase/kelch repeat superfamily p   | -98.46153846 | 1.4959E-08  | 2.09528E-12 |
| CW-type Zinc Finger                            | -100         | 0.000440203 | 4.00618E-07 |
| multifunctional protein 2                      | -27.40046838 | 2.26E-08    | 7.11949E-12 |
| multifunctional protein 2                      | -100         | 1.79916E-05 | 7.62613E-09 |
| ATP-citrate lyase B-1                          | -58.33333333 | 0.00391402  | 7.06096E-06 |
| ubiquitin protein ligase 6                     | -52.38095238 | 0.005615459 | 1.15552E-05 |
| pleiotropic drug resistance 9                  | -61.84210526 | 0.004592132 | 8.67156E-06 |
| N/A                                            | -75.65217391 | 0.008144325 | 2.70956E-05 |
| Haloacid dehalogenase-like hydrolase (HAD) :   | -91.66666667 | 0.000188727 | 1.41723E-07 |
| F-box family protein                           | -29.87109137 | 1.70661E-05 | 2.11217E-08 |
| Auxin efflux carrier family protein            | -26.63776114 | 6.56E-09    | 1.71198E-12 |
| PA-domain containing subtilase family protei   | -35.33204384 | 0.009569385 | 2.35301E-05 |
| Core-2/I-branching beta-1,6-N-acetylglucosar   | -28.18181818 | 0.003315973 | 2.15522E-05 |
| Core-2/I-branching beta-1,6-N-acetylglucosar   | -54.20168067 | 0.003901756 | 7.02676E-06 |
| Transducin/WD40 repeat-like superfamily pr     | -62.5        | 3.94347E-06 | 1.29846E-09 |
| Phosphoribulokinase / Uridine kinase family    | -78.125      | 0.000152866 | 1.09163E-07 |
| tRNA synthetase beta subunit family protein    | -93.75       | 0.000825161 | 9.20394E-07 |
| Transducin family protein / WD-40 repeat far   | -100         | 0.001933999 | 2.83514E-06 |

|                                               |              |             |             |
|-----------------------------------------------|--------------|-------------|-------------|
| N/A                                           | -29.11681371 | 2.40E-10    | 4.08646E-14 |
| N/A                                           | -44.48346503 | 5.64E-06    | 5.44338E-09 |
| plastid transcriptionally active 2            | -29.71264368 | 0.000459098 | 5.03101E-07 |
| plastid transcriptionally active 2            | -58.82352941 | 0.001239085 | 1.52203E-06 |
| malate dehydrogenase                          | -68.75       | 0.007623546 | 1.72863E-05 |
| Ribosomal protein S5/Elongation factor G/III/ | -59.72222222 | 0.000364128 | 3.14829E-07 |
| Ypt/Rab-GAP domain of gyp1p superfamily p     | -30.34429099 | 0.000112111 | 2.24898E-07 |
| RING/FYVE/PHD zinc finger superfamily prote   | -42.57567105 | 0.003017536 | 1.888E-05   |
| FUS3-complementing gene 2                     | -29.22374429 | 0.003167086 | 5.37439E-06 |
| AAA-type ATPase family protein                | -76.19047619 | 0.000115391 | 7.67359E-08 |
| N/A                                           | -33.51648352 | 2.63621E-10 | 3.09832E-14 |
| N/A                                           | -37.78284363 | 1.26164E-16 | 2.96068E-21 |
| PPPDE putative thiol peptidase family proteir | -80          | 0.001784439 | 2.47849E-06 |
| ubiquitin C-terminal hydrolase 3              | -100         | 0.000703795 | 7.39602E-07 |
| N/A                                           | -30.70265166 | 2.01837E-05 | 2.60873E-08 |
| nicotinate/nicotinamide mononucleotide ade    | -25.20325203 | 5.1489E-05  | 3.30295E-08 |
| N/A                                           | -80          | 0.005242606 | 1.04843E-05 |
| Arabinanase/levansucrase/invertase            | -50          | 0.007912596 | 1.8139E-05  |
| Protein of unknown function (DUF579)          | -50.5952381  | 0.009051124 | 3.17468E-05 |
| kinase interacting (KIP1-like) family protein | -31.68316832 | 2.4918E-14  | 1.14526E-18 |
| kinase interacting (KIP1-like) family protein | -27.43362832 | 3.66749E-07 | 9.84884E-11 |
| kinase interacting (KIP1-like) family protein | -29.14107918 | 2.29193E-11 | 2.0767E-15  |
| kinase interacting (KIP1-like) family protein | -48.60022396 | 8.54617E-09 | 1.45894E-12 |
| kinase interacting (KIP1-like) family protein | -27.95698925 | 0.004582646 | 1.16469E-05 |
| kinase interacting (KIP1-like) family protein | -45.04504505 | 0.005209895 | 1.40285E-05 |
| phytochrome and flowering time regulatory p   | -28.53670886 | 0.000679526 | 6.95363E-07 |
| dihydroflavonol 4-reductase                   | -25.46583851 | 1.48802E-06 | 4.95348E-10 |
| N/A                                           | -48.90510949 | 2.25816E-12 | 1.27512E-16 |
| N/A                                           | -27.05902638 | 5.5189E-08  | 9.47053E-12 |
| Ribosomal protein S21 family protein          | -83.60655738 | 0.000161894 | 1.16705E-07 |
| nuclear RNA polymerase A2                     | -41.88311688 | 0.00866945  | 2.97575E-05 |
| N/A                                           | -50.64935065 | 1.11215E-24 | 8.15585E-30 |
| N/A                                           | -39.77272727 | 4.29438E-10 | 3.96804E-14 |
| N/A                                           | -43.47826087 | 2.04572E-08 | 2.98541E-12 |
| N/A                                           | -35.8974359  | 0.005825239 | 1.21236E-05 |
| non-ATPase subunit 9                          | -88.23529412 | 0.002338548 | 3.63227E-06 |
| Tetratricopeptide repeat (TPR)-like superfam  | -40.54054054 | 0.001884159 | 2.6543E-06  |
| Tetratricopeptide repeat (TPR)-like superfam  | -31.05126269 | 3.89002E-07 | 1.0578E-10  |
| ENTH/VHS/GAT family protein                   | -40.96385542 | 0.000204663 | 1.55191E-07 |
| N/A                                           | -39.57960644 | 0.005639884 | 1.16344E-05 |
| N/A                                           | -29.01234568 | 1.4686E-13  | 5.92341E-18 |
| N/A                                           | -27.63157895 | 7.61226E-05 | 5.34799E-08 |
| RNA 2'-phosphotransferase, Tpt1 / KptA farr   | -36.11111111 | 0.001659154 | 2.25824E-06 |
| Zinc finger protein 622                       | -61.66666667 | 0.005368098 | 1.08927E-05 |



|                                              |              |             |             |
|----------------------------------------------|--------------|-------------|-------------|
| ubiquitin-specific protease 26               | -27.69230769 | 1.07017E-05 | 4.13588E-09 |
| embryo defective 2410                        | -77.64705882 | 0.000691311 | 8.5743E-07  |
| embryo defective 2410                        | -40.54054054 | 0.006637079 | 1.44167E-05 |
| CBS domain-containing protein with a domain  | -60.74766355 | 0.009828008 | 3.61495E-05 |
| ankyrin repeat protein                       | -60.74766355 | 0.009828008 | 3.61495E-05 |
| HXXXD-type acyl-transferase family protein   | -37.93103448 | 0.002590829 | 5.17793E-06 |
| N/A                                          | -32.81509121 | 0.003397932 | 7.57662E-06 |
| N/A                                          | -28.26412138 | 2.96636E-07 | 6.4608E-11  |
| N/A                                          | -26.88172043 | 8.17472E-06 | 3.00942E-09 |
| Exostosin family protein                     | -36.4673913  | 3.48577E-05 | 5.17095E-08 |
| IQ-domain 19                                 | -25.12820513 | 1.26675E-05 | 6.07164E-09 |
| calcium-binding EF hand family protein       | -39.43502825 | 3.04177E-08 | 4.7736E-12  |
| aberrant lateral root formation 4            | -100         | 2.98325E-07 | 6.51947E-11 |
| CTC-interacting domain 7                     | -60          | 0.005553767 | 1.13916E-05 |
| histidine kinase 5                           | -74.3902439  | 0.000319764 | 2.65918E-07 |
| N/A                                          | -52.60869565 | 0.006301595 | 1.87514E-05 |
| TBP-associated factor 5                      | -33.67412828 | 0.000148109 | 1.20002E-07 |
| Chalcone-flavanone isomerase family protein  | -28.35820896 | 0.006488141 | 1.39743E-05 |
| Protein of unknown function (DUF1218)        | -54.65116279 | 3.93644E-10 | 4.78155E-14 |
| Protein of unknown function (DUF1218)        | -62          | 1.25154E-06 | 3.35917E-10 |
| Protein of unknown function (DUF1218)        | -26.78014865 | 0.006430787 | 1.93343E-05 |
| RNA-binding protein 47C                      | -77.5        | 0.006603368 | 1.4286E-05  |
| ADR1-like 1                                  | -35.68438003 | 0.000448077 | 1.39175E-06 |
| Protein phosphatase 2C family protein        | -73.7704918  | 0.000646723 | 6.48445E-07 |
| Erythronate-4-phosphate dehydrogenase fan    | -100         | 0.001933999 | 2.83514E-06 |
| UDP-Glycosyltransferase superfamily protein  | -100         | 0.005353107 | 1.08251E-05 |
| LSD1-like 3                                  | -100         | 1.83775E-06 | 5.21557E-10 |
| 5\'-3\' exoribonuclease 3                    | -70.58823529 | 0.002394843 | 3.74781E-06 |
| N/A                                          | -51.09489051 | 1.13E-11    | 1.24256E-15 |
| RNA polymerase II transcription mediators    | -32.50547345 | 0.000538326 | 6.14665E-07 |
| RNA polymerase II transcription mediators    | -28.15100579 | 0.002276985 | 4.38346E-06 |
| phragmoplast-associated kinesin-related prot | -27.83505155 | 0.000195624 | 1.47619E-07 |
| ferritin 4                                   | -37.33333333 | 4.57306E-06 | 1.79857E-09 |
| ferritin 4                                   | -31.81818182 | 2.15676E-08 | 3.16328E-12 |
| ferritin 4                                   | -30.8083177  | 0.000926295 | 1.06022E-06 |
| Lojap-related protein                        | -31.5362841  | 6.51E-08    | 2.41075E-11 |
| N/A                                          | -73.61111111 | 0.004847211 | 9.36297E-06 |
| N/A                                          | -90.90909091 | 0.00327541  | 5.60865E-06 |
| P-glycoprotein 18                            | -70.41420118 | 0.001984978 | 1.04649E-05 |
| sphere organelles protein-related            | -36.95652174 | 0.005426294 | 1.10705E-05 |
| sphere organelles protein-related            | -60          | 0.007151411 | 1.59483E-05 |
| DNAJ heat shock family protein               | -67.64705882 | 0.005381589 | 1.09359E-05 |
| binding                                      | -25.24312896 | 0.001956084 | 3.55891E-06 |
| SGNH hydrolase-type esterase superfamily pr  | -73.52941176 | 7.77224E-05 | 4.73075E-08 |

|                                                  |              |             |             |
|--------------------------------------------------|--------------|-------------|-------------|
| anthranilate synthase alpha subunit 1            | -33.33333333 | 0.002800712 | 4.56988E-06 |
| translocon at the inner envelope membrane        | -100         | 2.76356E-05 | 1.28935E-08 |
| potassium transporter 1                          | -37.8968254  | 0.000243157 | 1.9169E-07  |
| peptide transporter 1                            | -100         | 0.001933999 | 2.83514E-06 |
| Neutral/alkaline non-lysosomal ceramidase        | -72.22222222 | 0.005009981 | 9.83638E-06 |
| NB-ARC domain-containing disease resistance      | -25.35211268 | 0.004528533 | 3.33725E-05 |
| NB-ARC domain-containing disease resistance      | -25.98690409 | 6.2445E-05  | 4.186E-08   |
| NB-ARC domain-containing disease resistance      | -31.50684932 | 0.002942538 | 4.86309E-06 |
| NB-ARC domain-containing disease resistance      | -47.82608696 | 0.000704473 | 7.41348E-07 |
| NB-ARC domain-containing disease resistance      | -32.46753247 | 0.000811469 | 1.05921E-06 |
| NB-ARC domain-containing disease resistance      | -45.26315789 | 1.04662E-06 | 2.73239E-10 |
| EAP30/Vps36 family protein                       | -26.49350649 | 0.000414166 | 1.25234E-06 |
| glucan synthase-like 7                           | -96.96969697 | 1.61356E-06 | 4.52016E-10 |
| glucan synthase-like 7                           | -46.96969697 | 5.90648E-05 | 3.89364E-08 |
| glucan synthase-like 7                           | -35.84507042 | 9.72511E-05 | 7.24742E-08 |
| N/A                                              | -42.72727273 | 1.70743E-05 | 7.11209E-09 |
| N/A                                              | -31.11111111 | 0.003980985 | 2.78746E-05 |
| N/A                                              | -61.29411765 | 0.00161732  | 2.7323E-06  |
| Major facilitator superfamily protein            | -25.75276445 | 0.00013003  | 2.73192E-07 |
| alpha/beta-Hydrolases superfamily protein        | -33.30827068 | 3.13055E-05 | 1.78005E-08 |
| aminophospholipid ATPase 3                       | -29.48606272 | 0.000713932 | 8.94141E-07 |
| N/A                                              | -32.29376258 | 0.009976212 | 2.47938E-05 |
| eukaryotic translation initiation factor 3G1     | -42.54716981 | 0.003301486 | 2.14128E-05 |
| UB-like protease 1D                              | -85.71428571 | 0.000743599 | 9.41324E-07 |
| Plant protein of unknown function (DUF828)       | -31.05128205 | 0.005967596 | 1.7199E-05  |
| Plant protein of unknown function (DUF828)       | -28.96212525 | 2.82727E-05 | 1.56862E-08 |
| SOUL heme-binding family protein                 | -29.87711214 | 0.000553287 | 6.36309E-07 |
| kinesin like protein for actin based chloroplast | -65.95744681 | 0.000910494 | 1.03814E-06 |
| Xanthine/uracil permease family protein          | -64.86318408 | 1.70E-06    | 1.23044E-09 |
| UDP-Glycosyltransferase superfamily protein      | -44.375      | 2.88148E-05 | 1.60059E-08 |
| UDP-Glycosyltransferase superfamily protein      | -45.19632414 | 0.001732018 | 2.99431E-06 |
| Phototropic-responsive NPH3 family protein       | -47.05882353 | 5.98645E-05 | 3.45062E-08 |
| Signal recognition particle, SRP9/SRP14 subunit  | -26.95926872 | 0.000564005 | 6.52574E-07 |
| Ribosomal protein S8e family protein             | -30.30450908 | 2.5857E-06  | 9.23572E-10 |
| Nuclear transport factor 2 (NTF2) family protein | -27.87787788 | 0.007337824 | 1.64985E-05 |
| F-box family protein                             | -35.89256647 | 0.001854191 | 3.29462E-06 |
| GPI transamidase component PIG-S-related         | -33.00970874 | 9.77754E-06 | 4.42326E-09 |
| GPI transamidase component PIG-S-related         | -43.24324324 | 7.15679E-05 | 4.94342E-08 |
| GPI transamidase component PIG-S-related         | -33.05785124 | 6.33332E-07 | 1.56055E-10 |
| dolichol-phosphate mannosyltransferase-related   | -32.00147984 | 0.007322684 | 1.6443E-05  |
| N/A                                              | -78.84615385 | 0.002157919 | 3.2805E-06  |
| Protein kinase superfamily protein               | -41.29554656 | 3.39505E-07 | 8.96119E-11 |
| plant U-box 13                                   | -30.6122449  | 0.003545459 | 6.21927E-06 |
| N/A                                              | -27.38828968 | 0.000107531 | 6.9867E-08  |

|                                               |              |             |             |
|-----------------------------------------------|--------------|-------------|-------------|
| DIE2/ALG10 family                             | -31.99974395 | 3.03E-08    | 9.96807E-12 |
| AAA-type ATPase family protein                | -36.02614124 | 1.81671E-22 | 1.78575E-27 |
| Protein of unknown function (DUF674)          | -27.43902439 | 1.72039E-10 | 1.9316E-14  |
| Protein of unknown function (DUF674)          | -27.20462329 | 0.004434307 | 8.30525E-06 |
| Yippee family putative zinc-binding protein   | -26.32010354 | 1.46832E-06 | 4.85008E-10 |
| Yippee family putative zinc-binding protein   | -32.59504132 | 6.45494E-06 | 2.28163E-09 |
| Protein of unknown function (DUF567)          | -50.84745763 | 1.00554E-09 | 1.04438E-13 |
| nuclear shuttle interacting                   | -32.73167358 | 0.000386208 | 1.14054E-06 |
| Phosphoglycerate mutase, 2,3-bisphosphogly    | -70.59961315 | 0.000703795 | 7.33411E-07 |
| Serine/threonine-protein kinase Rio1          | -56.25       | 0.001627191 | 2.20161E-06 |
| Protein kinase superfamily protein            | -72.22222222 | 0.008546843 | 2.02511E-05 |
| binding                                       | -100         | 0.0002397   | 1.88262E-07 |
| Uncharacterized protein family (UPF0016)      | -25.69007264 | 0.001114632 | 1.65253E-06 |
| Uncharacterized protein family (UPF0016)      | -40.87265231 | 4.77489E-07 | 1.34262E-10 |
| ATPase, V1 complex, subunit B protein         | -90          | 0.00295471  | 4.89482E-06 |
| Protein kinase superfamily protein            | -97.14285714 | 1.92469E-07 | 4.00852E-11 |
| Pentatricopeptide repeat (PPR-like) superfam  | -38.8185654  | 0.009486365 | 2.32324E-05 |
| ARABIDILLO-1                                  | -47.61904762 | 0.006746728 | 1.47391E-05 |
| N/A                                           | -29.56567242 | 0.008817792 | 3.04768E-05 |
| little nuclei1                                | -32.72727273 | 0.009894751 | 2.45405E-05 |
| mitogen-activated protein kinase phosphatas   | -27.03801945 | 0.001768776 | 2.44766E-06 |
| RNA-binding (RRM/RBD/RNP motifs) family p     | -100         | 0.001933999 | 2.83514E-06 |
| HEAT repeat-containing protein                | -25.81578416 | 1.59077E-05 | 7.85449E-09 |
| HEAT repeat-containing protein                | -100         | 0.001933999 | 2.83514E-06 |
| Major facilitator superfamily protein         | -30.85585586 | 6.60E-07    | 3.8869E-10  |
| REF4-related 1                                | -92.30769231 | 0.001904087 | 2.69215E-06 |
| RNA-binding (RRM/RBD/RNP motifs) family p     | -70          | 0.009734505 | 3.56521E-05 |
| Pectin lyase-like superfamily protein         | -26.5445801  | 4.25E-13    | 2.89179E-17 |
| NHL domain-containing protein                 | -27.84008046 | 0.000534963 | 1.76322E-06 |
| BAH domain ;TFIIS helical bundle-like domain  | -75          | 0.004932456 | 9.64338E-06 |
| Heavy metal transport/detoxification superfa  | -53.94957983 | 0.000598497 | 5.87251E-07 |
| SIN3-like 2                                   | -80.55555556 | 0.000823006 | 9.16783E-07 |
| Pentatricopeptide repeat (PPR) superfamily p  | -41.57608696 | 2.43309E-06 | 7.31558E-10 |
| HVA22-like protein K                          | -33.95983936 | 0.000330978 | 3.3445E-07  |
| biotin carboxyl carrier protein 2             | -96.66666667 | 1.38812E-06 | 3.82756E-10 |
| PHD finger family protein                     | -47.10144928 | 0.001437431 | 1.87529E-06 |
| N/A                                           | -27.91255665 | 0.003708649 | 8.56653E-06 |
| cell division protein ftsH, putative          | -63.69047619 | 0.00010836  | 7.05647E-08 |
| Proline-rich spliceosome-associated (PSP) fan | -77.35849057 | 1.78787E-08 | 2.54358E-12 |
| RAB GTPase homolog A1D                        | -29.44175971 | 1.2481E-13  | 7.04763E-18 |
| RAB GTPase homolog A1D                        | -50.79772995 | 7.78881E-31 | 3.06843E-36 |
| RAB GTPase homolog A1D                        | -65.38835324 | 1.89176E-41 | 2.77461E-47 |
| RAB GTPase homolog A1D                        | -47.23415682 | 6.7166E-12  | 5.46845E-16 |
| golgin candidate 6                            | -34.92747253 | 0.000472038 | 5.2224E-07  |

|                                                 |              |             |             |
|-------------------------------------------------|--------------|-------------|-------------|
| auxin response factor 8                         | -60          | 0.005453457 | 1.50174E-05 |
| CLIP-associated protein                         | -28.84615385 | 0.006424062 | 1.92998E-05 |
| CLIP-associated protein                         | -28.35820896 | 2.47181E-05 | 1.34219E-08 |
| peptide deformylase 1B                          | -25.47172588 | 0.000939253 | 1.29076E-06 |
| SET domain group 29                             | -39.84848485 | 3.34188E-05 | 1.9237E-08  |
| TLC ATP/ADP transporter                         | -34.98217469 | 0.006817451 | 2.10116E-05 |
| Cytochrome C1 family                            | -79.41176471 | 0.000523011 | 4.93239E-07 |
| Mitochondrial ribosomal protein L37             | -47.36842105 | 0.001735936 | 2.38948E-06 |
| Ribonuclease inhibitor                          | -100         | 0.000440203 | 4.00618E-07 |
| DEAD-box protein abstrakt, putative             | -90          | 0.005869408 | 1.22371E-05 |
| ARM repeat superfamily protein                  | -83.33333333 | 0.000240795 | 1.89475E-07 |
| N/A                                             | -41.93548387 | 0.000308141 | 2.5444E-07  |
| N/A                                             | -80.95238095 | 7.73161E-05 | 4.70035E-08 |
| MALE GAMETOPHYTE DEFECTIVE 2                    | -34.54829471 | 0.001051588 | 1.51487E-06 |
| Protein of unknown function (DUF3754)           | -53.04347826 | 0.004918235 | 1.29396E-05 |
| Peptidase M50 family protein                    | -76.31578947 | 5.29223E-05 | 2.92629E-08 |
| Core-2/I-branching beta-1,6-N-acetylglucosar    | -29.57844251 | 2.22E-07    | 1.06075E-10 |
| Cyclin/Brf1-like TBP-binding protein            | -43.61702128 | 0.00284178  | 4.65641E-06 |
| DHHC-type zinc finger family protein            | -57.89473684 | 4.30994E-10 | 5.29183E-14 |
| DHHC-type zinc finger family protein            | -35.95505618 | 5.17298E-07 | 1.47749E-10 |
| alpha-L-arabinofuranosidase 1                   | -54.54545455 | 0.004932584 | 3.76482E-05 |
| mitochondrial RNAediting factor 1               | -32.75862069 | 0.000649383 | 6.53373E-07 |
| spindle pole body component 98                  | -70.14925373 | 0.005368098 | 1.08852E-05 |
| receptor-like kinase in in flowers 3            | -25.3968254  | 0.00909331  | 2.19393E-05 |
| N/A                                             | -70.83333333 | 3.35904E-08 | 5.51784E-12 |
| N/A                                             | -30.76443155 | 1.96E-08    | 6.07591E-12 |
| myosin 2                                        | -77.08333333 | 0.003785477 | 6.75967E-06 |
| Lipin family protein                            | -100         | 3.68175E-05 | 1.83059E-08 |
| endomembrane-type CA-ATPase 4                   | -60.86956522 | 0.006922846 | 1.52339E-05 |
| N/A                                             | -84.61538462 | 0.008526819 | 2.01911E-05 |
| P-loop containing nucleoside triphosphate hy    | -44          | 0.009296876 | 2.26282E-05 |
| Ribosomal protein L13 family protein            | -76.47058824 | 0.003960437 | 7.17084E-06 |
| Nucleotide-diphospho-sugar transferases sup     | -44.68085106 | 0.000833382 | 9.32619E-07 |
| ACT-like superfamily protein                    | -59.3220339  | 5.08666E-05 | 2.7865E-08  |
| alpha carbonic anhydrase 7                      | -31.89840723 | 2.26E-06    | 1.7561E-09  |
| N/A                                             | -26.54462243 | 0.001496817 | 1.97911E-06 |
| UDP-glucosyl transferase 73C2                   | -26.54462243 | 0.001496817 | 1.97911E-06 |
| Duplicated homeodomain-like superfamily pr      | -35.32163743 | 0.001012789 | 4.14977E-06 |
| peroxin 6                                       | -86.36363636 | 2.43736E-05 | 1.1082E-08  |
| NAD+ transporter 1                              | -100         | 0.000796198 | 8.74075E-07 |
| WRKY DNA-binding protein 35                     | -100         | 2.29387E-06 | 6.79605E-10 |
| N/A                                             | -100         | 0.000703795 | 7.39602E-07 |
| Translation initiation factor 2, small GTP-bind | -53.22580645 | 7.40109E-07 | 4.51417E-10 |
| Protein kinase superfamily protein              | -31.05413105 | 5.34E-06    | 5.07192E-09 |

|                                                 |              |             |             |
|-------------------------------------------------|--------------|-------------|-------------|
| Polynucleotidyl transferase, ribonuclease H-li  | -30.06993007 | 1.67E-06    | 1.2086E-09  |
| DHHC-type zinc finger family protein            | -65.51724138 | 0.000944887 | 1.0865E-06  |
| DNAJ heat shock N-terminal domain-containi      | -55.31914894 | 0.000799921 | 8.79922E-07 |
| plant glycogenin-like starch initiation protein | -78.26086957 | 0.003349409 | 7.41565E-06 |
| transcription activators                        | -50          | 0.000554647 | 5.3487E-07  |
| MuDR family transposase                         | -47.5        | 0.007842648 | 1.79097E-05 |
| MuDR family transposase                         | -25.04862462 | 0.004100339 | 9.88589E-06 |
| PIN domain-like family protein                  | -60          | 0.000877666 | 3.41605E-06 |
| N/A                                             | -60          | 0.000877666 | 3.41605E-06 |
| N/A                                             | -46.68067227 | 1.43E-14    | 6.62673E-19 |
| zinc knuckle (CCHC-type) family protein         | -51.73745174 | 0.008498885 | 2.00536E-05 |
| RNA-binding (RRM/RBD/RNP motifs) family p       | -76.38888889 | 9.28656E-05 | 5.84316E-08 |
| P-loop containing nucleoside triphosphate hy    | -53.64238411 | 4.0498E-10  | 4.94583E-14 |
| N/AMETHYLATED_REGION                            | -36.36875123 | 4.02E-16    | 1.22356E-20 |
| extra-large G-protein 1                         | -80.64516129 | 0.003261074 | 7.14299E-06 |
| N/A                                             | -45.92397275 | 2.58549E-05 | 3.57413E-08 |
| FORMS APLOID AND BINUCLEATE CELLS 1C            | -97.14285714 | 9.21935E-06 | 3.44807E-09 |
| O-fucosyltransferase family protein             | -49.50146628 | 0.000945072 | 1.08741E-06 |
| DNAJ heat shock N-terminal domain-containi      | -30.96660031 | 4.35097E-05 | 6.81901E-08 |
| purin-rich alpha 1                              | -85.71428571 | 0.001933999 | 2.82117E-06 |
| Plant protein of unknown function (DUF863)      | -100         | 0.000796198 | 8.74075E-07 |
| N/A                                             | -37.23076923 | 0.000261045 | 6.79967E-07 |
| N/A                                             | -33.03240741 | 7.86E-09    | 2.12228E-12 |
| EXS (ERD1/XPR1/SYG1) family protein             | -36.84210526 | 5.11057E-05 | 3.26159E-08 |
| Got1/Sft2-like vesicle transport protein fami   | -96.2962963  | 5.60705E-05 | 3.15792E-08 |
| zinc ion binding;nucleic acid binding           | -75.71428571 | 0.002789447 | 5.73815E-06 |
| RINT-1 / TIP-1 family                           | -66.9924812  | 0.000512793 | 4.81722E-07 |
| hAT dimerisation domain-containing protein      | -66.9924812  | 0.000512793 | 4.81722E-07 |
| chitin elicitor receptor kinase 1               | -100         | 0.000440203 | 4.00618E-07 |
| N/A                                             | -85.8974359  | 1.23273E-05 | 4.93644E-09 |
| N/A                                             | -50.79113924 | 0.004912718 | 1.29135E-05 |
| ortholog of human splicing factor SC35          | -50.79113924 | 0.004912718 | 1.29135E-05 |
| N/A                                             | -28.24899026 | 0.004622879 | 8.76014E-06 |
| N/A                                             | -27.74864025 | 0.001834553 | 3.24625E-06 |
| GRAM domain family protein                      | -45.20833333 | 6.07347E-08 | 1.28406E-11 |
| ubiquitin-specific protease 13                  | -25.31282051 | 4.60196E-14 | 2.2662E-18  |
| BLISTER                                         | -67.59259259 | 0.002982454 | 4.95609E-06 |
| N/A                                             | -67.59259259 | 0.002982454 | 4.95609E-06 |
| TRAF-like superfamily protein                   | -48.88888889 | 0.003702328 | 6.57318E-06 |
| pentatricopeptide (PPR) repeat-containing pr    | -37.77777778 | 0.002427585 | 1.38818E-05 |
| thioredoxin X                                   | -42.29607251 | 2.26154E-05 | 3.01146E-08 |
| N/A                                             | -42.29607251 | 2.26154E-05 | 3.01146E-08 |
| Arabidopsis phospholipase-like protein (PEAF    | -90.90909091 | 0.004921546 | 9.61483E-06 |
| ARM repeat superfamily protein                  | -36.36363636 | 0.00635582  | 1.35821E-05 |

|                                                          |              |             |             |
|----------------------------------------------------------|--------------|-------------|-------------|
| N/A                                                      | -44.44444444 | 0.007447034 | 1.67823E-05 |
| MBOAT (membrane bound O-acyl transferase)                | -65.54487179 | 0.005068597 | 9.99132E-06 |
| Metallo-hydrolase/oxidoreductase superfamily             | -51.25       | 0.008757372 | 8.6617E-05  |
| N/A                                                      | -25.24959368 | 0.007733475 | 1.75809E-05 |
| Homeodomain-like protein with RING/FYVE/IBR              | -40.8445577  | 0.001017712 | 1.19114E-06 |
| transducin family protein / WD-40 repeat family          | -72.22222222 | 0.008968817 | 2.15798E-05 |
| F-box family protein                                     | -44.54545455 | 4.18748E-05 | 2.54599E-08 |
| cysteine-rich RLK (RECEPTOR-like protein kinase)         | -26.35332435 | 0.000255436 | 6.59259E-07 |
| N/A                                                      | -80.90909091 | 0.000144904 | 1.01057E-07 |
| Tesmin/TSO1-like CXC domain-containing protein           | -55.88235294 | 4.67456E-06 | 1.56567E-09 |
| Kinase interacting (KIP1-like) family protein            | -31.05010661 | 0.002393079 | 3.74329E-06 |
| phosphoglucomutase                                       | -63.15789474 | 0.002793865 | 4.55665E-06 |
| 2-oxoglutarate (2OG) and Fe(II)-dependent oxidoreductase | -25.32440019 | 0.000463193 | 4.24259E-07 |
| N/A                                                      | -34.82772935 | 0.000979829 | 1.13459E-06 |
| Regulator of chromosome condensation (RCC1)              | -42.57164404 | 0.00047655  | 4.39637E-07 |
| Pyridoxal phosphate (PLP)-dependent transaminase         | -36.42089094 | 2.75723E-08 | 4.22596E-12 |
| FORMS APLOID AND BINUCLEATE CELLS 1A                     | -100         | 2.64011E-11 | 1.98005E-15 |
| serine carboxypeptidase-like 27                          | -40.60606061 | 0.00046218  | 1.45194E-06 |
| N/A                                                      | -33.15942029 | 0.000359561 | 1.03683E-06 |
| Transmembrane Fragile-X-F-associated protein 1           | -32.96296296 | 1.66982E-08 | 3.01506E-12 |
| Transmembrane Fragile-X-F-associated protein 2           | -54.05128205 | 1.72039E-10 | 1.92407E-14 |
| Transmembrane Fragile-X-F-associated protein 3           | -38.41269841 | 0.000454697 | 4.97332E-07 |
| Transmembrane Fragile-X-F-associated protein 4           | -72.16117216 | 5.42254E-09 | 6.87946E-13 |
| Transmembrane Fragile-X-F-associated protein 5           | -40.47619048 | 4.92908E-05 | 2.65406E-08 |
| NAC (No Apical Meristem) domain transcript 1             | -59.28853755 | 0.009486365 | 2.32425E-05 |
| N/A                                                      | -68.75       | 0.000620945 | 6.15197E-07 |
| mRNA splicing factor, thioredoxin-like U5 snRNP          | -96.15384615 | 1.03113E-09 | 1.08889E-13 |
| phosphofructokinase 4                                    | -60.81081081 | 3.20131E-08 | 5.14321E-12 |
| N/A                                                      | -25.0113413  | 4.94954E-05 | 8.0688E-08  |
| N/A                                                      | -62.16216216 | 0.004306119 | 1.06223E-05 |
| N/A                                                      | -32.76315789 | 1.47339E-05 | 6.03996E-09 |
| UBX domain-containing protein                            | -51.85185185 | 0.009192263 | 2.2259E-05  |
| RING/FYVE/PHD zinc finger superfamily protein            | -84.14634146 | 2.40672E-05 | 1.08897E-08 |
| Eukaryotic aspartyl protease family protein              | -100         | 0.000703795 | 7.39602E-07 |
| MIRO-related GTP-ase 1                                   | -93.33333333 | 0.002195562 | 3.36519E-06 |
| P-loop containing nucleoside triphosphate hydrolase      | -33.60215892 | 2.33E-11    | 2.9228E-15  |
| Chalcone-flavanone isomerase family protein              | -66.00498487 | 1.13E-13    | 6.43181E-18 |
| PRLI-interacting factor, putative                        | -62.05741627 | 2.55693E-17 | 5.4378E-22  |
| lipase class 3 family protein                            | -30.12350265 | 0.004310897 | 1.06458E-05 |
| BRI1 suppressor 1 (BSU1)-like 2                          | -82.8125     | 1.12951E-07 | 2.13706E-11 |
| Protein of unknown function (DUF2296)                    | -28.30572508 | 0.002165398 | 4.07765E-06 |
| N/A                                                      | -51.05359217 | 4.84E-44    | 3.54937E-50 |
| Carbohydrate-binding-like fold                           | -36.07769424 | 1.79E-07    | 8.21974E-11 |
| exocyst subunit exo70 family protein A1                  | -100         | 0.000440203 | 4.00618E-07 |

|                                                |              |             |             |
|------------------------------------------------|--------------|-------------|-------------|
| uricase / urate oxidase / nodulin 35, putative | -52.93040293 | 0.001240448 | 1.53019E-06 |
| uricase / urate oxidase / nodulin 35, putative | -42.5990676  | 3.99E-07    | 2.1117E-10  |
| nuclear RNA polymerase C1                      | -44.42724458 | 0.004503487 | 8.47115E-06 |
| N/A                                            | -72.91157441 | 7.19E-22    | 6.94041E-27 |
| N/A                                            | -83.33333333 | 2.14878E-12 | 1.1976E-16  |
| GroES-like zinc-binding dehydrogenase family   | -80.95238095 | 0.003422193 | 2.25694E-05 |

---

## Supplemental Table

---

### GO term

GO:0005524  
GO:0016772  
GO:0001882  
GO:0000166  
GO:0016740  
GO:0016773  
GO:0004672  
GO:0016790  
GO:0004518  
GO:0004221  
GO:0003824  
GO:0016462  
GO:0004386  
GO:0016817  
GO:0005488  
GO:0016887

---



## 10: Gene ontology enrichment analysis of the differentially hyper-methy

---

### Description

ATP binding  
transferase activity, transferring phosphorus-containing groups  
nucleoside binding  
nucleotide binding  
transferase activity  
phosphotransferase activity, alcohol group as acceptor  
protein kinase activity  
thiolester hydrolase activity  
nuclease activity  
ubiquitin thiolesterase activity  
catalytic activity  
pyrophosphatase activity  
helicase activity  
hydrolase activity, acting on acid anhydrides  
binding  
ATPase activity

---

lated genes.

---

| Number in input list | Number in genome | %     |
|----------------------|------------------|-------|
| 85                   | 3990             | 7.35  |
| 66                   | 2985             | 5.71  |
| 94                   | 4747             | 8.13  |
| 105                  | 5459             | 9.08  |
| 96                   | 4916             | 8.30  |
| 57                   | 2624             | 4.93  |
| 52                   | 2394             | 4.50  |
| 6                    | 87               | 0.52  |
| 8                    | 164              | 0.69  |
| 5                    | 69               | 0.43  |
| 224                  | 13905            | 19.38 |
| 30                   | 1440             | 2.60  |
| 16                   | 668              | 1.38  |
| 30                   | 1480             | 2.60  |
| 268                  | 17591            | 23.18 |
| 14                   | 581              | 1.21  |

---

---

***P*-value**

9.50E-05  
0.00025  
0.00048  
0.00058  
0.00066  
0.001  
0.0017  
0.002  
0.003  
0.0038  
0.0058  
0.026  
0.033  
0.035  
0.04  
0.042

---

**Supplemental Table 11: Gene ontology enrichment analysis of the differer**

| <b>GO term</b> | <b>Description</b>                            |
|----------------|-----------------------------------------------|
| GO:0016817     | hydrolase activity, acting on acid anhydrides |
| GO:0016462     | pyrophosphatase activity                      |
| GO:0017111     | nucleoside-triphosphatase activity            |
| GO:0000166     | nucleotide binding                            |
| GO:0003723     | RNA binding                                   |
| GO:0034062     | RNA polymerase activity                       |
| GO:0005524     | ATP binding                                   |
| GO:0003899     | DNA-directed RNA polymerase activity          |
| GO:0005488     | binding                                       |
| GO:0035091     | phosphoinositide binding                      |
| GO:0003843     | 1,3-beta-glucan synthase activity             |
| GO:0016887     | ATPase activity                               |
| GO:0016787     | hydrolase activity                            |
| GO:0005515     | protein binding                               |
| GO:0008017     | microtubule binding                           |
| GO:0016779     | nucleotidyltransferase activity               |
| GO:0004386     | helicase activity                             |
| GO:0008026     | ATP-dependent helicase activity               |
| GO:0008092     | cytoskeletal protein binding                  |
| GO:0042623     | ATPase activity, coupled                      |
| GO:0005543     | phospholipid binding                          |
| GO:0060589     | nucleoside-triphosphatase regulator activity  |
| GO:0008047     | enzyme activator activity                     |
| GO:0003777     | microtubule motor activity                    |
| GO:0016853     | isomerase activity                            |
| GO:0004518     | nuclease activity                             |
| GO:0005083     | small GTPase regulator activity               |
| GO:0003676     | nucleic acid binding                          |
| GO:0008289     | lipid binding                                 |
| GO:0016866     | intramolecular transferase activity           |
| GO:0005525     | GTP binding                                   |
| GO:0032561     | guanyl ribonucleotide binding                 |
| GO:0008194     | UDP-glycosyltransferase activity              |
| GO:0043531     | ADP binding                                   |
| GO:0019001     | guanyl nucleotide binding                     |
| GO:0009378     | four-way junction helicase activity           |
| GO:0004221     | ubiquitin thiolesterase activity              |
| GO:0003924     | GTPase activity                               |

**ntially hypo-methylated genes.**

| <b>Number in input list</b> | <b>Number in genome</b> | <b><i>P</i>-value</b> | <b>%</b> |
|-----------------------------|-------------------------|-----------------------|----------|
| 72                          | 1480                    | 1.70E-06              | 3.71     |
| 70                          | 1440                    | 2.50E-06              | 3.61     |
| 69                          | 1412                    | 2.50E-06              | 3.55     |
| 198                         | 5459                    | 3.70E-06              | 10.20    |
| 30                          | 486                     | 4.30E-05              | 1.55     |
| 12                          | 105                     | 5.70E-05              | 0.62     |
| 145                         | 3990                    | 0.0001                | 7.47     |
| 11                          | 98                      | 0.00013               | 0.57     |
| 519                         | 17591                   | 0.00026               | 26.74    |
| 5                           | 18                      | 0.00027               | 0.26     |
| 5                           | 23                      | 0.00071               | 0.26     |
| 29                          | 581                     | 0.0015                | 1.49     |
| 153                         | 4588                    | 0.0025                | 7.88     |
| 201                         | 6255                    | 0.0026                | 10.36    |
| 13                          | 189                     | 0.0026                | 0.67     |
| 15                          | 238                     | 0.0028                | 0.77     |
| 31                          | 668                     | 0.0031                | 1.60     |
| 13                          | 205                     | 0.0049                | 0.67     |
| 14                          | 238                     | 0.0067                | 0.72     |
| 18                          | 343                     | 0.007                 | 0.93     |
| 9                           | 121                     | 0.0071                | 0.46     |
| 10                          | 154                     | 0.011                 | 0.52     |
| 7                           | 87                      | 0.011                 | 0.36     |
| 10                          | 155                     | 0.012                 | 0.52     |
| 13                          | 238                     | 0.015                 | 0.67     |
| 10                          | 164                     | 0.016                 | 0.52     |
| 9                           | 142                     | 0.018                 | 0.46     |
| 127                         | 3997                    | 0.024                 | 6.54     |
| 9                           | 153                     | 0.026                 | 0.46     |
| 5                           | 59                      | 0.026                 | 0.26     |
| 19                          | 431                     | 0.028                 | 0.98     |
| 19                          | 431                     | 0.028                 | 0.98     |
| 10                          | 180                     | 0.028                 | 0.52     |
| 20                          | 467                     | 0.032                 | 1.03     |
| 19                          | 442                     | 0.034                 | 0.98     |
| 6                           | 91                      | 0.041                 | 0.31     |
| 5                           | 69                      | 0.044                 | 0.26     |
| 11                          | 228                     | 0.05                  | 0.57     |

**Supplemental Table 12: List of 93 syncytium-differentially hyper-methylated genes.**

| Gene ID         | Annotation                                              | P value     |
|-----------------|---------------------------------------------------------|-------------|
| Glyma.01G157600 | -                                                       | 1.21106E-05 |
| Glyma.02G014200 | CTP synthase family protein                             | 1.54644E-06 |
| Glyma.02G078600 | NAD(P)-binding Rossmann-fold superfamily protein        | 2.31518E-05 |
| Glyma.02G095000 | ribosomal protein L23AB                                 | 2.85434E-08 |
| Glyma.02G141500 | DREB2A-interacting protein 2                            | -           |
| Glyma.02G165800 | Protein kinase superfamily protein                      | -           |
| Glyma.02G211800 | auxin F-box protein 5                                   | 2.83514E-06 |
| Glyma.02G259000 | Aldolase-type TIM barrel family protein                 | -           |
| Glyma.03G008100 | cytochrome P450, family 86, subfamily A, polypeptide 8  | -           |
| Glyma.03G013000 | RNAhelicase-like 8                                      | 2.80843E-11 |
| Glyma.03G140100 | NIMA-related kinase 5                                   | 2.00027E-08 |
| Glyma.03G219500 | Prolyl oligopeptidase family protein                    | 2.83514E-06 |
| Glyma.04G014400 | switch subunit 3                                        | 3.45642E-06 |
| Glyma.04G057200 | CTC-interacting domain 7                                | 8.99497E-10 |
| Glyma.04G132900 | Ribosomal protein S19e family protein                   | 7.39602E-07 |
| Glyma.04G221900 | ribonuclease II family protein                          | 2.01037E-05 |
| Glyma.04G236900 | NADH-dependent glutamate synthase 1                     | 4.70062E-06 |
| Glyma.05G044200 | MA3 domain-containing protein                           | -           |
| Glyma.05G046400 | homolog of nucleolar protein NOP56                      | 3.77185E-08 |
| Glyma.05G105000 | Phototropic-responsive NPH3 family protein              | 2.32405E-05 |
| Glyma.05G117000 | Calmodulin-binding transcription activator protein with | 2.18258E-14 |
| Glyma.05G223100 | Mitochondrial ATP synthase subunit G protein            | 2.01911E-05 |
| Glyma.06G046000 | autoinhibited Ca <sup>2+</sup> -ATPase 1                | 8.98773E-06 |
| Glyma.06G061600 | nuclear RNA polymerase D2A                              | -           |
| Glyma.06G140200 | alpha/beta-Hydrolases superfamily protein               | 1.24253E-05 |
| Glyma.06G141300 | -                                                       | 4.29594E-08 |
| Glyma.06G214100 | -                                                       | 1.18536E-07 |
| Glyma.06G216700 | nudix hydrolase homolog 19                              | 7.20284E-06 |
| Glyma.06G322700 | SNARE-like superfamily protein                          | 5.88812E-06 |
| Glyma.07G059900 | ribosomal protein L5 B                                  | 2.83514E-06 |
| Glyma.07G099000 | -                                                       | -           |
| Glyma.07G256500 | CBS domain-containing protein with a domain of unkn     | 9.82772E-06 |
| Glyma.08G096300 | Transketolase family protein                            | 4.94387E-06 |
| Glyma.08G109400 | Chalcone and stilbene synthase family protein           | 2.03258E-07 |
| Glyma.08G138800 | aspartate aminotransferase                              | 2.15798E-05 |
| Glyma.08G209300 | -                                                       | -           |
| Glyma.09G023300 | Intron maturase, type II family protein                 | 5.5233E-08  |
| Glyma.09G155200 | ATP-dependent Clp protease                              | 3.84506E-07 |

|                 |                                                         |             |
|-----------------|---------------------------------------------------------|-------------|
| Glyma.09G182600 | zinc finger protein-related                             | 8.68221E-08 |
| Glyma.09G217700 | -                                                       | 1.94654E-09 |
| Glyma.10G058500 | chloroplast RNA-binding protein 29                      | 4.67291E-07 |
| Glyma.10G106500 | INO80 ortholog                                          | 1.86949E-07 |
| Glyma.10G104900 | ARM repeat superfamily protein                          | -           |
| Glyma.10G124700 | peroxisomal 3-ketoacyl-CoA thiolase 3                   | -           |
| Glyma.10G188600 | TRAF-like superfamily protein                           | -           |
| Glyma.10G205500 | phosphoenolpyruvate carboxylase 4                       | 1.84582E-05 |
| Glyma.11G135300 | Tetratricopeptide repeat (TPR)-like superfamily protein | 9.51905E-06 |
| Glyma.11G158400 | AICARFT/IMPCHase bienzyme family protein                | -           |
| Glyma.11G218000 | DegP protease 7                                         | 1.76856E-07 |
| Glyma.11G234200 | -                                                       | 4.51724E-06 |
| Glyma.12G052800 | cell division cycle protein 48-related / CDC48-related  | 7.62613E-09 |
| Glyma.12G107000 | NAD(P)H dehydrogenase B1                                | 1.28935E-08 |
| Glyma.12G154900 | -                                                       | -           |
| Glyma.12G174700 | Nucleotide/sugar transporter family protein             | -           |
| Glyma.13G139100 | Transducin/WD40 repeat-like superfamily protein         | 6.75522E-10 |
| Glyma.13G207200 | NAD(P)-binding Rossmann-fold superfamily protein        | 2.31716E-05 |
| Glyma.13G336200 | triosephosphate isomerase                               | 1.83649E-05 |
| Glyma.14G097800 | S-adenosyl-L-methionine-dependent methyltransferase     | 2.08206E-05 |
| Glyma.15G009500 | Lactoylglutathione lyase / glyoxalase I family protein  | -           |
| Glyma.15G046400 | Phosphatidylinositol-4-phosphate 5-kinase family prote  | -           |
| Glyma.15G091000 | auxin response factor 8                                 | 3.21845E-06 |
| Glyma.15G115500 | Inositol monophosphatase family protein                 | 9.60573E-09 |
| Glyma.15G134800 | Ribosomal protein L12/ ATP-dependent Clp protease ad    | 7.66995E-08 |
| Glyma.15G177000 | Mob1/phocein family protein                             | 2.06864E-05 |
| Glyma.15G275000 | Cellulose synthase family protein                       | 3.34038E-06 |
| Glyma.16G036900 | Ribosomal protein L25/Gln-tRNA synthetase, anti-codor   | -           |
| Glyma.16G082400 | Sec23/Sec24 protein transport family protein            | 2.83514E-06 |
| Glyma.16G092500 | -                                                       | 2.83514E-06 |
| Glyma.16G144000 | Protein kinase superfamily protein                      | 1.31234E-06 |
| Glyma.16G195300 | F-box/RNI-like superfamily protein                      | 8.01981E-06 |
| Glyma.17G011500 | Saposin-like aspartyl protease family protein           | 7.66995E-08 |
| Glyma.17G030800 | -                                                       | -           |
| Glyma.17G031900 | calmodulin binding;transcription regulators             | 8.65029E-10 |
| Glyma.17G104100 | dicer-like 4                                            | -           |
| Glyma.17G146400 | Plant VAMP (vesicle-associated membrane protein) fam    | 1.76844E-06 |
| Glyma.17G157100 | -                                                       | 6.86935E-18 |
| Glyma.18G044200 | Homeodomain-like superfamily protein                    | 9.47969E-08 |
| Glyma.18G047900 | nodulin MtN21 /EamA-like transporter family protein     | 3.97809E-06 |
| Glyma.18G085200 | beta-1,2-xylosyltransferase                             | 6.86686E-08 |

|                 |                                                          |             |
|-----------------|----------------------------------------------------------|-------------|
| Glyma.19G053500 | NAD-dependent glycerol-3-phosphate dehydrogenase f       | 1.0201E-05  |
| Glyma.19G064200 | -                                                        | -           |
| Glyma.19G242300 | O-acetylserine (thiol) lyase (OAS-TL) isoform A1         | -           |
| Glyma.20G126800 | Cyclase family protein                                   | 3.26481E-09 |
| Glyma.20G168100 | ribosomal protein 1                                      | -           |
| Glyma.20G179900 | phosphoglucosamine mutase family protein                 | -           |
| Glyma.01G168900 | DNA binding;zinc ion binding;nucleic acid binding;nuclei | 1.12889E-08 |
| Glyma.01G245100 | histone deacetylase 1                                    | 4.42884E-09 |
| Glyma.06G286700 | O-methyltransferase family protein                       | 1.05951E-10 |
| Glyma.07G157400 | SU(VAR)3-9 homolog 9                                     | 1.96873E-05 |
| Glyma.10G104300 | SERINE CARBOXYPEPTIDASE-LIKE 49                          | 6.20201E-14 |
| Glyma.13G073900 | protein kinase 2A                                        | 1.01758E-05 |
| Glyma.19G239700 | DNAJ heat shock N-terminal domain-containing protein     | 7.4782E-07  |
| Glyma.20G130800 | Homeodomain-like protein with RING/FYVE/PHD-type z       | 1.43753E-05 |



| CpG Context |                        |                             | CHG C      |            |
|-------------|------------------------|-----------------------------|------------|------------|
| q value     | Methylation Difference | Region                      | P value    | q value    |
| 0.005823103 | 46.2962963             | GENE BODY                   | -          | -          |
| 0.001240448 | 100                    | GENE BODY                   | -          | -          |
| 0.009463526 | 50                     | GENE BODY                   | -          | -          |
| 5.18275E-05 | 90                     | PROMOTER                    | -          | -          |
| -           | -                      | -                           | -          | -          |
| -           | -                      | -                           | 3.6583E-07 | 0.00035602 |
| 0.001933999 | 100                    | GENE BODY                   | -          | -          |
| -           | -                      | -                           | -          | -          |
| -           | -                      | -                           | 5.0732E-06 | 0.00255424 |
| 1.41839E-07 | 100                    | GENE BODY                   | -          | -          |
| 3.94734E-05 | 55.3030303             | GENE BODY                   | -          | -          |
| 0.001933999 | 100                    | GENE BODY                   | -          | -          |
| 0.002243341 | 41.61573213            | GENE BODY                   | -          | -          |
| 2.92739E-06 | 97.14285714            | GENE BODY                   | -          | -          |
| 0.000703795 | 100                    | PROMOTER (187bp); 5'UTR (1  | -          | -          |
| 0.008505711 | 90                     | GENE BODY                   | -          | -          |
| 0.00286027  | 44.23076923            | GENE BODY                   | -          | -          |
| -           | -                      | -                           | -          | -          |
| 6.41886E-05 | 28.191246              | PROMOTER                    | -          | -          |
| 0.009486365 | 42.64705882            | GENE BODY                   | -          | -          |
| 2.45968E-10 | 93.33333333            | GENE BODY                   | -          | -          |
| 0.008526819 | 86.66666667            | GENE BODY                   | -          | -          |
| 0.004711596 | 66.66666667            | GENE BODY                   | -          | -          |
| -           | -                      | -                           | -          | -          |
| 0.005934657 | 87.5                   | GENE BODY                   | -          | -          |
| 7.19661E-05 | 54.16666667            | GENE BODY (147bp); 3'UTR (5 | -          | -          |
| 0.000163436 | 100                    | GENE BODY                   | -          | -          |
| 0.00397489  | 64.28571429            | GENE BODY                   | -          | -          |
| 0.003404756 | 46.55172414            | GENE BODY                   | -          | -          |
| 0.001933999 | 100                    | GENE BODY                   | -          | -          |
| -           | -                      | -                           | 4.1379E-06 | 0.00218428 |
| 0.005008332 | 39.53488372            | GENE BODY                   | -          | -          |
| 0.002979043 | 76.66666667            | GENE BODY                   | -          | -          |
| 0.000254749 | 28.18035427            | GENE BODY                   | -          | -          |
| 0.008968817 | 72.22222222            | GENE BODY                   | -          | -          |
| -           | -                      | -                           | -          | -          |
| 8.92381E-05 | 91.89189189            | GENE BODY                   | -          | -          |
| 0.000427669 | 84.59459459            | GENE BODY                   | -          | -          |

|             |             |                            |            |            |
|-------------|-------------|----------------------------|------------|------------|
| 0.000128408 | 56.66666667 | GENE BODY                  | -          | -          |
| 5.63119E-06 | 65.46610169 | PROMOTER                   | -          | -          |
| 0.000499771 | 77.27272727 | GENE BODY                  | -          | -          |
| 0.00023892  | 84.61538462 | GENE BODY                  | -          | -          |
| -           | -           | -                          | 6.0542E-06 | 0.00290234 |
| -           | -           | -                          | 1.665E-07  | 0.00019181 |
| -           | -           | -                          | 1.5639E-05 | 0.00560042 |
| 0.008002959 | 68.11594203 | GENE BODY                  | -          | -          |
| 0.004905666 | 76.92307692 | GENE BODY                  | -          | -          |
| -           | -           | -                          | 4.0474E-15 | 4.2808E-11 |
| 0.000227945 | 47.43961353 | GENE BODY                  | -          | -          |
| 0.002774689 | 58.20895522 | 3'UTR                      | -          | -          |
| 1.79916E-05 | 100         | GENE BODY                  | -          | -          |
| 2.76356E-05 | 100         | GENE BODY                  | -          | -          |
| -           | -           | -                          | 2.5418E-07 | 0.00026533 |
| -           | -           | -                          | -          | -          |
| 2.29387E-06 | 68.88888889 | PROMOTER (145bp); 5'UTR (5 | -          | -          |
| 0.009468768 | 51.46871009 | GENE BODY                  | -          | -          |
| 0.007970342 | 56.41025641 | GENE BODY                  | -          | -          |
| 0.008730732 | 37.14285714 | GENE BODY                  | -          | -          |
| -           | -           | -                          | -          | -          |
| -           | -           | -                          | -          | -          |
| 0.002126331 | 76.19047619 | GENE BODY                  | -          | -          |
| 2.16506E-05 | 68.29268293 | GENE BODY                  | -          | -          |
| 0.000115391 | 100         | GENE BODY                  | -          | -          |
| 0.008698249 | 53.84615385 | GENE BODY                  | 4.4413E-08 | 6.5312E-05 |
| 0.00218781  | 80          | GENE BODY                  | -          | -          |
| -           | -           | -                          | -          | -          |
| 0.001933999 | 100         | GENE BODY                  | -          | -          |
| 0.001933999 | 100         | GENE BODY                  | -          | -          |
| 0.001098386 | 51.2195122  | PROMOTER (7bp); 5'UTR (193 | -          | -          |
| 0.00432082  | 44.11764706 | 3'UTR                      | -          | -          |
| 0.000115391 | 100         | GENE BODY                  | -          | -          |
| -           | -           | -                          | -          | -          |
| 2.84235E-06 | 64.28571429 | GENE BODY                  | -          | -          |
| -           | -           | -                          | 8.5873E-08 | 0.00011217 |
| 0.001377202 | 75          | GENE BODY                  | -          | -          |
| 1.67271E-13 | 37.67292127 | GENE BODY                  | -          | -          |
| 0.000137899 | 37.89431384 | GENE BODY                  | -          | -          |
| 0.002513721 | 29.69866418 | PROMOTER                   | 2.5793E-05 | 0.00787429 |
| 0.000105925 | 51.66666667 | GENE BODY                  | -          | -          |

|             |             |                             |            |            |
|-------------|-------------|-----------------------------|------------|------------|
| 0.005138627 | 54.16666667 | GENE BODY                   | -          | -          |
| -           | -           | -                           | 2.1726E-07 | 0.00023551 |
| -           | -           | -                           | -          | -          |
| 8.79837E-06 | 92          | 3'UTR (151bp); GENE BODY (4 | 1.0104E-18 | 2.2302E-14 |
| -           | -           | -                           | 7.0929E-06 | 0.00324597 |
| -           | -           | -                           | 1.0261E-05 | 0.00420225 |
| 2.4749E-05  | 75.91836735 | GENE BODY                   | -          | -          |
| 1.13095E-05 | 100         | GENE BODY                   | -          | -          |
| 4.50083E-07 | 28.7049732  | GENE BODY                   | -          | -          |
| 0.00837369  | 49.89316239 | GENE BODY                   | 9.2141E-06 | 0.00390898 |
| 6.21853E-10 | 100         | GENE BODY                   | -          | -          |
| 0.005131118 | 36.1025641  | GENE BODY                   | -          | -          |
| 0.000709141 | 92.85714286 | GENE BODY                   | -          | -          |
| 0.006629474 | 70          | GENE BODY                   | -          | -          |

| ontext         |           | CHH context |            |                           |          |
|----------------|-----------|-------------|------------|---------------------------|----------|
| hylation Diffe | Region    | P value     | q value    | % Methylation Differences | Region   |
| -              | -         | -           | -          | -                         | -        |
| -              | -         | -           | -          | -                         | -        |
| -              | -         | -           | -          | -                         | -        |
| -              | -         | -           | -          | -                         | -        |
| -              | -         | 2.10E-08    | 1.6971E-05 | 39.90863787               | PROMOTER |
| 28.0346288     | GENE BODY | -           | -          | -                         | -        |
| -              | -         | -           | -          | -                         | -        |
| -              | -         | 1.4356E-05  | 0.0024849  | 38.65327381               | PROMOTER |
| 53.4659433     | GENE BODY | -           | -          | -                         | -        |
| -              | -         | -           | -          | -                         | -        |
| -              | -         | -           | -          | -                         | -        |
| -              | -         | -           | -          | -                         | -        |
| -              | -         | -           | -          | -                         | -        |
| -              | -         | -           | -          | -                         | -        |
| -              | -         | -           | -          | -                         | -        |
| -              | -         | -           | -          | -                         | -        |
| -              | -         | 7.60E-07    | 0.00028388 | 37.11340206               | PROMOTER |
| -              | -         | -           | -          | -                         | -        |
| -              | -         | -           | -          | -                         | -        |
| -              | -         | -           | -          | -                         | -        |
| -              | -         | -           | -          | -                         | -        |
| -              | -         | -           | -          | -                         | -        |
| -              | -         | 5.18E-06    | 0.00119179 | 35.88383838               | PROMOTER |
| -              | -         | -           | -          | -                         | -        |
| -              | -         | -           | -          | -                         | -        |
| -              | -         | -           | -          | -                         | -        |
| -              | -         | -           | -          | -                         | -        |
| -              | -         | -           | -          | -                         | -        |
| 65.5737705     | PROMOTER  | -           | -          | -                         | -        |
| -              | -         | -           | -          | -                         | -        |
| -              | -         | -           | -          | -                         | -        |
| -              | -         | -           | -          | -                         | -        |
| -              | -         | -           | -          | -                         | -        |
| -              | -         | 8.03E-08    | 4.9359E-05 | 29.06131938               | PROMOTER |
| -              | -         | -           | -          | -                         | -        |
| -              | -         | -           | -          | -                         | -        |

|            |           |           |            |             |             |
|------------|-----------|-----------|------------|-------------|-------------|
| -          | -         | -         | -          | -           | -           |
| -          | -         | -         | -          | -           | -           |
| -          | -         | -         | -          | -           | -           |
| -          | -         | -         | -          | -           | -           |
| 34.8148148 | GENE BODY | -         | -          | -           | -           |
| 78.8157895 | GENE BODY | -         | -          | -           | -           |
| 42.039312  | GENE BODY | -         | -          | -           | -           |
| -          | -         | -         | -          | -           | -           |
| -          | -         | -         | -          | -           | -           |
| 60.6060606 | GENE BODY | -         | -          | -           | -           |
| -          | -         | -         | -          | -           | -           |
| -          | -         | -         | -          | -           | -           |
| -          | -         | -         | -          | -           | -           |
| -          | -         | -         | -          | -           | -           |
| 50         | PROMOTER  | -         | -          | -           | -           |
| -          | -         | 5.51E-07  | 0.00022254 | 25.77436524 | GENE BODY   |
| -          | -         | 8.18E-16  | 7.7844E-12 | 37.10462287 | PROMOTER (C |
| -          | -         | -         | -          | -           | -           |
| -          | -         | -         | -          | -           | -           |
| -          | -         | -         | -          | -           | -           |
| -          | -         | 8.49E-10  | 1.2525E-06 | 42.42424242 | 3'UTR       |
| -          | -         | 5.901E-05 | 0.00672815 | 25.42982563 | PROMOTER    |
| -          | -         | -         | -          | -           | -           |
| -          | -         | -         | -          | -           | -           |
| -          | -         | -         | -          | -           | -           |
| 31.4295502 | GENE BODY | -         | -          | -           | -           |
| -          | -         | -         | -          | -           | -           |
| -          | -         | 5.74E-06  | 0.00128561 | 29.32118165 | PROMOTER    |
| -          | -         | -         | -          | -           | -           |
| -          | -         | -         | -          | -           | -           |
| -          | -         | 1.94E-07  | 9.9989E-05 | 33.0977918  | PROMOTER (C |
| -          | -         | -         | -          | -           | -           |
| -          | -         | -         | -          | -           | -           |
| -          | -         | 5.83E-14  | 3.2916E-10 | 35.11047895 | PROMOTER    |
| -          | -         | -         | -          | -           | -           |
| 29.5338442 | GENE BODY | -         | -          | -           | -           |
| -          | -         | -         | -          | -           | -           |
| -          | -         | -         | -          | -           | -           |
| -          | -         | -         | -          | -           | -           |
| 47.6027397 | PROMOTER  | -         | -          | -           | -           |
| -          | -         | -         | -          | -           | -           |

|            |              |          |            |             |          |
|------------|--------------|----------|------------|-------------|----------|
| -          | -            | -        | -          | -           | -        |
| 29.7340248 | GENE BODY    | -        | -          | -           | -        |
| -          | -            | 4.20E-17 | 5.6978E-13 | 32.98980877 | PROMOTER |
| 87.012987  | 3'UTR (151bp | -        | -          | -           | -        |
| 65.3061224 | GENE BODY    | -        | -          | -           | -        |
| 33.4507997 | PROMOTER     | -        | -          | -           | -        |
| -          | -            | -        | -          | -           | -        |
| -          | -            | -        | -          | -           | -        |
| -          | -            | -        | -          | -           | -        |
| 29.3561368 | GENE BODY    | -        | -          | -           | -        |
| -          | -            | -        | -          | -           | -        |
| -          | -            | -        | -          | -           | -        |
| -          | -            | -        | -          | -           | -        |
| -          | -            | -        | -          | -           | -        |



145bp); 5'UTR (55bp)

7bp); 5'UTR (193 bp)



**Supplemental Table 13: List of 193 syncytium-differentially hypo-methylated genes.**

| Gene ID         | Annotation                                               | P value    |
|-----------------|----------------------------------------------------------|------------|
|                 |                                                          |            |
| Glyma.01G038600 | myb-like transcription factor family protein             | -          |
| Glyma.01G038700 | -                                                        | 1.0651E-05 |
| Glyma.02G021900 | -                                                        | 5.0293E-06 |
| Glyma.02G056800 | FAD/NAD(P)-binding oxidoreductase family protein         | 3.8586E-07 |
| Glyma.02G098100 | Ribosomal protein L12/ ATP-dependent Clp protease a      | 1.0354E-07 |
| Glyma.02G138900 | -                                                        | 3.8837E-21 |
| Glyma.02G161100 | basic region/leucine zipper motif 60                     | 3.2926E-07 |
| Glyma.02G218100 | indole-3-acetic acid inducible 9                         | 2.3219E-05 |
| Glyma.02G273400 | UDP-Glycosyltransferase superfamily protein              | -          |
| Glyma.02G274600 | Ethylene insensitive 3 family protein                    | 9.6376E-06 |
| Glyma.03G027600 | RAS associated with diabetes protein 51C                 | 3.9187E-11 |
| Glyma.03G079800 | RHOMBOID-like 1                                          | 2.2482E-05 |
| Glyma.03G114700 | Plant protein of unknown function (DUF247)               | -          |
| Glyma.03G133200 | Transmembrane proteins 14C                               | -          |
| Glyma.03G147700 | Disease resistance-responsive (dirigent-like protein) fa | -          |
| Glyma.03G235200 | regulatory particle triple-A ATPase 5A                   | 4.3948E-07 |
| Glyma.03G256800 | Glycosyl hydrolase superfamily protein                   | 2.2579E-06 |
| Glyma.04G007400 | FMN-linked oxidoreductases superfamily protein           | -          |
| Glyma.04G018200 | -                                                        | -          |
| Glyma.04G065700 | Phox (PX) domain-containing protein                      | -          |
| Glyma.04G079800 | Ribosomal protein S5 family protein                      | -          |
| Glyma.04G116700 | peroxin 5                                                | -          |
| Glyma.04G190500 | alpha/beta-Hydrolases superfamily protein                | 4.0062E-07 |
| Glyma.04G191100 | Pectin lyase-like superfamily protein                    | -          |
| Glyma.05G020900 | glycine-rich RNA-binding protein 3                       | 1.2893E-08 |
| Glyma.05G030700 | H(+)-ATPase 11                                           | 4.1138E-12 |
| Glyma.05G031900 | ARM repeat superfamily protein                           | -          |
| Glyma.05G041600 | ubiquitin-associated (UBA)/TS-N domain-containing p      | 2.505E-07  |
| Glyma.05G049500 | MBOAT (membrane bound O-acyl transferase) family         | 7.1683E-07 |
| Glyma.05G053000 | glycine-rich protein                                     | -          |
| Glyma.05G004900 | sirohochlorin ferrochelatase B                           | 9.0062E-06 |
| Glyma.05G075400 | Proteasome component (PCI) domain protein                | -          |
| Glyma.05G075100 | AMP-dependent synthetase and ligase family protein       | 5.6565E-08 |
| Glyma.05G143100 | IAP-like protein 1                                       | 1.8826E-05 |
| Glyma.05G150300 | Tic22-like family protein                                | 9.4958E-08 |
| Glyma.05G161000 | NAD(P)-binding Rossmann-fold superfamily protein         | -          |
| Glyma.06G016700 | Calcium-binding EF hand family protein                   | 3.4686E-06 |
| Glyma.06G056300 | P-type ATPase of Arabidopsis 2                           | -          |

|                 |                                                          |            |
|-----------------|----------------------------------------------------------|------------|
| Glyma.06G115100 | IAA-leucine resistant (ILR)-like gene 6                  | -          |
| Glyma.06G126000 | FTSH protease 11                                         | -          |
| Glyma.06G130800 | plastid transcriptionally active7                        | 7.9631E-06 |
| Glyma.06G148600 | like COV 2                                               | 1.5502E-05 |
| Glyma.06G202500 | U5 small nuclear ribonucleoprotein helicase              | -          |
| Glyma.06G208900 | ATPase E1-E2 type family protein / haloacid dehalogenase | 2.3735E-06 |
| Glyma.06G238500 | cytochrome P450, family 72, subfamily A, polypeptide     | 1.7281E-07 |
| Glyma.06G238700 | phytosylfokine-alpha receptor 2                          | 1.7281E-07 |
| Glyma.06G268700 | disease resistance protein (TIR-NBS-LRR class), putative | 1.0441E-06 |
| Glyma.06G271800 | -                                                        | -          |
| Glyma.06G311400 | nuclear factor Y, subunit C11                            | 5.4009E-08 |
| Glyma.07G029200 | Signal recognition particle, SRP54 subunit protein       | 8.9854E-09 |
| Glyma.07G072900 | RNAhelicase-like 8                                       | 2.2964E-06 |
| Glyma.07G077400 | S-adenosyl-L-methionine-dependent methyltransferase      | -          |
| Glyma.07G107300 | basic pentacysteine1                                     | 2.7303E-12 |
| Glyma.07G119900 | Vacuolar sorting protein 39                              | 1.8234E-05 |
| Glyma.07G156500 | Tautomerase/MIF superfamily protein                      | 1.0646E-08 |
| Glyma.07G165700 | -                                                        | -          |
| Glyma.07G177100 | Pentatricopeptide repeat (PPR-like) superfamily protein  | 6.7434E-11 |
| Glyma.07G190600 | Transducin/WD40 repeat-like superfamily protein          | -          |
| Glyma.07G197000 | Protein of unknown function (DUF616)                     | 1.5464E-06 |
| Glyma.07G205900 | Thioesterase/thiol ester dehydrase-isomerase superfamily | 5.3109E-10 |
| Glyma.07G268700 | Sec14p-like phosphatidylinositol transfer family protein | -          |
| Glyma.08G036600 | BURP domain-containing protein                           | -          |
| Glyma.08G044900 | associated molecule with the SH3 domain of STAM 1        | 1.5501E-08 |
| Glyma.08G082500 | O-acetyltransferase family protein                       | 7.9857E-06 |
| Glyma.08G139300 | binding                                                  | -          |
| Glyma.08G140400 | cytochrome P450, family 71, subfamily B, polypeptide     | -          |
| Glyma.08G191200 | -                                                        | 1.0607E-07 |
| Glyma.08G194600 | multidrug resistance-associated protein 6                | -          |
| Glyma.08G222300 | O-fucosyltransferase family protein                      | 7.5932E-08 |
| Glyma.08G265300 | RNA recognition motif (RRM)-containing protein           | -          |
| Glyma.08G271700 | ARF-GAP domain 8                                         | -          |
| Glyma.08G344800 | -                                                        | -          |
| Glyma.08G362400 | ENTH/VHS family protein                                  | 1.8241E-05 |
| Glyma.09G017000 | galacturonosyltransferase 4                              | 2.0949E-06 |
| Glyma.09G024400 | Calcium-dependent ARF-type GTPase activating protein     | 8.0892E-07 |
| Glyma.09G030300 | NAD(P)-binding Rossmann-fold superfamily protein         | 1.2977E-08 |
| Glyma.09G057800 | pumilio 5                                                | 5.4472E-09 |
| Glyma.09G202900 | Glycosyl hydrolase family protein                        | 1.0545E-13 |
| Glyma.09G259200 | Protein of unknown function (DUF3741)                    | 7.5754E-08 |

|                 |                                                          |            |
|-----------------|----------------------------------------------------------|------------|
| Glyma.10G023300 | Protein kinase family protein                            | -          |
| Glyma.10G025000 | -                                                        | 1.6408E-05 |
| Glyma.10G030000 | Beige/BEACH domain ;WD domain, G-beta repeat pro         | 2.3919E-06 |
| Glyma.10G102200 | -                                                        | 4.9133E-06 |
| Glyma.U032500   | uricase / urate oxidase / nodulin 35, putative           | 1.5302E-06 |
| Glyma.U032300   | exocyst subunit exo70 family protein A1                  | 4.0062E-07 |
| Glyma.10G195900 | nudix hydrolase homolog 26                               | 3.0688E-08 |
| Glyma.10G209600 | Zinc finger (C2H2 type) family protein / transcription f | 5.5574E-08 |
| Glyma.10G235100 | tubulin beta 8                                           | -          |
| Glyma.10G241900 | DEAD box RNA helicase (PRH75)                            | 8.0746E-06 |
| Glyma.10G243300 | Aluminium induced protein with YGL and LRDR motifs       | -          |
| Glyma.11G039900 | pleckstrin homology (PH) domain-containing protein       | 1.6121E-06 |
| Glyma.11G040000 | -                                                        | 8.5472E-07 |
| Glyma.11G055200 | ralf-like 34                                             | -          |
| Glyma.11G096200 | Pyridoxal phosphate (PLP)-dependent transferases su      | -          |
| Glyma.11G110100 | ATPase, F0/V0 complex, subunit C protein                 | 3.2406E-16 |
| Glyma.11G141100 | SEC14 cytosolic factor family protein / phosphoglyceri   | -          |
| Glyma.U034000   | nuclear RNA polymerase C1                                | 8.4711E-06 |
| Glyma.11G188900 | Ribosomal protein L24e family protein                    | 1.7344E-07 |
| Glyma.11G152600 | Ribosomal RNA processing Brix domain protein             | 2.8351E-06 |
| Glyma.11G222900 | BTB/POZ/MATH-domains containing protein                  | 1.5464E-06 |
| Glyma.12G137100 | Protein kinase superfamily protein                       | 8.0057E-07 |
| Glyma.12G230600 | RAB GTPase homolog A1B                                   | 2.7635E-06 |
| Glyma.13G084100 | MAPK/ERK kinase kinase 1                                 | 7.1413E-07 |
| Glyma.13G078800 | 3\'-5\' exonuclease domain-containing protein            | 1.2754E-07 |
| Glyma.13G166100 | Protein kinase superfamily protein                       | -          |
| Glyma.13G174900 | HAESA-like 1                                             | -          |
| Glyma.13G194900 | Disease resistance protein (TIR-NBS-LRR class) family    | 1.2734E-07 |
| Glyma.13G225300 | -                                                        | 6.2265E-06 |
| Glyma.13G253600 | pyrophosphorylase 6                                      | 2.8351E-06 |
| Glyma.13G259200 | interactor of constitutive active rops 1                 | -          |
| Glyma.13G275400 | MATE efflux family protein                               | 1.6924E-07 |
| Glyma.13G277200 | P-loop containing nucleoside triphosphate hydrolases     | -          |
| Glyma.13G278800 | Leucine-rich repeat (LRR) family protein                 | 7.7715E-06 |
| Glyma.13G289400 | WRKY DNA-binding protein 69                              | 4.9603E-07 |
| Glyma.13G328200 | -                                                        | -          |
| Glyma.13G345000 | Tetratricopeptide repeat (TPR)-like superfamily protei   | -          |
| Glyma.13G367200 | Leucine-rich repeat family protein                       | -          |
| Glyma.14G018300 | microtubule-associated proteins 65-1                     | 8.8957E-06 |
| Glyma.14G084400 | -                                                        | 4.1306E-13 |
| Glyma.14G131700 | Protein of unknown function (DUF1218)                    | -          |

|                 |                                                         |            |
|-----------------|---------------------------------------------------------|------------|
| Glyma.14G137100 | DNA topoisomerase, type IA, core                        | 1.016E-06  |
| Glyma.14G142100 | signal peptide peptidase                                | -          |
| Glyma.14G121200 | alcohol dehydrogenase 1                                 | 4.7527E-13 |
| Glyma.14G162300 | NADH-dependent glutamate synthase 1                     | 2.3581E-07 |
| Glyma.14G190400 | B-box type zinc finger protein with CCT domain          | 8.8471E-07 |
| Glyma.14G200600 | Protein of unknown function (DUF567)                    | 7.8657E-07 |
| Glyma.14G204100 | Basic-leucine zipper (bZIP) transcription factor family | 3.5589E-07 |
| Glyma.15G023800 | beta galactosidase 1                                    | 7.396E-07  |
| Glyma.15G071300 | Aluminium induced protein with YGL and LRDR motifs      | -          |
| Glyma.15G076300 | protease-related                                        | -          |
| Glyma.15G097000 | chromatin remodeling factor17                           | 2.6737E-07 |
| Glyma.15G098100 | beta-amylase 3                                          | 9.906E-06  |
| Glyma.15G125700 | Galactose oxidase/kelch repeat superfamily protein      | 8.7408E-07 |
| Glyma.15G163200 | -                                                       | -          |
| Glyma.15G193400 | cation-chloride co-transporter 1                        | -          |
| Glyma.15G212800 | guanyl-nucleotide exchange factors;GTPase binding;G     | 4.0062E-07 |
| Glyma.15G219300 | Ca(2)-dependent phospholipid-binding protein (Copin     | -          |
| Glyma.15G209000 | Ribosomal protein L13 family protein                    | 1.8881E-09 |
| Glyma.15G248800 | Family of unknown function (DUF572)                     | -          |
| Glyma.15G255100 | -                                                       | -          |
| Glyma.15G255900 | eukaryotic translation initiation factor 2 gamma subun  | 1.1248E-05 |
| Glyma.15G271800 | tetratricopeptide repeat (TPR)-containing protein       | 9.5091E-06 |
| Glyma.16G014200 | exocyst complex component sec10                         | 3.6024E-10 |
| Glyma.16G039900 | ARM repeat superfamily protein                          | 3.9291E-09 |
| Glyma.16G049600 | ARM repeat superfamily protein                          | 2.8351E-06 |
| Glyma.16G071500 | -                                                       | 3.63E-06   |
| Glyma.16G073700 | Uncharacterised protein family (UPF0497)                | -          |
| Glyma.16G078500 | translocase inner membrane subunit 17-2                 | -          |
| Glyma.16G115700 | diacylglycerol acyltransferase family                   | -          |
| Glyma.16G128600 | calcium-dependent protein kinase 28                     | 1.5464E-06 |
| Glyma.16G153800 | novel cap-binding protein                               | 1.0825E-05 |
| Glyma.17G017700 | CBS domain-containing protein with a domain of unkn     | -          |
| Glyma.17G037600 | ubiquitin protein ligase 6                              | 1.1555E-05 |
| Glyma.17G039300 | pleiotropic drug resistance 9                           | 8.6716E-06 |
| Glyma.17G044200 | Haloacid dehalogenase-like hydrolase (HAD) superfam     | 1.4172E-07 |
| Glyma.17G059800 | PA-domain containing subtilase family protein           | 2.353E-05  |
| Glyma.17G089100 | Transducin family protein / WD-40 repeat family prote   | 2.8351E-06 |
| Glyma.17G100600 | malate dehydrogenase                                    | 1.7286E-05 |
| Glyma.17G188600 | non-ATPase subunit 9                                    | 3.6323E-06 |
| Glyma.17G213600 | calcium-binding EF hand family protein                  | 4.7736E-12 |
| Glyma.17G215800 | aberrant lateral root formation 4                       | 6.5195E-11 |

|                 |                                                       |            |
|-----------------|-------------------------------------------------------|------------|
| Glyma.17G226600 | Chalcone-flavanone isomerase family protein           | 1.3974E-05 |
| Glyma.17G253700 | UDP-Glycosyltransferase superfamily protein           | 1.0825E-05 |
| Glyma.18G013300 | sphere organelles protein-related                     | 1.107E-05  |
| Glyma.18G082200 | NB-ARC domain-containing disease resistance protein   | -          |
| Glyma.18G131200 | -                                                     | 2.4794E-05 |
| Glyma.18G133400 | eukaryotic translation initiation factor 3G1          | -          |
| Glyma.18G142600 | SOUL heme-binding family protein                      | -          |
| Glyma.18G157300 | Ribosomal protein S8e family protein                  | -          |
| Glyma.18G209800 | Protein of unknown function (DUF567)                  | 1.0444E-13 |
| Glyma.18G237100 | Protein kinase superfamily protein                    | 2.0251E-05 |
| Glyma.18G247300 | ATPase, V1 complex, subunit B protein                 | 4.8948E-06 |
| Glyma.18G280500 | little nuclei1                                        | 2.4541E-05 |
| Glyma.19G006200 | Pectin lyase-like superfamily protein                 | -          |
| Glyma.19G003900 | RNA-binding (RRM/RBD/RNP motifs) family protein       | -          |
| Glyma.19G016300 | SIN3-like 2                                           | 9.1678E-07 |
| Glyma.19G217000 | WRKY DNA-binding protein 35                           | 6.796E-10  |
| Glyma.19G250600 | transcription activators                              | 5.3487E-07 |
| Glyma.20G025100 | purin-rich alpha 1                                    | 2.8212E-06 |
| Glyma.20G104000 | thioredoxin X                                         | -          |
| Glyma.20G140100 | cysteine-rich RLK (RECEPTOR-like protein kinase) 25   | -          |
| Glyma.20G149100 | Tesmin/TSO1-like CXC domain-containing protein        | 1.5657E-09 |
| Glyma.20G162200 | -                                                     | 1.1346E-06 |
| Glyma.20G233700 | MIRO-related GTP-ase 1                                | 3.3652E-06 |
| Glyma.20G241600 | Chalcone-flavanone isomerase family protein           | -          |
| Glyma.01G168900 | DNA binding;zinc ion binding;nucleic acid binding;nuc | 4.1975E-08 |
| Glyma.01G245100 | histone deacetylase 1                                 | -          |
| Glyma.06G286700 | O-methyltransferase family protein                    | -          |
| Glyma.07G157400 | SU(VAR)3-9 homolog 9                                  | -          |
| Glyma.10G104300 | SERINE CARBOXYPEPTIDASE-LIKE 49                       | -          |
| Glyma.13G073900 | protein kinase 2A                                     | 5.3579E-07 |
| Glyma.19G239700 | DNAJ heat shock N-terminal domain-containing prote    | 8.7992E-07 |
| Glyma.20G130800 | Homeodomain-like protein with RING/FYVE/PHD-type      | 1.1911E-06 |

| CpG Context |                           |                 |            |            |
|-------------|---------------------------|-----------------|------------|------------|
| q value     | % Methylation Differences | Region          | P value    | q value    |
| -           | -                         | -               | -          | -          |
| 0.00531437  | -60.625                   | GENE BODY       | -          | -          |
| 0.00301984  | -83.33333333              | GENE BODY       | -          | -          |
| 0.00042882  | -72.58064516              | GENE BODY       | -          | -          |
| 0.00014754  | -100                      | 3'UTR(3bp); GEN | -          | -          |
| 1.6048E-16  | -39.52861953              | PROMOTER        | 6.2415E-06 | 0.00296784 |
| 0.00037703  | -32.78688525              | GENE BODY       | -          | -          |
| 0.0094854   | -52.38095238              | GENE BODY       | -          | -          |
| -           | -                         | -               | -          | -          |
| 0.00493135  | -63.15789474              | GENE BODY       | -          | -          |
| 1.9016E-07  | -100                      | GENE BODY       | -          | -          |
| 0.00925927  | -50                       | GENE BODY       | -          | -          |
| -           | -                         | -               | -          | -          |
| -           | -                         | -               | 8.5003E-08 | 0.00011117 |
| -           | -                         | -               | -          | -          |
| 0.00047655  | -47.22772277              | GENE BODY       | -          | -          |
| 0.00165915  | -70.83333333              | GENE BODY       | -          | -          |
| -           | -                         | -               | -          | -          |
| -           | -                         | -               | -          | -          |
| -           | -                         | -               | -          | -          |
| -           | -                         | -               | 2.2791E-08 | 3.8187E-05 |
| -           | -                         | -               | 1.0541E-05 | 0.00428296 |
| 0.0004402   | -100                      | GENE BODY       | -          | -          |
| -           | -                         | -               | -          | -          |
| 2.7636E-05  | -100                      | GENE BODY       | -          | -          |
| 2.697E-08   | -68.18181818              | GENE BODY       | -          | -          |
| -           | -                         | -               | 1.2088E-05 | 0.00470016 |
| 0.00030391  | -94.11764706              | GENE BODY       | -          | -          |
| 0.0006972   | -34                       | 3'UTR           | -          | -          |
| -           | -                         | -               | -          | -          |
| 0.00471802  | -58                       | GENE BODY       | -          | -          |
| -           | -                         | -               | 7.1002E-06 | 0.00324834 |
| 9.0959E-05  | -93.33333333              | GENE BODY       | -          | -          |
| 0.00811114  | -47.91666667              | GENE BODY       | -          | -          |
| 0.0001379   | -42.5                     | GENE BODY       | -          | -          |
| -           | -                         | -               | -          | -          |
| 0.00224912  | -75                       | GENE BODY       | -          | -          |
| -           | -                         | -               | -          | -          |

|            |              |                 |            |            |
|------------|--------------|-----------------|------------|------------|
| -          | -            | -               | 5.4717E-07 | 0.00049108 |
| -          | -            | -               | -          | -          |
| 0.00430384 | -81.81818182 | 5'UTR(73bp); GE | -          | -          |
| 0.00700902 | -39.28571429 | GENE BODY       | -          | -          |
| -          | -            | -               | 1.1474E-05 | 0.00452972 |
| 0.00172711 | -25.58139535 | GENE BODY       | -          | -          |
| 0.00022401 | -66.66666667 | GENE BODY       | -          | -          |
| 0.00022401 | -66.66666667 | GENE BODY       | -          | -          |
| 0.00091488 | -41.66666667 | GENE BODY       | -          | -          |
| -          | -            | -               | 3.2982E-05 | 0.0092852  |
| 8.7468E-05 | -54.05405405 | GENE BODY       | -          | -          |
| 2.0489E-05 | -43.14345992 | GENE BODY       | -          | -          |
| 0.00168086 | -71.96969697 | GENE BODY       | -          | -          |
| -          | -            | -               | -          | -          |
| 1.8995E-08 | -92.30769231 | PROMOTER        | -          | -          |
| 0.00793678 | -34.13105413 | GENE BODY       | -          | -          |
| 2.3682E-05 | -55.85516179 | GENE BODY       | -          | -          |
| -          | -            | -               | -          | -          |
| 3.055E-07  | -65          | GENE BODY       | -          | -          |
| -          | -            | -               | 2.3606E-06 | 0.00145558 |
| 0.00124045 | -100         | GENE BODY       | -          | -          |
| 1.8665E-06 | -97.2972973  | GENE BODY       | -          | -          |
| -          | -            | -               | -          | -          |
| -          | -            | -               | -          | -          |
| 3.2222E-05 | -100         | GENE BODY       | -          | -          |
| 0.00431265 | -35.13513514 | GENE BODY       | -          | -          |
| -          | -            | -               | 2.8308E-05 | 0.00837986 |
| -          | -            | -               | -          | -          |
| 0.00015027 | -53.57142857 | PROMOTER        | -          | -          |
| -          | -            | -               | 2.505E-05  | 0.00770727 |
| 0.0001153  | -28.57142857 | GENE BODY       | -          | -          |
| -          | -            | -               | 2.862E-09  | 6.7059E-06 |
| -          | -            | -               | -          | -          |
| -          | -            | -               | 1.4049E-07 | 0.00016704 |
| 0.00793678 | -41.66666667 | 3'UTR(20bp); GE | -          | -          |
| 0.00156444 | -73.33333333 | GENE BODY       | -          | -          |
| 0.00075604 | -47.72727273 | GENE BODY       | -          | -          |
| 2.7736E-05 | -96.66666667 | GENE BODY       | -          | -          |
| 1.3456E-05 | -100         | 5'UTR(62bp); GE | -          | -          |
| 1.0055E-09 | -38.83784606 | PROMOTER        | 9.6467E-10 | 2.6909E-06 |
| 0.00011516 | -81.25       | 3'UTR(11bp); GE | -          | -          |

|            |              |                 |            |            |
|------------|--------------|-----------------|------------|------------|
| -          | -            | -               | 5.6023E-06 | 0.00274885 |
| 0.00731223 | -28.94557823 | GENE BODY       | -          | -          |
| 0.00173679 | -60.86956522 | GENE BODY       | -          | -          |
| 0.00296454 | -34.53199365 | GENE BODY       | -          | -          |
| 0.00124045 | -52.93040293 | GENE BODY       | -          | -          |
| 0.0004402  | -100         | GENE BODY       | -          | -          |
| 5.4845E-05 | -36.43697019 | PROMOTER        | -          | -          |
| 8.9677E-05 | -55          | GENE BODY       | -          | -          |
| -          | -            | -               | -          | -          |
| 0.00434689 | -39.02439024 | GENE BODY       | -          | -          |
| -          | -            | -               | -          | -          |
| 0.00127808 | -81.81818182 | GENE BODY       | -          | -          |
| 0.00078803 | -44.44444444 | 3'UTR(125bp); G | -          | -          |
| -          | -            | -               | -          | -          |
| -          | -            | -               | -          | -          |
| 5.1988E-12 | -100         | GENE BODY       | -          | -          |
| -          | -            | -               | -          | -          |
| 0.00450349 | -44.42724458 | GENE BODY       | -          | -          |
| 0.00022439 | -41.77927928 | GENE BODY       | -          | -          |
| 0.001934   | -100         | GENE BODY       | -          | -          |
| 0.00124045 | -100         | GENE BODY       | -          | -          |
| 0.00075029 | -25.36509176 | PROMOTER        | -          | -          |
| 0.001934   | -63.15789474 | GENE BODY       | -          | -          |
| 0.00069508 | -76.78571429 | GENE BODY       | -          | -          |
| 0.00017408 | -75          | GENE BODY       | -          | -          |
| -          | -            | -               | 6.733E-07  | 0.00057772 |
| -          | -            | -               | 2.3043E-07 | 0.00024628 |
| 0.00017399 | -68.08510638 | GENE BODY       | -          | -          |
| 0.00354666 | -27.63918252 | PROMOTER        | -          | -          |
| 0.001934   | -100         | GENE BODY       | -          | -          |
| -          | -            | -               | -          | -          |
| 0.00022041 | -28.47144457 | GENE BODY       | -          | -          |
| -          | -            | -               | -          | -          |
| 0.00422378 | -63.07692308 | GENE BODY       | -          | -          |
| 0.00052515 | -90          | PROMOTER        | -          | -          |
| -          | -            | -               | -          | -          |
| -          | -            | -               | -          | -          |
| -          | -            | -               | -          | -          |
| 0.0046763  | -43.24561404 | GENE BODY       | -          | -          |
| 3.4345E-09 | -46.529723   | GENE BODY       | -          | -          |
| -          | -            | -               | -          | -          |



|            |              |                 |            |            |
|------------|--------------|-----------------|------------|------------|
| 0.00089734 | -34.16208791 | PROMOTER        | -          | -          |
| -          | -            | -               | 1.8126E-05 | 0.00617187 |
| 3.9042E-09 | -62.73465957 | PROMOTER (173   | -          | -          |
| 0.00029022 | -35.18156121 | GENE BODY       | 1.4922E-10 | 5.2125E-07 |
| 0.0008032  | -27.94117647 | 3'UTR(72bp); GE | -          | -          |
| 0.00073921 | -52.13600697 | GENE BODY       | -          | -          |
| 0.00040074 | -55.83982202 | GENE BODY       | -          | -          |
| 0.0007038  | -100         | GENE BODY       | -          | -          |
| -          | -            | -               | -          | -          |
| -          | -            | -               | 1.6653E-06 | 0.00111928 |
| 0.00032094 | -35.06979063 | GENE BODY       | -          | -          |
| 0.00503282 | -74.19354839 | GENE BODY       | -          | -          |
| 0.0007962  | -100         | GENE BODY       | -          | -          |
| -          | -            | -               | 1.2124E-05 | 0.00471036 |
| -          | -            | -               | -          | -          |
| 0.0004402  | -100         | GENE BODY       | -          | -          |
| -          | -            | -               | 1.5489E-06 | -          |
| 5.4781E-06 | -94.44444444 | 3'UTR(105bp); G | -          | -          |
| -          | -            | -               | -          | -          |
| -          | -            | -               | -          | -          |
| 0.00549954 | -33.1443299  | GENE BODY       | -          | -          |
| 0.0049024  | -58.33333333 | GENE BODY       | -          | -          |
| 1.3271E-06 | -52.5        | PROMOTER        | -          | -          |
| 1.0303E-05 | -85.48387097 | GENE BODY       | -          | -          |
| 0.001934   | -100         | GENE BODY       | -          | -          |
| 0.00233816 | -81.48148148 | GENE BODY       | -          | -          |
| -          | -            | -               | 3.2667E-05 | 0.00923579 |
| -          | -            | -               | -          | -          |
| -          | -            | -               | 7.8538E-06 | 0.00347622 |
| 0.00124045 | -100         | GENE BODY       | -          | -          |
| 0.00535311 | -100         | GENE BODY       | -          | -          |
| -          | -            | -               | -          | -          |
| 0.00561546 | -52.38095238 | GENE BODY       | -          | -          |
| 0.00459213 | -61.84210526 | GENE BODY       | -          | -          |
| 0.00018873 | -91.66666667 | GENE BODY       | -          | -          |
| 0.00956938 | -35.33204384 | GENE BODY       | -          | -          |
| 0.001934   | -100         | GENE BODY       | -          | -          |
| 0.00762355 | -68.75       | GENE BODY       | -          | -          |
| 0.00233855 | -88.23529412 | PROMOTER        | -          | -          |
| 3.0418E-08 | -39.43502825 | PROMOTER        | -          | -          |
| 2.9833E-07 | -100         | GENE BODY       | -          | -          |

|            |              |                 |            |            |
|------------|--------------|-----------------|------------|------------|
| 0.00648814 | -28.35820896 | 3'UTR           | -          | -          |
| 0.00535311 | -100         | GENE BODY       | -          | -          |
| 0.00542629 | -36.95652174 | PROMOTER        | -          | -          |
| -          | -            | -               | -          | -          |
| 0.00997621 | -32.29376258 | GENE BODY       | -          | -          |
| -          | -            | -               | -          | -          |
| -          | -            | -               | 6.3631E-07 | 0.00055329 |
| -          | -            | -               | 9.2357E-10 | 2.5857E-06 |
| 1.0055E-09 | -50.84745763 | GENE BODY       | -          | -          |
| 0.00854684 | -72.22222222 | GENE BODY       | -          | -          |
| 0.00295471 | -90          | GENE BODY       | -          | -          |
| 0.00989475 | -32.72727273 | GENE BODY       | -          | -          |
| -          | -            | -               | -          | -          |
| -          | -            | -               | 3.5652E-05 | 0.00973451 |
| 0.00082301 | -80.55555556 | GENE BODY       | -          | -          |
| 2.2939E-06 | -100         | 5'UTR(43bp); PR | -          | -          |
| 0.00055465 | -50          | GENE BODY       | -          | -          |
| 0.001934   | -85.71428571 | GENE BODY       | -          | -          |
| -          | -            | -               | -          | -          |
| -          | -            | -               | -          | -          |
| 4.6746E-06 | -55.88235294 | GENE BODY       | -          | -          |
| 0.00097983 | -34.82772935 | PROMOTER        | -          | -          |
| 0.00219556 | -93.33333333 | GENE BODY       | -          | -          |
| -          | -            | -               | -          | -          |
| 7.049E-05  | -84.02985075 | GENE BODY       | -          | -          |
| -          | -            | -               | 2.0984E-05 | -          |
| -          | -            | -               | -          | -          |
| -          | -            | -               | -          | -          |
| -          | -            | -               | 3.2371E-06 | 0.00183207 |
| 0.00055518 | -62.85714286 | GENE BODY       | -          | -          |
| 0.00079992 | -55.31914894 | GENE BODY       | -          | -          |
| 0.00101771 | -40.8445577  | GENE BODY       | -          | -          |

| CHG Context               |           | CHH context |            |                           |
|---------------------------|-----------|-------------|------------|---------------------------|
| % Methylation Differences | Region    | P value     | q value    | % Methylation Differences |
| -                         | -         | 8.55033E-05 | 0.00867934 | -42.30769231              |
| -                         | -         | -           | -          | -                         |
| -                         | -         | -           | -          | -                         |
| -                         | -         | -           | -          | -                         |
| -                         | -         | -           | -          | -                         |
| -37.26133076              | PROMOTER  | -           | -          | -                         |
| -                         | -         | -           | -          | -                         |
| -                         | -         | -           | -          | -                         |
| -                         | -         | 2.30839E-08 | 1.8335E-05 | -50.15698587              |
| -                         | -         | -           | -          | -                         |
| -                         | -         | -           | -          | -                         |
| -                         | -         | -           | -          | -                         |
| -                         | -         | 4.8121E-07  | 0.00020143 | -36.90360273              |
| -31.66410601              | GENE BODY | -           | -          | -                         |
| -                         | -         | 3.26192E-07 | 0.0001493  | -26.01455698              |
| -                         | -         | -           | -          | -                         |
| -                         | -         | -           | -          | -                         |
| -                         | -         | 6.68789E-05 | 0.0073291  | -27.30141309              |
| -                         | -         | 4.08327E-11 | 1.01E-07   | -28.63636364              |
| -                         | -         | 5.25008E-05 | 0.00620626 | -31.73935891              |
| -28.40153195              | GENE BODY | -           | -          | -                         |
| -37.35930736              | GENE BODY | -           | -          | -                         |
| -                         | -         | -           | -          | -                         |
| -                         | -         | 1.58145E-05 | 0.00266906 | -28.87657058              |
| -                         | -         | -           | -          | -                         |
| -                         | -         | -           | -          | -                         |
| -30.99415205              | GENE BODY | -           | -          | -                         |
| -                         | -         | -           | -          | -                         |
| -                         | -         | -           | -          | -                         |
| -                         | -         | 6.16521E-11 | 1.42E-07   | -40.54580897              |
| -                         | -         | -           | -          | -                         |
| -30.47504026              | GENE BODY | -           | -          | -                         |
| -                         | -         | -           | -          | -                         |
| -                         | -         | -           | -          | -                         |
| -                         | -         | -           | -          | -                         |
| -                         | -         | 5.98308E-05 | 0.00679065 | -28.87307458              |
| -                         | -         | -           | -          | -                         |
| -                         | -         | 4.79168E-21 | 1.887E-16  | -69.44136145              |

|              |           |             |            |              |
|--------------|-----------|-------------|------------|--------------|
| -50.25031289 | GENE BODY | -           | -          | -            |
| -            | -         | 1.66274E-11 | 4.71E-08   | -35.77694236 |
| -            | -         | -           | -          | -            |
| -            | -         | -           | -          | -            |
| -33.76344086 | GENE BODY | -           | -          | -            |
| -            | -         | -           | -          | -            |
| -            | -         | -           | -          | -            |
| -            | -         | -           | -          | -            |
| -            | -         | -           | -          | -            |
| -39.09294155 | GENE BODY | -           | -          | -            |
| -            | -         | -           | -          | -            |
| -            | -         | -           | -          | -            |
| -            | -         | -           | -          | -            |
| -            | -         | 1.83175E-07 | 9.5505E-05 | -36.86868687 |
| -            | -         | -           | -          | -            |
| -            | -         | -           | -          | -            |
| -            | -         | -           | -          | -            |
| -            | -         | 2.91112E-12 | 1.03E-08   | -35.62172594 |
| -            | -         | -           | -          | -            |
| -40          | PROMOTER  | -           | -          | -            |
| -            | -         | -           | -          | -            |
| -            | -         | -           | -          | -            |
| -            | -         | 1.44188E-07 | 7.884E-05  | -30.45751634 |
| -            | -         | 2.54054E-23 | 1.61E-18   | -27.13235294 |
| -            | -         | -           | -          | -            |
| -            | -         | -           | -          | -            |
| -41.3372093  | GENE BODY | -           | -          | -            |
| -            | -         | 1.415E-07   | 7.7525E-05 | -26.19937695 |
| -            | -         | -           | -          | -            |
| -76.81818182 | GENE BODY | -           | -          | -            |
| -            | -         | -           | -          | -            |
| -39.73888209 | GENE BODY | -           | -          | -            |
| -            | -         | 9.76647E-21 | 3.50E-16   | -37.81773782 |
| -28.20048309 | GENE BODY | -           | -          | -            |
| -            | -         | -           | -          | -            |
| -            | -         | -           | -          | -            |
| -            | -         | -           | -          | -            |
| -            | -         | -           | -          | -            |
| -            | -         | -           | -          | -            |
| -31.47239086 | PROMOTER  | -           | -          | -            |
| -            | -         | -           | -          | -            |

|              |           |             |            |              |
|--------------|-----------|-------------|------------|--------------|
| -34.84617728 | GENE BODY | -           | -          | -            |
| -            | -         | -           | -          | -            |
| -            | -         | -           | -          | -            |
| -            | -         | -           | -          | -            |
| -            | -         | -           | -          | -            |
| -            | -         | -           | -          | -            |
| -            | -         | -           | -          | -            |
| -            | -         | -           | -          | -            |
| -            | -         | 7.28271E-13 | 3.09E-09   | -43.98335583 |
| -            | -         | -           | -          | -            |
| -            | -         | 1.99762E-09 | 2.4958E-06 | -27.59076531 |
| -            | -         | -           | -          | -            |
| -            | -         | -           | -          | -            |
| -            | -         | 7.16356E-05 | 0.00767147 | -35.76923077 |
| -            | -         | 5.45277E-11 | 1.2828E-07 | -32.49249249 |
| -            | -         | -           | -          | -            |
| -            | -         | 2.78041E-09 | 0.00000326 | -28.45827961 |
| -            | -         | -           | -          | -            |
| -            | -         | -           | -          | -            |
| -            | -         | -           | -          | -            |
| -            | -         | -           | -          | -            |
| -            | -         | -           | -          | -            |
| -            | -         | -           | -          | -            |
| -            | -         | -           | -          | -            |
| -            | -         | -           | -          | -            |
| -            | -         | -           | -          | -            |
| -29.95126706 | GENE BODY | -           | -          | -            |
| -30.15777309 | GENE BODY | -           | -          | -            |
| -            | -         | -           | -          | -            |
| -            | -         | -           | -          | -            |
| -            | -         | -           | -          | -            |
| -            | -         | 4.83429E-18 | 8.9E-14    | -31.88932981 |
| -            | -         | -           | -          | -            |
| -            | -         | 1.51503E-10 | 3.01E-07   | -43.33333333 |
| -            | -         | -           | -          | -            |
| -            | -         | -           | -          | -            |
| -            | -         | 1.09279E-07 | 6.3102E-05 | -47.87878788 |
| -            | -         | 4.52304E-12 | 1.51E-08   | -48.29956156 |
| -            | -         | 1.56201E-23 | 1.03E-18   | -29.30094386 |
| -            | -         | -           | -          | -            |
| -            | -         | -           | -          | -            |
| -            | -         | 7.68396E-09 | 7.41E-06   | -31.02275538 |



|              |              |             |            |              |
|--------------|--------------|-------------|------------|--------------|
| -            | -            | -           | -          | -            |
| -            | -            | -           | -          | -            |
| -            | -            | -           | -          | -            |
| -            | -            | 3.33725E-05 | 0.00452853 | -25.35211268 |
| -            | -            | -           | -          | -            |
| -            | -            | 2.14128E-05 | 0.00330149 | -42.54716981 |
| -29.87711214 | PROMOTER     | -           | -          | -            |
| -30.30450908 | 5'UTR(73bp); | -           | -          | -            |
| -            | -            | -           | -          | -            |
| -            | -            | -           | -          | -            |
| -            | -            | -           | -          | -            |
| -            | -            | -           | -          | -            |
| -            | -            | 2.89179E-17 | 4.25E-13   | -26.5445801  |
| -70          | PROMOTER     | -           | -          | -            |
| -            | -            | -           | -          | -            |
| -            | -            | -           | -          | -            |
| -            | -            | -           | -          | -            |
| -            | -            | -           | -          | -            |
| -            | -            | 3.01146E-08 | 2.2615E-05 | -42.29607251 |
| -            | -            | 6.59259E-07 | 0.00025544 | -26.35332435 |
| -            | -            | -           | -          | -            |
| -            | -            | -           | -          | -            |
| -            | -            | -           | -          | -            |
| -            | -            | 6.43181E-18 | 1.13E-13   | -66.00498487 |
| -            | -            | -           | -          | -            |
| -71.21212121 | 3'UTR(65bp)  | -           | -          | -            |
| -            | -            | 1.10711E-05 | 0.00206784 | -29.0805417  |
| -            | -            | 2.49685E-07 | 0.00012142 | -33.66503368 |
| -29.50208706 | GENE BODY    | -           | -          | -            |
| -            | -            | -           | -          | -            |
| -            | -            | -           | -          | -            |
| -            | -            | -           | -          | -            |

| Region    |
|-----------|
| PROMOTER  |
| -         |
| -         |
| -         |
| -         |
| -         |
| -         |
| -         |
| GENE BODY |
| -         |
| -         |
| -         |
| GENE BODY |
| -         |
| PROMOTER  |
| -         |
| -         |
| PROMOTER  |
| PROMOTER  |
| PROMOTER  |
| -         |
| -         |
| -         |
| PROMOTER  |
| -         |
| -         |
| -         |
| -         |
| -         |
| PROMOTER  |
| -         |
| -         |
| -         |
| -         |
| -         |
| GENE BODY |
| -         |
| GENE BODY |



-  
PROMOTER

-  
-  
-  
-  
-  
-  
-  
-  
-  
-  
-

GENE BODY

-  
-  
-

PROMOTER

-  
-  
-  
-

PROMOTER

GENE BODY

-  
-  
-

PROMOTER

-  
-  
-  
-

PROMOTER

-  
-  
-  
-  
-  
-  
-  
-

-  
-  
-  
-  
-  
-  
-  
-

PROMOTER

-

PROMOTER

-

-

PROMOTER

PROMOTER

-

PROMOTER

-

-

-

-

-

-

-

-

-

-

-

-

-

PROMOTER

-

PROMOTER

-

-

PROMOTER

PROMOTER

GENE BODY

-

-

GENE BODY

-  
-  
-  
-  
-  
-

GENE BODY

-

PROMOTER

-  
-  
-  
-  
-

GENE BODY

-  
-  
-

5'UTR(40bp); PROMOTER(160bp)

PROMOTER

-  
-  
-  
-  
-  
-  
-

PROMOTER

-  
-  
-

GENE BODY

-  
-  
-  
-  
-  
-  
-  
-  
-

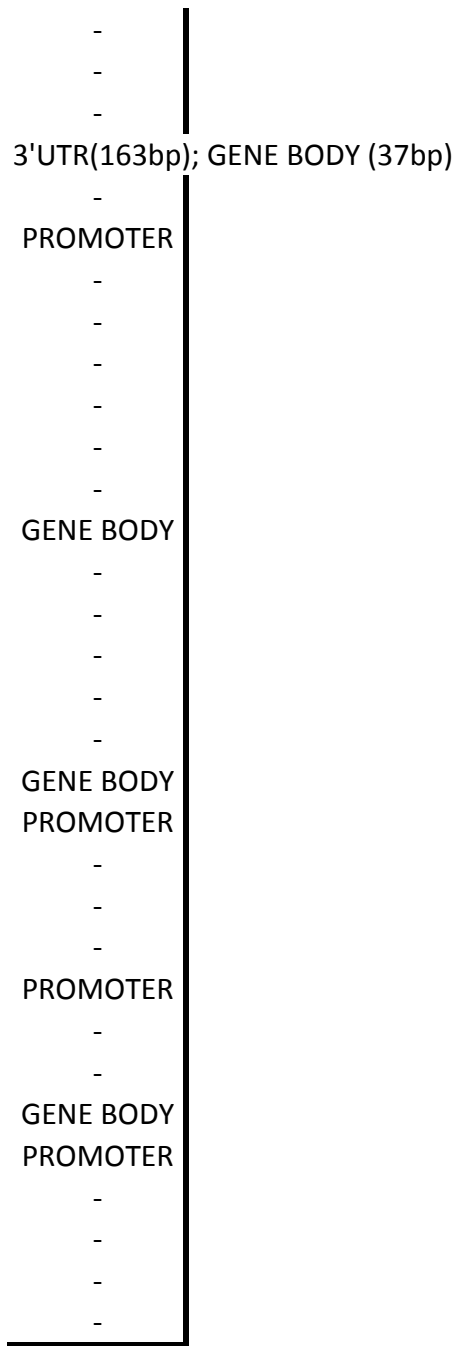

**Supplemental Table 14: Primer sequences used in qPCR assays.**

| Gene ID         | Direction | Sequence 5'-3'              |
|-----------------|-----------|-----------------------------|
| Glyma.02G211800 | Forward   | GGG CAG ATT ACC TTC CCG CG  |
|                 | Reverse   | CGAAGCTCGCGCAAGTCCTT        |
| Glyma.17G141300 | Forward   | CTTCCATGGCAGAACCTGCG        |
|                 | Reverse   | CCACAGGCTCCCAATGTAGC        |
| Glyma.17G204200 | Forward   | GACCATGCAATGCCAGCAGG        |
|                 | Reverse   | GCCACTGTCACCAAGAACTT        |
| Glyma.03G054100 | Forward   | GAT ACA TCG CCT CGT GGA GG  |
|                 | Reverse   | GCGAGTGGCTACACAAAGTC        |
| Glyma.01G027100 | Forward   | AGGCTTGTTGGAACACCAGGC       |
|                 | Reverse   | GCTGGCTTCTTGTTGTAC          |
| Glyma.01G140300 | Forward   | CTCAGACGGTCTTGA CTGGC       |
|                 | Reverse   | CCAAGTCCTCGCTTTCCACG        |
| Glyma.08G277400 | Forward   | GGG AAC TCC ACA CTT CCT TCG |
|                 | Reverse   | GGCAGCATAGCCTATTGGGT        |
| Glyma.05G058200 | Forward   | CCTTCAAGAGAGTCCCTTCCG       |
|                 | Reverse   | CGCTGCAATCGACGACGTTG        |
| Glyma.11G096600 | Forward   | AAGACACCAAAGCACTTGTG        |
|                 | Reverse   | GGAGCCAAGGACTATTCAACT       |
| Glyma.13G084100 | Forward   | GCAGAGGTTATGGGCTTCCA        |
|                 | Reverse   | GTGGCTCACCTCTTCCGATT        |
| Glyma.19G016300 | Forward   | CGCTTTAATGAGCGGGGTTT        |
|                 | Reverse   | CAGGGCGTTCAGCACTCATA        |
| Glyma.15G204600 | Forward   | CCAGACTCGTGCTGAAGTGT        |
|                 | Reverse   | GACACCAGCGATCGAGTTCA        |
| Glyma.13G129900 | Forward   | TCCTTAACGACACTGGCATCC       |
|                 | Reverse   | ATTCACGATTCGCTGAGCCT        |

|                 |                    |                                                      |
|-----------------|--------------------|------------------------------------------------------|
| Glyma.20G104000 | Forward<br>Reverse | TACAGTGGTGACATGCGGTG<br>GAGATGAGACGGCAAGGACC         |
| Glyma.09G219600 | Forward<br>Reverse | TAAAGCGGTTTGTGATCCCTGT<br>AAGAACACAGCTTCTCTGCAA      |
| Glyma.18G142600 | Forward<br>Reverse | TGTTTTGGTGCTGTGCCAAC<br>GTTCTGAAACTCGGGCTGA          |
| Glyma.13G305700 | Forward<br>Reverse | CCCAAGTCCATTGTTCCAAGC<br>ACTGGTTGATGAAGCTGACAAGT     |
| Glyma.10G235100 | Forward<br>Reverse | TGAGCCTTACAATGCAACCC<br>CCCAAAGCTTGGAGTGGTGA         |
| Glyma.09G068500 | Forward<br>Reverse | ACAGAAAGCGCCTGTTCCT<br>CCTCGCCCTTTTGAAGTGA           |
| Glyma.08G241900 | Forward<br>Reverse | ACTTGCACTCCATTGCTCCA<br>GGTATGGCCTGTCCATGTG          |
| Glyma.12G096900 | Forward<br>Reverse | CCGGATTAGCTGGACTGCAA<br>TTCCTCGTCTGATATGCCGC         |
| Glyma.15G015100 | Forward<br>Reverse | ACATCGCGCTGGGTGATAAT<br>GCCTAGCATCAGGAAACGGA         |
| Glyma.19G214900 | Forward<br>Reverse | GCAAACGTGGTAGAACCAGC<br>CGGTCTCAAGTGGGGGTTTT         |
| Glyma.01G245100 | Forward<br>Reverse | GCCTTTCAAGGAGATTTTCATGCT<br>CATCTTGGCCTGTGATCAGAAAG  |
| Glyma.20G141600 | Forward<br>Reverse | GTGTAATGTTGGATGTGTTCCC<br>ACACAA TTGAGTTCAACACAAACCG |

---
